# Supplementary material for: A YAP/TAZ–ARHGAP29–RhoA Signaling Axis Regulates Podocyte Protrusions and Integrin Adhesions
Source: Cells. 2023 Jul 6;12(13):1795. doi: 10.3390/cells12131795 (PMC10340513; doi:10.3390/cells12131795)
Supplement: Supplementary file 1 [file cells-12-01795-s001.zip › Supplementary Table S1.xlsx]

## Sheet: RNAseq
GeneID	featureCounts on EPB41L5 WT-1 repl. 1	featureCounts on EPB41L5 WT-2 repl. 1	featureCounts on EPB41L5 WT-1 repl. 2	featureCounts on EPB41L5 WT-2 repl. 2	featureCounts on EPB41L5 KO-1 repl. 1	featureCounts on EPB41L5 KO-2 repl. 1	featureCounts on EPB41L5 KO-1 repl. 2	featureCounts on EPB41L5 KO-2 repl. 2	Base mean	DESeq2 log2 (FC) EPB41L5 KO/WT	StdErr	Wald-Stats	P-value	P-adj	ENSEMBL	SYMBOL	GENENAME
25893	561.187	806.991	565.705	672.727	0.977527	0	0	0.95293	326.067	-5.93156	0.227046	-26.1249	1.90019e-150	3.03973e-146	ENSG00000162722	TRIM58	tripartite motif containing 58
2250	1813.06	1929.33	1755.57	1880.03	482.898	443.896	424.279	456.453	1148.19	-1.98439	0.0800567	-24.7874	1.22691e-135	9.81343e-132	ENSG00000138675	FGF5	fibroblast growth factor 5
3569	1799.33	1863.81	1788.26	2115.79	340.179	410.183	318.209	406.901	1130.33	-2.27094	0.102998	-22.0485	9.87338e-108	5.26481e-104	ENSG00000136244	IL6	interleukin 6
5603	465.039	500.127	445.827	534.578	49.8539	46.0753	57.0125	62.8933	270.176	-2.95086	0.139128	-21.2096	7.79034e-100	3.11555e-96	ENSG00000156711	MAPK13	mitogen-activated protein kinase 13
1292	2141.73	2493.56	2281.64	2090.26	232.651	324.775	242.635	375.454	1272.84	-2.76167	0.131214	-21.0471	2.4309e-98	7.77742e-95	ENSG00000142173	COL6A2	collagen type VI alpha 2 chain
1191	118.713	120.2	137.711	162.175	720.437	800.137	696.083	743.285	437.343	2.37152	0.114538	20.7051	3.1185e-95	8.31444e-92	ENSG00000120885	CLU	clusterin
9076	2232.97	2583.13	2111.24	2461.16	586.516	575.379	539.63	658.474	1468.56	-1.93044	0.0951993	-20.2778	2.0177e-91	4.61101e-88	ENSG00000163347	CLDN1	claudin 1
4744	322.78	590.159	333.875	408.441	9.77527	4.49515	2.65174	1.90586	209.26	-4.62054	0.229463	-20.1363	3.54718e-90	7.09303e-87	ENSG00000100285	NEFH	neurofilament heavy
10630	1487.34	1423.55	1463.3	1591.72	412.516	421.421	328.816	338.29	933.369	-1.92217	0.0991443	-19.3876	9.82376e-84	1.74612e-80	ENSG00000162493	PDPN	podoplanin
2591	1823.86	2165.96	1739.72	2006.17	482.898	512.447	535.652	423.101	1211.22	-1.91923	0.102105	-18.7967	8.04036e-79	1.28622e-75	ENSG00000115339	GALNT3	polypeptide N-acetylgalactosaminyltransferase 3
3488	17270.2	23873.6	19452.9	18417.4	4973.65	4646.86	5192.11	4108.08	12241.9	-1.98222	0.107753	-18.3961	1.41264e-75	2.05437e-72	ENSG00000115461	IGFBP5	insulin like growth factor binding protein 5
4121	296.291	358.715	291.274	294.318	21.5056	17.9806	34.4727	28.5879	167.893	-3.19439	0.174386	-18.318	5.94664e-75	7.92737e-72	ENSG00000111885	MAN1A1	mannosidase alpha class 1A member 1
3918	4314.86	5837.01	4703.97	4770.65	948.201	1046.25	1307.31	1094.92	3002.9	-2.06584	0.113821	-18.1499	1.28675e-73	1.5834e-70	ENSG00000058085	LAMC2	laminin subunit gamma 2
257194	923.211	922.477	820.322	894.967	272.73	295.556	265.174	268.726	582.895	-1.64451	0.0925923	-17.7608	1.42238e-70	1.62527e-67	ENSG00000172260	NEGR1	neuronal growth regulator 1
343172	11.7731	4.71373	9.90727	4.50487	269.797	180.93	257.219	198.209	117.132	3.84328	0.217123	17.7009	4.12496e-70	4.39914e-67	ENSG00000177462	OR2T8	olfactory receptor family 2 subfamily T member 8
1129	8.82986	24.04	13.8702	12.013	263.932	269.709	326.164	233.468	144.003	3.42411	0.201122	17.025	5.35706e-65	5.35606e-62	ENSG00000181072	CHRM2	cholinergic receptor muscarinic 2
80004	314.932	330.433	293.255	303.328	24.4382	51.6942	39.7762	40.976	174.854	-2.70425	0.163066	-16.5838	9.13285e-62	8.59402e-59	ENSG00000103067	ESRP2	epithelial splicing regulatory protein 2
1264	5176.26	4934.34	5562.93	5333.76	12234.7	11580.6	13506.7	13595.4	8990.59	1.25277	0.0770299	16.2634	1.79492e-59	1.59518e-56	ENSG00000130176	CNN1	calponin 1
1281	24.5274	32.9961	22.7867	31.5341	244.382	243.862	278.433	209.644	136.021	2.7658	0.170854	16.1881	6.12324e-59	5.15544e-56	ENSG00000168542	COL3A1	collagen type III alpha 1 chain
3815	19.6219	28.7538	18.8238	18.0195	204.303	205.653	236.005	235.374	120.819	2.89351	0.179153	16.151	1.11712e-58	8.93526e-56	ENSG00000157404	KIT	KIT proto-oncogene receptor tyrosine kinase
340578	126.561	144.24	165.451	109.618	2.93258	1.12379	0	0	68.741	-3.96871	0.249583	-15.9014	6.19983e-57	4.7228e-54	ENSG00000198354	DCAF12L2	DDB1 and CUL4 associated factor 12 like 2
1004	662.239	859.785	736.11	723.782	155.427	126.988	201.533	151.516	452.172	-2.10375	0.132478	-15.88	8.71534e-57	6.33724e-54	ENSG00000113361	CDH6	cadherin 6
9510	12234.3	13409.2	12375.2	12508.5	5083.14	5684.12	5101.96	5948.19	9043.06	-1.18901	0.0752639	-15.7979	3.21611e-56	2.23687e-53	ENSG00000154734	ADAMTS1	ADAM metallopeptidase with thrombospondin type 1 motif 1
64123	305.121	364.843	300.19	355.884	59.6291	40.4564	60.9901	40.976	191.011	-2.48032	0.157045	-15.7937	3.44037e-56	2.29315e-53	ENSG00000162618	ADGRL4	adhesion G protein-coupled receptor L4
595	6326.1	8213.21	6085.05	7770.9	2210.19	2343.1	2052.45	2203.17	4650.52	-1.6284	0.103226	-15.7751	4.61369e-56	2.95221e-53	ENSG00000110092	CCND1	cyclin D1
10763	766.235	1083.69	790.6	884.456	226.786	203.406	190.926	192.492	542.323	-1.99931	0.127249	-15.7118	1.25556e-55	7.72509e-53	ENSG00000132688	NES	nestin
2786	370.854	466.66	307.125	447.483	56.6965	41.5802	26.5174	50.5053	220.928	-2.78364	0.178713	-15.576	1.0599e-54	6.27972e-52	ENSG00000168243	GNG4	G protein subunit gamma 4
8091	3699.71	4357.37	3783.59	3983.8	1380.27	1480.03	1583.09	1691.45	2744.91	-1.33304	0.0876005	-15.2172	2.71816e-52	1.55295e-49	ENSG00000149948	HMGA2	high mobility group AT-hook 2
4222	264.896	399.253	260.561	415.949	24.4382	39.3326	26.5174	36.2113	183.395	-2.90839	0.192621	-15.099	1.64305e-51	9.06341e-49	ENSG00000005102	MEOX1	mesenchyme homeobox 1
84913	548.432	629.283	627.13	606.655	1503.44	1493.51	1800.53	1686.69	1111.96	1.38471	0.0922096	15.0169	5.68759e-51	3.03281e-48	ENSG00000168874	ATOH8	atonal bHLH transcription factor 8
728215	192.295	204.105	206.071	222.24	29.3258	29.2185	18.5622	30.4937	116.539	-2.58528	0.173035	-14.9408	1.78751e-50	9.22413e-48	ENSG00000204442	FAM155A	family with sequence similarity 155 member A
50863	598.468	815.476	703.416	695.251	197.46	169.692	208.162	180.104	446.004	-1.80721	0.121093	-14.9242	2.29347e-50	1.14652e-47	ENSG00000182667	NTM	neurotrimin
11226	361.043	546.322	379.448	432.467	74.292	80.9127	70.2712	83.8578	253.577	-2.26548	0.154637	-14.6502	1.34227e-48	6.50674e-46	ENSG00000139629	GALNT6	polypeptide N-acetylgalactosaminyltransferase 6
182	915.362	1189.27	938.219	1025.61	290.325	322.527	228.05	281.114	648.81	-1.76558	0.12067	-14.6314	1.76994e-48	8.32757e-46	ENSG00000101384	JAG1	jagged 1
81706	165.805	209.29	175.359	195.211	12.7078	23.5995	21.214	22.8703	103.257	-2.75993	0.190911	-14.4567	2.27501e-47	1.03981e-44	ENSG00000198729	PPP1R14C	protein phosphatase 1 regulatory inhibitor subunit 14C
2537	624.958	565.177	764.841	789.853	189.64	150.588	139.217	141.034	420.663	-1.99364	0.138883	-14.3549	9.92906e-47	4.41209e-44	ENSG00000126709	IFI6	interferon alpha inducible protein 6
5328	4138.26	4657.64	4273.01	5016.92	2025.43	2094.74	1937.1	2065	3276.01	-1.13	0.0795817	-14.1993	9.25372e-46	4.00086e-43	ENSG00000122861	PLAU	plasminogen activator, urokinase
1525	26.4896	21.6832	11.8887	21.0227	180.842	183.177	148.498	166.763	95.0455	2.63433	0.189074	13.9328	4.00356e-44	1.68539e-41	ENSG00000154639	CXADR	CXADR, Ig-like cell adhesion molecule
1287	103.996	160.738	107.989	127.638	4.88763	2.24758	6.62936	4.76465	64.8613	-3.33505	0.240021	-13.8948	6.80864e-44	2.79276e-41	ENSG00000188153	COL4A5	collagen type IV alpha 5 chain
3383	2390.93	2486.02	2525.36	2195.37	945.268	938.363	918.829	1136.84	1692.12	-1.24972	0.0903789	-13.8276	1.73782e-43	6.94999e-41	ENSG00000090339	ICAM1	intercellular adhesion molecule 1
2633	710.313	806.991	631.093	747.808	191.595	230.377	205.51	254.432	472.265	-1.63348	0.118541	-13.7799	3.36631e-43	1.31344e-40	ENSG00000117228	GBP1	guanylate binding protein 1
3397	2968.79	2642.05	2954.35	3043.79	6004.95	5544.77	5637.61	5688.99	4310.66	0.964717	0.0701655	13.7492	5.15268e-43	1.96256e-40	ENSG00000125968	ID1	inhibitor of DNA binding 1, HLH protein
3159	17309.5	19722.3	17757.8	17004.4	9033.32	9236.41	9180.34	9631.26	13609.4	-0.938805	0.0685385	-13.6975	1.05105e-42	3.91014e-40	ENSG00000137309	HMGA1	high mobility group AT-hook 1
3576	1039.96	1024.29	1190.85	1156.25	378.303	433.782	343.401	446.924	751.721	-1.40324	0.104103	-13.4793	2.07034e-41	7.52709e-39	ENSG00000169429	CXCL8	C-X-C motif chemokine ligand 8
5270	120.675	205.99	135.73	183.198	11.7303	13.4855	5.30349	3.81172	84.9904	-3.14018	0.233289	-13.4605	2.67236e-41	9.49994e-39	ENSG00000135919	SERPINE2	serpin family E member 2
54985	188.37	181.95	171.396	178.693	517.112	501.209	486.595	455.5	335.103	1.39077	0.103442	13.4449	3.29707e-41	1.14659e-38	ENSG00000103145	HCFC1R1	host cell factor C1 regulator 1
6347	1658.05	1922.26	1799.16	1842.49	517.112	651.797	608.575	751.861	1218.91	-1.45345	0.108637	-13.3789	8.03081e-41	2.73338e-38	ENSG00000108691	CCL2	C-C motif chemokine ligand 2
3398	545.489	461.946	468.614	528.571	1224.84	1129.41	1113.73	1158.76	828.92	1.1819	0.0883705	13.3744	8.539e-41	2.8458e-38	ENSG00000115738	ID2	inhibitor of DNA binding 2
5010	123.618	151.782	142.665	181.696	15.6404	10.1141	19.8881	9.5293	81.8666	-2.80377	0.211432	-13.2609	3.90302e-40	1.27422e-37	ENSG00000013297	CLDN11	claudin 11
55008	362.024	382.755	349.727	348.376	69.4044	69.6749	108.721	101.011	223.962	-1.90689	0.14456	-13.191	9.88183e-40	3.16159e-37	ENSG00000138642	HERC6	HECT and RLD domain containing E3 ubiquitin protein ligase family member 6
7980	2617.56	2144.75	2638.31	2767.49	1006.85	1100.19	977.168	1088.25	1792.57	-1.24437	0.0945468	-13.1614	1.46344e-39	4.59034e-37	ENSG00000105825	TFPI2	tissue factor pathway inhibitor 2
217	574.922	533.595	592.455	678.733	221.899	176.435	171.037	182.01	391.386	-1.57268	0.119648	-13.1442	1.83763e-39	5.65319e-37	ENSG00000111275	ALDH2	aldehyde dehydrogenase 2 family member
7052	2884.42	3519.27	2951.38	3003.24	1190.63	1047.37	1376.26	1253.1	2153.21	-1.30155	0.0994944	-13.0816	4.19552e-39	1.26633e-36	ENSG00000198959	TGM2	transglutaminase 2
290	251.16	385.112	208.053	255.276	37.146	38.2088	31.8209	20.9644	153.468	-2.61531	0.201193	-12.999	1.23897e-38	3.67033e-36	ENSG00000166825	ANPEP	alanyl aminopeptidase, membrane
6374	1297.01	1245.37	1239.4	1358.97	382.213	463.001	369.918	537.452	861.666	-1.48081	0.113941	-12.9963	1.28437e-38	3.73566e-36	ENSG00000163735	CXCL5	C-X-C motif chemokine ligand 5
147381	200.143	141.883	190.22	126.136	679.381	548.409	772.983	698.497	419.707	1.88253	0.145403	12.947	2.44462e-38	6.98332e-36	ENSG00000141668	CBLN2	cerebellin 2 precursor
4741	355.157	511.911	430.966	495.535	130.989	112.379	112.699	102.916	281.569	-1.82831	0.141982	-12.8771	6.0588e-38	1.7004e-35	ENSG00000104722	NEFM	neurofilament medium
9788	521.943	650.966	579.575	548.092	162.269	153.959	133.913	206.786	369.688	-1.69583	0.132011	-12.8461	9.04725e-38	2.49533e-35	ENSG00000170873	MTSS1	MTSS1, I-BAR domain containing
81931	7.84876	25.4542	14.8609	7.50811	184.753	175.311	202.858	161.998	97.574	2.83048	0.22071	12.8245	1.19589e-37	3.24249e-35	ENSG00000184635	ZNF93	zinc finger protein 93
148398	459.153	362.486	460.688	351.38	1027.38	1119.29	1084.56	1161.62	753.32	1.37216	0.107011	12.8227	1.22352e-37	3.2621e-35	ENSG00000187634	SAMD11	sterile alpha motif domain containing 11
4323	19674.9	21106.2	19383.6	20025.6	11932.7	10981.7	11947.4	11270.3	15790.3	-0.787859	0.061915	-12.7248	4.30342e-37	1.12855e-34	ENSG00000157227	MMP14	matrix metallopeptidase 14
51200	393.419	520.867	436.911	497.037	1167.17	1099.06	1165.44	1135.89	801.975	1.25996	0.0990404	12.7216	4.48461e-37	1.148e-34	ENSG00000128510	CPA4	carboxypeptidase A4
7546	0.981095	2.82824	5.94436	1.50162	84.0673	123.617	66.2936	123.881	51.1392	3.23322	0.254164	12.721	4.5211e-37	1.148e-34	ENSG00000043355	ZIC2	Zic family member 2
3487	2193.73	2452.08	2031.98	2690.91	819.167	958.591	681.498	806.178	1579.27	-1.45195	0.114391	-12.6928	6.47911e-37	1.61947e-34	ENSG00000141753	IGFBP4	insulin like growth factor binding protein 4
84433	76.5254	149.425	79.2582	114.123	4.88763	0	1.32587	0	53.1932	-3.29675	0.262315	-12.5679	3.17043e-36	7.80267e-34	ENSG00000198286	CARD11	caspase recruitment domain family member 11
2825	17.6597	26.3969	18.8238	27.0292	147.607	129.236	160.43	158.186	85.6711	2.35097	0.18717	12.5606	3.47597e-36	8.425e-34	ENSG00000183671	GPR1	G protein-coupled receptor 1
1026	1277.39	1335.87	1301.82	1364.97	2519.09	2329.61	2720.69	2653.91	1937.92	0.935963	0.0748092	12.5113	6.473e-36	1.5455e-33	ENSG00000124762	CDKN1A	cyclin dependent kinase inhibitor 1A
9411	4007.77	5064.43	3935.17	4114.45	1556.22	1883.47	1686.51	1852.5	3012.56	-1.25216	0.100405	-12.4712	1.07252e-35	2.52311e-33	ENSG00000137962	ARHGAP29	Rho GTPase activating protein 29
83987	215.841	306.393	219.941	285.308	48.8763	48.3229	38.4503	58.1287	152.658	-2.13854	0.171577	-12.464	1.1729e-35	2.71925e-33	ENSG00000169515	CCDC8	coiled-coil domain containing 8
6692	274.707	389.826	302.172	346.875	61.5842	78.6652	33.1468	56.2228	192.9	-2.21459	0.177731	-12.4603	1.22843e-35	2.8073e-33	ENSG00000166145	SPINT1	serine peptidase inhibitor, Kunitz type 1
64321	156.975	197.977	118.887	193.709	18.573	20.2282	10.607	22.8703	92.4784	-2.59613	0.211411	-12.28	1.16002e-34	2.61364e-32	ENSG00000164736	SOX17	SRY-box 17
3491	34670.9	33266.7	34594.2	35890.3	21293.5	21076.6	20836.1	22262.3	27986.3	-0.688248	0.0562511	-12.2353	2.01398e-34	4.47468e-32	ENSG00000142871	CYR61	cysteine rich angiogenic inducer 61
51435	273.726	372.385	265.515	273.295	919.852	855.203	1193.28	1127.32	660.072	1.66523	0.13613	12.2326	2.08184e-34	4.56208e-32	ENSG00000168077	SCARA3	scavenger receptor class A member 3
2152	695.597	1030.42	741.064	1285.39	184.753	169.692	214.791	227.75	568.682	-2.01218	0.165963	-12.1243	7.85283e-34	1.69759e-31	ENSG00000117525	F3	coagulation factor III, tissue factor
2313	222.709	378.513	180.312	351.38	40.0786	30.3423	34.4727	33.3525	158.895	-2.50925	0.207803	-12.0752	1.42869e-33	3.0473e-31	ENSG00000151702	FLI1	Fli-1 proto-oncogene, ETS transcription factor
9508	2359.53	2673.16	2195.45	2172.85	1014.67	1103.56	1058.05	1164.48	1717.72	-1.08666	0.0901196	-12.058	1.76029e-33	3.70517e-31	ENSG00000156140	ADAMTS3	ADAM metallopeptidase with thrombospondin type 1 motif 3
10391	567.073	674.064	501.308	674.228	199.415	205.653	226.724	183.915	404.048	-1.48782	0.124597	-11.941	7.23216e-33	1.5025e-30	ENSG00000103647	CORO2B	coronin 2B
26253	108.902	94.2747	131.767	166.68	11.7303	13.4855	3.97762	6.67051	67.1859	-2.79359	0.235121	-11.8815	1.47702e-32	3.02922e-30	ENSG00000166523	CLEC4E	C-type lectin domain family 4 member E
80243	83.3931	119.729	98.082	102.11	10.7528	8.9903	9.2811	4.76465	54.6379	-2.71248	0.230657	-11.7598	6.28676e-32	1.27303e-29	ENSG00000046889	PREX2	phosphatidylinositol-3,4,5-trisphosphate dependent Rac exchange factor 2
8829	3183.65	3571.12	3406.12	3249.51	6660.87	5871.79	6681.07	5942.47	4820.83	0.889392	0.0758154	11.731	8.839e-32	1.76747e-29	ENSG00000099250	NRP1	neuropilin 1
2882	95.1663	65.0495	75.2953	85.5925	1.95505	0	0	6.67051	41.2161	-3.02833	0.258337	-11.7224	9.78511e-32	1.9325e-29	ENSG00000116157	GPX7	glutathione peroxidase 7
4322	57.8846	31.582	55.4807	24.026	213.101	267.462	254.567	250.62	144.34	2.20088	0.18789	11.7137	1.08495e-31	2.11659e-29	ENSG00000137745	MMP13	matrix metallopeptidase 13
6482	1228.33	1744.55	1438.54	1549.67	564.033	583.246	620.508	615.592	1043.06	-1.272	0.108624	-11.7101	1.13129e-31	2.15444e-29	ENSG00000008513	ST3GAL1	ST3 beta-galactoside alpha-2,3-sialyltransferase 1
79413	417.947	432.249	393.319	429.464	112.416	120.245	131.261	170.574	275.934	-1.54463	0.131902	-11.7105	1.12665e-31	2.15444e-29	ENSG00000177494	ZBED2	zinc finger BED-type containing 2
64881	976.19	884.768	984.783	845.413	326.494	395.573	381.851	433.583	653.582	-1.21745	0.104933	-11.6021	4.01903e-31	7.56382e-29	ENSG00000280165	PCDH20	protocadherin 20
55092	737.784	766.453	811.405	734.293	304.011	345.003	338.097	380.219	552.158	-1.12188	0.0967677	-11.5935	4.44404e-31	8.26643e-29	ENSG00000171729	TMEM51	transmembrane protein 51
4257	307.083	248.414	279.385	378.409	86.0223	66.3035	76.9006	65.7521	188.534	-1.84498	0.159191	-11.5897	4.64864e-31	8.54762e-29	ENSG00000008394	MGST1	microsomal glutathione S-transferase 1
114795	16.6786	13.6698	17.8331	12.013	130.989	88.7793	124.632	115.304	64.9873	2.41003	0.208707	11.5474	7.60743e-31	1.36761e-28	ENSG00000139364	TMEM132B	transmembrane protein 132B
8482	6397.72	7124.81	6566.54	7345.94	2924.76	2880.27	3451.24	3599.21	5036.31	-1.06289	0.092046	-11.5474	7.60877e-31	1.36761e-28	ENSG00000138623	SEMA7A	semaphorin 7A (John Milton Hagen blood group)
6387	29.4329	32.9961	33.6847	43.547	199.415	169.692	206.836	139.128	106.841	2.08689	0.180779	11.5439	7.92578e-31	1.40876e-28	ENSG00000107562	CXCL12	C-X-C motif chemokine ligand 12
3037	156.975	187.607	147.618	175.69	37.146	37.085	22.5398	33.3525	99.7517	-2.06496	0.179365	-11.5126	1.1395e-30	2.00314e-28	ENSG00000170961	HAS2	hyaluronan synthase 2
2919	491.529	384.169	484.466	524.066	114.371	146.092	148.498	166.763	307.494	-1.59094	0.138732	-11.4677	1.9162e-30	3.29606e-28	ENSG00000163739	CXCL1	C-X-C motif chemokine ligand 1
285704	768.198	763.153	690.537	668.222	345.067	328.146	326.164	347.819	529.663	-1.07171	0.0934545	-11.4678	1.91555e-30	3.29606e-28	ENSG00000174136	RGMB	repulsive guidance molecule BMP co-receptor b
2878	310.026	389.826	315.051	384.415	83.0898	114.626	119.328	89.5754	225.742	-1.65973	0.145962	-11.3709	5.83696e-30	9.9334e-28	ENSG00000211445	GPX3	glutathione peroxidase 3
1839	2416.44	2877.26	2514.47	3175.93	1137.84	1114.8	1178.7	1336.96	1969.05	-1.16073	0.102238	-11.3532	7.14982e-30	1.20395e-27	ENSG00000113070	HBEGF	heparin binding EGF like growth factor
2242	104.977	114.544	98.082	150.162	9.77527	15.733	13.2587	16.1998	65.3415	-2.46072	0.217263	-11.326	9.75167e-30	1.62497e-27	ENSG00000182511	FES	FES proto-oncogene, tyrosine kinase
79009	1138.07	1119.51	1203.73	1142.73	1945.28	2005.96	2218.18	2145.04	1614.81	0.837424	0.0741629	11.2917	1.44256e-29	2.37904e-27	ENSG00000107625	DDX50	DExD-box helicase 50
55765	414.022	480.329	426.013	409.943	189.64	150.588	157.779	150.563	297.36	-1.34992	0.119726	-11.2751	1.74169e-29	2.84304e-27	ENSG00000163362	INAVA	innate immunity activator
1009	756.425	1169.48	653.88	976.054	250.247	193.292	220.095	146.751	545.778	-1.91091	0.170709	-11.1939	4.36684e-29	7.05619e-27	ENSG00000140937	CDH11	cadherin 11
3732	2245.73	2284.75	2214.27	2567.77	1258.08	1210.32	1133.62	1305.51	1777.51	-0.901665	0.0805722	-11.1908	4.52517e-29	7.23891e-27	ENSG00000085117	CD82	CD82 molecule
2861	83.3931	169.694	69.3509	199.716	6.84269	4.49515	2.65174	4.76465	67.6135	-2.91733	0.261546	-11.1542	6.83427e-29	1.08245e-26	ENSG00000170775	GPR37	G protein-coupled receptor 37
4060	8511	7625.88	8059.56	7857.99	13298.3	13587.7	15435.8	14971.5	11168.5	0.822777	0.0740985	11.1038	1.20182e-28	1.88485e-26	ENSG00000139329	LUM	lumican
23400	1450.06	1702.6	1416.74	1500.12	812.325	760.805	765.028	744.238	1143.99	-0.95561	0.0862757	-11.0762	1.63607e-28	2.54098e-26	ENSG00000159363	ATP13A2	ATPase cation transporting 13A2
2308	150.108	201.748	152.572	169.683	40.0786	37.085	37.1244	32.3996	102.6	-1.9535	0.176809	-11.0487	2.22492e-28	3.42231e-26	ENSG00000150907	FOXO1	forkhead box O1
1301	1444.17	1585.7	1582.19	1231.33	558.168	600.103	722.6	597.487	1040.22	-1.19329	0.108527	-10.9953	4.02493e-28	6.13208e-26	ENSG00000060718	COL11A1	collagen type XI alpha 1 chain
386618	72.6011	84.8472	81.2396	114.123	249.269	286.566	295.669	287.785	184.013	1.56663	0.142643	10.9828	4.62226e-28	6.97569e-26	ENSG00000180332	KCTD4	potassium channel tetramerization domain containing 4
2752	174.635	396.425	176.349	393.425	0	0	0	1.90586	142.843	-3.04587	0.277417	-10.9794	4.80152e-28	7.1785e-26	ENSG00000135821	GLUL	glutamate-ammonia ligase
122786	7289.54	8352.73	6922.21	7330.92	4314.8	4232.19	4111.53	4119.51	5834.18	-0.818671	0.0745843	-10.9764	4.96054e-28	7.34758e-26	ENSG00000139926	FRMD6	FERM domain containing 6
64115	127.542	150.368	136.72	138.149	347.022	325.899	371.244	384.031	247.622	1.29661	0.118226	10.9672	5.49491e-28	8.06441e-26	ENSG00000107738	VSIR	V-set immunoregulatory receptor
6582	53.9602	58.4503	55.4807	54.0584	0	0	1.32587	2.85879	28.2668	-2.90848	0.265607	-10.9503	6.6223e-28	9.63063e-26	ENSG00000112499	SLC22A2	solute carrier family 22 member 2
7099	60.8279	180.065	62.4158	129.14	1.95505	0	3.97762	1.90586	55.0358	-2.9598	0.270333	-10.9487	6.74024e-28	9.71384e-26	ENSG00000136869	TLR4	toll like receptor 4
11182	1050.75	1175.6	1036.3	1225.32	565.01	589.989	554.214	557.464	844.332	-0.959559	0.0876678	-10.9454	6.99104e-28	9.98533e-26	ENSG00000160326	SLC2A6	solute carrier family 2 member 6
80144	119.694	204.105	112.943	139.651	16.618	6.74273	19.8881	18.1057	79.7183	-2.50115	0.228665	-10.938	7.58153e-28	1.07329e-25	ENSG00000138759	FRAS1	Fraser extracellular matrix complex subunit 1
115207	200.143	236.158	227.867	223.742	60.6066	68.5511	33.1468	43.8348	136.756	-1.87307	0.171465	-10.924	8.85538e-28	1.23182e-25	ENSG00000178695	KCTD12	potassium channel tetramerization domain containing 12
23550	145.202	237.101	212.016	162.175	31.2808	39.3326	38.4503	36.2113	112.721	-2.06922	0.189411	-10.9245	8.80524e-28	1.23182e-25	ENSG00000125637	PSD4	pleckstrin and Sec7 domain containing 4
3773	137.353	191.378	147.618	160.674	13.6854	37.085	19.8881	26.682	91.7954	-2.25338	0.206526	-10.9108	1.02299e-27	1.41076e-25	ENSG00000153822	KCNJ16	potassium voltage-gated channel subfamily J member 16
3936	3453.46	6111.83	3309.03	5419.35	1071.37	1196.83	1258.25	1368.41	2898.57	-1.73176	0.158991	-10.8921	1.25658e-27	1.71808e-25	ENSG00000136167	LCP1	lymphocyte cytosolic protein 1
8425	2223.16	2543.06	2235.08	2383.07	1346.05	1295.73	1190.63	1167.34	1798.02	-0.888818	0.0818587	-10.858	1.82784e-27	2.47796e-25	ENSG00000090006	LTBP4	latent transforming growth factor beta binding protein 4
84141	715.219	755.14	726.203	900.973	354.842	364.107	348.704	334.478	562.458	-1.10033	0.101361	-10.8556	1.87593e-27	2.52179e-25	ENSG00000115363	EVA1A	eva-1 homolog A, regulator of programmed cell death
9315	1622.73	1630.95	1648.57	1522.65	2849.49	2585.84	2854.6	2646.29	2170.14	0.753468	0.0696092	10.8243	2.64227e-27	3.52236e-25	ENSG00000134986	NREP	neuronal regeneration related protein
1278	73.5822	66.935	95.1098	43.547	1.95505	0	1.32587	3.81172	35.7833	-2.86745	0.265412	-10.8038	3.30289e-27	4.36665e-25	ENSG00000164692	COL1A2	collagen type I alpha 2 chain
205	1809.14	1994.38	1639.65	1731.37	866.088	950.725	767.68	905.283	1333.04	-1.00989	0.0938114	-10.7651	5.03183e-27	6.59788e-25	ENSG00000162433	AK4	adenylate kinase 4
6662	299.234	378.041	275.422	316.842	99.7077	65.1797	45.0796	49.5523	191.132	-1.99145	0.185028	-10.763	5.14754e-27	6.69473e-25	ENSG00000125398	SOX9	SRY-box 9
3959	7568.17	8013.35	7593.92	7761.89	5064.56	4877.24	4575.58	4963.81	6302.32	-0.658867	0.0613754	-10.735	6.96987e-27	8.9917e-25	ENSG00000108679	LGALS3BP	galectin 3 binding protein
1435	455.228	482.215	408.18	387.419	149.562	179.806	185.622	153.422	300.182	-1.31613	0.122662	-10.7297	7.38273e-27	9.44812e-25	ENSG00000184371	CSF1	colony stimulating factor 1
81848	180.522	223.902	167.433	207.224	53.764	51.6942	47.7314	53.3641	123.204	-1.73469	0.161837	-10.7188	8.30853e-27	1.05485e-24	ENSG00000187678	SPRY4	sprouty RTK signaling antagonist 4
4790	2028.91	2080.17	1867.52	1904.06	1108.52	1160.87	1136.27	1182.59	1558.61	-0.768701	0.0719943	-10.6773	1.30059e-26	1.63823e-24	ENSG00000109320	NFKB1	nuclear factor kappa B subunit 1
81029	655.372	933.319	539.946	943.019	238.516	203.406	212.14	197.256	490.372	-1.68684	0.158031	-10.6742	1.3447e-26	1.68057e-24	ENSG00000111186	WNT5B	Wnt family member 5B
9568	136.372	175.351	114.924	171.185	25.4157	23.5995	34.4727	25.7291	88.3812	-2.09438	0.196674	-10.649	1.76227e-26	2.18535e-24	ENSG00000136928	GABBR2	gamma-aminobutyric acid type B receptor subunit 2
1490	11946.8	19288.6	11774.8	18671.2	5227.81	4683.95	4901.75	5354.51	10231.2	-1.49942	0.142315	-10.5359	5.89887e-26	7.25878e-24	ENSG00000118523	CTGF	connective tissue growth factor
1912	2225.12	2250.81	2095.39	2192.37	1290.33	1222.68	1328.52	1373.17	1747.3	-0.737182	0.0701137	-10.5141	7.43914e-26	9.08427e-24	ENSG00000134686	PHC2	polyhomeotic homolog 2
10318	5157.62	6127.85	5204.29	5574.02	2790.84	2894.88	2915.59	3263.78	4241.11	-0.874802	0.0832163	-10.5124	7.5751e-26	9.18022e-24	ENSG00000145901	TNIP1	TNFAIP3 interacting protein 1
90139	277.65	578.375	273.441	439.975	82.1122	60.6846	74.2488	62.8933	231.172	-2.10509	0.200283	-10.5106	7.7226e-26	9.28861e-24	ENSG00000157570	TSPAN18	tetraspanin 18
259307	302.177	283.767	366.569	330.357	112.416	100.017	99.4404	126.74	215.185	-1.43699	0.136787	-10.5054	8.16034e-26	9.74186e-24	ENSG00000104951	IL4I1	interleukin 4 induced 1
8776	827.063	853.657	911.469	819.886	459.437	460.753	464.055	419.289	651.951	-0.900031	0.0857252	-10.499	8.72702e-26	1.03412e-23	ENSG00000063601	MTMR1	myotubularin related protein 1
80310	45.1304	62.6926	61.4251	60.0649	0	0	5.30349	1.90586	29.5653	-2.77086	0.265509	-10.4361	1.69706e-25	1.99616e-23	ENSG00000170962	PDGFD	platelet derived growth factor D
221	704.426	790.493	710.351	774.837	1385.16	1299.1	1571.16	1455.12	1086.33	0.912822	0.0876896	10.4097	2.23954e-25	2.61503e-23	ENSG00000006534	ALDH3B1	aldehyde dehydrogenase 3 family member B1
4825	163.843	177.236	141.674	142.654	42.0336	39.3326	30.4951	40.976	97.2806	-1.8049	0.173865	-10.381	3.0245e-25	3.50601e-23	ENSG00000163623	NKX6-1	NK6 homeobox 1
56654	246.255	255.484	217.96	256.777	91.8875	65.1797	76.9006	85.7637	162.026	-1.48855	0.143673	-10.3607	3.74139e-25	4.30388e-23	ENSG00000107281	NPDC1	neural proliferation, differentiation and control 1
397	390.476	518.039	373.504	606.655	125.123	146.092	127.284	155.328	305.313	-1.61354	0.155746	-10.3601	3.7666e-25	4.30388e-23	ENSG00000111348	ARHGDIB	Rho GDP dissociation inhibitor beta
80781	4153.96	6061.39	4333.44	5161.08	2110.48	2058.78	2283.15	2064.05	3528.29	-1.16012	0.112125	-10.3467	4.33372e-25	4.91678e-23	ENSG00000182871	COL18A1	collagen type XVIII alpha 1 chain
84898	40.2249	82.0189	43.592	55.56	0	1.12379	0	0	27.815	-2.828	0.273746	-10.3308	5.11493e-25	5.76223e-23	ENSG00000120594	PLXDC2	plexin domain containing 2
84230	333.572	377.57	309.107	337.865	80.1572	55.0656	128.61	80.999	212.868	-1.77629	0.172025	-10.3258	5.38904e-25	6.01448e-23	ENSG00000171488	LRRC8C	leucine rich repeat containing 8 VRAC subunit C
2290	37.2816	104.173	43.592	91.599	0	0	0	0	34.5808	-2.84952	0.275974	-10.3253	5.41405e-25	6.01448e-23	ENSG00000176165	FOXG1	forkhead box G1
27069	6025.89	5251.1	6016.69	5862.33	9186.79	9643.23	10070	10202.1	7782.26	0.743549	0.0721478	10.3059	6.62592e-25	7.30998e-23	ENSG00000165678	GHITM	growth hormone inducible transmembrane protein
5329	1989.66	2099.5	2128.08	2426.62	1152.5	1135.03	928.11	1100.63	1620.02	-0.969462	0.0942732	-10.2835	8.36018e-25	9.16012e-23	ENSG00000011422	PLAUR	plasminogen activator, urokinase receptor
9830	911.438	1124.23	1009.55	921.996	488.763	514.695	449.471	485.041	738.147	-1.00379	0.0976686	-10.2775	8.89702e-25	9.68202e-23	ENSG00000106785	TRIM14	tripartite motif containing 14
55165	3503.49	3544.26	3390.27	3246.51	5876.89	5618.94	6886.58	6744.84	4851.47	0.855698	0.0836306	10.2319	1.42733e-24	1.54277e-22	ENSG00000138180	CEP55	centrosomal protein 55
127294	689.71	748.541	622.177	585.633	276.64	327.022	294.344	277.302	477.671	-1.13008	0.110462	-10.2305	1.44723e-24	1.55379e-22	ENSG00000142661	MYOM3	myomesin 3
4599	142.259	204.105	176.349	162.175	10.7528	42.7039	22.5398	21.9174	97.8503	-2.25303	0.220267	-10.2286	1.47617e-24	1.57428e-22	ENSG00000157601	MX1	MX dynamin like GTPase 1
114793	538.621	604.772	501.308	527.069	228.741	223.634	234.679	273.491	391.539	-1.13071	0.110552	-10.2279	1.48741e-24	1.57577e-22	ENSG00000157827	FMNL2	formin like 2
2150	2810.84	3483.45	2611.56	3111.36	1122.2	1351.92	1355.04	1502.77	2168.64	-1.1252	0.110215	-10.2092	1.8043e-24	1.8989e-22	ENSG00000164251	F2RL1	F2R like trypsin receptor 1
57574	296.291	511.44	332.884	424.959	105.573	93.2744	92.811	124.834	247.758	-1.71271	0.168714	-10.1516	3.26125e-24	3.40982e-22	ENSG00000144583	MARCH4	membrane associated ring-CH-type finger 4
983	5272.41	4371.04	4523.66	4441.8	8686.3	8341.88	8223.06	7747.32	6450.93	0.809173	0.0797746	10.1432	3.55139e-24	3.68907e-22	ENSG00000170312	CDK1	cyclin dependent kinase 1
79623	673.031	721.672	691.527	711.769	345.067	343.879	360.637	399.277	530.858	-0.922661	0.091255	-10.1108	4.94809e-24	5.10675e-22	ENSG00000158089	GALNT14	polypeptide N-acetylgalactosaminyltransferase 14
9529	1043.89	1104.9	1039.27	1055.64	603.134	634.94	590.013	635.604	838.424	-0.769935	0.0767297	-10.0344	1.07636e-23	1.10375e-21	ENSG00000166170	BAG5	BCL2 associated athanogene 5
3613	54.9413	53.7366	67.3694	67.573	178.887	205.653	175.015	200.115	125.411	1.52782	0.152302	10.0315	1.10782e-23	1.12878e-21	ENSG00000141401	IMPA2	inositol monophosphatase 2
3352	85.3553	176.765	74.3045	121.631	6.84269	6.74273	9.2811	14.2939	61.9021	-2.50668	0.250327	-10.0136	1.3281e-23	1.34466e-21	ENSG00000179546	HTR1D	5-hydroxytryptamine receptor 1D
64135	195.238	170.637	145.637	171.185	43.9887	25.8471	53.0349	40.023	105.699	-1.81853	0.181691	-10.0089	1.39261e-23	1.40111e-21	ENSG00000115267	IFIH1	interferon induced with helicase C domain 1
343171	34.3383	43.8377	49.5364	42.0454	0	0	0	0	21.2197	-2.74641	0.274556	-10.0031	1.47701e-23	1.47674e-21	ENSG00000238243	OR2W3	olfactory receptor family 2 subfamily W member 3
1282	32592	49481.9	34505	38941.6	16470.3	15984.8	18294.4	16574.3	27855.5	-1.15375	0.11539	-9.99867	1.54456e-23	1.53063e-21	ENSG00000187498	COL4A1	collagen type IV alpha 1 chain
26037	627.901	863.084	681.62	662.215	290.325	297.804	328.816	285.879	504.706	-1.18544	0.118564	-9.99832	1.55005e-23	1.53063e-21	ENSG00000197555	SIPA1L1	signal induced proliferation associated 1 like 1
3006	370.854	326.19	377.467	436.972	801.572	749.567	765.028	767.108	574.345	1.00642	0.100856	9.97875	1.88822e-23	1.85312e-21	ENSG00000187837	HIST1H1C	histone cluster 1 H1 family member c
3912	8869.1	9925.71	8808.55	8922.64	5598.29	5658.27	5988.96	5688.04	7432.45	-0.662487	0.0664041	-9.9766	1.92965e-23	1.88223e-21	ENSG00000091136	LAMB1	laminin subunit beta 1
1027	1491.26	1442.87	1452.41	1450.57	2349.97	2200.38	2287.13	2230.81	1863.17	0.627549	0.0631038	9.94471	2.6594e-23	2.57833e-21	ENSG00000111276	CDKN1B	cyclin dependent kinase inhibitor 1B
219743	337.497	271.04	314.06	345.373	726.302	694.501	668.239	616.545	496.695	1.06226	0.106826	9.94387	2.68197e-23	2.58454e-21	ENSG00000156521	TYSND1	trypsin domain containing 1
27242	805.479	1036.08	759.888	921.996	418.381	387.707	336.771	371.643	629.743	-1.16199	0.116867	-9.94279	2.71118e-23	2.59705e-21	ENSG00000146072	TNFRSF21	TNF receptor superfamily member 21
22808	918.305	994.126	877.784	833.4	1588.48	1526.1	1640.1	1608.55	1248.36	0.789716	0.0798102	9.89493	4.37916e-23	4.16985e-21	ENSG00000158186	MRAS	muscle RAS oncogene homolog
23616	474.85	483.629	471.586	468.506	231.674	252.852	196.229	220.127	349.932	-1.03436	0.104708	-9.87853	5.15837e-23	4.88275e-21	ENSG00000100092	SH3BP1	SH3 domain binding protein 1
837	301.196	289.895	328.921	279.302	130.011	114.626	128.61	122.928	211.936	-1.20921	0.122541	-9.86781	5.74021e-23	5.40154e-21	ENSG00000196954	CASP4	caspase 4
5563	94.1852	144.712	109.971	94.6022	12.7078	22.4758	14.5846	5.71758	62.3694	-2.29904	0.233348	-9.85242	6.69153e-23	6.2599e-21	ENSG00000162409	PRKAA2	protein kinase AMP-activated catalytic subunit alpha 2
6251	2626.39	2684	2788.9	2539.24	4440.9	4322.09	5129.8	5270.65	3725.25	0.828623	0.0841735	9.84422	7.26004e-23	6.75226e-21	ENSG00000148484	RSU1	Ras suppressor protein 1
84632	1375.5	1226.04	1309.74	1127.72	2103.64	2211.61	2357.4	2324.2	1754.48	0.815554	0.0829436	9.83263	8.14626e-23	7.5327e-21	ENSG00000169129	AFAP1L2	actin filament associated protein 1 like 2
3099	413.041	566.591	464.651	563.108	214.078	203.406	161.756	170.574	344.651	-1.32832	0.135701	-9.78859	1.26041e-22	1.15878e-20	ENSG00000159399	HK2	hexokinase 2
64207	1187.13	1400.92	1240.39	1244.84	703.819	723.719	733.207	709.933	992.995	-0.806528	0.0824975	-9.77639	1.42192e-22	1.29979e-20	ENSG00000119669	IRF2BPL	interferon regulatory factor 2 binding protein like
1969	3800.76	4668.48	3999.57	4431.29	2322.6	2484.7	2333.53	2449.98	3311.36	-0.79947	0.0820073	-9.74876	1.86738e-22	1.6973e-20	ENSG00000142627	EPHA2	EPH receptor A2
10388	1139.05	990.827	1069.99	944.52	1862.19	1932.92	1949.03	1713.37	1450.24	0.825854	0.0849635	9.7201	2.47541e-22	2.23724e-20	ENSG00000196074	SYCP2	synaptonemal complex protein 2
7474	4902.53	5145.04	4737.66	4641.51	2956.04	2939.83	2589.43	2418.54	3791.32	-0.814359	0.0838991	-9.70641	2.83134e-22	2.54455e-20	ENSG00000114251	WNT5A	Wnt family member 5A
79180	2367.38	2431.81	2512.48	2431.13	1423.28	1465.42	1494.26	1627.6	1969.17	-0.685099	0.0705868	-9.70576	2.84938e-22	2.54646e-20	ENSG00000142634	EFHD2	EF-hand domain family member D2
55890	129.505	78.248	143.655	78.0844	370.483	404.564	355.334	368.784	241.082	1.62416	0.16742	9.70115	2.98129e-22	2.64954e-20	ENSG00000170412	GPRC5C	G protein-coupled receptor class C group 5 member C
3772	45.1304	27.3396	31.7033	48.0519	126.101	184.301	180.319	207.739	106.336	1.90625	0.196552	9.69847	3.06056e-22	2.70496e-20	ENSG00000157551	KCNJ15	potassium voltage-gated channel subfamily J member 15
54751	3540.77	4118.39	3494.29	3835.14	2131.99	2182.4	2139.96	2335.63	2972.32	-0.754897	0.077929	-9.68698	3.42514e-22	3.01055e-20	ENSG00000162458	FBLIM1	filamin binding LIM protein 1
4213	712.275	624.098	581.557	578.125	276.64	289.937	224.072	305.89	449.074	-1.12906	0.116752	-9.67057	4.02135e-22	3.51527e-20	NA	MEIS3P1	Meis homeobox 3 pseudogene 1
2125	2308.52	2894.7	2149.88	2635.35	1290.33	1300.22	1250.3	1213.08	1880.3	-0.951962	0.0984655	-9.66797	4.1247e-22	3.58602e-20	ENSG00000167880	EVPL	envoplakin
25797	435.606	433.663	370.532	522.565	171.067	143.845	186.948	186.774	306.375	-1.27081	0.131471	-9.6661	4.20101e-22	3.63262e-20	ENSG00000115828	QPCT	glutaminyl-peptide cyclotransferase
7128	530.773	731.1	519.141	608.157	246.337	238.243	225.398	263.961	420.389	-1.22532	0.126827	-9.66131	4.40188e-22	3.78585e-20	ENSG00000118503	TNFAIP3	TNF alpha induced protein 3
22837	903.589	1000.25	787.628	827.394	380.258	449.515	449.471	429.771	653.485	-1.00921	0.104763	-9.63331	5.78369e-22	4.94768e-20	ENSG00000082438	COBLL1	cordon-bleu WH2 repeat protein like 1
89795	196.219	285.652	186.257	208.725	69.4044	55.0656	63.6419	50.5053	139.434	-1.67918	0.174491	-9.62328	6.37672e-22	5.42598e-20	ENSG00000067798	NAV3	neuron navigator 3
8706	313.951	364.843	311.088	384.415	118.281	144.969	149.824	141.987	241.17	-1.23645	0.128534	-9.6196	6.60846e-22	5.59342e-20	ENSG00000169255	B3GALNT1	beta-1,3-N-acetylgalactosaminyltransferase 1 (globoside blood group)
10367	1213.61	1063.42	1148.25	1144.24	1801.58	1860.99	1869.48	1875.37	1497.12	0.687412	0.0715493	9.60754	7.43012e-22	6.25577e-20	ENSG00000107745	MICU1	mitochondrial calcium uptake 1
58191	270.782	244.171	259.57	237.256	96.7751	76.4176	92.811	110.54	173.541	-1.32605	0.138819	-9.55237	1.26764e-21	1.06169e-19	ENSG00000161921	CXCL16	C-X-C motif chemokine ligand 16
4053	570.016	1185.5	641.991	911.485	202.348	212.396	263.849	198.209	523.225	-1.69787	0.178041	-9.53642	1.47845e-21	1.23181e-19	ENSG00000119681	LTBP2	latent transforming growth factor beta binding protein 2
55760	1116.49	1011.1	1121.5	973.051	1843.61	1890.21	2317.62	2287.98	1570.2	0.948661	0.0995353	9.5309	1.55922e-21	1.29238e-19	ENSG00000089876	DHX32	DEAH-box helicase 32 (putative)
1152	558.243	634.468	664.778	710.267	307.921	320.28	274.455	328.761	474.897	-1.01389	0.106791	-9.4941	2.22112e-21	1.83151e-19	ENSG00000166165	CKB	creatine kinase B
29767	88.2986	111.244	81.2396	93.1006	254.157	267.462	291.692	229.656	177.106	1.35539	0.143109	9.47101	2.7714e-21	2.27354e-19	ENSG00000128872	TMOD2	tropomodulin 2
155185	686.767	831.031	791.591	609.659	331.381	342.755	351.356	294.455	529.874	-1.10034	0.116215	-9.46812	2.84932e-21	2.32554e-19	ENSG00000174945	AMZ1	archaelysin family metallopeptidase 1
7162	752.5	709.417	757.906	690.746	391.988	395.573	400.413	430.724	566.159	-0.824882	0.0872899	-9.44992	3.39094e-21	2.75355e-19	ENSG00000146242	TPBG	trophoblast glycoprotein
64866	1711.03	2374.31	1820.96	1877.03	995.122	942.858	836.625	801.414	1419.92	-1.07449	0.113841	-9.43853	3.78063e-21	3.05448e-19	ENSG00000163814	CDCP1	CUB domain containing protein 1
4609	1601.15	1647.45	1581.2	1714.85	976.549	1013.66	847.232	985.329	1295.93	-0.756881	0.0802514	-9.43137	4.04776e-21	3.25387e-19	ENSG00000136997	MYC	MYC proto-oncogene, bHLH transcription factor
93664	62.7901	54.6793	74.3045	33.0357	2.93258	0	2.65174	3.81172	29.2757	-2.52431	0.267925	-9.42173	4.43718e-21	3.54908e-19	ENSG00000081803	CADPS2	calcium dependent secretion activator 2
30820	135.391	132.927	129.785	129.14	305.966	284.318	397.762	396.419	238.963	1.29841	0.137993	9.40924	4.99749e-21	3.97736e-19	ENSG00000182132	KCNIP1	potassium voltage-gated channel interacting protein 1
7037	6508.59	6498.35	6559.6	5929.91	3656.93	3818.63	4256.05	4015.65	5155.46	-0.68401	0.0727356	-9.40406	5.24973e-21	4.15742e-19	ENSG00000072274	TFRC	transferrin receptor
2581	2005.36	1956.2	1937.86	1889.04	1009.78	1118.17	1226.43	1204.5	1543.42	-0.757497	0.0808731	-9.3665	7.49772e-21	5.90843e-19	ENSG00000054983	GALC	galactosylceramidase
11322	327.686	330.904	353.69	315.341	135.876	148.34	92.811	141.034	230.71	-1.26491	0.135159	-9.35869	8.07318e-21	6.33072e-19	ENSG00000141524	TMC6	transmembrane channel like 6
3431	247.236	265.855	232.821	255.276	86.0223	89.903	102.092	113.399	174.075	-1.2703	0.135888	-9.34814	8.9199e-21	6.96057e-19	ENSG00000135899	SP110	SP110 nuclear body protein
124976	1397.08	1456.07	1444.48	1429.54	639.302	755.186	762.376	870.025	1094.26	-0.89228	0.0954993	-9.34332	9.33623e-21	7.25008e-19	ENSG00000183018	SPNS2	sphingolipid transporter 2
10561	99.0906	75.4197	91.1469	100.609	14.6629	14.6092	22.5398	12.3881	53.8082	-2.028	0.217157	-9.33885	9.73843e-21	7.52588e-19	ENSG00000137965	IFI44	interferon induced protein 44
338761	1323.5	1101.13	1292.9	1292.9	2271.77	2105.98	2125.37	2095.49	1701.13	0.765377	0.081995	9.33444	1.01523e-20	7.808e-19	ENSG00000186897	C1QL4	complement C1q like 4
3589	3300.4	3196.38	3734.05	3784.09	1985.36	2138.57	1974.22	2118.36	2778.93	-0.75225	0.0807025	-9.32128	1.14949e-20	8.79828e-19	ENSG00000095752	IL11	interleukin 11
79642	1248.93	1654.99	1296.86	1600.73	698.931	690.006	762.376	687.062	1079.99	-0.993337	0.106729	-9.30708	1.31398e-20	1.00094e-18	ENSG00000180801	ARSJ	arylsulfatase family member J
54509	802.536	855.071	892.645	836.404	397.853	419.173	258.545	366.878	603.638	-1.16219	0.125024	-9.29567	1.46285e-20	1.10906e-18	ENSG00000139725	RHOF	ras homolog family member F, filopodia associated
5587	136.372	124.443	129.785	97.6054	31.2808	29.2185	22.5398	34.3055	75.6938	-1.76784	0.190221	-9.29364	1.49101e-20	1.12508e-18	ENSG00000184304	PRKD1	protein kinase D1
2048	2409.57	3138.4	2660.1	2701.42	1556.22	1539.59	1372.28	1438.92	2102.06	-0.860445	0.0930444	-9.24768	2.29425e-20	1.72305e-18	ENSG00000133216	EPHB2	EPH receptor B2
2263	3.92438	0.942747	1.98145	0	27.3707	58.437	51.709	66.7051	26.3838	2.51471	0.272089	9.24225	2.41376e-20	1.80434e-18	ENSG00000066468	FGFR2	fibroblast growth factor receptor 2
4739	1011.51	1145.44	1127.45	1144.24	527.864	514.695	662.936	600.346	841.809	-0.912869	0.0989125	-9.22906	2.73019e-20	2.03139e-18	ENSG00000111859	NEDD9	neural precursor cell expressed, developmentally down-regulated 9
1593	199.162	198.92	213.997	247.768	82.1122	68.5511	75.5747	84.8107	146.362	-1.34402	0.145802	-9.21816	3.02241e-20	2.2384e-18	ENSG00000135929	CYP27A1	cytochrome P450 family 27 subfamily A member 1
56937	6181.88	6661.45	5563.92	5830.8	3920.86	3575.89	3589.14	3570.63	4861.82	-0.712041	0.077256	-9.21663	3.06574e-20	2.26003e-18	ENSG00000124225	PMEPA1	prostate transmembrane protein, androgen induced 1
11031	1684.54	1555.06	1602.01	1602.23	2584.58	2400.41	2614.62	2419.49	2057.87	0.627546	0.0681055	9.21431	3.1328e-20	2.29887e-18	ENSG00000168461	RAB31	RAB31, member RAS oncogene family
4982	142.259	189.492	169.414	186.201	44.9662	37.085	42.4279	63.8463	109.461	-1.63979	0.178241	-9.19983	3.58515e-20	2.6188e-18	ENSG00000164761	TNFRSF11B	TNF receptor superfamily member 11b
10893	2005.36	2233.84	1994.33	1917.57	3303.06	3117.39	3382.3	3434.36	2673.53	0.68435	0.0743964	9.19871	3.62281e-20	2.63428e-18	ENSG00000125966	MMP24	matrix metallopeptidase 24
5293	1276.41	1541.86	1424.67	1437.05	825.032	858.574	794.197	823.331	1122.64	-0.766069	0.0833724	-9.18853	3.98261e-20	2.8828e-18	ENSG00000171608	PIK3CD	phosphatidylinositol-4,5-bisphosphate 3-kinase catalytic subunit delta
404636	689.71	606.657	660.815	663.717	1083.1	1124.91	1062.02	1087.29	872.278	0.722711	0.0786654	9.18715	4.03403e-20	2.90686e-18	ENSG00000119979	FAM45A	family with sequence similarity 45 member A
5787	499.378	818.775	549.854	630.681	232.651	234.872	251.916	226.797	430.615	-1.30748	0.142502	-9.17522	4.50657e-20	3.23281e-18	ENSG00000127329	PTPRB	protein tyrosine phosphatase, receptor type B
1404	5945.44	6081.66	6250.5	6110.1	9004	9320.7	10656	10453.6	7977.76	0.680653	0.0742621	9.16555	4.92965e-20	3.50487e-18	ENSG00000145681	HAPLN1	hyaluronan and proteoglycan link protein 1
9242	445.417	412.452	486.447	476.014	204.303	219.139	214.791	241.091	337.457	-1.00117	0.109227	-9.16594	4.91173e-20	3.50487e-18	ENSG00000178860	MSC	musculin
64421	416.966	402.553	385.393	363.393	681.336	739.453	670.891	741.379	550.17	0.826061	0.0901567	9.16251	5.07062e-20	3.58915e-18	ENSG00000152457	DCLRE1C	DNA cross-link repair 1C
4688	346.327	361.072	335.856	482.021	142.719	158.454	157.779	148.657	266.611	-1.23809	0.135199	-9.15754	5.3092e-20	3.74146e-18	ENSG00000116701	NCF2	neutrophil cytosolic factor 2
4907	1441.23	1550.82	1494.02	1569.2	766.381	724.843	904.245	910.048	1170.1	-0.848715	0.0928463	-9.14108	6.18328e-20	4.32584e-18	ENSG00000135318	NT5E	5'-nucleotidase ecto
58494	103.015	121.614	115.915	97.6054	27.3707	28.0947	30.4951	21.9174	68.2535	-1.75485	0.191978	-9.14092	6.19252e-20	4.32584e-18	ENSG00000154721	JAM2	junctional adhesion molecule 2
347733	370.854	303.564	402.235	363.393	712.617	694.501	693.431	708.98	531.197	0.938517	0.102739	9.135	6.54097e-20	4.54938e-18	ENSG00000137285	TUBB2B	tubulin beta 2B class IIb
4942	2927.59	2659.49	2554.09	3025.77	4386.16	4456.94	4603.43	4761.79	3671.91	0.693432	0.0759731	9.12734	7.02043e-20	4.86173e-18	ENSG00000065154	OAT	ornithine aminotransferase
124359	244.293	419.994	221.923	303.328	79.1796	80.9127	88.8334	78.1402	189.575	-1.64706	0.180678	-9.116	7.79468e-20	5.37463e-18	ENSG00000166446	CDYL2	chromodomain Y like 2
3206	996.793	999.783	905.525	926.501	1663.75	1464.3	1595.02	1604.73	1269.55	0.708407	0.0777514	9.11118	8.14925e-20	5.595e-18	ENSG00000253293	HOXA10	homeobox A10
348938	170.711	332.79	142.665	300.324	37.146	48.3229	30.4951	48.5994	138.882	-2.01443	0.221115	-9.11032	8.21376e-20	5.61519e-18	ENSG00000172548	NIPAL4	NIPA like domain containing 4
114805	69.6578	60.8071	61.4251	40.5438	5.86516	4.49515	6.62936	4.76465	31.7735	-2.30581	0.253243	-9.10512	8.61681e-20	5.86567e-18	ENSG00000144278	GALNT13	polypeptide N-acetylgalactosaminyltransferase 13
4792	2150.56	1896.33	2075.57	2226.91	1138.82	1256.4	1129.64	1305.51	1647.47	-0.768237	0.0844339	-9.09868	9.14332e-20	6.1977e-18	ENSG00000100906	NFKBIA	NFKB inhibitor alpha
5452	127.542	200.805	146.628	154.667	43.9887	43.8277	30.4951	22.8703	96.353	-1.82529	0.200999	-9.0811	1.07479e-19	7.2546e-18	ENSG00000028277	POU2F2	POU class 2 homeobox 2
53340	351.232	292.723	332.884	334.862	597.269	591.113	636.419	676.58	476.635	0.907515	0.0999891	9.07614	1.12493e-19	7.56113e-18	ENSG00000064199	SPA17	sperm autoantigenic protein 17
23586	438.55	457.703	430.966	406.94	151.517	138.226	198.881	214.409	304.649	-1.22403	0.134945	-9.07056	1.18404e-19	7.92515e-18	ENSG00000107201	DDX58	DExD/H-box helicase 58
3229	4.90548	16.9694	9.90727	9.00973	66.4718	77.5414	102.092	95.293	47.7738	2.18544	0.241097	9.06457	1.25097e-19	8.33824e-18	ENSG00000123364	HOXC13	homeobox C13
57491	675.975	553.864	625.149	473.011	1207.25	1172.11	1264.88	1093.01	883.156	0.981062	0.108267	9.06151	1.28653e-19	8.53965e-18	ENSG00000063438	AHRR	aryl-hydrocarbon receptor repressor
8835	263.915	245.114	273.441	222.24	491.696	459.629	507.809	495.523	369.921	0.922427	0.101906	9.05172	1.40738e-19	9.30327e-18	ENSG00000120833	SOCS2	suppressor of cytokine signaling 2
38	1678.65	1350.01	1750.61	1548.17	2832.87	2803.85	3277.56	3468.66	2338.8	0.935316	0.103379	9.04748	1.46304e-19	9.63136e-18	ENSG00000075239	ACAT1	acetyl-CoA acetyltransferase 1
64399	252.142	395.954	296.227	393.425	115.348	114.626	121.98	92.4342	222.767	-1.44838	0.160276	-9.03683	1.61287e-19	1.05742e-17	ENSG00000164161	HHIP	hedgehog interacting protein
1889	3570.21	4556.29	3719.19	3718.02	2081.15	2064.4	2227.46	2292.75	3028.68	-0.822726	0.0912174	-9.0194	1.89131e-19	1.23491e-17	ENSG00000117298	ECE1	endothelin converting enzyme 1
389792	576.884	581.675	661.806	516.558	1028.36	1031.64	1207.87	1181.63	848.302	0.894933	0.0994543	8.99843	2.2897e-19	1.48895e-17	ENSG00000188483	IER5L	immediate early response 5 like
79669	1294.06	1201.06	1279.03	1324.43	700.887	770.919	775.635	809.99	1019.5	-0.720189	0.0801455	-8.98602	2.56348e-19	1.65967e-17	ENSG00000114529	C3orf52	chromosome 3 open reading frame 52
201799	309.045	410.566	309.107	318.344	130.989	110.131	148.498	138.175	234.357	-1.2676	0.14107	-8.98561	2.57297e-19	1.65967e-17	ENSG00000170006	TMEM154	transmembrane protein 154
266977	190.333	181.95	137.711	144.156	36.1685	43.8277	54.3607	53.3641	105.234	-1.60056	0.178883	-8.94756	3.63438e-19	2.33491e-17	ENSG00000153292	ADGRF1	adhesion G protein-coupled receptor F1
157695	343.383	319.591	305.144	334.862	159.337	159.578	153.801	132.457	238.519	-1.05454	0.117942	-8.94118	3.85035e-19	2.46376e-17	ENSG00000180190	TDRP	testis development related protein
958	1300.93	1140.25	1355.31	1309.41	664.718	684.387	621.834	782.355	982.401	-0.859526	0.0961985	-8.93492	4.07483e-19	2.59701e-17	ENSG00000101017	CD40	CD40 molecule
56034	2703.9	2657.6	2588.77	3001.74	1695.03	1762.1	1516.8	1657.14	2197.89	-0.706956	0.0791289	-8.93423	4.10023e-19	2.60283e-17	ENSG00000145431	PDGFC	platelet derived growth factor C
7272	2024.98	2115.52	2182.57	1890.54	3171.1	3188.19	3455.22	3164.68	2649.1	0.646515	0.0724961	8.91793	4.75083e-19	2.99425e-17	ENSG00000112742	TTK	TTK protein kinase
7185	312.969	329.49	291.274	300.324	66.4718	110.131	124.632	122.928	207.278	-1.41124	0.158249	-8.91785	4.75426e-19	2.99425e-17	ENSG00000056558	TRAF1	TNF receptor associated factor 1
101410538	1483.42	1348.13	1452.41	1223.82	2311.85	2219.48	2236.75	2252.73	1816.07	0.695899	0.0780727	8.91347	4.94588e-19	3.10272e-17	ENSG00000126005	MMP24OS	MMP24 opposite strand
64332	947.738	962.544	928.311	899.472	527.864	536.047	611.227	539.358	744.07	-0.742612	0.0834205	-8.90203	5.48344e-19	3.4265e-17	ENSG00000144802	NFKBIZ	NFKB inhibitor zeta
9760	137.353	149.897	146.628	114.123	39.1011	47.1991	39.7762	28.5879	87.8331	-1.61735	0.181761	-8.89823	5.6742e-19	3.53191e-17	ENSG00000198846	TOX	thymocyte selection associated high mobility group box
6288	334.554	241.814	276.413	417.451	94.8201	105.636	103.418	110.54	210.581	-1.45103	0.163087	-8.89728	5.72298e-19	3.54847e-17	ENSG00000173432	SAA1	serum amyloid A1
3090	296.291	304.978	287.311	243.263	73.3145	62.9321	90.1593	124.834	185.385	-1.51151	0.170091	-8.8865	6.30647e-19	3.89516e-17	ENSG00000177374	HIC1	HIC ZBTB transcriptional repressor 1
9435	298.253	331.847	322.977	321.347	120.236	142.721	125.958	165.81	228.644	-1.13062	0.127679	-8.85519	8.35387e-19	5.13988e-17	ENSG00000175040	CHST2	carbohydrate sulfotransferase 2
80830	319.837	374.742	282.357	237.256	93.8425	113.503	70.2712	113.399	200.651	-1.47379	0.166591	-8.84678	9.00845e-19	5.52139e-17	ENSG00000221963	APOL6	apolipoprotein L6
972	2663.67	2688.24	2784.93	2560.27	1336.28	1744.12	1296.7	1427.49	2062.71	-0.854711	0.0966622	-8.84224	9.38143e-19	5.72805e-17	ENSG00000019582	CD74	CD74 molecule
219	4153.96	5420.79	3953	5095	2267.86	2338.6	2438.28	2536.7	3525.52	-0.92391	0.104609	-8.832	1.02825e-18	6.25432e-17	ENSG00000137124	ALDH1B1	aldehyde dehydrogenase 1 family member B1
23507	89.2797	107.473	88.1747	94.6022	13.6854	25.8471	17.2363	23.8232	57.5152	-1.84642	0.209184	-8.82675	1.07764e-18	6.52991e-17	ENSG00000197147	LRRC8B	leucine rich repeat containing 8 VRAC subunit B
4940	749.557	1163.35	915.432	831.899	374.393	400.069	434.886	345.913	651.937	-1.16649	0.132332	-8.81489	1.19801e-18	7.2319e-17	ENSG00000111331	OAS3	2'-5'-oligoadenylate synthetase 3
3400	267.839	267.74	249.663	279.302	703.819	673.149	479.966	546.982	433.557	1.11391	0.126606	8.79824	1.38978e-18	8.35804e-17	ENSG00000172201	ID4	inhibitor of DNA binding 4, HLH protein
23635	160.9	117.843	168.424	121.631	316.719	337.136	384.503	365.925	246.635	1.21971	0.138638	8.79777	1.39566e-18	8.36193e-17	ENSG00000145687	SSBP2	single stranded DNA binding protein 2
87	19089.2	26933.3	19478.7	21509.2	11877.9	11303.1	10991.5	10608	16473.9	-0.923121	0.105009	-8.79087	1.48408e-18	8.85851e-17	ENSG00000072110	ACTN1	actinin alpha 1
9112	1565.83	1622.47	1498.97	1609.74	1015.65	939.487	994.404	1050.13	1287.08	-0.642782	0.0731677	-8.78506	1.56284e-18	9.29396e-17	ENSG00000182979	MTA1	metastasis associated 1
8613	65.7334	71.6487	37.6476	63.0681	187.685	191.044	186.948	184.868	123.58	1.47327	0.168123	8.763	1.90117e-18	1.12641e-16	ENSG00000162407	PLPP3	phospholipid phosphatase 3
84930	1332.33	1266.58	1281.01	1273.38	1967.76	2101.48	2443.58	2444.26	1763.8	0.776459	0.0887157	8.75222	2.09204e-18	1.23492e-16	ENSG00000120539	MASTL	microtubule associated serine/threonine kinase like
2118	387.533	357.772	412.142	361.891	174	184.301	125.958	182.01	273.201	-1.11523	0.127787	-8.72727	2.6089e-18	1.53436e-16	ENSG00000175832	ETV4	ETS variant 4
100133941	2069.13	1894.45	1975.51	2090.26	3342.16	3591.63	2920.9	3520.12	2675.52	0.721177	0.0830915	8.67931	3.98171e-18	2.33316e-16	ENSG00000272398	CD24	CD24 molecule
9200	349.27	320.062	353.69	408.441	661.785	645.054	624.486	675.627	504.802	0.849839	0.0981596	8.65773	4.81257e-18	2.80973e-16	ENSG00000165996	HACD1	3-hydroxyacyl-CoA dehydratase 1
3875	6125.96	6977.74	6228.7	7586.2	4067.49	4010.8	3882.15	4211.95	5386.37	-0.71784	0.0829428	-8.65463	4.94492e-18	2.87651e-16	ENSG00000111057	KRT18	keratin 18
65061	930.078	978.571	891.654	947.524	1472.15	1522.73	1842.96	1674.3	1282.5	0.774083	0.0895633	8.64286	5.4821e-18	3.17744e-16	ENSG00000138395	CDK15	cyclin dependent kinase 15
64761	472.888	493.999	479.512	453.49	225.809	222.51	243.96	281.114	359.16	-0.928653	0.107477	-8.6405	5.59656e-18	3.23206e-16	ENSG00000059378	PARP12	poly(ADP-ribose) polymerase family member 12
23516	4632.73	5018.71	4660.38	4611.48	3099.74	3278.09	3241.76	3311.43	3981.79	-0.543187	0.0628689	-8.63998	5.62209e-18	3.23513e-16	ENSG00000104635	SLC39A14	solute carrier family 39 member 14
1503	2663.67	2530.8	2567.96	2779.5	1771.28	1789.07	1720.98	1806.75	2203.75	-0.562709	0.065165	-8.63514	5.86561e-18	3.36316e-16	ENSG00000171793	CTPS1	CTP synthase 1
5371	752.5	924.834	747.999	810.876	410.561	474.239	389.806	379.266	611.26	-0.933601	0.108144	-8.63293	5.98002e-18	3.41652e-16	ENSG00000140464	PML	promyelocytic leukemia
3169	55.9224	145.183	51.5178	102.11	8.79774	1.12379	5.30349	8.57637	47.3169	-2.30798	0.267625	-8.62392	6.47018e-18	3.6834e-16	ENSG00000129514	FOXA1	forkhead box A1
114801	25.5085	57.5075	34.6754	43.547	0.977527	1.12379	1.32587	0	20.5832	-2.37493	0.276029	-8.60392	7.70363e-18	4.37003e-16	ENSG00000164484	TMEM200A	transmembrane protein 200A
440193	82.412	96.1601	83.2211	49.5535	10.7528	12.3617	13.2587	13.341	45.1326	-2.01909	0.234765	-8.60045	7.9402e-18	4.48832e-16	ENSG00000015133	CCDC88C	coiled-coil domain containing 88C
6924	1938.64	2151.82	1919.04	1863.51	1205.29	1305.84	1170.74	1231.18	1598.26	-0.668788	0.0777903	-8.59732	8.15982e-18	4.59622e-16	ENSG00000011007	ELOA	elongin A
23141	4325.65	4663.3	4125.39	4450.81	2929.65	2909.49	3021.66	3008.4	3679.29	-0.558288	0.0650053	-8.58836	8.82213e-18	4.95185e-16	ENSG00000176915	ANKLE2	ankyrin repeat and LEM domain containing 2
256691	228.595	390.297	203.099	367.897	54.7415	59.5608	82.2041	91.4812	184.735	-1.7285	0.201407	-8.58213	9.31312e-18	5.20916e-16	ENSG00000165072	MAMDC2	MAM domain containing 2
200734	740.727	884.768	693.509	731.29	428.157	413.554	371.244	372.595	579.48	-0.911688	0.106364	-8.57136	1.02271e-17	5.70043e-16	ENSG00000198369	SPRED2	sprouty related EVH1 domain containing 2
55072	1024.26	1028.07	994.69	928.003	624.639	610.217	631.115	623.216	808.026	-0.665239	0.0776655	-8.56544	1.07669e-17	5.98047e-16	ENSG00000092098	RNF31	ring finger protein 31
51477	268.82	260.669	282.357	316.842	124.146	134.855	124.632	131.504	205.478	-1.06265	0.124273	-8.55098	1.2205e-17	6.75583e-16	ENSG00000105655	ISYNA1	inositol-3-phosphate synthase 1
8542	727.973	690.562	763.851	797.361	405.673	418.049	298.321	328.761	553.819	-0.986731	0.115432	-8.54818	1.25041e-17	6.89754e-16	ENSG00000100342	APOL1	apolipoprotein L1
6229	21169.1	16605.5	21712.8	22345.6	35884	37824.5	45811.5	49121.6	31309.3	0.995433	0.116611	8.53634	1.38545e-17	7.61614e-16	ENSG00000138326	RPS24	ribosomal protein S24
79974	174.635	290.366	206.071	204.221	67.4493	58.437	83.5299	61.9404	143.331	-1.51015	0.177263	-8.5193	1.60526e-17	8.7943e-16	ENSG00000106034	CPED1	cadherin like and PC-esterase domain containing 1
1690	1040.94	924.363	1057.11	929.504	552.302	552.904	599.294	609.875	783.286	-0.751937	0.0883611	-8.50982	1.74205e-17	9.50386e-16	ENSG00000100473	COCH	cochlin
22871	99.0906	139.526	98.082	115.625	32.2584	30.3423	27.8433	19.0586	70.2283	-1.72775	0.203037	-8.50951	1.74666e-17	9.50386e-16	ENSG00000169760	NLGN1	neuroligin 1
2348	28.4518	41.0095	40.6198	37.5406	118.281	159.578	106.07	149.61	85.145	1.6003	0.188288	8.49922	1.90874e-17	1.03506e-15	ENSG00000110195	FOLR1	folate receptor 1
9056	366.93	390.768	333.875	384.415	168.135	201.158	155.127	183.915	273.04	-1.00724	0.118529	-8.49777	1.93264e-17	1.04447e-15	ENSG00000155465	SLC7A7	solute carrier family 7 member 7
10620	459.153	553.864	480.503	507.548	239.494	270.833	233.353	278.255	377.875	-0.931289	0.109676	-8.49125	2.04429e-17	1.10109e-15	ENSG00000179361	ARID3B	AT-rich interaction domain 3B
7057	140204	199904	128989	162944	71282.2	71531.4	45118.1	46844.1	108352	-1.30916	0.154208	-8.48961	2.07336e-17	1.11301e-15	ENSG00000137801	THBS1	thrombospondin 1
51076	331.61	282.824	370.532	406.94	729.235	719.224	641.722	728.991	526.385	0.985194	0.116104	8.48548	2.14826e-17	1.14935e-15	ENSG00000119929	CUTC	cutC copper transporter
1763	894.759	854.6	935.246	876.947	1310.86	1445.19	1430.62	1378.89	1140.89	0.632634	0.0745763	8.48304	2.19378e-17	1.1698e-15	ENSG00000138346	DNA2	DNA replication helicase/nuclease 2
1643	900.646	851.3	844.099	845.413	1340.19	1359.78	1589.72	1628.56	1169.96	0.760829	0.0897059	8.48138	2.22547e-17	1.18275e-15	ENSG00000134574	DDB2	damage specific DNA binding protein 2
55601	326.705	297.908	261.552	243.263	123.168	115.75	132.587	100.058	200.124	-1.18527	0.140101	-8.46012	2.67112e-17	1.4149e-15	ENSG00000137628	DDX60	DExD/H-box helicase 60
23548	573.941	545.85	643.973	483.522	950.156	1041.75	1003.69	1027.26	783.767	0.810967	0.0961775	8.43198	3.39874e-17	1.79438e-15	ENSG00000113638	TTC33	tetratricopeptide repeat domain 33
375033	175.616	198.448	176.349	175.69	59.6291	75.2938	75.5747	75.2814	126.485	-1.25039	0.149009	-8.39141	4.80354e-17	2.52771e-15	ENSG00000187800	PEAR1	platelet endothelial aggregation receptor 1
7075	63.7712	92.3892	72.3231	108.117	12.7078	13.4855	14.5846	20.0115	49.6737	-1.90993	0.227727	-8.3869	4.99116e-17	2.61782e-15	ENSG00000066056	TIE1	tyrosine kinase with immunoglobulin like and EGF like domains 1
509	3653.6	2605.28	3901.48	3693.99	6362.72	6789.93	7641	8025.57	5334.2	1.00604	0.120088	8.37749	5.40676e-17	2.82653e-15	ENSG00000165629	ATP5F1C	ATP synthase F1 subunit gamma
10371	328.667	406.795	368.55	328.855	191.595	141.597	157.779	152.469	259.538	-1.09187	0.130477	-8.36831	5.84528e-17	3.04583e-15	ENSG00000075213	SEMA3A	semaphorin 3A
54739	43.1682	84.8472	49.5364	69.0746	4.88763	7.86652	9.2811	3.81172	34.0592	-2.15889	0.25812	-8.3639	6.06801e-17	3.15162e-15	ENSG00000132530	XAF1	XIAP associated factor 1
27237	97.1284	99.4598	116.906	78.0844	15.6404	26.9709	22.5398	26.682	60.4264	-1.74016	0.20815	-8.36009	6.26698e-17	3.24443e-15	ENSG00000130762	ARHGEF16	Rho guanine nucleotide exchange factor 16
5641	1339.2	1224.63	1321.63	1319.93	761.493	869.812	715.971	802.367	1044.38	-0.705281	0.0843789	-8.3585	6.35188e-17	3.27203e-15	ENSG00000100600	LGMN	legumain
59274	1134.15	1206.24	1175	1049.63	714.572	675.397	632.441	732.803	915.03	-0.711958	0.0851795	-8.35833	6.36121e-17	3.27203e-15	ENSG00000140406	TLNRD1	talin rod domain containing 1
1837	176.597	210.232	180.312	186.201	68.4269	65.1797	80.8782	81.9519	131.222	-1.24769	0.149318	-8.35592	6.49244e-17	3.32883e-15	ENSG00000134769	DTNA	dystrobrevin alpha
7102	63.7712	84.8472	63.4065	85.5925	19.5505	7.86652	9.2811	6.67051	42.6233	-2.02071	0.241957	-8.3515	6.73988e-17	3.44466e-15	ENSG00000156298	TSPAN7	tetraspanin 7
3725	3419.12	3680.95	3716.22	3887.7	2384.19	2510.54	2175.76	2425.21	3024.96	-0.618423	0.0740875	-8.34719	6.9906e-17	3.56142e-15	ENSG00000177606	JUN	Jun proto-oncogene, AP-1 transcription factor subunit
81855	817.252	843.758	839.146	765.827	1228.75	1278.87	1372.28	1264.54	1051.3	0.638385	0.0765122	8.34357	7.2079e-17	3.66047e-15	ENSG00000107819	SFXN3	sideroflexin 3
55966	337.497	245.114	381.43	199.716	692.089	786.652	778.287	946.259	545.88	1.32747	0.159116	8.34274	7.25897e-17	3.67474e-15	ENSG00000196581	AJAP1	adherens junctions associated protein 1
79711	1630.58	1772.83	1660.46	1716.35	1092.87	1103.56	1081.91	1179.73	1404.79	-0.594864	0.071316	-8.34125	7.35096e-17	3.70957e-15	ENSG00000196497	IPO4	importin 4
403	1503.04	1104.9	1477.17	1361.97	2522.02	2446.49	2361.38	2508.11	1910.63	0.827601	0.0992305	8.34019	7.41711e-17	3.73118e-15	ENSG00000138175	ARL3	ADP ribosylation factor like GTPase 3
92906	151.089	200.334	179.322	208.725	356.797	420.297	389.806	386.889	286.657	1.01697	0.121963	8.33838	7.53151e-17	3.77685e-15	ENSG00000143889	HNRNPLL	heterogeneous nuclear ribonucleoprotein L like
23780	1061.55	1063.89	1024.41	1193.79	674.493	664.159	558.192	622.263	857.843	-0.760015	0.0912304	-8.33072	8.0355e-17	4.017e-15	ENSG00000128335	APOL2	apolipoprotein L2
55872	2345.8	1835.06	2226.16	2174.35	3536.69	3447.78	3581.18	3562.05	2838.63	0.704102	0.0846077	8.32196	8.65193e-17	4.31168e-15	ENSG00000168078	PBK	PDZ binding kinase
57685	286.48	368.143	265.515	319.846	122.191	152.835	120.654	116.257	218.99	-1.19129	0.143163	-8.32126	8.70333e-17	4.32383e-15	ENSG00000158966	CACHD1	cache domain containing 1
9474	1277.39	1109.61	1251.29	1271.87	1914	1950.9	1849.59	1895.38	1565	0.624148	0.0750215	8.3196	8.82608e-17	4.37123e-15	ENSG00000057663	ATG5	autophagy related 5
440482	48.0737	34.4102	41.6105	21.0227	141.741	131.483	119.328	119.116	82.0983	1.55902	0.18767	8.30722	9.79669e-17	4.83697e-15	NA	ANKRD20A5P	ankyrin repeat domain 20 family member A5, pseudogene
139818	165.805	179.593	162.479	166.68	325.516	311.289	351.356	329.714	249.054	0.918362	0.110944	8.27773	1.2555e-16	6.17979e-15	ENSG00000147251	DOCK11	dedicator of cytokinesis 11
29995	3100.26	3023.39	3149.52	3112.86	1739.02	1921.68	1915.88	2177.44	2517.51	-0.660994	0.079865	-8.27639	1.26962e-16	6.2301e-15	ENSG00000071282	LMCD1	LIM and cysteine rich domains 1
56833	34.3383	27.3396	32.694	37.5406	0	0	1.32587	1.90586	16.893	-2.28082	0.275803	-8.26973	1.34259e-16	6.56802e-15	ENSG00000158714	SLAMF8	SLAM family member 8
64750	1400.02	1543.28	1294.88	1407.02	893.459	874.307	894.964	876.695	1148.08	-0.661592	0.0800375	-8.26602	1.3851e-16	6.7553e-15	ENSG00000108854	SMURF2	SMAD specific E3 ubiquitin protein ligase 2
3831	2847.14	2772.15	2655.15	2683.4	1828.95	1835.15	1966.27	1908.72	2312.11	-0.533163	0.0645976	-8.2536	1.53697e-16	7.45304e-15	ENSG00000126214	KLC1	kinesin light chain 1
79729	70.6389	78.7193	92.1376	99.1071	21.5056	20.2282	18.5622	17.1527	52.2564	-1.74198	0.211059	-8.25356	1.53748e-16	7.45304e-15	ENSG00000214193	SH3D21	SH3 domain containing 21
29775	1423.57	1553.17	1484.11	1503.12	2224.85	2108.23	2364.03	2340.39	1875.18	0.588604	0.0713802	8.24604	1.6373e-16	7.91297e-15	ENSG00000100065	CARD10	caspase recruitment domain family member 10
3422	1884.68	1701.66	1946.78	1878.53	2822.12	2852.17	2737.93	2703.46	2315.92	0.577337	0.0700299	8.24415	1.66344e-16	8.01509e-15	ENSG00000067064	IDI1	isopentenyl-diphosphate delta isomerase 1
1983	9027.06	9200.73	8171.52	8623.82	6067.51	6151.62	5689.32	6043.48	7371.88	-0.540607	0.0655795	-8.24354	1.6719e-16	8.03164e-15	ENSG00000100664	EIF5	eukaryotic translation initiation factor 5
311	3003.13	3065.81	3120.79	3123.37	4250.29	4173.75	4344.88	4460.66	3692.84	0.479731	0.0582038	8.24227	1.68975e-16	8.0931e-15	ENSG00000122359	ANXA11	annexin A11
23225	987.963	1161.46	1035.31	899.472	502.449	598.979	534.326	590.816	788.847	-0.848349	0.102937	-8.24145	1.70135e-16	8.12431e-15	ENSG00000132182	NUP210	nucleoporin 210
147947	41.206	80.6048	40.6198	96.1038	4.88763	3.37136	5.30349	7.62344	34.965	-2.18627	0.265459	-8.2358	1.78366e-16	8.49203e-15	ENSG00000240225	ZNF542P	zinc finger protein 542, pseudogene
771	531.754	794.264	600.381	707.264	290.325	286.566	331.468	307.796	481.227	-1.05565	0.128262	-8.23041	1.8658e-16	8.85672e-15	ENSG00000074410	CA12	carbonic anhydrase 12
4293	386.552	510.969	457.716	394.927	186.708	192.168	237.331	170.574	317.118	-1.09497	0.133099	-8.22678	1.92313e-16	9.10184e-15	ENSG00000006432	MAP3K9	mitogen-activated protein kinase kinase kinase 9
399726	62.7901	53.7366	76.286	60.0649	203.326	165.197	147.172	191.539	120.014	1.35413	0.164688	8.22237	1.99513e-16	9.3871e-15	ENSG00000204682	CASC10	cancer susceptibility 10
58504	374.778	383.226	329.912	405.438	205.281	186.549	169.712	183.915	279.851	-0.951778	0.115753	-8.22251	1.99292e-16	9.3871e-15	ENSG00000128805	ARHGAP22	Rho GTPase activating protein 22
5223	13057.4	12395.2	13440.2	12757.8	17513.4	18447	17717.6	18811.8	15517.5	0.483628	0.0588382	8.21963	2.04127e-16	9.576e-15	ENSG00000171314	PGAM1	phosphoglycerate mutase 1
3690	2454.7	3620.62	2538.24	2781	1505.39	1451.93	1241.02	1174.96	2095.98	-1.02761	0.125109	-8.21368	2.14517e-16	1.0034e-14	ENSG00000259207	ITGB3	integrin subunit beta 3
92565	50.0359	43.8377	56.4714	33.0357	144.674	124.74	133.913	146.751	91.6824	1.40529	0.171176	8.20958	2.21956e-16	1.03517e-14	ENSG00000203780	FANK1	fibronectin type III and ankyrin repeat domains 1
139065	38.2627	38.6526	31.7033	39.0422	0	3.37136	3.97762	0	19.3762	-2.24039	0.272966	-8.20757	2.25701e-16	1.04957e-14	ENSG00000179542	SLITRK4	SLIT and NTRK like family member 4
7453	2872.65	3034.23	2907.78	3108.36	1917.91	1927.3	2145.26	2014.49	2491	-0.566195	0.0690931	-8.19467	2.51282e-16	1.16515e-14	ENSG00000140105	WARS	tryptophanyl-tRNA synthetase
6641	385.57	457.703	299.2	355.884	159.337	173.063	153.801	160.092	268.081	-1.13826	0.139134	-8.18104	2.81401e-16	1.30103e-14	ENSG00000172164	SNTB1	syntrophin beta 1
51363	25.5085	47.6087	21.796	36.0389	0	0	0	0	16.369	-2.27421	0.278386	-8.16929	3.10219e-16	1.43014e-14	ENSG00000182022	CHST15	carbohydrate sulfotransferase 15
22822	904.57	982.813	899.58	875.446	516.134	605.722	479.966	499.335	720.446	-0.779599	0.0955109	-8.16241	3.28392e-16	1.50957e-14	ENSG00000139289	PHLDA1	pleckstrin homology like domain family A member 1
7422	1143.96	1371.22	1202.74	1214.81	720.437	738.329	792.871	753.767	992.268	-0.701077	0.0859474	-8.15705	3.43308e-16	1.57361e-14	ENSG00000112715	VEGFA	vascular endothelial growth factor A
10690	41.206	41.9522	48.5456	31.5341	0.977527	0	2.65174	5.71758	21.5731	-2.21092	0.271059	-8.1566	3.44598e-16	1.57501e-14	ENSG00000172461	FUT9	fucosyltransferase 9
4045	198.181	226.731	164.461	211.729	87.9774	74.17	75.5747	75.2814	139.263	-1.24533	0.152865	-8.14664	3.74175e-16	1.70532e-14	ENSG00000185565	LSAMP	limbic system associated membrane protein
91584	24.5274	25.4542	25.7589	19.5211	111.438	102.265	100.766	70.5168	60.0309	1.66438	0.204455	8.14057	3.9341e-16	1.78789e-14	ENSG00000221866	PLXNA4	plexin A4
55959	13.7353	12.2557	12.8795	18.0195	88.9549	55.0656	71.5971	67.658	42.5207	1.84532	0.226797	8.13642	4.07121e-16	1.84496e-14	ENSG00000196562	SULF2	sulfatase 2
11164	1796.39	1508.39	1814.02	1753.89	2752.71	2582.46	2816.15	2783.51	2225.94	0.657832	0.0809164	8.12978	4.30077e-16	1.94349e-14	ENSG00000165609	NUDT5	nudix hydrolase 5
81691	407.155	347.873	360.625	304.829	677.426	596.731	704.038	750.908	518.698	0.899752	0.110686	8.12885	4.33366e-16	1.95283e-14	ENSG00000005189	REXO5	RNA exonuclease 5
219736	58.8657	47.6087	41.6105	52.5568	133.921	125.864	182.97	169.621	101.627	1.43096	0.176262	8.11834	4.7259e-16	2.1236e-14	ENSG00000165730	STOX1	storkhead box 1
83540	1545.23	1356.61	1577.24	1636.77	2494.65	2515.04	2365.36	2308	1974.86	0.652178	0.0803788	8.11381	4.90582e-16	2.19828e-14	ENSG00000143228	NUF2	NDC80 kinetochore complex component NUF2
84858	461.115	625.984	518.15	561.607	1209.2	1087.83	1069.98	911.954	805.727	0.934515	0.115325	8.10329	5.34927e-16	2.39029e-14	ENSG00000165655	ZNF503	zinc finger protein 503
148252	123.618	114.544	118.887	108.117	314.764	267.462	265.174	221.08	191.706	1.11789	0.138129	8.09308	5.81732e-16	2.59219e-14	ENSG00000176490	DIRAS1	DIRAS family GTPase 1
57662	132.448	147.54	136.72	132.143	37.146	42.7039	23.8657	56.2228	88.5987	-1.52644	0.188776	-8.08596	6.16764e-16	2.74066e-14	ENSG00000076826	CAMSAP3	calmodulin regulated spectrin associated protein family member 3
375790	19600.3	24691	20420.9	22311.1	13578.8	13611.3	11460.8	11435.2	17138.7	-0.77276	0.0957329	-8.07204	6.91328e-16	3.06348e-14	ENSG00000188157	AGRN	agrin
23705	2616.58	2710.87	2605.61	2347.04	3659.86	3962.48	3849.01	3845.07	3199.56	0.563861	0.0698789	8.06912	7.08083e-16	3.12906e-14	ENSG00000182985	CADM1	cell adhesion molecule 1
25890	47.0926	71.6487	68.3602	46.5503	192.573	146.092	224.072	177.245	121.704	1.44074	0.178681	8.0632	7.43216e-16	3.27264e-14	ENSG00000154175	ABI3BP	ABI family member 3 binding protein
151636	491.529	646.253	521.122	570.616	274.685	295.556	249.264	200.115	406.143	-1.06507	0.132094	-8.06296	7.44664e-16	3.27264e-14	ENSG00000163840	DTX3L	deltex E3 ubiquitin ligase 3L
84570	23.5463	78.7193	42.6013	48.0519	0	1.12379	1.32587	3.81172	24.8975	-2.23131	0.276752	-8.06249	7.4757e-16	3.27641e-14	ENSG00000188517	COL25A1	collagen type XXV alpha 1 chain
347902	11071.7	13567.5	10551.2	13317.9	6524.01	6778.69	6879.95	7621.53	9539.06	-0.778025	0.0965318	-8.05978	7.6435e-16	3.34079e-14	ENSG00000139211	AMIGO2	adhesion molecule with Ig like domain 2
5947	146.183	137.17	138.702	192.208	56.6965	57.3132	38.4503	44.7877	101.439	-1.43011	0.177632	-8.05098	8.21337e-16	3.58009e-14	ENSG00000114115	RBP1	retinol binding protein 1
7518	416.966	350.702	368.55	343.872	634.415	619.207	649.677	713.744	512.142	0.795991	0.0988828	8.04984	8.29014e-16	3.60373e-14	ENSG00000152422	XRCC4	X-ray repair cross complementing 4
9353	158.937	222.96	187.247	163.677	61.5842	62.9321	43.7538	76.2344	122.166	-1.40535	0.174839	-8.03798	9.13312e-16	3.95942e-14	ENSG00000145147	SLIT2	slit guidance ligand 2
9636	786.839	569.419	827.257	924.999	361.685	375.345	302.299	294.455	555.287	-1.13132	0.140822	-8.03367	9.4602e-16	4.09013e-14	ENSG00000187608	ISG15	ISG15 ubiquitin-like modifier
5745	56.9035	51.3797	57.4622	43.547	144.674	123.617	148.498	166.763	99.1054	1.32724	0.165252	8.03157	9.62312e-16	4.14935e-14	ENSG00000160801	PTH1R	parathyroid hormone 1 receptor
29015	822.158	927.191	843.109	908.481	473.123	498.962	491.898	576.522	692.681	-0.755253	0.0940729	-8.02838	9.87694e-16	4.24735e-14	ENSG00000134802	SLC43A3	solute carrier family 43 member 3
207	4149.05	4553.94	4367.12	4399.75	2990.25	2962.31	2932.83	3210.42	3695.71	-0.522942	0.0652305	-8.01683	1.08508e-15	4.65362e-14	ENSG00000142208	AKT1	AKT serine/threonine kinase 1
8036	1164.56	1370.75	1141.32	1139.73	1970.69	1891.34	1966.27	1904.91	1568.7	0.663407	0.0827582	8.0162	1.09065e-15	4.66502e-14	ENSG00000108061	SHOC2	SHOC2, leucine rich repeat scaffold protein
2247	2534.17	2721.71	2362.88	2238.92	1543.51	1639.61	1479.67	1536.12	2007.07	-0.656376	0.0820043	-8.00416	1.2028e-15	5.13101e-14	ENSG00000138685	FGF2	fibroblast growth factor 2
8974	3222.9	2803.73	3230.76	3162.42	1773.23	2089.12	1709.05	1969.71	2495.11	-0.700226	0.0875609	-7.99702	1.27466e-15	5.42306e-14	ENSG00000072682	P4HA2	prolyl 4-hydroxylase subunit alpha 2
55680	759.368	815.476	756.915	641.193	1212.13	1188.97	1324.55	1282.64	997.655	0.725013	0.090704	7.99317	1.31513e-15	5.58042e-14	ENSG00000204130	RUFY2	RUN and FYVE domain containing 2
79228	318.856	273.396	320.996	318.344	715.549	618.083	580.732	516.488	457.806	0.941011	0.117755	7.99125	1.33582e-15	5.63828e-14	ENSG00000131652	THOC6	THO complex 6
337876	77.5065	123.028	74.3045	138.149	16.618	12.3617	23.8657	24.7762	61.3263	-1.85259	0.231826	-7.99132	1.33505e-15	5.63828e-14	ENSG00000198108	CHSY3	chondroitin sulfate synthase 3
4601	317.875	349.759	320.005	343.872	545.46	561.894	666.914	669.909	471.961	0.841579	0.105358	7.98782	1.37349e-15	5.78202e-14	ENSG00000119950	MXI1	MAX interactor 1, dimerization protein
347735	1009.55	1278.36	1163.11	1246.35	670.583	688.882	615.205	717.556	923.7	-0.776884	0.0972928	-7.98501	1.40506e-15	5.89943e-14	ENSG00000168528	SERINC2	serine incorporator 2
55930	589.638	698.104	558.77	567.613	300.101	349.498	338.097	305.89	463.464	-0.872046	0.109254	-7.98186	1.44148e-15	6.03646e-14	ENSG00000128833	MYO5C	myosin VC
10021	26.4896	19.7977	24.7682	30.0324	89.9324	82.0365	87.5075	96.2459	57.1013	1.58072	0.198108	7.97908	1.47427e-15	6.15769e-14	ENSG00000138622	HCN4	hyperpolarization activated cyclic nucleotide gated potassium channel 4
8795	2124.07	2437	2229.14	2447.64	1314.77	1411.48	1512.82	1536.12	1876.63	-0.662497	0.0834361	-7.94017	2.01912e-15	8.41144e-14	ENSG00000120889	TNFRSF10B	TNF receptor superfamily member 10b
9123	7627.04	8085.47	8774.87	9434.69	5581.68	5367.21	5249.13	5559.39	6959.93	-0.626827	0.0790766	-7.92684	2.24796e-15	9.34044e-14	ENSG00000141526	SLC16A3	solute carrier family 16 member 3
7849	3304.33	3793.61	3382.34	3582.87	2189.66	2291.4	2116.09	2462.37	2890.33	-0.621526	0.0784444	-7.92314	2.31587e-15	9.59764e-14	ENSG00000125618	PAX8	paired box 8
9780	3672.24	5072.92	3792.5	4344.19	2332.38	2427.38	2391.87	2079.29	3264.1	-0.839118	0.105943	-7.9205	2.36566e-15	9.77867e-14	ENSG00000103335	PIEZO1	piezo type mechanosensitive ion channel component 1
80020	239.387	465.717	231.83	366.396	75.2695	121.369	60.9901	62.8933	202.982	-1.6712	0.211007	-7.92012	2.37288e-15	9.78323e-14	ENSG00000100350	FOXRED2	FAD dependent oxidoreductase domain containing 2
2004	2124.07	2210.74	2009.19	2085.75	1485.84	1435.08	1302.01	1363.64	1752.04	-0.583137	0.0736544	-7.9172	2.42925e-15	9.98991e-14	ENSG00000111145	ELK3	ELK3, ETS transcription factor
2746	4869.18	4575.62	4808.99	4402.76	6415.51	6491	6691.68	6816.3	5633.88	0.494859	0.0625837	7.90715	2.63354e-15	1.08023e-13	ENSG00000148672	GLUD1	glutamate dehydrogenase 1
10734	123.618	123.5	97.0913	136.648	39.1011	42.7039	38.4503	27.635	78.5934	-1.47943	0.187256	-7.90055	2.77665e-15	1.13601e-13	ENSG00000066923	STAG3	stromal antigen 3
2123	19.6219	23.5687	23.7774	16.5178	73.3145	71.9224	110.047	100.058	54.8535	1.6815	0.212842	7.90021	2.78425e-15	1.13621e-13	ENSG00000126860	EVI2A	ecotropic viral integration site 2A
83882	96.1473	88.6182	71.3323	96.1038	195.505	197.787	234.679	196.303	147.06	1.13896	0.144206	7.89817	2.83037e-15	1.14931e-13	ENSG00000182612	TSPAN10	tetraspanin 10
5264	372.816	314.406	385.393	301.826	636.37	613.588	684.15	819.519	516.009	0.95317	0.120683	7.89815	2.83072e-15	1.14931e-13	ENSG00000107537	PHYH	phytanoyl-CoA 2-hydroxylase
7582	822.158	810.762	746.017	698.254	1199.43	1262.01	1534.03	1409.38	1060.26	0.781843	0.0991177	7.88803	3.06994e-15	1.24329e-13	ENSG00000196693	ZNF33B	zinc finger protein 33B
90161	10.792	4.24236	12.8795	6.00649	89.9324	42.7039	76.9006	58.1287	37.6983	2.0248	0.257	7.87862	3.31012e-15	1.33717e-13	ENSG00000171004	HS6ST2	heparan sulfate 6-O-sulfotransferase 2
80195	566.092	493.056	506.262	554.099	815.257	848.46	900.267	936.73	702.528	0.708941	0.0901064	7.86782	3.60866e-15	1.4541e-13	ENSG00000133678	TMEM254	transmembrane protein 254
11130	3470.13	2927.23	3556.71	3078.33	4923.8	4982.88	5332.66	5294.48	4195.78	0.641835	0.0815884	7.86675	3.63976e-15	1.46295e-13	ENSG00000122952	ZWINT	ZW10 interacting kinetochore protein
3976	2444.89	2986.15	2921.65	2956.69	1555.24	1551.95	1815.12	1794.37	2253.26	-0.730601	0.0929005	-7.86433	3.71066e-15	1.4877e-13	ENSG00000128342	LIF	LIF, interleukin 6 family cytokine
1879	6.86767	6.59923	9.90727	4.50487	69.4044	51.6942	57.0125	35.2584	30.1561	1.99301	0.253851	7.85113	4.123e-15	1.6485e-13	ENSG00000164330	EBF1	EBF transcription factor 1
1847	588.657	620.327	588.492	734.293	334.314	370.85	347.378	361.16	493.184	-0.806315	0.102704	-7.85085	4.13233e-15	1.6485e-13	ENSG00000138166	DUSP5	dual specificity phosphatase 5
54780	814.309	681.606	695.49	755.316	1148.59	1162	1172.07	1191.16	952.568	0.653762	0.0834119	7.83775	4.58681e-15	1.82525e-13	ENSG00000107672	NSMCE4A	NSE4 homolog A, SMC5-SMC6 complex component
4634	34.3383	21.6832	24.7682	28.5308	85.0448	97.7696	90.1593	104.822	60.8896	1.5475	0.197478	7.83631	4.63997e-15	1.84183e-13	ENSG00000160808	MYL3	myosin light chain 3
85441	951.663	1127.52	964.968	839.407	537.64	559.646	478.64	414.524	734.252	-0.923258	0.117864	-7.83325	4.75399e-15	1.87777e-13	ENSG00000130589	HELZ2	helicase with zinc finger 2
5649	26.4896	28.2824	25.7589	22.5243	0	0	0	0	12.8819	-2.181	0.278418	-7.83356	4.74239e-15	1.87777e-13	ENSG00000189056	RELN	reelin
10395	6494.85	7964.79	6183.13	6320.33	4175.02	4149.03	3970.99	3606.84	5358.12	-0.740001	0.0944962	-7.83101	4.83959e-15	1.90687e-13	ENSG00000164741	DLC1	DLC1 Rho GTPase activating protein
8837	2177.05	2682.11	2120.16	2090.26	1301.09	1387.88	1385.54	1278.83	1802.86	-0.740842	0.0946307	-7.82877	4.92647e-15	1.93633e-13	ENSG00000003402	CFLAR	CASP8 and FADD like apoptosis regulator
5924	565.111	814.533	603.353	608.157	259.045	334.889	303.625	321.137	476.231	-1.02932	0.131563	-7.82381	5.12484e-15	2.00937e-13	ENSG00000113319	RASGRF2	Ras protein specific guanine nucleotide releasing factor 2
143279	412.06	364.372	348.736	399.432	626.594	616.96	643.048	652.757	507.995	0.720094	0.092061	7.82192	5.2022e-15	2.03471e-13	ENSG00000165338	HECTD2	HECT domain E3 ubiquitin protein ligase 2
375449	92.223	120.672	125.822	97.6054	37.146	35.9612	30.4951	27.635	70.9449	-1.49809	0.192	-7.80253	6.06775e-15	2.36746e-13	ENSG00000069020	MAST4	microtubule associated serine/threonine kinase family member 4
1917	291.385	271.511	249.663	282.305	549.37	515.819	428.257	540.311	391.078	0.861383	0.110517	7.79409	6.48737e-15	2.52502e-13	ENSG00000101210	EEF1A2	eukaryotic translation elongation factor 1 alpha 2
10970	6299.61	7357.19	5925.54	6943.5	4276.68	4153.52	4240.14	4366.32	5445.31	-0.625395	0.0803015	-7.78809	6.80305e-15	2.64147e-13	ENSG00000136026	CKAP4	cytoskeleton associated protein 4
1307	411.079	394.068	393.319	382.914	215.056	204.529	246.612	213.456	307.629	-0.81962	0.105283	-7.78496	6.97348e-15	2.70108e-13	ENSG00000084636	COL16A1	collagen type XVI alpha 1 chain
8111	137.353	119.729	107.989	127.638	30.3033	42.7039	21.214	46.6935	79.203	-1.52443	0.195861	-7.78325	7.06839e-15	2.73123e-13	ENSG00000119714	GPR68	G protein-coupled receptor 68
57595	55.9224	32.9961	39.6291	37.5406	118.281	125.864	120.654	139.128	83.7519	1.41879	0.182391	7.77883	7.31961e-15	2.82149e-13	ENSG00000067840	PDZD4	PDZ domain containing 4
56479	65.7334	123.028	82.2303	106.615	13.6854	25.8471	22.5398	16.1998	56.9849	-1.78096	0.229055	-7.77526	7.52938e-15	2.89537e-13	ENSG00000185760	KCNQ5	potassium voltage-gated channel subfamily Q member 5
10019	1448.1	1708.73	1306.77	1386	884.661	858.574	711.993	795.696	1137.56	-0.817389	0.105157	-7.77302	7.66358e-15	2.93991e-13	ENSG00000111252	SH2B3	SH2B adaptor protein 3
55337	363.005	344.574	361.615	322.849	173.022	171.94	209.488	184.868	266.42	-0.87976	0.113406	-7.75765	8.65189e-15	3.31111e-13	ENSG00000130813	C19orf66	chromosome 19 open reading frame 66
124540	637.712	770.224	680.629	647.199	398.831	385.459	380.525	303.985	525.571	-0.865262	0.111564	-7.75576	8.78184e-15	3.35282e-13	ENSG00000153944	MSI2	musashi RNA binding protein 2
150465	2159.39	2342.73	2141.95	2127.8	1507.35	1549.7	1417.36	1509.44	1844.46	-0.544046	0.0702093	-7.74891	9.26811e-15	3.53005e-13	ENSG00000114999	TTL	tubulin tyrosine ligase
11245	5392.1	6032.63	5022	4929.83	3417.43	3397.21	3577.2	3457.23	4403.2	-0.61455	0.0793132	-7.7484	9.30569e-15	3.53594e-13	ENSG00000166073	GPR176	G protein-coupled receptor 176
54033	35.3194	26.3969	26.7496	40.5438	0.977527	2.24758	1.32587	0.95293	16.8142	-2.13315	0.275371	-7.74644	9.45067e-15	3.58252e-13	ENSG00000185272	RBM11	RNA binding motif protein 11
219285	183.465	220.131	201.118	172.687	48.8763	64.0559	96.7886	67.658	131.847	-1.3433	0.173588	-7.73845	1.00633e-14	3.80572e-13	ENSG00000177409	SAMD9L	sterile alpha motif domain containing 9 like
10501	121.656	100.403	164.461	84.0908	359.73	352.869	298.321	272.538	219.259	1.29772	0.167817	7.73292	1.05107e-14	3.96556e-13	ENSG00000167680	SEMA6B	semaphorin 6B
5532	1629.6	1603.14	1642.63	1503.12	2508.33	2400.41	2224.81	2286.08	1974.77	0.55219	0.0714594	7.72732	1.09833e-14	4.1341e-13	ENSG00000107758	PPP3CB	protein phosphatase 3 catalytic subunit beta
101	68.6767	75.4197	63.4065	91.599	16.618	21.352	14.5846	16.1998	45.982	-1.69127	0.218998	-7.72279	1.13811e-14	4.27379e-13	ENSG00000151651	ADAM8	ADAM metallopeptidase domain 8
2192	49.0548	134.341	44.5827	102.11	3.91011	2.24758	14.5846	4.76465	44.4495	-2.10146	0.272266	-7.71839	1.17807e-14	4.41347e-13	ENSG00000077942	FBLN1	fibulin 1
1907	23.5463	22.1545	28.7311	16.5178	86.0223	106.76	103.418	67.658	56.851	1.6274	0.210876	7.71733	1.1879e-14	4.43992e-13	ENSG00000127129	EDN2	endothelin 2
57333	54.9413	62.2213	96.1005	112.622	11.7303	15.733	10.607	17.1527	47.6385	-1.86315	0.241501	-7.71488	1.21098e-14	4.51562e-13	ENSG00000142552	RCN3	reticulocalbin 3
3832	3894.95	4431.85	3593.37	3504.79	5971.71	5993.16	6773.88	6472.3	5079.5	0.688552	0.0893287	7.70807	1.27732e-14	4.75192e-13	ENSG00000138160	KIF11	kinesin family member 11
57149	400.287	385.112	373.504	412.946	619.752	630.445	639.07	616.545	509.708	0.659757	0.085597	7.70771	1.28094e-14	4.75435e-13	ENSG00000102897	LYRM1	LYR motif containing 1
8743	3558.43	3638.53	3397.2	3973.29	1569.91	1749.74	1736.89	2417.58	2755.2	-0.915856	0.118945	-7.69982	1.36257e-14	5.04561e-13	ENSG00000121858	TNFSF10	TNF superfamily member 10
100129482	266.858	269.154	255.608	226.745	459.437	423.668	445.493	464.077	351.38	0.779008	0.101307	7.68957	1.47626e-14	5.454e-13	ENSG00000234420	ZNF37BP	zinc finger protein 37B, pseudogene
7390	1025.24	958.773	1034.32	1064.65	1506.37	1517.11	1445.2	1516.11	1258.47	0.546692	0.0711263	7.68621	1.51553e-14	5.58618e-13	ENSG00000188690	UROS	uroporphyrinogen III synthase
9246	155.013	180.065	183.285	181.696	73.3145	74.17	78.2264	78.1402	125.489	-1.11609	0.14524	-7.68448	1.53614e-14	5.64912e-13	ENSG00000156587	UBE2L6	ubiquitin conjugating enzyme E2 L6
3988	2077.96	1860.98	2046.84	1926.58	3097.78	2928.59	3761.5	3807.91	2688.52	0.755948	0.098422	7.68068	1.58247e-14	5.80616e-13	ENSG00000107798	LIPA	lipase A, lysosomal acid type
2314	7242.45	8314.08	7672.19	7239.32	5315.79	5337.99	5068.81	5305.91	6437.07	-0.527254	0.0687538	-7.66873	1.73713e-14	6.359e-13	ENSG00000177731	FLII	FLII, actin remodeling protein
51182	1588.39	1431.56	1582.19	1395.01	2201.39	2181.27	2219.51	2273.69	1859.13	0.555558	0.072507	7.66214	1.82866e-14	6.67877e-13	ENSG00000187522	HSPA14	heat shock protein family A (Hsp70) member 14
89891	1462.81	1311.83	1416.74	1395.01	2032.28	1956.51	2027.26	2032.6	1704.38	0.520712	0.0680523	7.65164	1.98433e-14	7.23081e-13	ENSG00000119333	WDR34	WD repeat domain 34
5708	13153.5	13341.7	13581.9	14490.7	9344.18	10146.7	9216.14	9864.73	11642.4	-0.493353	0.0644928	-7.64973	2.01399e-14	7.32222e-13	ENSG00000175166	PSMD2	proteasome 26S subunit, non-ATPase 2
642852	747.595	863.084	766.823	707.264	470.19	437.154	474.662	390.701	607.184	-0.778012	0.101788	-7.64344	2.11496e-14	7.67187e-13	ENSG00000223768	LOC642852	uncharacterized LOC642852
1909	159.919	199.862	193.192	165.178	68.4269	68.5511	90.1593	65.7521	126.38	-1.19814	0.156799	-7.64123	2.15162e-14	7.7872e-13	ENSG00000151617	EDNRA	endothelin receptor type A
169714	1142	1359.91	1193.83	1267.37	738.033	688.882	843.255	723.274	994.568	-0.711375	0.093284	-7.62591	2.42324e-14	8.75046e-13	ENSG00000165661	QSOX2	quiescin sulfhydryl oxidase 2
51361	420.89	399.725	376.476	369.399	213.101	220.262	202.858	235.374	304.761	-0.813751	0.106887	-7.61317	2.67451e-14	9.63608e-13	ENSG00000134709	HOOK1	hook microtubule tethering protein 1
8559	610.241	585.446	606.325	557.102	844.583	966.458	1011.64	984.376	770.771	0.670033	0.0880532	7.60941	2.75355e-14	9.89855e-13	ENSG00000165630	PRPF18	pre-mRNA processing factor 18
960	8953.48	9749.41	8992.83	9038.26	6444.83	6512.35	5558.05	6313.16	7695.3	-0.555215	0.0730343	-7.60211	2.91336e-14	1.04262e-12	ENSG00000026508	CD44	CD44 molecule (Indian blood group)
28231	299.234	308.749	343.782	309.334	156.404	146.092	173.689	178.198	239.435	-0.901286	0.118554	-7.6023	2.90912e-14	1.04262e-12	ENSG00000101187	SLCO4A1	solute carrier organic anion transporter family member 4A1
25937	7365.08	8140.62	6590.32	7177.75	4695.06	4900.84	4233.51	4830.4	5991.7	-0.634856	0.0837096	-7.58403	3.34975e-14	1.19612e-12	ENSG00000018408	WWTR1	WW domain containing transcription regulator 1
317662	402.249	348.816	308.116	304.829	608.021	579.875	651.003	621.31	478.028	0.812517	0.107209	7.57883	3.48685e-14	1.2423e-12	ENSG00000138286	FAM149B1	family with sequence similarity 149 member B1
9919	2224.14	2917.33	2316.32	2309.5	1524.94	1420.47	1392.17	1247.38	1919.03	-0.779638	0.102993	-7.5698	3.73788e-14	1.32878e-12	ENSG00000148396	SEC16A	SEC16 homolog A, endoplasmic reticulum export factor
5937	2673.48	2708.98	2410.44	2629.34	1696.01	1722.77	1331.18	1400.81	2071.63	-0.73646	0.0973505	-7.56503	3.87761e-14	1.37539e-12	ENSG00000153250	RBMS1	RNA binding motif single stranded interacting protein 1
56647	2830.46	2262.12	2709.64	2815.54	4071.4	4147.9	4539.79	4873.28	3531.27	0.711759	0.0941685	7.55835	4.08222e-14	1.44476e-12	ENSG00000107949	BCCIP	BRCA2 and CDKN1A interacting protein
10687	20.603	26.8683	24.7682	31.5341	0	0	1.32587	0	13.1374	-2.10087	0.278339	-7.54788	4.42405e-14	1.56229e-12	ENSG00000240694	PNMA2	PNMA family member 2
84959	1500.09	1956.2	1485.1	1648.78	894.437	963.086	668.239	858.59	1246.82	-0.913658	0.121068	-7.54667	4.46519e-14	1.57334e-12	ENSG00000154127	UBASH3B	ubiquitin associated and SH3 domain containing B
101928176	0.981095	1.88549	0	3.00324	24.4382	23.5995	39.7762	31.4467	15.6413	2.08263	0.276226	7.53957	4.71535e-14	1.65783e-12	ENSG00000249306	LINC01411	long intergenic non-protein coding RNA 1411
57161	92.223	112.187	76.286	112.622	26.3932	32.5899	18.5622	11.4352	60.2872	-1.69506	0.224897	-7.53703	4.80783e-14	1.68664e-12	ENSG00000139946	PELI2	pellino E3 ubiquitin protein ligase family member 2
51473	4202.03	4720.33	4258.14	4474.83	2281.55	2815.09	2751.18	2986.48	3561.21	-0.685578	0.0909889	-7.53474	4.89303e-14	1.71277e-12	ENSG00000146038	DCDC2	doublecortin domain containing 2
81031	13.7353	44.7805	26.7496	48.0519	0	0	0	0	16.6647	-2.09563	0.278262	-7.53113	5.03023e-14	1.75695e-12	ENSG00000197496	SLC2A10	solute carrier family 2 member 10
22854	432.663	452.047	445.827	460.998	218.966	233.748	234.679	289.691	346.077	-0.835342	0.111021	-7.52419	5.30475e-14	1.8488e-12	ENSG00000162631	NTNG1	netrin G1
283316	78.4876	81.5476	76.286	78.0844	13.6854	28.0947	22.5398	17.1527	49.4848	-1.60559	0.213617	-7.5162	5.63904e-14	1.96104e-12	ENSG00000177675	CD163L1	CD163 molecule like 1
203447	1773.82	2382.79	1727.83	1600.73	993.167	1059.73	957.28	957.694	1431.63	-0.876365	0.11668	-7.51085	5.87433e-14	2.03402e-12	ENSG00000123572	NRK	Nik related kinase
57484	50.0359	148.011	73.3138	75.0811	11.7303	14.6092	14.5846	10.4822	49.731	-1.91092	0.254414	-7.51108	5.86425e-14	2.03402e-12	ENSG00000170153	RNF150	ring finger protein 150
23065	2254.56	2513.83	2378.74	2356.05	1486.82	1342.93	963.909	1009.15	1788.25	-0.932405	0.124165	-7.50939	5.94048e-14	2.05248e-12	ENSG00000127463	EMC1	ER membrane protein complex subunit 1
283638	1997.51	2434.64	2143.93	2118.79	1465.31	1406.98	1416.03	1378.89	1795.26	-0.606147	0.0808457	-7.49758	6.5009e-14	2.23645e-12	ENSG00000099814	CEP170B	centrosomal protein 170B
3914	2170.18	2806.08	2247.96	2546.75	1426.21	1539.59	1416.03	1526.59	1959.93	-0.705109	0.0940417	-7.49783	6.48827e-14	2.23645e-12	ENSG00000196878	LAMB3	laminin subunit beta 3
4925	1649.22	1813.84	1590.12	1821.47	2454.57	2517.29	2773.72	2717.76	2167.25	0.593141	0.0791967	7.48947	6.91512e-14	2.37385e-12	ENSG00000070081	NUCB2	nucleobindin 2
84263	1512.85	1556	1477.17	1401.01	2054.76	2234.09	2386.57	2465.23	1885.96	0.604643	0.0808026	7.48297	7.26623e-14	2.48903e-12	ENSG00000119471	HSDL2	hydroxysteroid dehydrogenase like 2
6578	49.0548	73.5342	56.4714	63.0681	11.7303	15.733	9.2811	10.4822	36.1694	-1.77359	0.237079	-7.481	7.37601e-14	2.52124e-12	ENSG00000174640	SLCO2A1	solute carrier organic anion transporter family member 2A1
55280	1049.77	983.285	960.015	1016.6	1569.91	1609.26	1418.68	1440.83	1256.04	0.580398	0.0776361	7.47588	7.66894e-14	2.61578e-12	ENSG00000095485	CWF19L1	CWF19 like cell cycle control factor 1
23474	568.054	457.703	563.724	569.115	898.347	849.584	924.133	943.4	721.757	0.727877	0.0973715	7.47526	7.705e-14	2.62249e-12	ENSG00000105755	ETHE1	ETHE1, persulfide dioxygenase
1284	46262.6	67372.4	48997.4	54064.4	29034.5	29216.2	32857.8	29670.4	42184.5	-0.810156	0.108386	-7.47474	7.73549e-14	2.62728e-12	ENSG00000134871	COL4A2	collagen type IV alpha 2 chain
11343	1729.67	1982.12	1697.12	1711.85	1234.62	1139.52	1092.52	1125.41	1464.1	-0.620132	0.0829833	-7.47297	7.8406e-14	2.65733e-12	ENSG00000074416	MGLL	monoglyceride lipase
284217	66.7145	111.715	81.2396	82.5892	22.4831	23.5995	22.5398	14.2939	53.1469	-1.65151	0.221227	-7.46525	8.31409e-14	2.81185e-12	ENSG00000101680	LAMA1	laminin subunit alpha 1
3688	42286.2	45191.5	42887.6	41832.2	62880.4	60173.2	76811.7	69784.9	55231	0.631646	0.0846611	7.46088	8.59473e-14	2.90063e-12	ENSG00000150093	ITGB1	integrin subunit beta 1
51390	1403.95	1357.08	1429.62	1525.65	2014.68	2004.84	2194.32	2195.55	1765.71	0.549465	0.07376	7.44936	9.37951e-14	3.15882e-12	ENSG00000146416	AIG1	androgen induced 1
8887	3334.74	3281.7	3441.79	3117.37	4397.89	4536.73	4628.62	4699.85	3929.84	0.464326	0.0624247	7.43818	1.02079e-13	3.43057e-12	ENSG00000106052	TAX1BP1	Tax1 binding protein 1
6452	1118.45	1150.62	1006.58	1141.23	690.134	691.13	647.025	523.158	871.041	-0.764906	0.10294	-7.43061	1.08096e-13	3.62518e-12	ENSG00000087266	SH3BP2	SH3 domain binding protein 2
8519	64.7523	84.8472	77.2767	73.5795	18.573	23.5995	14.5846	20.9644	47.2722	-1.58866	0.213932	-7.42601	1.11925e-13	3.74575e-12	ENSG00000185885	IFITM1	interferon induced transmembrane protein 1
6588	417.947	411.98	594.436	710.267	1204.31	1476.66	1055.39	1310.28	897.659	1.14411	0.154132	7.4229	1.1458e-13	3.8266e-12	ENSG00000170290	SLN	sarcolipin
7424	1825.82	1508.87	1530.67	1680.32	1089.94	1010.29	880.379	893.848	1302.52	-0.730107	0.0984617	-7.41513	1.21507e-13	4.04946e-12	ENSG00000150630	VEGFC	vascular endothelial growth factor C
26996	145.202	124.443	131.767	100.609	243.404	247.233	271.804	274.444	192.363	0.973607	0.131569	7.39998	1.36207e-13	4.52995e-12	ENSG00000173890	GPR160	G protein-coupled receptor 160
84875	506.245	512.383	632.084	549.594	305.966	333.765	259.871	251.573	418.935	-0.886592	0.120301	-7.36977	1.70926e-13	5.67281e-12	ENSG00000178685	PARP10	poly(ADP-ribose) polymerase family member 10
2034	1091.96	1373.58	1050.17	1102.19	696.976	705.739	612.553	596.534	903.713	-0.793058	0.107777	-7.35834	1.8621e-13	6.16727e-12	ENSG00000116016	EPAS1	endothelial PAS domain protein 1
8847	203.087	166.866	144.646	148.661	338.224	392.202	298.321	351.631	255.455	0.988314	0.134358	7.3558	1.89786e-13	6.27274e-12	ENSG00000231607	DLEU2	deleted in lymphocytic leukemia 2
11200	209.954	171.108	192.201	225.243	426.202	341.632	361.963	416.43	293.092	0.918405	0.125039	7.34494	2.05857e-13	6.78987e-12	ENSG00000183765	CHEK2	checkpoint kinase 2
4291	701.483	601.944	659.824	665.219	1009.78	1006.91	994.404	979.612	827.398	0.593678	0.0808433	7.34356	2.07987e-13	6.84604e-12	ENSG00000178053	MLF1	myeloid leukemia factor 1
55038	1883.7	1645.09	1721.88	1728.37	1164.23	1196.83	1026.22	973.894	1417.53	-0.659408	0.0898488	-7.33909	2.15058e-13	7.06423e-12	ENSG00000170779	CDCA4	cell division cycle associated 4
2668	632.807	683.491	612.269	581.128	1048.89	1011.41	929.436	963.412	807.855	0.634013	0.0864571	7.33326	2.24617e-13	7.34366e-12	ENSG00000168621	GDNF	glial cell derived neurotrophic factor
56606	240.368	306.864	286.32	285.308	130.989	94.3982	124.632	150.563	202.43	-1.072	0.146186	-7.33312	2.24847e-13	7.34366e-12	ENSG00000109667	SLC2A9	solute carrier family 2 member 9
132430	123.618	147.068	97.0913	130.641	43.0112	40.4564	42.4279	47.6465	83.9951	-1.33769	0.182418	-7.33307	2.24942e-13	7.34366e-12	ENSG00000254535	PABPC4L	poly(A) binding protein cytoplasmic 4 like
51185	683.823	623.627	701.435	627.678	975.571	969.829	1050.09	1059.66	836.464	0.607443	0.0829009	7.32734	2.34763e-13	7.64868e-12	ENSG00000113851	CRBN	cereblon
219402	299.234	265.855	284.339	384.415	538.617	550.656	619.182	605.11	443.426	0.875833	0.119619	7.32187	2.44536e-13	7.95088e-12	ENSG00000122033	MTIF3	mitochondrial translational initiation factor 3
55051	391.457	407.738	393.319	399.432	200.393	221.386	247.938	240.138	312.725	-0.780237	0.106579	-7.32073	2.46634e-13	8.00286e-12	ENSG00000119720	NRDE2	NRDE-2, necessary for RNA interference, domain containing
23277	3680.09	3876.57	3915.35	3751.05	2768.36	2881.39	2610.64	2740.63	3278.01	-0.462582	0.0631938	-7.32005	2.47878e-13	8.02693e-12	ENSG00000132361	CLUH	clustered mitochondria homolog
84947	308.064	327.133	318.023	279.302	508.314	505.705	637.744	545.076	428.67	0.791899	0.108225	7.31717	2.53251e-13	8.18434e-12	ENSG00000122335	SERAC1	serine active site containing 1
114088	57.8846	71.1774	64.3973	39.0422	186.708	157.33	189.6	133.41	112.444	1.30816	0.178876	7.31321	2.6084e-13	8.41262e-12	ENSG00000100505	TRIM9	tripartite motif containing 9
55906	117.731	149.425	154.553	166.68	44.9662	59.5608	45.0796	64.7992	100.35	-1.28284	0.175588	-7.30596	2.75287e-13	8.8607e-12	ENSG00000126970	ZC4H2	zinc finger C4H2-type containing
54863	1541.3	1785.09	1707.02	1620.25	1037.16	1011.41	726.578	748.05	1272.11	-0.872622	0.119646	-7.29335	3.02349e-13	9.71222e-12	ENSG00000198113	TOR4A	torsin family 4 member A
10935	5725.67	4256.97	5496.55	5614.57	8320.71	8671.15	8636.73	9006.14	6966.06	0.694762	0.0952873	7.29123	3.07127e-13	9.84592e-12	ENSG00000165672	PRDX3	peroxiredoxin 3
27147	444.436	419.051	489.419	367.897	699.909	722.596	730.555	719.462	574.166	0.711399	0.0976416	7.28581	3.19739e-13	1.02297e-11	ENSG00000146966	DENND2A	DENN domain containing 2A
55255	553.338	551.035	543.909	567.613	795.707	860.822	822.041	830.002	690.558	0.567868	0.0780061	7.27979	3.34351e-13	1.06759e-11	ENSG00000164253	WDR41	WD repeat domain 41
54537	1633.52	1735.6	1415.75	1494.11	2306.96	2389.17	2702.13	2613.89	2036.39	0.6527	0.0896629	7.27949	3.35083e-13	1.06779e-11	ENSG00000122376	SHLD2	shieldin complex subunit 2
10628	773.103	908.808	748.99	839.407	1279.58	1215.94	1360.34	1302.65	1053.6	0.637799	0.0876564	7.27613	3.43533e-13	1.09254e-11	ENSG00000265972	TXNIP	thioredoxin interacting protein
9126	4180.45	4357.37	3839.07	3633.93	5764.47	5818.97	6630.69	6318.88	5067.98	0.600474	0.0825846	7.27102	3.56789e-13	1.13116e-11	ENSG00000108055	SMC3	structural maintenance of chromosomes 3
84620	325.724	362.486	323.968	264.286	155.427	179.806	120.654	138.175	233.816	-1.03181	0.14191	-7.2709	3.57088e-13	1.13116e-11	ENSG00000144057	ST6GAL2	ST6 beta-galactoside alpha-2,6-sialyltransferase 2
64175	1805.22	1879.84	1862.57	1845.49	1334.32	1245.16	1303.33	1367.45	1580.42	-0.486355	0.0668983	-7.27007	3.59305e-13	1.13593e-11	ENSG00000117385	P3H1	prolyl 3-hydroxylase 1
134218	1900.38	1738.42	1879.41	1578.21	2741.96	2702.71	2516.5	2733	2223.82	0.57838	0.0796073	7.26541	3.71907e-13	1.17345e-11	ENSG00000168724	DNAJC21	DnaJ heat shock protein family (Hsp40) member C21
100130417	95.1663	77.7766	61.4251	66.0714	230.696	210.148	153.801	182.962	134.756	1.22579	0.168914	7.25688	3.96119e-13	1.24738e-11	ENSG00000223764	LINC02593	long intergenic non-protein coding RNA 2593
1291	2119.17	2660.9	2173.66	2211.89	1308.91	1428.33	1392.17	1529.45	1853.06	-0.677227	0.0933614	-7.25382	4.05169e-13	1.27338e-11	ENSG00000142156	COL6A1	collagen type VI alpha 1 chain
80149	568.054	604.772	532.02	563.108	279.573	257.347	312.906	369.737	435.94	-0.853435	0.117707	-7.2505	4.1525e-13	1.3025e-11	ENSG00000163874	ZC3H12A	zinc finger CCCH-type containing 12A
5728	1409.83	1555.53	1294.88	1288.39	2195.52	2209.37	2150.56	2009.73	1764.23	0.608088	0.0838721	7.25018	4.16217e-13	1.30298e-11	ENSG00000171862	PTEN	phosphatase and tensin homolog
9517	3270.97	3839.81	3367.48	3162.42	2239.51	2322.87	2277.85	2033.55	2814.31	-0.607826	0.0838587	-7.24822	4.22288e-13	1.3194e-11	ENSG00000100596	SPTLC2	serine palmitoyltransferase long chain base subunit 2
83641	2134.86	1699.3	1964.61	1660.79	2842.65	2956.69	3130.38	3277.12	2458.3	0.688983	0.0950785	7.24646	4.27802e-13	1.33402e-11	ENSG00000065809	FAM107B	family with sequence similarity 107 member B
3416	1190.07	1282.14	1176.98	1046.63	1755.64	1827.28	1919.86	1719.08	1489.71	0.601792	0.0831298	7.23919	4.51387e-13	1.40483e-11	ENSG00000119912	IDE	insulin degrading enzyme
23022	5481.38	6854.24	5264.72	5751.21	3555.26	3734.35	3610.35	3823.15	4759.33	-0.648394	0.0896538	-7.2322	4.7522e-13	1.47613e-11	ENSG00000129116	PALLD	palladin, cytoskeletal associated protein
26959	731.897	724.501	745.027	723.782	1056.71	1093.45	1328.52	1174.01	947.236	0.650101	0.0899324	7.22877	4.87377e-13	1.51096e-11	ENSG00000105856	HBP1	HMG-box transcription factor 1
54898	411.079	392.183	426.013	370.901	588.471	669.778	666.914	659.427	523.096	0.66902	0.0925833	7.22615	4.96891e-13	1.53748e-11	ENSG00000197977	ELOVL2	ELOVL fatty acid elongase 2
6548	611.222	885.239	701.435	696.753	427.179	352.869	300.973	355.443	541.389	-0.951586	0.131746	-7.2229	5.08902e-13	1.5716e-11	ENSG00000090020	SLC9A1	solute carrier family 9 member A1
23670	2425.27	3089.38	2450.07	2823.05	1539.6	1663.21	1777.99	1629.51	2174.76	-0.686695	0.0951925	-7.21375	5.44319e-13	1.67774e-11	ENSG00000135048	CEMIP2	cell migration inducing hyaluronidase 2
5743	99.0906	131.513	108.98	93.1006	42.0336	16.8568	31.8209	31.4467	69.3553	-1.51158	0.209579	-7.21244	5.49584e-13	1.69071e-11	ENSG00000073756	PTGS2	prostaglandin-endoperoxide synthase 2
10006	1604.09	1505.57	1471.23	1555.68	2121.23	2074.51	2191.67	2183.16	1838.39	0.475869	0.065997	7.21046	5.57612e-13	1.71211e-11	ENSG00000136754	ABI1	abl interactor 1
91156	1149.84	1191.63	1184.91	780.844	1942.35	2162.17	2476.73	1930.64	1602.39	0.923658	0.128157	7.20724	5.70991e-13	1.74984e-11	ENSG00000163395	IGFN1	immunoglobulin-like and fibronectin type III domain containing 1
51665	1579.56	1683.27	1694.14	1752.39	1183.78	1213.69	1164.12	1163.53	1429.31	-0.496955	0.0691296	-7.18874	6.53941e-13	2.00021e-11	ENSG00000065802	ASB1	ankyrin repeat and SOCS box containing 1
81788	581.79	620.327	548.863	635.186	267.842	349.498	173.689	263.961	430.145	-1.08048	0.150572	-7.17579	7.18934e-13	2.19481e-11	ENSG00000163545	NUAK2	NUAK family kinase 2
1268	6.86767	6.12785	3.96291	1.50162	31.2808	50.5705	39.7762	36.2113	22.0374	1.88935	0.263584	7.16793	7.61402e-13	2.32003e-11	ENSG00000118432	CNR1	cannabinoid receptor 1
55920	4993.78	5162.01	4482.05	4713.59	3182.83	2972.42	2185.04	2345.16	3754.61	-0.81892	0.114268	-7.16665	7.68531e-13	2.3373e-11	ENSG00000179051	RCC2	regulator of chromosome condensation 2
339804	207.992	196.091	230.839	223.742	332.359	428.163	409.694	419.289	306.021	0.85162	0.118926	7.16093	8.01302e-13	2.43234e-11	ENSG00000237651	C2orf74	chromosome 2 open reading frame 74
57575	130.486	149.425	144.646	159.172	267.842	270.833	310.254	259.197	211.482	0.877355	0.12254	7.15975	8.08267e-13	2.44884e-11	ENSG00000138650	PCDH10	protocadherin 10
1390	681.861	496.827	628.121	650.202	1083.1	966.458	1109.75	1161.62	847.243	0.787236	0.110055	7.15309	8.48448e-13	2.56178e-11	ENSG00000095794	CREM	cAMP responsive element modulator
135398	51.017	54.2079	55.4807	78.0844	14.6629	11.2379	13.2587	11.4352	36.1731	-1.68082	0.23498	-7.15304	8.48747e-13	2.56178e-11	ENSG00000197261	C6orf141	chromosome 6 open reading frame 141
90550	1309.76	1328.8	1270.11	1190.79	1850.46	1948.65	2446.23	2402.34	1718.39	0.733376	0.102597	7.14813	8.79698e-13	2.65019e-11	ENSG00000156026	MCU	mitochondrial calcium uniporter
27300	442.474	522.753	467.623	453.49	242.427	261.843	254.567	304.937	368.764	-0.794909	0.111269	-7.14403	9.06353e-13	2.72536e-11	ENSG00000198131	ZNF544	zinc finger protein 544
85439	10.792	5.18511	1.98145	1.50162	51.8089	42.7039	30.4951	49.5523	24.2526	1.90083	0.267016	7.11879	1.08882e-12	3.26788e-11	ENSG00000140022	STON2	stonin 2
7368	761.33	774.466	721.249	677.232	327.471	338.26	411.02	481.229	561.532	-0.868848	0.122087	-7.1166	1.10622e-12	3.31389e-11	ENSG00000174607	UGT8	UDP glycosyltransferase 8
6574	2224.14	2445.01	2146.91	2630.84	1547.42	1537.34	1207.87	1287.41	1878.37	-0.731404	0.103072	-7.09608	1.28346e-12	3.83765e-11	ENSG00000144136	SLC20A1	solute carrier family 20 member 1
83690	497.415	478.444	430.966	429.464	260.022	246.11	302.299	246.809	361.441	-0.774778	0.109194	-7.09544	1.28941e-12	3.84825e-11	ENSG00000121005	CRISPLD1	cysteine rich secretory protein LCCL domain containing 1
26128	1512.85	1445.23	1446.46	1513.64	1990.24	1999.22	2072.34	2127.89	1763.48	0.463444	0.0653762	7.08888	1.35203e-12	4.02765e-11	ENSG00000198954	KIF1BP	KIF1 binding protein
2971	1825.82	1536.68	1813.03	1786.93	2601.2	2519.53	2564.24	2857.84	2188.16	0.587527	0.0830102	7.07776	1.46504e-12	4.35617e-11	ENSG00000122034	GTF3A	general transcription factor IIIA
22929	3344.55	2686.83	2962.27	2896.63	4480	4207.46	4526.53	4635.05	3717.42	0.574025	0.0812601	7.06404	1.61726e-12	4.79986e-11	ENSG00000086475	SEPHS1	selenophosphate synthetase 1
55700	6038.64	7521.23	6292.11	6044.03	4028.39	3961.35	4324.99	4386.33	5324.63	-0.617642	0.0874982	-7.05892	1.67803e-12	4.97102e-11	ENSG00000116871	MAP7D1	MAP7 domain containing 1
4240	3973.44	4018.46	4184.83	4401.25	2943.33	3044.34	3083.98	3038.89	3586.07	-0.446248	0.063228	-7.05777	1.69196e-12	5.00301e-11	ENSG00000140545	MFGE8	milk fat globule-EGF factor 8 protein
7168	44366.1	42740.4	42501.2	49014.5	31641.6	30771.6	31529.2	33248.7	38226.6	-0.482269	0.0683843	-7.05234	1.75939e-12	5.19281e-11	ENSG00000140416	TPM1	tropomyosin 1
7798	2398.78	3438.2	2422.33	2486.69	1386.13	1463.17	1629.5	1439.88	2083.08	-0.8229	0.116914	-7.03852	1.94293e-12	5.71343e-11	ENSG00000169641	LUZP1	leucine zipper protein 1
55024	186.408	211.647	162.479	183.198	84.0673	76.4176	91.4852	90.5283	135.779	-1.04114	0.147918	-7.03863	1.94135e-12	5.71343e-11	ENSG00000153064	BANK1	B cell scaffold protein with ankyrin repeats 1
23657	1162.6	1616.81	1070.98	1216.31	700.887	657.416	673.543	512.676	951.402	-0.936307	0.13318	-7.03037	2.0598e-12	6.046e-11	ENSG00000151012	SLC7A11	solute carrier family 7 member 11
5265	1009.55	993.655	1093.76	1016.6	575.763	338.26	224.072	415.477	708.392	-1.24163	0.176674	-7.02781	2.09805e-12	6.14697e-11	ENSG00000197249	SERPINA1	serpin family A member 1
9249	48.0737	40.0667	65.388	48.0519	129.033	131.483	144.52	119.116	90.7167	1.23583	0.175972	7.02289	2.17331e-12	6.35585e-11	ENSG00000162496	DHRS3	dehydrogenase/reductase 3
91754	1249.92	1374.05	1273.08	1322.93	868.044	825.984	962.583	853.825	1091.3	-0.562762	0.0801458	-7.02173	2.19141e-12	6.39707e-11	ENSG00000119638	NEK9	NIMA related kinase 9
26958	1719.86	1623.88	1786.28	1582.71	2310.87	2327.37	2520.48	2562.43	2054.23	0.523944	0.0746282	7.02072	2.20721e-12	6.43145e-11	ENSG00000158623	COPG2	coatomer protein complex subunit gamma 2
7058	68.6767	54.6793	95.1098	36.0389	1.95505	12.3617	1.32587	10.4822	35.0787	-1.90135	0.270869	-7.01946	2.22727e-12	6.47812e-11	ENSG00000186340	THBS2	thrombospondin 2
55388	948.719	866.855	947.135	726.785	1343.12	1427.21	1449.18	1377.94	1135.87	0.658033	0.0937922	7.01587	2.2853e-12	6.63485e-11	ENSG00000065328	MCM10	minichromosome maintenance 10 replication initiation factor
10724	2903.06	3037.06	2825.55	2744.97	4302.09	4326.58	4210.97	3748.82	3512.39	0.516426	0.0736184	7.01489	2.30124e-12	6.669e-11	ENSG00000198408	OGA	O-GlcNAcase
126917	1890.57	2258.35	2137	2058.72	1432.08	1475.53	1355.04	1386.51	1749.23	-0.552431	0.0788471	-7.00636	2.44604e-12	7.07583e-11	ENSG00000169991	IFFO2	intermediate filament family orphan 2
9127	7.84876	9.89884	7.92582	9.00973	54.7415	39.3326	39.7762	49.5523	27.2607	1.72379	0.246103	7.00435	2.48134e-12	7.15765e-11	ENSG00000099957	P2RX6	purinergic receptor P2X 6
114569	491.529	362.015	472.577	367.897	205.281	215.767	218.769	232.515	320.794	-0.902119	0.128796	-7.00424	2.48328e-12	7.15765e-11	ENSG00000147676	MAL2	mal, T cell differentiation protein 2 (gene/pseudogene)
83862	245.274	256.427	230.839	286.81	467.258	389.954	465.381	521.252	357.899	0.82113	0.117288	7.00098	2.54178e-12	7.3131e-11	ENSG00000189077	TMEM120A	transmembrane protein 120A
145173	666.164	642.01	699.453	636.688	1050.84	954.096	993.078	941.494	822.978	0.562858	0.0805683	6.9861	2.8263e-12	8.11712e-11	ENSG00000187676	B3GLCT	beta 3-glucosyltransferase
7321	694.616	589.688	644.963	666.72	1010.76	1012.53	920.155	1063.47	825.363	0.615686	0.0881457	6.98488	2.85108e-12	8.1736e-11	ENSG00000072401	UBE2D1	ubiquitin conjugating enzyme E2 D1
3437	548.432	617.499	589.483	605.154	304.011	340.508	347.378	400.23	469.087	-0.733777	0.105088	-6.98247	2.9003e-12	8.29983e-11	ENSG00000119917	IFIT3	interferon induced protein with tetratricopeptide repeats 3
54518	533.716	526.053	534.002	495.535	750.74	769.795	787.568	829.049	653.307	0.571055	0.0819094	6.97179	3.12933e-12	8.93585e-11	ENSG00000077420	APBB1IP	amyloid beta precursor protein binding family B member 1 interacting protein
10635	1258.75	1128.94	1222.56	1274.88	1680.37	1738.5	1858.87	1768.64	1491.44	0.521364	0.0747841	6.97159	3.13372e-12	8.93585e-11	ENSG00000111247	RAD51AP1	RAD51 associated protein 1
6319	1882.72	2839.55	2271.74	2455.15	1365.6	1318.2	1412.05	1287.41	1854.05	-0.778863	0.111737	-6.97051	3.15798e-12	8.98901e-11	ENSG00000099194	SCD	stearoyl-CoA desaturase
3624	12175.4	15878.7	11735.2	14594.3	8429.21	7856.4	5730.42	6235.97	10329.4	-0.891933	0.127964	-6.97016	3.16579e-12	8.99523e-11	ENSG00000122641	INHBA	inhibin subunit beta A
142940	999.736	1029.48	908.497	956.533	1372.45	1483.4	1469.07	1373.17	1199.04	0.535263	0.0768112	6.96856	3.20211e-12	9.08229e-11	ENSG00000165832	TRUB1	TruB pseudouridine synthase family member 1
23286	2719.6	3296.78	2862.21	2796.02	1530.81	1816.04	1889.37	1965.89	2359.59	-0.676458	0.0970959	-6.96691	3.23988e-12	9.17316e-11	ENSG00000113645	WWC1	WW and C2 domain containing 1
7145	3032.57	5388.27	3297.14	3614.4	1852.41	1574.43	2045.82	1613.31	2802.29	-1.02976	0.147823	-6.96618	3.25654e-12	9.20405e-11	ENSG00000079308	TNS1	tensin 1
57118	296.291	236.158	276.413	184.7	464.325	461.877	486.595	515.535	365.237	0.896142	0.128795	6.95789	3.45411e-12	9.74521e-11	ENSG00000183049	CAMK1D	calcium/calmodulin dependent protein kinase ID
7763	3123.81	3085.14	3039.55	3019.76	2351.93	2243.08	2194.32	2336.58	2674.27	-0.421447	0.0606114	-6.95326	3.5693e-12	1.00525e-10	ENSG00000107372	ZFAND5	zinc finger AN1-type containing 5
60559	5994.49	6311.22	5510.42	5446.38	3962.89	3865.83	3001.77	3138.95	4654	-0.710241	0.102161	-6.95214	3.59789e-12	1.01152e-10	ENSG00000129128	SPCS3	signal peptidase complex subunit 3
3604	1160.64	1292.51	1157.17	1175.77	608.021	803.508	474.662	615.592	910.983	-0.883836	0.127216	-6.94754	3.71701e-12	1.04317e-10	ENSG00000049249	TNFRSF9	TNF receptor superfamily member 9
10923	6354.55	4716.09	6072.17	5751.21	8976.63	9557.82	8606.23	9440.67	7434.42	0.656735	0.0945639	6.94488	3.7879e-12	1.06121e-10	ENSG00000113387	SUB1	SUB1 homolog, transcriptional regulator
84545	1359.8	1143.08	1372.16	1413.03	1979.49	2081.26	1911.91	2140.28	1675.12	0.605964	0.0872844	6.94241	3.8546e-12	1.07801e-10	ENSG00000055950	MRPL43	mitochondrial ribosomal protein L43
85395	893.778	718.844	905.525	959.537	487.786	524.809	460.078	541.264	686.452	-0.750749	0.108282	-6.93326	4.11252e-12	1.14813e-10	ENSG00000160256	FAM207A	family with sequence similarity 207 member A
677800	7.84876	7.54197	4.95364	10.5114	30.3033	41.5802	60.9901	57.1758	27.6131	1.78186	0.257184	6.92835	4.25765e-12	1.18658e-10	ENSG00000212464	SNORA12	small nucleolar RNA, H/ACA box 12
54913	60.8279	93.8033	53.4993	93.1006	18.573	22.4758	14.5846	13.341	46.2757	-1.62307	0.234313	-6.92693	4.30072e-12	1.1965e-10	ENSG00000178718	RPP25	ribonuclease P and MRP subunit p25
1434	13463.6	12396.2	12943.8	11711.2	17328.6	17854.7	21215.3	20369.8	15910.4	0.5892	0.0850988	6.92372	4.39942e-12	1.22183e-10	ENSG00000124207	CSE1L	chromosome segregation 1 like
55502	164.824	139.055	162.479	160.674	331.381	303.423	307.602	252.526	227.746	0.886032	0.128036	6.92018	4.51085e-12	1.25061e-10	ENSG00000144485	HES6	hes family bHLH transcription factor 6
64423	1539.34	2008.52	1578.23	2009.17	1116.34	1084.46	963.909	1007.25	1413.4	-0.743708	0.10759	-6.91242	4.76463e-12	1.31868e-10	ENSG00000203485	INF2	inverted formin, FH2 and WH2 domain containing
9870	1370.59	1697.89	1490.05	1381.49	950.156	885.545	1012.97	920.53	1213.65	-0.641262	0.0927773	-6.91184	4.78403e-12	1.32176e-10	ENSG00000119682	AREL1	apoptosis resistant E3 ubiquitin protein ligase 1
9858	702.464	796.621	670.722	674.228	434.022	461.877	457.426	446.924	580.536	-0.646734	0.0935776	-6.9112	4.80558e-12	1.32543e-10	ENSG00000196422	PPP1R26	protein phosphatase 1 regulatory subunit 26
51642	589.638	473.73	663.787	636.688	1003.92	949.601	1038.16	1099.68	806.9	0.765471	0.110816	6.9076	4.92927e-12	1.3572e-10	ENSG00000175581	MRPL48	mitochondrial ribosomal protein L48
51136	463.077	396.896	437.901	430.966	629.527	670.901	726.578	715.65	558.937	0.649208	0.0940886	6.89997	5.20144e-12	1.42968e-10	ENSG00000189050	RNFT1	ring finger protein, transmembrane 1
2041	37.2816	51.3797	33.6847	57.0616	0	5.61894	3.97762	9.5293	24.8167	-1.86436	0.270351	-6.89606	5.34661e-12	1.46706e-10	ENSG00000146904	EPHA1	EPH receptor A1
444	8749.41	10047.3	8600.5	9662.94	5785.98	5815.6	6646.6	6552.34	7732.59	-0.566822	0.0822378	-6.89248	5.48296e-12	1.5019e-10	ENSG00000198363	ASPH	aspartate beta-hydroxylase
23034	2079.92	2630.73	2242.02	2081.25	1496.59	1401.36	1430.62	1234.04	1824.57	-0.679282	0.0985677	-6.89153	5.51954e-12	1.50933e-10	ENSG00000020577	SAMD4A	sterile alpha motif domain containing 4A
6712	1369.61	1850.61	1468.26	1455.07	948.201	920.382	804.804	694.686	1188.95	-0.826914	0.120001	-6.89088	5.54496e-12	1.5137e-10	ENSG00000173898	SPTBN2	spectrin beta, non-erythrocytic 2
11240	72.6011	140.469	105.017	142.654	37.146	24.7233	27.8433	38.1172	73.5714	-1.4917	0.216692	-6.88393	5.82251e-12	1.58676e-10	ENSG00000117115	PADI2	peptidyl arginine deiminase 2
51167	711.294	642.01	627.13	689.245	980.459	1110.3	1164.12	962.459	860.877	0.640969	0.0931611	6.88022	5.97589e-12	1.62579e-10	ENSG00000065615	CYB5R4	cytochrome b5 reductase 4
8906	973.247	1038.91	953.079	931.006	630.505	639.435	704.038	652.757	815.372	-0.561224	0.0815945	-6.87821	6.06103e-12	1.64615e-10	ENSG00000213983	AP1G2	adaptor related protein complex 1 subunit gamma 2
64105	1361.76	1097.83	1290.92	1264.37	1863.17	1983.49	1873.46	1833.44	1571.05	0.579682	0.0843321	6.8738	6.25118e-12	1.69492e-10	ENSG00000123219	CENPK	centromere protein K
8334	51.9981	80.6048	58.4529	57.0616	171.067	144.969	145.846	157.233	108.404	1.15789	0.168655	6.86543	6.62901e-12	1.79432e-10	ENSG00000180573	HIST1H2AC	histone cluster 1 H2A family member c
7511	1586.43	1454.66	1602.01	1576.7	2213.12	2161.04	2650.42	2623.42	1983.47	0.617226	0.0899091	6.865	6.64924e-12	1.79675e-10	ENSG00000108039	XPNPEP1	X-prolyl aminopeptidase 1
3202	315.913	310.635	302.172	306.331	485.831	467.496	478.64	497.429	395.556	0.625656	0.0911454	6.86437	6.67845e-12	1.8016e-10	ENSG00000106004	HOXA5	homeobox A5
115908	64.7523	92.3892	67.3694	130.641	24.4382	20.2282	15.9105	24.7762	55.0631	-1.57652	0.229706	-6.86321	6.73323e-12	1.81332e-10	ENSG00000164932	CTHRC1	collagen triple helix repeat containing 1
79083	467.001	568.948	480.503	578.125	267.842	333.765	302.299	278.255	409.592	-0.79032	0.115263	-6.85665	7.04945e-12	1.89529e-10	ENSG00000115648	MLPH	melanophilin
54764	1325.46	1308.53	1265.16	1229.83	1729.24	1749.74	1771.36	1802.94	1522.78	0.451152	0.0658727	6.84884	7.44495e-12	1.99827e-10	ENSG00000019995	ZRANB1	zinc finger RANBP2-type containing 1
25932	16260.7	17940	15237.4	15684.4	11987.4	11531.2	11706.1	11298.9	13955.8	-0.477779	0.0698313	-6.8419	7.81486e-12	2.09404e-10	ENSG00000169504	CLIC4	chloride intracellular channel 4
11344	1590.36	1387.25	1532.65	1752.39	1027.38	1009.16	1036.83	1037.74	1296.72	-0.588644	0.086067	-6.83937	7.95409e-12	2.12779e-10	ENSG00000247596	TWF2	twinfilin actin binding protein 2
1437	35.3194	35.8244	58.4529	60.0649	6.84269	8.9903	3.97762	8.57637	27.2561	-1.77356	0.25935	-6.83846	8.00499e-12	2.13783e-10	ENSG00000164400	CSF2	colony stimulating factor 2
8505	780.952	833.388	746.017	693.749	1124.16	1117.05	1323.22	1249.29	983.477	0.632166	0.0924779	6.83585	8.15187e-12	2.17342e-10	ENSG00000227345	PARG	poly(ADP-ribose) glycohydrolase
4883	506.245	521.81	506.262	420.454	822.1	713.605	881.705	806.178	647.295	0.689734	0.100969	6.83116	8.42315e-12	2.24202e-10	ENSG00000113389	NPR3	natriuretic peptide receptor 3
85352	9.81095	12.7271	6.93509	13.5146	47.8988	43.8277	76.9006	48.5994	32.5268	1.67973	0.245978	6.82878	8.56377e-12	2.27566e-10	ENSG00000138944	SHISAL1	shisa like 1
22978	1857.21	1931.22	1851.67	1792.94	2594.36	2552.12	3134.36	3036.99	2343.86	0.590271	0.0865054	6.82351	8.88405e-12	2.35409e-10	ENSG00000076685	NT5C2	5'-nucleotidase, cytosolic II
9732	187.389	237.572	205.08	201.217	59.6291	102.265	96.7886	97.1988	148.393	-1.11695	0.163693	-6.82344	8.88835e-12	2.35409e-10	ENSG00000128512	DOCK4	dedicator of cytokinesis 4
1647	2398.78	2072.63	2280.65	2618.83	1609.99	1473.29	1292.73	1495.15	1905.25	-0.651106	0.0954746	-6.81968	9.12461e-12	2.41267e-10	ENSG00000116717	GADD45A	growth arrest and DNA damage inducible alpha
114800	21.5841	22.1545	26.7496	19.5211	68.4269	64.0559	95.4628	74.3285	49.0354	1.43103	0.209979	6.81509	9.42068e-12	2.48684e-10	ENSG00000055813	CCDC85A	coiled-coil domain containing 85A
54972	1607.03	1756.34	1730.8	1798.94	1214.09	1251.9	1055.39	1148.28	1445.35	-0.548476	0.0805358	-6.81034	9.73683e-12	2.56606e-10	ENSG00000006118	TMEM132A	transmembrane protein 132A
54838	983.058	1031.36	983.792	887.459	1559.15	1548.58	1386.86	1362.69	1217.87	0.574696	0.0844364	6.80626	1.00169e-11	2.63554e-10	ENSG00000166272	WBP1L	WW domain binding protein 1 like
4751	1160.64	1076.62	1010.54	1091.68	1553.29	1496.89	1698.44	1571.38	1332.43	0.53119	0.0780778	6.80334	1.0222e-11	2.68507e-10	ENSG00000117650	NEK2	NIMA related kinase 2
64789	152.07	164.509	139.693	210.227	83.0898	52.818	59.6642	64.7992	115.859	-1.19015	0.175066	-6.79831	1.05853e-11	2.77595e-10	ENSG00000164002	EXO5	exonuclease 5
4015	1478.51	3232.68	1424.67	2875.61	544.482	478.734	591.339	511.723	1392.22	-1.59611	0.235157	-6.78743	1.14152e-11	2.98868e-10	ENSG00000113083	LOX	lysyl oxidase
83666	466.02	542.079	503.289	432.467	236.561	232.624	312.906	284.926	376.359	-0.829549	0.122452	-6.77447	1.24867e-11	3.26388e-10	ENSG00000138496	PARP9	poly(ADP-ribose) polymerase family member 9
122402	890.835	858.371	884.719	647.199	453.572	497.838	499.854	465.03	649.677	-0.749412	0.110782	-6.76477	1.33522e-11	3.48442e-10	ENSG00000156414	TDRD9	tudor domain containing 9
1147	1159.65	1205.77	1122.49	1130.72	1577.73	1596.9	1849.59	1783.88	1428.34	0.545571	0.080673	6.76274	1.35407e-11	3.52786e-10	ENSG00000213341	CHUK	conserved helix-loop-helix ubiquitous kinase
2042	34.3383	50.4369	29.7218	48.0519	110.46	122.493	121.98	100.058	77.1925	1.27342	0.188571	6.753	1.44817e-11	3.76688e-10	ENSG00000044524	EPHA3	EPH receptor A3
57381	14.7164	49.4942	16.8424	28.5308	0	0	0	0	13.698	-1.86824	0.276737	-6.75096	1.46874e-11	3.81418e-10	ENSG00000126785	RHOJ	ras homolog family member J
9314	29.4329	41.4808	50.5271	45.0487	6.84269	5.61894	9.2811	4.76465	24.1246	-1.75127	0.259459	-6.74972	1.48129e-11	3.84056e-10	ENSG00000136826	KLF4	Kruppel like factor 4
100131755	79.4687	114.072	72.3231	126.136	26.3932	38.2088	19.8881	22.8703	62.4201	-1.49094	0.220934	-6.74835	1.4954e-11	3.87085e-10	ENSG00000196440	ARMCX4	armadillo repeat containing X-linked 4
55671	1695.33	1694.59	1620.83	1513.64	1139.8	1202.45	1066	1139.7	1384.04	-0.512286	0.0759221	-6.74752	1.50391e-11	3.8866e-10	ENSG00000100796	PPP4R3A	protein phosphatase 4 regulatory subunit 3A
5806	155.994	237.101	162.479	247.768	77.2246	71.9224	54.3607	92.4342	137.41	-1.24856	0.185076	-6.74623	1.51741e-11	3.91516e-10	ENSG00000163661	PTX3	pentraxin 3
5396	85.3553	178.65	71.3323	123.133	20.5281	24.7233	37.1244	24.7762	70.7029	-1.60083	0.237682	-6.73518	1.63728e-11	4.21764e-10	ENSG00000116132	PRRX1	paired related homeobox 1
382	4639.6	4336.16	4387.93	4429.79	2994.16	3160.09	2275.2	2638.66	3607.7	-0.662276	0.0983787	-6.7319	1.6746e-11	4.30685e-10	ENSG00000165527	ARF6	ADP ribosylation factor 6
79772	408.136	560.934	460.688	486.526	261	296.68	237.331	256.338	370.954	-0.824987	0.122574	-6.73054	1.69033e-11	4.34033e-10	ENSG00000175471	MCTP1	multiple C2 and transmembrane domain containing 1
79647	2172.15	2041.52	1969.57	2133.81	1491.71	1541.84	1412.05	1520.88	1785.44	-0.470065	0.0698566	-6.72901	1.70821e-11	4.37219e-10	ENSG00000174574	AKIRIN1	akirin 1
7187	1918.04	2113.17	1946.78	1827.47	1410.57	1317.08	1397.47	1377.94	1663.56	-0.497747	0.0739679	-6.72923	1.70558e-11	4.37219e-10	ENSG00000131323	TRAF3	TNF receptor associated factor 3
100129842	1.96219	1.41412	0	0	24.4382	24.7233	21.214	18.1057	11.4822	1.87255	0.27837	6.72684	1.73381e-11	4.43064e-10	ENSG00000237440	ZNF737	zinc finger protein 737
51109	1873.89	2063.2	1895.26	2174.35	1268.83	1317.08	1384.21	1454.17	1678.87	-0.548771	0.0816015	-6.72501	1.75579e-11	4.47964e-10	ENSG00000072042	RDH11	retinol dehydrogenase 11
29103	340.44	265.855	319.014	330.357	493.651	518.066	534.326	573.664	421.922	0.734757	0.109326	6.72078	1.80752e-11	4.60427e-10	ENSG00000120675	DNAJC15	DnaJ heat shock protein family (Hsp40) member C15
272	203.087	203.162	171.396	190.706	83.0898	93.2744	103.418	101.011	143.643	-0.94934	0.141268	-6.72011	1.81582e-11	4.61808e-10	ENSG00000133805	AMPD3	adenosine monophosphate deaminase 3
22859	87.3175	88.6182	97.0913	72.0779	185.73	206.777	160.43	175.339	134.173	0.986247	0.146801	6.71824	1.83933e-11	4.67044e-10	ENSG00000072071	ADGRL1	adhesion G protein-coupled receptor L1
22882	321.799	391.711	288.302	333.36	198.438	175.311	144.52	161.045	251.811	-0.914103	0.136079	-6.71742	1.84965e-11	4.68919e-10	ENSG00000178764	ZHX2	zinc fingers and homeoboxes 2
7083	4866.23	4592.12	4907.07	5257.18	6567.02	6766.33	6654.55	7317.55	5866.01	0.470167	0.0700507	6.71181	1.92219e-11	4.8654e-10	ENSG00000167900	TK1	thymidine kinase 1
1303	2896.19	4623.7	3048.47	3033.28	1551.33	1580.05	2056.43	1558.99	2543.55	-0.943968	0.140651	-6.71141	1.92758e-11	4.87133e-10	ENSG00000111799	COL12A1	collagen type XII alpha 1 chain
199857	276.669	227.673	282.357	315.341	447.707	471.991	498.528	483.135	375.425	0.765777	0.114423	6.69252	2.19357e-11	5.53479e-10	ENSG00000172339	ALG14	ALG14, UDP-N-acetylglucosaminyltransferase subunit
64129	1755.18	1834.11	1735.75	1988.15	1087.01	1172.11	1104.45	1357.92	1504.34	-0.611854	0.0914842	-6.68808	2.2612e-11	5.69645e-10	ENSG00000142910	TINAGL1	tubulointerstitial nephritis antigen like 1
72	121.656	508.14	138.702	537.581	8.79774	7.86652	5.30349	2.85879	166.363	-1.84166	0.275499	-6.6848	2.31232e-11	5.81608e-10	ENSG00000163017	ACTG2	actin, gamma 2, smooth muscle, enteric
2070	43.1682	62.6926	67.3694	48.0519	136.854	114.626	204.184	203.927	110.109	1.32559	0.198493	6.67829	2.41745e-11	6.07095e-10	ENSG00000112319	EYA4	EYA transcriptional coactivator and phosphatase 4
91452	1194.97	1133.65	1126.46	1108.2	1652.02	1544.08	1575.14	1543.75	1359.78	0.460908	0.0690316	6.67677	2.44265e-11	6.12462e-10	ENSG00000107897	ACBD5	acyl-CoA binding domain containing 5
10370	10105.3	8810.91	9828.01	9443.7	13978.6	13461.9	12472.5	13139.9	11405.1	0.467072	0.0699712	6.67521	2.46885e-11	6.18062e-10	ENSG00000164442	CITED2	Cbp/p300 interacting transactivator with Glu/Asp rich carboxy-terminal domain 2
30001	2382.1	2671.27	2203.38	2258.44	1682.32	1567.68	1321.89	1444.64	1941.47	-0.641575	0.0961407	-6.67329	2.50127e-11	6.25201e-10	ENSG00000197930	ERO1A	endoplasmic reticulum oxidoreductase 1 alpha
140885	5976.83	7054.57	5758.11	6116.11	4411.58	4361.42	4184.45	4282.47	5268.19	-0.520712	0.0780588	-6.67076	2.54477e-11	6.35082e-10	ENSG00000198053	SIRPA	signal regulatory protein alpha
55732	482.699	449.69	483.475	402.435	694.044	681.016	861.817	809.99	608.146	0.712199	0.106788	6.66928	2.5707e-11	6.40216e-10	ENSG00000000460	C1orf112	chromosome 1 open reading frame 112
9734	657.334	734.871	597.408	681.737	369.505	397.821	460.078	401.183	537.492	-0.693366	0.103967	-6.66912	2.57335e-11	6.40216e-10	ENSG00000048052	HDAC9	histone deacetylase 9
11142	808.423	706.117	790.6	825.892	1094.83	1159.75	1164.12	1169.24	964.871	0.544155	0.0816058	6.66809	2.59151e-11	6.43733e-10	ENSG00000168734	PKIG	cAMP-dependent protein kinase inhibitor gamma
5054	20385.2	28010.4	19871	24871.4	12792.9	13064	13816.9	15157.3	18496.1	-0.733361	0.110009	-6.66638	2.62189e-11	6.50269e-10	ENSG00000106366	SERPINE1	serpin family E member 1
9585	3000.19	3444.32	2912.74	2678.89	5050.88	4948.04	4480.12	4276.75	3848.99	0.619922	0.0930016	6.66571	2.6339e-11	6.52236e-10	ENSG00000138182	KIF20B	kinesin family member 20B
652995	174.635	250.771	171.396	202.719	76.2471	97.7696	78.2264	95.293	143.382	-1.09263	0.163967	-6.66371	2.66992e-11	6.60134e-10	ENSG00000214049	UCA1	urothelial cancer associated 1
5865	3429.91	4959.79	3497.27	3072.32	2194.55	2013.83	1785.95	1535.17	2811.1	-0.925205	0.139196	-6.64679	2.99559e-11	7.39514e-10	ENSG00000169213	RAB3B	RAB3B, member RAS oncogene family
7056	32.3761	59.8644	38.6384	45.0487	10.7528	2.24758	5.30349	6.67051	25.1127	-1.75705	0.264897	-6.63297	3.29006e-11	8.10956e-10	ENSG00000178726	THBD	thrombomodulin
5654	86.3364	75.8911	81.2396	67.573	166.18	138.226	216.117	195.351	128.364	1.08098	0.163249	6.62165	3.55207e-11	8.74192e-10	ENSG00000166033	HTRA1	HtrA serine peptidase 1
221935	40.2249	51.8511	27.7404	31.5341	0	8.9903	1.32587	1.90586	20.4466	-1.83071	0.276537	-6.6201	3.5896e-11	8.82071e-10	ENSG00000146555	SDK1	sidekick cell adhesion molecule 1
3954	1395.12	1547.05	1420.7	1336.44	1021.52	927.125	765.028	817.614	1153.82	-0.667651	0.100877	-6.61845	3.62983e-11	8.90589e-10	ENSG00000168924	LETM1	leucine zipper and EF-hand containing transmembrane protein 1
3339	3658.5	6580.37	4100.62	4245.09	2475.1	2241.96	2204.92	1671.44	3397.25	-1.02048	0.154218	-6.61712	3.66275e-11	8.97289e-10	ENSG00000142798	HSPG2	heparan sulfate proteoglycan 2
25934	953.625	762.211	865.895	937.012	1326.5	1360.91	1312.61	1317.9	1104.58	0.585548	0.088504	6.61606	3.68897e-11	9.02331e-10	ENSG00000136783	NIPSNAP3A	nipsnap homolog 3A
10559	265.877	188.078	205.08	199.716	374.393	373.098	400.413	416.43	302.886	0.823192	0.124503	6.61183	3.79602e-11	9.27097e-10	ENSG00000164414	SLC35A1	solute carrier family 35 member A1
2631	2057.36	1636.61	2007.21	1827.47	2710.68	2738.67	2989.84	3011.26	2372.39	0.590106	0.0892774	6.60981	3.84817e-11	9.38402e-10	ENSG00000146729	NIPSNAP2	nipsnap homolog 2
8453	1721.82	1545.16	1709	1669.8	2189.66	2450.98	2757.81	2579.58	2077.98	0.572258	0.0865896	6.60886	3.87292e-11	9.39661e-10	ENSG00000108094	CUL2	cullin 2
1130	317.875	293.194	333.875	340.868	516.134	507.952	542.282	474.559	415.842	0.65159	0.0985879	6.60923	3.86318e-11	9.39661e-10	ENSG00000143669	LYST	lysosomal trafficking regulator
8722	192.295	138.584	141.674	183.198	73.3145	68.5511	71.5971	71.4697	117.585	-1.07684	0.162933	-6.6091	3.8666e-11	9.39661e-10	ENSG00000174080	CTSF	cathepsin F
11249	20.603	23.0973	22.7867	28.5308	0	0	1.32587	2.85879	12.4003	-1.83896	0.278263	-6.60871	3.87683e-11	9.39661e-10	ENSG00000144227	NXPH2	neurexophilin 2
1119	368.892	284.238	345.764	279.302	536.662	540.542	531.675	635.604	440.335	0.775879	0.117419	6.60778	3.90137e-11	9.44179e-10	ENSG00000110721	CHKA	choline kinase alpha
5327	133.429	139.526	106.008	162.175	57.6741	42.7039	55.6866	59.0816	94.5356	-1.16959	0.177034	-6.60663	3.9317e-11	9.50082e-10	ENSG00000104368	PLAT	plasminogen activator, tissue type
6604	400.287	329.961	408.18	334.862	625.617	548.409	640.396	634.651	490.295	0.706423	0.107051	6.59892	4.14165e-11	9.99306e-10	ENSG00000082014	SMARCD3	SWI/SNF related, matrix associated, actin dependent regulator of chromatin, subfamily d, member 3
79850	2236.9	1984.48	2198.42	2160.83	1422.3	1584.54	1390.84	1556.13	1816.81	-0.514951	0.0780629	-6.59661	4.20666e-11	1.01346e-09	ENSG00000167695	FAM57A	family with sequence similarity 57 member A
57630	513.113	688.676	556.789	554.099	379.28	279.823	251.916	255.385	434.885	-0.921663	0.139902	-6.58793	4.45991e-11	1.07286e-09	ENSG00000154447	SH3RF1	SH3 domain containing ring finger 1
945	76.5254	104.173	112.943	118.628	21.5056	19.1044	42.4279	38.1172	66.6781	-1.43268	0.217594	-6.5842	4.57345e-11	1.09852e-09	ENSG00000105383	CD33	CD33 molecule
729993	386.552	595.344	365.578	483.522	203.326	206.777	217.443	245.856	338.05	-0.98716	0.149996	-6.58125	4.66519e-11	1.11783e-09	ENSG00000237515	SHISA9	shisa family member 9
10090	51.017	46.1946	37.6476	42.0454	12.7078	7.86652	7.95523	4.76465	26.2749	-1.66546	0.253065	-6.58116	4.66783e-11	1.11783e-09	ENSG00000111962	UST	uronyl 2-sulfotransferase
55100	1098.83	998.84	1074.94	974.553	1457.49	1418.22	1466.41	1485.62	1246.86	0.481778	0.0733054	6.5722	4.95765e-11	1.18546e-09	ENSG00000082068	WDR70	WD repeat domain 70
8738	160.9	148.954	189.229	151.664	284.46	341.632	282.411	286.832	230.76	0.831592	0.126547	6.57139	4.98462e-11	1.19013e-09	ENSG00000169372	CRADD	CASP2 and RIPK1 domain containing adaptor with death domain
3694	202.106	239.929	167.433	240.26	65.4943	48.3229	98.1145	101.011	145.334	-1.24767	0.190134	-6.56207	5.30659e-11	1.26512e-09	ENSG00000115221	ITGB6	integrin subunit beta 6
1787	366.93	315.349	381.43	312.337	543.505	659.664	531.675	587.005	462.237	0.724637	0.110471	6.55951	5.39849e-11	1.28511e-09	ENSG00000107614	TRDMT1	tRNA aspartic acid methyltransferase 1
970	1302.89	1262.34	1537.61	1476.09	2126.12	2048.67	1992.79	2045.94	1724.06	0.548239	0.0836526	6.55376	5.61057e-11	1.33361e-09	ENSG00000125726	CD70	CD70 molecule
5590	445.417	437.434	401.244	427.962	172.045	223.634	214.791	283.02	325.694	-0.879233	0.13419	-6.55214	5.67197e-11	1.34621e-09	ENSG00000067606	PRKCZ	protein kinase C zeta
57709	316.894	527.938	315.051	355.884	136.854	141.597	205.51	154.375	269.263	-1.12508	0.171757	-6.55045	5.73646e-11	1.3595e-09	ENSG00000013293	SLC7A14	solute carrier family 7 member 14
301	3403.42	3318.94	3222.84	4076.9	4954.1	5118.85	5507.67	5502.22	4388.12	0.574699	0.0877481	6.54942	5.77608e-11	1.36686e-09	ENSG00000135046	ANXA1	annexin A1
10771	2390.93	2505.82	2428.27	2042.21	3277.65	3369.12	3935.19	3686.88	2954.51	0.588753	0.0899571	6.54482	5.95685e-11	1.40495e-09	ENSG00000015171	ZMYND11	zinc finger MYND-type containing 11
3987	3660.47	4200.88	3389.28	3869.68	2688.2	2647.64	2338.84	2450.93	3155.74	-0.5645	0.0862522	-6.54477	5.95885e-11	1.40495e-09	ENSG00000169756	LIMS1	LIM zinc finger domain containing 1
2304	478.775	366.257	457.716	328.855	194.528	203.406	178.993	242.044	306.322	-0.92394	0.141175	-6.54465	5.9634e-11	1.40495e-09	ENSG00000178919	FOXE1	forkhead box E1
85453	734.84	911.164	660.815	786.85	463.348	484.353	461.403	443.112	618.236	-0.714178	0.10918	-6.54129	6.09904e-11	1.4348e-09	ENSG00000180543	TSPYL5	TSPY like 5
50944	46.1115	74.0056	47.5549	63.0681	9.77527	16.8568	15.9105	5.71758	34.875	-1.62881	0.249423	-6.53033	6.56252e-11	1.53931e-09	ENSG00000161681	SHANK1	SH3 and multiple ankyrin repeat domains 1
158880	35.3194	39.5954	54.49	49.5535	12.7078	5.61894	5.30349	7.62344	26.2765	-1.67394	0.256329	-6.53044	6.55773e-11	1.53931e-09	ENSG00000247746	USP51	ubiquitin specific peptidase 51
115273	156.975	182.421	188.238	159.172	84.0673	95.522	76.9006	77.1873	127.56	-0.967268	0.148243	-6.52487	6.8059e-11	1.59406e-09	ENSG00000188060	RAB42	RAB42, member RAS oncogene family
8877	3597.68	3243.52	3567.61	4012.33	2580.67	2540.88	2247.35	2335.63	3015.71	-0.555895	0.0852882	-6.51784	7.13254e-11	1.66812e-09	ENSG00000176170	SPHK1	sphingosine kinase 1
51599	1381.38	1408.93	1454.39	1534.66	1024.45	1021.52	873.75	1025.35	1215.55	-0.535194	0.0821225	-6.51702	7.17202e-11	1.6749e-09	ENSG00000105699	LSR	lipolysis stimulated lipoprotein receptor
57449	576.884	649.552	609.297	590.138	410.561	401.192	407.043	390.701	504.421	-0.580816	0.08915	-6.51504	7.267e-11	1.69461e-09	ENSG00000171680	PLEKHG5	pleckstrin homology and RhoGEF domain containing G5
64077	222.709	249.356	291.274	279.302	484.853	404.564	514.438	432.63	359.891	0.780453	0.119857	6.51155	7.43781e-11	1.73192e-09	ENSG00000107902	LHPP	phospholysine phosphohistidine inorganic pyrophosphate phosphatase
5866	19.6219	19.3263	28.7311	4.50487	66.4718	87.6555	78.2264	68.6109	46.6436	1.52944	0.234929	6.51021	7.5046e-11	1.74493e-09	ENSG00000167994	RAB3IL1	RAB3A interacting protein like 1
1993	312.969	274.811	310.098	274.797	183.775	134.855	164.408	156.28	226.499	-0.825112	0.126823	-6.50602	7.71691e-11	1.79169e-09	ENSG00000107105	ELAVL2	ELAV like RNA binding protein 2
8028	580.808	671.707	704.407	554.099	914.965	1064.23	1133.62	996.764	827.575	0.679056	0.104395	6.50465	7.78745e-11	1.80545e-09	ENSG00000078403	MLLT10	MLLT10, histone lysine methyltransferase DOT1L cofactor
5575	589.638	501.541	605.334	615.665	352.887	305.67	383.177	344.96	462.359	-0.704388	0.108386	-6.49888	8.0921e-11	1.87066e-09	ENSG00000188191	PRKAR1B	protein kinase cAMP-dependent type I regulatory subunit beta
2888	248.217	228.145	244.71	244.764	152.494	128.112	118.003	115.304	184.969	-0.850352	0.130845	-6.49892	8.08982e-11	1.87066e-09	ENSG00000115290	GRB14	growth factor receptor bound protein 14
64116	1317.61	1367.45	1242.37	1286.89	819.167	883.297	845.906	986.282	1093.62	-0.548085	0.0843633	-6.49672	8.20881e-11	1.8949e-09	ENSG00000138821	SLC39A8	solute carrier family 39 member 8
79844	7.84876	16.9694	11.8887	12.013	50.8314	67.4273	54.3607	44.7877	33.2659	1.56379	0.240749	6.49552	8.27452e-11	1.90731e-09	ENSG00000188818	ZDHHC11	zinc finger DHHC-type containing 11
84287	1017.4	910.222	1011.53	1118.71	1388.09	1568.81	1511.49	1613.31	1267.44	0.573247	0.0882762	6.49378	8.37084e-11	1.9255e-09	ENSG00000171307	ZDHHC16	zinc finger DHHC-type containing 16
152519	188.37	225.788	205.08	199.716	94.8201	122.493	66.2936	80.0461	147.826	-1.06009	0.16325	-6.49366	8.37748e-11	1.9255e-09	ENSG00000163293	NIPAL1	NIPA like domain containing 1
10231	32.3761	51.8511	33.6847	34.5373	3.91011	4.49515	10.607	1.90586	21.6709	-1.74775	0.269195	-6.49253	8.44074e-11	1.93725e-09	ENSG00000172348	RCAN2	regulator of calcineurin 2
3655	1459.87	1706.37	1385.04	1334.94	853.381	873.183	970.538	1009.15	1199.06	-0.648483	0.0999125	-6.49051	8.55476e-11	1.96061e-09	ENSG00000091409	ITGA6	integrin subunit alpha 6
79004	1156.71	902.208	1204.72	1267.37	1944.3	1848.63	1703.75	1924.92	1494.08	0.689746	0.106293	6.48909	8.63544e-11	1.97627e-09	ENSG00000107874	CUEDC2	CUE domain containing 2
26071	842.761	947.932	986.764	980.559	1455.54	1426.09	1278.14	1359.83	1159.7	0.543363	0.0837378	6.48886	8.64896e-11	1.97653e-09	ENSG00000203950	RTL8A	retrotransposon Gag like 8A
64841	2823.59	2908.37	2587.78	2755.48	2017.61	2077.88	1888.04	2053.56	2389.04	-0.455332	0.0702324	-6.48321	8.97891e-11	2.04901e-09	ENSG00000100522	GNPNAT1	glucosamine-phosphate N-acetyltransferase 1
133418	831.969	1076.62	810.415	815.381	479.966	411.306	556.866	531.735	689.282	-0.797557	0.123034	-6.48242	9.02659e-11	2.05696e-09	ENSG00000170571	EMB	embigin
22943	155.013	226.731	147.618	274.797	68.4269	68.5511	72.923	89.5754	137.954	-1.22745	0.18937	-6.48177	9.06528e-11	2.06283e-09	ENSG00000107984	DKK1	dickkopf WNT signaling pathway inhibitor 1
8861	1278.37	1476.34	1431.6	1286.89	1945.28	1905.94	2272.54	2064.05	1707.63	0.563571	0.0869904	6.47854	9.26139e-11	2.10447e-09	ENSG00000198728	LDB1	LIM domain binding 1
54625	612.204	746.655	548.863	503.043	325.516	356.241	326.164	261.103	459.974	-0.875347	0.135222	-6.47339	9.58307e-11	2.17447e-09	ENSG00000173193	PARP14	poly(ADP-ribose) polymerase family member 14
7090	380.665	551.035	403.226	454.992	251.224	256.224	182.97	209.644	336.248	-0.923333	0.142685	-6.47112	9.72802e-11	2.20424e-09	ENSG00000140332	TLE3	transducin like enhancer of split 3
26272	505.264	400.667	501.308	470.008	750.74	729.338	719.948	739.473	602.093	0.63293	0.0978494	6.46841	9.90421e-11	2.24099e-09	ENSG00000151876	FBXO4	F-box protein 4
5891	1032.11	957.359	955.061	1058.64	699.909	621.455	705.364	696.591	840.812	-0.540182	0.0835496	-6.46541	1.01026e-10	2.28265e-09	ENSG00000080823	MOK	MOK protein kinase
26047	15.6975	26.8683	14.8609	27.0292	0	0	1.32587	0	10.7227	-1.79525	0.277774	-6.46298	1.02658e-10	2.31624e-09	ENSG00000174469	CNTNAP2	contactin associated protein like 2
26019	1297.99	1289.68	1231.47	1115.71	1696.99	1721.64	1885.39	1773.4	1501.53	0.505849	0.0783245	6.45838	1.0583e-10	2.38446e-09	ENSG00000151461	UPF2	UPF2, regulator of nonsense mediated mRNA decay
3110	85.3553	122.557	100.063	85.5925	32.2584	26.9709	30.4951	44.7877	66.01	-1.30747	0.202679	-6.45094	1.11156e-10	2.50093e-09	ENSG00000130675	MNX1	motor neuron and pancreas homeobox 1
9902	5525.53	7642.85	6032.54	6602.63	4209.23	3862.46	4318.36	3900.34	5261.74	-0.642162	0.0996185	-6.44621	1.1468e-10	2.5766e-09	ENSG00000011028	MRC2	mannose receptor C type 2
23531	859.44	796.149	859.951	717.775	505.381	534.923	506.483	566.04	668.268	-0.597669	0.0927299	-6.44526	1.154e-10	2.58913e-09	ENSG00000108960	MMD	monocyte to macrophage differentiation associated
9448	4955.51	5885.1	4796.11	4811.2	3514.21	3483.74	3644.82	3294.28	4298.12	-0.54144	0.0840642	-6.44079	1.18853e-10	2.66287e-09	ENSG00000071054	MAP4K4	mitogen-activated protein kinase kinase kinase kinase 4
752	737.784	823.96	759.888	647.199	479.966	501.209	453.448	468.841	609.037	-0.626703	0.0973392	-6.43834	1.20789e-10	2.70246e-09	ENSG00000184922	FMNL1	formin like 1
9111	526.848	405.381	489.419	483.522	276.64	303.423	274.455	272.538	379.028	-0.720274	0.111942	-6.43438	1.23977e-10	2.76992e-09	ENSG00000123609	NMI	N-myc and STAT interactor
1981	12639.5	15629.3	12789.3	13100.2	9319.74	9803.93	8691.09	8505.85	11309.9	-0.562149	0.0874032	-6.43168	1.26205e-10	2.81575e-09	ENSG00000114867	EIF4G1	eukaryotic translation initiation factor 4 gamma 1
55258	94.1852	146.597	117.897	147.159	54.7415	48.3229	46.4055	48.5994	87.9884	-1.1814	0.183731	-6.43006	1.27551e-10	2.84182e-09	ENSG00000144115	THNSL2	threonine synthase like 2
51232	9838.42	13771.6	9510.98	11509.9	7090.98	6825.89	5489.11	5351.65	8673.58	-0.804902	0.125217	-6.42805	1.29255e-10	2.87579e-09	ENSG00000150938	CRIM1	cysteine rich transmembrane BMP regulator 1
1958	549.413	771.638	519.141	563.108	331.381	353.993	253.242	263.009	450.616	-0.930575	0.144811	-6.42613	1.30895e-10	2.90824e-09	ENSG00000120738	EGR1	early growth response 1
10622	362.024	339.86	349.727	354.383	491.696	556.275	570.125	539.358	445.431	0.600478	0.0934562	6.42523	1.31672e-10	2.92143e-09	ENSG00000113356	POLR3G	RNA polymerase III subunit G
8100	259.009	191.378	235.793	214.732	410.561	350.622	457.426	405.948	315.684	0.808826	0.126044	6.41704	1.38953e-10	3.07871e-09	ENSG00000032742	IFT88	intraflagellar transport 88
85416	3.92438	1.41412	4.95364	0	13.6854	51.6942	31.8209	57.1758	20.5836	1.78546	0.278259	6.41652	1.39425e-10	3.0849e-09	ENSG00000139800	ZIC5	Zic family member 5
123920	1399.04	1314.66	1340.45	1443.06	957.976	920.382	998.382	1025.35	1174.91	-0.482881	0.0752625	-6.41596	1.39939e-10	3.09199e-09	ENSG00000140931	CMTM3	CKLF like MARVEL transmembrane domain containing 3
83716	4707.3	5676.28	4976.42	5070.98	8920.91	8535.17	7656.91	6795.34	6542.41	0.622577	0.0970719	6.41356	1.42159e-10	3.13671e-09	ENSG00000103196	CRISPLD2	cysteine rich secretory protein LCCL domain containing 2
7127	2130.94	2330	2219.23	2139.81	1508.32	1594.66	1710.37	1508.49	1892.73	-0.474385	0.0739811	-6.41225	1.43384e-10	3.15939e-09	ENSG00000185215	TNFAIP2	TNF alpha induced protein 2
2113	7335.65	8458.79	7531.51	7354.95	5559.19	5709.97	5518.28	5708.05	6647.05	-0.441429	0.0688715	-6.40946	1.46036e-10	3.21339e-09	ENSG00000134954	ETS1	ETS proto-oncogene 1, transcription factor
81704	16.6786	27.811	11.8887	25.5276	0	0	0	0	10.2382	-1.77044	0.2764	-6.40535	1.50028e-10	3.29669e-09	ENSG00000107099	DOCK8	dedicator of cytokinesis 8
4698	1679.64	1310.89	1511.85	1588.72	2280.57	2275.67	2333.53	2167.91	1893.6	0.560499	0.087526	6.4038	1.51555e-10	3.32569e-09	ENSG00000128609	NDUFA5	NADH:ubiquinone oxidoreductase subunit A5
4549	39917.8	40099.7	39890.6	30841.8	53018.1	61758.9	64287.6	74584.8	50549.9	0.718744	0.112264	6.40224	1.53118e-10	3.35538e-09	NA	RNR1	s-rRNA
7223	690.691	794.264	747.999	744.805	1138.82	1023.77	1397.47	1239.76	972.197	0.66173	0.103396	6.39995	1.5543e-10	3.40138e-09	ENSG00000133107	TRPC4	transient receptor potential cation channel subfamily C member 4
81930	1395.12	1494.72	1356.31	1325.93	1986.33	1839.64	2210.23	2037.36	1705.71	0.520432	0.0813584	6.39677	1.58693e-10	3.46806e-09	ENSG00000121621	KIF18A	kinesin family member 18A
160335	66.7145	76.8338	70.3416	72.0779	24.4382	26.9709	26.5174	16.1998	47.5118	-1.33802	0.209758	-6.37888	1.78384e-10	3.89306e-09	ENSG00000179104	TMTC2	transmembrane and tetratricopeptide repeat containing 2
401397	1339.2	1040.32	1248.32	1298.9	1760.53	1858.75	1913.23	1943.98	1550.4	0.588162	0.0922743	6.37406	1.84091e-10	4.01214e-09	ENSG00000214194	SMIM30	small integral membrane protein 30
10514	2607.75	2955.98	2736.39	2677.39	1968.74	2091.37	1791.25	1923.96	2344.1	-0.488666	0.0766908	-6.3719	1.86703e-10	4.06352e-09	ENSG00000132382	MYBBP1A	MYB binding protein 1a
55612	264.896	311.578	246.691	243.263	137.831	164.073	131.261	137.222	204.602	-0.856047	0.134446	-6.36721	1.92491e-10	4.18381e-09	ENSG00000101311	FERMT1	fermitin family member 1
23411	1089.02	1061.53	1053.14	937.012	1473.13	1483.4	1413.38	1444.64	1244.41	0.477495	0.0750449	6.36279	1.98126e-10	4.30044e-09	ENSG00000096717	SIRT1	sirtuin 1
48	1748.31	1940.64	1763.49	1771.91	1320.64	1246.28	1364.32	1288.36	1555.5	-0.463142	0.0728039	-6.3615	1.99797e-10	4.33082e-09	ENSG00000122729	ACO1	aconitase 1
59269	133.429	173.937	170.405	171.185	64.5167	94.3982	62.316	63.8463	116.754	-1.06819	0.167977	-6.35917	2.02848e-10	4.39102e-09	ENSG00000127124	HIVEP3	human immunodeficiency virus type I enhancer binding protein 3
80303	95.1663	167.809	90.1562	160.674	308.898	338.26	279.759	296.361	217.135	1.10972	0.174649	6.35399	2.09799e-10	4.53534e-09	ENSG00000115468	EFHD1	EF-hand domain family member D1
11259	713.256	887.124	698.463	734.293	1261.99	1059.73	1404.1	1316.95	1009.49	0.699431	0.110108	6.35222	2.12233e-10	4.58177e-09	ENSG00000168386	FILIP1L	filamin A interacting protein 1 like
10972	5159.58	5327.46	5029.92	4874.27	3914.02	3757.95	3888.78	3999.45	4493.93	-0.386133	0.0608022	-6.35064	2.14418e-10	4.6227e-09	ENSG00000170348	TMED10	transmembrane p24 trafficking protein 10
8440	1145.92	1206.24	1091.78	1279.38	779.089	756.309	820.715	863.354	992.849	-0.538398	0.0847947	-6.34943	2.1611e-10	4.65291e-09	ENSG00000071051	NCK2	NCK adaptor protein 2
989	8571.83	7382.65	8643.1	7836.97	11236.7	10934.5	11426.4	10954.9	9623.36	0.450617	0.0710066	6.34613	2.20793e-10	4.74734e-09	ENSG00000122545	39326	septin 7
5792	5634.43	7150.26	6407.03	5641.59	4231.71	4167.01	4142.02	3575.39	5118.68	-0.605796	0.0954738	-6.34515	2.2221e-10	4.77139e-09	ENSG00000142949	PTPRF	protein tyrosine phosphatase, receptor type F
4285	622.014	526.995	614.251	626.176	863.156	873.183	938.717	884.319	743.602	0.565381	0.0891363	6.34288	2.25505e-10	4.83565e-09	ENSG00000027001	MIPEP	mitochondrial intermediate peptidase
119504	1778.73	1291.56	1741.7	1828.98	2871.97	2964.55	2516.5	2638.66	2204.08	0.700014	0.110449	6.33791	2.32903e-10	4.98762e-09	ENSG00000166295	ANAPC16	anaphase promoting complex subunit 16
56180	733.859	649.552	684.592	608.157	922.785	1026.02	990.426	1046.32	832.713	0.558089	0.0881004	6.33469	2.37822e-10	5.08615e-09	ENSG00000101928	MOSPD1	motile sperm domain containing 1
3777	227.614	359.186	215.978	381.412	127.078	113.503	118.003	137.222	210	-1.11221	0.175613	-6.3333	2.39976e-10	5.12536e-09	ENSG00000171303	KCNK3	potassium two pore domain channel subfamily K member 3
151827	127.542	123.028	132.757	123.133	208.213	234.872	224.072	229.656	175.409	0.781926	0.123591	6.32673	2.50407e-10	5.34102e-09	ENSG00000171757	LRRC34	leucine rich repeat containing 34
161742	914.381	896.552	874.812	845.413	620.729	582.122	449.471	454.547	704.753	-0.712609	0.112684	-6.32395	2.54956e-10	5.43081e-09	ENSG00000166068	SPRED1	sprouty related EVH1 domain containing 1
337867	1333.31	1098.77	1298.84	1244.84	1814.29	1756.48	1821.75	1752.44	1515.09	0.513225	0.0811876	6.32147	2.59092e-10	5.51156e-09	ENSG00000134882	UBAC2	UBA domain containing 2
10158	381.646	297.908	366.569	369.399	178.887	195.539	182.97	224.891	274.726	-0.799647	0.126535	-6.31957	2.62297e-10	5.57234e-09	ENSG00000162366	PDZK1IP1	PDZK1 interacting protein 1
8797	166.786	203.162	199.136	163.677	103.618	79.789	75.5747	94.34	135.76	-0.966499	0.152945	-6.31925	2.62841e-10	5.57649e-09	ENSG00000104689	TNFRSF10A	TNF receptor superfamily member 10a
23234	4258.94	3417.93	3937.15	3947.77	5617.84	5451.5	5357.85	5866.23	4731.9	0.508688	0.0805358	6.3163	2.67896e-10	5.6762e-09	ENSG00000213551	DNAJC9	DnaJ heat shock protein family (Hsp40) member C9
6772	13559.7	15989.9	13613.6	13038.6	8232.73	8736.33	10099.2	9930.48	11650.1	-0.586293	0.0928473	-6.31459	2.70882e-10	5.73188e-09	ENSG00000115415	STAT1	signal transducer and activator of transcription 1
83988	11.7731	26.3969	14.8609	30.0324	0	0	0	0	10.3829	-1.74217	0.275937	-6.31366	2.72521e-10	5.75893e-09	ENSG00000104490	NCALD	neurocalcin delta
677	5483.34	5362.34	5360.82	5282.71	3615.87	3764.69	2549.65	2743.48	4270.36	-0.727376	0.115256	-6.31097	2.77292e-10	5.85203e-09	ENSG00000185650	ZFP36L1	ZFP36 ring finger protein like 1
93010	74.5632	90.0323	90.1562	93.1006	37.146	33.7136	21.214	32.3996	59.0407	-1.24631	0.197575	-6.30805	2.8257e-10	5.95556e-09	ENSG00000156966	B3GNT7	UDP-GlcNAc:betaGal beta-1,3-N-acetylglucosaminyltransferase 7
79365	675.975	856.957	700.444	672.727	401.763	443.896	351.356	482.182	573.163	-0.754625	0.119692	-6.30475	2.88667e-10	6.07606e-09	ENSG00000123095	BHLHE41	basic helix-loop-helix family member e41
56271	591.601	498.713	626.139	698.254	379.28	320.28	331.468	365.925	476.458	-0.743323	0.118008	-6.29891	2.99753e-10	6.30112e-09	ENSG00000102409	BEX4	brain expressed X-linked 4
51422	1092.94	1017.22	1095.74	1115.71	1464.33	1433.95	1573.81	1649.52	1305.4	0.494703	0.0785499	6.29795	3.01609e-10	6.33182e-09	ENSG00000106617	PRKAG2	protein kinase AMP-activated non-catalytic subunit gamma 2
54726	2224.14	2614.71	2083.5	1847	1361.69	1274.38	1491.61	1273.11	1771.27	-0.675359	0.107302	-6.294	3.09392e-10	6.48669e-09	ENSG00000164164	OTUD4	OTU deubiquitinase 4
5817	3163.05	4034.96	3427.92	3696.99	2109.5	2117.22	2467.45	2530.98	2943.51	-0.61513	0.0977682	-6.29172	3.13974e-10	6.57415e-09	ENSG00000073008	PVR	poliovirus receptor
55691	1206.75	1490.01	1372.16	1103.69	2027.39	2002.59	2027.26	1938.26	1646.01	0.604585	0.0961175	6.29006	3.17339e-10	6.6359e-09	ENSG00000151474	FRMD4A	FERM domain containing 4A
53827	1834.65	2154.18	2058.73	2181.86	1394.93	1417.1	1022.25	1197.83	1657.69	-0.680658	0.108218	-6.28971	3.18063e-10	6.64237e-09	ENSG00000089327	FXYD5	FXYD domain containing ion transport regulator 5
339263	626.92	716.016	685.583	680.235	414.471	468.62	474.662	446.924	564.179	-0.573703	0.0912443	-6.28754	3.22531e-10	6.72689e-09	ENSG00000212719	C17orf51	chromosome 17 open reading frame 51
9208	6413.42	7305.34	6031.55	6595.13	4827.03	4868.25	4546.41	4568.34	5644.43	-0.477304	0.0759268	-6.28637	3.24974e-10	6.76903e-09	ENSG00000124831	LRRFIP1	LRR binding FLII interacting protein 1
23231	803.517	1030.42	788.619	848.417	424.247	385.459	543.607	551.746	672.004	-0.818356	0.130198	-6.2855	3.26802e-10	6.79825e-09	ENSG00000091490	SEL1L3	SEL1L family member 3
688	262.934	312.049	294.246	304.829	176.932	148.34	165.734	182.01	230.884	-0.761404	0.121171	-6.28372	3.30567e-10	6.86764e-09	ENSG00000102554	KLF5	Kruppel like factor 5
54899	1203.8	1118.57	1015.5	1000.08	1575.77	1500.26	1617.56	1579.96	1326.44	0.517617	0.0824193	6.28029	3.3794e-10	7.01171e-09	ENSG00000168297	PXK	PX domain containing serine/threonine kinase like
84986	683.823	647.195	674.685	576.623	1014.67	1142.89	925.459	930.059	824.426	0.613202	0.0976448	6.27992	3.38747e-10	7.01936e-09	ENSG00000213390	ARHGAP19	Rho GTPase activating protein 19
22931	3429.91	2696.73	3284.26	3324.59	4596.33	4490.66	4742.64	4838.02	3925.39	0.539717	0.0860033	6.27553	3.48441e-10	7.21088e-09	ENSG00000099246	RAB18	RAB18, member RAS oncogene family
399818	845.704	660.865	774.749	756.818	1087.99	1192.34	1182.68	1126.36	953.438	0.581149	0.0926846	6.27018	3.60631e-10	7.4535e-09	ENSG00000203791	EEF1AKMT2	EEF1A lysine methyltransferase 2
5155	2314.4	2985.21	2314.34	2452.15	1466.29	1622.75	1437.25	1768.64	2045.13	-0.653446	0.104274	-6.26662	3.6897e-10	7.61603e-09	ENSG00000100311	PDGFB	platelet derived growth factor subunit B
4522	3810.57	3654.56	4056.04	3844.15	2811.37	3015.12	2625.23	2797.8	3326.85	-0.441678	0.0705031	-6.26466	3.73638e-10	7.68263e-09	ENSG00000100714	MTHFD1	methylenetetrahydrofolate dehydrogenase, cyclohydrolase and formyltetrahydrofolate synthetase 1
51310	257.047	309.221	262.543	339.367	171.067	142.721	156.453	165.81	225.528	-0.820316	0.13094	-6.26484	3.73218e-10	7.68263e-09	ENSG00000092096	SLC22A17	solute carrier family 22 member 17
163702	139.316	160.267	153.563	178.693	64.5167	89.903	70.2712	74.3285	116.357	-0.982236	0.156786	-6.26484	3.73209e-10	7.68263e-09	ENSG00000185436	IFNLR1	interferon lambda receptor 1
624	34.3383	26.3969	18.8238	10.5114	86.0223	66.3035	90.1593	76.2344	51.0987	1.40466	0.224368	6.26052	3.83701e-10	7.87942e-09	ENSG00000168398	BDKRB2	bradykinin receptor B2
3257	1000.72	1014.4	988.746	932.507	1422.3	1308.09	1323.22	1371.27	1170.16	0.452664	0.0723166	6.25947	3.86296e-10	7.92253e-09	ENSG00000107521	HPS1	HPS1, biogenesis of lysosomal organelles complex 3 subunit 1
10791	375.76	273.396	448.799	530.073	186.708	206.777	128.61	150.563	287.586	-1.11733	0.17856	-6.25741	3.9143e-10	8.01754e-09	ENSG00000168899	VAMP5	vesicle associated membrane protein 5
5045	2103.47	2825.88	2262.82	2432.63	1601.19	1636.24	1514.15	1446.55	1977.86	-0.61574	0.0984668	-6.25328	4.01922e-10	8.22192e-09	ENSG00000140564	FURIN	furin, paired basic amino acid cleaving enzyme
84910	856.496	1058.23	822.303	955.032	606.066	615.836	576.754	562.228	756.619	-0.625905	0.100164	-6.2488	4.13609e-10	8.45019e-09	ENSG00000153214	TMEM87B	transmembrane protein 87B
286826	633.788	612.785	635.056	591.639	858.268	875.431	908.222	845.248	745.055	0.483478	0.077419	6.24496	4.23913e-10	8.64861e-09	ENSG00000183814	LIN9	lin-9 DREAM MuvB core complex component
1002	51.9981	124.914	79.2582	130.641	24.4382	23.5995	31.8209	19.0586	60.7161	-1.48868	0.238388	-6.24478	4.24402e-10	8.64861e-09	ENSG00000179242	CDH4	cadherin 4
1869	1920.98	1675.73	1858.6	1609.74	2378.32	2519.53	2724.67	2851.17	2192.34	0.552725	0.0885705	6.24051	4.3615e-10	8.8767e-09	ENSG00000101412	E2F1	E2F transcription factor 1
57337	274.707	235.687	251.645	213.23	416.426	422.544	530.349	378.313	340.363	0.789188	0.126482	6.23951	4.38938e-10	8.9221e-09	ENSG00000138468	SENP7	SUMO specific peptidase 7
11013	49.0548	42.895	56.4714	33.0357	143.696	140.474	94.1369	102.916	82.835	1.20324	0.192851	6.23922	4.39756e-10	8.92739e-09	ENSG00000158164	TMSB15A	thymosin beta 15a
340719	109.883	111.244	98.082	96.1038	176.932	187.673	210.814	218.221	151.119	0.861307	0.138112	6.23629	4.48077e-10	9.08477e-09	ENSG00000188613	NANOS1	nanos C2HC-type zinc finger 1
10556	1258.75	934.733	1174.01	1234.33	1723.38	1723.89	1880.09	1873.46	1475.33	0.627755	0.100861	6.22394	4.84817e-10	9.80482e-09	ENSG00000148688	RPP30	ribonuclease P/MRP subunit p30
828	124.599	82.9617	112.943	93.1006	202.348	214.644	213.465	194.398	154.807	0.926386	0.148841	6.224	4.84634e-10	9.80482e-09	ENSG00000105519	CAPS	calcyphosine
8507	1770.88	2035.39	1770.43	1962.62	1225.82	1283.37	1311.29	1415.1	1596.86	-0.514664	0.0827543	-6.21918	4.99772e-10	1.00945e-08	ENSG00000171617	ENC1	ectodermal-neural cortex 1
50507	73.5822	76.3625	70.3416	102.11	15.6404	22.4758	34.4727	28.5879	52.9467	-1.3531	0.217695	-6.21558	5.11354e-10	1.03154e-08	ENSG00000086991	NOX4	NADPH oxidase 4
10398	14424.1	15608.6	14320	16678.5	22608.2	20973.3	20167.8	20663.3	18180.5	0.459682	0.0740939	6.20404	5.50306e-10	1.10872e-08	ENSG00000101335	MYL9	myosin light chain 9
10085	7765.37	8726.53	7861.42	7317.41	10940.5	10655.8	10954.4	10505.1	9340.8	0.435011	0.0702956	6.18831	6.08131e-10	1.22368e-08	ENSG00000164176	EDIL3	EGF like repeats and discoidin domains 3
4603	2398.78	2305.96	2140.96	1988.15	3035.22	3144.36	3052.16	3075.1	2642.59	0.467329	0.0755261	6.18765	6.10687e-10	1.22728e-08	ENSG00000185697	MYBL1	MYB proto-oncogene like 1
29966	1133.17	1258.1	1163.11	1138.23	850.448	873.183	826.018	813.802	1007.01	-0.474097	0.0766654	-6.18398	6.25053e-10	1.25458e-08	ENSG00000196792	STRN3	striatin 3
91010	1135.13	1627.18	1246.33	1114.2	793.752	751.814	759.725	674.674	1012.85	-0.746951	0.120805	-6.18311	6.28502e-10	1.25992e-08	ENSG00000161791	FMNL3	formin like 3
678	322.78	382.755	302.172	391.923	206.258	219.139	178.993	174.386	272.301	-0.796958	0.128908	-6.18236	6.31506e-10	1.26436e-08	ENSG00000152518	ZFP36L2	ZFP36 ring finger protein like 2
65059	1158.67	1313.72	1175	1034.62	760.516	816.994	617.856	600.346	934.715	-0.712804	0.115307	-6.18178	6.33818e-10	1.2674e-08	ENSG00000173166	RAPH1	Ras association (RalGDS/AF-6) and pleckstrin homology domains 1
60492	953.625	891.367	892.645	992.572	1265.9	1257.52	1409.4	1464.65	1140.96	0.523106	0.0846886	6.17682	6.54071e-10	1.30492e-08	ENSG00000137500	CCDC90B	coiled-coil domain containing 90B
642938	13.7353	20.7404	27.7404	25.5276	52.7864	73.0462	88.8334	75.2814	47.2114	1.37976	0.223379	6.17678	6.54214e-10	1.30492e-08	ENSG00000188916	INSYN2	inhibitory synaptic factor 2A
2665	9490.14	8718.52	9541.69	8722.92	11789	12311.1	13899.1	14454	11115.8	0.512251	0.0829899	6.17245	6.72419e-10	1.33956e-08	ENSG00000057608	GDI2	GDP dissociation inhibitor 2
6928	415.003	517.568	377.467	506.047	267.842	271.957	208.162	250.62	351.833	-0.809925	0.131255	-6.17064	6.80134e-10	1.35325e-08	ENSG00000275410	HNF1B	HNF1 homeobox B
57602	1922.95	2330.94	1980.46	1853	1388.09	1405.86	1402.77	1306.47	1698.82	-0.544222	0.0882161	-6.1692	6.86385e-10	1.36399e-08	ENSG00000055483	USP36	ubiquitin specific peptidase 36
8672	2208.45	2611.88	2332.17	2025.69	1428.17	1321.57	1693.14	1417.01	1879.76	-0.627739	0.10176	-6.16884	6.87928e-10	1.36536e-08	ENSG00000075151	EIF4G3	eukaryotic translation initiation factor 4 gamma 3
161424	1171.43	1266.58	1242.37	1175.77	920.83	821.489	873.75	779.496	1031.46	-0.506807	0.0822059	-6.16509	7.04442e-10	1.3964e-08	ENSG00000196943	NOP9	NOP9 nucleolar protein
5106	1476.55	1583.81	1454.39	1780.92	1139.8	1069.85	1056.72	1051.08	1326.64	-0.528708	0.0857997	-6.16212	7.17775e-10	1.41931e-08	ENSG00000100889	PCK2	phosphoenolpyruvate carboxykinase 2, mitochondrial
51809	1862.12	2015.59	1913.09	1946.1	1414.48	1476.66	1402.77	1493.24	1690.51	-0.41315	0.0670467	-6.16213	7.1775e-10	1.41931e-08	ENSG00000109586	GALNT7	polypeptide N-acetylgalactosaminyltransferase 7
55421	2147.62	2162.19	2105.29	2202.88	1597.28	1463.17	1669.27	1638.09	1873.22	-0.429469	0.069709	-6.16088	7.23409e-10	1.42869e-08	ENSG00000074356	NCBP3	nuclear cap binding subunit 3
352954	292.366	339.389	297.218	306.331	472.145	497.838	550.237	455.5	401.378	0.644154	0.104601	6.15821	7.35727e-10	1.45122e-08	ENSG00000239521	CASTOR3	CASTOR family member 3
147463	17.6597	21.6832	28.7311	15.0162	67.4493	55.0656	71.5971	71.4697	43.584	1.33763	0.21724	6.15741	7.39442e-10	1.45676e-08	ENSG00000154065	ANKRD29	ankyrin repeat domain 29
79132	228.595	232.858	266.506	199.716	99.7077	109.007	139.217	131.504	175.889	-0.891273	0.144797	-6.15533	7.49231e-10	1.47423e-08	ENSG00000108771	DHX58	DExH-box helicase 58
6429	1646.28	1622.94	1603.99	1525.65	1218	1167.62	1107.1	1214.03	1388.2	-0.435899	0.0708346	-6.15375	7.56697e-10	1.48709e-08	ENSG00000116350	SRSF4	serine and arginine rich splicing factor 4
79591	743.67	731.571	720.259	701.258	967.751	985.562	1120.36	1060.61	878.88	0.499456	0.0811777	6.15263	7.62089e-10	1.49584e-08	ENSG00000120029	ARMH3	armadillo-like helical domain containing 3
392255	247.236	272.454	207.062	244.764	135.876	92.1506	136.565	80.999	177.138	-1.02097	0.165979	-6.15121	7.68941e-10	1.50744e-08	ENSG00000156466	GDF6	growth differentiation factor 6
116228	1125.32	955.945	1074.94	1018.1	1419.37	1439.57	1632.15	1642.85	1288.53	0.542055	0.0882457	6.14257	8.11988e-10	1.58989e-08	ENSG00000203667	COX20	cytochrome c oxidase assembly factor COX20
22905	263.915	378.513	325.949	360.389	200.393	131.483	178.993	156.28	249.489	-0.917422	0.149421	-6.13985	8.26001e-10	1.61535e-08	ENSG00000072134	EPN2	epsin 2
1031	1311.72	1177.96	1302.81	1297.4	1777.14	1642.98	1959.64	1907.76	1547.18	0.507792	0.082722	6.13853	8.32882e-10	1.62681e-08	ENSG00000123080	CDKN2C	cyclin dependent kinase inhibitor 2C
256126	48.0737	39.5954	48.5456	63.0681	137.831	135.978	100.766	103.869	84.716	1.13569	0.185073	6.13643	8.4395e-10	1.64642e-08	ENSG00000161860	SYCE2	synaptonemal complex central element protein 2
4645	181.503	248.414	223.904	223.742	89.9324	91.0268	108.721	133.41	162.582	-0.962754	0.156976	-6.13314	8.61612e-10	1.67883e-08	ENSG00000167306	MYO5B	myosin VB
79751	1174.37	1057.76	1141.32	1141.23	763.448	840.593	645.7	751.861	939.536	-0.569068	0.0928149	-6.13121	8.7214e-10	1.69728e-08	ENSG00000177542	SLC25A22	solute carrier family 25 member 22
9466	227.614	236.629	222.914	229.748	129.033	125.864	144.52	132.457	181.098	-0.750538	0.12245	-6.12934	8.82424e-10	1.7152e-08	ENSG00000104998	IL27RA	interleukin 27 receptor subunit alpha
162461	352.213	370.499	380.439	363.393	240.472	249.481	210.814	208.692	297	-0.662282	0.10806	-6.12884	8.85231e-10	1.71857e-08	ENSG00000167105	TMEM92	transmembrane protein 92
54436	153.051	175.351	181.303	193.709	96.7751	84.2841	92.811	90.5283	133.477	-0.875948	0.143062	-6.12284	9.19197e-10	1.78235e-08	ENSG00000125089	SH3TC1	SH3 domain and tetratricopeptide repeats 1
26099	5723.71	5474.06	5545.1	5495.94	4420.37	4465.93	4157.93	4128.09	4926.39	-0.368452	0.0601982	-6.12065	9.31968e-10	1.80493e-08	ENSG00000055070	SZRD1	SUZ RNA binding domain containing 1
9340	24.5274	21.6832	16.8424	16.5178	55.719	61.8083	80.8782	59.0816	42.1322	1.33911	0.218951	6.11604	9.59321e-10	1.85565e-08	ENSG00000065325	GLP2R	glucagon like peptide 2 receptor
221336	164.824	149.897	124.832	163.677	260.022	251.729	259.871	283.973	207.353	0.76951	0.125948	6.10975	9.97845e-10	1.92784e-08	ENSG00000151917	BEND6	BEN domain containing 6
1743	4093.13	4260.27	4313.63	4173.01	2993.19	3174.7	3302.75	3328.58	3704.91	-0.391007	0.0640025	-6.10924	1.00106e-09	1.93171e-08	ENSG00000119689	DLST	dihydrolipoamide S-succinyltransferase
51441	2765.71	2585.48	2684.87	2596.3	1958.96	1987.98	1561.88	1753.39	2236.82	-0.535156	0.087613	-6.10818	1.00771e-09	1.94222e-08	ENSG00000198492	YTHDF2	YTH N6-methyladenosine RNA binding protein 2
55222	428.739	380.87	396.291	421.956	591.404	578.751	644.374	595.581	504.746	0.554681	0.0908731	6.10391	1.03508e-09	1.99255e-08	ENSG00000172731	LRRC20	leucine rich repeat containing 20
80321	353.194	300.265	305.144	300.324	500.494	447.268	611.227	550.793	421.089	0.709694	0.116321	6.10115	1.05308e-09	2.02478e-08	ENSG00000114107	CEP70	centrosomal protein 70
5069	176.597	229.559	188.238	168.182	81.1347	97.7696	111.373	85.7637	142.327	-0.951835	0.156029	-6.10038	1.05819e-09	2.03216e-08	ENSG00000182752	PAPPA	pappalysin 1
84223	193.276	193.734	214.988	163.677	304.011	310.165	371.244	332.572	260.458	0.734968	0.120509	6.09888	1.06814e-09	2.04881e-08	ENSG00000114473	IQCG	IQ motif containing G
25913	800.574	723.558	726.203	692.248	1000.99	1075.47	1302.01	1140.66	932.712	0.596819	0.0978844	6.09718	1.07954e-09	2.06818e-08	ENSG00000128513	POT1	protection of telomeres 1
3718	108.902	126.799	106.008	91.599	57.6741	35.9612	38.4503	28.5879	74.2476	-1.2194	0.200075	-6.09472	1.09628e-09	2.09774e-08	ENSG00000105639	JAK3	Janus kinase 3
6324	170.711	146.126	197.155	213.23	336.269	294.432	343.401	326.855	253.522	0.80639	0.132344	6.09314	1.10716e-09	2.11604e-08	ENSG00000105711	SCN1B	sodium voltage-gated channel beta subunit 1
9289	1436.32	2140.51	1476.18	1617.25	1044.98	988.933	905.571	965.318	1321.88	-0.735991	0.120797	-6.09281	1.10946e-09	2.11791e-08	ENSG00000205336	ADGRG1	adhesion G protein-coupled receptor G1
123096	777.028	701.875	760.878	746.306	469.213	484.353	560.844	503.147	625.455	-0.550876	0.0904214	-6.09232	1.11283e-09	2.12181e-08	ENSG00000197119	SLC25A29	solute carrier family 25 member 29
94240	92.223	82.9617	101.054	90.0973	32.2584	28.0947	49.0573	31.4467	63.3991	-1.18884	0.195214	-6.08996	1.12938e-09	2.1508e-08	ENSG00000133106	EPSTI1	epithelial stromal interaction 1
2619	99.0906	122.086	75.2953	75.0811	37.146	29.2185	35.7985	29.5408	62.9071	-1.26327	0.207599	-6.08513	1.16395e-09	2.21399e-08	ENSG00000180447	GAS1	growth arrest specific 1
94134	1088.03	939.918	959.024	937.012	1378.31	1310.34	1518.12	1467.51	1199.78	0.51896	0.0852929	6.08445	1.16892e-09	2.21818e-08	ENSG00000165322	ARHGAP12	Rho GTPase activating protein 12
220002	729.935	820.661	758.897	779.342	1115.36	1141.77	1051.42	1043.46	930.104	0.482341	0.0792734	6.08452	1.16838e-09	2.21818e-08	ENSG00000162144	CYB561A3	cytochrome b561 family member A3
4345	50.0359	59.393	40.6198	105.114	17.5955	11.2379	14.5846	11.4352	38.7519	-1.53562	0.252451	-6.08283	1.18078e-09	2.23537e-08	ENSG00000091972	CD200	CD200 molecule
10891	76.5254	71.1774	34.6754	57.0616	14.6629	5.61894	11.9328	18.1057	36.22	-1.54859	0.254578	-6.08298	1.1797e-09	2.23537e-08	ENSG00000109819	PPARGC1A	PPARG coactivator 1 alpha
3176	103.996	132.927	138.702	138.149	52.7864	48.3229	53.0349	69.5639	92.1853	-1.05981	0.174282	-6.08101	1.19427e-09	2.25824e-08	ENSG00000150540	HNMT	histamine N-methyltransferase
114876	656.353	692.447	644.963	641.193	890.527	918.135	1018.27	930.059	798.993	0.495847	0.0816117	6.07569	1.23457e-09	2.33168e-08	ENSG00000141447	OSBPL1A	oxysterol binding protein like 1A
1021	3005.1	3583.38	2626.42	2500.2	1637.36	1932.92	1168.09	1196.88	2206.29	-0.905382	0.149136	-6.07087	1.27223e-09	2.39914e-08	ENSG00000105810	CDK6	cyclin dependent kinase 6
4126	287.461	244.171	252.635	241.761	161.292	121.369	149.824	140.081	199.824	-0.791648	0.130404	-6.07073	1.27328e-09	2.39914e-08	ENSG00000109323	MANBA	mannosidase beta
3911	510.17	936.147	609.297	746.306	342.134	385.459	324.839	344.008	524.795	-0.925115	0.152425	-6.06932	1.28451e-09	2.41745e-08	ENSG00000130702	LAMA5	laminin subunit alpha 5
10121	3854.72	3721.02	3766.74	3973.29	5001.03	4880.61	5650.87	5806.2	4581.81	0.469487	0.0773695	6.06812	1.29418e-09	2.43279e-08	ENSG00000138107	ACTR1A	ARP1 actin related protein 1 homolog A
2028	58.8657	78.7193	58.4529	67.573	22.4831	16.8568	27.8433	12.3881	42.8978	-1.37783	0.227157	-6.06555	1.31503e-09	2.46908e-08	ENSG00000138792	ENPEP	glutamyl aminopeptidase
8724	3676.16	2942.78	3672.63	3678.97	4941.4	4888.48	5786.1	6001.55	4448.51	0.609572	0.100522	6.06408	1.32715e-09	2.48891e-08	ENSG00000112335	SNX3	sorting nexin 3
7581	872.194	704.703	794.563	615.665	1179.87	1150.76	1487.63	1214.99	1002.55	0.714651	0.117866	6.06326	1.33391e-09	2.49865e-08	ENSG00000189180	ZNF33A	zinc finger protein 33A
116138	2482.17	2182.93	2392.61	2327.51	3100.71	3063.45	3302.75	3128.47	2747.57	0.418551	0.0690424	6.06223	1.34251e-09	2.51182e-08	ENSG00000124702	KLHDC3	kelch domain containing 3
81792	860.421	872.041	810.415	741.801	511.246	474.239	619.182	500.288	673.704	-0.625105	0.103124	-6.06166	1.34721e-09	2.51768e-08	ENSG00000151388	ADAMTS12	ADAM metallopeptidase with thrombospondin type 1 motif 12
11319	1216.56	1193.05	1150.23	1259.86	1625.63	1666.58	2088.25	2112.64	1539.1	0.615104	0.101488	6.06083	1.35418e-09	2.52776e-08	ENSG00000122882	ECD	ecdysoneless cell cycle regulator
2180	1308.78	1391.02	1370.18	1340.95	889.549	1026.02	900.267	1018.68	1155.68	-0.486441	0.0802711	-6.05997	1.36148e-09	2.53841e-08	ENSG00000151726	ACSL1	acyl-CoA synthetase long chain family member 1
26033	203.087	198.92	222.914	196.713	289.348	378.717	372.57	359.254	277.69	0.728821	0.120286	6.05905	1.36926e-09	2.54995e-08	ENSG00000107518	ATRNL1	attractin like 1
55143	2144.67	2175.86	2085.48	1980.64	1566.97	1648.6	1492.93	1518.02	1826.65	-0.424247	0.0700447	-6.05681	1.38851e-09	2.57978e-08	ENSG00000134690	CDCA8	cell division cycle associated 8
9308	485.642	441.677	506.262	560.105	234.606	227.005	293.018	337.337	385.706	-0.810157	0.133758	-6.05689	1.38779e-09	2.57978e-08	ENSG00000112149	CD83	CD83 molecule
89848	840.799	810.762	828.248	903.977	1098.74	1186.72	1210.52	1265.49	1018.16	0.485658	0.080268	6.05045	1.44445e-09	2.68061e-08	ENSG00000197948	FCHSD1	FCH and double SH3 domains 1
6850	20.603	60.8071	12.8795	51.0552	1.95505	3.37136	0	2.85879	19.1912	-1.68418	0.278375	-6.05004	1.44814e-09	2.68434e-08	ENSG00000165025	SYK	spleen associated tyrosine kinase
439	2414.48	1965.63	2620.47	2351.54	3355.85	3460.14	3403.51	3651.63	2902.91	0.55448	0.0916909	6.04728	1.47315e-09	2.7181e-08	ENSG00000198356	ASNA1	arsA arsenite transporter, ATP-binding, homolog 1 (bacterial)
79892	3736.99	3361.36	3446.74	3306.57	4684.31	4551.34	5519.6	5668.98	4284.49	0.544977	0.0901121	6.04776	1.46869e-09	2.7181e-08	ENSG00000197771	MCMBP	minichromosome maintenance complex binding protein
55827	1818.95	1894.92	1733.77	1756.9	2499.54	2304.89	2886.42	2831.15	2215.82	0.531254	0.0878479	6.04744	1.47169e-09	2.7181e-08	ENSG00000143164	DCAF6	DDB1 and CUL4 associated factor 6
4494	262.934	222.488	297.218	297.321	162.269	146.092	108.721	107.681	200.591	-0.941859	0.155746	-6.04739	1.47207e-09	2.7181e-08	ENSG00000198417	MT1F	metallothionein 1F
1294	10912.7	11213	10310.5	11256.2	7886.68	7623.78	8722.91	7061.21	9373.37	-0.47209	0.0780818	-6.04609	1.484e-09	2.73497e-08	ENSG00000114270	COL7A1	collagen type VII alpha 1 chain
131578	50.0359	54.6793	37.6476	34.5373	143.696	125.864	123.306	84.8107	81.8222	1.19293	0.197317	6.04572	1.48742e-09	2.73813e-08	ENSG00000172061	LRRC15	leucine rich repeat containing 15
5271	999.736	1020.52	1055.12	1093.18	662.763	694.501	730.555	796.649	881.629	-0.516502	0.0854719	-6.04294	1.51327e-09	2.78249e-08	ENSG00000166401	SERPINB8	serpin family B member 8
4300	339.459	386.055	344.773	400.933	185.73	194.415	216.117	252.526	290.001	-0.749964	0.124193	-6.03872	1.55341e-09	2.85304e-08	ENSG00000171843	MLLT3	MLLT3, super elongation complex subunit
118980	489.567	520.867	505.271	495.535	710.662	733.834	685.476	807.131	618.543	0.531547	0.0880278	6.0384	1.55653e-09	2.85548e-08	ENSG00000156398	SFXN2	sideroflexin 2
80380	245.274	396.425	276.413	373.904	150.539	148.34	181.644	151.516	240.507	-0.946321	0.156991	-6.02788	1.66126e-09	3.04411e-08	ENSG00000197646	PDCD1LG2	programmed cell death 1 ligand 2
5825	1383.34	1319.37	1332.53	1267.37	1678.41	1805.93	1828.38	1901.09	1564.55	0.435359	0.0723415	6.01811	1.76469e-09	3.22995e-08	ENSG00000117528	ABCD3	ATP binding cassette subfamily D member 3
23283	1576.62	1615.87	1609.93	1557.18	2005.88	2064.4	2094.88	2130.75	1831.94	0.377378	0.0627156	6.01729	1.7736e-09	3.24254e-08	ENSG00000177613	CSTF2T	cleavage stimulation factor subunit 2 tau variant
6525	2258.48	2997.46	2352.98	2738.96	1759.55	1727.26	1686.51	1658.1	2147.41	-0.581188	0.0966568	-6.0129	1.82229e-09	3.32776e-08	ENSG00000183963	SMTN	smoothelin
8031	6384.97	7307.23	5985.97	6114.61	8802.63	8825.11	10726.3	10342.1	8061.12	0.567258	0.0943493	6.01232	1.82884e-09	3.33592e-08	ENSG00000266412	NCOA4	nuclear receptor coactivator 4
4361	848.648	854.6	848.062	780.844	1138.82	1213.69	1254.27	1092.06	1003.87	0.481124	0.0800862	6.00758	1.88312e-09	3.43101e-08	ENSG00000020922	MRE11	MRE11 homolog, double strand break repair nuclease
55954	426.776	294.137	417.096	382.914	577.718	710.234	734.533	643.227	523.329	0.769128	0.128062	6.00589	1.90285e-09	3.46301e-08	ENSG00000100319	ZMAT5	zinc finger matrin-type 5
2114	859.44	832.445	797.535	788.352	539.595	576.503	550.237	618.451	695.32	-0.508935	0.0847474	-6.00531	1.90961e-09	3.47137e-08	ENSG00000157557	ETS2	ETS proto-oncogene 2, transcription factor
7113	18.6408	33.9389	21.796	22.5243	0.977527	0	3.97762	2.85879	13.0892	-1.66945	0.278135	-6.00231	1.94528e-09	3.53219e-08	ENSG00000184012	TMPRSS2	transmembrane serine protease 2
79695	260.971	321.005	305.144	321.347	174.977	178.682	168.386	192.492	240.376	-0.719304	0.119845	-6.00192	1.94992e-09	3.53661e-08	ENSG00000119514	GALNT12	polypeptide N-acetylgalactosaminyltransferase 12
112942	527.829	498.713	455.734	488.027	677.426	707.986	735.859	785.214	609.599	0.544636	0.0907753	5.99982	1.97533e-09	3.57864e-08	ENSG00000163001	CFAP36	cilia and flagella associated protein 36
51147	374.778	301.679	420.068	396.428	614.864	628.198	605.923	572.711	489.331	0.676879	0.11284	5.99859	1.99036e-09	3.59586e-08	ENSG00000111653	ING4	inhibitor of growth family member 4
4851	402.249	572.718	387.374	414.448	278.595	209.025	222.746	178.198	333.169	-0.922014	0.153702	-5.99869	1.98912e-09	3.59586e-08	ENSG00000148400	NOTCH1	notch 1
145581	32.3761	41.4808	32.694	34.5373	7.82021	8.9903	3.97762	6.67051	21.0684	-1.55665	0.259507	-5.99849	1.99158e-09	3.59586e-08	ENSG00000165379	LRFN5	leucine rich repeat and fibronectin type III domain containing 5
219749	247.236	258.313	254.617	201.217	359.73	385.459	472.01	455.5	329.26	0.745926	0.124376	5.99734	2.00581e-09	3.61747e-08	ENSG00000175395	ZNF25	zinc finger protein 25
64859	1606.05	1680.92	1592.1	1785.43	1027.38	1102.44	1229.08	1246.43	1408.73	-0.519641	0.0867241	-5.99188	2.07428e-09	3.73674e-08	ENSG00000173559	NABP1	nucleic acid binding protein 1
144100	114.788	155.082	119.878	141.152	218.966	247.233	270.478	249.668	189.656	0.824545	0.137701	5.98794	2.12518e-09	3.81984e-08	ENSG00000166689	PLEKHA7	pleckstrin homology domain containing A7
9702	1411.8	1395.26	1338.47	1321.43	1739.02	1800.31	1922.51	1900.14	1603.62	0.420525	0.0702286	5.98794	2.12515e-09	3.81984e-08	ENSG00000166037	CEP57	centrosomal protein 57
4013	115.769	107.944	115.915	111.12	182.797	195.539	212.14	207.739	156.12	0.778128	0.130047	5.98345	2.18454e-09	3.92211e-08	ENSG00000110002	VWA5A	von Willebrand factor A domain containing 5A
51108	2306.56	2241.85	2420.35	2399.59	3113.42	2997.14	3565.27	3623.99	2833.52	0.494773	0.0826982	5.98288	2.19233e-09	3.93169e-08	ENSG00000197006	METTL9	methyltransferase like 9
6297	228.595	270.097	243.719	262.784	112.416	122.493	168.386	91.4812	187.496	-0.944033	0.157817	-5.98184	2.20636e-09	3.95243e-08	ENSG00000165821	SALL2	spalt like transcription factor 2
3730	207.011	874.869	168.424	594.642	33.2359	37.085	21.214	18.1057	244.323	-1.66025	0.277559	-5.98162	2.20926e-09	3.9532e-08	ENSG00000011201	ANOS1	anosmin 1
8572	21.5841	55.1507	40.6198	60.0649	3.91011	3.37136	2.65174	12.3881	24.9676	-1.6384	0.274085	-5.9777	2.26305e-09	4.04492e-08	ENSG00000131435	PDLIM4	PDZ and LIM domain 4
374860	21.5841	8.95609	14.8609	10.5114	58.6516	68.5511	51.709	41.9289	34.5941	1.46252	0.24499	5.96971	2.37681e-09	4.24351e-08	ENSG00000180777	ANKRD30B	ankyrin repeat domain 30B
79754	588.657	478.915	593.445	546.591	822.1	767.547	925.459	946.259	708.622	0.62825	0.105339	5.96406	2.46052e-09	4.38806e-08	ENSG00000196372	ASB13	ankyrin repeat and SOCS box containing 13
128434	14.7164	19.7977	17.8331	30.0324	56.6965	51.6942	79.5523	76.2344	43.3196	1.34994	0.226382	5.9631	2.47504e-09	4.40905e-08	ENSG00000132821	VSTM2L	V-set and transmembrane domain containing 2 like
322	931.06	885.71	974.875	917.491	1264.92	1267.63	1272.84	1212.13	1090.83	0.429574	0.0720424	5.9628	2.47959e-09	4.41224e-08	ENSG00000166313	APBB1	amyloid beta precursor protein binding family B member 1
283078	389.495	355.887	367.56	409.943	251.224	233.748	236.005	247.762	311.453	-0.620758	0.104127	-5.96154	2.49867e-09	4.44125e-08	ENSG00000150051	MKX	mohawk homeobox
51274	1116.49	1166.65	957.042	1127.72	777.134	773.166	645.7	664.192	903.511	-0.590638	0.0990919	-5.96051	2.51455e-09	4.4645e-08	ENSG00000109787	KLF3	Kruppel like factor 3
100126784	249.198	290.837	259.57	231.25	115.348	148.34	110.047	163.904	196.062	-0.871411	0.14629	-5.95672	2.5735e-09	4.56412e-08	NA	LOC100126784	uncharacterized LOC100126784
29933	71.62	91.9178	75.2953	100.609	28.3483	40.4564	26.5174	30.4937	58.1572	-1.20208	0.201936	-5.95279	2.63606e-09	4.66989e-08	ENSG00000183484	GPR132	G protein-coupled receptor 132
23770	5408.78	4856.09	5311.29	5728.69	7384.24	6956.25	7070.87	7082.17	6224.8	0.414034	0.0695608	5.95211	2.64702e-09	4.68411e-08	ENSG00000105701	FKBP8	FK506 binding protein 8
10063	627.901	414.337	659.824	726.785	1020.54	1178.85	1087.21	1182.59	862.255	0.827642	0.139179	5.94662	2.73742e-09	4.83874e-08	ENSG00000138495	COX17	cytochrome c oxidase copper chaperone COX17
220930	127.542	122.557	131.767	126.136	216.033	207.901	218.769	220.127	171.354	0.728428	0.122512	5.94575	2.75193e-09	4.859e-08	ENSG00000237036	ZEB1-AS1	ZEB1 antisense RNA 1
51008	760.349	705.174	761.869	756.818	998.055	991.181	1129.64	1094.92	899.751	0.488509	0.0821657	5.94542	2.75755e-09	4.86357e-08	ENSG00000138303	ASCC1	activating signal cointegrator 1 complex subunit 1
1848	133.429	143.769	141.674	136.648	67.4493	84.2841	54.3607	60.0346	102.706	-0.962448	0.161901	-5.94467	2.77012e-09	4.88035e-08	ENSG00000139318	DUSP6	dual specificity phosphatase 6
5660	20269.4	18486.8	20698.3	21797.5	26853.6	26797.8	26467.1	27251.9	23577.8	0.396608	0.066757	5.94108	2.83158e-09	4.97876e-08	ENSG00000197746	PSAP	prosaposin
128338	744.651	618.913	717.286	759.821	946.246	1104.68	1096.5	1154.95	892.881	0.584368	0.0983612	5.94104	2.8322e-09	4.97876e-08	ENSG00000156171	DRAM2	DNA damage regulated autophagy modulator 2
22883	4016.6	4684.04	4355.24	4401.25	2959.95	3129.75	2207.58	2156.48	3488.86	-0.704572	0.118601	-5.94067	2.83867e-09	4.98465e-08	ENSG00000171603	CLSTN1	calsyntenin 1
7412	230.557	385.583	314.06	262.784	43.9887	128.112	96.7886	133.41	199.411	-1.28203	0.21584	-5.9397	2.85543e-09	5.00859e-08	ENSG00000162692	VCAM1	vascular cell adhesion molecule 1
6710	50.0359	64.1068	30.7125	64.5698	8.79774	14.6092	13.2587	12.3881	32.3098	-1.48797	0.250545	-5.93892	2.86904e-09	5.02695e-08	ENSG00000070182	SPTB	spectrin beta, erythrocytic
6723	1576.62	1410.35	1407.82	1563.19	1026.4	1051.87	739.837	910.048	1210.77	-0.646887	0.108951	-5.93739	2.89592e-09	5.06849e-08	ENSG00000116649	SRM	spermidine synthase
119392	209.954	172.994	200.127	198.214	326.494	302.299	304.951	368.784	260.477	0.712131	0.119987	5.93509	2.93676e-09	5.13435e-08	ENSG00000156384	SFR1	SWI5 dependent homologous recombination repair protein 1
57535	46.1115	27.3396	33.6847	34.5373	75.2695	91.0268	103.418	95.293	63.3351	1.17544	0.198343	5.9263	3.09831e-09	5.41089e-08	ENSG00000116299	KIAA1324	KIAA1324
79932	1349.01	1508.87	1367.2	1295.9	941.358	1037.26	1007.66	968.176	1184.43	-0.4753	0.0802148	-5.92534	3.11646e-09	5.43664e-08	ENSG00000142687	KIAA0319L	KIAA0319 like
161357	34.3383	39.5954	39.6291	43.547	13.6854	5.61894	7.95523	3.81172	23.5226	-1.53917	0.259886	-5.92248	3.17128e-09	5.52624e-08	ENSG00000139915	MDGA2	MAM domain containing glycosylphosphatidylinositol anchor 2
9937	500.359	519.925	578.585	488.027	706.752	761.928	811.434	830.002	649.626	0.556216	0.0940546	5.91375	3.34405e-09	5.82098e-08	ENSG00000198924	DCLRE1A	DNA cross-link repair 1A
10602	2728.43	3540.48	2520.41	3278.04	1913.02	1963.26	1665.3	1979.23	2448.52	-0.653987	0.1107	-5.90776	3.46799e-09	6.03015e-08	ENSG00000163171	CDC42EP3	CDC42 effector protein 3
27244	222.709	197.505	207.062	222.24	308.898	328.146	404.391	387.842	284.849	0.717047	0.121403	5.90632	3.49839e-09	6.07642e-08	ENSG00000080546	SESN1	sestrin 1
7837	3703.64	6740.64	3865.82	5177.59	2571.87	2180.15	2858.58	2235.57	3666.73	-0.904275	0.153244	-5.90088	3.61575e-09	6.27344e-08	ENSG00000130508	PXDN	peroxidasin
79980	1983.77	1514.99	1916.07	1911.57	2640.3	2633.04	2743.23	2745.39	2261.04	0.541631	0.0920189	5.88608	3.9546e-09	6.85392e-08	ENSG00000149636	DSN1	DSN1 homolog, MIS12 kinetochore complex component
55061	198.181	163.095	202.108	163.677	269.797	325.899	373.896	323.996	252.581	0.779418	0.132502	5.88233	4.04536e-09	7.00365e-08	ENSG00000143502	SUSD4	sushi domain containing 4
3728	798.612	974.8	854.997	909.983	613.887	583.246	501.18	618.451	731.894	-0.589499	0.100356	-5.8741	4.25148e-09	7.35253e-08	ENSG00000173801	JUP	junction plakoglobin
829	8482.55	8207.08	7959.5	7724.35	9920.92	10817.6	10441.2	10603.2	9269.56	0.363109	0.0618313	5.87258	4.29071e-09	7.41236e-08	ENSG00000116489	CAPZA1	capping actin protein of muscle Z-line subunit alpha 1
5362	82.412	212.118	92.1376	138.149	43.0112	26.9709	47.7314	33.3525	84.4854	-1.38299	0.235531	-5.87179	4.31103e-09	7.43943e-08	ENSG00000076356	PLXNA2	plexin A2
55286	74.5632	70.706	63.4065	70.5762	14.6629	13.4855	23.8657	33.3525	45.5773	-1.33597	0.227623	-5.8692	4.37892e-09	7.54845e-08	ENSG00000154274	C4orf19	chromosome 4 open reading frame 19
6643	1853.29	1650.28	1865.54	1758.4	2263.95	2472.33	2436.95	2591.02	2111.47	0.446608	0.0761205	5.86712	4.43418e-09	7.63548e-08	ENSG00000205302	SNX2	sorting nexin 2
9871	3171.88	3610.72	3126.73	3114.36	2180.86	2204.87	2523.13	2373.75	2788.29	-0.479564	0.0817713	-5.8647	4.49956e-09	7.73262e-08	ENSG00000150961	SEC24D	SEC24 homolog D, COPII coat complex component
729582	34.3383	33.9389	30.7125	33.0357	3.91011	10.1141	3.97762	6.67051	19.5872	-1.54444	0.263347	-5.86467	4.50026e-09	7.73262e-08	ENSG00000231672	DIRC3	disrupted in renal carcinoma 3
8204	2869.7	3582.44	3294.17	2609.82	1908.13	1878.97	2235.42	1742.91	2515.2	-0.644947	0.11009	-5.85836	4.67467e-09	8.02368e-08	ENSG00000180530	NRIP1	nuclear receptor interacting protein 1
29126	2309.5	2659.02	2577.87	2545.25	1732.18	1689.05	1941.08	1898.24	2169.02	-0.466024	0.0795607	-5.85746	4.69989e-09	8.05833e-08	ENSG00000120217	CD274	CD274 molecule
57680	2029.89	2691.54	2079.54	1985.14	1312.82	1328.32	1576.46	1235	1779.84	-0.661664	0.112971	-5.85694	4.71487e-09	8.07536e-08	ENSG00000100888	CHD8	chromodomain helicase DNA binding protein 8
7804	676.956	687.262	672.704	570.616	401.763	422.544	482.617	413.571	541.004	-0.587533	0.100335	-5.85572	4.74945e-09	8.12588e-08	ENSG00000157193	LRP8	LDL receptor related protein 8
23530	1401.99	1340.11	1392.96	1129.22	2029.35	1952.02	1938.42	1746.72	1616.35	0.525117	0.0897179	5.85298	4.82849e-09	8.25227e-08	ENSG00000112992	NNT	nicotinamide nucleotide transhydrogenase
55586	180.522	132.927	134.739	169.683	71.3594	34.8374	80.8782	57.1758	107.765	-1.14335	0.195404	-5.85122	4.87978e-09	8.33103e-08	ENSG00000100253	MIOX	myo-inositol oxygenase
51116	1063.51	1047.86	1034.32	1138.23	787.886	777.661	702.712	800.461	919.08	-0.46703	0.0798372	-5.84978	4.92212e-09	8.39437e-08	ENSG00000122140	MRPS2	mitochondrial ribosomal protein S2
84893	1372.55	1171.36	1350.36	1183.28	1775.19	1723.89	1858.87	1749.58	1523.14	0.474694	0.0811859	5.847	5.00524e-09	8.52704e-08	ENSG00000134452	FBH1	F-box DNA helicase 1
10484	7168.86	7589.58	7018.31	6856.41	5726.35	5345.86	5577.94	5130.57	6301.74	-0.389613	0.0666394	-5.84659	5.01755e-09	8.5389e-08	ENSG00000100934	SEC23A	Sec23 homolog A, coat complex II component
574036	146.183	105.588	140.683	136.648	214.078	255.1	263.849	235.374	187.188	0.823917	0.141	5.84337	5.11566e-09	8.69663e-08	ENSG00000203706	SERTAD4-AS1	SERTAD4 antisense RNA 1
2733	884.948	887.596	862.923	818.384	1126.11	1169.86	1180.03	1181.63	1013.94	0.420641	0.0720231	5.84037	5.20859e-09	8.8452e-08	ENSG00000119392	GLE1	GLE1, RNA export mediator
1174	2263.39	1831.76	2414.4	2417.61	3328.48	3366.87	3117.12	3499.16	2779.85	0.561186	0.0961286	5.83787	5.28728e-09	8.96931e-08	ENSG00000106367	AP1S1	adaptor related protein complex 1 subunit sigma 1
6944	1009.55	915.878	1068	1090.18	1375.38	1399.12	1606.96	1660.96	1265.75	0.551594	0.0944925	5.83744	5.30086e-09	8.98283e-08	ENSG00000163159	VPS72	vacuolar protein sorting 72 homolog
80314	708.351	782.008	746.017	657.711	1013.69	1006.91	1300.68	1156.86	921.529	0.602463	0.103225	5.83643	5.33314e-09	9.02797e-08	ENSG00000120616	EPC1	enhancer of polycomb homolog 1
2139	0	0.942747	0	0	16.618	13.4855	11.9328	23.8232	8.35028	1.60637	0.275282	5.83535	5.36765e-09	9.07677e-08	ENSG00000064655	EYA2	EYA transcriptional coactivator and phosphatase 2
399821	18.6408	13.6698	12.8795	13.5146	36.1685	59.5608	54.3607	56.2228	33.1272	1.37658	0.236072	5.83122	5.50239e-09	9.2948e-08	ENSG00000224023	FLJ37035	uncharacterized LOC399821
4303	99.0906	147.54	141.674	124.635	242.427	224.758	307.602	233.468	190.149	0.88397	0.151637	5.82951	5.5592e-09	9.38085e-08	ENSG00000184481	FOXO4	forkhead box O4
57568	292.366	312.52	303.162	229.748	441.842	480.981	586.035	452.642	387.412	0.730986	0.125442	5.8273	5.63298e-09	9.49509e-08	ENSG00000116991	SIPA1L2	signal induced proliferation associated 1 like 2
1482	15.6975	47.6087	17.8331	64.5698	0.977527	3.37136	1.32587	4.76465	19.5186	-1.62274	0.278479	-5.82713	5.63877e-09	9.49509e-08	ENSG00000183072	NKX2-5	NK2 homeobox 5
6624	8240.22	9848.87	8274.55	9256	6846.6	6317.94	5669.43	5959.62	7551.65	-0.509471	0.0874712	-5.82444	5.73034e-09	9.63914e-08	ENSG00000075618	FSCN1	fascin actin-bundling protein 1
5368	19.6219	20.7404	25.7589	12.013	73.3145	47.1991	76.9006	59.0816	41.8287	1.3211	0.226855	5.82356	5.76079e-09	9.67656e-08	ENSG00000168081	PNOC	prepronociceptin
112817	228.595	268.211	304.153	288.311	471.168	470.867	408.369	414.524	356.775	0.669214	0.114917	5.82344	5.76468e-09	9.67656e-08	ENSG00000241935	HOGA1	4-hydroxy-2-oxoglutarate aldolase 1
55898	2342.86	2319.16	2432.23	2611.32	1901.29	1773.34	1661.32	1793.41	2104.37	-0.434392	0.0746523	-5.81887	5.92477e-09	9.93485e-08	ENSG00000140553	UNC45A	unc-45 myosin chaperone A
84929	49.0548	71.1774	52.5085	66.0714	141.741	115.75	145.846	120.069	95.2773	0.999049	0.17194	5.81047	6.22991e-09	1.04356e-07	ENSG00000130720	FIBCD1	fibrinogen C domain containing 1
9369	215.841	304.507	218.951	240.26	131.966	138.226	78.2264	112.446	180.053	-0.977418	0.168236	-5.80982	6.25407e-09	1.04651e-07	ENSG00000021645	NRXN3	neurexin 3
25819	330.629	424.707	264.524	282.305	197.46	149.464	157.779	141.987	243.607	-0.926164	0.159464	-5.80796	6.32379e-09	1.05707e-07	ENSG00000151014	NOCT	nocturnin
7498	169.73	206.461	146.628	177.191	107.528	73.0462	68.9453	80.0461	128.697	-0.975199	0.168064	-5.80255	6.53146e-09	1.09064e-07	ENSG00000158125	XDH	xanthine dehydrogenase
85236	444.436	485.986	444.836	615.665	777.134	738.329	902.919	807.131	652.055	0.669936	0.115464	5.80215	6.54706e-09	1.09211e-07	ENSG00000197903	HIST1H2BK	histone cluster 1 H2B family member k
5440	2046.56	1461.26	1982.44	1877.03	2720.46	2763.39	2830.74	3082.73	2345.58	0.608337	0.104893	5.79958	6.64795e-09	1.10778e-07	ENSG00000147669	POLR2K	RNA polymerase II subunit K
81876	5825.74	5920.45	6634.9	6060.55	7805.55	8003.62	8258.86	7879.77	7048.68	0.380962	0.0657228	5.7965	6.77147e-09	1.12719e-07	ENSG00000174903	RAB1B	RAB1B, member RAS oncogene family
2948	404.211	334.675	426.013	385.917	549.37	594.484	608.575	628.933	491.522	0.602062	0.10392	5.79349	6.89369e-09	1.14634e-07	ENSG00000168765	GSTM4	glutathione S-transferase mu 4
9698	2191.77	2540.7	2360.9	2196.87	1735.11	1686.81	1759.43	1608.55	2010.02	-0.445957	0.0770301	-5.78939	7.06433e-09	1.1735e-07	ENSG00000134644	PUM1	pumilio RNA binding family member 1
79982	1719.86	1851.55	1496.99	1435.55	1139.8	1146.26	1027.55	1016.78	1354.29	-0.570527	0.0985571	-5.7888	7.08899e-09	1.17638e-07	ENSG00000164031	DNAJB14	DnaJ heat shock protein family (Hsp40) member B14
80201	582.771	583.089	594.436	605.154	761.493	895.659	826.018	921.483	721.263	0.513307	0.0887343	5.78476	7.26167e-09	1.20378e-07	ENSG00000156510	HKDC1	hexokinase domain containing 1
26499	1201.84	969.143	1191.84	1192.29	665.696	750.69	794.197	790.932	944.579	-0.579245	0.10029	-5.77569	7.66392e-09	1.26915e-07	ENSG00000100558	PLEK2	pleckstrin 2
3489	1362.74	1117.63	1546.52	1378.49	2026.41	1937.41	2015.33	2176.49	1695.13	0.576468	0.0998138	5.77544	7.67531e-09	1.26972e-07	ENSG00000167779	IGFBP6	insulin like growth factor binding protein 6
645638	71.62	34.4102	86.1933	75.0811	241.449	248.357	141.868	152.469	131.431	1.26929	0.219895	5.77224	7.82241e-09	1.29272e-07	ENSG00000261040	WFDC21P	WAP four-disulfide core domain 21, pseudogene
4752	296.291	276.696	250.654	298.823	410.561	438.277	409.694	458.359	354.919	0.596187	0.103318	5.77042	7.90745e-09	1.30542e-07	ENSG00000136098	NEK3	NIMA related kinase 3
3646	9922.8	8286.27	9193.95	9422.68	11746	12634.7	12493.7	13308.6	10876.1	0.438446	0.0759912	5.76969	7.94157e-09	1.3097e-07	ENSG00000104408	EIF3E	eukaryotic translation initiation factor 3 subunit E
114818	107.92	186.664	133.748	163.677	72.337	60.6846	63.6419	62.8933	106.446	-1.04871	0.181902	-5.76527	8.15266e-09	1.34313e-07	ENSG00000119771	KLHL29	kelch like family member 29
5690	4872.12	4750.03	4644.53	4758.64	3760.54	3739.97	3286.84	3678.31	4186.37	-0.388812	0.067457	-5.76385	8.22188e-09	1.35314e-07	ENSG00000126067	PSMB2	proteasome subunit beta 2
286144	621.033	609.957	643.973	576.623	810.369	840.593	885.682	877.648	733.235	0.464941	0.0806935	5.76182	8.3211e-09	1.36806e-07	ENSG00000205133	TRIQK	triple QxxK/R motif containing
79147	732.878	878.64	815.368	821.387	547.415	568.637	574.103	579.381	689.726	-0.506643	0.0879378	-5.76138	8.34304e-09	1.37026e-07	ENSG00000181027	FKRP	fukutin related protein
3659	596.506	588.745	724.221	656.209	422.291	413.554	379.199	451.689	529.052	-0.594712	0.103239	-5.76054	8.3845e-09	1.37566e-07	ENSG00000125347	IRF1	interferon regulatory factor 1
10964	13.7353	14.6126	20.8053	25.5276	0	0	2.65174	0	9.66656	-1.59593	0.277081	-5.75981	8.42085e-09	1.38021e-07	ENSG00000137959	IFI44L	interferon induced protein 44 like
57088	46.1115	39.5954	27.7404	42.0454	10.7528	4.49515	10.607	7.62344	23.6214	-1.48679	0.258155	-5.75929	8.44662e-09	1.38167e-07	ENSG00000114698	PLSCR4	phospholipid scramblase 4
760	26.4896	22.1545	22.7867	31.5341	4.88763	0	0	4.76465	14.0771	-1.59849	0.277551	-5.75929	8.44705e-09	1.38167e-07	ENSG00000104267	CA2	carbonic anhydrase 2
79053	1128.26	1166.18	1149.24	1142.73	1475.09	1499.13	1653.36	1766.73	1372.59	0.468467	0.0813674	5.75742	8.54078e-09	1.39415e-07	ENSG00000159063	ALG8	ALG8, alpha-1,3-glucosyltransferase
10157	287.461	256.427	280.376	201.217	148.584	150.588	129.935	144.845	199.929	-0.787715	0.136815	-5.75752	8.53599e-09	1.39415e-07	ENSG00000008311	AASS	aminoadipate-semialdehyde synthase
55333	841.78	909.75	747.008	777.84	579.673	576.503	556.866	528.876	689.787	-0.536152	0.0931988	-5.75278	8.77873e-09	1.43153e-07	ENSG00000213463	SYNJ2BP	synaptojanin 2 binding protein
10611	2554.77	3469.31	2311.37	2768.99	1709.69	1782.33	1775.34	1719.08	2261.36	-0.641915	0.11159	-5.75244	8.79644e-09	1.43296e-07	ENSG00000163110	PDLIM5	PDZ and LIM domain 5
9748	2603.83	2957.87	2563.01	2264.45	3602.19	3643.32	4079.71	3723.1	3179.68	0.517661	0.0899936	5.7522	8.80873e-09	1.43331e-07	ENSG00000065613	SLK	STE20 like kinase
873	303.158	285.652	311.088	420.454	91.8875	149.464	133.913	201.068	237.086	-1.04423	0.181541	-5.75206	8.8165e-09	1.43331e-07	ENSG00000159228	CBR1	carbonyl reductase 1
56252	1656.09	2180.57	1719.9	1680.32	1254.17	1228.3	1068.65	977.706	1470.71	-0.6492	0.112927	-5.74883	8.98637e-09	1.45944e-07	ENSG00000119596	YLPM1	YLP motif containing 1
64430	1555.04	1642.74	1572.28	1467.08	1042.04	1081.08	1172.07	1213.08	1343.18	-0.460749	0.0801872	-5.74591	9.14273e-09	1.48333e-07	ENSG00000126773	PCNX4	pecanex 4
597	28.4518	25.4542	36.6569	49.5535	6.84269	4.49515	9.2811	2.85879	20.4493	-1.54632	0.269167	-5.74483	9.20122e-09	1.49131e-07	ENSG00000140379	BCL2A1	BCL2 related protein A1
9975	1489.3	1465.5	1340.45	1318.42	1890.54	1914.93	2147.91	1856.31	1677.92	0.463139	0.080635	5.74365	9.26589e-09	1.50027e-07	ENSG00000174738	NR1D2	nuclear receptor subfamily 1 group D member 2
8609	1047.81	1488.6	1010.54	1141.23	743.898	745.071	682.824	659.427	939.925	-0.694462	0.12092	-5.74316	9.29244e-09	1.50305e-07	ENSG00000118263	KLF7	Kruppel like factor 7
5021	1070.38	1786.98	996.671	1630.76	680.358	574.256	719.948	761.391	1027.59	-0.91377	0.159126	-5.74245	9.33187e-09	1.5079e-07	ENSG00000180914	OXTR	oxytocin receptor
9388	176.597	278.11	179.322	289.813	115.348	105.636	104.744	103.869	169.18	-0.985557	0.17175	-5.73832	9.56207e-09	1.54354e-07	ENSG00000101670	LIPG	lipase G, endothelial type
90853	667.145	856.485	752.953	949.025	516.134	492.219	450.796	532.688	652.181	-0.660855	0.115269	-5.73317	9.85733e-09	1.58959e-07	ENSG00000134668	SPOCD1	SPOC domain containing 1
149076	718.162	748.069	636.047	642.694	509.291	455.134	412.346	410.713	566.557	-0.598669	0.104425	-5.73299	9.8677e-09	1.58966e-07	ENSG00000160094	ZNF362	zinc finger protein 362
6713	1813.06	2024.55	1664.42	1932.59	1289.36	1218.19	1279.47	1420.82	1580.31	-0.500718	0.0873617	-5.73155	9.95176e-09	1.60159e-07	ENSG00000104549	SQLE	squalene epoxidase
10507	121.656	136.698	153.563	114.123	63.5392	75.2938	58.3384	51.4582	96.8337	-0.976386	0.170391	-5.73027	1.0027e-08	1.61209e-07	ENSG00000187764	SEMA4D	semaphorin 4D
8813	2734.31	2037.75	2498.61	2723.94	3520.07	3661.3	3805.25	4105.22	3135.81	0.576389	0.100593	5.72992	1.00479e-08	1.61383e-07	ENSG00000000419	DPM1	dolichyl-phosphate mannosyltransferase subunit 1, catalytic
374986	830.988	896.552	721.249	714.772	551.325	531.552	515.764	509.817	659.002	-0.571037	0.099719	-5.72646	1.02545e-08	1.64535e-07	ENSG00000180488	MIGA1	mitoguardin 1
1717	1469.68	1690.34	1664.42	1788.43	1036.18	1076.59	1243.67	1194.97	1395.54	-0.524049	0.0915369	-5.725	1.03432e-08	1.65792e-07	ENSG00000172893	DHCR7	7-dehydrocholesterol reductase
5701	3282.75	2700.5	3202.03	3132.38	4108.54	4084.97	4449.63	4490.2	3681.37	0.466823	0.0815616	5.72357	1.04309e-08	1.66863e-07	ENSG00000161057	PSMC2	proteasome 26S subunit, ATPase 2
170371	30.414	25.9255	41.6105	36.0389	72.337	78.6652	92.811	90.5283	58.5413	1.14177	0.199485	5.72359	1.04294e-08	1.66863e-07	ENSG00000204161	TMEM273	transmembrane protein 273
57089	1758.12	2419.09	1831.85	1889.04	1375.38	1263.14	1264.88	1200.69	1625.27	-0.608099	0.106265	-5.72249	1.04974e-08	1.67759e-07	ENSG00000198018	ENTPD7	ectonucleoside triphosphate diphosphohydrolase 7
5019	1944.53	1839.3	1961.64	1853	2362.68	2438.62	2557.61	2538.6	2187	0.375914	0.0657169	5.72019	1.06404e-08	1.69875e-07	ENSG00000083720	OXCT1	3-oxoacid CoA-transferase 1
54463	114.788	115.958	89.1654	136.648	51.8089	52.818	46.4055	53.3641	82.6194	-1.01517	0.177504	-5.71915	1.0706e-08	1.70752e-07	ENSG00000154153	RETREG1	reticulophagy regulator 1
3029	555.3	509.554	603.353	609.659	783.976	830.479	814.085	828.096	691.813	0.509016	0.0890652	5.7151	1.09641e-08	1.74693e-07	ENSG00000063854	HAGH	hydroxyacylglutathione hydrolase
1123	271.763	240.4	296.227	231.25	369.505	431.535	428.257	455.5	340.555	0.663812	0.116203	5.71254	1.113e-08	1.77161e-07	ENSG00000128656	CHN1	chimerin 1
2217	278.631	281.881	310.098	348.376	212.123	152.835	156.453	158.186	237.323	-0.778752	0.13635	-5.7114	1.1205e-08	1.78177e-07	ENSG00000104870	FCGRT	Fc fragment of IgG receptor and transporter
80896	56.9035	59.8644	63.4065	75.0811	117.303	126.988	156.453	121.022	97.1277	0.941207	0.164816	5.71065	1.12545e-08	1.78787e-07	ENSG00000135838	NPL	N-acetylneuraminate pyruvate lyase
1719	3578.05	3504.19	3269.4	3341.11	4263.97	4606.41	4370.07	4776.08	3963.66	0.389467	0.0682129	5.70958	1.13253e-08	1.79733e-07	ENSG00000228716	DHFR	dihydrofolate reductase
51135	316.894	295.551	301.181	339.367	481.921	447.268	440.189	489.806	389.022	0.560579	0.0981968	5.70873	1.13821e-08	1.80455e-07	ENSG00000198001	IRAK4	interleukin 1 receptor associated kinase 4
92482	443.455	350.702	392.328	476.014	684.269	690.006	612.553	617.498	533.353	0.631248	0.110582	5.7084	1.14046e-08	1.80633e-07	ENSG00000214413	BBIP1	BBSome interacting protein 1
92342	215.841	157.91	213.006	192.208	299.123	330.394	346.053	348.772	262.913	0.731696	0.128204	5.70729	1.1479e-08	1.81632e-07	ENSG00000171806	METTL18	methyltransferase like 18
8477	17.6597	26.8683	30.7125	21.0227	4.88763	1.12379	1.32587	2.85879	13.3074	-1.58168	0.27717	-5.70655	1.15292e-08	1.82246e-07	ENSG00000140030	GPR65	G protein-coupled receptor 65
5627	535.678	491.171	522.113	500.04	704.797	690.006	865.794	850.966	645.071	0.581679	0.10194	5.70612	1.15579e-08	1.8252e-07	ENSG00000184500	PROS1	protein S
801	8267.69	7164.87	7585.01	8736.44	6043.07	5841.45	5132.45	5392.63	6770.45	-0.489784	0.0858475	-5.70528	1.16152e-08	1.83243e-07	ENSG00000198668	CALM1	calmodulin 1
3855	7290.52	9371.37	7375.96	10244.1	4955.08	4661.47	5440.05	5960.57	6912.39	-0.672515	0.117893	-5.70445	1.16718e-08	1.83954e-07	ENSG00000135480	KRT7	keratin 7
6751	17.6597	24.5114	12.8795	12.013	0	0	1.32587	0	8.54868	-1.57069	0.275373	-5.70386	1.17123e-08	1.84412e-07	ENSG00000139874	SSTR1	somatostatin receptor 1
503538	39.2438	37.7099	30.7125	22.5243	9.77527	0	3.97762	2.85879	18.3503	-1.57248	0.27573	-5.70298	1.17732e-08	1.85188e-07	ENSG00000268895	A1BG-AS1	A1BG antisense RNA 1
10493	5962.12	5730.01	6244.55	5716.68	7691.18	7449.59	7446.1	7381.39	6702.7	0.337513	0.0592678	5.69472	1.23577e-08	1.94191e-07	ENSG00000108828	VAT1	vesicle amine transport 1
2303	215.841	362.957	178.331	207.224	100.685	109.007	106.07	101.963	172.76	-1.06279	0.186645	-5.69417	1.23975e-08	1.94625e-07	ENSG00000176692	FOXC2	forkhead box C2
132	1815.03	1522.06	1776.37	1925.08	2436.97	2350.96	2606.66	2677.73	2138.86	0.50642	0.088947	5.69351	1.24457e-08	1.94998e-07	ENSG00000156110	ADK	adenosine kinase
80774	2095.62	1720.04	2165.73	2102.27	1419.37	1475.53	1275.49	1372.22	1703.28	-0.526472	0.0924662	-5.69367	1.24335e-08	1.94998e-07	ENSG00000136490	LIMD2	LIM domain containing 2
388115	1726.73	1863.81	1859.59	1761.4	1386.13	1167.62	1386.86	1271.21	1552.92	-0.459639	0.0807842	-5.68971	1.27253e-08	1.99184e-07	ENSG00000188549	CCDC9B	coiled-coil domain containing 9B
63931	565.111	502.484	616.232	585.633	799.617	783.28	875.075	837.625	695.632	0.527668	0.0927989	5.68614	1.29942e-08	2.03194e-07	ENSG00000120333	MRPS14	mitochondrial ribosomal protein S14
92703	1550.13	1513.11	1601.01	1498.62	1979.49	1962.13	2301.71	2212.7	1827.36	0.446474	0.0785279	5.68554	1.30398e-08	2.03709e-07	ENSG00000163444	TMEM183A	transmembrane protein 183A
54955	512.132	472.787	534.002	555.6	363.64	338.26	318.209	357.349	431.497	-0.562701	0.0990006	-5.68381	1.31728e-08	2.05586e-07	ENSG00000116922	C1orf109	chromosome 1 open reading frame 109
5244	165.805	157.439	139.693	139.651	80.1572	77.5414	90.1593	68.6109	114.882	-0.865407	0.152328	-5.68121	1.33746e-08	2.08532e-07	ENSG00000005471	ABCB4	ATP binding cassette subfamily B member 4
9672	1609	2183.87	1804.11	1813.96	1273.72	1309.21	1201.24	1150.19	1543.16	-0.569131	0.100208	-5.67952	1.3507e-08	2.10392e-07	ENSG00000162512	SDC3	syndecan 3
718	157.956	124.443	156.535	93.1006	52.7864	58.437	67.6195	57.1758	96.0066	-1.03907	0.18316	-5.673	1.40318e-08	2.18353e-07	ENSG00000125730	C3	complement C3
5097	14.7164	24.5114	7.92582	31.5341	0	0	0	0.95293	9.95508	-1.55451	0.274034	-5.6727	1.40566e-08	2.18527e-07	ENSG00000156453	PCDH1	protocadherin 1
65108	3331.8	3065.81	3244.63	3255.52	2603.15	2390.3	2177.08	2140.28	2776.07	-0.459103	0.0809415	-5.67204	1.4111e-08	2.1916e-07	ENSG00000175130	MARCKSL1	MARCKS like 1
51013	732.878	540.194	777.721	783.847	1075.28	1100.19	1169.42	1231.18	926.339	0.664765	0.117226	5.67079	1.42138e-08	2.20541e-07	ENSG00000171311	EXOSC1	exosome component 1
100192378	95.1663	78.7193	101.054	109.618	165.202	161.825	197.555	202.974	139.014	0.86452	0.152471	5.67007	1.42741e-08	2.21262e-07	ENSG00000253661	ZFHX4-AS1	ZFHX4 antisense RNA 1
5673	4.90548	19.7977	34.6754	21.0227	59.6291	89.903	86.1817	95.293	51.426	1.43487	0.25309	5.66941	1.4329e-08	2.21684e-07	ENSG00000204941	PSG5	pregnancy specific beta-1-glycoprotein 5
54707	442.474	440.263	411.152	477.516	310.853	294.432	298.321	277.302	369.039	-0.563015	0.0993068	-5.66945	1.43258e-08	2.21684e-07	ENSG00000142751	GPN2	GPN-loop GTPase 2
64411	453.266	542.079	478.521	456.493	311.831	287.69	346.053	311.608	398.443	-0.603268	0.106415	-5.66901	1.43628e-08	2.21992e-07	ENSG00000120318	ARAP3	ArfGAP with RhoGAP domain, ankyrin repeat and PH domain 3
23641	696.578	725.915	688.555	750.811	521.999	469.743	336.771	399.277	573.706	-0.688155	0.121416	-5.66774	1.44694e-08	2.23423e-07	ENSG00000182195	LDOC1	LDOC1, regulator of NFKB signaling
577	116.75	131.042	124.832	123.133	30.3033	67.4273	57.0125	56.2228	88.3403	-1.07567	0.189802	-5.66736	1.45016e-08	2.23705e-07	ENSG00000135298	ADGRB3	adhesion G protein-coupled receptor B3
150726	334.554	415.751	335.856	382.914	234.606	235.995	228.05	220.127	298.482	-0.651278	0.114936	-5.66646	1.45774e-08	2.24658e-07	ENSG00000163013	FBXO41	F-box protein 41
115817	467.001	402.553	455.734	476.014	298.146	298.928	283.737	303.985	373.262	-0.575315	0.101552	-5.66521	1.46847e-08	2.26093e-07	ENSG00000157379	DHRS1	dehydrogenase/reductase 1
9679	494.472	509.554	489.419	482.021	711.639	794.518	713.319	646.086	605.129	0.518326	0.0915631	5.66086	1.50613e-08	2.31224e-07	ENSG00000189319	FAM53B	family with sequence similarity 53 member B
6776	632.807	645.781	579.575	552.597	434.999	378.717	344.727	419.289	498.561	-0.589998	0.104221	-5.66101	1.50481e-08	2.31224e-07	ENSG00000126561	STAT5A	signal transducer and activator of transcription 5A
54809	295.31	489.757	355.671	340.868	180.842	171.94	230.702	183.915	281.126	-0.878916	0.155257	-5.66103	1.50468e-08	2.31224e-07	ENSG00000205413	SAMD9	sterile alpha motif domain containing 9
11227	29.4329	51.8511	29.7218	27.0292	0.977527	6.74273	9.2811	4.76465	19.9751	-1.54694	0.273281	-5.66061	1.50832e-08	2.31339e-07	ENSG00000136542	GALNT5	polypeptide N-acetylgalactosaminyltransferase 5
387338	564.13	571.304	560.752	545.089	382.213	420.297	388.48	386.889	477.394	-0.496072	0.0876437	-5.6601	1.51286e-08	2.31812e-07	ENSG00000117481	NSUN4	NOP2/Sun RNA methyltransferase family member 4
5423	317.875	271.04	363.597	315.341	489.741	460.753	514.438	526.017	407.35	0.630584	0.111412	5.65993	1.51436e-08	2.3182e-07	ENSG00000070501	POLB	DNA polymerase beta
3678	2523.38	3317.52	2620.47	3123.37	1887.6	2044.17	1949.03	1952.55	2427.26	-0.547499	0.0967468	-5.65909	1.52178e-08	2.32734e-07	ENSG00000161638	ITGA5	integrin subunit alpha 5
92745	13.7353	67.8777	15.8516	66.0714	0	1.12379	2.65174	4.76465	21.5095	-1.56611	0.276875	-5.65638	1.54601e-08	2.36213e-07	ENSG00000017483	SLC38A5	solute carrier family 38 member 5
79075	421.871	356.83	401.244	426.461	565.988	560.77	681.498	656.568	508.904	0.599911	0.106081	5.65521	1.55656e-08	2.37598e-07	ENSG00000136982	DSCC1	DNA replication and sister chromatid cohesion 1
90	540.584	607.129	580.566	647.199	387.1	411.306	408.369	419.289	500.193	-0.529097	0.0935671	-5.65473	1.56088e-08	2.3803e-07	ENSG00000115170	ACVR1	activin A receptor type 1
668	75.5443	145.654	68.3602	151.664	27.3707	28.0947	43.7538	36.2113	72.0817	-1.3172	0.233123	-5.65023	1.60229e-08	2.44113e-07	ENSG00000183770	FOXL2	forkhead box L2
57761	1758.12	1679.97	1853.65	1822.97	1247.32	1290.11	1272.84	1427.49	1544.06	-0.431267	0.07633	-5.65003	1.60418e-08	2.44168e-07	ENSG00000101255	TRIB3	tribbles pseudokinase 3
3998	7153.17	7640.02	6856.82	6942	5336.32	5351.48	5623.02	5755.69	6332.31	-0.369156	0.0653595	-5.64809	1.62241e-08	2.46709e-07	ENSG00000074695	LMAN1	lectin, mannose binding 1
11037	15.6975	17.9122	11.8887	12.013	45.9437	53.9418	66.2936	39.0701	32.8451	1.34432	0.238116	5.64566	1.64552e-08	2.49748e-07	ENSG00000243244	STON1	stonin 1
9464	14.7164	29.2251	12.8795	21.0227	0	2.24758	1.32587	0	10.1771	-1.56539	0.277268	-5.64577	1.6444e-08	2.49748e-07	ENSG00000164107	HAND2	heart and neural crest derivatives expressed 2
1	25.5085	20.269	51.5178	58.5633	0	8.9903	3.97762	1.90586	21.3415	-1.57151	0.278385	-5.6451	1.65083e-08	2.50316e-07	ENSG00000121410	A1BG	alpha-1-B glycoprotein
27291	515.075	499.184	444.836	531.574	672.538	705.739	737.185	746.144	606.534	0.511239	0.0905969	5.64301	1.67107e-08	2.53145e-07	ENSG00000166024	R3HCC1L	R3H domain and coiled-coil containing 1 like
11313	1449.08	1255.27	1510.86	1566.19	992.189	992.305	835.299	1045.36	1205.82	-0.557617	0.0989044	-5.63794	1.72098e-08	2.60459e-07	ENSG00000011009	LYPLA2	lysophospholipase II
25936	941.852	862.142	922.367	995.576	1202.36	1247.4	1363	1383.65	1114.79	0.473744	0.0840728	5.63492	1.75137e-08	2.64808e-07	ENSG00000117697	NSL1	NSL1, MIS12 kinetochore complex component
4241	1681.6	1690.34	1742.69	1880.03	2298.16	2211.61	2295.08	2328.96	2016.06	0.381725	0.0677451	5.63473	1.75329e-08	2.64848e-07	ENSG00000163975	MELTF	melanotransferrin
3685	6729.33	8814.21	6432.79	6827.88	4766.42	4810.94	5082.07	4319.63	5972.91	-0.581281	0.103176	-5.63387	1.76212e-08	2.6593e-07	ENSG00000138448	ITGAV	integrin subunit alpha V
27132	288.442	225.788	264.524	229.748	144.674	142.721	161.756	119.116	197.096	-0.77711	0.137983	-5.63193	1.78205e-08	2.68685e-07	ENSG00000178773	CPNE7	copine 7
790	2240.82	2789.59	2379.73	2498.7	1757.59	1827.28	1520.78	1381.75	2049.53	-0.589451	0.104689	-5.6305	1.79684e-08	2.70659e-07	ENSG00000084774	CAD	carbamoyl-phosphate synthetase 2, aspartate transcarbamylase, and dihydroorotase
3983	731.897	832.917	758.897	612.662	1110.47	1169.86	1154.83	1015.82	923.42	0.572077	0.101616	5.62977	1.80446e-08	2.71552e-07	ENSG00000099204	ABLIM1	actin binding LIM protein 1
60312	909.475	1207.19	949.117	765.827	529.819	539.418	654.981	489.806	755.704	-0.749511	0.133162	-5.62857	1.8171e-08	2.73197e-07	ENSG00000196526	AFAP1	actin filament associated protein 1
1893	1003.66	1098.77	947.135	1000.08	1366.58	1474.41	1309.96	1460.84	1207.68	0.458274	0.0814262	5.62809	1.82214e-08	2.73697e-07	ENSG00000143369	ECM1	extracellular matrix protein 1
375444	342.402	302.622	291.274	316.842	453.572	440.525	586.035	538.405	408.96	0.656196	0.116601	5.62769	1.82634e-08	2.74071e-07	ENSG00000172244	C5orf34	chromosome 5 open reading frame 34
6385	15129.5	13370.5	15389	14945.6	10855.4	10404	7448.75	8015.09	11944.7	-0.649207	0.115385	-5.62646	1.83949e-08	2.75786e-07	ENSG00000124145	SDC4	syndecan 4
2119	519.981	567.533	521.122	528.571	361.685	394.45	283.737	304.937	435.252	-0.639413	0.11371	-5.62318	1.87475e-08	2.80809e-07	ENSG00000244405	ETV5	ETS variant 5
51703	123.618	161.681	131.767	145.657	49.8539	51.6942	76.9006	79.0932	102.533	-1.00366	0.17852	-5.6221	1.8865e-08	2.82304e-07	ENSG00000197142	ACSL5	acyl-CoA synthetase long chain family member 5
9423	101.053	121.614	96.1005	126.136	44.9662	49.4467	55.6866	56.2228	81.4033	-0.986107	0.175439	-5.6208	1.90071e-08	2.84165e-07	ENSG00000065320	NTN1	netrin 1
5737	122.637	128.214	152.572	136.648	250.247	240.491	265.174	197.256	186.655	0.767687	0.136648	5.61797	1.93215e-08	2.88596e-07	ENSG00000122420	PTGFR	prostaglandin F receptor
81607	12.7542	9.89884	18.8238	10.5114	66.4718	37.085	55.6866	39.0701	31.2877	1.39586	0.248575	5.61546	1.96043e-08	2.92547e-07	ENSG00000143217	NECTIN4	nectin cell adhesion molecule 4
5433	1101.77	1108.67	1082.86	1160.75	797.662	860.822	649.677	740.426	937.831	-0.528531	0.0941872	-5.6115	2.00582e-08	2.99041e-07	ENSG00000144231	POLR2D	RNA polymerase II subunit D
23710	434.625	386.997	481.493	424.959	621.707	610.217	686.802	635.604	535.301	0.548938	0.097854	5.60977	2.02594e-08	3.0176e-07	ENSG00000139112	GABARAPL1	GABA type A receptor associated protein like 1
23172	805.479	763.153	801.498	749.31	1030.31	1013.66	1202.57	1134.94	937.614	0.477053	0.0850613	5.60835	2.04266e-08	3.03966e-07	ENSG00000165660	ABRAXAS2	abraxas 2, BRISC complex subunit
5129	144.221	202.219	136.72	186.201	77.2246	69.6749	71.5971	97.1988	123.132	-0.966214	0.172295	-5.60789	2.04806e-08	3.04488e-07	ENSG00000117266	CDK18	cyclin dependent kinase 18
115265	23.5463	21.2118	15.8516	28.5308	2.93258	0	1.32587	3.81172	12.1513	-1.55921	0.278176	-5.60512	2.08115e-08	3.09119e-07	ENSG00000145358	DDIT4L	DNA damage inducible transcript 4 like
672	1949.44	1975.53	1985.42	1614.24	2597.29	2513.91	2906.31	2674.87	2277.13	0.491332	0.0876779	5.60384	2.09658e-08	3.11123e-07	ENSG00000012048	BRCA1	BRCA1, DNA repair associated
5366	1722.8	1670.08	1693.15	2076.74	1308.91	1269.88	1197.26	1250.24	1523.63	-0.494386	0.0883268	-5.59724	2.17792e-08	3.22893e-07	ENSG00000141682	PMAIP1	phorbol-12-myristate-13-acetate-induced protein 1
22801	570.016	1462.2	669.731	1039.12	222.876	195.539	315.558	192.492	583.442	-1.41784	0.253555	-5.59182	2.24697e-08	3.32822e-07	ENSG00000137809	ITGA11	integrin subunit alpha 11
8565	4255.01	4418.18	4027.31	4285.63	3287.42	3350.01	3148.95	3433.41	3775.74	-0.356798	0.063862	-5.58701	2.31017e-08	3.41867e-07	ENSG00000134684	YARS	tyrosyl-tRNA synthetase
79991	385.57	345.045	383.411	360.389	546.437	487.724	601.946	560.323	458.856	0.557354	0.0997724	5.58625	2.32019e-08	3.43032e-07	ENSG00000107960	STN1	STN1, CST complex subunit
1364	460.134	474.673	502.299	585.633	295.213	276.452	311.58	364.019	408.75	-0.657818	0.117816	-5.58345	2.35791e-08	3.48287e-07	ENSG00000189143	CLDN4	claudin 4
100287932	2179.99	1796.4	2241.02	2408.6	3054.77	2951.07	3424.73	3693.55	2718.77	0.58527	0.104826	5.58327	2.36036e-08	3.48328e-07	ENSG00000265354	TIMM23	translocase of inner mitochondrial membrane 23
8528	37.2816	31.1106	36.6569	34.5373	3.91011	10.1141	5.30349	10.4822	21.1745	-1.45483	0.260577	-5.58309	2.36285e-08	3.48374e-07	ENSG00000203797	DDO	D-aspartate oxidase
63877	1151.81	981.87	1068.99	1015.1	1659.84	1638.48	1349.74	1457.03	1290.36	0.519605	0.0931342	5.5791	2.41767e-08	3.5555e-07	ENSG00000165669	FAM204A	family with sequence similarity 204 member A
7376	1093.92	1068.6	1128.44	1105.19	1479	1422.72	1490.28	1377.94	1270.76	0.386816	0.0693337	5.57904	2.41843e-08	3.5555e-07	ENSG00000131408	NR1H2	nuclear receptor subfamily 1 group H member 2
10123	5203.73	4890.97	5325.16	5134.05	4030.34	4191.73	3691.23	3830.78	4537.25	-0.378213	0.0677909	-5.57911	2.41749e-08	3.5555e-07	ENSG00000188042	ARL4C	ADP ribosylation factor like GTPase 4C
1263	195.238	181.007	185.266	237.256	106.55	102.265	123.306	108.634	154.94	-0.789609	0.141535	-5.5789	2.42041e-08	3.5555e-07	ENSG00000173846	PLK3	polo like kinase 3
57153	3287.65	3094.09	3332.81	2877.11	4482.94	4142.28	4238.81	3997.54	3681.65	0.412983	0.0740602	5.57631	2.45668e-08	3.60545e-07	ENSG00000129353	SLC44A2	solute carrier family 44 member 2
23207	1573.68	1867.11	1707.02	1747.89	1234.62	1222.68	1250.3	1336.96	1492.53	-0.442479	0.0793836	-5.57393	2.49055e-08	3.65181e-07	ENSG00000116786	PLEKHM2	pleckstrin homology and RUN domain containing M2
144402	393.419	295.551	325.949	349.878	211.146	204.529	212.14	205.833	274.806	-0.670359	0.120286	-5.57302	2.50355e-08	3.66752e-07	ENSG00000139117	CPNE8	copine 8
137814	10.792	23.5687	9.90727	21.0227	0	0	0	0	8.16134	-1.51566	0.271985	-5.57258	2.50998e-08	3.67358e-07	ENSG00000180053	NKX2-6	NK2 homeobox 6
8027	929.097	868.27	807.443	750.811	1139.8	1155.25	1323.22	1223.56	1024.68	0.510035	0.0915296	5.57235	2.51327e-08	3.67502e-07	ENSG00000136738	STAM	signal transducing adaptor molecule
1739	2979.59	3202.98	3170.33	3018.26	3943.34	3993.94	4909.7	4459.71	3709.73	0.472001	0.084722	5.57117	2.5303e-08	3.69655e-07	ENSG00000075711	DLG1	discs large MAGUK scaffold protein 1
137392	467.001	349.288	403.226	480.519	641.257	703.491	619.182	728.991	549.119	0.643478	0.115695	5.56185	2.66937e-08	3.89616e-07	ENSG00000188343	FAM92A	family with sequence similarity 92 member A
728658	1733.6	1345.77	1818.97	1804.95	2324.56	2425.13	2887.75	2913.11	2156.73	0.628221	0.112982	5.56035	2.69238e-08	3.92616e-07	ENSG00000236552	RPL13AP5	ribosomal protein L13a pseudogene 5
7410	1674.73	1520.18	1558.41	1546.67	1179.87	1222.68	1214.5	1181.63	1387.34	-0.386447	0.0695035	-5.56011	2.69605e-08	3.92794e-07	ENSG00000160293	VAV2	vav guanine nucleotide exchange factor 2
1951	519.981	730.629	620.195	537.581	391.011	329.27	384.503	278.255	473.928	-0.75579	0.135945	-5.55952	2.70522e-08	3.9377e-07	ENSG00000008300	CELSR3	cadherin EGF LAG seven-pass G-type receptor 3
643911	14.7164	10.3702	15.8516	18.0195	0	0	0	0	7.36972	-1.5147	0.272723	-5.55399	2.7922e-08	4.05699e-07	ENSG00000245694	CRNDE	colorectal neoplasia differentially expressed
389336	11.7731	13.6698	13.8702	18.0195	0	0	0	0	7.16658	-1.51535	0.272839	-5.55399	2.79224e-08	4.05699e-07	ENSG00000178776	C5orf46	chromosome 5 open reading frame 46
60370	204.068	161.21	210.034	186.201	296.191	310.165	314.232	404.042	260.768	0.755887	0.13618	5.55066	2.84598e-08	4.13132e-07	ENSG00000119986	AVPI1	arginine vasopressin induced 1
847	791.744	804.634	832.211	752.313	1102.65	1023.77	1366.97	1317.9	999.025	0.573783	0.103407	5.54881	2.87624e-08	4.17146e-07	ENSG00000121691	CAT	catalase
1727	5478.44	6288.12	5394.51	5156.57	7473.19	7261.92	8090.47	8703.11	6730.79	0.485062	0.0874245	5.54835	2.88374e-08	4.17855e-07	ENSG00000100243	CYB5R3	cytochrome b5 reductase 3
6238	7223.81	10253.8	7502.78	7553.16	5616.87	5460.49	4869.93	4936.17	6677.12	-0.61371	0.110706	-5.54362	2.96286e-08	4.28931e-07	ENSG00000125844	RRBP1	ribosome binding protein 1
57466	911.438	1224.16	954.07	944.52	684.269	697.872	595.316	603.204	826.856	-0.620747	0.111978	-5.54345	2.96563e-08	4.28944e-07	ENSG00000156304	SCAF4	SR-related CTD associated factor 4
54498	1502.06	1435.8	1538.6	1783.93	1027.38	1120.42	962.583	1168.29	1317.38	-0.528646	0.0953884	-5.54204	2.98972e-08	4.32037e-07	ENSG00000088826	SMOX	spermine oxidase
1512	228.595	159.324	204.09	238.758	322.584	384.336	343.401	394.513	284.45	0.761893	0.137502	5.54095	3.00838e-08	4.34342e-07	ENSG00000103811	CTSH	cathepsin H
6451	1329.38	1320.79	1266.15	1443.06	1854.37	1667.7	2125.37	2016.4	1627.9	0.502926	0.0907712	5.5406	3.01444e-08	4.34824e-07	ENSG00000131171	SH3BGRL	SH3 domain binding glutamate rich protein like
2195	2305.57	4090.58	2755.21	2486.69	1580.66	1629.49	1687.83	1126.36	2207.8	-0.869027	0.156877	-5.53954	3.03259e-08	4.37048e-07	ENSG00000083857	FAT1	FAT atypical cadherin 1
3298	714.237	600.53	633.075	654.707	937.448	838.346	1083.24	1041.55	812.891	0.565099	0.102077	5.53601	3.09439e-08	4.45554e-07	ENSG00000025156	HSF2	heat shock transcription factor 2
3091	6519.38	7669.24	6386.23	6387.9	4639.34	4390.64	5314.09	4706.52	5751.67	-0.489109	0.0883568	-5.53562	3.10137e-08	4.46156e-07	ENSG00000100644	HIF1A	hypoxia inducible factor 1 subunit alpha
9170	124.599	128.214	156.535	157.67	50.8314	84.2841	62.316	70.5168	104.371	-0.957468	0.173056	-5.53269	3.15355e-08	4.53256e-07	ENSG00000064547	LPAR2	lysophosphatidic acid receptor 2
26147	1623.71	1653.58	1659.47	1584.21	1279.58	1149.64	1300.68	1163.53	1426.8	-0.408437	0.0738279	-5.53228	3.16098e-08	4.53916e-07	ENSG00000119403	PHF19	PHD finger protein 19
7832	152.07	124.914	139.693	126.136	211.146	223.634	259.871	228.703	183.271	0.720937	0.130334	5.53147	3.17554e-08	4.55598e-07	ENSG00000159388	BTG2	BTG anti-proliferation factor 2
109	570.016	747.598	568.677	585.633	373.415	415.802	403.065	386.889	506.387	-0.625637	0.113157	-5.52894	3.22168e-08	4.61804e-07	ENSG00000138031	ADCY3	adenylate cyclase 3
79813	1253.84	1376.41	1170.05	1196.79	885.639	850.708	966.561	887.177	1073.4	-0.469721	0.0849736	-5.52784	3.24199e-08	4.63904e-07	ENSG00000181090	EHMT1	euchromatic histone lysine methyltransferase 1
57224	172.673	296.965	217.96	219.237	122.191	122.493	98.1145	107.681	169.664	-0.916652	0.165825	-5.52783	3.24214e-08	4.63904e-07	ENSG00000135540	NHSL1	NHS like 1
4801	1153.77	987.056	1115.56	1105.19	1410.57	1523.86	1499.56	1482.76	1284.79	0.433732	0.0784802	5.52664	3.26422e-08	4.66646e-07	ENSG00000120837	NFYB	nuclear transcription factor Y subunit beta
55668	1137.09	1284.02	1204.72	1075.16	837.74	791.147	902.919	734.709	995.939	-0.514856	0.0931878	-5.52493	3.29611e-08	4.70784e-07	ENSG00000089916	GPATCH2L	G-patch domain containing 2 like
3880	7211.05	7667.83	7457.2	9457.22	5161.34	5568.37	5031.68	5910.07	6683.1	-0.534971	0.0968805	-5.52197	3.35227e-08	4.78378e-07	ENSG00000171345	KRT19	keratin 19
439990	159.919	135.755	178.331	133.644	246.337	240.491	270.478	312.561	209.689	0.764129	0.138423	5.52027	3.38485e-08	4.82597e-07	ENSG00000237523	LINC00857	long intergenic non-protein coding RNA 857
274	1400.02	1341.06	1388.01	1518.14	913.987	928.249	1005.01	1123.5	1202.25	-0.492338	0.0892013	-5.51941	3.40138e-08	4.84522e-07	ENSG00000136717	BIN1	bridging integrator 1
4088	2569.49	2774.5	2618.49	2374.06	1899.33	1967.75	1508.84	1533.26	2155.72	-0.561671	0.10186	-5.51412	3.50525e-08	4.98875e-07	ENSG00000166949	SMAD3	SMAD family member 3
11177	2255.54	2553.43	2219.23	2249.43	1652.02	1834.02	1565.85	1708.6	2004.77	-0.447898	0.0812453	-5.51292	3.52933e-08	5.01855e-07	ENSG00000198604	BAZ1A	bromodomain adjacent to zinc finger domain 1A
90557	241.349	202.219	213.997	214.732	381.235	316.908	393.784	318.278	285.313	0.660902	0.119897	5.51225	3.54282e-08	5.03325e-07	ENSG00000163040	CCDC74A	coiled-coil domain containing 74A
84879	235.463	275.282	255.608	268.79	133.921	139.35	184.296	153.422	205.766	-0.723204	0.131226	-5.51115	3.56499e-08	5.06027e-07	ENSG00000168389	MFSD2A	major facilitator superfamily domain containing 2A
9144	2538.09	2288.52	2558.06	2611.32	1576.75	1650.84	1730.26	2016.4	2121.28	-0.503458	0.0914149	-5.5074	3.64181e-08	5.16411e-07	ENSG00000108639	SYNGR2	synaptogyrin 2
8602	1847.4	1905.76	1816.99	1770.41	1439.9	1409.23	1413.38	1455.12	1632.28	-0.356987	0.0648212	-5.50726	3.64461e-08	5.16411e-07	ENSG00000087269	NOP14	NOP14 nucleolar protein
55607	139.316	170.637	151.581	120.13	62.5617	71.9224	76.9006	82.9049	109.494	-0.903683	0.164119	-5.50628	3.66499e-08	5.18839e-07	ENSG00000158528	PPP1R9A	protein phosphatase 1 regulatory subunit 9A
2135	477.793	417.165	421.059	429.464	596.291	611.341	625.812	640.369	527.412	0.491492	0.0892834	5.50486	3.69467e-08	5.22578e-07	ENSG00000162694	EXTL2	exostosin like glycosyltransferase 2
65083	1544.24	1676.2	1462.31	1531.65	1048.89	1123.79	1213.17	1163.53	1345.47	-0.44309	0.0805036	-5.50398	3.7132e-08	5.24735e-07	ENSG00000165271	NOL6	nucleolar protein 6
441518	377.722	420.465	388.365	391.923	577.718	572.008	526.371	580.334	479.363	0.498838	0.0906487	5.50298	3.73424e-08	5.26544e-07	ENSG00000212747	RTL8B	retrotransposon Gag like 8B
118429	780.952	773.052	746.017	744.805	533.729	503.457	578.08	575.569	654.458	-0.465408	0.0845751	-5.5029	3.73587e-08	5.26544e-07	ENSG00000163297	ANTXR2	ANTXR cell adhesion molecule 2
29953	164.824	325.248	148.609	238.758	97.7527	86.5317	91.4852	86.7166	154.991	-1.09104	0.198264	-5.50297	3.73454e-08	5.26544e-07	ENSG00000072657	TRHDE	thyrotropin releasing hormone degrading enzyme
29899	1049.77	1005.91	994.69	915.99	1337.26	1283.37	1430.62	1317.9	1166.94	0.424961	0.0772401	5.50182	3.759e-08	5.29338e-07	ENSG00000121957	GPSM2	G protein signaling modulator 2
4615	599.449	695.276	605.334	630.681	427.179	421.421	465.381	447.877	536.575	-0.512253	0.0931381	-5.49993	3.79945e-08	5.34564e-07	ENSG00000172936	MYD88	MYD88, innate immune signal transduction adaptor
2200	8411.91	15387.5	9233.58	9787.57	4367.59	3987.2	5131.12	3561.1	7483.45	-1.11825	0.203346	-5.49923	3.81459e-08	5.35751e-07	ENSG00000166147	FBN1	fibrillin 1
2275	445.417	461.474	392.328	424.959	276.64	292.185	293.018	298.267	360.536	-0.556455	0.101186	-5.49935	3.81198e-08	5.35751e-07	ENSG00000183386	FHL3	four and a half LIM domains 3
3714	238.406	305.45	258.58	256.777	174.977	139.35	160.43	150.563	210.567	-0.72228	0.131351	-5.49887	3.82226e-08	5.36358e-07	ENSG00000184916	JAG2	jagged 2
26470	1176.33	1463.14	1284.97	1413.03	953.088	914.763	641.722	748.05	1074.39	-0.674868	0.122744	-5.49816	3.83767e-08	5.38047e-07	ENSG00000174938	SEZ6L2	seizure related 6 homolog like 2
754	9853.14	10753.9	9898.35	10864.2	7737.12	7442.85	8038.76	8409.6	9124.75	-0.381176	0.0693508	-5.49634	3.87756e-08	5.43164e-07	ENSG00000183255	PTTG1IP	PTTG1 interacting protein
892	2888.34	2569.46	2827.53	2759.98	3464.35	3512.96	3655.43	3610.65	3161.09	0.362572	0.0659902	5.49433	3.92189e-08	5.48893e-07	ENSG00000112237	CCNC	cyclin C
64946	1744.39	1241.13	1603	1482.1	2345.09	2189.14	2173.1	2363.27	1892.65	0.561214	0.102208	5.49089	3.9992e-08	5.59224e-07	ENSG00000153044	CENPH	centromere protein H
4642	1478.51	1695.53	1447.45	1458.08	966.774	1060.86	1123.01	1149.23	1297.43	-0.489395	0.0891746	-5.48805	4.06394e-08	5.6778e-07	ENSG00000176658	MYO1D	myosin ID
9184	5239.05	4734	4945.71	5209.13	6491.75	6126.89	6659.85	6560.92	5745.91	0.356201	0.0649136	5.48731	4.08112e-08	5.69683e-07	ENSG00000154473	BUB3	BUB3, mitotic checkpoint protein
80155	3389.68	3327.42	3104.94	2907.14	2246.36	2339.73	2455.51	2469.04	2779.98	-0.414207	0.0754896	-5.48694	4.08949e-08	5.70354e-07	ENSG00000164134	NAA15	N(alpha)-acetyltransferase 15, NatA auxiliary subunit
19	528.81	651.438	541.928	457.995	337.247	368.602	316.883	256.338	432.405	-0.730063	0.133062	-5.48662	4.09686e-08	5.70883e-07	ENSG00000165029	ABCA1	ATP binding cassette subfamily A member 1
29099	1135.13	1038.91	1035.31	986.566	1401.77	1362.03	1726.29	1641.9	1290.99	0.528973	0.0964546	5.48417	4.15419e-08	5.78369e-07	ENSG00000110442	COMMD9	COMM domain containing 9
2131	3047.28	3878.46	3114.85	3498.78	2405.69	2434.12	2446.23	2320.38	2893.23	-0.483328	0.0881386	-5.48372	4.16469e-08	5.79327e-07	ENSG00000182197	EXT1	exostosin glycosyltransferase 1
51028	1101.77	1155.81	1078.9	1130.72	1458.47	1389	1540.66	1516.11	1296.43	0.39445	0.071939	5.48312	4.179e-08	5.80812e-07	ENSG00000136100	VPS36	vacuolar protein sorting 36 homolog
1389	714.237	655.68	684.592	657.711	926.695	863.069	961.257	945.306	801.069	0.437448	0.0798224	5.48026	4.24709e-08	5.89764e-07	ENSG00000111269	CREBL2	cAMP responsive element binding protein like 2
8092	128.523	82.9617	109.971	97.6054	196.483	173.063	213.465	204.88	150.869	0.844248	0.154068	5.47971	4.26033e-08	5.91088e-07	ENSG00000180318	ALX1	ALX homeobox 1
100128881	81.4309	125.385	114.924	85.5925	42.0336	46.0753	39.7762	47.6465	72.8581	-1.05636	0.192817	-5.47856	4.28799e-08	5.94411e-07	ENSG00000261373	VPS9D1-AS1	VPS9D1 antisense RNA 1
7503	13.7353	16.4981	9.90727	16.5178	0	0	0	0	7.08231	-1.4908	0.272125	-5.47836	4.29288e-08	5.94573e-07	ENSG00000229807	XIST	X inactive specific transcript
85016	84.3742	62.2213	51.5178	91.599	139.786	147.216	155.127	146.751	109.824	0.936717	0.171009	5.4776	4.31129e-08	5.96091e-07	ENSG00000137691	CFAP300	cilia and flagella associated protein 300
142678	207.011	208.818	182.294	193.709	378.303	327.022	289.04	299.22	260.677	0.670034	0.122319	5.47774	4.30797e-08	5.96091e-07	ENSG00000197530	MIB2	mindbomb E3 ubiquitin protein ligase 2
79812	111.845	120.672	112.943	97.6054	179.865	191.044	189.6	210.597	151.771	0.73597	0.134424	5.47499	4.37528e-08	6.04195e-07	ENSG00000173269	MMRN2	multimerin 2
81563	271.763	309.692	283.348	330.357	476.055	403.44	522.394	458.359	381.926	0.612336	0.111844	5.47491	4.37746e-08	6.04195e-07	ENSG00000116667	C1orf21	chromosome 1 open reading frame 21
1635	2906.99	2417.67	2704.68	2836.56	1957.99	1970	1884.06	2114.55	2349.06	-0.443046	0.0811256	-5.46123	4.72846e-08	6.52079e-07	ENSG00000129187	DCTD	dCMP deaminase
1069	1090.98	781.065	1090.79	1117.21	1563.06	1467.67	1648.06	1856.31	1326.89	0.650874	0.119267	5.4573	4.83433e-08	6.66106e-07	ENSG00000147400	CETN2	centrin 2
4316	25.5085	24.9828	26.7496	30.0324	2.93258	1.12379	2.65174	8.57637	15.3197	-1.49915	0.274759	-5.45623	4.86349e-08	6.69546e-07	ENSG00000137673	MMP7	matrix metallopeptidase 7
255403	326.705	340.803	318.023	258.279	201.37	200.034	178.993	191.539	251.968	-0.66198	0.12134	-5.45557	4.88167e-08	6.7147e-07	ENSG00000250312	ZNF718	zinc finger protein 718
92610	830.988	708.945	836.174	830.397	566.965	589.989	533.001	547.934	680.549	-0.499515	0.0915696	-5.45503	4.89647e-08	6.72928e-07	ENSG00000145365	TIFA	TRAF interacting protein with forkhead associated domain
80014	2341.87	2713.22	2324.25	2109.78	1690.14	1691.3	1768.71	1563.76	2025.38	-0.488812	0.0896244	-5.45401	4.92477e-08	6.76237e-07	ENSG00000151718	WWC2	WW and C2 domain containing 2
784	613.185	664.636	644.963	644.196	820.145	870.936	967.886	910.048	766.999	0.461448	0.0846542	5.45097	5.00947e-08	6.87277e-07	ENSG00000167535	CACNB3	calcium voltage-gated channel auxiliary subunit beta 3
8061	3766.43	4174.95	3713.24	3650.44	2953.11	2924.1	2398.5	2692.98	3284.22	-0.469163	0.0861168	-5.44799	5.09435e-08	6.98323e-07	ENSG00000175592	FOSL1	FOS like 1, AP-1 transcription factor subunit
8187	193.276	175.351	194.183	187.703	281.528	274.204	381.851	319.231	250.916	0.701813	0.128904	5.44445	5.19654e-08	7.11721e-07	ENSG00000196793	ZNF239	zinc finger protein 239
387496	26.4896	23.0973	15.8516	27.0292	68.4269	70.7986	53.0349	57.1758	42.738	1.1757	0.21624	5.43704	5.41738e-08	7.41333e-07	ENSG00000122035	RASL11A	RAS like family 11 member A
9075	70.6389	65.9923	71.3323	63.0681	33.2359	20.2282	11.9328	27.635	45.5079	-1.20829	0.222543	-5.42947	5.65204e-08	7.72783e-07	ENSG00000165376	CLDN2	claudin 2
65266	187.389	237.101	197.155	175.69	103.618	114.626	124.632	105.775	155.748	-0.786615	0.144919	-5.42796	5.70005e-08	7.78682e-07	ENSG00000126562	WNK4	WNK lysine deficient protein kinase 4
79961	136.372	147.068	164.461	151.664	77.2246	84.2841	76.9006	88.6224	115.825	-0.803097	0.148061	-5.4241	5.82475e-08	7.95038e-07	ENSG00000162777	DENND2D	DENN domain containing 2D
144363	229.576	194.677	289.292	255.276	356.797	405.687	425.605	453.594	326.313	0.723541	0.133408	5.42352	5.84353e-08	7.96922e-07	ENSG00000205707	ETFRF1	electron transfer flavoprotein regulatory factor 1
9453	963.436	848	919.395	815.381	1179.87	1213.69	1227.76	1197.83	1045.67	0.432043	0.0797284	5.41894	5.99541e-08	8.16939e-07	ENSG00000152904	GGPS1	geranylgeranyl diphosphate synthase 1
100288152	280.593	185.25	210.034	154.667	499.516	477.61	428.257	302.079	317.251	0.926613	0.171094	5.41582	6.10078e-08	8.30588e-07	ENSG00000225138	SLC9A3-AS1	SLC9A3 antisense RNA 1
389136	1121.39	1387.25	921.376	1075.16	788.864	655.168	493.224	475.512	864.744	-0.82771	0.15286	-5.41481	6.1354e-08	8.34592e-07	ENSG00000206538	VGLL3	vestigial like family member 3
84318	406.173	349.288	388.365	418.953	554.258	524.809	676.195	653.71	496.469	0.603354	0.111596	5.40658	6.42394e-08	8.73099e-07	ENSG00000120647	CCDC77	coiled-coil domain containing 77
23405	1577.6	1881.25	1540.58	1389	1128.07	1072.09	1112.41	918.624	1327.45	-0.575468	0.106451	-5.40596	6.44629e-08	8.75393e-07	ENSG00000100697	DICER1	dicer 1, ribonuclease III
26020	4075.47	5519.78	4167.99	4332.18	3249.3	2907.24	3097.24	3001.73	3793.87	-0.544167	0.100672	-5.40534	6.46847e-08	8.77659e-07	ENSG00000197324	LRP10	LDL receptor related protein 10
8888	1982.79	2330	1812.04	1937.09	1465.31	1393.5	1451.83	1423.68	1724.53	-0.480907	0.0889846	-5.40438	6.50326e-08	8.81633e-07	ENSG00000160294	MCM3AP	minichromosome maintenance complex component 3 associated protein
79723	957.549	691.976	898.589	716.274	1173.03	1323.82	1233.06	1331.24	1040.69	0.606564	0.112244	5.40399	6.51753e-08	8.82818e-07	ENSG00000152455	SUV39H2	suppressor of variegation 3-9 homolog 2
54881	1242.07	1188.33	1205.71	1189.28	942.336	911.392	937.391	922.436	1067.37	-0.371935	0.0688288	-5.40377	6.52555e-08	8.83157e-07	ENSG00000136891	TEX10	testis expressed 10
10443	987.963	863.556	910.478	949.025	1222.89	1277.75	1272.84	1198.79	1085.41	0.416315	0.0770711	5.4017	6.60111e-08	8.92628e-07	ENSG00000244754	N4BP2L2	NEDD4 binding protein 2 like 2
60681	2884.42	3312.81	2964.26	3330.6	2180.86	2082.38	2287.13	2486.19	2691.08	-0.455939	0.08444	-5.39956	6.68047e-08	9.02597e-07	ENSG00000141756	FKBP10	FK506 binding protein 10
4691	25632.1	25629.5	24697.8	25554.6	18671.7	20042.8	19173.4	21507.6	22613.7	-0.349631	0.0648354	-5.39259	6.94511e-08	9.37561e-07	ENSG00000115053	NCL	nucleolin
23089	6060.23	6947.1	5692.72	5679.14	4440.9	4696.31	3744.26	3855.55	5139.53	-0.525923	0.0975323	-5.39229	6.95647e-08	9.38302e-07	ENSG00000242265	PEG10	paternally expressed 10
22933	550.395	625.984	572.64	567.613	752.695	806.88	876.401	951.024	712.954	0.527187	0.0977949	5.39074	7.01682e-08	9.44968e-07	ENSG00000068903	SIRT2	sirtuin 2
54536	607.298	490.7	511.215	467.005	782.021	734.957	754.421	756.626	638.03	0.526293	0.0976295	5.39072	7.0177e-08	9.44968e-07	ENSG00000138190	EXOC6	exocyst complex component 6
118472	760.349	601.001	748.99	729.788	954.066	1006.91	1144.23	1210.22	894.444	0.5834	0.108269	5.38841	7.10826e-08	9.56184e-07	ENSG00000198546	ZNF511	zinc finger protein 511
55220	15.6975	12.7271	16.8424	31.5341	1.95505	1.12379	1.32587	0	10.1507	-1.49545	0.277537	-5.38829	7.11295e-08	9.56184e-07	ENSG00000162873	KLHDC8A	kelch domain containing 8A
3070	906.532	880.997	920.385	964.042	1163.26	1249.65	1195.94	1217.84	1062.33	0.390916	0.0725715	5.38663	7.17901e-08	9.64253e-07	ENSG00000119969	HELLS	helicase, lymphoid specific
4065	23.5463	25.9255	17.8331	19.5211	3.91011	4.49515	0	0	11.9039	-1.49982	0.278453	-5.38627	7.1934e-08	9.65376e-07	ENSG00000054219	LY75	lymphocyte antigen 75
2022	909.475	1133.65	938.219	924.999	669.606	706.863	677.521	666.098	828.304	-0.511352	0.0949438	-5.38584	7.21062e-08	9.66876e-07	ENSG00000106991	ENG	endoglin
55662	1454.96	1632.84	1561.39	1500.12	1919.86	2153.18	2041.84	2024.02	1786.03	0.395019	0.0733615	5.38455	7.26258e-08	9.73028e-07	ENSG00000166135	HIF1AN	hypoxia inducible factor 1 subunit alpha inhibitor
515	4791.67	3785.6	4655.43	4868.26	6050.89	6324.68	6993.97	8020.81	5686.41	0.575539	0.106892	5.38428	7.27347e-08	9.73671e-07	ENSG00000116459	ATP5PB	ATP synthase peripheral stalk-membrane subunit b
166614	524.886	612.785	459.697	584.131	377.325	334.889	364.615	326.855	448.148	-0.610803	0.113446	-5.38411	7.28055e-08	9.73805e-07	ENSG00000170390	DCLK2	doublecortin like kinase 2
9044	1832.69	1679.97	1756.56	1447.56	2349	2315	3103.87	2484.29	2121.12	0.584128	0.108562	5.3806	7.42362e-08	9.9211e-07	ENSG00000095564	BTAF1	B-TFIID TATA-box binding protein associated factor 1
5552	182.484	448.747	162.479	576.623	54.7415	57.3132	51.709	70.5168	200.577	-1.47313	0.273829	-5.37976	7.45854e-08	9.95945e-07	ENSG00000122862	SRGN	serglycin
57205	280.593	356.83	266.506	262.784	143.696	105.636	190.926	163.904	221.359	-0.870439	0.161842	-5.37834	7.51753e-08	1.00299e-06	ENSG00000145246	ATP10D	ATPase phospholipid transporting 10D (putative)
3625	26.4896	55.622	23.7774	54.0584	112.416	134.855	92.811	106.728	75.8446	1.18582	0.220551	5.37665	7.5885e-08	1.01161e-06	ENSG00000163083	INHBB	inhibin subunit beta B
56975	2503.76	2526.09	2562.02	2723.94	2092.88	1966.63	1730.26	1773.4	2234.87	-0.436632	0.0812205	-5.37588	7.62094e-08	1.01509e-06	ENSG00000177706	FAM20C	FAM20C, golgi associated secretory pathway kinase
93185	716.2	622.684	681.62	701.258	478.01	496.714	433.56	495.523	578.196	-0.495222	0.0921258	-5.37549	7.63729e-08	1.01642e-06	ENSG00000162729	IGSF8	immunoglobulin superfamily member 8
5976	2664.66	3010.66	2712.61	2672.89	2211.16	2074.51	2114.77	2017.35	2434.83	-0.3888	0.0723425	-5.37444	7.68229e-08	1.02156e-06	ENSG00000005007	UPF1	UPF1, RNA helicase and ATPase
5965	2889.33	2866.42	2751.25	2624.84	4051.85	3786.04	3774.76	3351.45	3261.99	0.417294	0.0776955	5.37089	7.83489e-08	1.04099e-06	ENSG00000004700	RECQL	RecQ like helicase
1445	1269.54	1246.78	1309.74	1399.51	930.605	991.181	714.645	709.933	1071.49	-0.612976	0.114173	-5.36884	7.92459e-08	1.05203e-06	ENSG00000103653	CSK	C-terminal Src kinase
1954	1481.45	2168.79	1732.78	1666.8	1193.56	1167.62	1168.09	1047.27	1453.3	-0.599678	0.111755	-5.366	8.05036e-08	1.06751e-06	ENSG00000105429	MEGF8	multiple EGF like domains 8
57190	2044.6	2630.26	2128.08	2048.21	1558.18	1581.17	1349.74	1161.62	1812.73	-0.619912	0.115528	-5.3659	8.05451e-08	1.06751e-06	ENSG00000162430	SELENON	selenoprotein N
25758	118.713	209.29	106.008	162.175	69.4044	51.6942	68.9453	58.1287	105.545	-1.07773	0.200936	-5.36355	8.1603e-08	1.08063e-06	ENSG00000110427	KIAA1549L	KIAA1549 like
28978	1068.41	757.497	1037.29	998.579	1552.31	1719.4	1410.73	1379.84	1240.51	0.624093	0.116374	5.36282	8.19308e-08	1.08408e-06	ENSG00000096092	TMEM14A	transmembrane protein 14A
995	692.653	610.428	604.343	569.115	808.414	878.802	1018.27	929.106	763.892	0.532198	0.0992511	5.36214	8.2244e-08	1.08732e-06	ENSG00000158402	CDC25C	cell division cycle 25C
401138	20.603	24.04	13.8702	22.5243	2.93258	2.24758	0	2.85879	11.1346	-1.4922	0.278338	-5.36111	8.27116e-08	1.0926e-06	ENSG00000187689	AMTN	amelotin
25874	1210.67	874.397	1267.14	1174.27	1686.23	1776.71	1644.08	1838.2	1433.96	0.595505	0.111122	5.359	8.3682e-08	1.10451e-06	ENSG00000143158	MPC2	mitochondrial pyruvate carrier 2
55839	2384.06	2302.66	2347.03	2548.25	3597.3	3615.23	2947.41	3120.84	2857.85	0.460782	0.0860673	5.35374	8.61541e-08	1.1362e-06	ENSG00000166451	CENPN	centromere protein N
92689	1764.01	1920.85	1766.47	1819.97	1444.78	1277.75	1413.38	1221.66	1578.61	-0.432621	0.0808281	-5.35236	8.68154e-08	1.14397e-06	ENSG00000197712	FAM114A1	family with sequence similarity 114 member A1
154043	490.548	447.333	560.752	462.5	755.628	691.13	673.543	729.944	601.422	0.525021	0.0981144	5.35111	8.74174e-08	1.15096e-06	ENSG00000153721	CNKSR3	CNKSR family member 3
55076	575.903	603.358	582.548	681.737	409.584	419.173	421.627	451.689	518.202	-0.501691	0.0937972	-5.34868	8.85993e-08	1.16556e-06	ENSG00000181458	TMEM45A	transmembrane protein 45A
117145	720.124	692.447	634.065	641.193	871.954	961.963	932.088	1084.43	817.283	0.501776	0.0938498	5.34658	8.963e-08	1.17815e-06	ENSG00000159445	THEM4	thioesterase superfamily member 4
6397	2999.21	3667.28	3361.54	3078.33	2447.73	2509.42	2330.88	2212.7	2825.89	-0.454524	0.0850468	-5.3444	9.07175e-08	1.19147e-06	ENSG00000129657	SEC14L1	SEC14 like lipid binding 1
5571	1875.85	1526.31	1943.81	1726.87	2323.58	2461.1	2561.58	2733.95	2144.13	0.497797	0.0931603	5.34344	9.11977e-08	1.19679e-06	ENSG00000181929	PRKAG1	protein kinase AMP-activated non-catalytic subunit gamma 1
5939	989.925	1352.84	1104.66	1061.65	812.325	749.567	583.384	605.11	907.432	-0.675734	0.126466	-5.34323	9.1305e-08	1.19682e-06	ENSG00000076067	RBMS2	RNA binding motif single stranded interacting protein 2
6575	1806.2	2347.91	1968.57	2241.92	1463.36	1380.01	1502.21	1500.86	1776.38	-0.502138	0.0939781	-5.34314	9.13497e-08	1.19682e-06	ENSG00000168575	SLC20A2	solute carrier family 20 member 2
1948	1333.31	1645.09	1479.16	1414.53	992.189	1066.47	1071.3	1097.77	1262.48	-0.464968	0.0870399	-5.34201	9.19231e-08	1.20237e-06	ENSG00000125266	EFNB2	ephrin B2
273	144.221	71.6487	112.943	93.1006	28.3483	50.5705	38.4503	39.0701	72.294	-1.15889	0.216933	-5.34214	9.1858e-08	1.20237e-06	ENSG00000078053	AMPH	amphiphysin
441376	22.5652	18.8549	10.898	33.0357	0.977527	0	2.65174	2.85879	11.4802	-1.48598	0.278207	-5.34129	9.22894e-08	1.20617e-06	ENSG00000205002	AARD	alanine and arginine rich domain containing protein
284443	25.5085	30.6393	20.8053	12.013	64.5167	65.1797	64.9677	63.8463	43.4346	1.17855	0.220703	5.33997	9.29641e-08	1.214e-06	ENSG00000196268	ZNF493	zinc finger protein 493
57446	1093.92	1110.08	1152.22	1057.14	1517.12	1582.29	1370.95	1428.44	1289.02	0.409726	0.0767444	5.33884	9.35425e-08	1.22026e-06	ENSG00000101079	NDRG3	NDRG family member 3
29089	1614.88	1146.38	1639.65	1689.33	2415.47	2492.56	2219.51	2317.52	1941.91	0.608505	0.113979	5.33874	9.3596e-08	1.22026e-06	ENSG00000077152	UBE2T	ubiquitin conjugating enzyme E2 T
8723	1545.23	1308.53	1408.81	1282.39	1818.2	1819.41	1980.85	2041.18	1650.57	0.454592	0.0852922	5.32982	9.83112e-08	1.28069e-06	ENSG00000114520	SNX4	sorting nexin 4
529	2705.86	2459.15	2735.4	3139.89	3783.03	3695.02	3700.51	3866.99	3260.73	0.439043	0.082389	5.3289	9.88069e-08	1.2861e-06	ENSG00000131100	ATP6V1E1	ATPase H+ transporting V1 subunit E1
114804	326.705	374.742	318.023	310.836	508.314	505.705	499.854	461.218	413.174	0.540158	0.101406	5.32669	1.00017e-07	1.30079e-06	ENSG00000141576	RNF157	ring finger protein 157
5214	7741.82	8570.04	8477.65	8263.43	10320.7	10051.2	10974.2	11289.4	9461.05	0.361556	0.0678812	5.32631	1.00228e-07	1.30247e-06	ENSG00000067057	PFKP	phosphofructokinase, platelet
400043	130.486	114.544	102.045	121.631	56.6965	65.1797	45.0796	62.8933	87.3194	-0.909479	0.170825	-5.32405	1.01481e-07	1.31769e-06	ENSG00000250742	LINC02381	long intergenic non-protein coding RNA 2381
664	2422.32	2087.71	2483.75	2372.56	3061.61	3009.5	3350.48	3599.21	2798.4	0.464578	0.0872808	5.3228	1.02181e-07	1.3257e-06	ENSG00000176171	BNIP3	BCL2 interacting protein 3
9397	1864.08	1760.11	1800.15	1777.92	2608.04	2638.65	2142.61	2421.39	2126.62	0.436845	0.0821202	5.31958	1.04006e-07	1.34828e-06	ENSG00000152465	NMT2	N-myristoyltransferase 2
57480	21.5841	46.666	25.7589	36.0389	7.82021	5.61894	7.95523	2.85879	19.2876	-1.44342	0.271355	-5.3193	1.04166e-07	1.34927e-06	ENSG00000120278	PLEKHG1	pleckstrin homology and RhoGEF domain containing G1
400745	396.363	298.379	337.838	315.341	199.415	207.901	188.274	228.703	271.527	-0.666513	0.125321	-5.31844	1.04662e-07	1.35459e-06	ENSG00000189410	SH2D5	SH2 domain containing 5
79624	1777.74	1598.43	1685.23	1732.87	2144.69	2203.75	2158.52	2184.11	1935.67	0.352133	0.0662449	5.31563	1.06291e-07	1.37456e-06	ENSG00000146476	ARMT1	acidic residue methyltransferase 1
7011	428.739	458.175	413.133	412.946	296.191	292.185	306.276	240.138	355.973	-0.577772	0.1087	-5.31529	1.06489e-07	1.37602e-06	ENSG00000129566	TEP1	telomerase associated protein 1
23157	758.387	798.506	788.619	773.335	1061.59	1048.49	986.449	1013.92	903.663	0.390451	0.0735028	5.31205	1.08399e-07	1.39956e-06	ENSG00000125354	38961	septin 6
80255	1254.82	1480.11	1212.65	1258.36	973.616	906.897	957.28	902.424	1118.27	-0.468184	0.0881463	-5.31144	1.08762e-07	1.40312e-06	ENSG00000115084	SLC35F5	solute carrier family 35 member F5
1947	570.998	631.64	592.455	540.584	413.494	384.336	440.189	402.136	496.979	-0.501888	0.0945021	-5.31087	1.09105e-07	1.40641e-06	ENSG00000090776	EFNB1	ephrin B1
6480	19.6219	38.6526	7.92582	27.0292	2.93258	0	0	1.90586	12.2585	-1.46659	0.276204	-5.3098	1.09748e-07	1.41356e-06	ENSG00000073849	ST6GAL1	ST6 beta-galactoside alpha-2,6-sialyltransferase 1
55773	1592.32	1551.29	1609.93	1582.71	1945.28	2035.18	2100.18	1972.56	1798.68	0.341132	0.0642593	5.30868	1.10422e-07	1.42109e-06	ENSG00000036054	TBC1D23	TBC1 domain family member 23
6119	1108.64	691.033	1001.63	1048.13	1640.29	1731.76	1445.2	1521.83	1273.56	0.682886	0.128642	5.30841	1.10587e-07	1.42207e-06	ENSG00000106399	RPA3	replication protein A3
100127983	394.4	382.284	381.43	441.477	566.965	650.673	599.294	526.017	492.818	0.536158	0.101014	5.30776	1.10983e-07	1.42602e-06	ENSG00000253250	C8orf88	chromosome 8 open reading frame 88
10827	484.661	448.747	462.67	459.496	607.044	621.455	669.565	693.733	555.921	0.470651	0.0886821	5.30717	1.11341e-07	1.42947e-06	ENSG00000055147	FAM114A2	family with sequence similarity 114 member A2
3955	2125.05	2294.64	2074.58	2524.23	1540.58	1637.36	1587.07	1761.97	1943.19	-0.453808	0.0855132	-5.30687	1.11522e-07	1.4306e-06	ENSG00000106003	LFNG	LFNG O-fucosylpeptide 3-beta-N-acetylglucosaminyltransferase
54206	1158.67	1247.25	1136.36	1198.29	696.976	804.632	798.175	951.024	998.924	-0.526596	0.0992318	-5.30673	1.11608e-07	1.4306e-06	ENSG00000116285	ERRFI1	ERBB receptor feedback inhibitor 1
2300	456.209	541.608	520.132	584.131	348.977	311.289	359.311	371.643	436.663	-0.569823	0.107423	-5.30449	1.12991e-07	1.44718e-06	ENSG00000176678	FOXL1	forkhead box L1
9361	3904.76	4000.07	4052.07	4051.38	3173.05	3148.85	3133.04	3372.42	3604.46	-0.315364	0.0594686	-5.30303	1.13896e-07	1.4576e-06	ENSG00000196365	LONP1	lon peptidase 1, mitochondrial
9215	20.603	62.6926	22.7867	51.0552	139.786	111.255	128.61	107.681	80.5587	1.24131	0.234117	5.30208	1.14489e-07	1.46402e-06	ENSG00000133424	LARGE1	LARGE xylosyl- and glucuronyltransferase 1
11282	4060.75	3927.01	3896.53	4024.35	3327.5	3192.68	3062.76	3148.48	3580.01	-0.316962	0.0597919	-5.30109	1.15114e-07	1.47084e-06	ENSG00000161013	MGAT4B	alpha-1,3-mannosyl-glycoprotein 4-beta-N-acetylglucosaminyltransferase B
118813	550.395	493.528	598.399	594.642	757.583	763.052	843.255	818.566	677.427	0.499458	0.0942262	5.30063	1.15403e-07	1.47334e-06	ENSG00000155256	ZFYVE27	zinc finger FYVE-type containing 27
8728	2341.87	3785.13	2512.48	2886.12	1764.44	1929.54	1650.71	1437.02	2288.41	-0.717907	0.135474	-5.2992	1.16311e-07	1.48375e-06	ENSG00000135074	ADAM19	ADAM metallopeptidase domain 19
2995	453.266	387.469	426.013	509.05	236.561	268.585	294.344	306.843	360.266	-0.642273	0.121223	-5.2983	1.16888e-07	1.48993e-06	ENSG00000136732	GYPC	glycophorin C (Gerbich blood group)
9562	1176.33	1190.69	1158.16	1282.39	1498.55	1544.08	1610.93	1617.12	1384.78	0.37872	0.0714844	5.29794	1.17117e-07	1.49047e-06	ENSG00000107789	MINPP1	multiple inositol-polyphosphate phosphatase 1
6640	697.559	596.759	596.418	602.151	853.381	828.232	872.424	904.33	743.906	0.461232	0.087058	5.29799	1.17085e-07	1.49047e-06	ENSG00000101400	SNTA1	syntrophin alpha 1
5791	800.574	913.993	726.203	747.808	1182.81	1090.07	1207.87	1093.96	970.411	0.499683	0.0943195	5.29777	1.17226e-07	1.49056e-06	ENSG00000132334	PTPRE	protein tyrosine phosphatase, receptor type E
4149	958.53	910.693	934.256	982.061	684.269	750.69	574.103	632.745	803.418	-0.500632	0.094501	-5.29764	1.17311e-07	1.49056e-06	ENSG00000125952	MAX	MYC associated factor X
4938	45.1304	38.6526	53.4993	57.0616	6.84269	15.733	21.214	11.4352	31.1961	-1.31424	0.248155	-5.29605	1.18332e-07	1.50235e-06	ENSG00000089127	OAS1	2'-5'-oligoadenylate synthetase 1
57180	281.574	229.087	304.153	243.263	449.662	428.163	384.503	399.277	339.96	0.625134	0.118042	5.29588	1.18444e-07	1.50258e-06	ENSG00000133627	ACTR3B	ARP3 actin related protein 3 homolog B
50848	2423.31	2536.46	2318.3	2432.63	1905.2	1903.7	1571.16	1778.17	2108.61	-0.429979	0.0811958	-5.29558	1.18639e-07	1.50385e-06	ENSG00000158769	F11R	F11 receptor
50628	1973.96	1816.2	1859.59	1854.5	1335.3	1482.28	1377.58	1506.58	1650.75	-0.388564	0.073444	-5.29061	1.2191e-07	1.5441e-06	ENSG00000179409	GEMIN4	gem nuclear organelle associated protein 4
8496	1420.63	1684.22	1287.95	1201.3	995.122	952.972	848.558	772.826	1145.45	-0.620982	0.117403	-5.28932	1.22769e-07	1.55375e-06	ENSG00000110841	PPFIBP1	PPFIA binding protein 1
133	518.999	613.257	489.419	759.821	224.831	318.032	273.13	405.948	450.43	-0.86685	0.163959	-5.28701	1.24333e-07	1.57229e-06	ENSG00000148926	ADM	adrenomedullin
23136	2236.9	1993.44	2261.83	1626.26	2803.55	2866.78	3428.7	3372.42	2573.73	0.591889	0.111957	5.28678	1.24491e-07	1.57305e-06	ENSG00000082397	EPB41L3	erythrocyte membrane protein band 4.1 like 3
166929	1419.65	1422.13	1243.36	1120.21	935.493	946.23	904.245	872.883	1108.03	-0.497362	0.0941478	-5.28278	1.2724e-07	1.60652e-06	ENSG00000164023	SGMS2	sphingomyelin synthase 2
4124	1629.6	1810.07	1532.65	1500.12	1156.41	1245.16	1184	1162.57	1402.57	-0.440173	0.0833519	-5.2809	1.28549e-07	1.62048e-06	ENSG00000112893	MAN2A1	mannosidase alpha class 2A member 1
8506	674.994	793.793	783.665	707.264	429.134	501.209	562.17	506.959	619.898	-0.550436	0.104229	-5.28103	1.28457e-07	1.62048e-06	ENSG00000108797	CNTNAP1	contactin associated protein 1
51308	604.355	407.266	510.224	509.05	825.032	738.329	766.354	834.766	649.422	0.616127	0.116688	5.28011	1.29107e-07	1.62612e-06	ENSG00000132563	REEP2	receptor accessory protein 2
196051	364.967	372.385	427.994	432.467	606.066	538.294	559.518	630.839	491.566	0.536115	0.101537	5.27998	1.29199e-07	1.62612e-06	ENSG00000203805	PLPP4	phospholipid phosphatase 4
55857	188.37	205.99	218.951	183.198	308.898	277.576	367.267	328.761	259.876	0.644752	0.122122	5.27955	1.295e-07	1.62862e-06	ENSG00000088970	KIZ	kizuna centrosomal protein
54851	234.482	239.458	271.459	267.289	376.348	367.479	357.985	398.325	314.103	0.554281	0.105041	5.27679	1.31468e-07	1.65078e-06	ENSG00000168876	ANKRD49	ankyrin repeat domain 49
153478	1745.37	2232.9	1869.5	1749.39	1266.87	1327.19	1429.29	1273.11	1611.7	-0.507799	0.0962324	-5.2768	1.31459e-07	1.65078e-06	ENSG00000153404	PLEKHG4B	pleckstrin homology and RhoGEF domain containing G4B
4259	1159.65	903.623	1207.7	1349.96	1715.56	1730.63	1746.17	1784.84	1449.77	0.575509	0.109092	5.27544	1.32438e-07	1.66165e-06	ENSG00000143198	MGST3	microsomal glutathione S-transferase 3
1965	4683.75	4216.43	4453.32	4733.11	3270.8	3475.88	3090.61	3680.21	3950.51	-0.410485	0.0778297	-5.27414	1.33378e-07	1.67213e-06	ENSG00000134001	EIF2S1	eukaryotic translation initiation factor 2 subunit alpha
394	2466.47	2920.63	2471.86	2336.52	1820.15	1868.86	1864.18	1518.02	2158.34	-0.513547	0.0974011	-5.2725	1.34581e-07	1.6859e-06	ENSG00000100852	ARHGAP5	Rho GTPase activating protein 5
5810	1251.88	1085.1	1187.88	1148.74	1594.35	1608.14	1565.85	1460.84	1362.85	0.407589	0.0773437	5.26984	1.36544e-07	1.70915e-06	ENSG00000113456	RAD1	RAD1 checkpoint DNA exonuclease
100287314	172.673	210.704	190.22	172.687	98.7302	119.122	102.092	112.446	147.334	-0.742597	0.140938	-5.26895	1.37206e-07	1.7161e-06	ENSG00000235884	LINC00941	long intergenic non-protein coding RNA 941
4093	211.917	285.652	197.155	228.247	478.988	449.515	339.423	368.784	319.96	0.760004	0.144262	5.26822	1.37751e-07	1.72023e-06	ENSG00000120693	SMAD9	SMAD family member 9
6461	1049.77	1237.83	1141.32	1084.17	694.044	769.795	816.737	872.883	958.318	-0.504145	0.095693	-5.26836	1.37647e-07	1.72023e-06	ENSG00000107338	SHB	SH2 domain containing adaptor protein B
7385	2708.8	2519.96	2735.4	2611.32	3324.57	3298.32	3945.79	3951.8	3137	0.44665	0.0847968	5.2673	1.38446e-07	1.72755e-06	ENSG00000140740	UQCRC2	ubiquinol-cytochrome c reductase core protein 2
10491	6606.7	7174.3	6748.83	6204.7	8250.32	8496.96	8704.35	8766.95	7619.14	0.349987	0.0664472	5.26714	1.38565e-07	1.72769e-06	ENSG00000170275	CRTAP	cartilage associated protein
10610	20.603	26.8683	20.8053	28.5308	91.8875	52.818	51.709	73.3756	45.8247	1.18149	0.224433	5.26431	1.40714e-07	1.75311e-06	ENSG00000070731	ST6GALNAC2	ST6 N-acetylgalactosaminide alpha-2,6-sialyltransferase 2
134359	331.61	284.238	331.894	303.328	431.089	468.62	470.685	451.689	384.144	0.527313	0.100225	5.26128	1.43057e-07	1.78092e-06	ENSG00000152359	POC5	POC5 centriolar protein
10775	1053.7	851.771	1046.21	1085.67	1427.19	1348.55	1463.76	1672.39	1243.65	0.535461	0.101825	5.25862	1.45141e-07	1.80546e-06	ENSG00000105171	POP4	POP4 homolog, ribonuclease P/MRP subunit
23590	434.625	287.538	368.55	319.846	546.437	567.513	546.259	661.333	466.513	0.681358	0.129593	5.25766	1.45897e-07	1.81204e-06	ENSG00000148459	PDSS1	decaprenyl diphosphate synthase subunit 1
11201	337.497	362.486	355.671	300.324	502.449	464.124	530.349	490.759	417.957	0.523753	0.0996167	5.25768	1.45883e-07	1.81204e-06	ENSG00000101751	POLI	DNA polymerase iota
29914	740.727	765.51	803.48	693.749	532.752	572.008	458.752	538.405	638.173	-0.499802	0.095073	-5.25704	1.46393e-07	1.8168e-06	ENSG00000120942	UBIAD1	UbiA prenyltransferase domain containing 1
9945	51.017	64.1068	59.4436	54.0584	15.6404	15.733	26.5174	24.7762	38.9116	-1.17866	0.224219	-5.25675	1.46627e-07	1.81829e-06	ENSG00000131459	GFPT2	glutamine-fructose-6-phosphate transaminase 2
191	7353.31	6694.44	7511.69	7431.53	8835.86	9345.42	10165.5	10749	8510.85	0.42259	0.0804039	5.25584	1.47349e-07	1.82583e-06	ENSG00000101444	AHCY	adenosylhomocysteinase
80013	682.842	641.539	688.555	680.235	947.223	920.382	859.165	876.695	787.08	0.41486	0.0789465	5.25495	1.48064e-07	1.83327e-06	ENSG00000148481	MINDY3	MINDY lysine 48 deubiquitinase 3
84445	1977.89	1984.95	2124.12	2120.29	2717.52	2480.2	2725.99	2624.37	2344.42	0.357713	0.0680851	5.25391	1.48907e-07	1.84228e-06	ENSG00000107816	LZTS2	leucine zipper tumor suppressor 2
79098	45.1304	106.53	71.3323	84.0908	21.5056	26.9709	17.2363	32.3996	50.6495	-1.24653	0.237349	-5.25188	1.50554e-07	1.86121e-06	ENSG00000182795	C1orf116	chromosome 1 open reading frame 116
90768	383.608	359.658	387.374	399.432	257.089	243.862	282.411	252.526	320.745	-0.540363	0.102894	-5.25162	1.50764e-07	1.86237e-06	ENSG00000177822	TENM3-AS1	TENM3 antisense RNA 1
92370	330.629	291.309	310.098	322.849	450.64	418.049	468.033	477.418	383.628	0.520363	0.0991183	5.24992	1.52166e-07	1.87823e-06	ENSG00000155893	PXYLP1	2-phosphoxylose phosphatase 1
10962	532.735	569.89	591.464	627.678	750.74	808.004	804.804	827.143	689.057	0.451049	0.0859254	5.24931	1.52673e-07	1.88305e-06	ENSG00000213190	MLLT11	MLLT11, transcription factor 7 cofactor
23275	1083.13	1093.59	1075.93	1156.25	795.707	848.46	875.075	748.05	959.523	-0.423686	0.0807256	-5.24847	1.53371e-07	1.89019e-06	ENSG00000186866	POFUT2	protein O-fucosyltransferase 2
9638	10.792	41.0095	15.8516	36.0389	3.91011	2.24758	1.32587	1.90586	14.1352	-1.4606	0.278335	-5.24765	1.54053e-07	1.89714e-06	ENSG00000149557	FEZ1	fasciculation and elongation protein zeta 1
64778	2542.02	2914.5	2353.97	2483.68	1906.18	1926.17	1502.21	1470.37	2137.39	-0.573856	0.109373	-5.24679	1.54773e-07	1.90455e-06	ENSG00000075420	FNDC3B	fibronectin type III domain containing 3B
400451	39.2438	49.9656	28.7311	58.5633	2.93258	11.2379	15.9105	10.4822	27.1334	-1.3839	0.263887	-5.24428	1.56898e-07	1.92921e-06	ENSG00000185442	FAM174B	family with sequence similarity 174 member B
10848	1500.09	1942.53	1497.98	1611.24	1222.89	1136.15	971.864	946.259	1353.63	-0.590258	0.112567	-5.24361	1.57466e-07	1.93471e-06	ENSG00000104881	PPP1R13L	protein phosphatase 1 regulatory subunit 13 like
3280	200.143	169.694	178.331	201.217	95.7976	130.359	95.4628	94.34	145.668	-0.778149	0.148416	-5.24304	1.57953e-07	1.9392e-06	ENSG00000114315	HES1	hes family bHLH transcription factor 1
30844	2896.19	3383.99	2930.57	3356.13	2211.16	2167.79	2452.86	2391.85	2723.82	-0.436352	0.0833527	-5.23501	1.64975e-07	2.02385e-06	ENSG00000103966	EHD4	EH domain containing 4
2047	283.537	370.499	320.005	340.868	221.899	205.653	209.488	198.209	268.77	-0.626948	0.11979	-5.23371	1.66139e-07	2.03657e-06	ENSG00000154928	EPHB1	EPH receptor B1
22821	1078.22	1213.31	1088.81	1028.61	745.853	801.261	833.973	836.672	953.34	-0.447899	0.0856128	-5.23168	1.6798e-07	2.05757e-06	ENSG00000185989	RASA3	RAS p21 protein activator 3
9584	6926.53	6025.09	7092.61	6381.89	8308.98	8476.73	9340.77	8956.58	7688.65	0.401051	0.0766759	5.23048	1.69075e-07	2.06939e-06	ENSG00000131051	RBM39	RNA binding motif protein 39
11112	882.005	734.4	805.461	906.98	1112.43	1146.26	1165.44	1169.24	990.278	0.458328	0.0876516	5.22898	1.70452e-07	2.08465e-06	ENSG00000106049	HIBADH	3-hydroxyisobutyrate dehydrogenase
6507	354.175	307.335	333.875	270.292	445.752	448.391	555.54	552.699	408.508	0.625276	0.119608	5.22772	1.71618e-07	2.0973e-06	ENSG00000079215	SLC1A3	solute carrier family 1 member 3
29988	338.478	338.917	335.856	345.373	202.348	231.5	206.836	251.573	281.36	-0.578398	0.110669	-5.22637	1.72874e-07	2.11104e-06	ENSG00000136856	SLC2A8	solute carrier family 2 member 8
8289	2120.15	2887.63	2134.03	1943.1	1508.32	1578.92	1234.39	1114.93	1815.18	-0.697151	0.133405	-5.22585	1.73361e-07	2.11399e-06	ENSG00000117713	ARID1A	AT-rich interaction domain 1A
84552	39.2438	52.3224	35.6662	52.5568	102.64	103.388	88.8334	90.5283	70.6475	0.95903	0.183522	5.22568	1.73512e-07	2.11399e-06	ENSG00000178184	PARD6G	par-6 family cell polarity regulator gamma
256764	10.792	25.4542	14.8609	13.5146	0	2.24758	0	0	8.35866	-1.43297	0.274213	-5.22578	1.73427e-07	2.11399e-06	ENSG00000166415	WDR72	WD repeat domain 72
7358	1497.15	1716.27	1399.9	1467.08	1169.12	1094.57	890.986	917.671	1269.09	-0.557118	0.106683	-5.22217	1.76834e-07	2.15282e-06	ENSG00000109814	UGDH	UDP-glucose 6-dehydrogenase
57460	920.267	1170.89	927.321	974.553	760.516	665.283	615.205	618.451	831.561	-0.565362	0.108292	-5.22069	1.78253e-07	2.16845e-06	ENSG00000111110	PPM1H	protein phosphatase, Mg2+/Mn2+ dependent 1H
84695	870.232	1001.67	1002.62	1046.63	761.493	674.273	698.734	673.721	841.171	-0.467473	0.0895503	-5.22023	1.78702e-07	2.17227e-06	ENSG00000115318	LOXL3	lysyl oxidase like 3
51306	774.084	732.985	848.062	671.225	1033.25	1081.08	1157.49	1009.15	913.416	0.483072	0.0925631	5.21883	1.80053e-07	2.18703e-06	ENSG00000031003	FAM13B	family with sequence similarity 13 member B
158866	62.7901	112.658	106.999	67.573	33.2359	32.5899	27.8433	40.023	60.464	-1.13434	0.217371	-5.21847	1.80409e-07	2.18969e-06	ENSG00000102383	ZDHHC15	zinc finger DHHC-type containing 15
58517	5006.53	4735.42	4762.42	5219.64	3942.36	3902.92	3252.36	3456.28	4284.74	-0.427917	0.082079	-5.21348	1.85335e-07	2.24777e-06	ENSG00000119707	RBM25	RNA binding motif protein 25
90120	1567.79	1409.41	1572.28	1389	1133.93	1151.88	1087.21	1097.77	1301.16	-0.401495	0.0770134	-5.21332	1.85493e-07	2.24798e-06	ENSG00000238227	TMEM250	transmembrane protein 250
10605	3548.62	2714.64	3440.8	3004.75	4322.62	4310.85	4586.19	4795.14	3840.45	0.489215	0.0939197	5.20886	1.90003e-07	2.30089e-06	ENSG00000172239	PAIP1	poly(A) binding protein interacting protein 1
9985	77.5065	84.3758	70.3416	72.0779	38.1235	33.7136	31.8209	32.3996	55.0449	-1.00416	0.192882	-5.20608	1.92871e-07	2.33386e-06	ENSG00000100918	REC8	REC8 meiotic recombination protein
5983	1885.67	1481.05	1795.2	1569.2	2428.18	2228.47	2334.86	2412.82	2016.93	0.470363	0.0903902	5.2037	1.95363e-07	2.36223e-06	ENSG00000133119	RFC3	replication factor C subunit 3
657	1017.4	1132.24	978.838	985.064	1462.38	1524.98	1352.39	1317.9	1221.4	0.445308	0.0856048	5.20191	1.97252e-07	2.38326e-06	ENSG00000107779	BMPR1A	bone morphogenetic protein receptor type 1A
47	14206.3	15563.3	14689.5	13769.9	11488.9	11970.6	11555	11102.6	13043.2	-0.33239	0.0639142	-5.20056	1.98689e-07	2.39881e-06	ENSG00000131473	ACLY	ATP citrate lyase
153527	1939.63	1771.42	2002.26	1925.08	2451.64	2461.1	2377.29	2633.9	2195.29	0.373295	0.0718123	5.19821	2.01217e-07	2.4275e-06	ENSG00000146007	ZMAT2	zinc finger matrin-type 2
4919	882.986	980.928	765.832	729.788	585.538	556.275	530.349	583.193	701.861	-0.557169	0.1072	-5.19746	2.0203e-07	2.43548e-06	ENSG00000185483	ROR1	receptor tyrosine kinase like orphan receptor 1
3309	19122.5	20351.5	18340.3	21354.6	13375.5	14387.9	14787.4	16232.2	17244	-0.420198	0.0808753	-5.19562	2.04035e-07	2.4578e-06	ENSG00000044574	HSPA5	heat shock protein family A (Hsp70) member 5
8943	3788.01	4071.25	3487.36	3785.59	3012.74	2970.17	2613.29	2753.01	3310.18	-0.406876	0.0783333	-5.19416	2.05649e-07	2.47362e-06	ENSG00000065000	AP3D1	adaptor related protein complex 3 subunit delta 1
11007	2195.69	1713.44	2160.78	2606.82	3814.31	3299.44	3138.34	3166.58	2761.92	0.602911	0.116075	5.19415	2.05659e-07	2.47362e-06	ENSG00000175602	CCDC85B	coiled-coil domain containing 85B
23499	4379.61	6354.58	4977.41	4384.74	3167.19	3179.2	3562.62	2584.34	4073.71	-0.650312	0.125262	-5.19162	2.08475e-07	2.50562e-06	ENSG00000127603	MACF1	microtubule-actin crosslinking factor 1
120	2006.34	2256.46	2069.63	1925.08	2709.7	2612.81	3255.02	2932.16	2470.9	0.464189	0.0894138	5.19147	2.0864e-07	2.50571e-06	ENSG00000148700	ADD3	adducin 3
2583	45.1304	88.6182	65.388	66.0714	140.764	120.245	182.97	149.61	107.35	0.985448	0.189923	5.18866	2.11807e-07	2.54185e-06	ENSG00000135454	B4GALNT1	beta-1,4-N-acetyl-galactosaminyltransferase 1
25793	2090.71	2048.12	1898.23	2061.73	2549.39	2551	3099.89	3094.16	2424.15	0.466759	0.0899638	5.18829	2.12232e-07	2.54503e-06	ENSG00000100225	FBXO7	F-box protein 7
8821	467.983	630.226	544.9	435.47	274.685	323.651	364.615	299.22	417.594	-0.686475	0.132392	-5.18519	2.15799e-07	2.58587e-06	ENSG00000109452	INPP4B	inositol polyphosphate-4-phosphatase type II B
57142	11908.5	13812.7	12370.2	14170.8	9989.34	10316.4	8957.59	9593.14	11389.8	-0.418273	0.0807537	-5.17961	2.22349e-07	2.66237e-06	ENSG00000115310	RTN4	reticulon 4
3814	54.9413	56.0934	70.3416	67.573	17.5955	23.5995	23.8657	29.5408	42.9439	-1.12256	0.216807	-5.17768	2.24664e-07	2.68807e-06	ENSG00000170498	KISS1	KiSS-1 metastasis suppressor
100093631	213.879	208.347	234.802	184.7	313.786	319.156	307.602	352.584	266.857	0.588818	0.11383	5.17279	2.30629e-07	2.75738e-06	ENSG00000233369	GTF2IP4	general transcription factor IIi pseudogene 4
55734	872.194	947.46	949.117	900.973	670.583	686.634	702.712	709.933	804.951	-0.399914	0.0773527	-5.17001	2.34081e-07	2.79656e-06	ENSG00000020256	ZFP64	ZFP64 zinc finger protein
26229	1038	886.182	1002.62	971.55	1274.69	1385.63	1239.69	1385.56	1147.99	0.432121	0.0835924	5.16938	2.3487e-07	2.8039e-06	ENSG00000149541	B3GAT3	beta-1,3-glucuronyltransferase 3
10170	6.86767	3.77099	5.94436	6.00649	27.3707	19.1044	37.1244	25.7291	16.4898	1.39552	0.270081	5.16704	2.37833e-07	2.83714e-06	ENSG00000073737	DHRS9	dehydrogenase/reductase 9
79866	672.05	621.27	753.943	627.678	888.572	910.268	949.324	1026.31	806.176	0.483213	0.0935263	5.1666	2.38394e-07	2.84172e-06	ENSG00000136122	BORA	bora, aurora kinase A activator
200081	2164.3	2367.24	2135.02	1979.14	1569.91	1569.93	1058.05	1077.76	1740.17	-0.671725	0.130023	-5.16621	2.38883e-07	2.84543e-06	ENSG00000084652	TXLNA	taxilin alpha
26985	1756.16	1846.84	1749.62	1627.76	2209.21	2243.08	2725.99	2815.91	2121.82	0.500098	0.0968479	5.16375	2.42054e-07	2.88093e-06	ENSG00000185009	AP3M1	adaptor related protein complex 3 subunit mu 1
2635	639.674	724.501	616.232	690.746	379.28	398.945	453.448	518.394	552.653	-0.5846	0.113215	-5.16362	2.42223e-07	2.88093e-06	ENSG00000117226	GBP3	guanylate binding protein 3
164091	445.417	464.774	502.299	509.05	307.921	360.736	286.388	338.29	401.859	-0.544766	0.10551	-5.16315	2.42823e-07	2.88591e-06	ENSG00000182749	PAQR7	progestin and adipoQ receptor family member 7
51124	2461.57	1901.99	2300.47	2335.02	3142.75	3098.28	3056.13	3064.62	2670.1	0.448691	0.0869323	5.16138	2.45133e-07	2.9112e-06	ENSG00000134049	IER3IP1	immediate early response 3 interacting protein 1
84911	25.5085	16.9694	29.7218	15.0162	2.93258	2.24758	2.65174	3.81172	12.3574	-1.43236	0.277525	-5.16119	2.4538e-07	2.91198e-06	ENSG00000161298	ZNF382	zinc finger protein 382
22887	1255.8	1448.53	1149.24	1123.21	903.234	866.441	871.098	872.883	1061.31	-0.49117	0.0952025	-5.15921	2.47989e-07	2.94076e-06	ENSG00000198815	FOXJ3	forkhead box J3
9538	4137.28	3794.08	4198.7	4025.85	4977.56	5108.74	5124.49	5683.27	4631.25	0.365619	0.0708786	5.15839	2.49086e-07	2.95158e-06	ENSG00000149547	EI24	EI24, autophagy associated transmembrane protein
9712	592.582	684.434	636.047	552.597	819.167	843.965	959.931	912.906	750.204	0.496749	0.0963232	5.1571	2.50799e-07	2.96968e-06	ENSG00000148429	USP6NL	USP6 N-terminal like
54532	587.676	745.241	641.991	572.118	375.37	379.84	487.921	397.372	523.441	-0.612599	0.118802	-5.15647	2.51642e-07	2.97746e-06	ENSG00000145390	USP53	ubiquitin specific peptidase 53
51322	3216.03	3218.07	3108.9	2814.04	4047.94	3869.2	5132.45	4761.79	3771.05	0.509313	0.0987867	5.15568	2.52708e-07	2.98786e-06	ENSG00000095787	WAC	WW domain containing adaptor with coiled-coil
1349	1511.87	1140.25	1574.27	1877.03	2047.92	2744.29	2586.78	2809.24	2036.45	0.695528	0.134964	5.15342	2.55772e-07	3.02185e-06	ENSG00000131174	COX7B	cytochrome c oxidase subunit 7B
116151	668.126	598.173	713.323	627.678	860.223	864.193	1085.89	1076.81	811.802	0.55431	0.107603	5.15145	2.58484e-07	3.05163e-06	ENSG00000124098	FAM210B	family with sequence similarity 210 member B
23094	1577.6	2208.86	1492.03	1348.46	1111.45	1036.13	831.322	736.615	1292.81	-0.771203	0.149822	-5.14747	2.6402e-07	3.11469e-06	ENSG00000105738	SIPA1L3	signal induced proliferation associated 1 like 3
64940	369.873	277.639	304.153	274.797	421.314	468.62	535.652	568.899	402.618	0.661542	0.128599	5.14423	2.68626e-07	3.1667e-06	ENSG00000106610	STAG3L4	stromal antigen 3-like 4 (pseudogene)
60313	1650.2	1683.75	1563.37	1531.65	1213.11	1285.61	1206.54	1271.21	1425.68	-0.365238	0.0710504	-5.14055	2.73938e-07	3.22694e-06	ENSG00000159592	GPBP1L1	GC-rich promoter binding protein 1 like 1
55110	999.736	685.377	916.423	903.977	1277.63	1272.13	1397.47	1330.29	1097.88	0.569558	0.110807	5.14011	2.74574e-07	3.23205e-06	ENSG00000111196	MAGOHB	mago homolog B, exon junction complex subunit
143686	77.5065	99.4598	55.4807	58.5633	19.5505	32.5899	27.8433	27.635	49.8286	-1.15799	0.225404	-5.13739	2.78577e-07	3.27676e-06	ENSG00000149212	SESN3	sestrin 3
8796	34.3383	49.0228	21.796	58.5633	9.77527	4.49515	6.62936	13.341	24.7452	-1.37634	0.268137	-5.13299	2.85179e-07	3.35196e-06	ENSG00000136155	SCEL	sciellin
9235	6542.93	5325.1	7059.92	7469.07	4563.09	4360.3	4305.11	4889.48	5564.37	-0.523091	0.101965	-5.13012	2.8955e-07	3.40083e-06	ENSG00000008517	IL32	interleukin 32
2944	239.387	239.458	203.099	202.719	151.517	122.493	133.913	128.645	177.654	-0.683457	0.13324	-5.12951	2.90497e-07	3.40945e-06	ENSG00000134184	GSTM1	glutathione S-transferase mu 1
3316	92.223	82.0189	82.2303	103.612	41.0561	43.8277	42.4279	43.8348	66.4038	-0.930007	0.181487	-5.12437	2.98531e-07	3.50117e-06	ENSG00000170276	HSPB2	heat shock protein family B (small) member 2
1871	1006.6	1087.93	1041.25	1006.09	755.628	849.584	735.859	727.085	901.254	-0.425383	0.0830648	-5.1211	3.0376e-07	3.55728e-06	ENSG00000112242	E2F3	E2F transcription factor 3
10985	4133.35	5275.14	4412.7	4177.51	3213.13	3441.04	3200.65	2897.86	3843.92	-0.483635	0.0944388	-5.12115	3.03684e-07	3.55728e-06	ENSG00000089154	GCN1	GCN1, eIF2 alpha kinase activator homolog
6230	14151.3	8896.23	15459.3	15226.5	20870.2	21944.2	23167	23820.4	17941.9	0.694319	0.135624	5.11944	3.06439e-07	3.58603e-06	ENSG00000118181	RPS25	ribosomal protein S25
285381	910.457	833.859	865.895	961.038	1205.29	1132.78	1165.44	1279.78	1044.32	0.417398	0.0815775	5.11658	3.11127e-07	3.63823e-06	ENSG00000154813	DPH3	diphthamide biosynthesis 3
9791	2265.35	2468.11	2285.61	2407.1	1742.93	1901.45	1694.46	1900.14	2083.14	-0.374061	0.0731148	-5.11609	3.11941e-07	3.64509e-06	ENSG00000156471	PTDSS1	phosphatidylserine synthase 1
843	163.843	166.395	151.581	141.152	90.91	75.2938	62.316	101.963	119.182	-0.8248	0.161314	-5.11301	3.17072e-07	3.70234e-06	ENSG00000003400	CASP10	caspase 10
222166	258.028	235.215	217.96	240.26	335.292	379.84	344.727	349.725	295.131	0.546164	0.106859	5.11106	3.20364e-07	3.73804e-06	ENSG00000180354	MTURN	maturin, neural progenitor differentiation regulator homolog
60489	66.7145	80.1335	70.3416	81.0876	16.618	39.3326	34.4727	27.635	52.0419	-1.10173	0.215605	-5.10994	3.22269e-07	3.75753e-06	ENSG00000239713	APOBEC3G	apolipoprotein B mRNA editing enzyme catalytic subunit 3G
2710	192.295	189.492	219.941	178.693	283.483	313.537	290.366	303.032	246.355	0.580517	0.113686	5.10632	3.28485e-07	3.82722e-06	ENSG00000198814	GK	glycerol kinase
1488	1438.29	1481.05	1415.75	1416.03	1741.95	1832.9	1841.64	1946.84	1639.31	0.349855	0.0685527	5.10345	3.3352e-07	3.88024e-06	ENSG00000175029	CTBP2	C-terminal binding protein 2
79947	845.704	933.319	861.933	860.43	671.561	661.911	660.284	649.898	768.13	-0.400318	0.0784393	-5.10354	3.33363e-07	3.88024e-06	ENSG00000117682	DHDDS	dehydrodolichyl diphosphate synthase subunit
3949	1210.67	2125.89	1261.2	1672.81	927.673	855.203	940.043	890.036	1235.44	-0.738899	0.144841	-5.10144	3.37077e-07	3.91877e-06	ENSG00000130164	LDLR	low density lipoprotein receptor
84216	219.765	167.809	183.285	192.208	290.325	280.947	322.187	299.22	244.468	0.618854	0.12135	5.09976	3.40092e-07	3.95095e-06	ENSG00000139173	TMEM117	transmembrane protein 117
55081	938.908	738.171	927.321	888.96	1161.3	1239.54	1221.13	1344.58	1057.49	0.495672	0.0972623	5.09624	3.46463e-07	4.02204e-06	ENSG00000114446	IFT57	intraflagellar transport 57
4232	163.843	144.712	149.6	160.674	231.674	220.262	267.826	259.197	199.723	0.632643	0.124158	5.09547	3.4787e-07	4.03545e-06	ENSG00000106484	MEST	mesoderm specific transcript
8761	4815.22	4448.35	4711.9	4649.02	3635.42	3532.07	2576.17	3019.83	3923.5	-0.525171	0.103089	-5.09432	3.49994e-07	4.05714e-06	ENSG00000090621	PABPC4	poly(A) binding protein cytoplasmic 4
340252	267.839	199.391	230.839	195.211	331.381	325.899	430.908	403.089	298.07	0.691086	0.135741	5.09122	3.55762e-07	4.12102e-06	ENSG00000173041	ZNF680	zinc finger protein 680
3454	1875.85	1970.34	1816	1773.42	1294.25	1454.18	1296.7	1508.49	1623.65	-0.412843	0.0810924	-5.09102	3.56136e-07	4.12236e-06	ENSG00000142166	IFNAR1	interferon alpha and beta receptor subunit 1
9620	778.99	1125.17	848.062	815.381	612.909	569.761	548.911	572.711	733.987	-0.604663	0.118778	-5.09071	3.56725e-07	4.12619e-06	ENSG00000075275	CELSR1	cadherin EGF LAG seven-pass G-type receptor 1
79971	1461.83	1429.2	1528.69	1599.23	1139.8	1070.97	1225.11	1019.63	1309.31	-0.423367	0.0831896	-5.08918	3.59609e-07	4.15655e-06	ENSG00000116729	WLS	wntless Wnt ligand secretion mediator
10488	1451.04	1432.97	1501.94	1603.73	1155.44	1003.54	1103.13	1188.3	1305.01	-0.416113	0.0818099	-5.08634	3.65048e-07	4.21637e-06	ENSG00000107175	CREB3	cAMP responsive element binding protein 3
51534	2414.48	2072.63	2322.26	2216.39	2801.59	2881.39	3285.51	3220.9	2651.89	0.424025	0.0833844	5.08519	3.67266e-07	4.23893e-06	ENSG00000009844	VTA1	vesicle trafficking 1
29959	2799.07	2915.44	2863.2	3090.34	3556.24	3671.42	4189.76	4308.19	3424.21	0.421193	0.0828414	5.08433	3.68923e-07	4.25499e-06	ENSG00000115216	NRBP1	nuclear receptor binding protein 1
343578	195.238	184.307	214.988	195.211	102.64	129.236	127.284	116.257	158.145	-0.687421	0.135256	-5.08236	3.72782e-07	4.29639e-06	ENSG00000124143	ARHGAP40	Rho GTPase activating protein 40
3915	10040.5	14281.2	10808.8	10526.4	7408.67	7277.65	8570.44	7104.09	9502.22	-0.564721	0.111119	-5.08215	3.7319e-07	4.298e-06	ENSG00000135862	LAMC1	laminin subunit gamma 1
79685	551.376	504.369	517.16	470.008	735.1	683.263	714.645	672.768	606.086	0.443475	0.0872694	5.08168	3.74104e-07	4.30542e-06	ENSG00000164576	SAP30L	SAP30 like
57060	1086.07	1101.13	1123.48	1226.83	1444.78	1424.96	1675.9	1711.46	1349.33	0.453241	0.0892016	5.08109	3.75278e-07	4.31583e-06	ENSG00000090097	PCBP4	poly(rC) binding protein 4
84248	3258.22	3206.28	3012.8	2899.63	3757.61	3915.28	4277.26	4268.17	3574.41	0.381521	0.0750889	5.08093	3.75599e-07	4.31642e-06	ENSG00000122068	FYTTD1	forty-two-three domain containing 1
130814	266.858	248.414	205.08	205.722	331.381	355.117	397.762	376.407	298.343	0.614723	0.12099	5.08079	3.75874e-07	4.31648e-06	ENSG00000162976	PQLC3	PQ loop repeat containing 3
5331	1097.85	1257.15	1100.7	1187.78	858.268	819.241	849.884	918.624	1011.19	-0.421293	0.0829417	-5.07939	3.78658e-07	4.34533e-06	ENSG00000149782	PLCB3	phospholipase C beta 3
8318	1007.58	848.943	922.367	896.469	1140.77	1264.26	1482.32	1517.06	1134.97	0.535954	0.105532	5.0786	3.80219e-07	4.36012e-06	ENSG00000093009	CDC45	cell division cycle 45
199731	237.425	167.809	241.737	168.182	355.82	357.365	300.973	383.078	276.548	0.725718	0.142934	5.07729	3.82847e-07	4.38711e-06	ENSG00000105767	CADM4	cell adhesion molecule 4
50640	609.26	638.711	665.769	705.762	869.999	979.943	877.727	850.966	774.767	0.441857	0.0870406	5.07645	3.84549e-07	4.40345e-06	ENSG00000135241	PNPLA8	patatin like phospholipase domain containing 8
57552	6675.37	7870.99	6529.88	6740.78	4974.63	4901.96	5263.71	5570.83	6066.02	-0.416696	0.082127	-5.0738	3.89953e-07	4.46214e-06	ENSG00000144959	NCEH1	neutral cholesterol ester hydrolase 1
55466	21.5841	22.1545	16.8424	18.0195	2.93258	0	1.32587	4.76465	10.9529	-1.4123	0.278393	-5.07304	3.91515e-07	4.47682e-06	ENSG00000140403	DNAJA4	DnaJ heat shock protein family (Hsp40) member A4
9762	707.37	762.211	763.851	698.254	946.246	963.086	1032.85	957.694	853.946	0.398822	0.0786691	5.06962	3.98613e-07	4.55472e-06	ENSG00000088899	LZTS3	leucine zipper tumor suppressor family member 3
10892	2218.26	2229.6	2185.54	2121.79	1426.21	1476.66	1758.11	1742.91	1894.88	-0.441007	0.0870098	-5.06848	4.01006e-07	4.5788e-06	ENSG00000172175	MALT1	MALT1 paracaspase
2876	5108.56	4251.32	5352.9	5715.17	6996.16	6860.73	7098.72	7874.06	6157.2	0.483144	0.0953741	5.06577	4.06743e-07	4.64099e-06	ENSG00000233276	GPX1	glutathione peroxidase 1
23169	396.363	492.114	428.985	433.969	294.235	325.899	259.871	234.421	358.232	-0.622891	0.122967	-5.06552	4.07296e-07	4.64399e-06	ENSG00000116704	SLC35D1	solute carrier family 35 member D1
57509	302.177	272.454	367.56	210.227	436.954	494.467	499.854	519.347	387.88	0.703285	0.13888	5.06399	4.10564e-07	4.67792e-06	ENSG00000129422	MTUS1	microtubule associated scaffold protein 1
8467	4611.15	4891.91	4407.74	4377.23	3499.54	3793.91	3476.44	3596.36	4081.78	-0.343905	0.0679204	-5.06334	4.11968e-07	4.69057e-06	ENSG00000153147	SMARCA5	SWI/SNF related, matrix associated, actin dependent regulator of chromatin, subfamily a, member 5
1902	327.686	379.455	378.458	313.839	225.809	244.986	238.657	222.986	291.484	-0.570036	0.112631	-5.06111	4.16823e-07	4.74247e-06	ENSG00000198121	LPAR1	lysophosphatidic acid receptor 1
9069	1275.42	1316.07	1166.09	1142.73	888.572	927.125	969.212	880.507	1070.72	-0.414137	0.0818389	-5.06039	4.18392e-07	4.75695e-06	ENSG00000157224	CLDN12	claudin 12
9414	2243.77	2599.62	2183.56	2145.82	1688.19	1667.7	1752.8	1753.39	2004.36	-0.41205	0.0815004	-5.05581	4.28562e-07	4.86911e-06	ENSG00000119139	TJP2	tight junction protein 2
51646	1138.07	1128.94	1103.67	1307.91	1593.37	1542.96	1484.98	1559.95	1357.48	0.397813	0.0786895	5.05548	4.29307e-07	4.87188e-06	ENSG00000119801	YPEL5	yippee like 5
348	25.5085	23.0973	29.7218	36.0389	1.95505	8.9903	2.65174	7.62344	16.9484	-1.37823	0.272624	-5.05543	4.29415e-07	4.87188e-06	ENSG00000130203	APOE	apolipoprotein E
221184	936.946	956.888	862.923	923.498	1181.83	1158.63	1256.93	1213.08	1061.34	0.377319	0.0746633	5.05361	4.33538e-07	4.91518e-06	ENSG00000140848	CPNE2	copine 2
25828	1676.69	1506.04	1704.05	1701.34	2071.38	2122.84	2116.09	2321.34	1902.47	0.384952	0.0761801	5.05318	4.34513e-07	4.92274e-06	ENSG00000100348	TXN2	thioredoxin 2
86	3093.39	2629.32	3106.92	3060.31	3824.08	3784.92	3968.33	3958.47	3428.22	0.380206	0.0753088	5.04863	4.44999e-07	5.03797e-06	ENSG00000136518	ACTL6A	actin like 6A
29943	183.465	236.629	245.7	244.764	123.168	119.122	163.082	115.304	178.904	-0.750219	0.148625	-5.04772	4.47125e-07	5.05845e-06	ENSG00000142623	PADI1	peptidyl arginine deiminase 1
53346	102.034	76.8338	64.3973	93.1006	46.9213	23.5995	15.9105	31.4467	56.7804	-1.1587	0.229568	-5.0473	4.48093e-07	5.06583e-06	ENSG00000136404	TM6SF1	transmembrane 6 superfamily member 1
10745	739.746	715.073	803.48	713.271	950.156	959.715	1100.47	1032.98	876.861	0.432625	0.0857496	5.04521	4.5302e-07	5.11791e-06	ENSG00000116793	PHTF1	putative homeodomain transcription factor 1
54503	661.258	714.602	726.203	758.319	935.493	917.011	1011.64	950.071	834.325	0.407503	0.0807764	5.04482	4.53946e-07	5.12476e-06	ENSG00000177054	ZDHHC13	zinc finger DHHC-type containing 13
56704	103.015	87.2041	97.0913	85.5925	44.9662	56.1894	33.1468	40.976	68.5226	-0.942409	0.186852	-5.04361	4.56834e-07	5.15371e-06	ENSG00000104369	JPH1	junctophilin 1
359845	4962.38	4808.01	4568.24	4368.22	3607.07	3692.77	2829.41	3283.8	4014.99	-0.466278	0.0924672	-5.04263	4.59168e-07	5.1764e-06	ENSG00000183688	RFLNB	refilin B
55717	1981.81	1922.26	1836.81	1791.44	2335.31	2359.95	2527.11	2376.61	2141.41	0.342534	0.0679494	5.04102	4.63054e-07	5.21343e-06	ENSG00000120008	WDR11	WD repeat domain 11
157922	1469.68	1884.55	1474.2	1542.17	1110.47	1044	1227.76	1024.4	1347.15	-0.516398	0.10244	-5.041	4.63104e-07	5.21343e-06	ENSG00000130559	CAMSAP1	calmodulin regulated spectrin associated protein 1
64770	1892.53	1666.78	1849.69	1719.36	2369.52	2271.18	2700.8	2276.55	2093.3	0.421904	0.0837198	5.03947	4.66823e-07	5.2501e-06	ENSG00000175455	CCDC14	coiled-coil domain containing 14
5420	86.3364	119.729	79.2582	120.13	24.4382	56.1894	45.0796	21.9174	69.1347	-1.15338	0.228873	-5.03939	4.67018e-07	5.2501e-06	ENSG00000128567	PODXL	podocalyxin like
1666	972.266	749.012	888.682	1037.62	1382.22	1358.66	1270.19	1269.3	1115.99	0.520448	0.103301	5.03819	4.69954e-07	5.27939e-06	ENSG00000104325	DECR1	2,4-dienoyl-CoA reductase 1
79660	454.247	627.398	527.067	513.555	387.1	314.661	335.446	335.431	436.863	-0.602148	0.119537	-5.03733	4.72074e-07	5.29948e-06	ENSG00000173281	PPP1R3B	protein phosphatase 1 regulatory subunit 3B
10194	165.805	195.62	145.637	183.198	294.235	292.185	270.478	253.479	225.08	0.641999	0.12747	5.03646	4.74226e-07	5.31619e-06	ENSG00000179981	TSHZ1	teashirt zinc finger homeobox 1
9980	1410.82	2214.04	1538.6	1746.39	1090.92	1202.45	1046.11	1008.2	1407.19	-0.634063	0.125894	-5.03649	4.74158e-07	5.31619e-06	ENSG00000142197	DOP1B	DOP1 leucine zipper like protein B
55299	2037.74	1734.18	2033.96	2037.7	2467.28	2593.7	2619.92	2842.59	2295.88	0.41667	0.0827366	5.0361	4.75106e-07	5.32232e-06	ENSG00000113460	BRIX1	BRX1, biogenesis of ribosomes
55835	525.867	665.108	540.937	536.079	782.999	765.3	1030.2	965.318	726.476	0.606696	0.120583	5.03137	4.86985e-07	5.45158e-06	ENSG00000151849	CENPJ	centromere protein J
10539	2848.12	1983.07	2557.07	2865.1	3742.95	3810.77	3640.84	3984.2	3179.01	0.545641	0.108513	5.02834	4.94741e-07	5.53401e-06	ENSG00000108010	GLRX3	glutaredoxin 3
55610	573.941	522.753	540.937	468.506	702.842	701.244	759.725	761.391	628.917	0.456999	0.0908867	5.02823	4.95041e-07	5.53401e-06	ENSG00000004766	VPS50	VPS50, EARP/GARPII complex subunit
2700	2.94329	12.7271	5.94436	3.00324	28.3483	56.1894	27.8433	33.3525	21.2939	1.38009	0.274501	5.02764	4.96547e-07	5.54697e-06	ENSG00000121743	GJA3	gap junction protein alpha 3
5880	1012.49	1247.25	1140.33	1303.41	850.448	838.346	776.961	870.978	1005.03	-0.478623	0.0952101	-5.02702	4.98172e-07	5.56124e-06	ENSG00000128340	RAC2	Rac family small GTPase 2
10778	684.805	599.115	705.398	659.212	910.077	904.649	841.929	979.612	785.6	0.449816	0.0894916	5.02635	4.99893e-07	5.57656e-06	ENSG00000257267	ZNF271P	zinc finger protein 271, pseudogene
3633	421.871	461.474	419.078	448.985	317.696	314.661	291.692	313.514	373.621	-0.485401	0.096574	-5.02621	5.00274e-07	5.57692e-06	ENSG00000204084	INPP5B	inositol polyphosphate-5-phosphatase B
26146	619.071	720.73	632.084	533.076	430.112	451.763	428.257	396.419	526.439	-0.540357	0.107599	-5.02197	5.1143e-07	5.69731e-06	ENSG00000204104	TRAF3IP1	TRAF3 interacting protein 1
4299	633.788	795.207	686.574	587.134	466.28	445.02	340.749	265.867	527.577	-0.766982	0.152838	-5.01828	5.21368e-07	5.80398e-06	ENSG00000172493	AFF1	AF4/FMR2 family member 1
93594	373.797	391.711	405.207	334.862	519.067	495.591	625.812	631.792	472.23	0.563031	0.11229	5.01407	5.32907e-07	5.92831e-06	ENSG00000156787	TBC1D31	TBC1 domain family member 31
83939	3096.34	2822.58	3071.25	2845.57	3652.04	3632.08	4169.87	4144.29	3429.25	0.390217	0.0778286	5.01379	5.33679e-07	5.93278e-06	ENSG00000144895	EIF2A	eukaryotic translation initiation factor 2A
6242	677.937	724.501	599.39	627.678	417.404	447.268	493.224	484.088	558.936	-0.50189	0.100138	-5.01197	5.38769e-07	5.9852e-06	ENSG00000114993	RTKN	rhotekin
11057	3422.06	3951.99	3544.82	3004.75	2586.54	2565.61	2531.09	2153.62	2970.06	-0.487213	0.0973159	-5.00651	5.54256e-07	6.15297e-06	ENSG00000140526	ABHD2	abhydrolase domain containing 2
25911	467.001	285.181	501.308	543.587	860.223	783.28	749.118	776.638	620.792	0.760593	0.152047	5.00235	5.66367e-07	6.28306e-06	ENSG00000166171	DPCD	deleted in primary ciliary dyskinesia homolog (mouse)
6767	7372.93	6646.83	7006.42	7396.99	8758.64	8800.38	8757.38	9500.71	8030.04	0.329581	0.0659161	5.00001	5.73273e-07	6.35526e-06	ENSG00000100380	ST13	ST13, Hsp70 interacting protein
51765	990.906	965.372	807.443	899.472	1226.8	1219.31	1223.78	1315.04	1081.02	0.431944	0.0863947	4.99967	5.74296e-07	6.3622e-06	ENSG00000134602	STK26	serine/threonine kinase 26
114822	155.013	176.765	164.461	147.159	104.595	87.6555	92.811	93.3871	127.731	-0.718166	0.143655	-4.99926	5.7552e-07	6.37135e-06	ENSG00000158106	RHPN1	rhophilin Rho GTPase binding protein 1
9875	973.247	1411.29	1140.33	1117.21	782.021	833.851	753.095	655.616	958.332	-0.591915	0.118429	-4.99807	5.79064e-07	6.40614e-06	ENSG00000142207	URB1	URB1 ribosome biogenesis homolog
9420	11.7731	18.8549	12.8795	21.0227	2.93258	1.12379	0	0	8.57333	-1.38153	0.276432	-4.99772	5.80116e-07	6.41335e-06	ENSG00000172817	CYP7B1	cytochrome P450 family 7 subfamily B member 1
5599	1425.53	1350.96	1468.26	1407.02	1724.36	1884.59	2024.61	1784.84	1633.77	0.384551	0.0769532	4.99721	5.81656e-07	6.42593e-06	ENSG00000107643	MAPK8	mitogen-activated protein kinase 8
80115	144.221	151.311	175.359	168.182	69.4044	95.522	66.2936	104.822	121.889	-0.826481	0.165402	-4.9968	5.82903e-07	6.43135e-06	ENSG00000128298	BAIAP2L2	BAI1 associated protein 2 like 2
114299	30.414	53.2652	32.694	28.5308	9.77527	8.9903	10.607	9.5293	22.9757	-1.29633	0.259434	-4.99678	5.82951e-07	6.43135e-06	ENSG00000243444	PALM2	paralemmin 2
29781	1367.65	1357.08	1365.22	1461.08	1717.51	1718.27	1866.83	1762.92	1577.07	0.343987	0.0688512	4.99609	5.85054e-07	6.45011e-06	ENSG00000025770	NCAPH2	non-SMC condensin II complex subunit H2
54520	1123.35	1343.89	1284.97	1090.18	846.538	867.564	938.717	776.638	1033.98	-0.486779	0.0974356	-4.99591	5.85604e-07	6.45173e-06	ENSG00000125633	CCDC93	coiled-coil domain containing 93
4499	5.88657	24.9828	7.92582	42.0454	0	0	0	0	10.1051	-1.31958	0.264179	-4.99503	5.88264e-07	6.47657e-06	ENSG00000205364	MT1M	metallothionein 1M
6001	445.417	387.469	490.41	567.613	747.808	632.693	743.814	823.331	604.819	0.616451	0.123435	4.99412	5.91034e-07	6.5026e-06	ENSG00000148908	RGS10	regulator of G protein signaling 10
728855	216.822	175.822	256.598	246.266	133.921	139.35	114.025	117.21	175.002	-0.749985	0.150217	-4.99266	5.95519e-07	6.54743e-06	NA	LINC00623	long intergenic non-protein coding RNA 623
79134	1460.85	1604.08	1413.77	1471.59	1126.11	1176.61	978.493	1133.99	1295.69	-0.420695	0.0843341	-4.98844	6.08689e-07	6.68763e-06	ENSG00000226479	TMEM185B	transmembrane protein 185B
79627	7735.94	8198.59	6724.06	6321.83	5368.58	5235.73	4986.6	5443.13	6251.81	-0.450493	0.0903172	-4.9879	6.10397e-07	6.7018e-06	ENSG00000119900	OGFRL1	opioid growth factor receptor like 1
84343	674.013	671.707	704.407	717.775	934.515	842.841	946.673	943.4	804.416	0.40012	0.080225	4.98747	6.11741e-07	6.71195e-06	ENSG00000163755	HPS3	HPS3, biogenesis of lysosomal organelles complex 2 subunit 1
3707	59.8468	61.2785	61.4251	67.573	23.4606	35.9612	21.214	16.1998	43.3699	-1.09988	0.220554	-4.98691	6.13523e-07	6.72689e-06	ENSG00000143772	ITPKB	inositol-trisphosphate 3-kinase B
9578	2856.95	3687.55	3048.47	2883.11	2376.37	2121.71	2288.45	2024.02	2660.83	-0.487578	0.0978127	-4.98481	6.20229e-07	6.79576e-06	ENSG00000198752	CDC42BPB	CDC42 binding protein kinase beta
22999	101.053	126.328	96.1005	103.612	45.9437	22.4758	58.3384	54.317	76.021	-1.03682	0.208044	-4.98365	6.23973e-07	6.8321e-06	ENSG00000079841	RIMS1	regulating synaptic membrane exocytosis 1
6147	19173.5	15728.8	21180.8	21273.5	27077.5	27494.6	26139.6	27743.6	23226.5	0.473196	0.0949767	4.98224	6.28536e-07	6.87735e-06	ENSG00000198242	RPL23A	ribosomal protein L23a
51021	2547.9	2377.61	2555.09	2443.14	3432.1	3407.33	2897.03	3229.48	2861.21	0.379332	0.0761447	4.98173	6.30179e-07	6.88643e-06	ENSG00000182180	MRPS16	mitochondrial ribosomal protein S16
3552	22.5652	26.3969	32.694	21.0227	1.95505	3.37136	7.95523	6.67051	15.3289	-1.36177	0.273354	-4.98172	6.30227e-07	6.88643e-06	ENSG00000115008	IL1A	interleukin 1 alpha
56978	121.656	156.496	114.924	151.664	70.3819	39.3326	78.2264	70.5168	100.4	-0.936486	0.188117	-4.9782	6.41775e-07	7.00783e-06	ENSG00000152784	PRDM8	PR/SET domain 8
79781	13.7353	13.6698	12.8795	7.50811	0	0	0	0	5.97409	-1.33191	0.267608	-4.97708	6.45523e-07	7.04395e-06	ENSG00000132321	IQCA1	IQ motif containing with AAA domain 1
63905	1618.81	1432.03	1844.73	1717.86	2148.6	2252.07	2292.43	2329.91	1954.56	0.439019	0.0882511	4.97466	6.53623e-07	7.12747e-06	ENSG00000101363	MANBAL	mannosidase beta like
4605	8253.96	8282.03	7842.6	7384.98	10029.4	10496.2	9518.43	10044.8	8981.55	0.330471	0.0664464	4.9735	6.57534e-07	7.16524e-06	ENSG00000101057	MYBL2	MYB proto-oncogene like 2
5339	11320.9	18800.3	12219.6	12391.4	8906.24	8980.19	7724.53	6323.64	10833.3	-0.720719	0.144983	-4.97105	6.65921e-07	7.25169e-06	ENSG00000178209	PLEC	plectin
10730	5742.35	5072.45	5592.65	5204.62	6625.67	6670.81	7138.49	6980.21	6128.41	0.33802	0.0680151	4.96979	6.70268e-07	7.29406e-06	ENSG00000136758	YME1L1	YME1 like 1 ATPase
84896	1992.6	2304.07	2217.25	2139.81	2663.76	2730.8	2992.49	2938.83	2497.45	0.379395	0.0763541	4.96888	6.73403e-07	7.3232e-06	ENSG00000138138	ATAD1	ATPase family, AAA domain containing 1
57221	481.718	648.61	438.892	405.438	286.415	312.413	315.558	242.044	391.386	-0.724448	0.145947	-4.96378	6.91327e-07	7.51302e-06	ENSG00000112379	ARFGEF3	ARFGEF family member 3
282991	1091.96	844.701	1138.35	1172.77	1479.98	1495.76	1572.48	1599.97	1299.5	0.518535	0.104485	4.96278	6.9491e-07	7.54683e-06	ENSG00000196072	BLOC1S2	biogenesis of lysosomal organelles complex 1 subunit 2
25	2945.25	3557.93	2903.82	2784.01	2275.68	2126.21	2342.82	2009.73	2618.18	-0.465843	0.0938818	-4.96202	6.97644e-07	7.57137e-06	ENSG00000097007	ABL1	ABL proto-oncogene 1, non-receptor tyrosine kinase
22856	1704.16	2037.75	1709	1735.88	1372.45	1402.49	1264.88	1256.91	1560.44	-0.431366	0.0869504	-4.96106	7.0108e-07	7.60351e-06	ENSG00000131873	CHSY1	chondroitin sulfate synthase 1
84679	288.442	287.538	301.181	256.777	172.045	200.034	107.396	105.775	214.898	-0.852442	0.171931	-4.95804	7.12068e-07	7.71745e-06	ENSG00000065923	SLC9A7	solute carrier family 9 member A7
5610	856.496	1236.41	849.053	785.348	593.359	614.712	548.911	430.724	739.377	-0.71734	0.144709	-4.95714	7.15394e-07	7.74824e-06	ENSG00000055332	EIF2AK2	eukaryotic translation initiation factor 2 alpha kinase 2
116372	959.511	805.577	993.699	881.452	1350.94	1160.87	1413.38	1219.75	1098.15	0.484464	0.0977872	4.95426	7.26051e-07	7.85641e-06	ENSG00000150551	LYPD1	LY6/PLAUR domain containing 1
79650	1374.51	1535.26	1421.69	1407.02	1124.16	1114.8	1144.23	1072.05	1274.21	-0.361679	0.0730048	-4.95418	7.26363e-07	7.85641e-06	ENSG00000103005	USB1	U6 snRNA biogenesis phosphodiesterase 1
10474	2292.82	2320.1	2229.14	2459.66	2837.76	2848.8	3115.8	3244.73	2668.6	0.36716	0.0741327	4.95274	7.31759e-07	7.90943e-06	ENSG00000171148	TADA3	transcriptional adaptor 3
5910	1505	1441.46	1503.92	1561.69	1131.98	1118.17	1237.04	1187.35	1335.83	-0.355696	0.0718277	-4.95208	7.34248e-07	7.92562e-06	ENSG00000138698	RAP1GDS1	Rap1 GTPase-GDP dissociation stimulator 1
10130	9594.13	10220.8	9725.97	11311.7	7963.91	8139.6	7228.65	7948.39	9016.64	-0.377325	0.0761935	-4.9522	7.33791e-07	7.92562e-06	ENSG00000143870	PDIA6	protein disulfide isomerase family A member 6
10379	582.771	636.354	641.991	552.597	387.1	287.69	446.819	414.524	493.731	-0.620356	0.125357	-4.94871	7.47069e-07	8.05537e-06	ENSG00000213928	IRF9	interferon regulatory factor 9
401022	171.692	265.855	181.303	288.311	103.618	123.617	108.721	131.504	171.828	-0.851284	0.172023	-4.94866	7.47276e-07	8.05537e-06	ENSG00000224189	HAGLR	HOXD antisense growth-associated long non-coding RNA
284273	511.151	541.608	520.132	506.047	720.437	681.016	693.431	676.58	606.3	0.402265	0.081359	4.94432	7.64086e-07	8.23103e-06	ENSG00000180011	ZADH2	zinc binding alcohol dehydrogenase domain containing 2
103695433	309.045	283.767	324.958	307.833	220.921	184.301	198.881	207.739	254.681	-0.56177	0.113622	-4.94418	7.6466e-07	8.23168e-06	NA	LINC01322	long intergenic non-protein coding RNA 1322
23341	413.041	481.272	364.588	421.956	305.966	278.699	266.5	236.327	346.044	-0.601066	0.121576	-4.94393	7.65627e-07	8.23654e-06	ENSG00000116138	DNAJC16	DnaJ heat shock protein family (Hsp40) member C16
65991	1168.48	810.291	1062.06	1084.17	1484.86	1427.21	1543.31	1660	1280.05	0.548253	0.110986	4.93983	7.81927e-07	8.40624e-06	ENSG00000165775	FUNDC2	FUN14 domain containing 2
9666	568.054	649.081	560.752	533.076	836.763	751.814	944.021	795.696	704.907	0.501047	0.101434	4.93964	7.82655e-07	8.40842e-06	ENSG00000198919	DZIP3	DAZ interacting zinc finger protein 3
10644	2313.42	3033.76	2342.08	2554.26	1962.87	1804.8	1743.52	1730.52	2185.65	-0.485357	0.098264	-4.93932	7.83967e-07	8.41686e-06	ENSG00000073792	IGF2BP2	insulin like growth factor 2 mRNA binding protein 2
283232	109.883	100.874	128.795	136.648	232.651	203.406	185.622	182.962	160.105	0.719867	0.14579	4.93771	7.9044e-07	8.48066e-06	ENSG00000177042	TMEM80	transmembrane protein 80
11213	34.3383	42.895	31.7033	42.0454	10.7528	14.6092	7.95523	12.3881	24.5859	-1.22819	0.248929	-4.93392	8.05965e-07	8.64144e-06	ENSG00000090376	IRAK3	interleukin 1 receptor associated kinase 3
6304	46.1115	39.124	30.7125	34.5373	99.7077	98.8933	68.9453	71.4697	61.1877	0.987148	0.200144	4.93218	8.13189e-07	8.71305e-06	ENSG00000182568	SATB1	SATB homeobox 1
9709	1709.07	1812.9	1683.25	2168.34	1354.85	1248.53	1296.7	1388.42	1582.76	-0.462905	0.0939071	-4.92939	8.2487e-07	8.83229e-06	ENSG00000051108	HERPUD1	homocysteine inducible ER protein with ubiquitin like domain 1
5203	1732.61	1221.8	1698.11	1731.37	2356.82	2528.52	2174.43	2440.45	1985.51	0.552224	0.112048	4.92846	8.28819e-07	8.86864e-06	ENSG00000101132	PFDN4	prefoldin subunit 4
10052	2283.99	2651.95	2147.9	2121.79	1711.65	1663.21	1142.9	1171.15	1861.82	-0.653002	0.132514	-4.92779	8.31648e-07	8.89296e-06	ENSG00000182963	GJC1	gap junction protein gamma 1
84172	802.536	870.155	868.868	764.326	591.404	656.292	616.53	582.24	719.044	-0.428304	0.0869285	-4.92708	8.34664e-07	8.91925e-06	ENSG00000125630	POLR1B	RNA polymerase I subunit B
9145	417.947	352.116	409.17	429.464	566.965	585.494	525.045	593.675	484.985	0.490991	0.0996623	4.92655	8.36947e-07	8.93768e-06	ENSG00000100321	SYNGR1	synaptogyrin 1
79925	107.92	109.359	86.1933	84.0908	177.91	158.454	205.51	154.375	135.476	0.755671	0.153442	4.9248	8.44487e-07	9.00617e-06	ENSG00000152582	SPEF2	sperm flagellar 2
90293	233.501	262.555	283.348	250.771	140.764	131.483	165.734	187.727	206.985	-0.673591	0.136775	-4.92483	8.44349e-07	9.00617e-06	ENSG00000003096	KLHL13	kelch like family member 13
59285	51.9981	71.6487	65.388	63.0681	29.3258	23.5995	29.1692	24.7762	44.8717	-1.03336	0.209866	-4.9239	8.4837e-07	9.04155e-06	ENSG00000130433	CACNG6	calcium voltage-gated channel auxiliary subunit gamma 6
26273	847.666	707.06	767.813	701.258	1075.28	1028.27	1058.05	968.176	894.196	0.4376	0.0889025	4.92225	8.55559e-07	9.1121e-06	ENSG00000110429	FBXO3	F-box protein 3
7071	1031.13	1182.2	1084.85	1094.68	859.246	859.698	769.006	815.708	962.065	-0.403098	0.0819176	-4.92077	8.62048e-07	9.1751e-06	ENSG00000155090	KLF10	Kruppel like factor 10
6603	2219.24	2211.68	2531.31	2291.48	2948.22	2829.7	3194.03	3375.28	2700.12	0.407153	0.0827495	4.9203	8.64108e-07	9.19092e-06	ENSG00000108604	SMARCD2	SWI/SNF related, matrix associated, actin dependent regulator of chromatin, subfamily d, member 2
9590	18887.1	28206	19174.5	18479	13170.2	13193.3	14942.6	13259.1	17414	-0.603027	0.122607	-4.91839	8.72607e-07	9.27514e-06	ENSG00000131016	AKAP12	A-kinase anchoring protein 12
64342	259.99	275.282	274.431	264.286	380.258	369.726	465.381	375.454	333.101	0.53829	0.10948	4.9168	8.79716e-07	9.3445e-06	ENSG00000118960	HS1BP3	HCLS1 binding protein 3
23266	96.1473	100.403	102.045	87.0941	49.8539	35.9612	62.316	40.976	71.8495	-0.912108	0.185572	-4.91513	8.87245e-07	9.41822e-06	ENSG00000117114	ADGRL2	adhesion G protein-coupled receptor L2
79665	2263.39	2215.45	2113.22	1914.57	2662.78	2680.23	3033.59	2922.63	2475.73	0.398568	0.0810976	4.91467	8.89302e-07	9.43379e-06	ENSG00000108406	DHX40	DEAH-box helicase 40
4552	1179.28	1082.27	1124.48	1051.14	1345.08	1447.44	1671.92	1605.69	1313.41	0.438886	0.0893225	4.91349	8.94684e-07	9.4846e-06	ENSG00000124275	MTRR	5-methyltetrahydrofolate-homocysteine methyltransferase reductase
23232	412.06	386.055	408.18	333.36	505.381	609.093	563.496	546.982	470.576	0.506207	0.103034	4.91299	8.96998e-07	9.50283e-06	ENSG00000108239	TBC1D12	TBC1 domain family member 12
8435	17.6597	12.2557	21.796	9.00973	40.0786	50.5705	39.7762	52.4111	30.4447	1.184	0.241124	4.91033	9.09221e-07	9.62595e-06	ENSG00000167780	SOAT2	sterol O-acyltransferase 2
22911	440.512	472.316	394.309	405.438	576.741	587.741	629.789	609.875	514.59	0.466635	0.0950407	4.90984	9.11494e-07	9.64363e-06	ENSG00000085433	WDR47	WD repeat domain 47
55916	663.22	567.062	660.815	554.099	929.628	963.086	796.849	812.849	743.451	0.500666	0.10208	4.90463	9.36034e-07	9.89672e-06	ENSG00000101888	NXT2	nuclear transport factor 2 like export factor 2
51804	257.047	326.662	207.062	291.315	165.202	166.321	151.149	151.516	214.534	-0.717221	0.146264	-4.9036	9.40948e-07	9.9421e-06	ENSG00000100625	SIX4	SIX homeobox 4
3667	1004.64	1531.49	1064.04	1192.29	734.122	752.938	843.255	749.003	983.972	-0.608196	0.12405	-4.90284	9.44611e-07	9.97422e-06	ENSG00000169047	IRS1	insulin receptor substrate 1
51029	2356.59	2385.62	2203.38	2124.8	2771.29	2838.69	3212.59	3050.33	2617.91	0.378843	0.0772744	4.90256	9.45941e-07	9.97509e-06	ENSG00000121644	DESI2	desumoylating isopeptidase 2
3720	1376.48	1640.38	1276.06	1318.42	1000.99	1065.35	1007.66	928.153	1201.69	-0.475947	0.0970794	-4.90266	9.45494e-07	9.97509e-06	ENSG00000008083	JARID2	jumonji and AT-rich interaction domain containing 2
5530	1246.97	1365.1	1102.68	1207.3	940.38	942.858	873.75	863.354	1067.8	-0.433979	0.0885278	-4.90218	9.47795e-07	9.98806e-06	ENSG00000138814	PPP3CA	protein phosphatase 3 catalytic subunit alpha
57594	201.125	303.564	240.747	252.273	156.404	164.073	118.003	124.834	195.128	-0.758845	0.154824	-4.90135	9.51815e-07	1.00238e-05	ENSG00000215271	HOMEZ	homeobox and leucine zipper encoding
23367	6234.86	7370.39	6082.07	6041.03	4593.4	4960.4	3346.5	3242.82	5233.93	-0.634152	0.129411	-4.90028	9.57022e-07	1.0072e-05	ENSG00000155506	LARP1	La ribonucleoprotein domain family member 1
84733	184.446	206.933	230.839	201.217	127.078	122.493	129.935	134.363	167.163	-0.640957	0.130825	-4.89934	9.61599e-07	1.01135e-05	ENSG00000173894	CBX2	chromobox 2
644943	5.88657	6.12785	9.90727	10.5114	26.3932	42.7039	22.5398	33.3525	19.6778	1.29432	0.264196	4.89909	9.62828e-07	1.01198e-05	ENSG00000189431	RASSF10	Ras association domain family member 10
79680	547.451	646.253	611.279	611.16	471.168	418.049	375.222	427.865	513.556	-0.495094	0.101072	-4.89843	9.6605e-07	1.0147e-05	ENSG00000215012	RTL10	retrotransposon Gag like 10
10250	2086.79	2746.69	1871.48	2019.68	1519.08	1482.28	916.177	987.235	1703.68	-0.760737	0.155339	-4.89728	9.71717e-07	1.01998e-05	ENSG00000133226	SRRM1	serine and arginine repetitive matrix 1
7690	1474.59	1238.3	1477.17	1282.39	1766.39	1773.34	2015.33	1892.52	1615	0.433208	0.0884893	4.8956	9.80077e-07	1.02808e-05	ENSG00000172262	ZNF131	zinc finger protein 131
1645	5.88657	22.6259	20.8053	28.5308	1.95505	0	2.65174	0.95293	10.426	-1.3503	0.275844	-4.89517	9.82224e-07	1.02966e-05	ENSG00000187134	AKR1C1	aldo-keto reductase family 1 member C1
5819	2475.3	2713.22	2552.11	2744.97	2050.85	1975.62	1988.81	2186.02	2335.86	-0.347895	0.0710981	-4.89317	9.92246e-07	1.03949e-05	ENSG00000130202	NECTIN2	nectin cell adhesion molecule 2
5747	1933.74	2258.35	2084.49	2024.19	1378.31	1660.96	1601.65	1541.84	1810.44	-0.416908	0.085209	-4.89277	9.9429e-07	1.04095e-05	ENSG00000169398	PTK2	protein tyrosine kinase 2
6652	838.837	899.38	927.321	876.947	653.965	666.406	711.993	665.145	779.999	-0.387277	0.07917	-4.89172	9.99606e-07	1.04583e-05	ENSG00000140263	SORD	sorbitol dehydrogenase
9125	2125.05	2099.97	2124.12	2180.36	1693.08	1778.96	1665.3	1739.1	1925.74	-0.305677	0.0624943	-4.89129	1.0018e-06	1.04743e-05	ENSG00000144580	CNOT9	CCR4-NOT transcription complex subunit 9
6747	10060.2	10312.2	9020.57	10511.4	7839.76	8060.93	6565.72	7257.51	8703.53	-0.414613	0.0847702	-4.89102	1.00313e-06	1.04814e-05	ENSG00000114850	SSR3	signal sequence receptor subunit 3
8904	2514.55	2347.91	2766.11	2524.23	3249.3	3294.95	3117.12	3397.19	2901.42	0.35802	0.07325	4.88765	1.02047e-06	1.06557e-05	ENSG00000214078	CPNE1	copine 1
79901	1713.97	1901.52	1650.55	1777.92	1309.89	1284.49	1376.26	1425.58	1555.02	-0.378129	0.0773706	-4.88724	1.02257e-06	1.06637e-05	ENSG00000071967	CYBRD1	cytochrome b reductase 1
4318	44.1493	31.1106	31.7033	40.5438	8.79774	10.1141	2.65174	15.2469	23.0397	-1.28057	0.262017	-4.88735	1.02204e-06	1.06637e-05	ENSG00000100985	MMP9	matrix metallopeptidase 9
2356	1970.04	1697.89	1870.49	1911.57	1398.84	1485.65	1410.73	1450.36	1649.44	-0.365726	0.0748357	-4.88706	1.02354e-06	1.06668e-05	ENSG00000136877	FPGS	folylpolyglutamate synthase
54494	110.864	78.248	115.915	130.641	181.82	170.816	222.746	221.08	154.016	0.806973	0.165134	4.88677	1.02502e-06	1.06753e-05	ENSG00000180425	C11orf71	chromosome 11 open reading frame 71
79870	124.599	89.5609	90.1562	115.625	187.685	158.454	254.567	183.915	150.57	0.818212	0.167489	4.88518	1.03333e-06	1.07549e-05	ENSG00000164929	BAALC	BAALC, MAP3K1 and KLF4 binding
162073	1072.34	1154.39	990.727	1039.12	819.167	752.938	527.697	545.076	862.682	-0.645227	0.132094	-4.88461	1.03633e-06	1.0779e-05	ENSG00000205730	ITPRIPL2	ITPRIP like 2
25898	740.727	696.218	759.888	725.284	562.078	566.389	495.876	543.17	636.204	-0.417117	0.0854373	-4.88214	1.04939e-06	1.09078e-05	ENSG00000163743	RCHY1	ring finger and CHY zinc finger domain containing 1
4141	3995.02	4289.5	4223.47	4646.02	3156.43	3258.99	3349.15	3551.57	3808.77	-0.358201	0.0733996	-4.88015	1.06007e-06	1.10117e-05	ENSG00000166986	MARS	methionyl-tRNA synthetase
8450	2448.81	2544.47	2298.49	2106.78	3182.83	3263.48	2958.02	2991.25	2724.27	0.388846	0.0797242	4.87739	1.07496e-06	1.11519e-05	ENSG00000158290	CUL4B	cullin 4B
64283	647.523	894.666	734.129	794.358	440.864	492.219	579.406	510.77	636.742	-0.577558	0.118413	-4.87748	1.0745e-06	1.11519e-05	ENSG00000214944	ARHGEF28	Rho guanine nucleotide exchange factor 28
55737	4121.58	4390.84	4199.69	4132.46	5207.28	4925.56	5608.44	5457.43	4755.41	0.326098	0.066871	4.87652	1.07974e-06	1.11942e-05	ENSG00000069329	VPS35	VPS35, retromer complex component
6320	196.219	144.712	186.257	211.729	121.213	97.7696	96.7886	85.7637	142.556	-0.784874	0.160991	-4.87527	1.08662e-06	1.12582e-05	ENSG00000105472	CLEC11A	C-type lectin domain containing 11A
79705	297.272	355.415	275.422	253.774	185.73	196.663	192.251	164.857	240.173	-0.649	0.133164	-4.87371	1.09523e-06	1.13401e-05	ENSG00000154237	LRRK1	leucine rich repeat kinase 1
27340	1277.39	1523.48	1265.16	1214.81	944.291	874.307	1039.48	931.965	1133.86	-0.468215	0.096079	-4.87323	1.09789e-06	1.13603e-05	ENSG00000120800	UTP20	UTP20, small subunit processome component
58190	1163.58	1157.22	1169.06	1208.81	871.954	926.001	876.401	966.271	1042.41	-0.359412	0.0737561	-4.87298	1.09927e-06	1.13672e-05	ENSG00000144579	CTDSP1	CTD small phosphatase 1
79707	695.597	778.709	623.167	618.668	480.943	479.857	312.906	414.524	550.546	-0.645363	0.132444	-4.87273	1.10065e-06	1.13741e-05	ENSG00000162408	NOL9	nucleolar protein 9
23385	2310.48	2589.72	2304.43	2351.54	1855.35	1892.46	1869.48	1924.92	2137.3	-0.337641	0.0693247	-4.87043	1.11357e-06	1.15002e-05	ENSG00000162736	NCSTN	nicastrin
29954	534.697	543.493	477.53	528.571	357.775	366.355	387.155	393.56	448.642	-0.458064	0.0940615	-4.86984	1.1169e-06	1.15272e-05	ENSG00000009830	POMT2	protein O-mannosyltransferase 2
411	364.967	481.743	347.745	397.93	284.46	260.719	217.443	222.033	322.13	-0.653891	0.134352	-4.86701	1.13299e-06	1.16856e-05	ENSG00000113273	ARSB	arylsulfatase B
83595	36.3005	52.7938	37.6476	37.5406	15.6404	12.3617	11.9328	14.2939	27.3139	-1.1853	0.243815	-4.86149	1.16506e-06	1.20086e-05	ENSG00000171056	SOX7	SRY-box 7
8650	1568.77	1679.5	1634.7	1576.7	1174.01	1173.23	1335.15	1295.98	1429.76	-0.370623	0.0762399	-4.86127	1.16633e-06	1.20141e-05	ENSG00000133961	NUMB	NUMB, endocytic adaptor protein
23186	1277.39	1357.08	1165.1	1091.68	920.83	951.848	814.085	793.79	1046.47	-0.478135	0.0983637	-4.86089	1.16859e-06	1.20296e-05	ENSG00000089902	RCOR1	REST corepressor 1
55117	508.207	471.373	509.234	498.539	378.303	364.107	311.58	356.396	424.717	-0.473419	0.0974543	-4.85786	1.18664e-06	1.22075e-05	ENSG00000072041	SLC6A15	solute carrier family 6 member 15
10410	1626.66	1573.44	1739.72	1860.51	1258.08	1374.39	1042.14	1078.72	1444.21	-0.496493	0.102207	-4.85773	1.1874e-06	1.22075e-05	ENSG00000142089	IFITM3	interferon induced transmembrane protein 3
5569	603.374	613.728	585.52	581.128	418.381	393.326	474.662	449.783	514.988	-0.447962	0.0922318	-4.85692	1.19228e-06	1.22492e-05	ENSG00000171033	PKIA	cAMP-dependent protein kinase inhibitor alpha
79807	865.326	889.481	858.96	660.714	538.617	587.741	593.991	556.511	693.918	-0.511196	0.105254	-4.8568	1.19299e-06	1.22492e-05	ENSG00000138780	GSTCD	glutathione S-transferase C-terminal domain containing
2678	993.85	1197.76	1181.94	1180.28	837.74	839.47	818.063	882.413	991.438	-0.420098	0.0865949	-4.8513	1.22653e-06	1.25855e-05	ENSG00000100031	GGT1	gamma-glutamyltransferase 1
57198	842.761	1136.95	967.94	1001.58	755.628	648.426	689.453	630.839	834.198	-0.517454	0.10667	-4.85098	1.22852e-06	1.25978e-05	ENSG00000143515	ATP8B2	ATPase phospholipid transporting 8B2
5018	1950.42	1621.05	1874.46	1821.47	1392	1396.87	1390.84	1356.97	1600.51	-0.382632	0.0788865	-4.85041	1.2321e-06	1.26264e-05	ENSG00000155463	OXA1L	OXA1L, mitochondrial inner membrane protein
92345	513.113	547.264	614.251	522.565	357.775	411.306	377.873	405.948	468.762	-0.48514	0.100073	-4.84785	1.24808e-06	1.2782e-05	ENSG00000145414	NAF1	nuclear assembly factor 1 ribonucleoprotein
6289	36.3005	40.0667	57.4622	43.547	6.84269	12.3617	21.214	14.2939	29.0111	-1.21708	0.251087	-4.84723	1.25196e-06	1.28136e-05	ENSG00000134339	SAA2	serum amyloid A2
51222	267.839	355.415	329.912	337.865	221.899	194.415	209.488	213.456	266.286	-0.591329	0.121997	-4.84708	1.2529e-06	1.2815e-05	ENSG00000165804	ZNF219	zinc finger protein 219
23595	1359.8	1253.85	1312.71	1274.88	1569.91	1694.67	2006.04	1778.17	1531.25	0.426524	0.088022	4.84566	1.26192e-06	1.2899e-05	ENSG00000135336	ORC3	origin recognition complex subunit 3
259230	303.158	279.996	286.32	301.826	387.1	433.782	403.065	416.43	351.46	0.474781	0.0980061	4.8444	1.26996e-06	1.29729e-05	ENSG00000198964	SGMS1	sphingomyelin synthase 1
58499	284.518	472.787	413.133	283.807	217.988	219.139	189.6	159.139	280.014	-0.807556	0.166782	-4.84199	1.28545e-06	1.31227e-05	ENSG00000148143	ZNF462	zinc finger protein 462
84419	126.561	101.345	117.897	118.628	52.7864	69.6749	64.9677	60.9875	89.106	-0.808331	0.166981	-4.84086	1.29279e-06	1.31892e-05	ENSG00000166920	C15orf48	chromosome 15 open reading frame 48
55751	607.298	642.953	578.585	549.594	409.584	447.268	433.56	445.971	514.351	-0.447176	0.0923861	-4.8403	1.29642e-06	1.32179e-05	ENSG00000164168	TMEM184C	transmembrane protein 184C
51639	1814.05	1423.55	1698.11	2007.67	2248.31	2544.26	2532.42	2662.49	2116.35	0.508075	0.104976	4.83989	1.29909e-06	1.32366e-05	ENSG00000115128	SF3B6	splicing factor 3b subunit 6
10785	427.758	493.056	432.948	494.034	309.876	353.993	282.411	322.09	389.521	-0.520429	0.10755	-4.83896	1.30518e-06	1.32902e-05	ENSG00000160193	WDR4	WD repeat domain 4
11104	613.185	508.14	604.343	590.138	845.56	751.814	786.242	796.649	687.009	0.450355	0.0930736	4.8387	1.30692e-06	1.32995e-05	ENSG00000186625	KATNA1	katanin catalytic subunit A1
10673	34.3383	32.0534	28.7311	28.5308	11.7303	6.74273	3.97762	9.5293	19.4542	-1.26481	0.26145	-4.83769	1.31358e-06	1.33588e-05	ENSG00000102524	TNFSF13B	TNF superfamily member 13b
10726	4463.98	3841.22	4540.5	4769.15	3393.97	3418.56	3005.75	3329.54	3845.34	-0.410372	0.0848437	-4.8368	1.31943e-06	1.34098e-05	ENSG00000090273	NUDC	nuclear distribution C, dynein complex regulator
9124	4042.11	3465.54	4370.1	4425.28	6546.49	6054.97	5113.89	5440.27	4932.33	0.490033	0.101341	4.83547	1.32834e-06	1.34917e-05	ENSG00000107438	PDLIM1	PDZ and LIM domain 1
163786	639.674	586.86	553.816	507.548	804.504	732.71	803.478	859.542	686.017	0.465548	0.0963101	4.83385	1.3392e-06	1.35934e-05	ENSG00000156876	SASS6	SAS-6 centriolar assembly protein
100506365	946.757	905.037	962.987	869.439	1136.86	1176.61	1390.84	1279.78	1083.54	0.422937	0.087551	4.83075	1.36018e-06	1.37976e-05	ENSG00000253738	OTUD6B-AS1	OTUD6B antisense RNA 1 (head to head)
2872	825.101	886.182	819.331	785.348	587.493	633.816	664.262	545.076	718.326	-0.441607	0.0914363	-4.82967	1.36757e-06	1.38637e-05	ENSG00000099875	MKNK2	MAP kinase interacting serine/threonine kinase 2
93487	2712.73	2780.63	2455.02	2677.39	2093.86	1965.51	1400.12	1474.18	2194.93	-0.584866	0.121112	-4.82914	1.37126e-06	1.38924e-05	ENSG00000168175	MAPK1IP1L	mitogen-activated protein kinase 1 interacting protein 1 like
57462	539.602	718.844	490.41	603.652	348.977	415.802	385.829	366.878	483.749	-0.603803	0.125058	-4.82818	1.3779e-06	1.39419e-05	ENSG00000164976	MYORG	myogenesis regulating glycosidase (putative)
79817	9.81095	31.582	16.8424	33.0357	2.93258	3.37136	1.32587	3.81172	12.8391	-1.34464	0.278494	-4.82824	1.37742e-06	1.39419e-05	ENSG00000120162	MOB3B	MOB kinase activator 3B
36	429.72	449.219	420.068	339.367	532.752	609.093	735.859	636.557	519.079	0.578641	0.119859	4.82768	1.3813e-06	1.39676e-05	ENSG00000196177	ACADSB	acyl-CoA dehydrogenase short/branched chain
26030	1016.41	1243.95	1202.74	1090.18	802.549	799.013	879.053	863.354	987.157	-0.436472	0.0904161	-4.82737	1.38351e-06	1.3981e-05	ENSG00000126822	PLEKHG3	pleckstrin homology and RhoGEF domain containing G3
1025	989.925	949.346	1051.16	974.553	781.044	770.919	620.508	704.215	855.209	-0.447165	0.0926358	-4.82713	1.38516e-06	1.39828e-05	ENSG00000136807	CDK9	cyclin dependent kinase 9
5361	1246.97	1845.9	1402.87	1512.13	951.133	1042.88	1083.24	944.353	1253.68	-0.555932	0.115172	-4.82696	1.38631e-06	1.39828e-05	ENSG00000114554	PLXNA1	plexin A1
2920	75.5443	61.2785	81.2396	82.5892	32.2584	40.4564	17.2363	33.3525	52.9944	-1.03012	0.213405	-4.82708	1.38552e-06	1.39828e-05	ENSG00000081041	CXCL2	C-X-C motif chemokine ligand 2
412	289.423	419.994	306.135	316.842	231.674	198.91	189.6	189.633	267.776	-0.676224	0.140107	-4.82649	1.38959e-06	1.40071e-05	ENSG00000101846	STS	steroid sulfatase
8490	109.883	93.8033	103.036	103.612	148.584	182.054	182.97	165.81	136.219	0.681492	0.141252	4.82467	1.40235e-06	1.41241e-05	ENSG00000143248	RGS5	regulator of G protein signaling 5
7092	343.383	449.219	346.754	372.402	249.269	203.406	279.759	214.409	307.325	-0.642419	0.133159	-4.82446	1.40385e-06	1.41241e-05	ENSG00000038295	TLL1	tolloid like 1
163732	59.8468	73.5342	80.2489	64.5698	11.7303	13.4855	38.4503	30.4937	46.5449	-1.17186	0.242898	-4.82451	1.40348e-06	1.41241e-05	ENSG00000179862	CITED4	Cbp/p300 interacting transactivator with Glu/Asp rich carboxy-terminal domain 4
23204	13448.9	13308.8	12354.4	13851	16487.9	16064.6	16192.9	16014.9	14715.4	0.286938	0.0595186	4.82097	1.42861e-06	1.43642e-05	ENSG00000170540	ARL6IP1	ADP ribosylation factor like GTPase 6 interacting protein 1
23336	366.93	480.801	358.643	379.91	719.46	568.637	662.936	541.264	509.823	0.609278	0.126395	4.82043	1.43249e-06	1.43942e-05	ENSG00000182253	SYNM	synemin
968	1816.01	1941.12	2041.89	1747.89	2330.42	2385.8	2661.02	2798.75	2215.36	0.419118	0.086952	4.82011	1.4348e-06	1.44083e-05	ENSG00000129226	CD68	CD68 molecule
84914	663.22	769.753	602.362	537.581	458.46	428.163	315.558	275.397	506.312	-0.737449	0.153002	-4.81987	1.43649e-06	1.44163e-05	ENSG00000198466	ZNF587	zinc finger protein 587
55975	803.517	747.598	793.572	810.876	974.594	1049.62	999.707	1068.23	905.965	0.371139	0.0770061	4.8196	1.43846e-06	1.44269e-05	ENSG00000122550	KLHL7	kelch like family member 7
51506	1802.27	1363.68	1892.29	1878.53	2376.37	2345.35	2680.91	2987.43	2165.85	0.558628	0.115911	4.81946	1.43947e-06	1.44281e-05	ENSG00000143222	UFC1	ubiquitin-fold modifier conjugating enzyme 1
6240	6383.01	5816.27	6258.42	5764.73	7410.63	7256.3	8105.05	8222.83	6902.16	0.349461	0.0725155	4.81912	1.44194e-06	1.44336e-05	ENSG00000167325	RRM1	ribonucleotide reductase catalytic subunit M1
694	805.479	763.153	686.574	743.303	565.01	542.79	550.237	575.569	654.014	-0.414656	0.0860459	-4.81901	1.44273e-06	1.44336e-05	ENSG00000133639	BTG1	BTG anti-proliferation factor 1
1296	46.1115	59.393	50.5271	58.5633	24.4382	23.5995	5.30349	15.2469	35.3979	-1.18428	0.245748	-4.81908	1.44223e-06	1.44336e-05	ENSG00000171812	COL8A2	collagen type VIII alpha 2 chain
114926	395.381	313.463	423.04	390.422	672.538	492.219	560.844	629.886	484.724	0.603348	0.125274	4.81623	1.46294e-06	1.46267e-05	ENSG00000176209	SMIM19	small integral membrane protein 19
9563	1103.73	1513.11	1112.59	1093.18	862.178	825.984	605.923	543.17	957.483	-0.709138	0.147283	-4.81479	1.47351e-06	1.47231e-05	ENSG00000049239	H6PD	hexose-6-phosphate dehydrogenase/glucose 1-dehydrogenase
84319	1554.06	1193.99	1515.81	1578.21	2004.91	2116.09	1907.93	2355.64	1778.33	0.505334	0.104991	4.8131	1.48608e-06	1.48394e-05	ENSG00000184220	CMSS1	cms1 ribosomal small subunit homolog
348013	26.4896	28.7538	25.7589	34.5373	7.82021	6.74273	5.30349	9.5293	18.1169	-1.26381	0.262649	-4.81179	1.49585e-06	1.49277e-05	ENSG00000184497	TMEM255B	transmembrane protein 255B
9924	339.459	286.124	349.727	279.302	497.561	431.535	485.269	434.536	387.939	0.53567	0.111351	4.81066	1.5043e-06	1.50027e-05	ENSG00000135473	PAN2	poly(A) specific ribonuclease subunit PAN2
3675	15300.2	20486.4	16462.9	17746.2	11653.1	11275	13889.8	12608.2	14927.7	-0.485186	0.100862	-4.8104	1.50631e-06	1.50134e-05	ENSG00000005884	ITGA3	integrin subunit alpha 3
58	5.88657	80.1335	9.90727	39.0422	0.977527	0	2.65174	1.90586	17.5631	-1.29177	0.268574	-4.80975	1.51122e-06	1.50529e-05	ENSG00000143632	ACTA1	actin, alpha 1, skeletal muscle
57291	1046.83	655.209	969.922	1016.6	1343.12	1415.97	1442.55	1703.84	1199.25	0.641525	0.133389	4.80944	1.5135e-06	1.50663e-05	ENSG00000226950	DANCR	differentiation antagonizing non-protein coding RNA
51098	1207.73	892.31	1119.52	1153.25	1432.08	1495.76	1677.23	1702.89	1335.09	0.511656	0.106417	4.80801	1.5244e-06	1.51653e-05	ENSG00000101052	IFT52	intraflagellar transport 52
196394	144.221	106.059	106.008	97.6054	180.842	177.559	202.858	239.185	156.792	0.747371	0.155497	4.80635	1.53714e-06	1.52825e-05	ENSG00000151743	AMN1	antagonist of mitotic exit network 1 homolog
51752	2305.57	2648.17	2381.71	2172.85	1498.55	1668.83	1785.95	1911.58	2046.65	-0.457603	0.0952285	-4.80532	1.54505e-06	1.53517e-05	ENSG00000164307	ERAP1	endoplasmic reticulum aminopeptidase 1
5359	743.67	651.438	689.546	752.313	559.145	515.819	482.617	500.288	611.855	-0.444156	0.0924455	-4.80452	1.55124e-06	1.53941e-05	ENSG00000188313	PLSCR1	phospholipid scramblase 1
648791	24.5274	29.6965	23.7774	24.026	1.95505	4.49515	9.2811	6.67051	15.5536	-1.30627	0.27188	-4.80459	1.55073e-06	1.53941e-05	ENSG00000219607	PPP1R3G	protein phosphatase 1 regulatory subunit 3G
390963	3.92438	4.24236	2.97218	4.50487	23.4606	22.4758	21.214	15.2469	12.2551	1.32175	0.275121	4.80424	1.55343e-06	1.54063e-05	NA	ZNF818P	zinc finger protein 818, pseudogene
113802	41.206	40.5381	49.5364	67.573	19.5505	13.4855	14.5846	20.0115	33.3107	-1.14292	0.237967	-4.80287	1.56411e-06	1.55025e-05	ENSG00000162639	HENMT1	HEN methyltransferase 1
2802	2296.74	2781.1	2180.59	2055.72	1662.77	1703.66	1075.28	1175.92	1866.47	-0.679444	0.141511	-4.80133	1.57614e-06	1.56024e-05	ENSG00000090615	GOLGA3	golgin A3
5289	872.194	1017.22	1012.52	885.957	1258.08	1174.36	1446.53	1399.85	1133.34	0.460969	0.0960078	4.80138	1.57579e-06	1.56024e-05	ENSG00000078142	PIK3C3	phosphatidylinositol 3-kinase catalytic subunit type 3
4037	28.4518	44.7805	34.6754	37.5406	87.9774	62.9321	90.1593	82.9049	58.6777	0.960759	0.200136	4.80053	1.58248e-06	1.56555e-05	ENSG00000130881	LRP3	LDL receptor related protein 3
5874	61.809	58.9217	66.3787	54.0584	99.7077	124.74	133.913	99.1047	87.3292	0.816491	0.170242	4.79604	1.61829e-06	1.59999e-05	ENSG00000041353	RAB27B	RAB27B, member RAS oncogene family
6468	800.574	778.709	836.174	858.928	1044	1055.24	1018.27	1113.02	938.114	0.367031	0.0765445	4.795	1.62672e-06	1.60634e-05	ENSG00000107829	FBXW4	F-box and WD repeat domain containing 4
5205	1663.94	2370.54	1610.92	1836.48	1204.31	1109.18	1353.72	1260.73	1551.23	-0.575207	0.119958	-4.79507	1.62617e-06	1.60634e-05	ENSG00000081923	ATP8B1	ATPase phospholipid transporting 8B1
2744	19917.2	18918.1	17665.7	18027	15044.1	15606	13578.3	13463	16527.4	-0.362537	0.0756354	-4.79323	1.64121e-06	1.61964e-05	ENSG00000115419	GLS	glutaminase
7247	2848.12	2815.98	2783.94	2940.18	2285.46	2336.36	2200.95	2396.62	2575.95	-0.299619	0.062514	-4.79284	1.64438e-06	1.62178e-05	ENSG00000211460	TSN	translin
54965	680.88	553.392	541.928	584.131	809.392	783.28	810.108	887.177	706.286	0.466349	0.0973064	4.79258	1.64647e-06	1.62283e-05	ENSG00000163964	PIGX	phosphatidylinositol glycan anchor biosynthesis class X
646576	160.9	132.456	103.036	159.172	60.6066	79.789	68.9453	78.1402	105.381	-0.838165	0.174931	-4.79139	1.65627e-06	1.63148e-05	ENSG00000248890	HHIP-AS1	HHIP antisense RNA 1
6832	652.428	600.53	657.843	654.707	829.92	812.499	833.973	901.471	742.921	0.392512	0.0819615	4.78898	1.67635e-06	1.65025e-05	ENSG00000156502	SUPV3L1	Suv3 like RNA helicase
79070	640.655	539.251	690.537	624.675	874.886	782.156	1081.91	984.376	777.306	0.553486	0.115579	4.78881	1.6777e-06	1.65056e-05	ENSG00000134901	KDELC1	KDEL motif containing 1
92305	1051.73	993.183	1050.17	1126.22	818.19	823.737	790.22	684.203	917.207	-0.42454	0.0886658	-4.78809	1.68379e-06	1.65553e-05	ENSG00000168936	TMEM129	transmembrane protein 129
55240	890.835	1291.56	988.746	1136.73	679.381	712.482	779.613	725.179	900.566	-0.549754	0.114848	-4.78678	1.69476e-06	1.6653e-05	ENSG00000115107	STEAP3	STEAP3 metalloreductase
114787	1219.5	1296.28	1273.08	1105.19	813.302	884.421	928.11	986.282	1063.27	-0.429534	0.0897813	-4.78422	1.71652e-06	1.68564e-05	ENSG00000169258	GPRIN1	G protein regulated inducer of neurite outgrowth 1
441478	22.5652	33.4675	21.796	22.5243	4.88763	6.74273	3.97762	6.67051	15.3289	-1.29642	0.270985	-4.7841	1.71758e-06	1.68565e-05	ENSG00000198435	NRARP	NOTCH regulated ankyrin repeat protein
3872	46.1115	51.8511	33.6847	67.573	16.618	19.1044	18.5622	15.2469	33.594	-1.13961	0.238244	-4.78336	1.72388e-06	1.6908e-05	ENSG00000128422	KRT17	keratin 17
55161	1568.77	1621.05	1420.7	1668.3	1288.38	1158.63	1012.97	1115.88	1356.84	-0.44191	0.0923906	-4.78307	1.72639e-06	1.69223e-05	ENSG00000109133	TMEM33	transmembrane protein 33
50940	34.3383	59.393	58.4529	48.0519	19.5505	23.5995	10.607	12.3881	33.2977	-1.17187	0.245102	-4.78113	1.74315e-06	1.7076e-05	ENSG00000128655	PDE11A	phosphodiesterase 11A
79594	1107.66	1140.72	1193.83	1148.74	933.538	860.822	884.357	909.095	1022.34	-0.34843	0.0729155	-4.77855	1.76568e-06	1.72862e-05	ENSG00000090432	MUL1	mitochondrial E3 ubiquitin protein ligase 1
84820	147.164	131.513	183.285	138.149	239.494	252.852	236.005	228.703	194.646	0.636499	0.133227	4.77756	1.77431e-06	1.736e-05	ENSG00000214783	POLR2J4	RNA polymerase II subunit J4, pseudogene
9086	854.534	656.623	812.396	828.896	1131.98	1154.13	995.73	1191.16	953.181	0.492439	0.103082	4.77716	1.77784e-06	1.7384e-05	ENSG00000198692	EIF1AY	eukaryotic translation initiation factor 1A Y-linked
65055	10.792	20.7404	23.7774	16.5178	35.191	64.0559	53.0349	59.0816	35.3989	1.14831	0.240606	4.77258	1.81882e-06	1.7763e-05	ENSG00000068615	REEP1	receptor accessory protein 1
122830	920.267	941.332	916.423	891.964	729.235	714.729	550.237	611.781	784.496	-0.476698	0.0998807	-4.77268	1.81791e-06	1.7763e-05	ENSG00000139977	NAA30	N(alpha)-acetyltransferase 30, NatC catalytic subunit
4983	270.782	399.253	264.524	297.321	180.842	168.568	212.14	161.045	244.31	-0.719686	0.15083	-4.7715	1.8286e-06	1.78475e-05	ENSG00000079482	OPHN1	oligophrenin 1
113146	367.911	595.344	438.892	384.415	282.505	256.224	265.174	169.621	345.011	-0.795933	0.166887	-4.7693	1.84871e-06	1.80329e-05	ENSG00000185567	AHNAK2	AHNAK nucleoprotein 2
6513	4957.47	5621.13	5011.1	5234.66	4043.05	3848.97	4192.41	4307.24	4652	-0.340047	0.0713031	-4.76904	1.85107e-06	1.80338e-05	ENSG00000117394	SLC2A1	solute carrier family 2 member 1
90362	82.412	98.9884	65.388	123.133	37.146	50.5705	41.102	26.682	65.6777	-1.02247	0.214394	-4.76913	1.8502e-06	1.80338e-05	ENSG00000169122	FAM110B	family with sequence similarity 110 member B
84109	45.1304	51.8511	66.3787	51.0552	10.7528	13.4855	14.5846	30.4937	35.4665	-1.17439	0.246363	-4.76691	1.87073e-06	1.82143e-05	ENSG00000186867	QRFPR	pyroglutamylated RFamide peptide receptor
599	718.162	671.236	658.833	662.215	459.437	456.258	519.742	541.264	585.893	-0.443013	0.0929577	-4.76575	1.88156e-06	1.83085e-05	ENSG00000129473	BCL2L2	BCL2 like 2
7799	816.271	1050.69	803.48	728.287	507.336	575.379	621.834	553.652	707.116	-0.568317	0.119296	-4.76393	1.89857e-06	1.84629e-05	ENSG00000116731	PRDM2	PR/SET domain 2
25891	21.5841	28.7538	21.796	39.0422	52.7864	61.8083	103.418	68.6109	49.725	1.08246	0.227485	4.75835	1.95177e-06	1.89687e-05	ENSG00000149090	PAMR1	peptidase domain containing associated with muscle regeneration 1
3014	4448.29	4279.13	4380	4252.59	5953.14	5442.51	5132.45	5283.99	4896.51	0.324569	0.0682591	4.75496	1.9849e-06	1.92789e-05	ENSG00000188486	H2AFX	H2A histone family member X
8079	5664.84	4939.52	5694.7	5533.48	6784.03	6767.45	6865.36	7496.7	6218.26	0.349014	0.0734085	4.75441	1.99026e-06	1.93193e-05	ENSG00000089693	MLF2	myeloid leukemia factor 2
7701	413.041	583.56	451.772	459.496	315.741	337.136	304.951	249.668	389.421	-0.627391	0.132021	-4.75221	2.01204e-06	1.95189e-05	ENSG00000115568	ZNF142	zinc finger protein 142
26586	5781.6	6090.61	5402.43	5120.53	7533.8	6957.37	7150.43	7044.06	6385.1	0.349788	0.0736338	4.75037	2.03046e-06	1.96856e-05	ENSG00000136108	CKAP2	cytoskeleton associated protein 2
283131	3981.29	2681.64	3479.43	3456.73	6013.74	5956.08	5353.87	4109.03	4378.98	0.618729	0.130287	4.74897	2.04454e-06	1.98101e-05	ENSG00000245532	NEAT1	nuclear paraspeckle assembly transcript 1
246330	197.2	216.36	195.173	199.716	291.303	271.957	315.558	317.326	250.574	0.534814	0.112709	4.74508	2.08428e-06	2.0183e-05	ENSG00000174516	PELI3	pellino E3 ubiquitin protein ligase family member 3
100506621	567.073	788.136	540.937	635.186	456.505	409.059	273.13	321.137	498.895	-0.72868	0.153624	-4.74328	2.10281e-06	2.03501e-05	NA	LINC01279	long intergenic non-protein coding RNA 1279
114794	1038	1438.16	1233.46	1127.72	1953.1	1692.42	1784.62	1595.2	1482.84	0.514016	0.108404	4.74168	2.11953e-06	2.04995e-05	ENSG00000166897	ELFN2	extracellular leucine rich repeat and fibronectin type III domain containing 2
9026	1268.56	1294.39	1232.46	1202.8	1516.14	1546.33	1613.59	1692.4	1420.83	0.341581	0.0720686	4.73966	2.14078e-06	2.06925e-05	ENSG00000130787	HIP1R	huntingtin interacting protein 1 related
51313	528.81	595.344	495.364	441.477	762.471	710.234	759.725	709.933	625.42	0.485947	0.102591	4.73673	2.17198e-06	2.09814e-05	ENSG00000164125	FAM198B	family with sequence similarity 198 member B
51111	1299.95	1265.64	1312.71	1322.93	1578.71	1571.06	1724.96	1668.58	1468.07	0.326757	0.0689996	4.73563	2.18371e-06	2.1082e-05	ENSG00000110066	KMT5B	lysine methyltransferase 5B
6653	57.8846	57.5075	81.2396	60.0649	130.011	129.236	135.239	96.2459	93.4285	0.831049	0.175496	4.73544	2.18579e-06	2.10893e-05	ENSG00000137642	SORL1	sortilin related receptor 1
26091	1042.9	938.504	968.931	997.077	1287.4	1303.59	1380.23	1184.49	1137.89	0.377731	0.0797928	4.73389	2.20253e-06	2.1238e-05	ENSG00000148634	HERC4	HECT and RLD domain containing E3 ubiquitin protein ligase 4
51203	5812.01	5763.95	5441.07	5156.57	6989.31	6782.06	9342.09	9088.09	6796.9	0.516388	0.1091	4.73318	2.21028e-06	2.12871e-05	ENSG00000137804	NUSAP1	nucleolar and spindle associated protein 1
202	114.788	308.278	152.572	207.224	78.2021	96.6458	84.8558	73.3756	139.493	-1.0165	0.214758	-4.73323	2.20979e-06	2.12871e-05	ENSG00000112297	CRYBG1	crystallin beta-gamma domain containing 1
200150	4.90548	22.1545	12.8795	19.5211	0.977527	0	0	0.95293	7.67388	-1.27644	0.269748	-4.73197	2.22352e-06	2.14017e-05	ENSG00000180287	PLD5	phospholipase D family member 5
8546	1891.55	1893.03	1847.71	1666.8	2246.36	2285.78	2619.92	2388.99	2105.02	0.375841	0.0794454	4.73081	2.23621e-06	2.15109e-05	ENSG00000132842	AP3B1	adaptor related protein complex 3 subunit beta 1
4521	631.825	430.835	694.5	588.636	1067.46	1031.64	755.747	992.953	774.199	0.669136	0.141451	4.73052	2.23941e-06	2.15288e-05	ENSG00000106268	NUDT1	nudix hydrolase 1
154881	376.741	418.108	436.911	343.872	608.999	484.353	644.374	617.498	491.357	0.54787	0.115837	4.72967	2.24883e-06	2.16063e-05	ENSG00000243335	KCTD7	potassium channel tetramerization domain containing 7
23288	384.589	486.457	487.438	411.445	644.19	593.36	666.914	627.981	537.797	0.4917	0.104037	4.7262	2.28761e-06	2.19657e-05	ENSG00000106012	IQCE	IQ motif containing E
8804	960.492	860.728	895.617	821.387	1129.04	1102.44	1400.12	1390.32	1070.02	0.486116	0.102893	4.72449	2.30695e-06	2.21381e-05	ENSG00000143162	CREG1	cellular repressor of E1A stimulated genes 1
84310	2254.56	1831.29	2271.74	2253.94	2887.61	2689.22	2962	3061.76	2526.51	0.420713	0.0890646	4.72369	2.31607e-06	2.22123e-05	ENSG00000146540	C7orf50	chromosome 7 open reading frame 50
976	977.171	1238.77	1077.91	1120.21	736.077	772.042	791.546	878.601	949.041	-0.46046	0.0974989	-4.72272	2.32708e-06	2.23046e-05	ENSG00000123146	ADGRE5	adhesion G protein-coupled receptor E5
51762	1582.51	1697.89	1484.11	1363.47	1240.48	1115.92	950.65	931.012	1295.76	-0.51242	0.108603	-4.71827	2.37857e-06	2.27844e-05	ENSG00000166128	RAB8B	RAB8B, member RAS oncogene family
375190	61.809	55.622	48.5456	60.0649	109.483	96.6458	125.958	93.3871	81.4394	0.814109	0.172551	4.71806	2.38099e-06	2.2794e-05	ENSG00000219626	FAM228B	family with sequence similarity 228 member B
118487	836.874	474.673	877.784	909.983	1474.11	1417.1	1227.76	1255.96	1059.28	0.731586	0.155077	4.71756	2.38685e-06	2.28364e-05	ENSG00000172586	CHCHD1	coiled-coil-helix-coiled-coil-helix domain containing 1
10060	165.805	184.778	193.192	129.14	100.685	96.6458	100.766	97.1988	133.526	-0.71858	0.152337	-4.71705	2.39286e-06	2.28802e-05	ENSG00000069431	ABCC9	ATP binding cassette subfamily C member 9
10456	1546.21	1314.66	1543.55	1507.63	1807.45	1917.18	2112.11	2262.25	1751.38	0.442535	0.093821	4.7168	2.39579e-06	2.28945e-05	ENSG00000143575	HAX1	HCLS1 associated protein X-1
50650	139.316	157.439	175.359	165.178	227.764	224.758	290.366	266.82	205.875	0.624101	0.132329	4.71628	2.40195e-06	2.29397e-05	ENSG00000163947	ARHGEF3	Rho guanine nucleotide exchange factor 3
7706	1657.07	1831.76	1683.25	1584.21	1287.4	1381.14	1316.59	1284.55	1503.25	-0.355067	0.0753032	-4.71516	2.41521e-06	2.30389e-05	ENSG00000121060	TRIM25	tripartite motif containing 25
101928796	37.2816	33.9389	37.6476	40.5438	18.573	5.61894	10.607	8.57637	24.0984	-1.20843	0.256281	-4.71523	2.41437e-06	2.30389e-05	NA	LOC101928796	uncharacterized LOC101928796
10098	1101.77	1200.12	1076.92	1133.72	842.628	750.69	892.312	898.613	987.097	-0.406331	0.0861958	-4.71405	2.42841e-06	2.3151e-05	ENSG00000168785	TSPAN5	tetraspanin 5
10435	294.329	320.534	243.719	283.807	214.078	179.806	149.824	158.186	230.535	-0.656316	0.139271	-4.71251	2.44688e-06	2.33131e-05	ENSG00000149798	CDC42EP2	CDC42 effector protein 2
10291	2972.72	3703.11	2999.92	3099.35	2518.11	2433	2182.39	2029.74	2742.29	-0.464883	0.0986549	-4.71221	2.45042e-06	2.33329e-05	ENSG00000099995	SF3A1	splicing factor 3a subunit 1
26191	12.7542	20.7404	21.796	16.5178	46.9213	46.0753	41.102	58.1287	33.0045	1.08911	0.231205	4.71057	2.47026e-06	2.35079e-05	ENSG00000134242	PTPN22	protein tyrosine phosphatase, non-receptor type 22
2258	0	0	1.98145	0	9.77527	14.6092	7.95523	18.1057	6.55336	1.26694	0.268974	4.71025	2.4741e-06	2.35304e-05	ENSG00000129682	FGF13	fibroblast growth factor 13
2194	4815.22	5990.68	5195.37	4805.19	4091.93	3905.16	3505.61	3049.37	4419.82	-0.497239	0.105626	-4.70755	2.50706e-06	2.38297e-05	ENSG00000169710	FASN	fatty acid synthase
8727	4077.43	3761.56	3875.72	3823.13	4613.93	4696.31	4987.93	5285.9	4390.24	0.328736	0.0698779	4.70443	2.54575e-06	2.41831e-05	ENSG00000119326	CTNNAL1	catenin alpha like 1
28981	720.124	673.592	745.027	674.228	906.167	872.06	1091.19	983.423	833.227	0.439595	0.0934599	4.70357	2.55657e-06	2.42715e-05	ENSG00000122970	IFT81	intraflagellar transport 81
8514	164.824	181.007	174.368	180.195	246.337	249.481	287.714	261.103	218.129	0.546653	0.116231	4.70318	2.56146e-06	2.43034e-05	ENSG00000069424	KCNAB2	potassium voltage-gated channel subfamily A regulatory beta subunit 2
8548	868.269	880.997	935.246	965.543	1145.66	1122.66	1205.22	1222.61	1043.28	0.359564	0.0765166	4.69917	2.61224e-06	2.47706e-05	ENSG00000117475	BLZF1	basic leucine zipper nuclear factor 1
84536	103.996	113.601	97.0913	88.5957	63.5392	47.1991	51.709	50.5053	77.0296	-0.826423	0.175967	-4.69645	2.64716e-06	2.50869e-05	ENSG00000183250	LINC01547	long intergenic non-protein coding RNA 1547
9053	136.372	164.981	137.711	139.651	80.1572	87.6555	95.4628	79.0932	115.135	-0.711734	0.151574	-4.69561	2.65808e-06	2.51754e-05	ENSG00000135525	MAP7	microtubule associated protein 7
29956	3757.6	3934.55	3702.35	3883.2	4537.68	4526.62	4928.27	5017.17	4285.93	0.310556	0.0661634	4.69377	2.68218e-06	2.53887e-05	ENSG00000143418	CERS2	ceramide synthase 2
9654	415.984	543.493	506.262	494.034	320.629	333.765	376.548	292.549	410.408	-0.546773	0.116511	-4.69287	2.69396e-06	2.54851e-05	ENSG00000135912	TTLL4	tubulin tyrosine ligase like 4
91663	5518.66	6633.16	5297.42	6393.91	4446.77	4191.73	2484.68	2736.81	4712.89	-0.718079	0.15304	-4.69209	2.70433e-06	2.55681e-05	ENSG00000179820	MYADM	myeloid associated differentiation marker
2674	18329.8	22108.3	18763.4	18782.3	15310	15144.2	11373.3	11436.1	16405.9	-0.526752	0.112271	-4.69178	2.70838e-06	2.55762e-05	ENSG00000151892	GFRA1	GDNF family receptor alpha 1
84868	212.898	206.933	156.535	226.745	86.9999	132.607	112.699	121.975	157.174	-0.747275	0.159273	-4.69179	2.7083e-06	2.55762e-05	ENSG00000135077	HAVCR2	hepatitis A virus cellular receptor 2
91373	497.415	548.207	527.067	564.61	378.303	423.668	334.12	384.984	457.297	-0.47134	0.100469	-4.69139	2.71357e-06	2.56101e-05	ENSG00000197355	UAP1L1	UDP-N-acetylglucosamine pyrophosphorylase 1 like 1
8038	2481.19	3471.19	2662.08	2480.68	4600.24	3884.94	4693.59	3604.93	3484.86	0.566021	0.120657	4.69116	2.71658e-06	2.56233e-05	ENSG00000148848	ADAM12	ADAM metallopeptidase domain 12
79632	30.414	32.0534	20.8053	45.0487	2.93258	6.74273	14.5846	3.81172	19.5491	-1.28204	0.27338	-4.6896	2.73736e-06	2.58041e-05	ENSG00000111879	FAM184A	family with sequence similarity 184 member A
122060	25.5085	29.2251	18.8238	27.0292	4.88763	7.86652	3.97762	6.67051	15.4986	-1.26535	0.26994	-4.68753	2.7652e-06	2.60512e-05	ENSG00000139737	SLAIN1	SLAIN motif family member 1
3326	40606.6	38294.8	40320.6	41811.2	32149.9	33717	28007.7	32274.8	35897.8	-0.345799	0.0737733	-4.68732	2.768e-06	2.60622e-05	ENSG00000096384	HSP90AB1	heat shock protein 90 alpha family class B member 1
91316	101.053	105.588	94.1191	84.0908	168.135	165.197	181.644	139.128	129.869	0.688951	0.147	4.68674	2.77588e-06	2.6121e-05	ENSG00000228315	GUSBP11	glucuronidase, beta pseudogene 11
90060	347.308	409.623	365.578	354.383	261.977	242.738	274.455	253.479	313.693	-0.504257	0.107609	-4.68599	2.78605e-06	2.62013e-05	ENSG00000147144	CCDC120	coiled-coil domain containing 120
55166	750.538	754.197	731.157	711.769	944.291	990.057	971.864	898.613	844.061	0.357873	0.0763814	4.68534	2.79496e-06	2.62696e-05	ENSG00000031691	CENPQ	centromere protein Q
5934	1293.08	1281.19	1225.53	1165.26	1600.21	1553.08	1742.2	1522.78	1422.92	0.359941	0.076828	4.68502	2.79933e-06	2.62953e-05	ENSG00000103479	RBL2	RB transcriptional corepressor like 2
1738	3004.11	2448.78	2879.05	2602.31	3430.14	3623.09	3542.73	3734.53	3158.09	0.382305	0.0816134	4.68434	2.80865e-06	2.63673e-05	ENSG00000091140	DLD	dihydrolipoamide dehydrogenase
8317	933.022	895.138	974.875	785.348	1116.34	1178.85	1363	1326.48	1071.63	0.456196	0.0973968	4.6839	2.81472e-06	2.64088e-05	ENSG00000097046	CDC7	cell division cycle 7
51626	274.707	226.259	275.422	274.797	399.808	333.765	462.729	402.136	331.203	0.579349	0.123705	4.68331	2.82275e-06	2.64686e-05	ENSG00000138036	DYNC2LI1	dynein cytoplasmic 2 light intermediate chain 1
3775	9.81095	12.2557	18.8238	22.5243	0	2.24758	1.32587	1.90586	8.61176	-1.2953	0.276597	-4.68297	2.82747e-06	2.64974e-05	ENSG00000135750	KCNK1	potassium two pore domain channel subfamily K member 1
221662	275.688	245.585	209.043	294.318	391.988	379.84	361.963	384.031	317.807	0.549524	0.117373	4.68185	2.843e-06	2.66273e-05	ENSG00000112183	RBM24	RNA binding motif protein 24
51122	1463.79	1398.09	1368.19	1373.98	1649.09	1835.15	1768.71	1833.44	1586.31	0.332404	0.0710103	4.68106	2.85394e-06	2.6714e-05	ENSG00000114744	COMMD2	COMM domain containing 2
23203	2013.21	1647.45	2001.27	2132.3	1433.05	1447.44	1242.34	1483.71	1675.1	-0.456901	0.0976088	-4.68094	2.8556e-06	2.6714e-05	ENSG00000165688	PMPCA	peptidase, mitochondrial processing alpha subunit
50859	79.4687	70.2346	65.388	61.5665	39.1011	13.4855	33.1468	22.8703	48.1577	-1.06434	0.22739	-4.68069	2.85907e-06	2.67309e-05	ENSG00000196104	SPOCK3	SPARC (osteonectin), cwcv and kazal like domains proteoglycan 3
84515	1075.28	1227.93	1146.27	961.038	1415.46	1459.8	1637.45	1518.02	1305.16	0.433434	0.0926107	4.68018	2.86628e-06	2.67827e-05	ENSG00000125885	MCM8	minichromosome maintenance 8 homologous recombination repair factor
84299	1121.39	751.369	1055.12	1075.16	1393.95	1472.16	1477.02	1644.76	1248.87	0.557037	0.119038	4.6795	2.87578e-06	2.68543e-05	ENSG00000141741	MIEN1	migration and invasion enhancer 1
9721	204.068	283.767	221.923	276.299	160.314	130.359	127.284	165.81	196.228	-0.694431	0.148403	-4.67935	2.87784e-06	2.68543e-05	ENSG00000204175	GPRIN2	G protein regulated inducer of neurite outgrowth 2
8641	118.713	141.412	150.591	126.136	79.1796	75.2938	87.5075	65.7521	105.573	-0.742557	0.158691	-4.67927	2.87899e-06	2.68543e-05	ENSG00000253953	PCDHGB4	protocadherin gamma subfamily B, 4
5794	97.1284	116.429	124.832	99.1071	54.7415	66.3035	41.102	63.8463	82.9362	-0.838974	0.179365	-4.67746	2.90453e-06	2.70767e-05	ENSG00000080031	PTPRH	protein tyrosine phosphatase, receptor type H
25961	79.4687	73.5342	59.4436	99.1071	124.146	162.949	135.239	139.128	109.127	0.781106	0.167037	4.67623	2.92195e-06	2.72233e-05	ENSG00000166321	NUDT13	nudix hydrolase 13
3669	32.3761	33.9389	55.4807	34.5373	7.82021	3.37136	11.9328	17.1527	24.5763	-1.24115	0.265581	-4.67332	2.96365e-06	2.75957e-05	ENSG00000172183	ISG20	interferon stimulated exonuclease gene 20
23603	11472.9	12388.6	11226.9	11831.3	9111.52	9582.54	9624.5	9938.1	10647.1	-0.29097	0.0622679	-4.67288	2.97004e-06	2.76392e-05	ENSG00000110880	CORO1C	coronin 1C
79035	1875.85	1580.04	1916.07	1809.45	2289.37	2244.2	2740.58	2967.42	2177.87	0.494009	0.105726	4.67253	2.97511e-06	2.76702e-05	ENSG00000139579	NABP2	nucleic acid binding protein 2
22861	175.616	234.273	191.21	247.768	139.786	111.255	99.4404	136.269	166.952	-0.725923	0.155367	-4.6723	2.9785e-06	2.76857e-05	ENSG00000091592	NLRP1	NLR family pyrin domain containing 1
5998	1016.41	1050.22	1126.46	1064.65	740.965	805.756	855.187	847.154	938.351	-0.38204	0.0817879	-4.67111	2.99582e-06	2.78305e-05	ENSG00000138835	RGS3	regulator of G protein signaling 3
149111	337.497	296.022	325.949	331.859	203.326	246.11	217.443	212.503	271.339	-0.526864	0.112816	-4.67013	3.01005e-06	2.79464e-05	ENSG00000143786	CNIH3	cornichon family AMPA receptor auxiliary protein 3
7275	85.3553	102.759	70.3416	111.12	155.427	156.207	177.667	154.375	126.656	0.730653	0.156499	4.66874	3.03052e-06	2.81202e-05	ENSG00000166402	TUB	tubby bipartite transcription factor
11262	9.81095	30.1679	25.7589	30.0324	1.95505	1.12379	6.62936	4.76465	13.7804	-1.29965	0.278427	-4.66784	3.04387e-06	2.82277e-05	ENSG00000079263	SP140	SP140 nuclear body protein
3185	9438.14	9316.69	9838.91	9599.87	11205.4	11424.4	11474.1	11208.4	10438.2	0.244517	0.0523866	4.66755	3.04815e-06	2.8251e-05	ENSG00000169813	HNRNPF	heterogeneous nuclear ribonucleoprotein F
9413	25.5085	34.8816	9.90727	22.5243	2.93258	0	6.62936	2.85879	13.1553	-1.2984	0.278354	-4.66456	3.09275e-06	2.86478e-05	ENSG00000135063	FAM189A2	family with sequence similarity 189 member A2
123720	479.756	462.889	496.354	450.487	376.348	334.889	259.871	271.585	391.522	-0.571532	0.122559	-4.66333	3.11137e-06	2.88036e-05	ENSG00000156232	WHAMM	WAS protein homolog associated with actin, golgi membranes and microtubules
84274	637.712	578.846	693.509	698.254	804.504	873.183	1001.03	1005.34	786.548	0.484057	0.103839	4.6616	3.13755e-06	2.90291e-05	ENSG00000110871	COQ5	coenzyme Q5, methyltransferase
5099	26.4896	66.4636	40.6198	36.0389	17.5955	5.61894	3.97762	12.3881	26.149	-1.26141	0.270658	-4.66053	3.15402e-06	2.91647e-05	ENSG00000169851	PCDH7	protocadherin 7
29922	630.844	434.135	576.603	506.047	768.336	867.564	755.747	789.979	666.157	0.544333	0.116801	4.66035	3.1567e-06	2.91726e-05	ENSG00000143156	NME7	NME/NM23 family member 7
10608	1020.34	1086.99	1040.26	1051.14	1476.07	1238.41	1453.16	1335.05	1212.68	0.380468	0.0816585	4.65926	3.17349e-06	2.93108e-05	ENSG00000123933	MXD4	MAX dimerization protein 4
5577	236.444	213.061	152.572	189.204	292.28	322.527	307.602	345.913	257.451	0.632651	0.135839	4.65738	3.20266e-06	2.95632e-05	ENSG00000005249	PRKAR2B	protein kinase cAMP-dependent type II regulatory subunit beta
1676	1034.07	1082.27	1139.34	1177.27	857.291	885.545	753.095	850.013	972.362	-0.392864	0.08439	-4.65534	3.2344e-06	2.98389e-05	ENSG00000160049	DFFA	DNA fragmentation factor subunit alpha
254295	200.143	232.387	211.025	285.308	154.449	119.122	139.217	146.751	186.05	-0.669047	0.143721	-4.65517	3.23711e-06	2.98468e-05	ENSG00000175287	PHYHD1	phytanoyl-CoA dioxygenase domain containing 1
100874366	1.96219	1.41412	0	1.50162	11.7303	14.6092	19.8881	9.5293	7.57936	1.28367	0.2759	4.65267	3.2767e-06	3.01943e-05	ENSG00000249641	HOXC13-AS	HOXC13 antisense RNA
1047	949.7	839.516	834.192	891.964	690.134	656.292	685.476	627.981	771.907	-0.391764	0.084244	-4.65035	3.31377e-06	3.05011e-05	ENSG00000153132	CLGN	calmegin
54020	102.034	145.654	120.869	99.1071	48.8763	66.3035	64.9677	64.7992	89.0763	-0.840459	0.18073	-4.65034	3.31381e-06	3.05011e-05	ENSG00000160190	SLC37A1	solute carrier family 37 member 1
80727	2587.15	3301.97	2809.7	2498.7	2088.97	2186.89	1831.03	1864.88	2396.16	-0.474663	0.102136	-4.64735	3.36234e-06	3.093e-05	ENSG00000136295	TTYH3	tweety family member 3
11154	188.37	222.96	208.053	238.758	158.359	122.493	125.958	122.928	173.485	-0.644502	0.138699	-4.64677	3.37175e-06	3.09988e-05	ENSG00000100478	AP4S1	adaptor related protein complex 4 subunit sigma 1
5606	884.948	865.441	908.497	849.918	680.358	673.149	460.078	521.252	730.455	-0.557436	0.119975	-4.64627	3.37992e-06	3.10561e-05	ENSG00000034152	MAP2K3	mitogen-activated protein kinase kinase 3
55319	1156.71	939.918	1155.19	1153.25	840.673	811.375	798.175	785.214	955.062	-0.428566	0.0922665	-4.64487	3.40296e-06	3.12498e-05	ENSG00000198498	TMA16	translation machinery associated 16 homolog
8614	5507.87	6283.88	6145.48	6845.9	4672.58	4309.73	4929.59	4907.59	5450.33	-0.387654	0.0834746	-4.64398	3.41761e-06	3.13663e-05	ENSG00000113739	STC2	stanniocalcin 2
55068	17.6597	24.04	28.7311	36.0389	6.84269	4.49515	6.62936	6.67051	16.3884	-1.25396	0.270098	-4.6426	3.4405e-06	3.15583e-05	ENSG00000120658	ENOX1	ecto-NOX disulfide-thiol exchanger 1
8520	2955.06	2405.42	2798.8	2940.18	3474.13	3697.26	3677.97	3644	3199.1	0.378261	0.0814807	4.64234	3.44486e-06	3.15802e-05	ENSG00000128708	HAT1	histone acetyltransferase 1
9050	117.731	122.086	157.526	99.1071	207.236	198.91	202.858	209.644	164.387	0.6628	0.142787	4.6419	3.45226e-06	3.16299e-05	ENSG00000152229	PSTPIP2	proline-serine-threonine phosphatase interacting protein 2
6857	56.9035	55.622	49.5364	25.5276	18.573	13.4855	18.5622	14.2939	31.563	-1.14046	0.245765	-4.64047	3.47622e-06	3.18312e-05	ENSG00000067715	SYT1	synaptotagmin 1
64084	37.2816	90.0323	43.592	67.573	9.77527	17.9806	22.5398	23.8232	39.0747	-1.18392	0.255142	-4.64023	3.48015e-06	3.1849e-05	ENSG00000158258	CLSTN2	calsyntenin 2
9459	145.202	144.24	100.063	150.162	217.988	207.901	241.309	216.315	177.898	0.660205	0.14231	4.63921	3.49735e-06	3.19881e-05	ENSG00000129675	ARHGEF6	Rac/Cdc42 guanine nucleotide exchange factor 6
28992	669.107	539.251	697.472	606.655	899.324	852.955	840.603	870.025	746.924	0.452229	0.0976062	4.6332	3.60052e-06	3.29128e-05	ENSG00000133315	MACROD1	MACRO domain containing 1
100506311	302.177	172.994	259.57	241.761	465.303	376.469	409.694	384.031	326.5	0.694009	0.149805	4.63274	3.60852e-06	3.29672e-05	ENSG00000233429	HOTAIRM1	HOXA transcript antisense RNA, myeloid-specific 1
183	49.0548	45.7232	58.4529	42.0454	84.0673	101.141	94.1369	92.4342	70.8819	0.819153	0.17685	4.63192	3.62283e-06	3.3079e-05	ENSG00000135744	AGT	angiotensinogen
79805	51.9981	51.3797	50.5271	52.5568	88.9549	97.7696	95.4628	94.34	72.8736	0.778974	0.168328	4.6277	3.6974e-06	3.37407e-05	ENSG00000143494	VASH2	vasohibin 2
112479	570.016	576.489	489.419	423.457	733.145	769.795	758.399	700.403	627.641	0.49517	0.107015	4.62712	3.70787e-06	3.38169e-05	ENSG00000196678	ERI2	ERI1 exoribonuclease family member 2
23492	112.826	131.985	121.859	117.127	192.573	183.177	196.229	185.821	155.2	0.599417	0.129562	4.62648	3.71942e-06	3.39029e-05	ENSG00000100307	CBX7	chromobox 7
93663	1319.57	1399.04	1239.4	1316.92	957.976	902.402	1092.52	1035.83	1157.96	-0.395568	0.0855272	-4.62505	3.74501e-06	3.41167e-05	ENSG00000146376	ARHGAP18	Rho GTPase activating protein 18
552889	1615.86	1834.11	1641.63	1758.4	1373.42	1390.13	1250.3	1311.23	1521.89	-0.356495	0.077081	-4.62493	3.74719e-06	3.41171e-05	ENSG00000253719	ATXN7L3B	ataxin 7 like 3B
8073	5465.68	5671.09	5224.1	5372.8	4655.96	4474.92	4148.65	4258.64	4908.98	-0.305192	0.0659903	-4.62481	3.74947e-06	3.41184e-05	ENSG00000184007	PTP4A2	protein tyrosine phosphatase type IVA, member 2
22954	758.387	906.451	826.266	864.934	610.954	620.331	596.642	669.909	731.734	-0.415087	0.0897592	-4.62446	3.7558e-06	3.41567e-05	ENSG00000119401	TRIM32	tripartite motif containing 32
6196	12.7542	41.9522	15.8516	36.0389	4.88763	1.12379	6.62936	3.81172	15.3812	-1.28741	0.278447	-4.62355	3.77232e-06	3.42874e-05	ENSG00000071242	RPS6KA2	ribosomal protein S6 kinase A2
23589	1626.66	1558.83	1816	1819.97	2172.06	2258.81	2223.49	2117.41	1949.15	0.358099	0.0774737	4.6222	3.7969e-06	3.44912e-05	ENSG00000153048	CARHSP1	calcium regulated heat stable protein 1
134145	732.878	508.612	699.453	659.212	907.145	946.23	969.212	946.259	796.125	0.517605	0.112005	4.62125	3.8143e-06	3.46296e-05	ENSG00000150756	FAM173B	family with sequence similarity 173 member B
92092	313.951	360.129	267.496	313.839	230.696	168.568	90.1593	127.693	234.066	-0.881925	0.190879	-4.62033	3.83127e-06	3.4764e-05	ENSG00000146858	ZC3HAV1L	zinc finger CCCH-type containing, antiviral 1 like
5174	94.1852	93.3319	91.1469	84.0908	126.101	171.94	153.801	161.998	122.074	0.691361	0.149646	4.61999	3.83764e-06	3.47823e-05	ENSG00000174827	PDZK1	PDZ domain containing 1
122809	1346.06	1500.38	1209.68	1282.39	1036.18	1027.14	918.829	995.811	1164.56	-0.41502	0.0898306	-4.62002	3.83695e-06	3.47823e-05	ENSG00000180008	SOCS4	suppressor of cytokine signaling 4
57409	425.795	362.957	439.883	375.406	519.067	577.627	578.08	557.464	479.535	0.46193	0.100012	4.61876	3.86048e-06	3.49695e-05	ENSG00000125457	MIF4GD	MIF4G domain containing
3978	2129.96	2660.43	2309.38	2232.91	2889.57	3007.26	3398.21	3332.39	2745.01	0.422195	0.0914529	4.61653	3.9021e-06	3.53265e-05	ENSG00000105486	LIG1	DNA ligase 1
85451	1340.18	1280.25	1212.65	1189.28	1572.84	1511.49	1732.91	1770.54	1451.27	0.381015	0.0825642	4.61477	3.93525e-06	3.56064e-05	ENSG00000132478	UNK	unkempt family zinc finger
58472	564.13	535.951	541.928	606.655	344.089	367.479	368.592	465.983	474.351	-0.512881	0.111161	-4.61387	3.95239e-06	3.57414e-05	ENSG00000137767	SQOR	sulfide quinone oxidoreductase
70	23.5463	85.7899	17.8331	94.6022	17.5955	3.37136	6.62936	5.71758	31.8857	-1.2848	0.278494	-4.61338	3.9617e-06	3.58053e-05	ENSG00000159251	ACTC1	actin, alpha, cardiac muscle 1
340348	174.635	141.412	167.433	174.188	309.876	216.891	259.871	258.244	212.819	0.635992	0.137894	4.61217	3.98489e-06	3.59945e-05	ENSG00000158457	TSPAN33	tetraspanin 33
9324	1219.5	1005.91	1111.6	1318.42	1530.81	1466.54	1841.64	1896.33	1423.84	0.513555	0.111365	4.61147	3.99828e-06	3.6095e-05	ENSG00000118418	HMGN3	high mobility group nucleosomal binding domain 3
1183	148.145	184.307	146.628	144.156	93.8425	100.017	68.9453	95.293	122.667	-0.732346	0.158836	-4.6107	4.01321e-06	3.62095e-05	ENSG00000073464	CLCN4	chloride voltage-gated channel 4
80017	311.007	293.194	307.125	316.842	130.011	185.425	192.251	231.562	245.927	-0.675981	0.146701	-4.60788	4.06803e-06	3.66833e-05	ENSG00000133943	DGLUCY	D-glutamate cyclase
596	40.2249	57.5075	61.4251	43.547	20.5281	21.352	21.214	18.1057	35.488	-1.05	0.228025	-4.60477	4.12931e-06	3.7215e-05	ENSG00000171791	BCL2	BCL2, apoptosis regulator
80169	499.378	483.629	484.466	468.506	377.325	368.602	350.03	332.572	420.564	-0.427231	0.0928011	-4.60373	4.14987e-06	3.73792e-05	ENSG00000178971	CTC1	CST telomere replication complex component 1
84340	1004.64	1030.89	1036.3	1025.61	1220.93	1274.38	1445.2	1356.02	1174.25	0.361546	0.0785408	4.60328	4.1588e-06	3.74386e-05	ENSG00000164347	GFM2	G elongation factor mitochondrial 2
23310	1234.22	1344.83	1361.26	1103.69	1605.1	1667.7	1984.83	1692.4	1499.25	0.444399	0.0965623	4.6022	4.18046e-06	3.76124e-05	ENSG00000151503	NCAPD3	non-SMC condensin II complex subunit D3
5764	397.344	405.381	422.05	426.461	666.673	496.714	681.498	559.37	506.936	0.51939	0.112876	4.60141	4.1964e-06	3.77346e-05	ENSG00000105894	PTN	pleiotrophin
2736	295.31	520.396	350.717	352.881	251.224	211.272	220.095	191.539	299.179	-0.732996	0.159323	-4.6007	4.21076e-06	3.78425e-05	ENSG00000074047	GLI2	GLI family zinc finger 2
5464	3097.32	2253.16	2879.05	2835.06	3674.52	3669.17	3883.48	4496.87	3348.58	0.4891	0.106344	4.59925	4.24021e-06	3.80857e-05	ENSG00000180817	PPA1	pyrophosphatase (inorganic) 1
9404	154.032	175.351	213.006	166.68	118.281	113.503	79.5523	93.3871	139.224	-0.732452	0.159279	-4.59856	4.25431e-06	3.81909e-05	ENSG00000110031	LPXN	leupaxin
5218	599.449	585.446	549.854	471.509	420.336	388.831	397.762	353.537	470.84	-0.487286	0.105974	-4.59815	4.2625e-06	3.8243e-05	ENSG00000058091	CDK14	cyclin dependent kinase 14
25963	1685.52	1543.28	1644.61	1588.72	1975.58	1981.24	2014	1993.53	1803.31	0.298146	0.0648501	4.59747	4.27655e-06	3.83475e-05	ENSG00000103978	TMEM87A	transmembrane protein 87A
79080	803.517	864.027	858.96	882.954	639.302	620.331	620.508	708.027	749.703	-0.386121	0.0839942	-4.59699	4.28638e-06	3.83987e-05	ENSG00000110104	CCDC86	coiled-coil domain containing 86
6608	491.529	551.035	484.466	489.529	640.28	666.406	730.555	689.921	592.965	0.416908	0.0906922	4.59696	4.28706e-06	3.83987e-05	ENSG00000128602	SMO	smoothened, frizzled class receptor
9477	617.109	559.52	558.77	611.16	716.527	821.489	779.613	789.979	681.771	0.398141	0.0866829	4.59307	4.36774e-06	3.90994e-05	ENSG00000124641	MED20	mediator complex subunit 20
196740	524.886	491.642	476.54	418.953	716.527	703.491	669.565	592.722	574.291	0.46613	0.101585	4.58856	4.46304e-06	3.99303e-05	ENSG00000165633	VSTM4	V-set and transmembrane domain containing 4
11336	1294.06	1254.32	1332.53	1226.83	1690.14	1568.81	1573.81	1567.57	1438.51	0.320149	0.0698046	4.58636	4.51048e-06	4.03321e-05	ENSG00000180104	EXOC3	exocyst complex component 3
57452	6.86767	2.82824	9.90727	9.00973	32.2584	28.0947	31.8209	20.9644	17.7189	1.24258	0.270969	4.58568	4.52512e-06	4.04404e-05	ENSG00000100626	GALNT16	polypeptide N-acetylgalactosaminyltransferase 16
117178	948.719	966.787	990.727	900.973	1153.48	1212.57	1268.86	1209.27	1081.42	0.338139	0.073742	4.58544	4.53031e-06	4.04642e-05	ENSG00000117155	SSX2IP	SSX family member 2 interacting protein
6237	1275.42	1233.58	1359.28	1536.16	1846.55	1622.75	1968.92	1898.24	1592.61	0.431094	0.0940282	4.58473	4.54565e-06	4.05785e-05	ENSG00000126458	RRAS	RAS related
9049	1448.1	1119.98	1527.7	1542.17	2073.33	2044.17	1836.33	1994.48	1698.28	0.480921	0.104913	4.58399	4.56196e-06	4.07014e-05	ENSG00000110711	AIP	aryl hydrocarbon receptor interacting protein
64417	552.357	464.774	529.048	474.513	772.246	661.911	700.06	654.663	601.196	0.451213	0.0984424	4.58353	4.57197e-06	4.0768e-05	ENSG00000151881	TMEM267	transmembrane protein 267
114327	514.094	400.196	445.827	415.949	686.224	574.256	757.073	601.299	549.365	0.534352	0.11661	4.5824	4.59668e-06	4.09421e-05	ENSG00000096093	EFHC1	EF-hand domain containing 1
22885	2930.53	3245.4	3083.14	2731.45	3570.9	3838.86	4584.87	4443.51	3553.58	0.439866	0.0959915	4.58235	4.59784e-06	4.09421e-05	ENSG00000173210	ABLIM3	actin binding LIM protein family member 3
55274	829.026	742.413	737.101	725.284	908.122	1047.37	1016.94	1060.61	883.359	0.399514	0.0871867	4.58229	4.59917e-06	4.09421e-05	ENSG00000130024	PHF10	PHD finger protein 10
83986	1644.32	1773.78	1657.49	1645.78	1343.12	1366.53	1341.78	1374.12	1518.36	-0.306282	0.0668505	-4.5816	4.61441e-06	4.10549e-05	ENSG00000167930	FAM234A	family with sequence similarity 234 member A
8189	2146.64	2332.83	2189.51	2255.44	1876.85	1827.28	1730.26	1680.01	2004.85	-0.322188	0.0703372	-4.58061	4.63611e-06	4.12251e-05	ENSG00000125755	SYMPK	symplekin
23466	2005.36	2237.61	2208.33	2136.81	1734.13	1572.18	1132.29	1108.26	1766.87	-0.594036	0.129769	-4.57762	4.7029e-06	4.17957e-05	ENSG00000183741	CBX6	chromobox 6
84080	278.631	280.938	310.098	330.357	436.954	374.221	483.943	433.583	366.091	0.510415	0.111542	4.57597	4.7402e-06	4.21038e-05	ENSG00000124074	ENKD1	enkurin domain containing 1
64855	7168.86	6973.02	6983.63	7443.54	6030.36	6112.28	5701.25	5674.7	6510.96	-0.276767	0.0605014	-4.57456	4.7723e-06	4.23228e-05	ENSG00000136830	FAM129B	family with sequence similarity 129 member B
7316	14757.6	13917.3	14356.6	15157.4	16853.5	17919.9	20795	20569.9	16790.9	0.379184	0.0828893	4.57458	4.77166e-06	4.23228e-05	ENSG00000150991	UBC	ubiquitin C
23368	359.081	452.518	341.801	348.376	235.584	238.243	278.433	246.809	312.606	-0.56832	0.124236	-4.57453	4.77279e-06	4.23228e-05	ENSG00000088808	PPP1R13B	protein phosphatase 1 regulatory subunit 13B
11214	1135.13	1747.85	1314.69	1166.76	935.493	795.642	930.762	657.521	1085.48	-0.64769	0.141613	-4.57367	4.79249e-06	4.24739e-05	ENSG00000170776	AKAP13	A-kinase anchoring protein 13
54461	1959.25	2114.58	2038.92	2072.24	1743.91	1583.42	1614.91	1630.46	1844.71	-0.311627	0.0681449	-4.57301	4.80762e-06	4.25845e-05	ENSG00000159069	FBXW5	F-box and WD repeat domain containing 5
84002	520.962	526.053	451.772	448.985	345.067	328.146	336.771	379.266	417.128	-0.47379	0.10367	-4.57017	4.87321e-06	4.31415e-05	ENSG00000176597	B3GNT5	UDP-GlcNAc:betaGal beta-1,3-N-acetylglucosaminyltransferase 5
7482	275.688	402.081	310.098	255.276	167.157	191.044	209.488	187.727	249.82	-0.677351	0.148261	-4.56863	4.90916e-06	4.34357e-05	ENSG00000134245	WNT2B	Wnt family member 2B
51622	534.697	411.509	549.854	451.988	758.561	672.025	701.386	666.098	593.265	0.504036	0.110337	4.56817	4.92004e-06	4.35079e-05	ENSG00000122674	CCZ1	CCZ1 homolog, vacuolar protein trafficking and biogenesis associated
11339	515.075	386.055	481.493	500.04	769.313	651.797	636.419	663.239	575.429	0.516376	0.113064	4.56711	4.94498e-06	4.37043e-05	ENSG00000104147	OIP5	Opa interacting protein 5
164312	3028.64	4339.93	3604.26	2932.67	2080.18	2457.72	2503.25	2346.11	2911.6	-0.541577	0.118609	-4.56606	4.96977e-06	4.38992e-05	ENSG00000125872	LRRN4	leucine rich repeat neuronal 4
124936	532.735	434.135	506.262	518.06	671.561	646.178	672.217	728.038	588.648	0.442163	0.0968737	4.56432	5.01105e-06	4.42394e-05	ENSG00000167740	CYB5D2	cytochrome b5 domain containing 2
7408	6097.51	6971.14	5508.44	6943.5	4907.18	4705.3	4534.48	5005.74	5584.16	-0.403235	0.0883678	-4.56315	5.03929e-06	4.44642e-05	ENSG00000125753	VASP	vasodilator stimulated phosphoprotein
8994	477.793	489.285	445.827	438.474	359.73	334.889	246.612	238.232	378.855	-0.610914	0.1339	-4.56246	5.05567e-06	4.45841e-05	ENSG00000144791	LIMD1	LIM domains containing 1
23184	1808.16	1864.28	1962.63	2277.96	1500.5	1415.97	1405.42	1575.19	1726.27	-0.409851	0.0898442	-4.5618	5.07177e-06	4.47015e-05	ENSG00000117899	MESD	mesoderm development LRP chaperone
636	448.361	524.638	473.568	409.943	340.179	248.357	335.446	315.42	386.989	-0.559152	0.122679	-4.55787	5.16754e-06	4.55205e-05	ENSG00000151746	BICD1	BICD cargo adaptor 1
4520	598.468	675.478	526.076	536.079	409.584	439.401	416.324	358.302	494.964	-0.510166	0.111942	-4.5574	5.17898e-06	4.55961e-05	ENSG00000188786	MTF1	metal regulatory transcription factor 1
373156	1008.57	841.873	943.172	1006.09	1222.89	1177.73	1336.48	1451.31	1123.51	0.439135	0.0964297	4.55394	5.26502e-06	4.63281e-05	ENSG00000197448	GSTK1	glutathione S-transferase kappa 1
9564	3110.07	3729.51	3458.63	3536.32	2706.77	2742.04	2695.5	2781.6	3095.05	-0.334939	0.0735547	-4.5536	5.27345e-06	4.63768e-05	ENSG00000050820	BCAR1	BCAR1, Cas family scaffold protein
6778	2626.39	2751.41	2755.21	2653.37	1910.09	2012.7	2273.87	2227	2401.25	-0.35069	0.0770616	-4.55077	5.34495e-06	4.69798e-05	ENSG00000166888	STAT6	signal transducer and activator of transcription 6
51507	3906.72	3200.62	3969.84	3796.1	4499.55	4825.55	5412.21	5604.18	4401.85	0.438477	0.0963723	4.54982	5.36907e-06	4.71659e-05	ENSG00000022277	RTF2	replication termination factor 2
8504	553.338	477.03	543.909	558.603	678.403	685.511	751.769	822.378	633.868	0.452244	0.0994067	4.54943	5.37919e-06	4.72288e-05	ENSG00000034693	PEX3	peroxisomal biogenesis factor 3
5524	4012.68	3688.02	4303.72	3998.82	5042.08	5103.12	4969.37	4815.15	4491.62	0.3124	0.0686744	4.54901	5.38999e-06	4.72977e-05	ENSG00000119383	PTPA	protein phosphatase 2 phosphatase activator
7594	29.4329	40.5381	14.8609	24.026	75.2695	69.6749	66.2936	66.7051	48.3501	1.03088	0.226626	4.5488	5.39515e-06	4.7317e-05	ENSG00000198521	ZNF43	zinc finger protein 43
80351	2278.1	2452.56	2364.87	2156.33	2817.23	3080.3	3366.39	2824.48	2667.53	0.374957	0.0824333	4.54861	5.40025e-06	4.73358e-05	ENSG00000107854	TNKS2	tankyrase 2
7536	4688.65	5296.82	4713.88	4528.89	3836.79	3827.62	2890.4	2895	4084.76	-0.495386	0.108914	-4.5484	5.40545e-06	4.73554e-05	ENSG00000168066	SF1	splicing factor 1
55855	100.072	68.3491	86.1933	70.5762	124.146	164.073	141.868	145.798	112.634	0.748173	0.164567	4.54631	5.45954e-06	4.78031e-05	NA	FAM45BP	family with sequence similarity 45, member A pseudogene
58488	615.147	524.638	561.742	578.125	706.752	739.453	798.175	831.907	669.492	0.423181	0.0930913	4.54587	5.47097e-06	4.78508e-05	ENSG00000141179	PCTP	phosphatidylcholine transfer protein
64429	953.625	913.521	917.413	943.019	1162.28	1109.18	1381.56	1355.07	1091.96	0.414439	0.0911673	4.54592	5.46961e-06	4.78508e-05	ENSG00000023041	ZDHHC6	zinc finger DHHC-type containing 6
2770	822.158	695.747	734.129	687.743	991.212	965.334	951.976	952.93	850.153	0.384342	0.0845739	4.54445	5.50791e-06	4.81476e-05	ENSG00000127955	GNAI1	G protein subunit alpha i1
5529	1406.89	1596.54	1522.75	1360.47	1169.12	1181.1	967.886	1058.7	1282.93	-0.416972	0.0917734	-4.5435	5.53283e-06	4.83126e-05	ENSG00000154001	PPP2R5E	protein phosphatase 2 regulatory subunit B'epsilon
51248	986.001	737.228	992.708	1018.1	1239.5	1254.15	1434.59	1464.65	1140.87	0.511801	0.112642	4.54361	5.53e-06	4.83126e-05	ENSG00000120509	PDZD11	PDZ domain containing 11
200197	26.4896	18.3836	11.8887	19.5211	2.93258	3.37136	2.65174	3.81172	11.1313	-1.2628	0.277987	-4.54266	5.55475e-06	4.84776e-05	ENSG00000175147	TMEM51-AS1	TMEM51 antisense RNA 1
858	3595.71	3435.37	3159.43	3704.5	4335.33	4385.02	4261.35	4919.98	3974.59	0.358921	0.079022	4.54204	5.57129e-06	4.85689e-05	ENSG00000105971	CAV2	caveolin 2
56892	17.6597	18.3836	14.8609	19.5211	0.977527	1.12379	6.62936	1.90586	10.1327	-1.26494	0.278492	-4.54209	5.56984e-06	4.85689e-05	ENSG00000176907	TCIM	transcriptional and immune response regulator
7296	11622.1	12601.2	11920.4	11960.4	9285.52	9800.56	10270.2	10108.7	10946.1	-0.28232	0.0621654	-4.54143	5.58738e-06	4.86826e-05	ENSG00000198431	TXNRD1	thioredoxin reductase 1
978	202.106	205.047	211.025	210.227	131.966	155.083	128.61	126.74	171.35	-0.57677	0.127062	-4.53929	5.64428e-06	4.91517e-05	ENSG00000158825	CDA	cytidine deaminase
261726	1807.18	1669.13	1671.36	1750.89	2019.57	2153.18	2224.81	2335.63	1953.97	0.334967	0.073817	4.5378	5.6844e-06	4.9467e-05	ENSG00000143155	TIPRL	TOR signaling pathway regulator
79883	39.2438	48.0801	31.7033	58.5633	88.9549	83.1603	95.4628	84.8107	66.2474	0.863285	0.190247	4.53772	5.68668e-06	4.9467e-05	ENSG00000132000	PODNL1	podocan like 1
8303	719.143	752.783	809.424	731.29	1046.93	1033.88	1062.02	883.366	879.856	0.405458	0.0893635	4.53718	5.70114e-06	4.95658e-05	ENSG00000184602	SNN	stannin
119032	349.27	197.505	258.58	312.337	569.898	501.209	446.819	400.23	379.481	0.718723	0.158429	4.53655	5.71823e-06	4.96874e-05	ENSG00000166275	BORCS7	BLOC-1 related complex subunit 7
5525	688.729	656.623	726.203	738.798	847.515	899.03	1002.36	1016.78	822.004	0.413486	0.0911762	4.53502	5.7599e-06	5.00223e-05	ENSG00000066027	PPP2R5A	protein phosphatase 2 regulatory subunit B'alpha
2316	64849.4	104554	70340.6	76959.6	55262.5	53444	53729.6	46147.5	65660.9	-0.570113	0.125725	-4.5346	5.77136e-06	5.00946e-05	ENSG00000196924	FLNA	filamin A
6838	1768.91	1537.62	1631.73	1648.78	1361.69	1275.5	1233.06	1289.31	1468.33	-0.343554	0.0758042	-4.53213	5.83928e-06	5.06292e-05	ENSG00000148296	SURF6	surfeit 6
6307	1445.15	1675.26	1276.06	1758.4	1134.91	1057.48	1100.47	1108.26	1319.5	-0.466088	0.102841	-4.53214	5.83903e-06	5.06292e-05	ENSG00000052802	MSMO1	methylsterol monooxygenase 1
647024	369.873	496.827	372.513	384.415	261.977	267.462	294.344	262.056	338.683	-0.560311	0.123684	-4.53019	5.89301e-06	5.10674e-05	ENSG00000188112	C6orf132	chromosome 6 open reading frame 132
150776	527.829	617.97	569.668	594.642	410.561	437.154	445.493	424.054	503.421	-0.419011	0.09251	-4.52936	5.91634e-06	5.12418e-05	ENSG00000152117	LOC150776	sphingomyelin phosphodiesterase 4, neutral membrane (neutral sphingomyelinase-3) pseudogene
161823	382.627	355.887	361.615	372.402	485.831	468.62	507.809	506.006	430.1	0.409776	0.0904761	4.52911	5.92332e-06	5.12745e-05	ENSG00000168803	ADAL	adenosine deaminase like
103	4663.15	5905.84	4701.99	4491.35	3752.72	3799.53	3384.95	2920.73	4202.53	-0.492606	0.108844	-4.52579	6.01717e-06	5.20587e-05	ENSG00000160710	ADAR	adenosine deaminase, RNA specific
83479	303.158	270.568	277.404	297.321	407.629	349.498	446.819	445.971	349.796	0.504969	0.111596	4.52497	6.04045e-06	5.22319e-05	ENSG00000118197	DDX59	DEAD-box helicase 59
26061	963.436	800.863	837.164	968.546	1223.86	1174.36	1189.31	1138.75	1037.04	0.399066	0.0882048	4.52431	6.05931e-06	5.23667e-05	ENSG00000131373	HACL1	2-hydroxyacyl-CoA lyase 1
347404	25.5085	34.4102	19.8145	19.5211	6.84269	3.37136	2.65174	8.57637	15.0871	-1.24088	0.274325	-4.5234	6.08538e-06	5.25636e-05	ENSG00000147036	LANCL3	LanC like 3
199704	109.883	100.874	119.878	94.6022	183.775	175.311	181.644	148.657	139.328	0.643973	0.142381	4.52289	6.09998e-06	5.26613e-05	ENSG00000196967	ZNF585A	zinc finger protein 585A
28998	1342.14	991.298	1286.95	1304.91	1632.47	1700.29	1723.63	1744.81	1465.81	0.45351	0.100275	4.52265	6.10701e-06	5.26935e-05	ENSG00000172172	MRPL13	mitochondrial ribosomal protein L13
55055	2052.45	1934.99	1885.35	1920.57	2332.38	2323.99	2523.13	2500.49	2184.17	0.307622	0.0680205	4.52249	6.11159e-06	5.27046e-05	ENSG00000174442	ZWILCH	zwilch kinetochore protein
1906	776.046	1160.52	777.721	1321.43	652.988	628.198	546.259	583.193	805.794	-0.682501	0.150954	-4.52125	6.14753e-06	5.2986e-05	ENSG00000078401	EDN1	endothelin 1
3199	67.6956	52.7938	49.5364	63.0681	109.483	122.493	95.4628	97.1988	82.2164	0.784276	0.17348	4.52085	6.15905e-06	5.30567e-05	ENSG00000105996	HOXA2	homeobox A2
4857	17.6597	37.2385	21.796	37.5406	5.86516	6.74273	10.607	3.81172	17.6577	-1.23222	0.272614	-4.52001	6.18361e-06	5.32396e-05	ENSG00000139910	NOVA1	NOVA alternative splicing regulator 1
92154	1294.06	1428.73	1284.97	1249.35	1690.14	1659.83	1612.26	1692.4	1488.97	0.330988	0.0732346	4.51955	6.19702e-06	5.33264e-05	ENSG00000132613	MTSS1L	MTSS1L, I-BAR domain containing
4713	1930.8	1695.06	2214.27	2270.45	2798.66	2513.91	3033.59	3036.99	2436.72	0.473225	0.104752	4.51758	6.25492e-06	5.37957e-05	ENSG00000099795	NDUFB7	NADH:ubiquinone oxidoreductase subunit B7
51319	754.462	831.974	755.925	656.209	1006.85	1075.47	955.954	1002.48	879.915	0.412333	0.0912756	4.51745	6.25874e-06	5.37996e-05	ENSG00000174891	RSRC1	arginine and serine rich coiled-coil 1
92935	306.102	264.44	207.062	255.276	165.202	184.301	136.565	146.751	208.212	-0.654697	0.144958	-4.51645	6.28846e-06	5.4026e-05	ENSG00000247626	MARS2	methionyl-tRNA synthetase 2, mitochondrial
79786	862.383	1023.35	803.48	926.501	707.729	685.511	578.08	583.193	771.278	-0.483115	0.106983	-4.5158	6.3079e-06	5.41639e-05	ENSG00000135686	KLHL36	kelch like family member 36
2526	431.682	471.845	372.513	464.001	305.966	329.27	287.714	292.549	369.443	-0.49723	0.110184	-4.51273	6.39988e-06	5.49243e-05	ENSG00000196371	FUT4	fucosyltransferase 4
93649	8.82986	44.3091	2.97218	25.5276	0	1.12379	0	0	10.3453	-1.17288	0.260024	-4.51065	6.46278e-06	5.54344e-05	ENSG00000141052	MYOCD	myocardin
60485	1067.43	1033.72	918.404	1060.15	750.74	697.872	829.996	788.073	893.298	-0.401287	0.0890198	-4.50784	6.54919e-06	5.61455e-05	ENSG00000151748	SAV1	salvador family WW domain containing protein 1
84883	717.181	612.785	766.823	767.329	1057.68	937.239	908.222	1023.45	848.839	0.446915	0.099153	4.50732	6.56507e-06	5.62514e-05	ENSG00000042286	AIFM2	apoptosis inducing factor, mitochondria associated 2
23621	1077.24	1401.86	1120.51	1220.82	1625.63	1595.78	1732.91	1591.39	1420.77	0.425339	0.0944325	4.50416	6.66369e-06	5.70216e-05	ENSG00000186318	BACE1	beta-secretase 1
6002	1196.94	1211.9	1237.42	1142.73	1577.73	1463.17	1507.52	1445.59	1347.87	0.316896	0.0703573	4.50409	6.66565e-06	5.70216e-05	ENSG00000159788	RGS12	regulator of G protein signaling 12
2202	3950.87	4866.93	3786.56	5170.09	2895.43	2733.05	3410.14	3282.84	3761.99	-0.506117	0.112365	-4.50423	6.66149e-06	5.70216e-05	ENSG00000115380	EFEMP1	EGF containing fibulin extracellular matrix protein 1
613	738.765	965.372	744.036	779.342	523.954	529.304	643.048	545.076	683.612	-0.509315	0.113098	-4.5033	6.69072e-06	5.72055e-05	ENSG00000186716	BCR	BCR, RhoGEF and GTPase activating protein
23612	558.243	485.986	617.223	542.086	712.617	739.453	816.737	748.05	652.549	0.441255	0.0979885	4.50313	6.69606e-06	5.72206e-05	ENSG00000174307	PHLDA3	pleckstrin homology like domain family A member 3
137075	91.2419	113.601	116.906	93.1006	49.8539	44.9515	57.0125	67.658	79.2906	-0.814232	0.180884	-4.50141	6.75045e-06	5.76546e-05	ENSG00000253958	CLDN23	claudin 23
84752	28.4518	75.8911	29.7218	70.5762	12.7078	21.352	10.607	11.4352	32.5929	-1.19657	0.265844	-4.50103	6.76262e-06	5.77276e-05	ENSG00000237172	B3GNT9	UDP-GlcNAc:betaGal beta-1,3-N-acetylglucosaminyltransferase 9
54507	75.5443	70.706	75.2953	69.0746	125.123	135.978	111.373	118.163	97.6573	0.693444	0.154072	4.50077	6.77078e-06	5.77665e-05	ENSG00000143382	ADAMTSL4	ADAMTS like 4
965	528.81	403.024	481.493	492.532	616.819	642.807	743.814	698.497	575.975	0.488417	0.108538	4.49995	6.79684e-06	5.79579e-05	ENSG00000116815	CD58	CD58 molecule
2959	541.565	414.337	518.15	543.587	701.864	722.596	660.284	747.097	606.185	0.479236	0.10651	4.49945	6.81295e-06	5.80644e-05	ENSG00000137947	GTF2B	general transcription factor IIB
5971	951.663	880.054	831.22	888.96	628.55	692.253	639.07	726.132	779.738	-0.391837	0.0871019	-4.49861	6.84004e-06	5.82642e-05	ENSG00000104856	RELB	RELB proto-oncogene, NF-kB subunit
8417	1430.44	1444.76	1444.48	1474.59	1695.03	1789.07	2053.78	1904.91	1654.63	0.353364	0.0785601	4.49801	6.85921e-06	5.83771e-05	ENSG00000079950	STX7	syntaxin 7
24139	363.986	312.52	375.486	393.425	252.202	252.852	257.219	233.468	305.145	-0.506921	0.1127	-4.49797	6.8606e-06	5.83771e-05	ENSG00000125746	EML2	echinoderm microtubule associated protein like 2
6621	819.215	899.38	757.906	800.365	527.864	561.894	680.172	602.251	706.131	-0.455138	0.101208	-4.49703	6.89079e-06	5.86029e-05	ENSG00000165684	SNAPC4	small nuclear RNA activating complex polypeptide 4
1601	1630.58	2122.12	1686.22	1716.35	2473.14	2270.05	2682.24	2407.1	2123.48	0.441231	0.0981223	4.49675	6.90012e-06	5.8651e-05	ENSG00000153071	DAB2	DAB2, clathrin adaptor protein
51734	857.477	872.983	835.183	1033.12	1124.16	1214.81	1197.26	1207.36	1042.79	0.392563	0.087315	4.49594	6.92623e-06	5.88417e-05	ENSG00000198736	MSRB1	methionine sulfoxide reductase B1
1649	310.026	275.753	317.033	337.865	438.909	452.887	397.762	432.63	370.358	0.467646	0.104039	4.4949	6.9602e-06	5.90989e-05	ENSG00000175197	DDIT3	DNA damage inducible transcript 3
1573	7.84876	16.9694	9.90727	7.50811	0	0	0	0	5.2792	-1.17283	0.260968	-4.49416	6.98439e-06	5.92728e-05	ENSG00000134716	CYP2J2	cytochrome P450 family 2 subfamily J member 2
1000	9174.22	10779.8	8811.53	9382.14	7529.89	7414.75	7614.48	7449.05	8519.49	-0.340238	0.0757613	-4.49093	7.09145e-06	6.01494e-05	ENSG00000170558	CDH2	cadherin 2
794	13.7353	37.2385	15.8516	39.0422	7.82021	4.49515	3.97762	1.90586	15.5083	-1.24909	0.278188	-4.49009	7.11929e-06	6.03536e-05	ENSG00000172137	CALB2	calbindin 2
80313	74.5632	80.1335	96.1005	72.0779	182.797	119.122	124.632	158.186	113.452	0.767593	0.170986	4.4892	7.14904e-06	6.05738e-05	ENSG00000148814	LRRC27	leucine rich repeat containing 27
832	6757.79	6384.75	6895.46	7384.98	5721.46	5567.25	5019.75	5435.51	6145.87	-0.327888	0.0730707	-4.48727	7.2142e-06	6.10935e-05	ENSG00000077549	CAPZB	capping actin protein of muscle Z-line subunit beta
3382	28.4518	26.8683	21.796	30.0324	3.91011	4.49515	13.2587	5.71758	16.8163	-1.21205	0.270157	-4.48647	7.24144e-06	6.12917e-05	ENSG00000003147	ICA1	islet cell autoantigen 1
23332	1198.9	1531.49	1164.1	1040.62	848.493	816.994	938.717	770.92	1038.78	-0.527477	0.117657	-4.48319	7.35344e-06	6.22068e-05	ENSG00000074054	CLASP1	cytoplasmic linker associated protein 1
9349	24590.2	17568.6	28137.6	24859.4	33450	36079.2	34097.4	35235.5	29252.2	0.520598	0.116168	4.48141	7.41498e-06	6.26942e-05	ENSG00000125691	RPL23	ribosomal protein L23
8536	517.037	433.663	444.836	486.526	582.606	634.94	696.083	790.932	573.328	0.504079	0.11256	4.4783	7.52414e-06	6.35836e-05	ENSG00000134072	CAMK1	calcium/calmodulin dependent protein kinase I
22913	5556.92	4898.51	5354.88	5125.04	6485.89	6208.93	7244.56	7998.89	6109.2	0.405228	0.0904975	4.47778	7.54216e-06	6.37022e-05	ENSG00000125970	RALY	RALY heterogeneous nuclear ribonucleoprotein
220988	13962.9	13033.9	14040.6	14399.1	11560.2	11672.8	9811.45	10050.5	12316.4	-0.355482	0.0793961	-4.47733	7.55822e-06	6.37705e-05	ENSG00000170144	HNRNPA3	heterogeneous nuclear ribonucleoprotein A3
22982	660.277	777.294	637.037	651.704	959.931	919.259	995.73	849.06	806.287	0.429856	0.0960064	4.47736	7.55703e-06	6.37705e-05	ENSG00000151240	DIP2C	disco interacting protein 2 homolog C
1173	11517.1	10736.5	12118.6	12257.7	14171.2	13978.8	14338	14708.5	12978.3	0.291108	0.065039	4.4759	7.60906e-06	6.41656e-05	ENSG00000161203	AP2M1	adaptor related protein complex 2 subunit mu 1
54585	672.05	635.883	637.037	563.108	768.336	816.994	885.682	904.33	735.428	0.412325	0.092173	4.47338	7.69942e-06	6.48933e-05	ENSG00000163818	LZTFL1	leucine zipper transcription factor like 1
55684	4589.56	4898.98	4355.24	4603.97	3888.6	3706.25	3788.02	3727.86	4194.81	-0.284689	0.0636619	-4.4719	7.75287e-06	6.53094e-05	ENSG00000196642	RABL6	RAB, member RAS oncogene family like 6
7353	1951.4	1597.01	1982.44	2150.32	2586.54	2468.96	2561.58	2912.15	2276.3	0.443049	0.0991204	4.46981	7.82902e-06	6.58816e-05	ENSG00000070010	UFD1	ubiquitin recognition factor in ER associated degradation 1
83692	1345.08	1497.08	1336.49	1351.46	1690.14	1674.44	1966.27	1913.48	1596.81	0.377935	0.0845512	4.4699	7.82571e-06	6.58816e-05	ENSG00000102181	CD99L2	CD99 molecule like 2
51776	1621.75	2103.27	1484.11	1614.24	1164.23	1168.74	1328.52	1078.72	1445.45	-0.506028	0.113216	-4.4696	7.8366e-06	6.59107e-05	ENSG00000091436	MAP3K20	mitogen-activated protein kinase kinase kinase 20
8638	43.1682	31.582	67.3694	46.5503	6.84269	10.1141	19.8881	20.0115	30.6908	-1.16081	0.25972	-4.46944	7.84232e-06	6.59242e-05	ENSG00000135114	OASL	2'-5'-oligoadenylate synthetase like
7019	2593.04	2348.38	2515.46	2292.98	3076.28	3301.69	2939.46	2978.86	2755.77	0.328637	0.073534	4.46918	7.85201e-06	6.59709e-05	ENSG00000108064	TFAM	transcription factor A, mitochondrial
55701	1911.17	2237.14	1996.31	2084.25	1464.33	1371.02	1717	1613.31	1799.32	-0.406419	0.0909561	-4.4683	7.88448e-06	6.62089e-05	ENSG00000165801	ARHGEF40	Rho guanine nucleotide exchange factor 40
11096	8111.7	8224.52	7598.88	6890.94	6062.62	6352.77	4885.84	4941.89	6633.65	-0.454777	0.101788	-4.4679	7.89913e-06	6.62971e-05	ENSG00000154736	ADAMTS5	ADAM metallopeptidase with thrombospondin type 1 motif 5
1316	4430.63	4475.69	4038.2	4519.88	3501.5	3586.01	2682.24	2793.04	3753.4	-0.458237	0.102609	-4.46584	7.97538e-06	6.6902e-05	ENSG00000067082	KLF6	Kruppel like factor 6
10403	2141.73	1925.56	2068.64	2075.24	2478.03	2456.6	2749.86	2593.87	2311.19	0.31934	0.0715524	4.46302	8.08124e-06	6.77545e-05	ENSG00000080986	NDC80	NDC80, kinetochore complex component
23580	1101.77	1139.78	1063.05	1081.17	840.673	909.145	884.357	849.06	983.625	-0.329155	0.0737557	-4.46277	8.09064e-06	6.77978e-05	ENSG00000179604	CDC42EP4	CDC42 effector protein 4
221710	1101.77	1112.44	1009.55	1148.74	862.178	894.535	731.881	809.99	958.886	-0.394169	0.0883293	-4.4625	8.10103e-06	6.78493e-05	ENSG00000224531	SMIM13	small integral membrane protein 13
22836	3313.16	3446.68	3051.44	2931.17	4054.78	3995.07	3891.43	4079.49	3595.4	0.323029	0.0724052	4.4614	8.14246e-06	6.81606e-05	ENSG00000164292	RHOBTB3	Rho related BTB domain containing 3
5111	9941.44	7399.62	9489.18	9529.3	12094	11881.8	12020.4	13265.7	10702.7	0.425425	0.0954095	4.45893	8.23688e-06	6.89149e-05	ENSG00000132646	PCNA	proliferating cell nuclear antigen
16	4089.21	4292.8	4172.94	4102.43	4914.03	4869.37	5117.87	4969.53	4566.02	0.251033	0.0563112	4.45796	8.27425e-06	6.91914e-05	ENSG00000090861	AARS	alanyl-tRNA synthetase
1627	6526.25	7401.5	7042.09	7093.66	5806.51	5632.43	5698.6	5886.25	6385.91	-0.28202	0.0632764	-4.45696	8.31308e-06	6.94798e-05	ENSG00000113758	DBN1	drebrin 1
401089	36.3005	76.8338	32.694	34.5373	15.6404	15.733	5.30349	14.2939	28.9171	-1.18137	0.265132	-4.45579	8.35864e-06	6.98241e-05	ENSG00000206262	FOXL2NB	FOXL2 neighbor
7327	1847.4	2021.72	1783.31	2046.71	1457.49	1537.34	1496.91	1574.24	1720.64	-0.337223	0.0756886	-4.4554	8.37361e-06	6.99127e-05	ENSG00000184787	UBE2G2	ubiquitin conjugating enzyme E2 G2
2009	153.051	205.99	166.442	175.69	261.977	310.165	273.13	246.809	224.157	0.589495	0.132355	4.45389	8.4329e-06	7.03709e-05	ENSG00000066629	EML1	echinoderm microtubule associated protein like 1
6781	322.78	397.839	281.366	286.81	194.528	185.425	238.657	203.927	263.917	-0.617259	0.138712	-4.44994	8.58925e-06	7.16383e-05	ENSG00000159167	STC1	stanniocalcin 1
158158	456.209	437.434	450.781	363.393	256.112	284.318	306.276	330.667	360.649	-0.517451	0.116337	-4.44788	8.67218e-06	7.22923e-05	ENSG00000165105	RASEF	RAS and EF-hand domain containing
54629	522.924	637.297	496.354	533.076	418.381	398.945	360.637	315.42	460.379	-0.530137	0.119227	-4.44644	8.73067e-06	7.27419e-05	ENSG00000128923	MINDY2	MINDY lysine 48 deubiquitinase 2
27309	924.192	772.581	949.117	988.067	718.482	659.664	620.508	628.933	782.693	-0.44644	0.10044	-4.44485	8.79526e-06	7.32419e-05	ENSG00000109445	ZNF330	zinc finger protein 330
4012	259.99	375.684	339.819	301.826	206.258	206.777	229.376	171.527	261.407	-0.616931	0.138836	-4.4436	8.84652e-06	7.36304e-05	ENSG00000113441	LNPEP	leucyl and cystinyl aminopeptidase
22919	10095.5	8660.54	9845.85	9673.45	11488.9	11594.1	12220.6	12499.6	10759.8	0.315773	0.0710658	4.44338	8.85548e-06	7.36667e-05	ENSG00000101367	MAPRE1	microtubule associated protein RP/EB family member 1
9424	231.539	254.542	205.08	196.713	153.472	151.711	137.891	133.41	183.045	-0.595601	0.134073	-4.44238	8.89696e-06	7.39733e-05	ENSG00000099337	KCNK6	potassium two pore domain channel subfamily K member 6
10732	1043.89	859.313	916.423	893.465	1160.32	1220.43	1230.41	1227.37	1068.95	0.373927	0.0841756	4.44223	8.90309e-06	7.39858e-05	ENSG00000101190	TCFL5	transcription factor like 5
2673	2218.26	2466.7	2080.53	2253.94	1704.81	1913.81	1467.74	1469.42	1946.9	-0.445407	0.100281	-4.44159	8.92967e-06	7.41681e-05	ENSG00000198380	GFPT1	glutamine--fructose-6-phosphate transaminase 1
3670	41.206	51.3797	61.4251	57.0616	18.573	28.0947	17.2363	22.8703	37.2308	-1.00404	0.226061	-4.44148	8.93438e-06	7.41688e-05	ENSG00000016082	ISL1	ISL LIM homeobox 1
93099	976.19	786.722	1216.61	1061.65	625.617	676.52	672.217	734.709	843.779	-0.544246	0.122544	-4.44123	8.9448e-06	7.42168e-05	ENSG00000161249	DMKN	dermokine
55744	1021.32	781.537	1002.62	943.019	1220.93	1251.9	1394.82	1268.35	1110.56	0.441969	0.0995549	4.43945	9.0191e-06	7.47944e-05	ENSG00000106603	COA1	cytochrome c oxidase assembly factor 1 homolog
5669	9.81095	15.5553	6.93509	10.5114	32.2584	33.7136	34.4727	35.2584	22.3145	1.12587	0.253629	4.43904	9.03609e-06	7.48965e-05	ENSG00000231924	PSG1	pregnancy specific beta-1-glycoprotein 1
1894	5231.2	5063.96	4855.55	4676.05	5838.77	5977.43	6569.7	6226.44	5554.89	0.306226	0.0690052	4.43772	9.09154e-06	7.53171e-05	ENSG00000114346	ECT2	epithelial cell transforming 2
7846	6139.69	6282.93	5905.72	6800.85	8359.81	7139.43	8237.64	8659.27	7190.67	0.358998	0.0809088	4.43707	9.11928e-06	7.54687e-05	ENSG00000167552	TUBA1A	tubulin alpha 1a
5565	2891.29	2364.88	2830.51	2332.02	3597.3	3367.99	3852.98	3262.83	3062.47	0.421199	0.0949265	4.43711	9.1175e-06	7.54687e-05	ENSG00000131791	PRKAB2	protein kinase AMP-activated non-catalytic subunit beta 2
57154	1130.22	1379.71	1137.35	1084.17	845.56	885.545	902.919	892.895	1032.3	-0.416256	0.0938462	-4.43551	9.18526e-06	7.59755e-05	ENSG00000198742	SMURF1	SMAD specific E3 ubiquitin protein ligase 1
9766	465.039	514.74	456.725	454.992	354.842	343.879	214.791	214.409	377.427	-0.683478	0.154172	-4.43321	9.28403e-06	7.67528e-05	ENSG00000100647	SUSD6	sushi domain containing 6
55304	47.0926	29.6965	41.6105	31.5341	69.4044	67.4273	79.5523	102.916	58.6543	0.918401	0.20717	4.43309	9.28936e-06	7.67572e-05	ENSG00000172296	SPTLC3	serine palmitoyltransferase long chain base subunit 3
121260	1062.53	1072.37	1043.24	1111.2	825.032	864.193	778.287	891.942	956.099	-0.3431	0.0774016	-4.43273	9.30484e-06	7.68094e-05	ENSG00000139370	SLC15A4	solute carrier family 15 member 4
170960	520.962	516.625	476.54	432.467	309.876	331.517	372.57	374.501	416.882	-0.475393	0.107246	-4.43272	9.30529e-06	7.68094e-05	ENSG00000182903	ZNF721	zinc finger protein 721
8842	2.94329	34.4102	6.93509	34.5373	0.977527	0	0	0	9.97543	-1.14693	0.258804	-4.43166	9.35099e-06	7.71469e-05	ENSG00000007062	PROM1	prominin 1
71	180056	189734	174540	186899	148585	150104	109439	123916	157909	-0.443438	0.100103	-4.4298	9.43203e-06	7.77753e-05	ENSG00000184009	ACTG1	actin gamma 1
7253	1.96219	6.12785	2.97218	3.00324	19.5505	23.5995	17.2363	17.1527	11.4506	1.22821	0.277318	4.42891	9.47111e-06	7.80574e-05	ENSG00000165409	TSHR	thyroid stimulating hormone receptor
51616	1499.11	1291.09	1294.88	1318.42	1670.59	1674.44	1824.4	1748.63	1540.2	0.349204	0.0788677	4.42772	9.52351e-06	7.84488e-05	ENSG00000187325	TAF9B	TATA-box binding protein associated factor 9b
6711	7791.86	12927.4	8680.75	8853.57	6649.14	6621.36	5963.77	4737.01	7778.11	-0.627722	0.141776	-4.42756	9.53062e-06	7.8467e-05	ENSG00000115306	SPTBN1	spectrin beta, non-erythrocytic 1
253782	477.793	576.018	473.568	491.03	366.572	370.85	372.57	358.302	435.838	-0.450126	0.101703	-4.42589	9.60436e-06	7.89521e-05	ENSG00000172292	CERS6	ceramide synthase 6
241	110.864	82.9617	130.776	100.609	34.2134	43.8277	51.709	69.5639	78.0655	-0.907978	0.205141	-4.42611	9.5947e-06	7.89521e-05	ENSG00000132965	ALOX5AP	arachidonate 5-lipoxygenase activating protein
3763	37.2816	36.7671	34.6754	60.0649	10.7528	11.2379	14.5846	20.0115	28.172	-1.10478	0.249615	-4.42593	9.60285e-06	7.89521e-05	ENSG00000157542	KCNJ6	potassium voltage-gated channel subfamily J member 6
4174	3980.3	4125.46	4309.66	3995.82	4888.61	4779.47	5245.15	5127.71	4556.52	0.2839	0.0641741	4.42391	9.693e-06	7.964e-05	ENSG00000100297	MCM5	minichromosome maintenance complex component 5
91748	1139.05	1587.59	1411.79	1211.81	1021.52	927.125	770.332	608.922	1084.77	-0.637174	0.144044	-4.42347	9.713e-06	7.97633e-05	ENSG00000156030	ELMSAN1	ELM2 and Myb/SANT domain containing 1
10043	507.226	492.585	555.798	534.578	645.167	663.035	790.22	734.709	615.415	0.426647	0.0964776	4.42224	9.76807e-06	8.01743e-05	ENSG00000100284	TOM1	target of myb1 membrane trafficking protein
5243	283.537	379.927	321.986	316.842	182.797	195.539	239.983	232.515	269.141	-0.585543	0.132422	-4.4218	9.78838e-06	8.02999e-05	ENSG00000085563	ABCB1	ATP binding cassette subfamily B member 1
57658	498.396	582.146	505.271	527.069	666.673	736.081	833.973	687.062	629.584	0.446732	0.101044	4.42117	9.81695e-06	8.0493e-05	ENSG00000012822	CALCOCO1	calcium binding and coiled-coil domain 1
30815	571.979	594.402	639.019	585.633	741.943	741.7	835.299	821.425	691.425	0.382395	0.0865132	4.42007	9.86671e-06	8.08595e-05	ENSG00000160408	ST6GALNAC6	ST6 N-acetylgalactosaminide alpha-2,6-sialyltransferase 6
388662	10.792	25.9255	10.898	28.5308	3.91011	2.24758	1.32587	2.85879	10.8111	-1.22929	0.2782	-4.41871	9.92933e-06	8.13311e-05	ENSG00000197106	SLC6A17	solute carrier family 6 member 17
91851	1449.08	1831.76	1478.16	1488.11	2035.21	1953.14	2552.3	2266.07	1881.73	0.47371	0.107221	4.41807	9.95861e-06	8.15291e-05	ENSG00000101938	CHRDL1	chordin like 1
6157	21710.7	17598.2	22970	22928.3	26462.6	27469.9	31273.3	34079.6	25561.6	0.467348	0.105818	4.41651	1.00305e-05	8.20758e-05	ENSG00000166441	RPL27A	ribosomal protein L27a
55118	169.73	154.61	169.414	181.696	86.0223	122.493	91.4852	109.587	135.63	-0.657373	0.148851	-4.41632	1.00394e-05	8.21065e-05	ENSG00000095713	CRTAC1	cartilage acidic protein 1
5430	5399.95	7370.86	6284.18	5426.86	4686.26	4483.91	3520.19	2974.09	5018.29	-0.603209	0.136614	-4.41543	1.0081e-05	8.24044e-05	ENSG00000181222	POLR2A	RNA polymerase II subunit A
55803	78.4876	78.7193	70.3416	99.1071	46.9213	41.5802	25.1916	41.9289	60.2847	-0.883042	0.200002	-4.41516	1.00937e-05	8.24662e-05	ENSG00000184060	ADAP2	ArfGAP with dual PH domains 2
4651	891.816	1177.49	826.266	836.404	674.493	678.768	600.62	573.664	782.44	-0.538228	0.121966	-4.41292	1.01987e-05	8.32818e-05	ENSG00000145555	MYO10	myosin X
8825	38.2627	49.4942	60.4343	57.0616	82.1122	101.141	133.913	91.4812	76.7375	0.853864	0.193531	4.41202	1.0241e-05	8.35839e-05	ENSG00000111052	LIN7A	lin-7 homolog A, crumbs cell polarity complex component
8531	3788.01	3656.44	3348.66	3239	2764.44	2807.22	2572.19	2893.09	3133.63	-0.340201	0.0771143	-4.41165	1.02587e-05	8.36859e-05	ENSG00000060138	YBX3	Y-box binding protein 3
1545	585.714	683.963	554.807	536.079	870.976	876.555	824.692	731.85	708.079	0.460292	0.104364	4.41045	1.03158e-05	8.41089e-05	ENSG00000138061	CYP1B1	cytochrome P450 family 1 subfamily B member 1
84991	2249.65	1997.21	2399.54	2151.82	2666.69	2746.54	2877.14	3041.75	2516.29	0.358138	0.0812377	4.40852	1.04079e-05	8.48164e-05	ENSG00000134453	RBM17	RNA binding motif protein 17
7068	328.667	391.24	325.949	300.324	443.797	507.952	502.505	471.7	409.017	0.483221	0.109622	4.40805	1.04307e-05	8.49588e-05	ENSG00000151090	THRB	thyroid hormone receptor beta
166378	398.325	477.501	394.309	369.399	310.853	295.556	243.96	216.315	338.277	-0.587917	0.133408	-4.40689	1.04864e-05	8.53695e-05	ENSG00000145375	SPATA5	spermatogenesis associated 5
128989	217.803	290.366	239.756	273.295	456.505	410.183	383.177	323.996	324.385	0.583401	0.132409	4.40604	1.05277e-05	8.56617e-05	ENSG00000183597	TANGO2	transport and golgi organization 2 homolog
84333	2312.44	2315.39	2148.89	2039.2	2758.58	3014	2704.78	2683.45	2497.09	0.332052	0.0753654	4.40589	1.05349e-05	8.56772e-05	ENSG00000180628	PCGF5	polycomb group ring finger 5
58486	832.95	824.903	851.035	903.977	1050.84	1046.25	1142.9	1073	965.732	0.333731	0.0757545	4.40543	1.05572e-05	8.58148e-05	ENSG00000236287	ZBED5	zinc finger BED-type containing 5
64781	1275.42	1305.23	1206.71	1130.72	1569.91	1472.16	1652.04	1593.3	1400.69	0.343593	0.0780099	4.40448	1.06037e-05	8.61491e-05	ENSG00000100422	CERK	ceramide kinase
9156	846.685	744.77	777.721	662.215	912.032	1046.25	1088.54	1111.12	898.666	0.438031	0.0994662	4.40382	1.06364e-05	8.63661e-05	ENSG00000174371	EXO1	exonuclease 1
51177	1054.68	1099.24	1003.61	1046.63	1308.91	1236.17	1429.29	1432.25	1201.35	0.35356	0.0802868	4.40372	1.06412e-05	8.63661e-05	ENSG00000023902	PLEKHO1	pleckstrin homology domain containing O1
3157	3812.54	3589.51	3653.8	3787.09	4272.77	4428.85	4698.89	4656.97	4112.55	0.279545	0.0634889	4.40305	1.0674e-05	8.6588e-05	ENSG00000112972	HMGCS1	3-hydroxy-3-methylglutaryl-CoA synthase 1
1032	264.896	225.788	248.672	324.35	398.831	402.316	365.941	381.172	326.496	0.530862	0.120575	4.40276	1.06883e-05	8.66607e-05	ENSG00000129355	CDKN2D	cyclin dependent kinase inhibitor 2D
25831	2734.31	3398.13	2803.76	2387.58	1930.61	2101.48	2194.32	1888.71	2429.86	-0.465185	0.105669	-4.40227	1.07122e-05	8.68102e-05	ENSG00000092148	HECTD1	HECT domain E3 ubiquitin protein ligase 1
56255	2284.97	2689.18	2328.21	2244.93	1945.28	1910.44	1693.14	1758.15	2106.79	-0.377902	0.0858854	-4.40007	1.08215e-05	8.76511e-05	ENSG00000125827	TMX4	thioredoxin related transmembrane protein 4
4685	53.9602	55.1507	57.4622	51.0552	80.1572	109.007	123.306	94.34	78.0549	0.785374	0.178496	4.39995	1.08275e-05	8.76556e-05	ENSG00000154654	NCAM2	neural cell adhesion molecule 2
221154	1550.13	1218.03	1447.45	1450.57	1804.51	1808.17	1881.41	1963.99	1640.53	0.388933	0.0884457	4.39742	1.09546e-05	8.864e-05	ENSG00000165487	MICU2	mitochondrial calcium uptake 2
2029	5102.68	4005.26	5315.25	5219.64	6201.43	6588.77	6658.53	7143.16	5779.34	0.424403	0.096535	4.39636	1.10079e-05	8.89813e-05	ENSG00000143420	ENSA	endosulfine alpha
91612	1670.81	1641.79	1483.12	1696.83	1299.13	1220.43	1341.78	1271.21	1453.14	-0.332545	0.0756407	-4.39638	1.1007e-05	8.89813e-05	ENSG00000258289	CHURC1	churchill domain containing 1
9321	1144.94	1461.73	1240.39	1114.2	917.897	885.545	962.583	876.695	1075.5	-0.435834	0.0991599	-4.39527	1.10637e-05	8.93867e-05	ENSG00000100815	TRIP11	thyroid hormone receptor interactor 11
79794	1380.4	1345.77	1242.37	1223.82	1012.72	1088.95	910.874	855.731	1132.58	-0.413739	0.094146	-4.39465	1.10953e-05	8.95966e-05	ENSG00000111412	C12orf49	chromosome 12 open reading frame 49
10005	362.024	285.652	326.94	373.904	457.482	470.867	470.685	485.041	404.074	0.475024	0.10812	4.3935	1.1154e-05	9.00257e-05	ENSG00000101473	ACOT8	acyl-CoA thioesterase 8
4478	15819.2	20098.9	15746.6	16891.7	13005	12928.1	13433.7	13053.2	15122.1	-0.377994	0.0860432	-4.39307	1.11761e-05	9.01582e-05	ENSG00000147065	MSN	moesin
6827	2172.15	2016.53	2349.01	2249.43	2542.55	2890.38	3196.68	3589.69	2625.8	0.459034	0.104541	4.39094	1.12862e-05	9.09796e-05	ENSG00000213246	SUPT4H1	SPT4 homolog, DSIF elongation factor subunit
255738	14.7164	32.9961	24.7682	33.0357	6.84269	3.37136	3.97762	9.5293	16.1547	-1.20412	0.274231	-4.39088	1.12893e-05	9.09796e-05	ENSG00000169174	PCSK9	proprotein convertase subtilisin/kexin type 9
55788	856.496	701.403	732.147	740.3	1023.47	940.611	1016.94	1006.29	877.208	0.38753	0.0882919	4.38918	1.13776e-05	9.16455e-05	ENSG00000168216	LMBRD1	LMBR1 domain containing 1
84866	287.461	278.11	280.376	337.865	214.078	171.94	205.51	206.786	247.766	-0.530937	0.121032	-4.38674	1.1506e-05	9.26327e-05	ENSG00000149582	TMEM25	transmembrane protein 25
4176	7594.66	6642.59	7961.48	7152.23	8836.84	8970.08	9722.62	9930.48	8351.37	0.345029	0.0786567	4.38652	1.15181e-05	9.26837e-05	ENSG00000166508	MCM7	minichromosome maintenance complex component 7
5933	1841.52	1861.92	1745.66	1534.66	2134.92	2176.78	2556.28	2445.22	2037.12	0.401104	0.0914567	4.38572	1.156e-05	9.29744e-05	ENSG00000080839	RBL1	RB transcriptional corepressor like 1
3673	146.183	165.923	128.795	111.12	67.4493	84.2841	92.811	52.4111	106.122	-0.805388	0.183764	-4.38273	1.17201e-05	9.42146e-05	ENSG00000164171	ITGA2	integrin subunit alpha 2
79621	745.632	613.257	856.979	726.785	1022.49	1042.88	981.145	1014.87	875.505	0.452197	0.103185	4.3824	1.17379e-05	9.42829e-05	ENSG00000136104	RNASEH2B	ribonuclease H2 subunit B
10766	861.402	1070.96	905.525	962.54	750.74	737.205	580.732	576.522	805.703	-0.500645	0.114241	-4.38235	1.17404e-05	9.42829e-05	ENSG00000183864	TOB2	transducer of ERBB2, 2
830	3639.86	3106.82	3390.27	3425.2	4879.81	4867.13	4157.93	4009.93	3934.62	0.391654	0.0893864	4.38159	1.17817e-05	9.45669e-05	ENSG00000198898	CAPZA2	capping actin protein of muscle Z-line subunit alpha 2
201305	86.3364	103.231	90.1562	76.5827	56.6965	39.3326	42.4279	48.5994	67.9203	-0.816854	0.186449	-4.3811	1.1808e-05	9.47305e-05	ENSG00000182557	SPNS3	sphingolipid transporter 3 (putative)
4330	605.336	722.144	602.362	567.613	1331.39	1181.1	820.715	779.496	826.27	0.660314	0.150751	4.38017	1.18586e-05	9.50888e-05	ENSG00000169184	MN1	MN1 proto-oncogene, transcriptional regulator
283392	60.8279	103.231	90.1562	135.146	37.146	59.5608	33.1468	38.1172	69.6664	-0.966581	0.220717	-4.37927	1.19076e-05	9.54341e-05	ENSG00000236333	TRHDE-AS1	TRHDE antisense RNA 1
84288	212.898	168.28	205.08	201.217	279.573	292.185	282.411	283.973	240.702	0.517256	0.118128	4.37877	1.19351e-05	9.55582e-05	ENSG00000203666	EFCAB2	EF-hand calcium binding domain 2
147807	162.862	159.796	159.507	150.162	217.011	233.748	229.376	242.044	194.313	0.51513	0.117643	4.37878	1.19348e-05	9.55582e-05	ENSG00000171443	ZNF524	zinc finger protein 524
7477	783.895	1239.24	835.183	1039.12	642.235	695.625	579.406	622.263	804.621	-0.582102	0.132954	-4.37822	1.19651e-05	9.57507e-05	ENSG00000188064	WNT7B	Wnt family member 7B
[truncated: 26,396 more rows]

## Sheet: GSEA
GenePattern: GSEA
GO-Term analysis (c5.go.v7.5.1)
Enrichment in phenotype: WT (4 samples)
2430 / 3001 gene sets are upregulated in phenotype WT
1595 gene sets are significant at FDR < 25%
859 gene sets are significantly enriched at nominal pvalue < 1%
1218 gene sets are significantly enriched at nominal pvalue < 5%
Enrichment in phenotype: KO (4 samples)
571 / 3001 gene sets are upregulated in phenotype KO
117 gene sets are significantly enriched at FDR < 25%
77 gene sets are significantly enriched at nominal pvalue < 1%
114 gene sets are significantly enriched at nominal pvalue < 5%
Dataset details
The dataset has 15997 native features (all genes with assigned adj. P-value by DESeq2)
After collapsing features into gene symbols, there are: 15597 genes
Gene set details
Gene set size filters (min=30, max=500) resulted in filtering out 7401 / 10402 gene sets
The remaining 3001 gene sets were used in the analysis
Gene markers for the WT versus KO comparison
The dataset has 15597 features (genes)
# of markers for phenotype WT: 7766 (49.8% ) with correlation area 54.8%
# of markers for phenotype KO: 7831 (50.2% ) with correlation area 45.2%

## Sheet: GSEA GO WT
GO enrichment in phenotype: WT
NAME	GS<br> follow link to MSigDB	SIZE	ES	NES	NOM p-val	FDR q-val	FWER p-val	RANK AT MAX	LEADING EDGE
GOMF_EXTRACELLULAR_MATRIX_STRUCTURAL_CONSTITUENT	GOMF_EXTRACELLULAR_MATRIX_STRUCTURAL_CONSTITUENT	112	0.636974	2.42055	0	0	0	2034	tags=53%, list=13%, signal=60%
GOMF_CYTOKINE_ACTIVITY	GOMF_CYTOKINE_ACTIVITY	101	0.639085	2.39699	0	0	0	1851	tags=49%, list=12%, signal=55%
GOBP_NEGATIVE_REGULATION_OF_VIRAL_GENOME_REPLICATION	GOBP_NEGATIVE_REGULATION_OF_VIRAL_GENOME_REPLICATION	45	0.694748	2.33632	0	0	0	1648	tags=42%, list=11%, signal=47%
GOBP_REGULATION_OF_VIRAL_GENOME_REPLICATION	GOBP_REGULATION_OF_VIRAL_GENOME_REPLICATION	71	0.642938	2.31246	0	0	0	1671	tags=34%, list=11%, signal=38%
GOBP_REGULATION_OF_CELL_CELL_ADHESION	GOBP_REGULATION_OF_CELL_CELL_ADHESION	296	0.53599	2.28781	0	0	0	2457	tags=38%, list=16%, signal=44%
GOMF_HEPARIN_BINDING	GOMF_HEPARIN_BINDING	104	0.592436	2.27678	0	0	0	2034	tags=43%, list=13%, signal=49%
GOCC_BASEMENT_MEMBRANE	GOCC_BASEMENT_MEMBRANE	80	0.624632	2.27474	0	0	0	2034	tags=41%, list=13%, signal=47%
GOBP_CELLULAR_RESPONSE_TO_INTERLEUKIN_1	GOBP_CELLULAR_RESPONSE_TO_INTERLEUKIN_1	69	0.637629	2.27132	0	0	0	1919	tags=42%, list=12%, signal=48%
GOBP_MONONUCLEAR_CELL_MIGRATION	GOBP_MONONUCLEAR_CELL_MIGRATION	113	0.587421	2.26305	0	0	0	2574	tags=45%, list=17%, signal=54%
GOBP_REGULATION_OF_SYNAPSE_ASSEMBLY	GOBP_REGULATION_OF_SYNAPSE_ASSEMBLY	73	0.624542	2.23902	0	0.000109707	0.001	1940	tags=48%, list=12%, signal=54%
GOBP_LEUKOCYTE_CELL_CELL_ADHESION	GOBP_LEUKOCYTE_CELL_CELL_ADHESION	239	0.53181	2.23485	0	9.97332e-05	0.001	2725	tags=40%, list=17%, signal=47%
GOBP_ENDODERM_FORMATION	GOBP_ENDODERM_FORMATION	49	0.662916	2.22147	0	9.14221e-05	0.001	1450	tags=45%, list=9%, signal=49%
GOBP_POSITIVE_REGULATION_OF_CELL_CELL_ADHESION	GOBP_POSITIVE_REGULATION_OF_CELL_CELL_ADHESION	184	0.547388	2.21865	0	8.43896e-05	0.001	2457	tags=41%, list=16%, signal=48%
GOMF_CYTOKINE_RECEPTOR_BINDING	GOMF_CYTOKINE_RECEPTOR_BINDING	153	0.552271	2.21824	0	7.83618e-05	0.001	1916	tags=35%, list=12%, signal=40%
GOBP_ENDODERM_DEVELOPMENT	GOBP_ENDODERM_DEVELOPMENT	66	0.616544	2.2179	0	7.31377e-05	0.001	2218	tags=47%, list=14%, signal=55%
GOBP_NEGATIVE_REGULATION_OF_VIRAL_PROCESS	GOBP_NEGATIVE_REGULATION_OF_VIRAL_PROCESS	65	0.625085	2.20816	0	6.85666e-05	0.001	1648	tags=35%, list=11%, signal=39%
GOBP_BRANCHING_MORPHOGENESIS_OF_AN_EPITHELIAL_TUBE	GOBP_BRANCHING_MORPHOGENESIS_OF_AN_EPITHELIAL_TUBE	119	0.570352	2.20193	0	6.45333e-05	0.001	1938	tags=45%, list=12%, signal=50%
GOBP_CELLULAR_RESPONSE_TO_MOLECULE_OF_BACTERIAL_ORIGIN	GOBP_CELLULAR_RESPONSE_TO_MOLECULE_OF_BACTERIAL_ORIGIN	142	0.549331	2.18874	0	6.09481e-05	0.001	2036	tags=35%, list=13%, signal=39%
GOBP_MAINTENANCE_OF_BLOOD_BRAIN_BARRIER	GOBP_MAINTENANCE_OF_BLOOD_BRAIN_BARRIER	30	0.715039	2.18748	0	5.77403e-05	0.001	2434	tags=73%, list=16%, signal=87%
GOBP_CELL_CELL_ADHESION_VIA_PLASMA_MEMBRANE_ADHESION_MOLECULES	GOBP_CELL_CELL_ADHESION_VIA_PLASMA_MEMBRANE_ADHESION_MOLECULES	177	0.538245	2.1828	0	5.48533e-05	0.001	3056	tags=49%, list=20%, signal=60%
GOBP_MORPHOGENESIS_OF_AN_EPITHELIUM	GOBP_MORPHOGENESIS_OF_AN_EPITHELIUM	413	0.495329	2.18251	0	5.22412e-05	0.001	2042	tags=33%, list=13%, signal=37%
GOBP_REGULATION_OF_VIRAL_PROCESS	GOBP_REGULATION_OF_VIRAL_PROCESS	120	0.559405	2.17481	0	4.98666e-05	0.001	1671	tags=28%, list=11%, signal=31%
GOCC_ENDOPLASMIC_RETICULUM_LUMEN	GOCC_ENDOPLASMIC_RETICULUM_LUMEN	240	0.515924	2.17201	0	4.76985e-05	0.001	3015	tags=40%, list=19%, signal=49%
GOBP_POSITIVE_REGULATION_OF_LEUKOCYTE_CELL_CELL_ADHESION	GOBP_POSITIVE_REGULATION_OF_LEUKOCYTE_CELL_CELL_ADHESION	154	0.540225	2.16412	0	9.24778e-05	0.002	2457	tags=40%, list=16%, signal=47%
GOBP_RESPONSE_TO_CHEMOKINE	GOBP_RESPONSE_TO_CHEMOKINE	46	0.651638	2.1602	0	8.87787e-05	0.002	2334	tags=54%, list=15%, signal=64%
GOBP_ENDODERMAL_CELL_DIFFERENTIATION	GOBP_ENDODERMAL_CELL_DIFFERENTIATION	40	0.656067	2.15706	0	8.53641e-05	0.002	2034	tags=48%, list=13%, signal=54%
GOMF_EXTRACELLULAR_MATRIX_STRUCTURAL_CONSTITUENT_CONFERRING_TENSILE_STRENGTH	GOMF_EXTRACELLULAR_MATRIX_STRUCTURAL_CONSTITUENT_CONFERRING_TENSILE_STRENGTH	32	0.697543	2.15486	0	8.22025e-05	0.002	2034	tags=66%, list=13%, signal=75%
GOCC_PLASMA_MEMBRANE_SIGNALING_RECEPTOR_COMPLEX	GOCC_PLASMA_MEMBRANE_SIGNALING_RECEPTOR_COMPLEX	117	0.558609	2.15203	0	7.92667e-05	0.002	2998	tags=44%, list=19%, signal=55%
GOBP_STEM_CELL_PROLIFERATION	GOBP_STEM_CELL_PROLIFERATION	54	0.616592	2.1459	0	7.65334e-05	0.002	2209	tags=44%, list=14%, signal=52%
GOBP_BLOOD_VESSEL_MORPHOGENESIS	GOBP_BLOOD_VESSEL_MORPHOGENESIS	495	0.484019	2.14243	0	7.39822e-05	0.002	3018	tags=41%, list=19%, signal=49%
GOBP_TAXIS	GOBP_TAXIS	409	0.487195	2.13961	0	7.15957e-05	0.002	1954	tags=33%, list=13%, signal=36%
GOBP_MORPHOGENESIS_OF_A_BRANCHING_STRUCTURE	GOBP_MORPHOGENESIS_OF_A_BRANCHING_STRUCTURE	151	0.534634	2.13642	0	0.000103797	0.003	2981	tags=49%, list=19%, signal=60%
GOBP_TISSUE_MORPHOGENESIS	GOBP_TISSUE_MORPHOGENESIS	491	0.480564	2.13247	0	0.000100652	0.003	3015	tags=40%, list=19%, signal=48%
GOBP_VIRAL_GENOME_REPLICATION	GOBP_VIRAL_GENOME_REPLICATION	112	0.555949	2.12986	0	9.76914e-05	0.003	1682	tags=28%, list=11%, signal=31%
GOBP_REGULATION_OF_BODY_FLUID_LEVELS	GOBP_REGULATION_OF_BODY_FLUID_LEVELS	268	0.503503	2.12387	0	0.00012609	0.004	2646	tags=35%, list=17%, signal=42%
GOBP_POSITIVE_REGULATION_OF_VASCULATURE_DEVELOPMENT	GOBP_POSITIVE_REGULATION_OF_VASCULATURE_DEVELOPMENT	123	0.545778	2.12296	0	0.000122588	0.004	2256	tags=42%, list=14%, signal=49%
GOBP_POSITIVE_REGULATION_OF_CELL_ADHESION	GOBP_POSITIVE_REGULATION_OF_CELL_ADHESION	313	0.496479	2.12126	0	0.000149764	0.005	2497	tags=38%, list=16%, signal=45%
GOBP_HEMOSTASIS	GOBP_HEMOSTASIS	162	0.521109	2.12026	0	0.000145823	0.005	3268	tags=45%, list=21%, signal=56%
GOCC_COLLAGEN_CONTAINING_EXTRACELLULAR_MATRIX	GOCC_COLLAGEN_CONTAINING_EXTRACELLULAR_MATRIX	279	0.49557	2.11763	0	0.000142084	0.005	2060	tags=38%, list=13%, signal=43%
GOBP_CELL_CHEMOTAXIS	GOBP_CELL_CHEMOTAXIS	184	0.518511	2.11291	0	0.000138532	0.005	1864	tags=35%, list=12%, signal=39%
GOBP_EPITHELIAL_CELL_DEVELOPMENT	GOBP_EPITHELIAL_CELL_DEVELOPMENT	160	0.525493	2.10458	0	0.000162542	0.006	4072	tags=51%, list=26%, signal=68%
GOMF_GLYCOSAMINOGLYCAN_BINDING	GOMF_GLYCOSAMINOGLYCAN_BINDING	142	0.533026	2.10255	0	0.000185127	0.007	2420	tags=42%, list=16%, signal=50%
GOBP_REGULATION_OF_CELL_JUNCTION_ASSEMBLY	GOBP_REGULATION_OF_CELL_JUNCTION_ASSEMBLY	154	0.52489	2.1017	0	0.000180821	0.007	2420	tags=44%, list=16%, signal=51%
GOBP_FORMATION_OF_PRIMARY_GERM_LAYER	GOBP_FORMATION_OF_PRIMARY_GERM_LAYER	101	0.547014	2.10123	0	0.000176712	0.007	2311	tags=49%, list=15%, signal=57%
GOBP_RESPONSE_TO_INTERLEUKIN_1	GOBP_RESPONSE_TO_INTERLEUKIN_1	89	0.565168	2.09964	0	0.000222263	0.009	2229	tags=35%, list=14%, signal=40%
GOBP_MUCOPOLYSACCHARIDE_METABOLIC_PROCESS	GOBP_MUCOPOLYSACCHARIDE_METABOLIC_PROCESS	73	0.591094	2.09804	0	0.000217431	0.009	2189	tags=40%, list=14%, signal=46%
GOBP_CELL_JUNCTION_ASSEMBLY	GOBP_CELL_JUNCTION_ASSEMBLY	324	0.486649	2.09185	0	0.00026	0.011	2262	tags=35%, list=15%, signal=41%
GOBP_REGULATION_OF_MONONUCLEAR_CELL_MIGRATION	GOBP_REGULATION_OF_MONONUCLEAR_CELL_MIGRATION	78	0.576725	2.09087	0	0.000254583	0.011	3599	tags=56%, list=23%, signal=73%
GOBP_POSITIVE_REGULATION_OF_LEUKOCYTE_PROLIFERATION	GOBP_POSITIVE_REGULATION_OF_LEUKOCYTE_PROLIFERATION	98	0.553247	2.0877	0	0.000271586	0.012	2521	tags=43%, list=16%, signal=51%
GOBP_REGULATION_OF_WOUND_HEALING	GOBP_REGULATION_OF_WOUND_HEALING	86	0.56479	2.08529	0	0.000288428	0.013	2614	tags=51%, list=17%, signal=61%
GOMF_GROWTH_FACTOR_RECEPTOR_BINDING	GOMF_GROWTH_FACTOR_RECEPTOR_BINDING	95	0.553314	2.082	0	0.000282772	0.013	3518	tags=51%, list=23%, signal=65%
GOBP_POSITIVE_REGULATION_OF_INTERLEUKIN_6_PRODUCTION	GOBP_POSITIVE_REGULATION_OF_INTERLEUKIN_6_PRODUCTION	63	0.593477	2.08027	0	0.000298909	0.014	2684	tags=38%, list=17%, signal=46%
GOBP_REGULATION_OF_RESPONSE_TO_WOUNDING	GOBP_REGULATION_OF_RESPONSE_TO_WOUNDING	108	0.543345	2.08026	0	0.000293269	0.014	3050	tags=52%, list=20%, signal=64%
GOBP_CELLULAR_RESPONSE_TO_BIOTIC_STIMULUS	GOBP_CELLULAR_RESPONSE_TO_BIOTIC_STIMULUS	167	0.512741	2.07944	0	0.000287838	0.014	2036	tags=32%, list=13%, signal=36%
GOBP_CHEMOKINE_PRODUCTION	GOBP_CHEMOKINE_PRODUCTION	59	0.591707	2.07888	0	0.000282605	0.014	3341	tags=58%, list=21%, signal=73%
GOBP_REGULATION_OF_INFLAMMATORY_RESPONSE	GOBP_REGULATION_OF_INFLAMMATORY_RESPONSE	232	0.496767	2.07733	0	0.000296991	0.015	2979	tags=38%, list=19%, signal=46%
GOBP_POSITIVE_REGULATION_OF_LOCOMOTION	GOBP_POSITIVE_REGULATION_OF_LOCOMOTION	438	0.47443	2.07684	0	0.000291781	0.015	2630	tags=36%, list=17%, signal=42%
GOBP_NEPHRON_EPITHELIUM_DEVELOPMENT	GOBP_NEPHRON_EPITHELIUM_DEVELOPMENT	87	0.560988	2.07267	0	0.000325238	0.017	1889	tags=44%, list=12%, signal=49%
GOBP_REGULATION_OF_T_CELL_ACTIVATION	GOBP_REGULATION_OF_T_CELL_ACTIVATION	215	0.49316	2.07124	0	0.000338618	0.018	2457	tags=33%, list=16%, signal=38%
GOBP_EPITHELIAL_CELL_DIFFERENTIATION_INVOLVED_IN_KIDNEY_DEVELOPMENT	GOBP_EPITHELIAL_CELL_DIFFERENTIATION_INVOLVED_IN_KIDNEY_DEVELOPMENT	41	0.63731	2.07032	0	0.000351777	0.019	1978	tags=54%, list=13%, signal=61%
GOBP_REGULATION_OF_CELL_ACTIVATION	GOBP_REGULATION_OF_CELL_ACTIVATION	399	0.469353	2.06986	0	0.00034601	0.019	2777	tags=34%, list=18%, signal=41%
GOBP_ENDOTHELIAL_CELL_APOPTOTIC_PROCESS	GOBP_ENDOTHELIAL_CELL_APOPTOTIC_PROCESS	42	0.629319	2.06819	0	0.000358317	0.02	1951	tags=43%, list=13%, signal=49%
GOBP_REGULATION_OF_EXTRACELLULAR_MATRIX_ORGANIZATION	GOBP_REGULATION_OF_EXTRACELLULAR_MATRIX_ORGANIZATION	41	0.642901	2.06726	0	0.000369942	0.021	2365	tags=46%, list=15%, signal=54%
GOBP_T_CELL_SELECTION	GOBP_T_CELL_SELECTION	30	0.677369	2.0672	0	0.000364162	0.021	1844	tags=43%, list=12%, signal=49%
GOBP_PLATELET_AGGREGATION	GOBP_PLATELET_AGGREGATION	50	0.613259	2.06718	0	0.000358559	0.021	3268	tags=56%, list=21%, signal=71%
GOBP_CELLULAR_RESPONSE_TO_VIRUS	GOBP_CELLULAR_RESPONSE_TO_VIRUS	66	0.5872	2.06674	0	0.000353126	0.021	2077	tags=35%, list=13%, signal=40%
GOBP_REGULATION_OF_VASCULATURE_DEVELOPMENT	GOBP_REGULATION_OF_VASCULATURE_DEVELOPMENT	221	0.496925	2.06665	0	0.000347856	0.021	2288	tags=37%, list=15%, signal=42%
GOBP_EPITHELIAL_CELL_APOPTOTIC_PROCESS	GOBP_EPITHELIAL_CELL_APOPTOTIC_PROCESS	85	0.555283	2.06347	0	0.000358794	0.022	1951	tags=32%, list=13%, signal=36%
GOBP_RESPONSE_TO_FATTY_ACID	GOBP_RESPONSE_TO_FATTY_ACID	48	0.611411	2.06312	0	0.000353594	0.022	2420	tags=44%, list=16%, signal=52%
GOBP_RESPONSE_TO_TYPE_I_INTERFERON	GOBP_RESPONSE_TO_TYPE_I_INTERFERON	56	0.600796	2.06294	0	0.000348543	0.022	4054	tags=54%, list=26%, signal=72%
GOBP_INTERLEUKIN_10_PRODUCTION	GOBP_INTERLEUKIN_10_PRODUCTION	32	0.678773	2.0625	0	0.000343634	0.022	1301	tags=44%, list=8%, signal=48%
GOBP_INFLAMMATORY_RESPONSE	GOBP_INFLAMMATORY_RESPONSE	474	0.465676	2.06161	0	0.000338861	0.022	2758	tags=34%, list=18%, signal=41%
GOBP_POSITIVE_REGULATION_OF_CELL_JUNCTION_ASSEMBLY	GOBP_POSITIVE_REGULATION_OF_CELL_JUNCTION_ASSEMBLY	71	0.568686	2.06092	0	0.000349587	0.023	1940	tags=45%, list=12%, signal=51%
GOBP_REGULATION_OF_NEUROTRANSMITTER_RECEPTOR_ACTIVITY	GOBP_REGULATION_OF_NEUROTRANSMITTER_RECEPTOR_ACTIVITY	41	0.640943	2.0608	0	0.000344863	0.023	2136	tags=37%, list=14%, signal=42%
GOBP_EPITHELIAL_TUBE_MORPHOGENESIS	GOBP_EPITHELIAL_TUBE_MORPHOGENESIS	262	0.486043	2.05942	0	0.000340265	0.023	2197	tags=34%, list=14%, signal=39%
GOBP_WOUND_HEALING	GOBP_WOUND_HEALING	316	0.485446	2.05911	0	0.000335788	0.023	3310	tags=44%, list=21%, signal=55%
GOBP_ERK1_AND_ERK2_CASCADE	GOBP_ERK1_AND_ERK2_CASCADE	215	0.493856	2.05857	0	0.000331427	0.023	2425	tags=37%, list=16%, signal=43%
GOCC_EXTERNAL_ENCAPSULATING_STRUCTURE	GOCC_EXTERNAL_ENCAPSULATING_STRUCTURE	356	0.475362	2.05558	0	0.000327178	0.023	2060	tags=36%, list=13%, signal=41%
GOBP_REGULATION_OF_NERVOUS_SYSTEM_PROCESS	GOBP_REGULATION_OF_NERVOUS_SYSTEM_PROCESS	85	0.557191	2.05322	0	0.000336974	0.024	2635	tags=40%, list=17%, signal=48%
GOBP_REGULATION_OF_CARTILAGE_DEVELOPMENT	GOBP_REGULATION_OF_CARTILAGE_DEVELOPMENT	61	0.584765	2.04842	0	0.000374234	0.027	3566	tags=54%, list=23%, signal=70%
GOBP_SYNAPSE_ORGANIZATION	GOBP_SYNAPSE_ORGANIZATION	321	0.476456	2.04835	0	0.000369614	0.027	3348	tags=41%, list=21%, signal=52%
GOMF_SIGNALING_RECEPTOR_REGULATOR_ACTIVITY	GOMF_SIGNALING_RECEPTOR_REGULATOR_ACTIVITY	262	0.482727	2.04597	0	0.000392022	0.029	1882	tags=35%, list=12%, signal=39%
GOBP_REGULATION_OF_COAGULATION	GOBP_REGULATION_OF_COAGULATION	47	0.619873	2.04539	0	0.000387299	0.029	1347	tags=40%, list=9%, signal=44%
GOBP_CYTOKINE_MEDIATED_SIGNALING_PATHWAY	GOBP_CYTOKINE_MEDIATED_SIGNALING_PATHWAY	311	0.477389	2.04496	0	0.000395737	0.03	2351	tags=32%, list=15%, signal=37%
GOBP_CELL_ADHESION_MEDIATED_BY_INTEGRIN	GOBP_CELL_ADHESION_MEDIATED_BY_INTEGRIN	66	0.574888	2.04411	0	0.000391081	0.03	2285	tags=47%, list=15%, signal=55%
GOBP_NEGATIVE_REGULATION_OF_WOUND_HEALING	GOBP_NEGATIVE_REGULATION_OF_WOUND_HEALING	44	0.626029	2.04367	0	0.000386533	0.03	2536	tags=61%, list=16%, signal=73%
GOBP_NEGATIVE_REGULATION_OF_COAGULATION	GOBP_NEGATIVE_REGULATION_OF_COAGULATION	31	0.673789	2.04164	0	0.00038209	0.03	2324	tags=61%, list=15%, signal=72%
GOBP_RESPONSE_TO_TUMOR_NECROSIS_FACTOR	GOBP_RESPONSE_TO_TUMOR_NECROSIS_FACTOR	174	0.504619	2.03612	0	0.000427815	0.034	1919	tags=28%, list=12%, signal=32%
GOBP_LEUKOCYTE_MIGRATION	GOBP_LEUKOCYTE_MIGRATION	236	0.48736	2.03484	0	0.000423008	0.034	2333	tags=35%, list=15%, signal=41%
GOBP_REGULATION_OF_EPITHELIAL_CELL_MIGRATION	GOBP_REGULATION_OF_EPITHELIAL_CELL_MIGRATION	199	0.498131	2.03425	0	0.000418308	0.034	3050	tags=43%, list=20%, signal=53%
GOBP_CELL_DIFFERENTIATION_INVOLVED_IN_KIDNEY_DEVELOPMENT	GOBP_CELL_DIFFERENTIATION_INVOLVED_IN_KIDNEY_DEVELOPMENT	49	0.606881	2.03276	0	0.000413711	0.034	1978	tags=49%, list=13%, signal=56%
GOBP_NEPHRON_DEVELOPMENT	GOBP_NEPHRON_DEVELOPMENT	114	0.527942	2.0324	0	0.000409214	0.034	1978	tags=41%, list=13%, signal=47%
GOBP_METANEPHROS_DEVELOPMENT	GOBP_METANEPHROS_DEVELOPMENT	66	0.569516	2.03063	0	0.000428498	0.036	1851	tags=41%, list=12%, signal=46%
GOBP_ENDOTHELIUM_DEVELOPMENT	GOBP_ENDOTHELIUM_DEVELOPMENT	103	0.538685	2.03058	0	0.000423939	0.036	3835	tags=57%, list=25%, signal=75%
GOBP_NEGATIVE_REGULATION_OF_CELL_ADHESION	GOBP_NEGATIVE_REGULATION_OF_CELL_ADHESION	209	0.489564	2.02926	0	0.000431216	0.037	2218	tags=34%, list=14%, signal=40%
GOBP_INTERLEUKIN_6_PRODUCTION	GOBP_INTERLEUKIN_6_PRODUCTION	98	0.537586	2.02845	0	0.000426724	0.037	1616	tags=29%, list=10%, signal=32%
GOBP_REGULATION_OF_LEUKOCYTE_MIGRATION	GOBP_REGULATION_OF_LEUKOCYTE_MIGRATION	143	0.511394	2.02523	0	0.000445463	0.039	2592	tags=39%, list=17%, signal=47%
GOBP_TISSUE_REMODELING	GOBP_TISSUE_REMODELING	124	0.523473	2.02455	0	0.000440917	0.039	2086	tags=35%, list=13%, signal=40%
GOBP_EXTERNAL_ENCAPSULATING_STRUCTURE_ORGANIZATION	GOBP_EXTERNAL_ENCAPSULATING_STRUCTURE_ORGANIZATION	223	0.489357	2.02344	0	0.000436463	0.039	2060	tags=35%, list=13%, signal=40%
GOBP_REGULATION_OF_SYNAPSE_STRUCTURE_OR_ACTIVITY	GOBP_REGULATION_OF_SYNAPSE_STRUCTURE_OR_ACTIVITY	162	0.501654	2.02181	0	0.000443205	0.04	3331	tags=44%, list=21%, signal=55%
GOBP_REGULATION_OF_SPROUTING_ANGIOGENESIS	GOBP_REGULATION_OF_SPROUTING_ANGIOGENESIS	32	0.648457	2.02081	0	0.000438817	0.04	3108	tags=56%, list=20%, signal=70%
GOBP_REGULATION_OF_LEUKOCYTE_DIFFERENTIATION	GOBP_REGULATION_OF_LEUKOCYTE_DIFFERENTIATION	193	0.492618	2.01951	0	0.00044558	0.041	2435	tags=32%, list=16%, signal=38%
GOBP_RENAL_TUBULE_DEVELOPMENT	GOBP_RENAL_TUBULE_DEVELOPMENT	77	0.562426	2.01812	0	0.000441254	0.041	1889	tags=44%, list=12%, signal=50%
GOMF_SULFUR_COMPOUND_BINDING	GOMF_SULFUR_COMPOUND_BINDING	188	0.487573	2.00733	0	0.000511083	0.048	2034	tags=29%, list=13%, signal=33%
GOBP_RESPONSE_TO_CORTICOSTEROID	GOBP_RESPONSE_TO_CORTICOSTEROID	116	0.525034	2.00455	0	0.00051697	0.049	2501	tags=34%, list=16%, signal=41%
GOBP_ENDOTHELIAL_CELL_DEVELOPMENT	GOBP_ENDOTHELIAL_CELL_DEVELOPMENT	57	0.579634	2.00454	0	0.000512093	0.049	4038	tags=61%, list=26%, signal=83%
GOBP_INTERLEUKIN_2_PRODUCTION	GOBP_INTERLEUKIN_2_PRODUCTION	41	0.611218	2.00415	0	0.000517715	0.05	2036	tags=41%, list=13%, signal=48%
GOBP_NEGATIVE_REGULATION_OF_CELL_CELL_ADHESION	GOBP_NEGATIVE_REGULATION_OF_CELL_CELL_ADHESION	127	0.509503	2.00394	0	0.000512922	0.05	3787	tags=50%, list=24%, signal=65%
GOMF_SOLUTE_CATION_SYMPORTER_ACTIVITY	GOMF_SOLUTE_CATION_SYMPORTER_ACTIVITY	59	0.576913	2.00385	0	0.000508216	0.05	3292	tags=53%, list=21%, signal=66%
GOBP_ACUTE_INFLAMMATORY_RESPONSE	GOBP_ACUTE_INFLAMMATORY_RESPONSE	59	0.582804	2.00353	0	0.000513715	0.051	2719	tags=49%, list=17%, signal=59%
GOBP_CELL_FATE_COMMITMENT	GOBP_CELL_FATE_COMMITMENT	156	0.498818	2.00305	0	0.000509087	0.051	1860	tags=34%, list=12%, signal=38%
GOBP_NEGATIVE_REGULATION_OF_RESPONSE_TO_WOUNDING	GOBP_NEGATIVE_REGULATION_OF_RESPONSE_TO_WOUNDING	55	0.583039	2.00101	0	0.000514372	0.052	3004	tags=60%, list=19%, signal=74%
GOBP_LYMPHOCYTE_MIGRATION	GOBP_LYMPHOCYTE_MIGRATION	64	0.570616	1.99915	0	0.000519468	0.053	3599	tags=59%, list=23%, signal=77%
GOBP_RESPONSE_TO_FLUID_SHEAR_STRESS	GOBP_RESPONSE_TO_FLUID_SHEAR_STRESS	32	0.653726	1.99757	0	0.000553297	0.056	1582	tags=34%, list=10%, signal=38%
GOBP_REGULATION_OF_BONE_REMODELING	GOBP_REGULATION_OF_BONE_REMODELING	33	0.636451	1.99686	0	0.000558073	0.057	1851	tags=39%, list=12%, signal=45%
GOBP_POSITIVE_REGULATION_OF_CELL_ACTIVATION	GOBP_POSITIVE_REGULATION_OF_CELL_ACTIVATION	234	0.48052	1.99629	0	0.00057245	0.059	2763	tags=37%, list=18%, signal=44%
GOBP_DEFENSE_RESPONSE_TO_SYMBIONT	GOBP_DEFENSE_RESPONSE_TO_SYMBIONT	216	0.479241	1.99543	0	0.000567557	0.059	2753	tags=34%, list=18%, signal=40%
GOBP_CELLULAR_RESPONSE_TO_CALCIUM_ION	GOBP_CELLULAR_RESPONSE_TO_CALCIUM_ION	64	0.570291	1.99477	0	0.000572172	0.06	2382	tags=41%, list=15%, signal=48%
GOBP_REGULATION_OF_RESPONSE_TO_CYTOKINE_STIMULUS	GOBP_REGULATION_OF_RESPONSE_TO_CYTOKINE_STIMULUS	131	0.516248	1.99441	0	0.000576663	0.061	3015	tags=39%, list=19%, signal=48%
GOBP_DSRNA_PROCESSING	GOBP_DSRNA_PROCESSING	50	0.587584	1.99248	0	0.000599844	0.064	3403	tags=46%, list=22%, signal=59%
GOMF_SECONDARY_ACTIVE_TRANSMEMBRANE_TRANSPORTER_ACTIVITY	GOMF_SECONDARY_ACTIVE_TRANSMEMBRANE_TRANSPORTER_ACTIVITY	154	0.496796	1.98759	0	0.000622519	0.067	3606	tags=46%, list=23%, signal=59%
GOBP_GASTRULATION	GOBP_GASTRULATION	150	0.497488	1.98429	0	0.000644469	0.07	2664	tags=42%, list=17%, signal=50%
GOBP_ADHERENS_JUNCTION_ORGANIZATION	GOBP_ADHERENS_JUNCTION_ORGANIZATION	42	0.618054	1.98055	0	0.00067559	0.074	4533	tags=67%, list=29%, signal=94%
GOBP_REGULATION_OF_LEUKOCYTE_PROLIFERATION	GOBP_REGULATION_OF_LEUKOCYTE_PROLIFERATION	153	0.492883	1.97993	0	0.000687951	0.076	2521	tags=35%, list=16%, signal=41%
GOBP_PLATELET_ACTIVATION	GOBP_PLATELET_ACTIVATION	96	0.520132	1.97761	0	0.000700144	0.078	3268	tags=47%, list=21%, signal=59%
GOBP_TUMOR_NECROSIS_FACTOR_SUPERFAMILY_CYTOKINE_PRODUCTION	GOBP_TUMOR_NECROSIS_FACTOR_SUPERFAMILY_CYTOKINE_PRODUCTION	113	0.516533	1.97098	0	0.000755962	0.085	3379	tags=43%, list=22%, signal=55%
GOCC_SCHAFFER_COLLATERAL_CA1_SYNAPSE	GOCC_SCHAFFER_COLLATERAL_CA1_SYNAPSE	52	0.576424	1.97038	0	0.00075001	0.085	3165	tags=52%, list=20%, signal=65%
GOBP_MONOCYTE_DIFFERENTIATION	GOBP_MONOCYTE_DIFFERENTIATION	31	0.634083	1.96934	0	0.000752831	0.086	1937	tags=52%, list=12%, signal=59%
GOBP_REGULATION_OF_PLATELET_ACTIVATION	GOBP_REGULATION_OF_PLATELET_ACTIVATION	32	0.647865	1.96755	0	0.000755644	0.087	2351	tags=53%, list=15%, signal=62%
GOBP_ESTABLISHMENT_OF_ENDOTHELIAL_BARRIER	GOBP_ESTABLISHMENT_OF_ENDOTHELIAL_BARRIER	44	0.602436	1.96713	0	0.000749831	0.087	4038	tags=64%, list=26%, signal=86%
GOBP_BONE_REMODELING	GOBP_BONE_REMODELING	66	0.548102	1.96551	0	0.000769162	0.09	1851	tags=33%, list=12%, signal=38%
GOBP_REGULATION_OF_LYMPHOCYTE_ACTIVATION	GOBP_REGULATION_OF_LYMPHOCYTE_ACTIVATION	299	0.459522	1.96506	0	0.000763335	0.09	2777	tags=32%, list=18%, signal=38%
GOBP_POSITIVE_REGULATION_OF_SYNAPSE_ASSEMBLY	GOBP_POSITIVE_REGULATION_OF_SYNAPSE_ASSEMBLY	40	0.608927	1.96359	0	0.000765734	0.091	1940	tags=50%, list=12%, signal=57%
GOBP_SYNAPSE_ASSEMBLY	GOBP_SYNAPSE_ASSEMBLY	131	0.501385	1.96359	0	0.000760019	0.091	1954	tags=34%, list=13%, signal=38%
GOBP_ALPHA_BETA_T_CELL_DIFFERENTIATION	GOBP_ALPHA_BETA_T_CELL_DIFFERENTIATION	74	0.5401	1.96341	0	0.000770824	0.093	3717	tags=54%, list=24%, signal=71%
GOBP_RESPONSE_TO_MOLECULE_OF_BACTERIAL_ORIGIN	GOBP_RESPONSE_TO_MOLECULE_OF_BACTERIAL_ORIGIN	230	0.469793	1.96089	0	0.000797771	0.097	2430	tags=33%, list=16%, signal=38%
GOBP_LENS_DEVELOPMENT_IN_CAMERA_TYPE_EYE	GOBP_LENS_DEVELOPMENT_IN_CAMERA_TYPE_EYE	61	0.566457	1.96023	0	0.000800167	0.098	3202	tags=49%, list=21%, signal=62%
GOMF_GROWTH_FACTOR_ACTIVITY	GOMF_GROWTH_FACTOR_ACTIVITY	97	0.523643	1.95914	0	0.000834623	0.103	1882	tags=38%, list=12%, signal=43%
GOBP_RESPONSE_TO_ZINC_ION	GOBP_RESPONSE_TO_ZINC_ION	35	0.636385	1.95904	0	0.000828619	0.103	2687	tags=46%, list=17%, signal=55%
GOBP_ODONTOGENESIS_OF_DENTIN_CONTAINING_TOOTH	GOBP_ODONTOGENESIS_OF_DENTIN_CONTAINING_TOOTH	59	0.557822	1.95723	0	0.000870071	0.108	2209	tags=41%, list=14%, signal=47%
GOMF_SYMPORTER_ACTIVITY	GOMF_SYMPORTER_ACTIVITY	85	0.525056	1.95652	0	0.000895388	0.112	3449	tags=54%, list=22%, signal=69%
GOBP_NEGATIVE_REGULATION_OF_RESPONSE_TO_EXTERNAL_STIMULUS	GOBP_NEGATIVE_REGULATION_OF_RESPONSE_TO_EXTERNAL_STIMULUS	263	0.462319	1.95554	0	0.000928114	0.116	2758	tags=35%, list=18%, signal=42%
GOBP_RESPONSE_TO_WOUNDING	GOBP_RESPONSE_TO_WOUNDING	407	0.450173	1.95469	0	0.000944697	0.119	3403	tags=43%, list=22%, signal=53%
GOBP_APOPTOTIC_PROCESS_INVOLVED_IN_DEVELOPMENT	GOBP_APOPTOTIC_PROCESS_INVOLVED_IN_DEVELOPMENT	34	0.63683	1.95233	0	0.000992024	0.124	2325	tags=47%, list=15%, signal=55%
GOBP_AMEBOIDAL_TYPE_CELL_MIGRATION	GOBP_AMEBOIDAL_TYPE_CELL_MIGRATION	356	0.449	1.95178	0	0.000985182	0.124	3050	tags=41%, list=20%, signal=49%
GOBP_POSITIVE_REGULATION_OF_TUMOR_NECROSIS_FACTOR_SUPERFAMILY_CYTOKINE_PRODUCTION	GOBP_POSITIVE_REGULATION_OF_TUMOR_NECROSIS_FACTOR_SUPERFAMILY_CYTOKINE_PRODUCTION	71	0.548534	1.95172	0	0.000978434	0.124	3379	tags=49%, list=22%, signal=63%
GOBP_SMOOTH_MUSCLE_CELL_MIGRATION	GOBP_SMOOTH_MUSCLE_CELL_MIGRATION	59	0.56368	1.95124	0	0.000979211	0.125	1802	tags=37%, list=12%, signal=42%
GOBP_POSITIVE_REGULATION_OF_STRESS_ACTIVATED_PROTEIN_KINASE_SIGNALING_CASCADE	GOBP_POSITIVE_REGULATION_OF_STRESS_ACTIVATED_PROTEIN_KINASE_SIGNALING_CASCADE	102	0.508996	1.95016	0	0.00100234	0.129	3456	tags=43%, list=22%, signal=55%
GOBP_REGULATION_OF_DEFENSE_RESPONSE	GOBP_REGULATION_OF_DEFENSE_RESPONSE	417	0.445668	1.94874	0	0.00101799	0.132	3086	tags=35%, list=20%, signal=42%
GOBP_REGULATION_OF_EPITHELIAL_CELL_APOPTOTIC_PROCESS	GOBP_REGULATION_OF_EPITHELIAL_CELL_APOPTOTIC_PROCESS	65	0.552681	1.94868	0	0.0010112	0.132	1876	tags=31%, list=12%, signal=35%
GOBP_SPROUTING_ANGIOGENESIS	GOBP_SPROUTING_ANGIOGENESIS	109	0.507162	1.94795	0	0.00103374	0.135	3108	tags=44%, list=20%, signal=55%
GOBP_INTERLEUKIN_1_PRODUCTION	GOBP_INTERLEUKIN_1_PRODUCTION	64	0.558718	1.94697	0	0.00104149	0.135	3004	tags=45%, list=19%, signal=56%
GOBP_RESPONSE_TO_INTERFERON_GAMMA	GOBP_RESPONSE_TO_INTERFERON_GAMMA	90	0.533384	1.94691	0	0.00103469	0.135	3001	tags=44%, list=19%, signal=55%
GOBP_POSITIVE_REGULATION_OF_CHEMOKINE_PRODUCTION	GOBP_POSITIVE_REGULATION_OF_CHEMOKINE_PRODUCTION	43	0.585213	1.9439	0	0.00108505	0.141	3341	tags=60%, list=21%, signal=77%
GOBP_PANCREAS_DEVELOPMENT	GOBP_PANCREAS_DEVELOPMENT	55	0.575663	1.93759	0	0.0011924	0.155	2278	tags=33%, list=15%, signal=38%
GOBP_CELL_CELL_JUNCTION_ORGANIZATION	GOBP_CELL_CELL_JUNCTION_ORGANIZATION	160	0.481359	1.93752	0	0.00118476	0.155	3348	tags=44%, list=21%, signal=56%
GOMF_DOUBLE_STRANDED_RNA_BINDING	GOMF_DOUBLE_STRANDED_RNA_BINDING	66	0.554003	1.93631	0	0.00119819	0.158	1822	tags=30%, list=12%, signal=34%
GOBP_REGULATION_OF_CHONDROCYTE_DIFFERENTIATION	GOBP_REGULATION_OF_CHONDROCYTE_DIFFERENTIATION	46	0.58749	1.93596	0	0.00119061	0.158	3566	tags=52%, list=23%, signal=67%
GOBP_REGULATION_OF_CELL_ADHESION_MEDIATED_BY_INTEGRIN	GOBP_REGULATION_OF_CELL_ADHESION_MEDIATED_BY_INTEGRIN	36	0.614414	1.93486	0	0.00119016	0.159	2497	tags=44%, list=16%, signal=53%
GOBP_TISSUE_MIGRATION	GOBP_TISSUE_MIGRATION	261	0.460838	1.93455	0	0.00118273	0.159	3050	tags=43%, list=20%, signal=52%
GOBP_VENTRAL_SPINAL_CORD_DEVELOPMENT	GOBP_VENTRAL_SPINAL_CORD_DEVELOPMENT	30	0.633026	1.93301	0	0.00117538	0.159	1860	tags=37%, list=12%, signal=42%
GOBP_REGULATION_OF_CELL_MORPHOGENESIS	GOBP_REGULATION_OF_CELL_MORPHOGENESIS	261	0.459178	1.93229	0	0.00120259	0.163	2506	tags=33%, list=16%, signal=38%
GOBP_CELLULAR_RESPONSE_TO_INORGANIC_SUBSTANCE	GOBP_CELLULAR_RESPONSE_TO_INORGANIC_SUBSTANCE	171	0.473929	1.92936	0	0.0012359	0.167	2888	tags=34%, list=19%, signal=41%
GOBP_REGULATION_OF_LYMPHOCYTE_DIFFERENTIATION	GOBP_REGULATION_OF_LYMPHOCYTE_DIFFERENTIATION	121	0.500925	1.92899	0	0.00122836	0.167	2435	tags=34%, list=16%, signal=40%
GOBP_RESPONSE_TO_BACTERIUM	GOBP_RESPONSE_TO_BACTERIUM	377	0.44324	1.92889	0	0.00123431	0.168	2253	tags=29%, list=14%, signal=34%
GOBP_MAMMARY_GLAND_DEVELOPMENT	GOBP_MAMMARY_GLAND_DEVELOPMENT	105	0.507021	1.92846	0	0.00123352	0.169	2738	tags=41%, list=18%, signal=49%
GOBP_REGULATION_OF_MACROPHAGE_ACTIVATION	GOBP_REGULATION_OF_MACROPHAGE_ACTIVATION	38	0.598795	1.927	0	0.00125272	0.172	3291	tags=53%, list=21%, signal=67%
GOBP_MUSCLE_CELL_MIGRATION	GOBP_MUSCLE_CELL_MIGRATION	71	0.540236	1.92668	0	0.00125188	0.172	1864	tags=37%, list=12%, signal=41%
GOBP_INNATE_IMMUNE_RESPONSE	GOBP_INNATE_IMMUNE_RESPONSE	484	0.4331	1.92627	0	0.00124447	0.172	3234	tags=34%, list=21%, signal=41%
GOBP_MYELOID_LEUKOCYTE_MIGRATION	GOBP_MYELOID_LEUKOCYTE_MIGRATION	131	0.489745	1.92583	0	0.00123715	0.172	2310	tags=37%, list=15%, signal=44%
GOBP_POSTSYNAPSE_ORGANIZATION	GOBP_POSTSYNAPSE_ORGANIZATION	134	0.4922	1.92529	0	0.00124301	0.174	3319	tags=40%, list=21%, signal=50%
GOCC_PLASMA_MEMBRANE_PROTEIN_COMPLEX	GOCC_PLASMA_MEMBRANE_PROTEIN_COMPLEX	363	0.445691	1.92518	0	0.00123578	0.174	2998	tags=33%, list=19%, signal=40%
GOBP_REGULATION_OF_T_CELL_DIFFERENTIATION	GOBP_REGULATION_OF_T_CELL_DIFFERENTIATION	99	0.511602	1.92244	0	0.00129273	0.184	2435	tags=35%, list=16%, signal=42%
GOBP_ESTABLISHMENT_OF_EPITHELIAL_CELL_POLARITY	GOBP_ESTABLISHMENT_OF_EPITHELIAL_CELL_POLARITY	30	0.62233	1.92235	0.00164745	0.0012853	0.184	1497	tags=40%, list=10%, signal=44%
GOBP_REGULATION_OF_HEMOPOIESIS	GOBP_REGULATION_OF_HEMOPOIESIS	263	0.453601	1.92165	0	0.00129073	0.186	2057	tags=27%, list=13%, signal=30%
GOBP_INTERFERON_BETA_PRODUCTION	GOBP_INTERFERON_BETA_PRODUCTION	50	0.572829	1.92003	0	0.00131465	0.191	3382	tags=42%, list=22%, signal=53%
GOBP_POSITIVE_REGULATION_OF_EPITHELIAL_CELL_MIGRATION	GOBP_POSITIVE_REGULATION_OF_EPITHELIAL_CELL_MIGRATION	133	0.489349	1.91897	0	0.00133249	0.194	2397	tags=37%, list=15%, signal=43%
GOBP_CELL_SUBSTRATE_ADHESION	GOBP_CELL_SUBSTRATE_ADHESION	291	0.448728	1.91673	0	0.00138739	0.203	2613	tags=36%, list=17%, signal=43%
GOBP_RESPONSE_TO_CALCIUM_ION	GOBP_RESPONSE_TO_CALCIUM_ION	109	0.501345	1.91596	0	0.00142265	0.21	3007	tags=38%, list=19%, signal=46%
GOBP_POSITIVE_REGULATION_OF_MAPK_CASCADE	GOBP_POSITIVE_REGULATION_OF_MAPK_CASCADE	323	0.448419	1.91571	0	0.00141474	0.21	3469	tags=41%, list=22%, signal=51%
GOBP_CELLULAR_EXTRAVASATION	GOBP_CELLULAR_EXTRAVASATION	49	0.574707	1.91488	0	0.001419	0.212	1763	tags=41%, list=11%, signal=46%
GOBP_POSITIVE_REGULATION_OF_INTERFERON_BETA_PRODUCTION	GOBP_POSITIVE_REGULATION_OF_INTERFERON_BETA_PRODUCTION	35	0.615135	1.91353	0	0.00143546	0.215	1194	tags=29%, list=8%, signal=31%
GOBP_POSITIVE_REGULATION_OF_INTERLEUKIN_1_PRODUCTION	GOBP_POSITIVE_REGULATION_OF_INTERLEUKIN_1_PRODUCTION	42	0.594665	1.91314	0	0.00143364	0.215	2564	tags=43%, list=16%, signal=51%
GOBP_NEURON_FATE_COMMITMENT	GOBP_NEURON_FATE_COMMITMENT	31	0.620883	1.91306	0	0.00142585	0.215	2106	tags=52%, list=14%, signal=60%
GOBP_INTERLEUKIN_12_PRODUCTION	GOBP_INTERLEUKIN_12_PRODUCTION	37	0.607832	1.91098	0	0.0014542	0.221	2556	tags=46%, list=16%, signal=55%
GOBP_GLOMERULUS_DEVELOPMENT	GOBP_GLOMERULUS_DEVELOPMENT	53	0.56341	1.91078	0	0.00145235	0.222	1978	tags=45%, list=13%, signal=52%
GOBP_ODONTOGENESIS	GOBP_ODONTOGENESIS	89	0.51822	1.91021	0	0.00146245	0.225	2209	tags=37%, list=14%, signal=43%
GOBP_CD4_POSITIVE_ALPHA_BETA_T_CELL_DIFFERENTIATION	GOBP_CD4_POSITIVE_ALPHA_BETA_T_CELL_DIFFERENTIATION	56	0.561545	1.90864	0	0.00147806	0.229	3717	tags=55%, list=24%, signal=72%
GOBP_GLAND_MORPHOGENESIS	GOBP_GLAND_MORPHOGENESIS	93	0.515168	1.90787	0	0.00148792	0.23	3004	tags=46%, list=19%, signal=57%
GOBP_NEGATIVE_REGULATION_OF_CANONICAL_WNT_SIGNALING_PATHWAY	GOBP_NEGATIVE_REGULATION_OF_CANONICAL_WNT_SIGNALING_PATHWAY	116	0.494197	1.90772	0	0.00148009	0.23	1851	tags=28%, list=12%, signal=31%
GOBP_T_CELL_ACTIVATION	GOBP_T_CELL_ACTIVATION	328	0.442634	1.90589	0	0.0014956	0.233	3547	tags=40%, list=23%, signal=50%
GOBP_NEUTROPHIL_MIGRATION	GOBP_NEUTROPHIL_MIGRATION	70	0.539237	1.90538	0	0.00149363	0.233	1762	tags=36%, list=11%, signal=40%
GOBP_POSITIVE_REGULATION_OF_INFLAMMATORY_RESPONSE	GOBP_POSITIVE_REGULATION_OF_INFLAMMATORY_RESPONSE	89	0.515999	1.90475	0	0.00151474	0.237	2931	tags=45%, list=19%, signal=55%
GOBP_VASCULOGENESIS	GOBP_VASCULOGENESIS	65	0.536816	1.90207	0	0.00157512	0.245	1618	tags=32%, list=10%, signal=36%
GOBP_KIDNEY_EPITHELIUM_DEVELOPMENT	GOBP_KIDNEY_EPITHELIUM_DEVELOPMENT	110	0.503845	1.89808	0	0.00165754	0.256	1903	tags=39%, list=12%, signal=44%
GOBP_HOMOPHILIC_CELL_ADHESION_VIA_PLASMA_MEMBRANE_ADHESION_MOLECULES	GOBP_HOMOPHILIC_CELL_ADHESION_VIA_PLASMA_MEMBRANE_ADHESION_MOLECULES	104	0.498133	1.89771	0	0.00165486	0.257	3041	tags=47%, list=19%, signal=58%
GOMF_CYTOKINE_RECEPTOR_ACTIVITY	GOMF_CYTOKINE_RECEPTOR_ACTIVITY	54	0.549953	1.89672	0	0.00170266	0.265	2351	tags=43%, list=15%, signal=50%
GOCC_EXTERNAL_SIDE_OF_PLASMA_MEMBRANE	GOCC_EXTERNAL_SIDE_OF_PLASMA_MEMBRANE	202	0.465463	1.89647	0	0.00169953	0.266	2373	tags=34%, list=15%, signal=40%
GOBP_T_CELL_DIFFERENTIATION_IN_THYMUS	GOBP_T_CELL_DIFFERENTIATION_IN_THYMUS	57	0.55264	1.89628	0	0.00169651	0.267	1716	tags=30%, list=11%, signal=33%
GOBP_NEGATIVE_REGULATION_OF_WNT_SIGNALING_PATHWAY	GOBP_NEGATIVE_REGULATION_OF_WNT_SIGNALING_PATHWAY	142	0.479624	1.89606	0	0.00169354	0.268	2855	tags=35%, list=18%, signal=42%
GOBP_REGULATION_OF_STRIATED_MUSCLE_CELL_DIFFERENTIATION	GOBP_REGULATION_OF_STRIATED_MUSCLE_CELL_DIFFERENTIATION	64	0.541014	1.89578	0	0.00169051	0.269	3730	tags=50%, list=24%, signal=65%
GOBP_CELL_MATRIX_ADHESION	GOBP_CELL_MATRIX_ADHESION	187	0.465922	1.89561	0	0.00168214	0.269	3018	tags=41%, list=19%, signal=50%
GOBP_SKIN_DEVELOPMENT	GOBP_SKIN_DEVELOPMENT	177	0.469657	1.8946	0	0.00171204	0.276	1825	tags=28%, list=12%, signal=32%
GOBP_LEUKOCYTE_CHEMOTAXIS	GOBP_LEUKOCYTE_CHEMOTAXIS	134	0.480161	1.8932	0	0.00172538	0.279	2310	tags=37%, list=15%, signal=43%
GOBP_NEGATIVE_REGULATION_OF_CYTOKINE_PRODUCTION	GOBP_NEGATIVE_REGULATION_OF_CYTOKINE_PRODUCTION	187	0.458125	1.89307	0	0.00172232	0.279	1578	tags=24%, list=10%, signal=26%
GOBP_POSITIVE_REGULATION_OF_SMOOTH_MUSCLE_CELL_PROLIFERATION	GOBP_POSITIVE_REGULATION_OF_SMOOTH_MUSCLE_CELL_PROLIFERATION	70	0.524471	1.89301	0	0.00171396	0.279	1970	tags=36%, list=13%, signal=41%
GOBP_POSITIVE_REGULATION_OF_T_CELL_PROLIFERATION	GOBP_POSITIVE_REGULATION_OF_T_CELL_PROLIFERATION	59	0.555021	1.8929	0	0.00171095	0.279	2457	tags=44%, list=16%, signal=52%
GOBP_POSITIVE_REGULATION_OF_NERVOUS_SYSTEM_DEVELOPMENT	GOBP_POSITIVE_REGULATION_OF_NERVOUS_SYSTEM_DEVELOPMENT	209	0.458572	1.8906	0	0.0017773	0.286	2453	tags=35%, list=16%, signal=41%
[truncated: 2,222 more rows]

## Sheet: GSEA GO KO
GO enrichment in phenotype: KO
[truncated: 572 more rows]

## Sheet: TF enrichment SeqDown
ChEA3: transcription factor enrichment analysis
[truncated: 299 more rows]

[truncated: 1 more sheets: TF enrichment SeqUP]
