# Supplementary material for: A YAP/TAZ–ARHGAP29–RhoA Signaling Axis Regulates Podocyte Protrusions and Integrin Adhesions
Source: Cells. 2023 Jul 6;12(13):1795. doi: 10.3390/cells12131795 (PMC10340513; doi:10.3390/cells12131795)
Supplement: Supplementary file 1 [file cells-12-01795-s001.zip › Supplementary Table S2.xlsx]

## Sheet: Proteome
Protein IDs	Majority protein IDs	Peptide counts (all)	Peptide counts (razor+unique)	Peptide counts (unique)	Protein names	Gene names	Fasta headers	Number of proteins	Peptides	Razor + unique peptides	Unique peptides	Peptides Sample_3	Peptides Sample_4	Razor + unique peptides Sample_3	Razor + unique peptides Sample_4	Unique peptides Sample_3	Unique peptides Sample_4	Sequence coverage [%]	Unique + razor sequence coverage [%]	Unique sequence coverage [%]	Mol. weight [kDa]	Sequence length	Sequence lengths	Fraction average	Fraction 1	Fraction 2	Fraction 3	Fraction 4	Fraction 5	Fraction 6	Fraction 7	Fraction 8	Fraction 9	Fraction 10	Experiment Sample_3	Experiment Sample_4	PEP	Ratio H/L	Ratio H/L normalized	Ratio H/L variability [%]	Ratio H/L count	Ratio H/L Sample_3	Ratio H/L normalized Sample_3	log2 H/L EPB41L5-KO1/WT1	Ratio H/L variability [%] Sample_3	Ratio H/L count Sample_3	Ratio H/L Sample_4	Ratio H/L normalized Sample_4	log2 L/H EPB41L5-KO2/WT2
Q09666;E9PJZ0;E9PKR9;E9PJC6;E9PLK4;Q09666-2;E9PQE3;P48552	Q09666	556;5;5;5;5;5;4;1	556;5;5;5;5;5;4;1	554;5;5;5;5;5;4;1	Neuroblast differentiation-associated protein AHNAK	AHNAK	>sp|Q09666|AHNK_HUMAN Neuroblast differentiation-associated protein AHNAK OS=Homo sapiens GN=AHNAK PE=1 SV=2	8	556	556	554	497	377	497	377	496	375	89.6	89.6	89.6	629.09	5890	5890;121;123;131;144;149;86;1158	2.37	1070	1261	730	386	155	70	35	1			2361	1347	0	1.2187	1.0079	44.792	3652	1.3422	1.1947	0.256648	39.841	2343	0.48321	0.76179	0.392535
Q15149	Q15149	383	383	4	Plectin	PLEC	>sp|Q15149|PLEC_HUMAN Plectin OS=Homo sapiens GN=PLEC PE=1 SV=3	1	383	383	4	180	328	180	328	2	3	72	72	0.9	531.78	4684	4684	1.68	533	612	115	5							321	944	0	0.79279	0.99866	25.07	1240	0.79748	1.0179	0.0255958	27.167	313	0.79112	0.99369	0.00913225
Q15149-4;Q15149-7;Q15149-8;Q15149-5;Q15149-6;Q15149-2;E9PMV1;H0YDN1;E9PKG0;E9PIA2;E9PQ28	Q15149-4;Q15149-7;Q15149-8;Q15149-5;Q15149-6;Q15149-2	382;379;379;379;379;379;32;19;8;4;3	3;0;0;0;0;0;0;0;0;0;0	3;0;0;0;0;0;0;0;0;0;0			>sp|Q15149-4|PLEC_HUMAN Isoform 4 of Plectin OS=Homo sapiens GN=PLEC;>sp|Q15149-7|PLEC_HUMAN Isoform 7 of Plectin OS=Homo sapiens GN=PLEC;>sp|Q15149-8|PLEC_HUMAN Isoform 8 of Plectin OS=Homo sapiens GN=PLEC;>sp|Q15149-5|PLEC_HUMAN Isoform 5 of Plectin OS=H	11	382	3	3	179	327	1	2	1	2	73.9	0.6	0.6	516.19	4547	4547;4515;4525;4547;4551;4574;703;200;190;174;83	1.6	2	3									1	4	0	0.74793	0.88594	15.213	5	0.82941	1.1428	0.192573	NaN	1	0.70573	0.88347	0.178747
Q15149-9	Q15149-9	380	1	1			>sp|Q15149-9|PLEC_HUMAN Isoform 9 of Plectin OS=Homo sapiens GN=PLEC	1	380	1	1	179	326	1	1	1	1	73.9	0.4	0.4	514.77	4533	4533	1.86	2	4	1								3	4	0	0.88441	1.0852	18.407	7	0.74684	1.0447	0.0630887	27.42	3	0.91427	1.1019	-0.139993
Q15149-3	Q15149-3	378	1	1			>sp|Q15149-3|PLEC_HUMAN Isoform 3 of Plectin OS=Homo sapiens GN=PLEC	1	378	1	1	178	324	1	1	1	1	72.8	0.3	0.3	518.03	4570	4570	1	2										1	1	0	1.185	1.4706	89.977	2	2.1245	2.7785	1.47431	NaN	1	0.6609	0.77836	0.361491
P35579;P35579-2;Q5BKV1;B1AH99;REV__E7EQT4;REV__Q9UKV3-5;REV__Q9UKV3	P35579;P35579-2	261;164;27;18;1;1;1	261;164;27;18;1;1;1	225;132;25;17;1;1;1	Myosin-9	MYH9	>sp|P35579|MYH9_HUMAN Myosin-9 OS=Homo sapiens GN=MYH9 PE=1 SV=4;>sp|P35579-2|MYH9_HUMAN Isoform 2 of Myosin-9 OS=Homo sapiens GN=MYH9	7	261	261	225	180	218	180	218	157	185	79.1	79.1	70.6	226.53	1960	1960;1382;218;103;1301;1328;1341	2.98	330	584	765	334	154	99	51	4		5	852	1474	0	0.5668	0.77763	44.814	2302	1.1685	1.4162	0.502025	29.293	845	0.51161	0.67231	0.572801
Q14204;H0YJ21	Q14204	250;13	250;13	250;13	Cytoplasmic dynein 1 heavy chain 1	DYNC1H1	>sp|Q14204|DYHC1_HUMAN Cytoplasmic dynein 1 heavy chain 1 OS=Homo sapiens GN=DYNC1H1 PE=1 SV=5	2	250	250	250	35	248	35	248	35	248	60.5	60.5	60.5	532.4	4646	4646;180	1.62	356	348	64	1							50	719	0	0.78894	1.003	25.579	762	0.82067	0.98999	-0.0145141	33.314	50	0.78591	1.004	-0.00575927
P21333-2;P21333;Q5HY54;E9PHF0;F8WE98;H0Y5C6;H0Y5F3;H7C2E7	P21333-2;P21333;Q5HY54	189;189;188;54;39;18;9;3	189;189;188;54;39;18;9;3	171;171;170;51;26;15;9;3	Filamin-A	FLNA	>sp|P21333-2|FLNA_HUMAN Isoform 2 of Filamin-A OS=Homo sapiens GN=FLNA;>sp|P21333|FLNA_HUMAN Filamin-A OS=Homo sapiens GN=FLNA PE=1 SV=4;>tr|Q5HY54|Q5HY54_HUMAN Filamin-A OS=Homo sapiens GN=FLNA PE=2 SV=1	8	189	189	171	141	142	141	142	130	126	75.6	75.6	72.5	280.01	2639	2639;2647;2607;780;604;281;232;90	2.46	193	451	273	108	22	16	11	3			483	594	0	0.48372	0.6869	64.661	1063	1.5752	1.7394	0.79859	30.829	478	0.3861	0.51405	0.960019
P78527;P78527-2;E7EUY0;F5GX40;H0YG84	P78527;P78527-2;E7EUY0	187;183;182;5;4	187;183;182;5;4	187;183;182;5;4	DNA-dependent protein kinase catalytic subunit	PRKDC	>sp|P78527|PRKDC_HUMAN DNA-dependent protein kinase catalytic subunit OS=Homo sapiens GN=PRKDC PE=1 SV=3;>sp|P78527-2|PRKDC_HUMAN Isoform 2 of DNA-dependent protein kinase catalytic subunit OS=Homo sapiens GN=PRKDC;>tr|E7EUY0|E7EUY0_HUMAN DNA-dependent pro	5	187	187	187	31	182	31	182	31	182	51.5	51.5	51.5	469.08	4128	4128;4097;4096;70;90	1.78	249	265	86	9	4						44	569	0	0.7526	0.98277	25.817	608	0.84562	1.0543	0.0762854	36.208	43	0.74846	0.98007	0.0290433
O75369-8	O75369-8	160	147	2			>sp|O75369-8|FLNB_HUMAN Isoform 8 of Filamin-B OS=Homo sapiens GN=FLNB	1	160	147	2	85	141	78	129	0	2	72.4	69.9	0.6	281.63	2633	2633	2.11	99	296	116	13			1			1	174	352	0	0.20786	0.27829	118.71	520	2.8563	3.0092	1.58938	36.845	172	0.18444	0.24185	2.04782
O75369-2;O75369-9;O75369;O75369-6;O75369-3;E7EN95;O75369-7;O75369-5;O75369-4;H7C5L4;Q8WXT3	O75369-2;O75369-9;O75369;O75369-6;O75369-3;E7EN95;O75369-7;O75369-5;O75369-4	159;159;159;156;156;142;142;128;128;6;2	1;1;1;1;1;1;1;1;1;0;0	1;1;1;1;1;1;1;1;1;0;0	Filamin-B	FLNB	>sp|O75369-2|FLNB_HUMAN Isoform 2 of Filamin-B OS=Homo sapiens GN=FLNB;>sp|O75369-9|FLNB_HUMAN Isoform 9 of Filamin-B OS=Homo sapiens GN=FLNB;>sp|O75369|FLNB_HUMAN Filamin-B OS=Homo sapiens GN=FLNB PE=1 SV=2;>sp|O75369-6|FLNB_HUMAN Isoform 6 of Filamin-B O	11	159	1	1	86	140	1	1	1	1	74.6	1.3	1.3	275.66	2578	2578;2591;2602;2537;2561;2409;2422;2146;2150;135;72	2		3									1	2	0	0.18233	0.22163	146.05	3	3.4597	2.5551	1.35338	NaN	1	0.16727	0.20439	2.2906
Q14315;Q14315-2	Q14315;Q14315-2	155;151	136;132	136;132	Filamin-C	FLNC	>sp|Q14315|FLNC_HUMAN Filamin-C OS=Homo sapiens GN=FLNC PE=1 SV=3;>sp|Q14315-2|FLNC_HUMAN Isoform 2 of Filamin-C OS=Homo sapiens GN=FLNC	2	155	136	136	81	137	69	120	69	120	67	61.5	61.5	291.02	2725	2725;2692	2.33	99	264	136	44	9	4	2	1			208	351	0	0.57106	0.76209	43.799	552	1.1346	1.3784	0.462995	30.95	206	0.521	0.67225	0.57293
Q13813-3	Q13813-3	144	144	1			>sp|Q13813-3|SPTN1_HUMAN Isoform 3 of Spectrin alpha chain, non-erythrocytic 1 OS=Homo sapiens GN=SPTAN1	1	144	144	1	32	141	32	141	0	1	68.6	68.6	0.7	282.28	2452	2452	2.3	30	218	110	10	2	1					66	305	0	1.2353	1.5914	46.352	368	0.52564	0.65705	-0.605925	37.908	66	1.263	1.6632	-0.733962
P35580;P35580-2;F8W6L6;P35580-3;P35580-4;E7ERA5;REV__Q5T655	P35580;P35580-2;F8W6L6;P35580-3;P35580-4	140;140;140;140;140;11;1	113;113;113;113;113;9;0	104;104;104;104;104;9;0	Myosin-10	MYH10	>sp|P35580|MYH10_HUMAN Myosin-10 OS=Homo sapiens GN=MYH10 PE=1 SV=3;>sp|P35580-2|MYH10_HUMAN Isoform 2 of Myosin-10 OS=Homo sapiens GN=MYH10;>tr|F8W6L6|F8W6L6_HUMAN Myosin-10 OS=Homo sapiens GN=MYH10 PE=2 SV=1;>sp|P35580-3|MYH10_HUMAN Isoform 3 of Myosin-1	7	140	113	104	64	128	48	104	47	95	64.6	54	50.1	229	1976	1976;1992;1992;1997;2007;188;872	2.5	35	149	186	22	1						100	293	0	0.83429	1.0664	31.296	387	0.69556	0.82069	-0.285091	27.475	97	0.86898	1.1331	-0.180275
P46821;D6RA32;D6RA40;D6RGJ3;D6RCL2	P46821	139;44;37;5;4	139;44;37;5;4	138;44;37;5;4	Microtubule-associated protein 1B;MAP1B heavy chain;MAP1 light chain LC1	MAP1B	>sp|P46821|MAP1B_HUMAN Microtubule-associated protein 1B OS=Homo sapiens GN=MAP1B PE=1 SV=2	5	139	139	138	90	107	90	107	90	106	63.3	63.3	62.9	270.63	2468	2468;670;569;122;103	1.95	189	183	44	11	4	11	9				208	243	0	0.85581	1.1018	59.63	449	0.55353	0.54493	-0.875857	30.369	208	1.1149	1.4945	-0.579663
Q9Y490;Q5TCU6	Q9Y490;Q5TCU6	134;128	134;128	121;115	Talin-1	TLN1	>sp|Q9Y490|TLN1_HUMAN Talin-1 OS=Homo sapiens GN=TLN1 PE=1 SV=3;>tr|Q5TCU6|Q5TCU6_HUMAN Talin-1 OS=Homo sapiens GN=TLN1 PE=2 SV=1	2	134	134	121	55	130	55	130	50	117	61.2	61.2	57	269.76	2541	2541;2429	2.52	56	273	187	50	15	4	3				173	415	0	0.80079	1.0173	21.235	587	0.80188	0.9525	-0.070209	23.375	173	0.8002	1.0318	-0.0451634
Q63HN8;Q63HN8-4;H3BLU6;J3QTP8;Q63HN8-5;Q63HN8-6;I3L3H9	Q63HN8;Q63HN8-4;H3BLU6	117;117;77;29;13;12;3	117;117;77;29;13;12;3	117;117;77;29;13;12;3	E3 ubiquitin-protein ligase RNF213	RNF213	>sp|Q63HN8|RN213_HUMAN E3 ubiquitin-protein ligase RNF213 OS=Homo sapiens GN=RNF213 PE=1 SV=3;>sp|Q63HN8-4|RN213_HUMAN Isoform 2 of E3 ubiquitin-protein ligase RNF213 OS=Homo sapiens GN=RNF213;>tr|H3BLU6|H3BLU6_HUMAN E3 ubiquitin-protein ligase RNF213 OS=H	7	117	117	117	13	116	13	116	13	116	28.7	28.7	28.7	591.4	5207	5207;5256;3280;1550;1063;557;106	1.29	156	65									18	203	0	1.358	1.6999	43.407	219	0.5073	0.58859	-0.764665	33.789	18	1.3662	1.7235	-0.785341
P58107	P58107	116	110	30	Epiplakin	EPPK1	>sp|P58107|EPIPL_HUMAN Epiplakin OS=Homo sapiens GN=EPPK1 PE=1 SV=2	1	116	110	30	24	111	21	105	10	28	67.9	60.5	27.3	555.61	5090	5090	1.56	138	105	18	2							34	229	0	0.37364	0.47403	57.605	262	1.5193	1.9834	0.987976	19.642	34	0.36198	0.46191	1.11432
Q01082;Q01082-2;F8W6C1;P11277-3;P11277;P11277-2;E9PJZ2;H0YJE6	Q01082;Q01082-2	113;105;28;7;7;7;1;1	113;105;28;7;7;7;1;1	8;0;0;0;0;0;0;0	Spectrin beta chain, non-erythrocytic 1	SPTBN1	>sp|Q01082|SPTB2_HUMAN Spectrin beta chain, non-erythrocytic 1 OS=Homo sapiens GN=SPTBN1 PE=1 SV=2;>sp|Q01082-2|SPTB2_HUMAN Isoform Short of Spectrin beta chain, non-erythrocytic 1 OS=Homo sapiens GN=SPTBN1	8	113	113	8	8	113	8	113	1	8	58.6	58.6	5.2	274.61	2364	2364;2168;690;2106;2137;2328;117;1028	2.15	19	170	53	1							15	228	0	1.347	1.7583	29.59	242	0.49919	0.6656	-0.587273	26.069	15	1.3585	1.7695	-0.823342
Q9NZM1-6;Q9NZM1;F8W8J4;Q9NZM1-3;C9JCN0;Q9NZM1-2;Q9NZM1-5;H0YD14;Q9NZM1-7;Q9NZM1-8;Q9NZM1-4;REV__H0YEL7;REV__P24752	Q9NZM1-6;Q9NZM1;F8W8J4;Q9NZM1-3;C9JCN0;Q9NZM1-2;Q9NZM1-5;H0YD14	110;110;109;106;106;100;81;56;28;23;11;1;1	110;110;109;106;106;100;81;56;28;23;11;1;1	108;108;107;104;104;98;79;55;27;22;11;1;1	Myoferlin	MYOF	>sp|Q9NZM1-6|MYOF_HUMAN Isoform 6 of Myoferlin OS=Homo sapiens GN=MYOF;>sp|Q9NZM1|MYOF_HUMAN Myoferlin OS=Homo sapiens GN=MYOF PE=1 SV=1;>tr|F8W8J4|F8W8J4_HUMAN Myoferlin OS=Homo sapiens GN=MYOF PE=2 SV=1;>sp|Q9NZM1-3|MYOF_HUMAN Isoform 3 of Myoferlin OS=H	13	110	110	108	21	105	21	105	21	103	60.4	60.4	59.3	233.47	2048	2048;2061;2061;2050;2051;2019;1577;1177;445;419;160;136;427	2.54	23	140	109	14	6	2	2	2			49	249	0	0.31516	0.4033	69.407	298	1.668	2.0949	1.06688	29.14	49	0.30306	0.38392	1.38112
Q03001;F8W9J4;E7ERU2;E9PEB9;J3QTQ0;E7ERU0;E9PHM6;Q03001-8;F6QMI7;Q03001-9;E7ETB9;Q6P0N6;Q03001-3;Q03001-13;Q5T0V7;Q03001-10;H0YC82;H0YAT7;E7ESK0;E7ERX3	Q03001;F8W9J4;E7ERU2;E9PEB9;J3QTQ0;E7ERU0;E9PHM6;Q03001-8	106;105;105;105;99;90;90;85;47;32;22;16;16;12;8;5;4;2;1;1	106;105;105;105;99;90;90;85;47;32;22;16;16;12;8;5;4;2;1;1	98;97;98;98;92;82;83;77;47;32;22;16;16;12;8;5;4;2;1;1	Dystonin	DST	>sp|Q03001|DYST_HUMAN Dystonin OS=Homo sapiens GN=DST PE=1 SV=4;>tr|F8W9J4|F8W9J4_HUMAN Dystonin OS=Homo sapiens GN=DST PE=2 SV=1;>tr|E7ERU2|E7ERU2_HUMAN Dystonin OS=Homo sapiens GN=DST PE=2 SV=2;>tr|E9PEB9|E9PEB9_HUMAN Dystonin OS=Homo sapiens GN=DST PE=2	20	106	106	98	2	106	2	106	2	98	20.3	20.3	18.7	860.65	7570	7570;7461;7572;7750;7246;5375;5457;5171;4200;3060;1479;1143;2649;905;689;447;448;177;133;154	1.07	119	9									2	126	0	0.69075	0.89549	26.199	127	0.54858	0.60459	-0.725971	14.221	2	0.69158	0.89864	0.154185
Q5T4S7-3;Q5T4S7;Q5T4S7-2;Q5T4S7-4;Q5T4S7-5;B4DYV5;B4DPF6;Q5T4S7-6;Q5TBN9	Q5T4S7-3;Q5T4S7;Q5T4S7-2;Q5T4S7-4	106;106;106;105;48;18;15;5;1	106;106;106;105;48;18;15;5;1	106;106;106;105;48;18;15;5;1	E3 ubiquitin-protein ligase UBR4	UBR4	>sp|Q5T4S7-3|UBR4_HUMAN Isoform 3 of E3 ubiquitin-protein ligase UBR4 OS=Homo sapiens GN=UBR4;>sp|Q5T4S7|UBR4_HUMAN E3 ubiquitin-protein ligase UBR4 OS=Homo sapiens GN=UBR4 PE=1 SV=1;>sp|Q5T4S7-2|UBR4_HUMAN Isoform 2 of E3 ubiquitin-protein ligase UBR4 OS=	9	106	106	106	10	106	10	106	10	106	28.3	28.3	28.3	571.85	5159	5159;5183;5204;5176;2456;847;706;212;258	1.21	134	36									17	153	0	0.96608	1.2084	27.34	170	0.64042	0.82445	-0.278496	26.272	17	0.97958	1.2428	-0.313594
Q01082-3	Q01082-3	106	1	1			>sp|Q01082-3|SPTB2_HUMAN Isoform 2 of Spectrin beta chain, non-erythrocytic 1 OS=Homo sapiens GN=SPTBN1	1	106	1	1	8	106	1	1	1	1	59.9	1.2	1.2	251.39	2155	2155	2.33		2	1								2	1	0	0.46533	0.62966	69.25	3	0.45706	0.61379	-0.704183	3.6092	2	1.6213	2.0351	-1.0251
Q7Z6Z7-3;Q7Z6Z7;Q7Z6Z7-2;H0Y5W0;Q5H962;H0Y659	Q7Z6Z7-3;Q7Z6Z7;Q7Z6Z7-2;H0Y5W0	94;94;93;78;31;24	94;94;93;78;31;24	91;91;90;78;28;24	E3 ubiquitin-protein ligase HUWE1	HUWE1	>sp|Q7Z6Z7-3|HUWE1_HUMAN Isoform 3 of E3 ubiquitin-protein ligase HUWE1 OS=Homo sapiens GN=HUWE1;>sp|Q7Z6Z7|HUWE1_HUMAN E3 ubiquitin-protein ligase HUWE1 OS=Homo sapiens GN=HUWE1 PE=1 SV=3;>sp|Q7Z6Z7-2|HUWE1_HUMAN Isoform 2 of E3 ubiquitin-protein ligase H	6	94	94	91	22	92	22	92	22	89	32.4	32.4	31.7	481.01	4365	4365;4374;4358;3408;1672;1197	1.38	128	59	7								39	155	0	0.89125	1.0904	30.349	194	0.65671	0.83634	-0.257839	28.092	39	0.92509	1.1299	-0.176195
Q00610-2;Q00610;J3KS13;P53675-2;P53675;K7EJJ5;J3KR87;J3KRF5;J3KSQ2;J3QL20;F5H5N6	Q00610-2;Q00610	93;93;35;16;16;15;14;9;7;5;1	93;93;35;16;16;15;14;9;7;5;1	93;93;35;16;16;15;14;9;7;5;1	Clathrin heavy chain 1	CLTC	>sp|Q00610-2|CLH1_HUMAN Isoform 2 of Clathrin heavy chain 1 OS=Homo sapiens GN=CLTC;>sp|Q00610|CLH1_HUMAN Clathrin heavy chain 1 OS=Homo sapiens GN=CLTC PE=1 SV=5	11	93	93	93	18	91	18	91	18	91	67.8	67.8	67.8	187.89	1639	1639;1675;612;1583;1640;222;1260;131;122;97;169	2.77	65	90	179	68	18	5	1				43	383	0	1.0297	1.2556	29.945	425	0.62188	0.77736	-0.363345	23.929	43	1.0436	1.2817	-0.358059
E9PPU0	E9PPU0	89	3	3		EPPK1	>tr|E9PPU0|E9PPU0_HUMAN Epiplakin OS=Homo sapiens GN=EPPK1 PE=4 SV=1	1	89	3	3	14	86	0	3	0	3	58.9	1.4	1.4	264.62	2420	2420	1.25	3	1										4	0	0.30069	0.3765	10	4	NaN	NaN	#VALUE!	NaN	0	0.30069	0.3765	1.40928
Q9P2E9;Q9P2E9-2;Q9P2E9-3;F8W7S5;A2A2S5;REV__Q9P2M7;Q8N4C6-6;F8W6D3;Q8N4C6-11;H0YDJ4;H9KV85;E9PN67;Q8N4C6-4;C9J066;Q8N4C6-9;Q8N4C6-2;Q8N4C6;Q8N4C6-5;Q8N4C6-10;Q8N4C6-7	Q9P2E9;Q9P2E9-2;Q9P2E9-3;F8W7S5	89;86;54;45;20;1;1;1;1;1;1;1;1;1;1;1;1;1;1;1	89;86;54;45;20;1;1;1;1;1;1;1;1;1;1;1;1;1;1;1	89;86;54;45;20;1;1;1;1;1;1;1;1;1;1;1;1;1;1;1	Ribosome-binding protein 1	RRBP1	>sp|Q9P2E9|RRBP1_HUMAN Ribosome-binding protein 1 OS=Homo sapiens GN=RRBP1 PE=1 SV=4;>sp|Q9P2E9-2|RRBP1_HUMAN Isoform 1 of Ribosome-binding protein 1 OS=Homo sapiens GN=RRBP1;>sp|Q9P2E9-3|RRBP1_HUMAN Isoform 2 of Ribosome-binding protein 1 OS=Homo sapiens	20	89	89	89	70	52	70	52	70	52	68	68	68	152.47	1410	1410;1407;977;751;300;1197;1275;1276;1377;1537;1581;1989;2029;2046;2052;2073;2090;2096;2116;2133	2.79	47	75	144	57	10	4	2				193	146	0	0.63163	0.78136	43.007	337	0.54626	0.62234	-0.684225	22.262	192	1.1101	1.3473	-0.430071
Q02952;Q02952-3;Q02952-2	Q02952;Q02952-3;Q02952-2	88;87;87	88;87;87	88;87;87	A-kinase anchor protein 12	AKAP12	>sp|Q02952|AKA12_HUMAN A-kinase anchor protein 12 OS=Homo sapiens GN=AKAP12 PE=1 SV=4;>sp|Q02952-3|AKA12_HUMAN Isoform 3 of A-kinase anchor protein 12 OS=Homo sapiens GN=AKAP12;>sp|Q02952-2|AKA12_HUMAN Isoform 2 of A-kinase anchor protein 12 OS=Homo sapien	3	88	88	88	52	71	52	71	52	71	61.8	61.8	61.8	191.48	1782	1782;1677;1684	1.5	118	85	9	1							96	117	0	1.0748	1.3917	76.898	211	0.45563	0.44518	-1.16754	30.384	95	1.2657	1.8251	-0.867976
P46940;H0YLE8;H0YKA5;E9PDT6;D6R939	P46940;H0YLE8	87;54;3;1;1	87;54;3;1;1	82;50;3;0;0	Ras GTPase-activating-like protein IQGAP1	IQGAP1	>sp|P46940|IQGA1_HUMAN Ras GTPase-activating-like protein IQGAP1 OS=Homo sapiens GN=IQGAP1 PE=1 SV=1;>tr|H0YLE8|H0YLE8_HUMAN Ras GTPase-activating-like protein IQGAP1 OS=Homo sapiens GN=IQGAP1 PE=2 SV=1	5	87	87	82	22	82	22	82	21	78	59.3	59.3	57.1	189.25	1657	1657;1085;43;509;825	2.76	16	73	148	30	3	1					39	232	0	0.81844	1.0114	19.365	268	0.81086	0.95629	-0.0644799	33.421	39	0.82177	1.0187	-0.0267293
P27816;E7EVA0;P27816-6;P27816-2;B9ZVR1;E9PGM5;P27816-4;B5MEG9;H0Y2V1;F8W9U4;B4DSQ1;H7C456;P27816-7	P27816;E7EVA0;P27816-6;P27816-2;B9ZVR1	83;83;82;68;43;39;36;29;22;19;17;12;4	83;83;82;68;43;39;36;29;22;19;17;12;4	41;41;40;32;1;11;11;6;4;4;4;0;0	Microtubule-associated protein 4;Microtubule-associated protein	MAP4	>sp|P27816|MAP4_HUMAN Microtubule-associated protein 4 OS=Homo sapiens GN=MAP4 PE=1 SV=3;>tr|E7EVA0|E7EVA0_HUMAN Microtubule-associated protein OS=Homo sapiens GN=MAP4 PE=2 SV=1;>sp|P27816-6|MAP4_HUMAN Isoform 6 of Microtubule-associated protein 4 OS=Homo	13	83	83	41	62	66	62	66	32	33	69.2	69.2	32.6	121	1152	1152;2297;1135;979;811;887;872;712;463;828;249;290;99	3.18	39	106	186	89	32	18	13	2			272	213	0	0.7919	0.92422	31.208	476	0.89482	1.0348	0.049352	33.808	267	0.67041	0.86174	0.214675
Q92616	Q92616	83	83	83	Translational activator GCN1	GCN1L1	>sp|Q92616|GCN1L_HUMAN Translational activator GCN1 OS=Homo sapiens GN=GCN1L1 PE=1 SV=6	1	83	83	83	3	82	3	82	3	82	41.4	41.4	41.4	292.75	2671	2671	2.29	16	101	58	5							6	174	0	0.82254	1.0239	22.45	178	0.62319	0.809	-0.305788	28.161	4	0.82724	1.0254	-0.0361868
P12270;Q5SWX9	P12270	72;2	72;2	72;2	Nucleoprotein TPR	TPR	>sp|P12270|TPR_HUMAN Nucleoprotein TPR OS=Homo sapiens GN=TPR PE=1 SV=3	2	72	72	72	21	68	21	68	21	68	36.6	36.6	36.6	267.29	2363	2363;150	1.86	55	94	24	2	1						35	141	0	0.75781	0.97701	28.872	176	0.88202	1.1024	0.140648	31.053	35	0.73771	0.94004	0.0892059
Q14152;F5H335	Q14152;F5H335	71;67	71;67	71;67	Eukaryotic translation initiation factor 3 subunit A	EIF3A	>sp|Q14152|EIF3A_HUMAN Eukaryotic translation initiation factor 3 subunit A OS=Homo sapiens GN=EIF3A PE=1 SV=1;>tr|F5H335|F5H335_HUMAN Eukaryotic translation initiation factor 3 subunit A OS=Homo sapiens GN=EIF3A PE=2 SV=1	2	71	71	71	36	52	36	52	36	52	50.4	50.4	50.4	166.57	1382	1382;1348	3.33	2	8	111	29	5	5	3				83	80	0	0.75573	0.96836	29.897	161	0.71428	0.9597	-0.0593446	20.81	82	0.80511	0.97209	0.0408382
P49327	P49327	69	69	69	Fatty acid synthase;[Acyl-carrier-protein] S-acetyltransferase;[Acyl-carrier-protein] S-malonyltransferase;3-oxoacyl-[acyl-carrier-protein] synthase;3-oxoacyl-[acyl-carrier-protein] reductase;3-hydroxyacyl-[acyl-carrier-protein] dehydratase;Enoyl-[acyl-carrier-protein] reductase;Oleoyl-[acyl-carrier-protein] hydrolase	FASN	>sp|P49327|FAS_HUMAN Fatty acid synthase OS=Homo sapiens GN=FASN PE=1 SV=3	1	69	69	69	2	69	2	69	2	69	38.9	38.9	38.9	273.42	2511	2511	2.1	20	85	32	1							2	136	0	1.0421	1.2875	24.428	137	0.64234	0.79237	-0.335754	11.576	2	1.0435	1.2912	-0.368712
Q9NZJ4;Q9NZJ4-2;H0Y6M8;B2REB0	Q9NZJ4;Q9NZJ4-2	66;54;11;6	66;54;11;6	66;54;11;6	Sacsin	SACS	>sp|Q9NZJ4|SACS_HUMAN Sacsin OS=Homo sapiens GN=SACS PE=1 SV=2;>sp|Q9NZJ4-2|SACS_HUMAN Isoform 2 of Sacsin OS=Homo sapiens GN=SACS	4	66	66	66	0	66	0	66	0	66	19.8	19.8	19.8	521.12	4579	4579;3829;732;374	1.5	65	63	1									129	0	0.48271	0.62803	15.912	126	NaN	NaN	#VALUE!	NaN	0	0.48271	0.62803	0.671095
P18206-2;P18206;Q5JQ13;B4DTM7;P18206-3	P18206-2;P18206;Q5JQ13	65;65;42;15;13	65;65;42;15;13	65;65;42;15;13	Vinculin	VCL	>sp|P18206-2|VINC_HUMAN Isoform 1 of Vinculin OS=Homo sapiens GN=VCL;>sp|P18206|VINC_HUMAN Vinculin OS=Homo sapiens GN=VCL PE=1 SV=4;>tr|Q5JQ13|Q5JQ13_HUMAN Vinculin (Fragment) OS=Homo sapiens GN=VCL PE=2 SV=1	5	65	65	65	29	57	29	57	29	57	71.1	71.1	71.1	116.72	1066	1066;1134;806;327;222	3.7	2	5	113	89	23	9	5				89	157	0	0.76248	0.91628	23.033	244	0.82316	1.0307	0.0436245	18.582	87	0.73796	0.86713	0.20568
P42704;B8ZZ38;C9JCA9;H7C3W8;Q9NP80-3;Q9NP80-2;J3KPL1;Q9NP80	P42704	62;19;16;2;1;1;1;1	62;19;16;2;1;1;1;1	62;19;16;2;1;1;1;1	Leucine-rich PPR motif-containing protein, mitochondrial	LRPPRC	>sp|P42704|LPPRC_HUMAN Leucine-rich PPR motif-containing protein, mitochondrial OS=Homo sapiens GN=LRPPRC PE=1 SV=3	8	62	62	62	7	60	7	60	7	60	51.1	51.1	51.1	157.9	1394	1394;504;359;77;682;720;720;782	3.2		1	85	20	1						13	94	0	1.0868	1.3205	28.745	107	0.6087	0.79188	-0.336646	19.644	13	1.1044	1.3441	-0.42664
Q07954;Q6PJ72;H0YJI8;Q86SW0;Q7Z7K9;E7ERG8;Q9NZR2	Q07954	58;6;4;2;2;1;1	58;6;4;2;2;1;1	58;6;4;2;2;1;1	Prolow-density lipoprotein receptor-related protein 1;Low-density lipoprotein receptor-related protein 1 85 kDa subunit;Low-density lipoprotein receptor-related protein 1 515 kDa subunit;Low-density lipoprotein receptor-related protein 1 intracellular domain	LRP1	>sp|Q07954|LRP1_HUMAN Prolow-density lipoprotein receptor-related protein 1 OS=Homo sapiens GN=LRP1 PE=1 SV=2	7	58	58	58	7	57	7	57	7	57	15.7	15.7	15.7	504.6	4544	4544;439;139;292;296;782;4599	1.5	63	32	5	3							10	93	0	0.40511	0.50706	33.822	103	1.1935	1.2422	0.312897	25.95	10	0.3986	0.49697	1.00877
P26038	P26038	58	58	47	Moesin	MSN	>sp|P26038|MOES_HUMAN Moesin OS=Homo sapiens GN=MSN PE=1 SV=3	1	58	58	47	31	51	31	51	26	40	73.8	73.8	58.6	67.819	577	577	4.5	3	3	16	128	91	27	7	1			146	130	0	0.71406	0.95734	23.666	271	0.61057	0.83576	-0.258839	20.523	143	0.98026	1.151	-0.202888
P13639;M0R0I6	P13639	57;1	57;1	56;1	Elongation factor 2	EEF2	>sp|P13639|EF2_HUMAN Elongation factor 2 OS=Homo sapiens GN=EEF2 PE=1 SV=4	2	57	57	56	29	47	29	47	29	46	63.9	63.9	62.7	95.337	858	858;85	4.15	1	2	68	127	61	20	6				82	203	0	0.95044	1.1096	20.455	282	0.68027	0.88466	-0.176805	17.671	81	1.0068	1.1597	-0.213752
P49792;J3KQ37;O14715;P0DJD0;J3QTV4;P0DJD1;F8VYC4;Q99666;Q99666-2;F8W705;H7BZ48;F8WBP7;C9J1W9;C9JF75;C9J6W1;Q7Z3J3-2	P49792	56;12;12;11;11;11;11;11;3;3;2;1;1;1;1;1	56;12;12;11;11;11;11;11;3;3;2;1;1;1;1;1	37;0;0;0;0;0;0;0;0;0;0;1;0;0;0;0	E3 SUMO-protein ligase RanBP2;Putative peptidyl-prolyl cis-trans isomerase	RANBP2	>sp|P49792|RBP2_HUMAN E3 SUMO-protein ligase RanBP2 OS=Homo sapiens GN=RANBP2 PE=1 SV=2	16	56	56	37	8	54	8	54	4	36	23.5	23.5	17	358.2	3224	3224;1625;1765;1748;1748;1756;1756;1765;904;904;202;51;134;135;152;155	1.52	58	53	3								12	102	0	0.75613	0.9937	35.008	113	0.87342	0.78004	-0.35838	30.042	12	0.75157	1.0006	-0.000865357
Q6P2Q9;I3L0J9;I3L3Z8;I3L1T8	Q6P2Q9	56;22;8;1	56;22;8;1	56;22;8;1	Pre-mRNA-processing-splicing factor 8	PRPF8	>sp|Q6P2Q9|PRP8_HUMAN Pre-mRNA-processing-splicing factor 8 OS=Homo sapiens GN=PRPF8 PE=1 SV=2	4	56	56	56	0	56	0	56	0	56	33.1	33.1	33.1	273.6	2335	2335;1013;250;116	2.31	13	63	38	2	1		1					118	0	0.92324	1.1478	15.547	117	NaN	NaN	#VALUE!	NaN	0	0.92324	1.1478	-0.198871
Q14980-2;Q14980;Q14980-4;Q14980-3;H0YFY6;Q9BTE9;F5H4J1;F5H6Y5;K4DIE0;F5H763;F5H2F3;F5H3L6;F5H0Z7;F5H1L0;F5GZW1	Q14980-2;Q14980;Q14980-4;Q14980-3;H0YFY6	54;53;40;40;29;20;15;12;7;3;2;2;2;1;1	54;53;40;40;29;20;15;12;7;3;2;2;2;1;1	54;53;40;40;29;20;15;12;7;3;2;2;2;1;1	Nuclear mitotic apparatus protein 1	NUMA1	>sp|Q14980-2|NUMA1_HUMAN Isoform 2 of Nuclear mitotic apparatus protein 1 OS=Homo sapiens GN=NUMA1;>sp|Q14980|NUMA1_HUMAN Nuclear mitotic apparatus protein 1 OS=Homo sapiens GN=NUMA1 PE=1 SV=2;>sp|Q14980-4|NUMA1_HUMAN Isoform Numa-s of Nuclear mitotic appa	15	54	54	54	29	41	29	41	29	41	33	33	33	236.51	2101	2101;2115;1763;1776;964;979;852;691;353;220;159;174;201;109;146	2.55	10	63	48	4	3	3	1				61	71	0	0.73831	0.84019	42.74	131	1.0389	1.2979	0.376179	33.226	61	0.57861	0.71687	0.480217
Q14697-2;E9PKU7;E9PNH1	Q14697-2;E9PKU7	53;45;9	1;1;1	1;1;1		GANAB	>sp|Q14697-2|GANAB_HUMAN Isoform 2 of Neutral alpha-glucosidase AB OS=Homo sapiens GN=GANAB;>tr|E9PKU7|E9PKU7_HUMAN Neutral alpha-glucosidase AB OS=Homo sapiens GN=GANAB PE=2 SV=1	3	53	1	1	22	47	1	0	1	0	67	2	2	109.44	966	966;852;119	3.5			1	1							2		0	0.71444	0.93144	12.946	2	0.71444	0.93144	-0.102465	12.946	2	NaN	NaN	#VALUE!
P78559;P78559-2;J3KPX8;E9PGC8	P78559;P78559-2;J3KPX8;E9PGC8	53;53;53;53	52;52;52;52	52;52;52;52	Microtubule-associated protein 1A;MAP1A heavy chain;MAP1 light chain LC2	MAP1A	>sp|P78559|MAP1A_HUMAN Microtubule-associated protein 1A OS=Homo sapiens GN=MAP1A PE=1 SV=6;>sp|P78559-2|MAP1A_HUMAN Isoform 2 of Microtubule-associated protein 1A OS=Homo sapiens GN=MAP1A;>tr|J3KPX8|J3KPX8_HUMAN MAP1 light chain LC2 OS=Homo sapiens GN=MAP	4	53	52	52	18	48	18	47	18	47	28.4	28.1	28.1	305.48	2803	2803;2805;2805;3041	1.47	54	32	2	2							26	64	9.6947e-291	0.38334	0.54453	62.585	90	1.5466	1.628	0.703101	34.725	26	0.35445	0.47032	1.08829
Q14697;F5H6X6;H0YFL4;E9PRF8	Q14697;F5H6X6	53;49;5;1	53;49;5;1	1;1;0;0	Neutral alpha-glucosidase AB	GANAB	>sp|Q14697|GANAB_HUMAN Neutral alpha-glucosidase AB OS=Homo sapiens GN=GANAB PE=1 SV=3;>tr|F5H6X6|F5H6X6_HUMAN Neutral alpha-glucosidase AB OS=Homo sapiens GN=GANAB PE=2 SV=1	4	53	53	1	22	48	22	48	1	1	68.8	68.8	2.2	106.87	944	944;847;163;95	3.8		3	97	103	31	6	4				66	178	0	0.74346	0.9113	20.216	242	0.81504	1.0647	0.090447	12.743	66	0.72269	0.8745	0.19347
P14618;P14618-2;P14618-3;H3BTN5;H3BQ34;Q504U3;H3BUW1;H3BTJ2;H3BT25;H3BU13;H3BN34;H3BQZ3;P30613-2;P30613	P14618;P14618-2;P14618-3;H3BTN5;H3BQ34;Q504U3	52;49;45;43;31;30;16;16;15;5;2;2;2;2	52;49;45;43;31;30;16;16;15;5;2;2;2;2	52;49;45;43;31;30;16;16;15;5;2;2;2;2	Pyruvate kinase isozymes M1/M2;Pyruvate kinase	PKM;PKM2	>sp|P14618|KPYM_HUMAN Pyruvate kinase PKM OS=Homo sapiens GN=PKM PE=1 SV=4;>sp|P14618-2|KPYM_HUMAN Isoform M1 of Pyruvate kinase PKM OS=Homo sapiens GN=PKM;>sp|P14618-3|KPYM_HUMAN Isoform 3 of Pyruvate kinase PKM OS=Homo sapiens GN=PKM;>tr|H3BTN5|H3BTN5_HU	14	52	52	52	33	48	33	48	33	48	83.4	83.4	83.4	57.936	531	531;531;516;485;281;366;162;168;151;82;52;69;543;574	4.25	48	45	48	99	142	74	28	3		3	101	389	0	0.75547	0.9237	23.505	479	0.75208	1.055	0.077243	25.211	101	0.75911	0.89445	0.160927
P08670;B0YJC4;B0YJC5;Q5JVS8;P17661;H7C5W5;P14136-3;P14136;P14136-2;P41219;P41219-2;K7EKH6;F8W835;Q16352;P07197-2;P07196;E7EMV2;E7ESP9;P07197;P12036-2;P12036	P08670;B0YJC4	51;48;20;14;5;3;3;3;3;3;3;1;1;1;1;1;1;1;1;1;1	51;48;20;14;5;3;3;3;3;3;3;1;1;1;1;1;1;1;1;1;1	47;44;18;14;3;1;1;1;1;1;1;1;1;1;1;1;1;1;1;1;1	Vimentin	VIM	>sp|P08670|VIME_HUMAN Vimentin OS=Homo sapiens GN=VIM PE=1 SV=4;>tr|B0YJC4|B0YJC4_HUMAN Vimentin OS=Homo sapiens GN=VIM PE=2 SV=1	21	51	51	47	33	42	33	42	30	39	84.5	84.5	82.6	53.651	466	466;431;228;173;470;200;431;432;438;470;471;191;207;499;540;543;698;877;916;963;1026	5.51			1	51	99	68	28	13	1	4	107	158	0	1.189	1.3503	40.441	250	0.55519	0.79032	-0.339491	14.199	99	1.325	1.5403	-0.623211
P55072;C9JUP7;C9IZA5	P55072	49;7;7	49;7;7	49;7;7	Transitional endoplasmic reticulum ATPase	VCP	>sp|P55072|TERA_HUMAN Transitional endoplasmic reticulum ATPase OS=Homo sapiens GN=VCP PE=1 SV=4	3	49	49	49	23	42	23	42	23	42	63.5	63.5	63.5	89.321	806	806;115;160	3.83	2	2	55	91	26	4					41	139	0	0.74576	0.90041	19.916	180	0.80504	1.0148	0.0211954	26.224	41	0.73994	0.872	0.1976
P08238;Q58FF7;Q5T9W8	P08238	49;23;10	49;23;10	28;10;1	Heat shock protein HSP 90-beta	HSP90AB1	>sp|P08238|HS90B_HUMAN Heat shock protein HSP 90-beta OS=Homo sapiens GN=HSP90AB1 PE=1 SV=4	3	49	49	28	23	47	23	47	15	26	62.8	62.8	44.6	83.263	724	724;597;168	4.04	7	10	58	116	59	12	5			2	69	200	0	0.90458	1.0642	28.978	267	0.68373	0.89212	-0.16469	19.78	69	0.94282	1.0961	-0.132379
P11021	P11021	49	49	48	78 kDa glucose-regulated protein	HSPA5	>sp|P11021|GRP78_HUMAN 78 kDa glucose-regulated protein OS=Homo sapiens GN=HSPA5 PE=1 SV=2	1	49	49	48	38	38	38	38	37	37	58.6	58.6	58.6	72.332	654	654	4.48			14	111	78	14	5				131	91	0	0.69137	0.91888	23.49	222	0.6187	0.84819	-0.237541	19.87	131	1.0278	1.1958	-0.257976
P07900;P07900-2;Q86U12;G3V2J8;Q58FG0;Q14568;Q58FF6;Q58FG1	P07900;P07900-2;Q86U12	49;49;34;14;7;6;5;2	32;32;21;7;4;2;0;1	32;32;21;7;4;2;0;1	Heat shock protein HSP 90-alpha	HSP90AA1	>sp|P07900|HS90A_HUMAN Heat shock protein HSP 90-alpha OS=Homo sapiens GN=HSP90AA1 PE=1 SV=5;>sp|P07900-2|HS90A_HUMAN Isoform 2 of Heat shock protein HSP 90-alpha OS=Homo sapiens GN=HSP90AA1;>tr|Q86U12|Q86U12_HUMAN Full-length cDNA clone CS0CAP007YF18 of T	8	49	32	32	15	48	8	31	8	31	54.4	40.8	40.8	84.659	732	732;854;413;174;334;343;505;418	4.02			33	59	27	4					18	105	0	1.018	1.2022	20.626	123	0.58678	0.80084	-0.320414	11.938	18	1.0254	1.2317	-0.300651
P02751-3;P02751;P02751-14;P02751-8;P02751-7;P02751-15;P02751-5;F8W7G7;P02751-17;P02751-10;P02751-6;P02751-9;P02751-13;P02751-11;P02751-4;P02751-12;H0Y7Z1;P02751-2;P02751-16;H0Y4K8	P02751-3;P02751;P02751-14;P02751-8;P02751-7;P02751-15;P02751-5;F8W7G7;P02751-17;P02751-10;P02751-6;P02751-9;P02751-13;P02751-11;P02751-4;P02751-12;H0Y7Z1	49;49;48;48;48;48;47;47;47;46;46;46;45;45;44;38;29;6;6;4	49;49;48;48;48;48;47;47;47;46;46;46;45;45;44;38;29;6;6;4	49;49;48;48;48;48;47;47;47;46;46;46;45;45;44;38;29;6;6;4	Fibronectin;Anastellin;Ugl-Y1;Ugl-Y2;Ugl-Y3	FN1	>sp|P02751-3|FINC_HUMAN Isoform 3 of Fibronectin OS=Homo sapiens GN=FN1;>sp|P02751|FINC_HUMAN Fibronectin OS=Homo sapiens GN=FN1 PE=1 SV=4;>sp|P02751-14|FINC_HUMAN Isoform 14 of Fibronectin OS=Homo sapiens GN=FN1;>sp|P02751-8|FINC_HUMAN Isoform 8 of Fibron	20	49	49	49	17	44	17	44	17	44	31	31	31	259.21	2355	2355;2386;2265;2296;2446;2477;2211;2211;2330;2176;2184;2240;2267;2386;2031;2008;1103;642;657;241	3.15	19	67	24	9	3	6	20	3			50	101	0	1.3851	1.7683	89.702	149	0.41888	0.5332	-0.907251	80.267	49	1.6054	2.0255	-1.01828
P08133;A6NN80;P08133-2;E5RK69;E7EMC6;E5RK63;E5RFF0;E5RI05;E5RJF5;E5RJR0;E5RIU8;H0YC77	P08133;A6NN80;P08133-2;E5RK69;E7EMC6	48;47;46;27;24;13;13;12;12;9;8;4	48;47;46;27;24;13;13;12;12;9;8;4	48;47;46;27;24;13;13;12;12;9;8;4	Annexin A6;Annexin	ANXA6	>sp|P08133|ANXA6_HUMAN Annexin A6 OS=Homo sapiens GN=ANXA6 PE=1 SV=3;>tr|A6NN80|A6NN80_HUMAN Annexin OS=Homo sapiens GN=ANXA6 PE=2 SV=3;>sp|P08133-2|ANXA6_HUMAN Isoform 2 of Annexin A6 OS=Homo sapiens GN=ANXA6;>tr|E5RK69|E5RK69_HUMAN Annexin OS=Homo sapien	12	48	48	48	12	47	12	47	12	47	71.5	71.5	71.5	75.872	673	673;667;641;460;330;150;156;129;130;110;94;91	4.65			1	71	72	13	2				20	139	1.4922e-278	0.67989	0.78128	24.02	156	0.92071	1.2505	0.322505	10.572	19	0.6676	0.76505	0.386374
Q9Y4G6;H0YMT1;H0YN01	Q9Y4G6;H0YMT1	47;28;6	34;22;6	34;22;6	Talin-2	TLN2	>sp|Q9Y4G6|TLN2_HUMAN Talin-2 OS=Homo sapiens GN=TLN2 PE=1 SV=4;>tr|H0YMT1|H0YMT1_HUMAN Talin-2 (Fragment) OS=Homo sapiens GN=TLN2 PE=2 SV=1	3	47	34	34	6	47	1	34	1	34	26.3	22.1	22.1	271.61	2542	2542;1471;330	2.18	1	39	4				1				1	44	0	0.42366	0.54793	29.422	45	1.3786	1.6742	0.743472	NaN	1	0.42305	0.54739	0.869359
P53621;P53621-2	P53621;P53621-2	47;47	47;47	47;47	Coatomer subunit alpha;Xenin;Proxenin	COPA	>sp|P53621|COPA_HUMAN Coatomer subunit alpha OS=Homo sapiens GN=COPA PE=1 SV=2;>sp|P53621-2|COPA_HUMAN Isoform 2 of Coatomer subunit alpha OS=Homo sapiens GN=COPA	2	47	47	47	9	45	9	45	9	45	46.6	46.6	46.6	138.34	1224	1224;1233	2.64	16	18	63	9	1						12	95	2.3299e-213	0.86763	1.0608	18.826	107	0.71614	0.86139	-0.215262	30.626	12	0.87615	1.0743	-0.103397
Q86UP2-2;Q86UP2;Q86UP2-3;G3V4Y7;B7Z6P3;G3V5G2;H0YJZ8;H0YJP2;G3V5P0;H0YJV5;C9JKX0;G8JLP4;Q9Y4F3-3;Q9Y4F3-4;Q9Y4F3-5;Q9Y4F3	Q86UP2-2;Q86UP2;Q86UP2-3	47;47;44;19;8;6;5;3;3;2;1;1;1;1;1;1	47;47;44;19;8;6;5;3;3;2;1;1;1;1;1;1	47;47;44;19;8;6;5;3;3;2;1;1;1;1;1;1	Kinectin	KTN1	>sp|Q86UP2-2|KTN1_HUMAN Isoform 2 of Kinectin OS=Homo sapiens GN=KTN1;>sp|Q86UP2|KTN1_HUMAN Kinectin OS=Homo sapiens GN=KTN1 PE=1 SV=1;>sp|Q86UP2-3|KTN1_HUMAN Isoform 3 of Kinectin OS=Homo sapiens GN=KTN1	16	47	47	47	18	41	18	41	18	41	44.7	44.7	44.7	149.61	1300	1300;1357;1306;595;334;162;153;138;160;91;1430;1577;1683;1739;1742;1742	3.17			71	4	1	1	1				26	52	7.4535e-243	1.0046	1.225	42.928	78	0.53621	0.62227	-0.684387	42.496	26	1.0539	1.2876	-0.364684
P15311;E7EQR4;E9PNP4	P15311;E7EQR4	46;43;1	36;34;0	34;32;0	Ezrin	EZR	>sp|P15311|EZRI_HUMAN Ezrin OS=Homo sapiens GN=EZR PE=1 SV=4;>tr|E7EQR4|E7EQR4_HUMAN Ezrin OS=Homo sapiens GN=EZR PE=2 SV=2	3	46	36	34	26	40	21	30	19	29	63.5	50.9	49.1	69.412	586	586;554;52	4.48	1	1	11	73	44	13	6				73	76	4.7378e-258	0.78746	0.97856	17.575	147	0.77686	1.0337	0.0478175	15.313	71	0.79868	0.93994	0.0893594
Q00341;Q00341-2;H0Y394;H7C0A4;C9JIZ1;H7C2D1;C9J5E5;H7BZC3;C9JZI8;C9JHS7;C9JHZ8;C9JES8;C9JT62;C9JK79;C9JMQ6;C9JQ82;C9JBS3;C9JEJ8;C9JKQ5;C9JHN6;C9JHS9;C9J739;H7C3D0	Q00341;Q00341-2;H0Y394	46;42;35;15;12;11;10;9;7;6;6;6;5;5;3;3;3;3;3;3;1;1;1	46;42;35;15;12;11;10;9;7;6;6;6;5;5;3;3;3;3;3;3;1;1;1	46;42;35;15;12;11;10;9;7;6;6;6;5;5;3;3;3;3;3;3;1;1;1	Vigilin	HDLBP	>sp|Q00341|VIGLN_HUMAN Vigilin OS=Homo sapiens GN=HDLBP PE=1 SV=2;>sp|Q00341-2|VIGLN_HUMAN Isoform 2 of Vigilin OS=Homo sapiens GN=HDLBP;>tr|H0Y394|H0Y394_HUMAN Vigilin (Fragment) OS=Homo sapiens GN=HDLBP PE=4 SV=1	23	46	46	46	18	39	18	39	18	39	44.7	44.7	44.7	141.45	1268	1268;1235;973;333;224;308;221;267;164;126;141;147;96;128;47;54;69;79;81;82;17;19;126	3.1			73	8							29	52	6.9301e-276	0.92308	1.1149	27.542	81	0.64078	0.74068	-0.433078	21.906	29	0.98127	1.1835	-0.24306
Q8WXH0;Q8WXH0-2;G3V5X4;Q8WXH0-7;G3V4T3;G3V3D4;Q8WXH0-3;G3V5D3;G3V5N1;Q8WXH0-9;Q8WXH0-8;Q86YP9	Q8WXH0;Q8WXH0-2;G3V5X4	46;46;41;20;8;6;3;1;1;1;1;1	46;46;41;20;8;6;3;1;1;1;1;1	44;44;39;18;8;6;1;1;1;1;1;0	Nesprin-2	SYNE2	>sp|Q8WXH0|SYNE2_HUMAN Nesprin-2 OS=Homo sapiens GN=SYNE2 PE=1 SV=3;>sp|Q8WXH0-2|SYNE2_HUMAN Isoform 2 of Nesprin-2 OS=Homo sapiens GN=SYNE2;>tr|G3V5X4|G3V5X4_HUMAN Nesprin-2 OS=Homo sapiens GN=SYNE2 PE=2 SV=1	12	46	46	44	2	45	2	45	2	43	9.4	9.4	9	796.43	6885	6885;6907;6818;3270;1113;570;855;162;214;267;285;668	1.07	50	4									4	50	8.4078e-244	1.0952	1.3409	18.492	54	0.81584	0.94187	-0.0864001	21.411	4	1.1008	1.3469	-0.429643
P11142;E9PKE3;P11142-2;E9PNE6;A8K7Q2;E9PN89;E9PLF4;E9PQQ4;E9PQK7;E9PK54;E9PPY6;E9PS65;E9PN25;E9PI65;E9PM13	P11142;E9PKE3;P11142-2;E9PNE6;A8K7Q2;E9PN89	45;43;35;33;26;25;17;16;16;16;13;13;11;11;10	44;42;34;33;26;24;16;16;16;16;13;13;11;10;10	31;29;24;23;17;16;14;14;14;14;11;9;9;8;6	Heat shock cognate 71 kDa protein	HSPA8	>sp|P11142|HSP7C_HUMAN Heat shock cognate 71 kDa protein OS=Homo sapiens GN=HSPA8 PE=1 SV=1;>tr|E9PKE3|E9PKE3_HUMAN Heat shock cognate 71 kDa protein OS=Homo sapiens GN=HSPA8 PE=2 SV=1;>sp|P11142-2|HSP7C_HUMAN Isoform 2 of Heat shock cognate 71 kDa protein	15	45	44	31	27	37	26	36	17	24	65.8	65.8	50.8	70.897	646	646;627;493;500;410;312;187;171;178;184;137;223;132;168;151	4.84			8	88	88	29	12			3	78	150	0	0.88848	1.0161	19.441	224	0.66855	0.91029	-0.135602	17.111	78	0.95151	1.0885	-0.122341
Q04637-4;Q04637-5;E9PGM1;Q04637-3;Q04637;Q04637-9;E7EX73;E7EUU4;Q04637-8;Q04637-6;Q04637-7;C9JF13;C9J6B6;C9K073;C9J2Z7;H7C044;H7C0V6;F8WCF2;C9JHW9;C9JWH7;C9J556;REV__Q8NEG2-2;C9JSU8;C9JWW9;REV__Q8NEG2;REV__F5H7J8;REV__C9JQZ6;REV__J3KQX6	Q04637-4;Q04637-5;E9PGM1;Q04637-3;Q04637;Q04637-9;E7EX73;E7EUU4;Q04637-8;Q04637-6;Q04637-7	45;44;44;44;44;44;43;43;43;42;41;17;16;12;11;10;4;2;2;1;1;1;1;1;1;1;1;1	45;44;44;44;44;44;43;43;43;42;41;17;16;12;11;10;4;2;2;1;1;1;1;1;1;1;1;1	42;41;41;41;41;41;40;40;40;39;38;15;15;12;11;9;4;2;2;1;1;1;1;1;1;1;1;1	Eukaryotic translation initiation factor 4 gamma 1	EIF4G1	>sp|Q04637-4|IF4G1_HUMAN Isoform C of Eukaryotic translation initiation factor 4 gamma 1 OS=Homo sapiens GN=EIF4G1;>sp|Q04637-5|IF4G1_HUMAN Isoform D of Eukaryotic translation initiation factor 4 gamma 1 OS=Homo sapiens GN=EIF4G1;>tr|E9PGM1|E9PGM1_HUMAN Eu	28	45	45	42	19	39	19	39	18	36	38.2	38.2	36.6	166.62	1512	1512;1435;1513;1559;1599;1606;1436;1560;1600;1403;1404;903;757;869;834;226;180;50;160;127;143;153;163;285;295;295;324;340	2.7	2	51	40	7	3	2	1				42	64	6.5352e-212	0.88392	1.1607	28.46	106	0.63389	0.75338	-0.40855	23.151	42	0.95283	1.2187	-0.285343
P14625;H0YIV0;F8W026;Q58FF3	P14625	45;6;4;3	43;6;2;3	43;6;2;3	Endoplasmin	HSP90B1	>sp|P14625|ENPL_HUMAN Endoplasmin OS=Homo sapiens GN=HSP90B1 PE=1 SV=1	4	45	43	43	18	43	17	41	17	41	55.7	53.9	53.9	92.468	803	803;147;49;399	3.84		1	52	81	22	2	1				27	132	8.3126e-293	1.2204	1.4661	31.561	157	0.54937	0.67531	-0.566378	29.596	27	1.2462	1.5049	-0.589668
Q05682-5;Q05682-4;F5H1Z9;E9PGZ1;E7EX44;Q05682-3;Q05682-6;Q05682-2;Q05682;C9J813;C9JEK3;C9JE79;F8WE61;REV__H0YH95;REV__H0YEF9;REV__E9PJZ7;REV__H0YHK3;REV__O75334-6;REV__O75334-5;REV__Q13136-2;REV__Q13136;REV__O75334-2;REV__J3KNM3;REV__O75334-4;REV__G3V200;REV__O75334-3;REV__O75334	Q05682-5;Q05682-4;F5H1Z9;E9PGZ1;E7EX44;Q05682-3;Q05682-6;Q05682-2;Q05682;C9J813	44;44;44;42;42;42;42;42;42;39;6;1;1;1;1;1;1;1;1;1;1;1;1;1;1;1;1	44;44;44;42;42;42;42;42;42;39;6;1;1;1;1;1;1;1;1;1;1;1;1;1;1;1;1	44;44;44;42;42;42;42;42;42;39;6;1;1;1;1;1;1;1;1;1;1;1;1;1;1;1;1	Caldesmon	CALD1	>sp|Q05682-5|CALD1_HUMAN Isoform 5 of Caldesmon OS=Homo sapiens GN=CALD1;>sp|Q05682-4|CALD1_HUMAN Isoform 4 of Caldesmon OS=Homo sapiens GN=CALD1;>tr|F5H1Z9|F5H1Z9_HUMAN Caldesmon OS=Homo sapiens GN=CALD1 PE=2 SV=1;>tr|E9PGZ1|E9PGZ1_HUMAN Caldesmon OS=Homo	27	44	44	44	30	34	30	34	30	34	61.8	61.8	61.8	61.212	532	532;538;543;536;557;558;563;564;793;459;132;72;85;284;387;583;1104;1152;1156;1185;1202;1232;1235;1236;1247;1251;1257	4.87			10	77	46	20	20	3		1	113	64	1.1529e-267	1.3728	1.7635	81.773	177	1.5115	2.0675	1.04789	24.943	113	0.35839	0.41896	1.25512
P07814	P07814	44	44	44	Bifunctional glutamate/proline--tRNA ligase;Glutamate--tRNA ligase;Proline--tRNA ligase	EPRS	>sp|P07814|SYEP_HUMAN Bifunctional glutamate/proline--tRNA ligase OS=Homo sapiens GN=EPRS PE=1 SV=5	1	44	44	44	14	40	14	40	14	40	38	38	38	170.59	1512	1512	3.19		2	66	10	2	1					21	60	1.6627e-218	0.87014	1.073	33.565	81	0.67633	0.80679	-0.309735	21.019	21	0.9015	1.1271	-0.172616
P15924;P15924-2	P15924;P15924-2	43;39	43;39	43;39	Desmoplakin	DSP	>sp|P15924|DESP_HUMAN Desmoplakin OS=Homo sapiens GN=DSP PE=1 SV=3;>sp|P15924-2|DESP_HUMAN Isoform DPII of Desmoplakin OS=Homo sapiens GN=DSP	2	43	43	43	1	43	1	43	1	43	19.5	19.5	19.5	331.77	2871	2871;2272	2.02	3	50	4								1	56	0	0.42855	0.52681	34.293	55	0.86946	0.8958	-0.158751	NaN	1	0.4236	0.52586	0.927249
Q709C8-4;Q709C8-2;Q709C8-3;Q709C8	Q709C8-4;Q709C8-2;Q709C8-3;Q709C8	43;43;43;43	43;43;43;43	43;43;43;43	Vacuolar protein sorting-associated protein 13C	VPS13C	>sp|Q709C8-4|VP13C_HUMAN Isoform 4 of Vacuolar protein sorting-associated protein 13C OS=Homo sapiens GN=VPS13C;>sp|Q709C8-2|VP13C_HUMAN Isoform 2 of Vacuolar protein sorting-associated protein 13C OS=Homo sapiens GN=VPS13C;>sp|Q709C8-3|VP13C_HUMAN Isoform	4	43	43	43	2	42	2	42	2	42	19.9	19.9	19.9	403.08	3585	3585;3628;3710;3753	1.37	46	27									3	70	1.0168e-280	0.58655	0.74559	20.401	72	1.0084	1.3961	0.481402	44	3	0.5864	0.74411	0.426412
P07355;P07355-2;H0YN42;H0YMD0;H0YMU9;H0YM50;A6NMY6;H0YNP5;H0YN28;H0YL33;H0YKS4;H0YMM1;H0YKZ7;H0YLV6;H0YMT9;H0YKX9;H0YNA0;H0YKL9;H0YMW4;H0YN52;H0YKV8;H0YMD9;H0YKN4;H0YNB8;H0YLE2	P07355;P07355-2;H0YN42;H0YMD0;H0YMU9;H0YM50;A6NMY6;H0YNP5;H0YN28;H0YL33;H0YKS4	42;41;37;35;35;31;28;25;24;24;23;15;13;13;13;13;12;12;12;10;10;8;6;5;3	42;41;37;35;35;31;28;25;24;24;23;15;13;13;13;13;12;12;12;10;10;8;6;5;3	42;41;37;35;35;31;28;25;24;24;23;15;13;13;13;13;12;12;12;10;10;8;6;5;3	Annexin A2;Annexin;Putative annexin A2-like protein	ANXA2;ANXA2P2	>sp|P07355|ANXA2_HUMAN Annexin A2 OS=Homo sapiens GN=ANXA2 PE=1 SV=2;>sp|P07355-2|ANXA2_HUMAN Isoform 2 of Annexin A2 OS=Homo sapiens GN=ANXA2;>tr|H0YN42|H0YN42_HUMAN Annexin (Fragment) OS=Homo sapiens GN=ANXA2 PE=2 SV=1;>tr|H0YMD0|H0YMD0_HUMAN Annexin (Fr	25	42	42	42	25	38	25	38	25	38	80.5	80.5	80.5	38.604	339	339;357;256;227;230;248;339;175;139;142;176;149;119;132;133;134;79;110;146;59;81;65;69;47;45	6.03	4	1	2	5	55	121	75	6	1	3	71	202	0	0.67488	0.73522	28.917	270	0.90082	1.2822	0.358621	12.372	70	0.64492	0.70657	0.501096
P22314;Q5JRR6;Q5JRR9;Q5JRS0;Q5JRS2;Q5JRS1;Q5JRS3	P22314	42;19;10;10;9;8;8	42;19;10;10;9;8;8	42;19;10;10;9;8;8	Ubiquitin-like modifier-activating enzyme 1	UBA1	>sp|P22314|UBA1_HUMAN Ubiquitin-like modifier-activating enzyme 1 OS=Homo sapiens GN=UBA1 PE=1 SV=3	7	42	42	42	21	37	21	37	21	37	54.8	54.8	54.8	117.85	1058	1058;506;271;284;234;173;195	3.78			65	79	26	1					41	130	0	0.62198	0.73893	31.192	171	0.96784	1.237	0.306846	13.112	41	0.59945	0.71766	0.478628
Q08211;Q08211-2	Q08211	42;7	42;7	42;7	ATP-dependent RNA helicase A	DHX9	>sp|Q08211|DHX9_HUMAN ATP-dependent RNA helicase A OS=Homo sapiens GN=DHX9 PE=1 SV=4	2	42	42	42	3	42	3	42	3	42	43.9	43.9	43.9	140.96	1270	1270;235	3.01	6	8	60	17	2						6	87	4.0713e-252	0.94789	1.1126	14.495	92	0.74781	1.0001	0.000144262	12.157	6	0.95269	1.1183	-0.161307
P06733;P06733-2;K7EM90;E5RI09;E5RG95;K7EPM1;K7EKN2;E5RGZ4	P06733;P06733-2	42;27;18;1;1;1;1;1	42;27;18;1;1;1;1;1	40;26;17;0;0;0;0;0	Alpha-enolase	ENO1	>sp|P06733|ENOA_HUMAN Alpha-enolase OS=Homo sapiens GN=ENO1 PE=1 SV=2;>sp|P06733-2|ENOA_HUMAN Isoform MBP-1 of Alpha-enolase OS=Homo sapiens GN=ENO1	8	42	42	40	24	33	24	33	23	31	83.9	83.9	74.7	47.168	434	434;341;195;148;154;196;212;283	5.64			2	29	97	76	30	5	1	7	77	170	0	1.5509	1.7337	59.164	242	0.38431	0.53565	-0.900637	36.815	77	1.6669	1.8269	-0.869398
P52272;P52272-2;M0R2T0;M0R019;M0R2I7;M0QYQ7;M0R0N3;M0R0Y6;M0QY96;M0QYL3	P52272;P52272-2	41;40;19;18;13;13;13;8;6;3	41;40;19;18;13;13;13;8;6;3	21;20;14;15;4;11;11;8;4;0	Heterogeneous nuclear ribonucleoprotein M	HNRNPM	>sp|P52272|HNRPM_HUMAN Heterogeneous nuclear ribonucleoprotein M OS=Homo sapiens GN=HNRNPM PE=1 SV=3;>sp|P52272-2|HNRPM_HUMAN Isoform 2 of Heterogeneous nuclear ribonucleoprotein M OS=Homo sapiens GN=HNRNPM	10	41	41	21	31	33	31	33	14	17	67.4	67.4	34.9	77.515	730	730;691;357;353;214;219;276;99;116;99	4.92		1	6	84	78	36	18	2	1		155	71	1.6263e-234	0.81352	1.0478	24.274	226	0.82411	1.1184	0.161436	22.789	155	0.75944	0.85034	0.233888
P07237;H7BZ94;F5H8J2;I3L312;I3NI03;I3L3U6;I3L398;H0Y3Z3;I3L3P5;I3L4M2;I3L0S0;I3L514;I3L1Y5	P07237;H7BZ94;F5H8J2	41;33;32;19;16;14;14;14;12;9;8;5;2	41;33;32;19;16;14;14;14;12;9;8;5;2	41;33;32;19;16;14;14;14;12;9;8;5;2	Protein disulfide-isomerase	P4HB	>sp|P07237|PDIA1_HUMAN Protein disulfide-isomerase OS=Homo sapiens GN=P4HB PE=1 SV=3;>tr|H7BZ94|H7BZ94_HUMAN Protein disulfide-isomerase OS=Homo sapiens GN=P4HB PE=2 SV=2;>tr|F5H8J2|F5H8J2_HUMAN Uncharacterized protein OS=Homo sapiens GN=P4HB PE=2 SV=1	13	41	41	41	17	32	17	32	17	32	67.3	67.3	67.3	57.116	508	508;464;451;236;166;188;200;274;156;117;148;106;54	5.13	2	1	6	53	79	54	14	2		3	41	173	6.7181e-288	1.3673	1.5069	36.371	214	0.47281	0.67118	-0.575228	24.602	41	1.4013	1.5532	-0.635244
Q14203-3;E7EX90;Q14203-4;Q14203-5;Q14203-6;Q14203;Q14203-2;Q6AWB1;E7EWF7;C9J1B7;C9JZA4;C9JTE5;C9JJN7;C9JJD0;C9JUI8;C9JKG6;E9PCY0	Q14203-3;E7EX90;Q14203-4;Q14203-5;Q14203-6;Q14203;Q14203-2;Q6AWB1	40;40;39;38;37;37;36;21;11;2;2;2;2;2;1;1;1	40;40;39;38;37;37;36;21;11;2;2;2;2;2;1;1;1	40;40;39;38;37;37;36;21;11;2;2;2;2;2;1;1;1	Dynactin subunit 1	DCTN1;DKFZp686E0752	>sp|Q14203-3|DCTN1_HUMAN Isoform 3 of Dynactin subunit 1 OS=Homo sapiens GN=DCTN1;>tr|E7EX90|E7EX90_HUMAN Dynactin subunit 1 OS=Homo sapiens GN=DCTN1 PE=2 SV=1;>sp|Q14203-4|DCTN1_HUMAN Isoform 4 of Dynactin subunit 1 OS=Homo sapiens GN=DCTN1;>sp|Q14203-5|D	17	40	40	40	13	36	13	36	13	36	41.5	41.5	41.5	136.82	1236	1236;1256;1253;1139;1271;1278;1144;890;191;64;76;76;87;121;14;135;186	3.05		1	59	4							18	46	3.9974e-200	0.65525	0.83642	31.592	64	0.89615	1.1072	0.146916	22.092	18	0.62027	0.76058	0.394828
P04075;J3KPS3;H3BQN4;P04075-2;H3BUH7;H3BPS8;H3BR04;H3BMQ8;H3BU78;H3BR68;Q5T7D5;P05062	P04075;J3KPS3;H3BQN4;P04075-2;H3BUH7;H3BPS8;H3BR04	40;40;37;37;26;25;20;19;14;11;1;1	40;40;37;37;26;25;20;19;14;11;1;1	38;38;35;35;25;23;19;18;13;11;0;0	Fructose-bisphosphate aldolase A;Fructose-bisphosphate aldolase	ALDOA	>sp|P04075|ALDOA_HUMAN Fructose-bisphosphate aldolase A OS=Homo sapiens GN=ALDOA PE=1 SV=2;>tr|J3KPS3|J3KPS3_HUMAN Fructose-bisphosphate aldolase OS=Homo sapiens GN=ALDOA PE=3 SV=1;>tr|H3BQN4|H3BQN4_HUMAN Fructose-bisphosphate aldolase OS=Homo sapiens GN=A	12	40	40	38	33	27	33	27	32	26	84.3	84.3	80.5	39.42	364	364;368;361;418;155;278;162;140;204;130;223;364	5.99			1	4	58	99	46	4		3	104	111	1.2505e-295	0.81458	0.96846	26.974	202	0.61661	0.87795	-0.187789	32.346	98	0.96408	1.0643	-0.0899049
Q9Y4L1;E9PL22;E9PJ21;B7Z909;J3KTF1;J3QL06;J3QQH7;J3QLE9;J3KT27;J3KSJ2;Q9BXT5	Q9Y4L1;E9PL22;E9PJ21;B7Z909	40;38;27;20;12;11;8;8;5;4;1	40;38;27;20;12;11;8;8;5;4;1	40;38;27;20;12;11;8;8;5;4;1	Hypoxia up-regulated protein 1	HYOU1	>sp|Q9Y4L1|HYOU1_HUMAN Hypoxia up-regulated protein 1 OS=Homo sapiens GN=HYOU1 PE=1 SV=1;>tr|E9PL22|E9PL22_HUMAN Hypoxia up-regulated protein 1 OS=Homo sapiens GN=HYOU1 PE=2 SV=1;>tr|E9PJ21|E9PJ21_HUMAN Hypoxia up-regulated protein 1 (Fragment) OS=Homo sap	11	40	40	40	21	33	21	33	21	33	55.5	55.5	55.5	111.33	999	999;937;656;559;224;211;149;154;103;92;2789	3.13		2	74	12	1						33	56	0	0.85095	1.0344	28.319	88	0.72208	0.83806	-0.254875	26.816	33	0.89604	1.0936	-0.129085
P36578;H3BM89;H3BU31;H3BTP7	P36578;H3BM89	40;29;17;15	40;29;17;15	40;29;17;15	60S ribosomal protein L4	RPL4	>sp|P36578|RL4_HUMAN 60S ribosomal protein L4 OS=Homo sapiens GN=RPL4 PE=1 SV=5;>tr|H3BM89|H3BM89_HUMAN 60S ribosomal protein L4 OS=Homo sapiens GN=RPL4 PE=2 SV=1	4	40	40	40	35	19	35	19	35	19	62.8	62.8	62.8	47.697	427	427;333;171;170	5.63	1	1		12	57	67	27	1			107	59	8.7484e-137	0.67267	0.92873	20.391	164	0.61265	0.88166	-0.181706	14.898	105	0.98148	1.1256	-0.170694
Q15746-5;Q15746-2;Q15746-6;Q15746;Q15746-4;Q15746-3;Q15746-7;B4DUE3;D6R9C2;Q6P2N0;Q15746-8;F8WBL7	Q15746-5;Q15746-2;Q15746-6;Q15746;Q15746-4;Q15746-3;Q15746-7	39;39;39;39;38;38;22;15;5;2;2;1	39;39;39;39;38;38;22;15;5;2;2;1	39;39;39;39;38;38;22;15;5;2;2;1	Myosin light chain kinase, smooth muscle;Myosin light chain kinase, smooth muscle, deglutamylated form	MYLK	>sp|Q15746-5|MYLK_HUMAN Isoform 4 of Myosin light chain kinase, smooth muscle OS=Homo sapiens GN=MYLK;>sp|Q15746-2|MYLK_HUMAN Isoform 2 of Myosin light chain kinase, smooth muscle OS=Homo sapiens GN=MYLK;>sp|Q15746-6|MYLK_HUMAN Isoform Del-1790 of Myosin l	12	39	39	39	14	32	14	32	14	32	23.8	23.8	23.8	202.35	1841	1841;1845;1913;1914;1794;1863;992;714;229;153;154;70	2.61	1	38	29	4	2	1					27	48	3.9594e-120	0.39125	0.50881	69.49	74	1.5616	1.8758	0.907506	39.864	26	0.35119	0.46212	1.11366
Q8WWI1-3;Q8WWI1-4;F8WD26;Q8WWI1-2;J3KP06;Q8WWI1;E9PLH4;E9PMT2;E9PMP7;H0Y424;E9PK58;E9PJ10;H0YDQ3;E9PLU6;H0YE95;E9PRE3;E9PRJ0	Q8WWI1-3;Q8WWI1-4;F8WD26;Q8WWI1-2;J3KP06;Q8WWI1;E9PLH4;E9PMT2;E9PMP7;H0Y424	39;38;38;38;38;38;35;35;28;24;8;8;7;5;4;2;2	39;38;38;38;38;38;35;35;28;24;8;8;7;5;4;2;2	1;1;1;1;1;1;0;0;1;0;0;0;0;0;0;0;0	LIM domain only protein 7	LMO7	>sp|Q8WWI1-3|LMO7_HUMAN Isoform 3 of LIM domain only protein 7 OS=Homo sapiens GN=LMO7;>sp|Q8WWI1-4|LMO7_HUMAN Isoform 4 of LIM domain only protein 7 OS=Homo sapiens GN=LMO7;>tr|F8WD26|F8WD26_HUMAN LIM domain only protein 7 OS=Homo sapiens GN=LMO7 PE=2 SV=	17	39	39	1	24	28	24	28	0	1	36.1	36.1	1.2	153.67	1349	1349;1614;1614;1670;1670;1683;1385;1398;1046;1056;166;192;292;121;176;141;165	3.35		5	56	11	4	2	2				44	36	1.2123e-198	1.0672	1.3444	64.513	79	1.4005	1.7156	0.778713	20.265	43	0.41034	0.51302	0.962913
P06753-2;P06753-3;Q5VU58;P06753-5;Q5VU59;P06753-4;Q5VU61;D6R904;Q5VU63;K7EP68;A6NL28;A6NL28-2;D6RFM2	P06753-2;P06753-3;Q5VU58;P06753-5;Q5VU59;P06753-4;Q5VU61	39;37;37;35;33;33;31;19;16;13;9;8;6	39;37;37;35;33;33;31;19;16;13;9;8;6	10;10;10;10;10;10;6;10;0;0;2;2;6		TPM3	>sp|P06753-2|TPM3_HUMAN Isoform 2 of Tropomyosin alpha-3 chain OS=Homo sapiens GN=TPM3;>sp|P06753-3|TPM3_HUMAN Isoform 3 of Tropomyosin alpha-3 chain OS=Homo sapiens GN=TPM3;>tr|Q5VU58|Q5VU58_HUMAN Tropomyosin 3, isoform CRA_b OS=Homo sapiens GN=TPM3 PE=2	13	39	39	10	12	39	12	39	4	10	76.2	76.2	17.7	29.032	248	248;247;248;248;232;247;224;95;158;138;223;210;49	6.53					18	76	72	6	3	5	42	138	2.3924e-212	0.74792	0.87653	27.556	162	0.85275	1.2261	0.294077	27.032	30	0.7301	0.83138	0.26642
Q14008-2;Q14008;Q14008-3;E9PQH5;H0YDX5;H0YCF6;H0YEK7	Q14008-2;Q14008;Q14008-3	39;39;39;5;3;1;1	39;39;39;5;3;1;1	39;39;39;5;3;1;1	Cytoskeleton-associated protein 5	CKAP5	>sp|Q14008-2|CKAP5_HUMAN Isoform 2 of Cytoskeleton-associated protein 5 OS=Homo sapiens GN=CKAP5;>sp|Q14008|CKAP5_HUMAN Cytoskeleton-associated protein 5 OS=Homo sapiens GN=CKAP5 PE=1 SV=3;>sp|Q14008-3|CKAP5_HUMAN Isoform 3 of Cytoskeleton-associated prote	7	39	39	39	9	35	9	35	9	35	26.7	26.7	26.7	218.52	1972	1972;2032;2039;151;203;167;190	2.63		31	41	3							13	62	1.7069e-166	0.69774	0.86046	28.788	75	0.88903	0.93812	-0.0921556	18.17	13	0.67583	0.85129	0.232277
Q93008-1;Q93008;O00507;O00507-2;E9PFG1	Q93008-1;Q93008	39;39;17;15;14	39;39;17;15;14	39;39;17;15;14	Probable ubiquitin carboxyl-terminal hydrolase FAF-X	USP9X	>sp|Q93008-1|USP9X_HUMAN Isoform 2 of Probable ubiquitin carboxyl-terminal hydrolase FAF-X OS=Homo sapiens GN=USP9X;>sp|Q93008|USP9X_HUMAN Probable ubiquitin carboxyl-terminal hydrolase FAF-X OS=Homo sapiens GN=USP9X PE=1 SV=3	5	39	39	39	2	37	2	37	2	37	19.5	19.5	19.5	290.46	2554	2554;2570;2555;2070;1018	1.93	9	41	5								3	52	7.0418e-185	0.72183	0.90486	48.739	55	0.95148	0.76145	-0.393179	32.019	3	0.7202	0.9058	0.142736
O75643;O75643-2;C9JAQ9;B4E0P5	O75643	39;12;12;6	39;12;12;6	39;12;12;6	U5 small nuclear ribonucleoprotein 200 kDa helicase	SNRNP200	>sp|O75643|U520_HUMAN U5 small nuclear ribonucleoprotein 200 kDa helicase OS=Homo sapiens GN=SNRNP200 PE=1 SV=2	4	39	39	39	3	37	3	37	3	37	26	26	26	244.5	2136	2136;625;625;595	2.19	15	40	31								4	82	6.7856e-275	0.85843	1.0694	25.364	86	0.75612	0.91861	-0.122476	16.737	4	0.86013	1.0752	-0.104605
E9PLY5	E9PLY5	39	39	2		MACF1	>tr|E9PLY5|E9PLY5_HUMAN Microtubule-actin cross-linking factor 1, isoforms 1/2/3/5 (Fragment) OS=Homo sapiens GN=MACF1 PE=2 SV=1	1	39	39	2	2	39	2	39	1	2	36.9	36.9	2	159.92	1375	1375	1.26	41	12	1								2	52	5.6628e-265	0.98255	1.2108	24.327	53	0.54679	0.69092	-0.533409	21.336	2	0.98359	1.2118	-0.277152
Q9Y520-4;E7EPN9;Q9Y520-5;Q9Y520;Q9Y520-7;Q9Y520-6;Q9Y520-3;Q9Y520-2;H7C5N8	Q9Y520-4;E7EPN9;Q9Y520-5;Q9Y520;Q9Y520-7;Q9Y520-6;Q9Y520-3;Q9Y520-2	39;39;39;39;39;38;37;36;11	39;39;39;39;39;38;37;36;11	38;38;38;38;38;37;36;36;11	Protein PRRC2C	PRRC2C	>sp|Q9Y520-4|PRC2C_HUMAN Isoform 4 of Protein PRRC2C OS=Homo sapiens GN=PRRC2C;>tr|E7EPN9|E7EPN9_HUMAN Protein PRRC2C OS=Homo sapiens GN=PRRC2C PE=2 SV=1;>sp|Q9Y520-5|PRC2C_HUMAN Isoform 5 of Protein PRRC2C OS=Homo sapiens GN=PRRC2C;>sp|Q9Y520|PRC2C_HUMAN	9	39	39	38	29	20	29	20	28	19	17.3	17.3	17	308.6	2817	2817;2819;2849;2896;2898;2752;2700;2653;1300	1.99	26	43	19	3							59	32	1.5479e-97	0.70038	0.87968	40.167	91	0.62868	0.76341	-0.38947	29.71	59	0.95675	1.2902	-0.367595
P10809;E7EXB4;E7ESH4;B7Z712;C9JL25;C9JCQ4;C9JL19;C9J0S9	P10809	39;16;16;8;6;4;3;1	39;16;16;8;6;4;3;1	39;16;16;8;6;4;3;1	60 kDa heat shock protein, mitochondrial	HSPD1	>sp|P10809|CH60_HUMAN 60 kDa heat shock protein, mitochondrial OS=Homo sapiens GN=HSPD1 PE=1 SV=2	8	39	39	39	20	31	20	31	20	31	71	71	71	61.054	573	573;221;234;158;175;94;83;58	4.99	1	1	5	45	81	31	12			1	69	108	0	1.2367	1.3804	40.605	177	0.54668	0.73476	-0.444655	14.282	69	1.3793	1.5323	-0.615699
P53396-2;P53396;B4E3P0;K7ESG8;K7EIE7	P53396-2;P53396;B4E3P0	39;39;31;6;3	39;39;31;6;3	39;39;31;6;3	ATP-citrate synthase	ACLY	>sp|P53396-2|ACLY_HUMAN Isoform 2 of ATP-citrate synthase OS=Homo sapiens GN=ACLY;>sp|P53396|ACLY_HUMAN ATP-citrate synthase OS=Homo sapiens GN=ACLY PE=1 SV=3;>tr|B4E3P0|B4E3P0_HUMAN ATP-citrate synthase OS=Homo sapiens GN=ACLY PE=2 SV=1	5	39	39	39	11	36	11	36	11	36	42.8	42.8	42.8	119.77	1091	1091;1101;830;109;133	3.57	1	1	60	57	8	1					25	103	1.0432e-211	2.1284	2.5085	74.238	123	0.35378	0.42806	-1.22412	28.581	24	2.185	2.601	-1.37907
Q9BSJ8;Q9BSJ8-2;F8VZB1	Q9BSJ8;Q9BSJ8-2	38;38;6	38;38;6	38;38;6	Extended synaptotagmin-1	ESYT1	>sp|Q9BSJ8|ESYT1_HUMAN Extended synaptotagmin-1 OS=Homo sapiens GN=ESYT1 PE=1 SV=1;>sp|Q9BSJ8-2|ESYT1_HUMAN Isoform 2 of Extended synaptotagmin-1 OS=Homo sapiens GN=ESYT1	3	38	38	38	11	37	11	37	11	37	44.8	44.8	44.8	122.85	1104	1104;1114;88	3.52	1		67	48	6	1	1				28	96	0	0.59569	0.7078	42.369	123	1.0047	1.3028	0.381616	33.104	27	0.5768	0.68794	0.539645
P55060-3;P55060;P55060-4;B4DUC5;P55060-2	P55060-3;P55060;P55060-4;B4DUC5	38;38;36;26;11	38;38;36;26;11	38;38;36;26;11	Exportin-2	CSE1L	>sp|P55060-3|XPO2_HUMAN Isoform 3 of Exportin-2 OS=Homo sapiens GN=CSE1L;>sp|P55060|XPO2_HUMAN Exportin-2 OS=Homo sapiens GN=CSE1L PE=1 SV=3;>sp|P55060-4|XPO2_HUMAN Isoform 4 of Exportin-2 OS=Homo sapiens GN=CSE1L;>tr|B4DUC5|B4DUC5_HUMAN Exportin-2 OS=Homo	5	38	38	38	6	38	6	38	6	38	55	55	55	107.78	945	945;971;915;754;195	3.75	1	2	57	70	17	3	1				16	135	0	0.8121	0.94032	12.005	150	0.8003	1.0141	0.0201999	14.046	16	0.81459	0.93678	0.0942178
Q9UQ35;Q9UQ35-2;I3L4D8;I3L1I8;Q9UQ35-3;I3L182;I3L1C0;I3L0N7;I3L3Q8;I3L4U6	Q9UQ35;Q9UQ35-2	38;19;6;4;4;4;3;2;2;1	38;19;6;4;4;4;3;2;2;1	38;19;6;4;4;4;3;2;2;1	Serine/arginine repetitive matrix protein 2	SRRM2	>sp|Q9UQ35|SRRM2_HUMAN Serine/arginine repetitive matrix protein 2 OS=Homo sapiens GN=SRRM2 PE=1 SV=2;>sp|Q9UQ35-2|SRRM2_HUMAN Isoform 2 of Serine/arginine repetitive matrix protein 2 OS=Homo sapiens GN=SRRM2	10	38	38	38	26	33	26	33	26	33	19.1	19.1	19.1	299.61	2752	2752;2334;1018;297;311;895;94;115;184;78	2.21	60	51	32	18	5	2	1				104	65	4.5217e-284	0.77523	1.007	23.065	168	0.71936	0.95999	-0.0589087	21.851	104	0.86099	1.053	-0.0745054
P04406;P04406-2;E7EUT5;H0Y4M7;E7EX67;H0Y6T3;O14556;O60733-4;O60733-3;O60733	P04406;P04406-2;E7EUT5	38;32;27;1;1;1;1;1;1;1	38;32;27;1;1;1;1;1;1;1	38;32;27;1;1;1;1;1;1;1	Glyceraldehyde-3-phosphate dehydrogenase	GAPDH	>sp|P04406|G3P_HUMAN Glyceraldehyde-3-phosphate dehydrogenase OS=Homo sapiens GN=GAPDH PE=1 SV=3;>sp|P04406-2|G3P_HUMAN Isoform 2 of Glyceraldehyde-3-phosphate dehydrogenase OS=Homo sapiens GN=GAPDH;>tr|E7EUT5|E7EUT5_HUMAN Glyceraldehyde-3-phosphate dehydr	10	38	38	38	24	28	24	28	24	28	99.7	99.7	99.7	36.053	335	335;293;260;124;226;229;408;427;479;806	5.98	5	4	5	7	79	170	94	5		9	79	299	0	1.0224	1.0816	20.117	378	0.59602	0.82946	-0.269756	12.856	79	1.0588	1.1262	-0.171463
P29401;P29401-2;B4E022;E9PFF2;F8W888;F8WAX4	P29401;P29401-2;B4E022;E9PFF2	37;37;33;19;8;4	37;37;33;19;8;4	37;37;33;19;8;4	Transketolase	TKT	>sp|P29401|TKT_HUMAN Transketolase OS=Homo sapiens GN=TKT PE=1 SV=3;>sp|P29401-2|TKT_HUMAN Isoform 2 of Transketolase OS=Homo sapiens GN=TKT;>tr|B4E022|B4E022_HUMAN Transketolase OS=Homo sapiens GN=TKT PE=2 SV=1;>tr|E9PFF2|E9PFF2_HUMAN Transketolase OS=Hom	6	37	37	37	24	29	24	29	24	29	59.1	59.1	59.1	67.877	623	623;631;576;334;153;81	4.83	3	1	9	65	80	34	14				77	129	0	0.43378	0.50019	70.546	205	1.3731	1.8524	0.889396	29.401	76	0.391	0.4444	1.17007
P67936;P67936-2;K7ENT6;K7ERG3;K7EMU5;K7EPV9;K7EPB9;Q2TAC2-2;Q2TAC2	P67936;P67936-2;K7ENT6	37;26;21;17;14;12;9;1;1	23;12;8;4;9;8;8;1;1	21;10;6;2;7;6;8;1;1	Tropomyosin alpha-4 chain	TPM4	>sp|P67936|TPM4_HUMAN Tropomyosin alpha-4 chain OS=Homo sapiens GN=TPM4 PE=1 SV=3;>sp|P67936-2|TPM4_HUMAN Isoform 2 of Tropomyosin alpha-4 chain OS=Homo sapiens GN=TPM4;>tr|K7ENT6|K7ENT6_HUMAN Tropomyosin alpha-4 chain (Fragment) OS=Homo sapiens GN=TPM4 PE	9	37	23	21	12	37	7	23	7	21	78.2	58.5	58.5	28.521	248	248;284;179;170;102;96;110;751;916	6.58					8	38	40	10		1	21	76	7.3055e-225	0.54247	0.61831	47.357	88	1.0911	1.5476	0.630033	41.389	16	0.53478	0.60209	0.731949
F5GWX5;Q14839;Q14839-2;K7EMY3;F5H6N4;F2Z2R5;K7EPV1;K7ESA5;I3L229;H7C3H7;H7C0J3	F5GWX5;Q14839;Q14839-2	37;37;37;8;5;2;1;1;1;1;1	37;37;37;8;5;2;1;1;1;1;1	26;26;26;0;5;0;0;0;0;0;0	Chromodomain-helicase-DNA-binding protein 4	CHD4	>tr|F5GWX5|F5GWX5_HUMAN Chromodomain-helicase-DNA-binding protein 4 OS=Homo sapiens GN=CHD4 PE=2 SV=1;>sp|Q14839|CHD4_HUMAN Chromodomain-helicase-DNA-binding protein 4 OS=Homo sapiens GN=CHD4 PE=1 SV=2;>sp|Q14839-2|CHD4_HUMAN Isoform 2 of Chromodomain-heli	11	37	37	26	3	36	3	36	2	25	23.1	23.1	16.6	217.1	1905	1905;1912;1940;1060;354;1225;63;127;250;277;383	1.97	7	49	5								5	56	1.4539e-219	0.82603	1.0687	28.334	59	0.77793	1.0862	0.11929	27.649	5	0.82639	1.0671	-0.0936954
Q8IVF2-3;Q8IVF2;Q8IVF2-2	Q8IVF2-3;Q8IVF2	37;37;2	35;35;2	35;35;2	Protein AHNAK2	AHNAK2	>sp|Q8IVF2-3|AHNK2_HUMAN Isoform 3 of Protein AHNAK2 OS=Homo sapiens GN=AHNAK2;>sp|Q8IVF2|AHNK2_HUMAN Protein AHNAK2 OS=Homo sapiens GN=AHNAK2 PE=1 SV=2	3	37	35	35	15	29	14	27	14	27	24.1	23.9	23.9	605.64	5695	5695;5795;793	1.34	34	15	1								21	29	1.4619e-150	0.9294	1.145	61.63	48	0.52719	0.47761	-1.0661	46.594	19	0.98287	1.3358	-0.417704
F8VPD4;P27708;H7C2E4;H7C3Z5;H7BZB3	F8VPD4;P27708	37;37;6;4;1	37;37;6;4;1	37;37;6;4;1	CAD protein;Glutamine-dependent carbamoyl-phosphate synthase;Aspartate carbamoyltransferase;Dihydroorotase	CAD	>tr|F8VPD4|F8VPD4_HUMAN DNA fragmentation factor subunit beta OS=Homo sapiens GN=CAD PE=2 SV=1;>sp|P27708|PYR1_HUMAN CAD protein OS=Homo sapiens GN=CAD PE=1 SV=3	5	37	37	37	4	35	4	35	4	35	25.7	25.7	25.7	236.02	2162	2162;2225;293;269;280	2.1	21	42	21	1	1	1					6	81	3.269e-221	1.252	1.5352	48.154	85	0.5241	0.59464	-0.749912	69.308	6	1.2605	1.5505	-0.632734
P42224;P42224-2;J3KPM9;E7EPD2;D2KFR9;E7ENM1;E9PH66;H7BZB5;H7BZ88	P42224;P42224-2;J3KPM9	37;35;34;10;10;9;5;2;1	37;35;34;10;10;9;5;2;1	37;35;34;10;10;9;5;2;1	Signal transducer and activator of transcription 1-alpha/beta	STAT1	>sp|P42224|STAT1_HUMAN Signal transducer and activator of transcription 1-alpha/beta OS=Homo sapiens GN=STAT1 PE=1 SV=2;>sp|P42224-2|STAT1_HUMAN Isoform Beta of Signal transducer and activator of transcription 1-alpha/beta OS=Homo sapiens GN=STAT1;>tr|J3KP	9	37	37	37	5	37	5	37	5	37	51.9	51.9	51.9	87.334	750	750;712;714;180;193;150;70;58;40	4.1			7	57	15						12	67	1.7497e-254	2.2868	2.686	74.377	79	0.2985	0.38473	-1.37808	20.632	12	2.3925	2.783	-1.47664
P11586;G3V2B8;F5H2F4;G3V3L6	P11586;G3V2B8;F5H2F4;G3V3L6	36;35;33;22	36;35;33;22	36;35;33;22	C-1-tetrahydrofolate synthase, cytoplasmic;Methylenetetrahydrofolate dehydrogenase;Methenyltetrahydrofolate cyclohydrolase;Formyltetrahydrofolate synthetase	MTHFD1	>sp|P11586|C1TC_HUMAN C-1-tetrahydrofolate synthase, cytoplasmic OS=Homo sapiens GN=MTHFD1 PE=1 SV=3;>tr|G3V2B8|G3V2B8_HUMAN C-1-tetrahydrofolate synthase, cytoplasmic OS=Homo sapiens GN=MTHFD1 PE=2 SV=1;>tr|F5H2F4|F5H2F4_HUMAN C-1-tetrahydrofolate synthas	4	36	36	36	20	27	20	27	20	27	48.1	48.1	48.1	101.56	935	935;935;1020;634	3.89			27	52	6	4	1				35	55	6.3885e-165	1.2332	1.4144	49.071	90	0.4827	0.60662	-0.721135	19.191	35	1.399	1.6344	-0.708761
Q14764;H3BQK6;H3BRL2;H3BUK7;H3BNF6;H3BP76;H3BNF2;H3BUP3;H3BQE7;H3BPZ2	Q14764	35;9;8;6;6;5;3;3;3;2	35;9;8;6;6;5;3;3;3;2	35;9;8;6;6;5;3;3;3;2	Major vault protein	MVP	>sp|Q14764|MVP_HUMAN Major vault protein OS=Homo sapiens GN=MVP PE=1 SV=4	10	35	35	35	19	30	19	30	19	30	54.2	54.2	54.2	99.326	893	893;220;149;107;144;94;42;57;81;39	3.7			49	61	8	1	1				43	77	1.4166e-207	0.73538	0.8873	20.456	119	0.83111	1.0479	0.067501	15.241	42	0.71408	0.82856	0.271322
P41252;J3KR24;Q5TCC5;Q5TCC4;Q5TCD2;Q5TCD1;Q5TCC6;Q5TCC9	P41252;J3KR24	35;33;7;7;6;6;2;1	35;33;7;7;6;6;2;1	35;33;7;7;6;6;2;1	Isoleucine--tRNA ligase, cytoplasmic	IARS	>sp|P41252|SYIC_HUMAN Isoleucine--tRNA ligase, cytoplasmic OS=Homo sapiens GN=IARS PE=1 SV=2;>tr|J3KR24|J3KR24_HUMAN Isoleucine--tRNA ligase, cytoplasmic OS=Homo sapiens GN=IARS PE=4 SV=1	8	35	35	35	3	34	3	34	3	34	36.4	36.4	36.4	144.5	1262	1262;1152;170;249;229;330;174;72	3.04			45	2							3	44	4.8445e-188	0.77202	0.93939	14.978	45	0.83733	1.0748	0.104068	25.923	3	0.76903	0.93608	0.0952963
P25705;P25705-2;K7ENP3;K7EK77;K7ENJ4;K7ERX7;K7EJP1;K7EQH4;K7ESA0	P25705;P25705-2;K7ENP3;K7EK77	35;34;31;19;15;15;13;7;2	35;34;31;19;15;15;13;7;2	35;34;31;19;15;15;13;7;2	ATP synthase subunit alpha, mitochondrial;ATP synthase subunit alpha	ATP5A1	>sp|P25705|ATPA_HUMAN ATP synthase subunit alpha, mitochondrial OS=Homo sapiens GN=ATP5A1 PE=1 SV=1;>sp|P25705-2|ATPA_HUMAN Isoform 2 of ATP synthase subunit alpha, mitochondrial OS=Homo sapiens GN=ATP5A1;>tr|K7ENP3|K7ENP3_HUMAN ATP synthase subunit alpha	9	35	35	35	19	31	19	31	19	31	61.5	61.5	61.5	59.75	553	553;503;531;207;199;205;145;111;77	5.33			2	22	58	49	12				50	93	3.9699e-280	0.88732	1.0121	21.633	138	0.64137	0.91737	-0.124424	24.289	48	0.93809	1.0514	-0.0723116
Q9NYU2-2;Q9NYU2;H7BZG0	Q9NYU2-2;Q9NYU2	35;35;2	35;35;2	35;35;2	UDP-glucose:glycoprotein glucosyltransferase 1	UGGT1	>sp|Q9NYU2-2|UGGG1_HUMAN Isoform 2 of UDP-glucose:glycoprotein glucosyltransferase 1 OS=Homo sapiens GN=UGGT1;>sp|Q9NYU2|UGGG1_HUMAN UDP-glucose:glycoprotein glucosyltransferase 1 OS=Homo sapiens GN=UGGT1 PE=1 SV=3	3	35	35	35	2	34	2	34	2	34	37.6	37.6	37.6	174.97	1531	1531;1555;131	2.89		11	46	4							3	58	1.3687e-303	0.97105	1.1537	16.656	61	0.65492	0.79616	-0.32887	3.1909	3	0.97366	1.1597	-0.213752
P13010;C9JZ81;H7C0H9	P13010	34;7;2	34;7;2	34;7;2	X-ray repair cross-complementing protein 5	XRCC5	>sp|P13010|XRCC5_HUMAN X-ray repair cross-complementing protein 5 OS=Homo sapiens GN=XRCC5 PE=1 SV=3	3	34	34	34	5	33	5	33	5	33	57.8	57.8	57.8	82.704	732	732;131;19	4.24			16	64	24	5	3				29	83	2.529e-283	0.72666	0.84024	22.445	111	0.95528	1.2284	0.29678	12.695	29	0.69053	0.80773	0.308055
Q9UHD8;Q9UHD8-7;Q9UHD8-2;Q9UHD8-3;Q9UHD8-4;Q9UHD8-9;Q9UHD8-8;K7ENL0;K7EL40;K7EK18;K7EJV0;K7ER52;K7EPY1;K7EIE4;K7EQD7;K7ELJ9;K7EJZ2;K7ER14;K7EIR4;K7EKN4;K7EN52;K7ENQ5;K7EJ51;K7EJL9;K7EQ08;K7ER34;K7ERG1	Q9UHD8;Q9UHD8-7;Q9UHD8-2;Q9UHD8-3	34;32;32;19;14;14;14;13;12;11;10;10;10;10;10;9;8;8;7;7;7;7;7;7;5;3;2	34;32;32;19;14;14;14;13;12;11;10;10;10;10;10;9;8;8;7;7;7;7;7;7;5;3;2	2;0;0;0;0;0;0;0;0;0;0;0;0;0;0;0;0;0;0;0;0;0;0;0;0;0;0	Septin-9	2016-09-09	>sp|Q9UHD8|SEPT9_HUMAN Septin-9 OS=Homo sapiens GN=SEPT9 PE=1 SV=2;>sp|Q9UHD8-7|SEPT9_HUMAN Isoform 7 of Septin-9 OS=Homo sapiens GN=SEPT9;>sp|Q9UHD8-2|SEPT9_HUMAN Isoform 2 of Septin-9 OS=Homo sapiens GN=SEPT9;>sp|Q9UHD8-3|SEPT9_HUMAN Isoform 3 of Septin-	27	34	34	2	26	22	26	22	2	0	58.9	58.9	2	65.401	586	586;567;568;422;335;362;474;152;209;195;125;151;151;157;165;144;135;159;104;108;116;124;134;189;57;90;35	4.97			4	53	58	33	12				109	51	8.9352e-168	0.68972	0.94187	18.052	158	0.6695	0.9438	-0.0834469	17.231	108	0.80423	0.92024	0.119918
Q86VP6;Q86VP6-2;H0YH27;Q86VP6-3;O75155-2;O75155;F5H6I6;F8WBB8	Q86VP6;Q86VP6-2	34;31;5;4;2;2;1;1	34;31;5;4;2;2;1;1	34;31;5;4;2;2;1;1	Cullin-associated NEDD8-dissociated protein 1	CAND1	>sp|Q86VP6|CAND1_HUMAN Cullin-associated NEDD8-dissociated protein 1 OS=Homo sapiens GN=CAND1 PE=1 SV=2;>sp|Q86VP6-2|CAND1_HUMAN Isoform 2 of Cullin-associated NEDD8-dissociated protein 1 OS=Homo sapiens GN=CAND1	8	34	34	34	3	34	3	34	3	34	38.1	38.1	38.1	136.37	1230	1230;1062;442;403;1119;1236;54;110	3.48	1	1	48	35	4	1					9	81	1.2942e-254	0.80535	0.96566	15.01	90	0.78971	0.9738	-0.0383026	8.8527	9	0.80564	0.9652	0.0511002
P63261;I3L3I0;I3L1U9;I3L3R2;I3L4N8;J3KT65;K7EM38	P63261;I3L3I0;I3L1U9	34;18;18;14;14;12;11	1;1;1;1;1;1;1	1;1;1;1;1;1;1	Actin, cytoplasmic 2;Actin, cytoplasmic 2, N-terminally processed	ACTG1	>sp|P63261|ACTG_HUMAN Actin, cytoplasmic 2 OS=Homo sapiens GN=ACTG1 PE=1 SV=1;>tr|I3L3I0|I3L3I0_HUMAN Actin, cytoplasmic 2, N-terminally processed (Fragment) OS=Homo sapiens GN=ACTG1 PE=2 SV=1;>tr|I3L1U9|I3L1U9_HUMAN Actin, cytoplasmic 2, N-terminally proc	7	34	1	1	19	29	1	1	1	1	89.6	4.5	4.5	41.792	375	375;214;214;164;242;198;133	5.69	1	1	1	2	8	7	5	2	2		23	6	0	0.6086	0.82236	29.554	29	0.59334	0.80125	-0.319676	10.595	23	1.3879	1.4934	-0.578601
Q15075	Q15075	33	33	33	Early endosome antigen 1	EEA1	>sp|Q15075|EEA1_HUMAN Early endosome antigen 1 OS=Homo sapiens GN=EEA1 PE=1 SV=2	1	33	33	33	7	31	7	31	7	31	28.8	28.8	28.8	162.46	1411	1411	3.06	1	1	46	4	1						9	44	2.7704e-226	0.56377	0.67443	30.739	52	1.0836	1.2688	0.343465	23.332	9	0.5361	0.66854	0.580914
P35241;P35241-5;P35241-4;H0YE16;P35241-2;P35241-3;E9PQ82;E9PNV3;E9PKN5	P35241;P35241-5;P35241-4	33;32;26;13;12;8;6;6;1	20;19;18;13;12;4;2;2;1	20;19;18;13;12;4;2;2;1	Radixin	RDX	>sp|P35241|RADI_HUMAN Radixin OS=Homo sapiens GN=RDX PE=1 SV=1;>sp|P35241-5|RADI_HUMAN Isoform 5 of Radixin OS=Homo sapiens GN=RDX;>sp|P35241-4|RADI_HUMAN Isoform 4 of Radixin OS=Homo sapiens GN=RDX	9	33	20	20	20	24	13	12	13	12	45.5	28.6	28.6	68.563	583	583;604;447;253;257;200;116;148;51	4.57			1	34	17	6	2				42	18	8.6536e-172	0.87518	1.1469	23.647	59	0.90876	1.2014	0.264717	10.405	42	0.64134	0.75419	0.407
B1AHC9;P12956;B1AHC8;F5H1I8	B1AHC9;P12956;B1AHC8;F5H1I8	33;33;31;28	33;33;31;28	33;33;31;28	X-ray repair cross-complementing protein 6	XRCC6	>tr|B1AHC9|B1AHC9_HUMAN X-ray repair cross-complementing protein 6 OS=Homo sapiens GN=XRCC6 PE=2 SV=1;>sp|P12956|XRCC6_HUMAN X-ray repair cross-complementing protein 6 OS=Homo sapiens GN=XRCC6 PE=1 SV=2;>tr|B1AHC8|B1AHC8_HUMAN X-ray repair complementing de	4	33	33	33	13	28	13	28	13	28	55.3	55.3	55.3	64.283	559	559;609;568;476	4.62		1	3	51	48	10	3				33	83	1.1066e-163	0.69644	0.81078	26.023	116	0.91949	1.2074	0.271904	23.747	33	0.66541	0.77554	0.366727
P33176;E9PET8;O60282;J3KNA1;Q12840;O60282-2	P33176	33;9;9;7;7;6	33;9;9;7;7;6	33;9;9;7;7;6	Kinesin-1 heavy chain	KIF5B	>sp|P33176|KINH_HUMAN Kinesin-1 heavy chain OS=Homo sapiens GN=KIF5B PE=1 SV=1	6	33	33	33	14	25	14	25	14	25	41.5	41.5	41.5	109.68	963	963;862;957;943;1032;725	3.48	1	1	42	37	3						29	55	4.7443e-189	0.75689	0.89238	21.365	83	0.83066	1.0193	0.0275787	28.325	29	0.71126	0.87401	0.194278
Q71U36-2;Q71U36;Q13748;Q13748-2;F8VQQ4;Q6PEY2	Q71U36-2;Q71U36;Q13748;Q13748-2;F8VQQ4	33;33;24;20;19;16	33;33;24;20;19;16	1;1;1;1;1;1	Tubulin alpha-1A chain;Tubulin alpha-3C/D chain	TUBA1A;TUBA3C	>sp|Q71U36-2|TBA1A_HUMAN Isoform 2 of Tubulin alpha-1A chain OS=Homo sapiens GN=TUBA1A;>sp|Q71U36|TBA1A_HUMAN Tubulin alpha-1A chain OS=Homo sapiens GN=TUBA1A PE=1 SV=1;>sp|Q13748|TBA3C_HUMAN Tubulin alpha-3C/D chain OS=Homo sapiens GN=TUBA3C PE=1 SV=3;>sp	6	33	33	1	16	29	16	29	0	1	77.2	77.2	3.4	46.297	416	416;451;450;418;219;450	5.22	8	8	17	51	99	58	40	10	1	7	95	204	0	0.85511	1.0042	16.485	298	0.72212	0.99392	-0.00879836	16.345	95	0.89662	1.0091	-0.0130692
Q9BQE3;F5H5D3;F8VVB9;F8VRZ4;F8VS66;F8VWV9;F8VX09;A6NHL2-2;A6NHL2;C9K0S6;F8VRK0;F8W0F6;F8VXZ7;Q9H853	Q9BQE3;F5H5D3;F8VVB9	33;33;17;12;12;9;8;4;4;3;3;2;1;1	3;3;1;0;0;0;0;0;0;0;0;0;0;1	2;2;0;0;0;0;0;0;0;0;0;0;0;0	Tubulin alpha-1C chain	TUBA1C;TUBA1B	>sp|Q9BQE3|TBA1C_HUMAN Tubulin alpha-1C chain OS=Homo sapiens GN=TUBA1C PE=1 SV=1;>tr|F5H5D3|F5H5D3_HUMAN Tubulin alpha-1C chain OS=Homo sapiens GN=TUBA1C PE=2 SV=1;>tr|F8VVB9|F8VVB9_HUMAN Tubulin alpha-1B chain (Fragment) OS=Homo sapiens GN=TUBA1B PE=2 SV	14	33	3	2	16	29	1	3	0	2	71.5	12.2	9.1	49.895	449	449;519;247;112;130;81;75;406;446;47;49;231;26;241	4.51	2	2	2	9	15	5	2				4	33	0	0.9538	1.058	18.07	33	0.56547	0.7354	-0.443399	30.492	4	0.97044	1.0787	-0.109294
Q9UHD8-5	Q9UHD8-5	33	1	1			>sp|Q9UHD8-5|SEPT9_HUMAN Isoform 5 of Septin-9 OS=Homo sapiens GN=SEPT9	1	33	1	1	25	23	1	1	1	1	61.1	3.6	3.6	64.681	579	579	4.4				3	2						4	1	2.5092e-168	0.43118	0.61026	30.326	5	0.41317	0.58114	-0.783042	11.309	4	0.87827	1.0832	-0.1153
F5H6E2;O00159-3;O00159;I3L501	F5H6E2;O00159-3;O00159	33;33;33;4	33;33;33;4	1;1;1;1	Unconventional myosin-Ic	MYO1C	>tr|F5H6E2|F5H6E2_HUMAN Unconventional myosin-Ic OS=Homo sapiens GN=MYO1C PE=2 SV=1;>sp|O00159-3|MYO1C_HUMAN Isoform 3 of Unconventional myosin-Ic OS=Homo sapiens GN=MYO1C;>sp|O00159|MYO1C_HUMAN Unconventional myosin-Ic OS=Homo sapiens GN=MYO1C PE=1 SV=4	4	33	33	1	11	29	11	29	0	1	35.7	35.7	1	118.99	1039	1039;1044;1063;169	3.66			40	45	8						22	71	8.4604e-209	1.0006	1.1432	27.205	93	0.61546	0.76142	-0.393236	22.647	22	1.0246	1.1963	-0.258579
P13667;C9JMN9	P13667	33;1	33;1	33;1	Protein disulfide-isomerase A4	PDIA4	>sp|P13667|PDIA4_HUMAN Protein disulfide-isomerase A4 OS=Homo sapiens GN=PDIA4 PE=1 SV=2	2	33	33	33	18	28	18	28	18	28	44.7	44.7	44.7	72.932	645	645;163	4.49			1	52	31	4	2				42	48	4.4449e-159	0.95445	1.0974	31.615	88	0.54851	0.76119	-0.393671	14.4	41	1.1744	1.3741	-0.458487
P06396-2;F5H1A8;P06396-3;P06396;Q5T0H9;CON__Q3SX14;Q5T0I0;Q5T0H8;Q5T0H7;Q5T0I1;REV__F5H555;REV__H0YJM7;REV__Q6TDU7-4;REV__Q6TDU7-2;REV__Q6TDU7-3;REV__Q6TDU7;REV__F8W8F9	P06396-2;F5H1A8;P06396-3;P06396;Q5T0H9	32;30;30;30;18;13;11;10;9;6;1;1;1;1;1;1;1	32;30;30;30;18;13;11;10;9;6;1;1;1;1;1;1;1	32;30;30;30;18;13;11;10;9;6;1;1;1;1;1;1;1	Gelsolin	GSN	>sp|P06396-2|GELS_HUMAN Isoform 2 of Gelsolin OS=Homo sapiens GN=GSN;>tr|F5H1A8|F5H1A8_HUMAN Gelsolin OS=Homo sapiens GN=GSN PE=2 SV=1;>sp|P06396-3|GELS_HUMAN Isoform 3 of Gelsolin OS=Homo sapiens GN=GSN;>sp|P06396|GELS_HUMAN Gelsolin OS=Homo sapiens GN=GS	17	32	32	32	18	26	18	26	18	26	52.3	52.3	52.3	80.64	731	731;739;742;782;485;781;260;207;188;228;514;548;657;676;690;716;722	4.33			17	60	25	9	4				57	58	9.8172e-274	0.61328	0.7809	56.924	115	1.2363	1.5335	0.616828	22.374	57	0.45603	0.53436	0.904116
Q01813;Q01813-2;B1APP6;B1APP8;H0Y757;Q5VSR5;H0Y3Y3;Q5VSR6;P08237-2	Q01813;Q01813-2	32;28;11;9;6;5;4;3;1	32;28;11;9;6;5;4;3;1	30;27;11;9;6;4;4;3;0	6-phosphofructokinase type C	PFKP	>sp|Q01813|K6PP_HUMAN 6-phosphofructokinase type C OS=Homo sapiens GN=PFKP PE=1 SV=2;>sp|Q01813-2|K6PP_HUMAN Isoform 2 of 6-phosphofructokinase type C OS=Homo sapiens GN=PFKP	9	32	32	30	10	30	10	30	9	28	42.6	42.6	39	85.595	784	784;776;240;202;103;210;166;166;749	4.09	3	3	17	57	26	5	2				32	81	0	0.59578	0.69665	35.975	110	1.0949	1.4456	0.531668	13.54	30	0.57647	0.668	0.58208
J3KN67;P06753	J3KN67;P06753	32;26	3;3	1;1	Tropomyosin alpha-3 chain	TPM3	>tr|J3KN67|J3KN67_HUMAN Tropomyosin alpha-3 chain OS=Homo sapiens GN=TPM3 PE=3 SV=1;>sp|P06753|TPM3_HUMAN Tropomyosin alpha-3 chain OS=Homo sapiens GN=TPM3 PE=1 SV=2	2	32	3	1	9	32	1	3	0	1	67.7	16.5	4.6	33.222	285	285;285	6.33					1	7	3	1			3	9	2.5511e-154	0.60761	0.68972	38.766	12	1.0782	1.529	0.612588	7.83	3	0.57488	0.67667	0.563476
Q13428-3;Q13428-8;Q13428;Q13428-4;E9PHK9;Q13428-2;Q13428-7;E7ETY2;J3KQ96;Q13428-6;Q13428-5;H0YA99;H0YAB7	Q13428-3;Q13428-8;Q13428;Q13428-4;E9PHK9;Q13428-2;Q13428-7;E7ETY2;J3KQ96;Q13428-6;Q13428-5	32;31;31;31;31;30;29;29;28;28;20;4;1	32;31;31;31;31;30;29;29;28;28;20;4;1	32;31;31;31;31;30;29;29;28;28;20;4;1	Treacle protein	TCOF1	>sp|Q13428-3|TCOF_HUMAN Isoform 3 of Treacle protein OS=Homo sapiens GN=TCOF1;>sp|Q13428-8|TCOF_HUMAN Isoform 8 of Treacle protein OS=Homo sapiens GN=TCOF1;>sp|Q13428|TCOF_HUMAN Treacle protein OS=Homo sapiens GN=TCOF1 PE=1 SV=3;>sp|Q13428-4|TCOF_HUMAN Iso	13	32	32	32	22	26	22	26	22	26	25.7	25.7	25.7	152.2	1489	1489;1412;1488;1524;1525;1411;1451;1488;1414;1450;958;188;148	2.84	12	43	31	18	7	3	2				77	39	4.4315e-140	0.86342	0.91456	34.072	116	0.96651	1.0945	0.130272	34.478	77	0.61226	0.77437	0.368905
F5H698;B4DER1;Q9P2J5;B4DJ10	F5H698;B4DER1;Q9P2J5;B4DJ10	32;32;32;31	32;32;32;31	32;32;32;31	Leucine--tRNA ligase, cytoplasmic	LARS	>tr|F5H698|F5H698_HUMAN Leucine--tRNA ligase, cytoplasmic OS=Homo sapiens GN=LARS PE=2 SV=1;>tr|B4DER1|B4DER1_HUMAN Leucine--tRNA ligase, cytoplasmic OS=Homo sapiens GN=LARS PE=2 SV=1;>sp|Q9P2J5|SYLC_HUMAN Leucine--tRNA ligase, cytoplasmic OS=Homo sapiens	4	32	32	32	3	32	3	32	3	32	35.3	35.3	35.3	129.21	1130	1130;1149;1176;1122	3.27		1	39	16							4	52	4.1447e-212	0.8026	0.95713	14.602	52	0.79013	0.99576	-0.00613003	18.385	3	0.80319	0.95598	0.0649477
P26640;B0V043;B4DZ61;Q5SP20;B0V044;A2ABF4;H0Y426	P26640;B0V043	32;32;8;8;5;5;2	32;32;8;8;5;5;2	32;32;8;8;5;5;2	Valine--tRNA ligase	VARS	>sp|P26640|SYVC_HUMAN Valine--tRNA ligase OS=Homo sapiens GN=VARS PE=1 SV=4;>tr|B0V043|B0V043_HUMAN Valine--tRNA ligase OS=Homo sapiens GN=VARS PE=2 SV=1	7	32	32	32	9	29	9	29	9	29	33.6	33.6	33.6	140.47	1264	1264;1264;297;366;174;174;288	3.3		1	47	15	3						24	42	8.9236e-248	0.83745	0.98319	23.845	66	0.67389	0.79847	-0.32469	25.535	24	0.87376	1.0282	-0.0401209
P19338;H7BY16;C9JYW2;C9JLB1;C9J1H7;C9JWL1	P19338	32;15;8;8;8;8	32;15;8;8;8;8	32;15;8;8;8;8	Nucleolin	NCL	>sp|P19338|NUCL_HUMAN Nucleolin OS=Homo sapiens GN=NCL PE=1 SV=3	6	32	32	32	20	23	20	23	20	23	40.8	40.8	40.8	76.613	710	710;297;141;151;166;170	4			40	47	17	7	3				53	61	1.7752e-156	0.86245	1.0632	24.014	114	0.67634	0.84221	-0.247748	22.246	53	0.95876	1.137	-0.185232
P00338;P00338-3;P00338-4;P00338-5;P00338-2;F5GXY2;F5GYU2;F5GXH2;F5H5J4;F5H6W8;F5GZQ4;F5H8H6;F5GXC7;F5GWW2;F5GXU1;F5H5G7;Q6ZMR3	P00338;P00338-3;P00338-4;P00338-5;P00338-2;F5GXY2;F5GYU2	32;30;25;22;21;17;16;14;10;10;7;5;5;5;4;1;1	32;30;25;22;21;17;16;14;10;10;7;5;5;5;4;1;1	31;29;24;21;20;17;16;14;10;10;7;5;5;5;4;0;0	L-lactate dehydrogenase A chain	LDHA	>sp|P00338|LDHA_HUMAN L-lactate dehydrogenase A chain OS=Homo sapiens GN=LDHA PE=1 SV=2;>sp|P00338-3|LDHA_HUMAN Isoform 3 of L-lactate dehydrogenase A chain OS=Homo sapiens GN=LDHA;>sp|P00338-4|LDHA_HUMAN Isoform 4 of L-lactate dehydrogenase A chain OS=Hom	17	32	32	31	14	29	14	29	13	28	85.5	85.5	81.9	36.688	332	332;361;274;241;274;157;144;114;89;94;72;42;45;45;46;183;332	5.55	7	8	8	7	39	71	50	2		1	33	160	0	1.0573	1.1587	18.747	192	0.60501	0.8453	-0.242465	21.224	33	1.0759	1.1889	-0.249627
P08758;D6RBL5;D6RBE9;E9PHT9;D6RCN3	P08758;D6RBL5;D6RBE9;E9PHT9	32;21;20;17;5	32;21;20;17;5	32;21;20;17;5	Annexin A5;Annexin	ANXA5	>sp|P08758|ANXA5_HUMAN Annexin A5 OS=Homo sapiens GN=ANXA5 PE=1 SV=2;>tr|D6RBL5|D6RBL5_HUMAN Annexin OS=Homo sapiens GN=ANXA5 PE=2 SV=1;>tr|D6RBE9|D6RBE9_HUMAN Annexin OS=Homo sapiens GN=ANXA5 PE=2 SV=1;>tr|E9PHT9|E9PHT9_HUMAN Annexin OS=Homo sapiens GN=AN	5	32	32	32	9	29	9	29	9	29	82.2	82.2	82.2	35.936	320	320;260;220;163;35	6.27					23	62	54	2		1	18	124	0	1.1352	1.2468	21.79	140	0.55352	0.78863	-0.34258	37.296	18	1.1422	1.2654	-0.339594
P12814-2;P12814;P12814-3;B7TY16;H9KV75;G3V2W4;H0YJW3;H0YJ11;G3V2N5;H7C5W8;G3V2X9;P35609;B2RCS5;G3V5M4;Q08043;G3V2E8;D6RH00;G3V380;B7Z4P8	P12814-2;P12814;P12814-3;B7TY16;H9KV75	32;32;32;31;30;10;10;9;9;9;4;4;4;3;3;2;1;1;1	32;32;32;31;30;10;10;9;9;9;4;4;4;3;3;2;1;1;1	21;21;21;20;20;5;7;6;6;6;2;0;0;1;0;0;0;1;0	Alpha-actinin-1	ACTN1	>sp|P12814-2|ACTN1_HUMAN Isoform 2 of Alpha-actinin-1 OS=Homo sapiens GN=ACTN1;>sp|P12814|ACTN1_HUMAN Alpha-actinin-1 OS=Homo sapiens GN=ACTN1 PE=1 SV=2;>sp|P12814-3|ACTN1_HUMAN Isoform 3 of Alpha-actinin-1 OS=Homo sapiens GN=ACTN1;>tr|B7TY16|B7TY16_HUMAN	19	32	32	21	8	31	8	31	4	21	49.4	49.4	37.4	102.71	887	887;892;914;930;822;238;251;207;261;297;144;894;894;126;901;85;72;72;388	3.67		1	32	47	6						9	77	2.3911e-234	1.137	1.3551	21.99	86	0.83831	1.057	0.0799754	14.495	9	1.1609	1.3771	-0.461633
P00558;B7Z7A9;E7ERH5;P07205	P00558;B7Z7A9;E7ERH5	32;26;21;6	32;26;21;6	32;26;21;6	Phosphoglycerate kinase 1;Phosphoglycerate kinase	PGK1	>sp|P00558|PGK1_HUMAN Phosphoglycerate kinase 1 OS=Homo sapiens GN=PGK1 PE=1 SV=3;>tr|B7Z7A9|B7Z7A9_HUMAN Phosphoglycerate kinase OS=Homo sapiens GN=PGK1 PE=2 SV=1;>tr|E7ERH5|E7ERH5_HUMAN Phosphoglycerate kinase OS=Homo sapiens GN=PGK1 PE=2 SV=1	4	32	32	32	18	26	18	26	18	26	76	76	76	44.614	417	417;389;281;417	5.86				3	53	70	27	2	2		43	114	1.2962e-233	1.2364	1.3716	36.994	149	0.47395	0.67308	-0.57115	20.397	39	1.2831	1.4187	-0.50457
Q8WUM4;Q8WUM4-2;C9IZF9;F8WEQ7;F8WBR8;F8WDK9	Q8WUM4;Q8WUM4-2	31;30;4;2;2;2	31;30;4;2;2;2	31;30;4;2;2;2	Programmed cell death 6-interacting protein	PDCD6IP	>sp|Q8WUM4|PDC6I_HUMAN Programmed cell death 6-interacting protein OS=Homo sapiens GN=PDCD6IP PE=1 SV=1;>sp|Q8WUM4-2|PDC6I_HUMAN Isoform 2 of Programmed cell death 6-interacting protein OS=Homo sapiens GN=PDCD6IP	6	31	31	31	17	25	17	25	17	25	40.8	40.8	40.8	96.022	868	868;873;153;72;78;95	4.14			19	52	10	5	4				39	51	3.7926e-200	0.74627	0.86465	34.848	90	0.95468	1.1989	0.261711	37.157	39	0.66095	0.75025	0.414557
P49588;H3BPK7	P49588	31;7	31;7	31;7	Alanine--tRNA ligase, cytoplasmic	AARS	>sp|P49588|SYAC_HUMAN Alanine--tRNA ligase, cytoplasmic OS=Homo sapiens GN=AARS PE=1 SV=2	2	31	31	31	8	28	8	28	8	28	44.8	44.8	44.8	106.81	968	968;280	3.54			38	38	2						13	65	1.0627e-190	0.72509	0.88466	22.229	77	0.83207	1.0526	0.0739573	7.9057	13	0.72064	0.84669	0.240094
Q14789;Q14789-2;E7EU81;H0Y867;H7C5I7	Q14789;Q14789-2;E7EU81	31;31;18;9;1	31;31;18;9;1	31;31;18;9;1	Golgin subfamily B member 1	GOLGB1	>sp|Q14789|GOGB1_HUMAN Golgin subfamily B member 1 OS=Homo sapiens GN=GOLGB1 PE=1 SV=2;>sp|Q14789-2|GOGB1_HUMAN Isoform 2 of Golgin subfamily B member 1 OS=Homo sapiens GN=GOLGB1;>tr|E7EU81|E7EU81_HUMAN Golgin subfamily B member 1 (Fragment) OS=Homo sapien	5	31	31	31	4	30	4	30	4	30	14.1	14.1	14.1	376.01	3259	3259;3269;1640;1031;109	1.49	30	29									5	54	1.9734e-195	0.65096	0.88779	25.291	58	0.95176	1.2532	0.325617	32.635	5	0.64743	0.8696	0.201576
P23246;P23246-2;H0Y9K7;H0Y9U2	P23246;P23246-2	31;26;13;4	31;26;13;4	30;25;13;4	Splicing factor, proline- and glutamine-rich	SFPQ	>sp|P23246|SFPQ_HUMAN Splicing factor, proline- and glutamine-rich OS=Homo sapiens GN=SFPQ PE=1 SV=2;>sp|P23246-2|SFPQ_HUMAN Isoform Short of Splicing factor, proline- and glutamine-rich OS=Homo sapiens GN=SFPQ	4	31	31	30	24	20	24	20	23	19	45.3	45.3	44.1	76.149	707	707;669;223;88	3.83	1	2	31	56	9	4	1				42	62	1.8466e-177	0.7692	0.94784	17.671	103	0.76762	1.0163	0.0233263	17.727	42	0.7717	0.89809	0.155068
P02545;P02545-2;Q6UYC3;P02545-3;D6RAQ3;P02545-4;Q5TCI8;H0YAB0	P02545;P02545-2;Q6UYC3;P02545-3;D6RAQ3;P02545-4;Q5TCI8	31;30;30;30;24;24;23;9	31;30;30;30;24;24;23;9	31;30;30;30;24;24;23;9	Prelamin-A/C;Lamin-A/C	LMNA	>sp|P02545|LMNA_HUMAN Prelamin-A/C OS=Homo sapiens GN=LMNA PE=1 SV=1;>sp|P02545-2|LMNA_HUMAN Isoform C of Prelamin-A/C OS=Homo sapiens GN=LMNA;>tr|Q6UYC3|Q6UYC3_HUMAN Prelamin-A/C OS=Homo sapiens GN=LMNA PE=2 SV=1;>sp|P02545-3|LMNA_HUMAN Isoform ADelta10 o	8	31	31	31	19	23	19	23	19	23	47.6	47.6	47.6	74.139	664	664;572;614;634;565;574;491;182	4.92			1	31	48	17	4				54	47	1.0184e-148	0.98688	1.2591	32.542	98	1.072	1.5044	0.589188	29.966	51	0.84633	0.95199	0.0709817
D6REX3;O94979;O94979-3;O94979-4;O94979-9;O94979-2;O94979-8;O94979-6;B7ZL00;O94979-7;H7BXG7;D6RHZ5;O94979-5;H0YAB3;H0Y9K1;H0Y8V7;H0Y8W8;H0YAF5;H0Y9V3;H0Y9T9;D6RE64;D6RCQ9	D6REX3;O94979;O94979-3;O94979-4;O94979-9;O94979-2;O94979-8;O94979-6;B7ZL00;O94979-7;H7BXG7;D6RHZ5	31;30;29;29;29;29;29;28;28;27;27;22;15;14;9;9;7;4;3;2;1;1	31;30;29;29;29;29;29;28;28;27;27;22;15;14;9;9;7;4;3;2;1;1	31;30;29;29;29;29;29;28;28;27;27;22;15;14;9;9;7;4;3;2;1;1	Protein transport protein Sec31A	SEC31A	>tr|D6REX3|D6REX3_HUMAN Protein transport protein Sec31A OS=Homo sapiens GN=SEC31A PE=2 SV=1;>sp|O94979|SC31A_HUMAN Protein transport protein Sec31A OS=Homo sapiens GN=SEC31A PE=1 SV=3;>sp|O94979-3|SC31A_HUMAN Isoform 3 of Protein transport protein Sec31A	22	31	31	31	10	27	10	27	10	27	29.9	29.9	29.9	136.22	1251	1251;1220;1106;1181;1200;1205;1233;1067;1166;969;969;877;509;443;237;286;383;181;219;235;165;166	3.34	1	2	50	19	2	1	1				30	46	2.249e-148	0.80246	0.98616	19.99	75	0.68249	0.85424	-0.227287	17.849	30	0.85788	1.0333	-0.0472592
P68371;Q3ZCM7;M0R2D3;M0QY85;M0R0X0;M0QY37;M0QX14;M0QZL7;M0R2T4	P68371	31;9;7;5;4;4;4;4;2	31;9;7;5;4;4;4;4;2	2;0;0;0;0;0;0;0;0	Tubulin beta-4B chain	TUBB4B	>sp|P68371|TBB4B_HUMAN Tubulin beta-4B chain OS=Homo sapiens GN=TUBB4B PE=1 SV=1	9	31	31	2	21	26	21	26	2	1	67.6	67.6	3.6	49.83	445	445;444;155;107;103;109;110;158;104	5.28	3	6	9	63	111	84	36	2		8	111	211	0	0.86901	1.0115	37.039	315	0.68798	0.96004	-0.0588336	24.927	108	0.92008	1.0341	-0.0483757
P34932	P34932	31	31	29	Heat shock 70 kDa protein 4	HSPA4	>sp|P34932|HSP74_HUMAN Heat shock 70 kDa protein 4 OS=Homo sapiens GN=HSPA4 PE=1 SV=4	1	31	31	29	15	23	15	23	14	21	44	44	41.1	94.33	840	840	3.5	1	1	40	42	2						34	52	7.2664e-187	0.86163	1.0415	21.712	85	0.65169	0.80528	-0.312438	11.731	34	0.94633	1.1137	-0.155361
Q7KZF4;H7C597	Q7KZF4	31;8	31;8	31;8	Staphylococcal nuclease domain-containing protein 1	SND1	>sp|Q7KZF4|SND1_HUMAN Staphylococcal nuclease domain-containing protein 1 OS=Homo sapiens GN=SND1 PE=1 SV=1	2	31	31	31	15	24	15	24	15	24	48.4	48.4	48.4	102	910	910;231	3.71			24	41	4						20	49	1.0391e-143	1.0539	1.2727	31.977	69	0.5529	0.70671	-0.50081	8.6991	20	1.1262	1.2958	-0.373843
Q14974;B7ZAV6;F5H4R7;J3KTM9;J3QR48;J3QKQ5;J3KS06;J3QRG4	Q14974;B7ZAV6;F5H4R7;J3KTM9	31;22;21;21;9;4;1;1	31;22;21;21;9;4;1;1	31;22;21;21;9;4;1;1	Importin subunit beta-1	KPNB1	>sp|Q14974|IMB1_HUMAN Importin subunit beta-1 OS=Homo sapiens GN=KPNB1 PE=1 SV=2;>tr|B7ZAV6|B7ZAV6_HUMAN Importin subunit beta-1 OS=Homo sapiens GN=KPNB1 PE=2 SV=1;>tr|F5H4R7|F5H4R7_HUMAN Importin subunit beta-1 OS=Homo sapiens GN=KPNB1 PE=2 SV=1;>tr|J3KTM	8	31	31	31	12	28	12	28	12	28	43	43	43	97.169	876	876;731;660;690;149;248;22;60	4.19	1		24	54	18	9	4				37	73	8.2564e-205	1.0813	1.238	30.618	109	0.58839	0.72109	-0.471749	17.968	37	1.1287	1.3082	-0.387583
O43707;D6PXK4;F5GXS2;H7C144;K7EJH8;K7EP19	O43707;D6PXK4;F5GXS2	30;22;16;13;5;2	19;14;12;10;3;1	18;14;12;10;3;1	Alpha-actinin-4	ACTN4	>sp|O43707|ACTN4_HUMAN Alpha-actinin-4 OS=Homo sapiens GN=ACTN4 PE=1 SV=2;>tr|D6PXK4|D6PXK4_HUMAN Alpha actinin 4 short isoform OS=Homo sapiens GN=ACTN4 PE=2 SV=1;>tr|F5GXS2|F5GXS2_HUMAN Alpha-actinin-4 OS=Homo sapiens GN=ACTN4 PE=2 SV=1	6	30	19	18	10	29	6	19	5	18	44.5	31.6	30.4	104.85	911	911;692;521;342;182;105	3.71			18	31	3						11	41	1.058e-166	0.78433	0.9464	26.636	52	1.2643	1.6272	0.702392	10.418	11	0.75982	0.90125	0.150001
Q16531;F5GY55;B4DG00;F8WF81;F5GZ34;F5H0Y5;F5H775;F5H2L3;F5H581;F5H6C5;F5H238;F5GWI0;F5GZY8;F5H4N9;F5GYG8;F5H198;F5H7A0	Q16531;F5GY55;B4DG00	30;24;15;6;6;6;6;5;5;5;5;4;4;4;3;3;3	30;24;15;6;6;6;6;5;5;5;5;4;4;4;3;3;3	30;24;15;6;6;6;6;5;5;5;5;4;4;4;3;3;3	DNA damage-binding protein 1	DDB1	>sp|Q16531|DDB1_HUMAN DNA damage-binding protein 1 OS=Homo sapiens GN=DDB1 PE=1 SV=1;>tr|F5GY55|F5GY55_HUMAN DNA damage-binding protein 1 OS=Homo sapiens GN=DDB1 PE=2 SV=1;>tr|B4DG00|B4DG00_HUMAN DNA damage-binding protein 1 OS=Homo sapiens GN=DDB1 PE=2 SV	17	30	30	30	4	28	4	28	4	28	29.9	29.9	29.9	126.97	1140	1140;1092;451;127;187;204;240;165;267;272;303;139;146;254;109;162;182	2.73	22	25	39	25	3	1	1				19	97	1.9427e-123	0.74335	0.92502	15.15	116	0.77381	1.0046	0.00662118	13.821	19	0.72549	0.91424	0.129355
P22570;P22570-7;P22570-5;P22570-2;P22570-3;P22570-4;P22570-6;J3QQX3;G3V0F2;J3QKZ8;J3QQW7;J3KS64	P22570;P22570-7;P22570-5;P22570-2;P22570-3;P22570-4;P22570-6;J3QQX3	29;29;28;28;28;27;27;25;14;4;3;1	29;29;28;28;28;27;27;25;14;4;3;1	29;29;28;28;28;27;27;25;14;4;3;1	NADPH:adrenodoxin oxidoreductase, mitochondrial	FDXR	>sp|P22570|ADRO_HUMAN NADPH:adrenodoxin oxidoreductase, mitochondrial OS=Homo sapiens GN=FDXR PE=1 SV=3;>sp|P22570-7|ADRO_HUMAN Isoform 7 of NADPH:adrenodoxin oxidoreductase, mitochondrial OS=Homo sapiens GN=FDXR;>sp|P22570-5|ADRO_HUMAN Isoform 5 of NADPH:	12	29	29	29	21	24	21	24	21	24	60.7	60.7	60.7	53.836	491	491;522;483;497;534;439;451;463;381;164;178;91	5.58				1	49	49	7				53	53	1.1379e-164	0.76501	1.0237	32.618	105	0.89127	1.2679	0.342441	19.151	53	0.6429	0.72226	0.46941
Q92945;M0R0I5;M0QYH3;M0QXW7;M0R3J3;M0QYG1;M0R0C6;M0R251;M0R263	Q92945;M0R0I5	29;15;7;6;4;2;2;1;1	29;15;7;6;4;2;2;1;1	28;15;7;6;3;1;1;0;0	Far upstream element-binding protein 2	KHSRP	>sp|Q92945|FUBP2_HUMAN Far upstream element-binding protein 2 OS=Homo sapiens GN=KHSRP PE=1 SV=4;>tr|M0R0I5|M0R0I5_HUMAN Far upstream element-binding protein 2 (Fragment) OS=Homo sapiens GN=KHSRP PE=4 SV=1	9	29	29	28	29	14	29	14	28	13	54	54	51.8	73.114	711	711;279;169;116;269;114;176;79;143	4.53		1	17	57	41	14	6	1			111	26	3.3507e-165	0.82885	1.0903	22.493	133	0.84344	1.1372	0.185486	19.696	107	0.70421	0.82493	0.277656
P68104;Q5VTE0;Q5JR01;A6PW80	P68104;Q5VTE0	29;27;7;6	29;27;7;6	15;14;2;2	Elongation factor 1-alpha 1;Putative elongation factor 1-alpha-like 3	EEF1A1;EEF1A1P5	>sp|P68104|EF1A1_HUMAN Elongation factor 1-alpha 1 OS=Homo sapiens GN=EEF1A1 PE=1 SV=1;>sp|Q5VTE0|EF1A3_HUMAN Putative elongation factor 1-alpha-like 3 OS=Homo sapiens GN=EEF1A1P5 PE=5 SV=1	4	29	29	15	13	24	13	24	6	12	76.8	76.8	45.2	50.14	462	462;462;145;107	4.69	20	22	24	29	68	61	29	3		3	85	174	1.3172e-166	0.79364	0.94016	25.36	255	0.82145	1.124	0.168642	23.556	85	0.77129	0.87618	0.190701
P46939;Q5T097;Q5SYY1;H0Y337	P46939	29;7;2;1	29;7;2;1	29;7;2;1	Utrophin	UTRN	>sp|P46939|UTRO_HUMAN Utrophin OS=Homo sapiens GN=UTRN PE=1 SV=2	4	29	29	29	4	29	4	29	4	29	12	12	12	394.46	3433	3433;988;153;251	1.61	29	34	3								7	59	3.2867e-254	0.73539	0.89643	21.44	66	0.81873	0.79722	-0.32695	41.465	7	0.73194	0.89944	0.152901
Q5JP53;P07437;Q5ST81;E9PBJ4;F5H0I4;Q5SQY0;I3L2F9;A6NNZ2;A6NKZ8;Q9H4B7;CON__ENSEMBL:ENSBTAP00000025008	Q5JP53;P07437;Q5ST81	29;29;25;13;8;8;8;8;6;5;5	7;7;3;6;0;0;0;0;0;0;0	6;6;3;5;0;0;0;0;0;0;0	Tubulin beta chain	TUBB	>tr|Q5JP53|Q5JP53_HUMAN Tubulin beta chain OS=Homo sapiens GN=TUBB PE=2 SV=1;>sp|P07437|TBB5_HUMAN Tubulin beta chain OS=Homo sapiens GN=TUBB PE=1 SV=2;>tr|Q5ST81|Q5ST81_HUMAN Tubulin beta chain OS=Homo sapiens GN=TUBB PE=2 SV=1	11	29	7	6	20	24	6	6	5	5	66.2	21.4	17.8	47.766	426	426;444;372;243;372;410;410;444;372;451;536	5.53	1		3	19	27	24	16	3		3	36	60	0	0.80973	0.93374	25.585	96	0.78523	1.0865	0.119688	27.968	36	0.81678	0.90683	0.141096
Q9UDY2-3;Q9UDY2;Q9UDY2-7;Q9UDY2-6;Q9UDY2-5;Q9UDY2-4;Q9UDY2-2	Q9UDY2-3;Q9UDY2;Q9UDY2-7;Q9UDY2-6;Q9UDY2-5;Q9UDY2-4;Q9UDY2-2	29;29;29;28;24;24;24	29;29;29;28;24;24;24	29;29;29;28;24;24;24	Tight junction protein ZO-2	TJP2	>sp|Q9UDY2-3|ZO2_HUMAN Isoform C1 of Tight junction protein ZO-2 OS=Homo sapiens GN=TJP2;>sp|Q9UDY2|ZO2_HUMAN Tight junction protein ZO-2 OS=Homo sapiens GN=TJP2 PE=1 SV=2;>sp|Q9UDY2-7|ZO2_HUMAN Isoform 7 of Tight junction protein ZO-2 OS=Homo sapiens GN=T	7	29	29	29	19	18	19	18	19	18	27.2	27.2	27.2	131.37	1167	1167;1190;1221;1157;993;1020;1043	3.42			43	14	3	2					41	21	6.6158e-123	0.76847	0.96763	22.068	62	0.7597	0.96954	-0.0446277	25.665	41	0.78027	0.96572	0.0503231
G5EA52;P30101	G5EA52;P30101	29;29	29;29	22;22	Protein disulfide-isomerase A3	PDIA3	>tr|G5EA52|G5EA52_HUMAN Protein disulfide isomerase family A, member 3, isoform CRA_b OS=Homo sapiens GN=PDIA3 PE=2 SV=1;>sp|P30101|PDIA3_HUMAN Protein disulfide-isomerase A3 OS=Homo sapiens GN=PDIA3 PE=1 SV=4	2	29	29	22	16	27	16	27	9	21	55.7	55.7	45.6	54.963	485	485;505	5.08		1	6	34	63	40	11				71	84	2.3089e-172	0.86896	1.0072	15.466	153	0.67974	0.94558	-0.0807286	14.992	71	0.95253	1.0786	-0.10916
Q00839;Q5RI18	Q00839	29;6	29;6	3;0	Heterogeneous nuclear ribonucleoprotein U	HNRNPU	>sp|Q00839|HNRPU_HUMAN Heterogeneous nuclear ribonucleoprotein U OS=Homo sapiens GN=HNRNPU PE=1 SV=6	2	29	29	3	15	24	15	24	3	1	38.8	38.8	2.9	90.583	825	825;242	3.68		1	46	30	9	2	2				42	48	1.9616e-119	0.85641	1.0484	21.064	89	0.7428	0.91075	-0.134873	20.222	41	0.91824	1.1337	-0.181039
Q9H4M9;C9JC03;C9J2Z4;C9JIJ3;C9IZH1;C9JDQ8	Q9H4M9;C9JC03;C9J2Z4	29;16;15;5;5;5	29;16;15;5;5;5	21;8;9;3;3;1	EH domain-containing protein 1	EHD1	>sp|Q9H4M9|EHD1_HUMAN EH domain-containing protein 1 OS=Homo sapiens GN=EHD1 PE=1 SV=2;>tr|C9JC03|C9JC03_HUMAN EH domain-containing protein 1 (Fragment) OS=Homo sapiens GN=EHD1 PE=2 SV=1;>tr|C9J2Z4|C9J2Z4_HUMAN EH domain-containing protein 1 (Fragment) OS=	6	29	29	21	17	18	17	18	16	10	68	68	51.9	60.626	534	534;374;306;145;148;162	4.91			1	14	42	6	2				30	35	5.1124e-121	0.81799	1.001	41.833	63	0.47133	0.66082	-0.597671	18.156	30	1.2604	1.4242	-0.510152
E9PEM5;P50851-2;F5H1X8;P50851;H0YAC6;Q5T321;Q8NFP9;F5GXV7;H0Y9N9;Q8NFP9-3	E9PEM5;P50851-2;F5H1X8;P50851;H0YAC6	29;29;29;28;16;3;3;3;2;1	29;29;29;28;16;3;3;3;2;1	29;29;29;28;16;3;3;3;2;1	Lipopolysaccharide-responsive and beige-like anchor protein	LRBA	>tr|E9PEM5|E9PEM5_HUMAN Lipopolysaccharide-responsive and beige-like anchor protein OS=Homo sapiens GN=LRBA PE=2 SV=1;>sp|P50851-2|LRBA_HUMAN Isoform 2 of Lipopolysaccharide-responsive and beige-like anchor protein OS=Homo sapiens GN=LRBA;>tr|F5H1X8|F5H1X8	10	29	29	29	7	28	7	28	7	28	14.1	14.1	14.1	286.97	2575	2575;2851;2852;2863;1505;2943;2946;2946;134;739	1.2	39	10									10	39	2.7665e-140	1.6543	2.0379	73.802	47	0.39065	0.36872	-1.4394	33.796	10	1.7198	2.1693	-1.11723
P02452	P02452	28	28	27	Collagen alpha-1(I) chain	COL1A1	>sp|P02452|CO1A1_HUMAN Collagen alpha-1(I) chain OS=Homo sapiens GN=COL1A1 PE=1 SV=5	1	28	28	27	27	5	27	5	26	5	33.1	33.1	32.1	138.94	1464	1464	3.07		2	38	5							38	7	6.5579e-130	3.1898	3.9847	105.55	45	3.9617	4.7486	2.2475	59.997	38	0.26549	0.33563	1.57506
P35221;P35221-2;F8W845;G3XAM7;Q8N1C0;E5RIB1;E5RG03;E5RIC3;E5RGY6;E5RJL0;E5RIE0;E5RHV7;E5RFM3;E5RGY7;E5RJ41;P26232-4;P26232-6;E5RJZ2;E5RGG4;E5RJ43;E5RGS1;E5RIT8;E5RGU3;E5RHJ5;E5RFG3;E5RFK9;E5RFM5;E5RJP7;E5RGD2;H0YBB8;A6NKP0;Q9UI47	P35221;P35221-2;F8W845;G3XAM7;Q8N1C0	28;26;23;22;15;9;7;7;6;5;5;5;4;4;4;2;2;1;1;1;1;1;1;1;1;1;1;1;1;1;1;1	28;26;23;22;15;9;7;7;6;5;5;5;4;4;4;2;2;1;1;1;1;1;1;1;1;1;1;1;1;1;1;1	25;23;20;19;13;8;6;6;5;5;5;5;4;4;3;0;0;1;1;1;1;1;1;1;1;1;1;1;1;1;1;1	Catenin alpha-1	CTNNA1	>sp|P35221|CTNA1_HUMAN Catenin alpha-1 OS=Homo sapiens GN=CTNNA1 PE=1 SV=1;>sp|P35221-2|CTNA1_HUMAN Isoform 2 of Catenin alpha-1 OS=Homo sapiens GN=CTNNA1;>tr|F8W845|F8W845_HUMAN Catenin alpha-1 OS=Homo sapiens GN=CTNNA1 PE=2 SV=1;>tr|G3XAM7|G3XAM7_HUMAN C	32	28	28	25	12	24	12	24	12	21	40.4	40.4	36.6	100.07	906	906;930;803;841;536;215;156;182;139;101;118;123;94;136;161;537;584;37;39;41;50;55;71;75;92;105;110;119;128;129;234;895	3.66		1	22	39	2						17	47	1.5627e-248	0.67435	0.78503	27.945	63	0.93026	1.1446	0.194844	24.622	17	0.64601	0.744	0.426625
O75962-5;O75962;O75962-4;O75962-2;E7EWP2;E7EPJ7;F5H228;O60229-3;C9IZQ6;O60229-2;H7BXZ5;O60229;J3QSW6;H7C1X7	O75962-5;O75962;O75962-4;O75962-2;E7EWP2;E7EPJ7;F5H228	28;28;27;26;25;25;16;3;3;3;3;3;3;1	28;28;27;26;25;25;16;3;3;3;3;3;3;1	28;28;27;26;25;25;16;3;3;3;3;3;3;1	Triple functional domain protein	TRIO	>sp|O75962-5|TRIO_HUMAN Isoform 5 of Triple functional domain protein OS=Homo sapiens GN=TRIO;>sp|O75962|TRIO_HUMAN Triple functional domain protein OS=Homo sapiens GN=TRIO PE=1 SV=2;>sp|O75962-4|TRIO_HUMAN Isoform 4 of Triple functional domain protein OS=	14	28	28	28	4	26	4	26	4	26	14.8	14.8	14.8	287.37	2563	2563;3097;3038;2921;2309;2546;1508;851;1654;1663;2955;2985;2986;215	2.05	16	34	8	2	1	1					17	45	4.2841e-111	0.62563	0.79433	30.665	61	0.95582	1.1173	0.160017	30.007	17	0.60807	0.77993	0.358583
Q15233;Q15233-2;H7C367;C9JYS8;C9IZL7;C9J4X2;C9JJ13	Q15233;Q15233-2;H7C367;C9JYS8	28;26;16;14;7;3;1	27;25;15;14;6;3;1	27;25;15;14;6;3;1	Non-POU domain-containing octamer-binding protein	NONO	>sp|Q15233|NONO_HUMAN Non-POU domain-containing octamer-binding protein OS=Homo sapiens GN=NONO PE=1 SV=4;>sp|Q15233-2|NONO_HUMAN Isoform 2 of Non-POU domain-containing octamer-binding protein OS=Homo sapiens GN=NONO;>tr|H7C367|H7C367_HUMAN Non-POU domain-	7	28	27	27	22	19	21	18	21	18	62.2	60.5	60.5	54.231	471	471;382;235;248;207;124;66	5.09			1	22	72	27	4				79	47	3.9074e-205	0.76907	1.0291	20.458	123	0.78672	1.1128	0.154194	12.09	76	0.74674	0.85336	0.228774
P06576;F8VPV9;H0YH81;F8W079;F8W0P7;H0YI37;F8VQY0	P06576;F8VPV9;H0YH81;F8W079	28;25;23;16;10;6;4	28;25;23;16;10;6;4	28;25;23;16;10;6;4	ATP synthase subunit beta, mitochondrial;ATP synthase subunit beta	ATP5B	>sp|P06576|ATPB_HUMAN ATP synthase subunit beta, mitochondrial OS=Homo sapiens GN=ATP5B PE=1 SV=3;>tr|F8VPV9|F8VPV9_HUMAN ATP synthase subunit beta OS=Homo sapiens GN=ATP5B PE=2 SV=1;>tr|H0YH81|H0YH81_HUMAN ATP synthase subunit beta (Fragment) OS=Homo sapi	7	28	28	28	12	27	12	27	12	27	74.3	74.3	74.3	56.559	529	529;518;362;284;259;133;218	5.3				32	65	53	13	1			37	127	0	0.92171	1.0317	15.477	161	0.66332	0.93371	-0.0989536	10.248	35	0.94923	1.0655	-0.0915306
P60842;J3KT12;P60842-2;J3QS69;J3QL43;J3KTB5;J3KSZ0;J3KS25;J3QR64;J3QLN6;J3QKZ9;J3KTN0;B4E102;J3QL52;J3KS93;J3QQP0;J3QRP5;J3KRC2	P60842;J3KT12;P60842-2;J3QS69;J3QL43;J3KTB5	28;21;21;18;16;15;13;11;11;10;9;8;5;4;3;3;1;1	28;21;21;18;16;15;13;11;11;10;9;8;5;4;3;3;1;1	17;12;12;10;7;8;7;5;5;4;4;4;3;2;1;2;1;1	Eukaryotic initiation factor 4A-I	EIF4A1	>sp|P60842|IF4A1_HUMAN Eukaryotic initiation factor 4A-I OS=Homo sapiens GN=EIF4A1 PE=1 SV=1;>tr|J3KT12|J3KT12_HUMAN Eukaryotic initiation factor 4A-I OS=Homo sapiens GN=EIF4A1 PE=3 SV=1;>sp|P60842-2|IF4A1_HUMAN Isoform 2 of Eukaryotic initiation factor 4A	18	28	28	17	7	26	7	26	4	15	72.7	72.7	46.8	46.153	406	406;341;347;300;271;257;230;188;214;163;135;117;146;68;85;95;74;85	5.6			1	11	50	45	17			2	11	115	5.2926e-267	1.1035	1.2415	27.514	120	0.53545	0.77175	-0.373795	81.673	10	1.1206	1.2591	-0.332393
O60716-5;O60716-3;C9JZR2;O60716-2;O60716;O60716-8;O60716-7;O60716-13;O60716-11;O60716-6;O60716-4;O60716-10;O60716-9;O60716-21;O60716-19;O60716-16;O60716-18;O60716-15;O60716-17;O60716-14;O60716-12;O60716-24;O60716-23;O60716-22;O60716-20;O60716-29;O60716-27;O60716-26;O60716-25;O60716-32;O60716-31;O60716-30;O60716-28;H0YC95;E9PRE2;E9PKL1;E9PKY0	O60716-5;O60716-3;C9JZR2;O60716-2;O60716;O60716-8;O60716-7;O60716-13;O60716-11;O60716-6;O60716-4;O60716-10;O60716-9;O60716-21;O60716-19;O60716-16;O60716-18;O60716-15;O60716-17;O60716-14;O60716-12;O60716-24;O60716-23;O60716-22;O60716-20;O60716-29;O60716-27;O60716-26;O60716-25	27;27;26;26;26;24;24;23;23;23;23;22;22;21;21;20;20;20;20;19;19;18;18;17;17;16;16;15;15;13;13;12;12;6;5;3;2	27;27;26;26;26;24;24;23;23;23;23;22;22;21;21;20;20;20;20;19;19;18;18;17;17;16;16;15;15;13;13;12;12;6;5;3;2	27;27;26;26;26;24;24;23;23;23;23;22;22;21;21;20;20;20;20;19;19;18;18;17;17;16;16;15;15;13;13;12;12;6;5;3;2	Catenin delta-1	CTNND1	>sp|O60716-5|CTND1_HUMAN Isoform 1A of Catenin delta-1 OS=Homo sapiens GN=CTNND1;>sp|O60716-3|CTND1_HUMAN Isoform 1AC of Catenin delta-1 OS=Homo sapiens GN=CTNND1;>tr|C9JZR2|C9JZR2_HUMAN Catenin delta-1 OS=Homo sapiens GN=CTNND1 PE=2 SV=2;>sp|O60716-2|CTND	37	27	27	27	18	14	18	14	18	14	38	38	38	104.15	933	933;939;938;962;968;912;918;879;885;941;947;908;914;832;838;858;861;864;867;887;893;811;817;840;846;610;616;639;645;589;595;618;624;123;261;129;126	3.9		1	22	35	10	2	1				44	27	2.9688e-142	0.87556	1.0905	29.223	71	0.91262	1.1797	0.23842	17.043	44	0.62871	0.72785	0.458287
K7EJT8;P63010;P63010-2;Q7Z451;K7EN71;K7ERB2;K7EJX1;K7ERE4;K7EKZ5	K7EJT8;P63010;P63010-2;Q7Z451	27;27;27;25;4;4;3;2;2	27;27;27;25;4;4;3;2;2	17;17;17;16;2;2;1;1;1	AP-2 complex subunit beta	AP2B1	>tr|K7EJT8|K7EJT8_HUMAN AP-2 complex subunit beta OS=Homo sapiens GN=AP2B1 PE=4 SV=1;>sp|P63010|AP2B1_HUMAN AP-2 complex subunit beta OS=Homo sapiens GN=AP2B1 PE=1 SV=1;>sp|P63010-2|AP2B1_HUMAN Isoform 2 of AP-2 complex subunit beta OS=Homo sapiens GN=AP2B	9	27	27	17	6	26	6	26	5	16	39	39	27.8	101.33	913	913;937;951;880;132;151;80;49;63	3.71			27	35	7						6	63	8.7502e-159	0.79901	0.93303	12.03	69	0.81152	0.99863	-0.00197785	13.525	6	0.79209	0.92857	0.106917
Q00839-2	Q00839-2	27	1	1			>sp|Q00839-2|HNRPU_HUMAN Isoform Short of Heterogeneous nuclear ribonucleoprotein U OS=Homo sapiens GN=HNRNPU	1	27	1	1	13	24	1	1	1	1	38.6	1.9	1.9	88.979	806	806	3		1	2	1							2	2	9.9014e-114	0.91093	1.056	42.61	4	1.0303	1.1658	0.22132	47.677	2	0.79353	0.93028	0.104263
P04843;B7Z4L4;F8WF32	P04843;B7Z4L4	27;19;5	27;19;5	27;19;5	Dolichyl-diphosphooligosaccharide--protein glycosyltransferase subunit 1	RPN1	>sp|P04843|RPN1_HUMAN Dolichyl-diphosphooligosaccharide--protein glycosyltransferase subunit 1 OS=Homo sapiens GN=RPN1 PE=1 SV=1;>tr|B7Z4L4|B7Z4L4_HUMAN Dolichyl-diphosphooligosaccharide--protein glycosyltransferase subunit 1 OS=Homo sapiens GN=RPN1 PE=2 S	3	27	27	27	9	24	9	24	9	24	56.5	56.5	56.5	68.569	607	607;435;121	4.16	4	4	8	38	35	4					24	69	1.2814e-127	0.85567	1.005	15.623	90	0.68404	0.95522	-0.0660951	14.439	23	0.9032	1.0195	-0.0278618
O95757;E7ES43;E9PDE8;D6RJ96	O95757;E7ES43;E9PDE8	27;27;26;13	25;25;24;12	24;24;23;11	Heat shock 70 kDa protein 4L	HSPA4L	>sp|O95757|HS74L_HUMAN Heat shock 70 kDa protein 4L OS=Homo sapiens GN=HSPA4L PE=1 SV=3;>tr|E7ES43|E7ES43_HUMAN Heat shock 70 kDa protein 4L OS=Homo sapiens GN=HSPA4L PE=2 SV=2;>tr|E9PDE8|E9PDE8_HUMAN Heat shock 70 kDa protein 4L OS=Homo sapiens GN=HSPA4L	4	27	25	24	20	16	19	14	19	13	39.7	36.7	35	94.511	839	839;870;813;531	3.61			23	36							30	29	6.4139e-123	0.78591	0.96429	20.781	59	0.69031	0.84771	-0.238357	20.254	30	0.90919	1.0561	-0.0787464
P62424;Q5T8U3;Q5T8U2	P62424;Q5T8U3	27;21;8	27;21;8	27;21;8	60S ribosomal protein L7a	RPL7A	>sp|P62424|RL7A_HUMAN 60S ribosomal protein L7a OS=Homo sapiens GN=RPL7A PE=1 SV=2;>tr|Q5T8U3|Q5T8U3_HUMAN 60S ribosomal protein L7a (Fragment) OS=Homo sapiens GN=RPL7A PE=2 SV=1	3	27	27	27	24	16	24	16	24	16	55.3	55.3	55.3	29.995	266	266;191;151	6.48	1		1		2	37	51	2			52	42	3.2135e-92	0.67637	0.96246	26.086	94	0.61831	0.90084	-0.150657	28.444	52	1.0308	1.0731	-0.101785
P62258;P62258-2;B4DJF2;I3L3T1;K7EM20;K7EIT4;I3L0W5	P62258;P62258-2	27;21;12;12;9;7;3	27;21;12;12;9;7;3	24;19;10;10;8;6;2	14-3-3 protein epsilon	YWHAE	>sp|P62258|1433E_HUMAN 14-3-3 protein epsilon OS=Homo sapiens GN=YWHAE PE=1 SV=1;>sp|P62258-2|1433E_HUMAN Isoform SV of 14-3-3 protein epsilon OS=Homo sapiens GN=YWHAE	7	27	27	24	6	26	6	26	4	23	84.3	84.3	81.2	29.174	255	255;233;94;107;115;109;38	6.56					5	40	46	2		2	11	84	9.9834e-247	1.0185	1.1295	15.354	92	0.63536	0.87778	-0.188069	6.9896	10	1.0331	1.1438	-0.193835
Q9BQG0;Q9BQG0-2;I3L1L3;I3L2H8	Q9BQG0;Q9BQG0-2;I3L1L3	27;27;25;7	27;27;25;7	27;27;25;7	Myb-binding protein 1A	MYBBP1A	>sp|Q9BQG0|MBB1A_HUMAN Myb-binding protein 1A OS=Homo sapiens GN=MYBBP1A PE=1 SV=2;>sp|Q9BQG0-2|MBB1A_HUMAN Isoform 2 of Myb-binding protein 1A OS=Homo sapiens GN=MYBBP1A;>tr|I3L1L3|I3L1L3_HUMAN Myb-binding protein 1A (Fragment) OS=Homo sapiens GN=MYBBP1A	4	27	27	27	6	23	6	23	6	23	30.3	30.3	30.3	148.85	1328	1328;1332;1252;204	3.2			34	6	1						9	32	4.7209e-189	1.0076	1.2078	62.338	41	0.62367	0.6808	-0.554697	33.958	9	1.0562	1.2296	-0.298189
Q13200;E7EW34;E9PCS3;C9JPC0;H7C1H2;H7C2Q3;F8WBS8	Q13200;E7EW34;E9PCS3	27;19;18;8;6;4;3	27;19;18;8;6;4;3	27;19;18;8;6;4;3	26S proteasome non-ATPase regulatory subunit 2	PSMD2	>sp|Q13200|PSMD2_HUMAN 26S proteasome non-ATPase regulatory subunit 2 OS=Homo sapiens GN=PSMD2 PE=1 SV=3;>tr|E7EW34|E7EW34_HUMAN 26S proteasome non-ATPase regulatory subunit 2 OS=Homo sapiens GN=PSMD2 PE=2 SV=1;>tr|E9PCS3|E9PCS3_HUMAN 26S proteasome non-AT	7	27	27	27	13	20	13	20	13	20	42.1	42.1	42.1	100.2	908	908;778;749;217;203;143;59	3.98			22	47	13	2	1				36	49	1.7315e-153	0.98457	1.1676	30.871	85	0.55782	0.7431	-0.428372	15.643	36	1.0931	1.2848	-0.361544
O75533;H7C341;O75533-2;B4DGZ4	O75533	27;2;1;1	27;2;1;1	27;2;1;1	Splicing factor 3B subunit 1	SF3B1	>sp|O75533|SF3B1_HUMAN Splicing factor 3B subunit 1 OS=Homo sapiens GN=SF3B1 PE=1 SV=3	4	27	27	27	11	20	11	20	11	20	31.4	31.4	31.4	145.83	1304	1304;241;144;154	3.3			33	14							20	27	9.3961e-181	1.0661	1.2547	35.645	47	0.60216	0.75129	-0.412558	23.966	20	1.2002	1.4577	-0.543694
O00151	O00151	26	26	26	PDZ and LIM domain protein 1	PDLIM1	>sp|O00151|PDLI1_HUMAN PDZ and LIM domain protein 1 OS=Homo sapiens GN=PDLIM1 PE=1 SV=4	1	26	26	26	22	16	22	16	22	16	84.8	84.8	84.8	36.071	329	329	6.28				3	19	59	42	8		1	83	49	1.2695e-270	1.496	2.1121	84.121	130	1.5974	2.2601	1.17639	28.347	82	0.36838	0.40773	1.29431
Q9BVA1	Q9BVA1	26	2	2	Tubulin beta-2B chain	TUBB2B	>sp|Q9BVA1|TBB2B_HUMAN Tubulin beta-2B chain OS=Homo sapiens GN=TUBB2B PE=1 SV=1	1	26	2	2	15	24	1	1	1	1	62.7	3.6	3.6	49.953	445	445	5.2				1	2	2					2	3	7.5135e-285	1.161	1.3649	78.535	5	1.7952	2.5737	1.36384	6.4323	2	0.52454	0.5855	0.772259
Q13885	Q13885	26	6	2	Tubulin beta-2A chain	TUBB2A	>sp|Q13885|TBB2A_HUMAN Tubulin beta-2A chain OS=Homo sapiens GN=TUBB2A PE=1 SV=1	1	26	6	2	15	24	5	5	1	1	62.7	17.8	3.6	49.906	445	445	5.09				9	15	6	3				12	21	7.2419e-287	0.75882	0.80221	38.519	33	0.99162	1.4038	0.489337	28.878	12	0.66104	0.73382	0.446502
P08107;P08107-2;E7EP94;Q5SP16	P08107;P08107-2;E7EP94;Q5SP16	26;21;18;14	22;17;15;11	14;10;8;6	Heat shock 70 kDa protein 1A/1B	HSPA1A	>sp|P08107|HSP71_HUMAN Heat shock 70 kDa protein 1A/1B OS=Homo sapiens GN=HSPA1A PE=1 SV=5;>sp|P08107-2|HSP71_HUMAN Isoform 2 of Heat shock 70 kDa protein 1A/1B OS=Homo sapiens GN=HSPA1A;>tr|E7EP94|E7EP94_HUMAN Heat shock 70 kDa protein 1A/1B OS=Homo sapie	4	26	22	14	15	20	12	16	6	9	46.8	42.3	25.7	70.051	641	641;586;550;476	4.71				27	37	5	1				26	44	3.3877e-155	0.79567	0.95366	22.293	69	0.82376	1.129	0.175045	14.366	25	0.77503	0.89208	0.164755
P20810-5;E7ESM9;P20810-6;E9PCH5;P20810-2;P20810-9;P20810-7;P20810-8;E7EVY3;B7Z574;P20810;E9PDE4;E7ES10;P20810-4;P20810-3;F8W7E0;H0Y9H6;H0Y7F0;E7EQ12;H0YA91;E7EQA0;H0YD33;H0Y944;E9PSG1;E7EQK6;D6RC54;D6RBZ8;D6RAA8	P20810-5;E7ESM9;P20810-6;E9PCH5;P20810-2;P20810-9;P20810-7;P20810-8;E7EVY3;B7Z574;P20810;E9PDE4;E7ES10;P20810-4;P20810-3;F8W7E0;H0Y9H6;H0Y7F0	26;25;25;22;22;22;22;21;21;21;21;19;19;18;17;15;15;14;12;11;11;11;9;7;5;4;3;1	26;25;25;22;22;22;22;21;21;21;21;19;19;18;17;15;15;14;12;11;11;11;9;7;5;4;3;1	2;1;1;1;1;1;1;0;0;0;0;0;0;0;1;2;0;0;0;1;0;0;0;1;0;0;0;0	Calpastatin	CAST	>sp|P20810-5|ICAL_HUMAN Isoform 5 of Calpastatin OS=Homo sapiens GN=CAST;>tr|E7ESM9|E7ESM9_HUMAN DNA-directed RNA polymerase I subunit RPA34 OS=Homo sapiens GN=CAST PE=2 SV=1;>sp|P20810-6|ICAL_HUMAN Isoform 6 of Calpastatin OS=Homo sapiens GN=CAST;>tr|E9PC	28	26	26	2	19	14	19	14	0	2	45.1	45.1	5.2	81.168	756	756;769;791;673;695;750;772;686;693;694;708;636;642;667;590;393;465;436;423;301;431;450;288;304;156;91;82;78	4		1	35	40	10	6	5				65	32	6.5824e-177	0.78576	0.97242	23.394	95	0.78576	0.97987	-0.0293377	19.621	63	0.78293	0.93803	0.092294
A8MUB1;P68366;C9JEV8;C9JQ00;C9JJQ8;C9JDL2	A8MUB1;P68366	26;26;8;8;8;5	5;5;2;2;2;1	3;3;2;2;2;1	Tubulin alpha-4A chain	TUBA4A	>tr|A8MUB1|A8MUB1_HUMAN Tubulin alpha-4A chain OS=Homo sapiens GN=TUBA4A PE=2 SV=1;>sp|P68366|TBA4A_HUMAN Tubulin alpha-4A chain OS=Homo sapiens GN=TUBA4A PE=1 SV=1	6	26	5	3	12	25	3	5	2	3	59.6	11.1	7.9	48.328	433	433;448;153;180;198;120	5.41				5	10	8	4				10	17	0	0.80759	1.0174	30.705	27	0.76332	1.0427	0.0603241	29.354	10	0.85675	0.98045	0.028484
O00410;H0Y8C6;O00410-3;B4E0R6;O00410-2;E7ETV3;C9JMV5;E7EQT5;H0Y3V4;C9JZD8;E7EWK4;E7EX05;E7EV12;C9JZ53;C9JQT6;E7ESA1;E7ESZ1;E7ETV8;C9J875	O00410;H0Y8C6;O00410-3;B4E0R6;O00410-2	26;24;24;22;22;7;6;5;5;4;3;3;3;2;2;2;2;2;1	26;24;24;22;22;7;6;5;5;4;3;3;3;2;2;2;2;2;1	25;23;23;21;21;7;6;5;5;4;3;3;3;2;2;2;2;2;1	Importin-5	IPO5	>sp|O00410|IPO5_HUMAN Importin-5 OS=Homo sapiens GN=IPO5 PE=1 SV=4;>tr|H0Y8C6|H0Y8C6_HUMAN Importin-5 (Fragment) OS=Homo sapiens GN=IPO5 PE=4 SV=1;>sp|O00410-3|IPO5_HUMAN Isoform 3 of Importin-5 OS=Homo sapiens GN=IPO5;>tr|B4E0R6|B4E0R6_HUMAN Importin-5 OS	19	26	26	25	2	25	2	25	2	24	33.4	33.4	32.3	123.63	1097	1097;1099;1115;972;1037;170;165;126;182;74;117;119;142;77;88;98;106;129;75	3.78			35	36	7	2	2				8	74	3.3656e-254	0.92436	1.0868	13.685	80	0.65383	0.87753	-0.18848	15.409	8	0.94332	1.097	-0.133564
P78371;F5GWF6;P78371-2;F8VQ14	P78371;F5GWF6;P78371-2;F8VQ14	26;25;24;22	26;25;24;22	26;25;24;22	T-complex protein 1 subunit beta	CCT2	>sp|P78371|TCPB_HUMAN T-complex protein 1 subunit beta OS=Homo sapiens GN=CCT2 PE=1 SV=4;>tr|F5GWF6|F5GWF6_HUMAN T-complex protein 1 subunit beta OS=Homo sapiens GN=CCT2 PE=2 SV=2;>sp|P78371-2|TCPB_HUMAN Isoform 2 of T-complex protein 1 subunit beta OS=Hom	4	26	26	26	5	26	5	26	5	26	61.9	61.9	61.9	57.488	535	535;530;488;416	5.11			1	20	42	18	7				21	67	3.1449e-235	0.98792	1.1074	21.491	87	0.67161	0.91587	-0.126785	12.06	21	1.034	1.1514	-0.203389
P43243;A8MXP9;D6REM6;D6R991;B3KM87;P43243-2;H0Y8T4;D6R8Z5;D6RCM3;D6REK4;D6RB45;D6R9F3;D6RBS2;D6RBI2;D6RBK5;D6RE02;D6RIA2;D6RAM9;D6RAY2	P43243;A8MXP9;D6REM6;D6R991	26;26;24;20;9;9;8;5;4;4;3;3;3;3;3;3;3;2;2	26;26;24;20;9;9;8;5;4;4;3;3;3;3;3;3;3;2;2	26;26;24;20;9;9;8;5;4;4;3;3;3;3;3;3;3;2;2	Matrin-3	MATR3	>sp|P43243|MATR3_HUMAN Matrin-3 OS=Homo sapiens GN=MATR3 PE=1 SV=2;>tr|A8MXP9|A8MXP9_HUMAN Matrin-3 OS=Homo sapiens GN=MATR3 PE=2 SV=1;>tr|D6REM6|D6REM6_HUMAN Matrin-3 OS=Homo sapiens GN=MATR3 PE=2 SV=1;>tr|D6R991|D6R991_HUMAN Matrin-3 (Fragment) OS=Homo s	19	26	26	26	20	16	20	16	20	16	38.6	38.6	38.6	94.622	847	847;895;794;433;509;559;334;107;99;100;47;78;87;109;121;125;172;81;86	3.79		2	49	38	8	5	3	1			68	38	3.1264e-145	0.82337	1.0565	14.566	106	0.74933	0.98104	-0.0276161	14.643	68	0.9819	1.171	-0.227741
Q07065	Q07065	26	26	26	Cytoskeleton-associated protein 4	CKAP4	>sp|Q07065|CKAP4_HUMAN Cytoskeleton-associated protein 4 OS=Homo sapiens GN=CKAP4 PE=1 SV=2	1	26	26	26	11	20	11	20	11	20	53.8	53.8	53.8	66.022	602	602	4.72				25	33	5	1				18	46	1.401e-186	0.99302	1.1619	26.966	64	0.58082	0.83685	-0.256959	29.334	18	1.0624	1.2141	-0.279887
Q01518-2;Q5T0R9	Q01518-2;Q5T0R9	26;13	1;1	1;1		CAP1	>sp|Q01518-2|CAP1_HUMAN Isoform 2 of Adenylyl cyclase-associated protein 1 OS=Homo sapiens GN=CAP1;>tr|Q5T0R9|Q5T0R9_HUMAN Adenylyl cyclase-associated protein 1 (Fragment) OS=Homo sapiens GN=CAP1 PE=2 SV=1	2	26	1	1	11	24	1	1	1	1	62	4.6	4.6	51.83	474	474;263	5				1	3	1					2	3	2.8078e-226	1.1969	1.2862	37.086	5	0.53853	0.69074	-0.533785	10.151	2	1.2029	1.2937	-0.371503
Q01518;Q5T0R1;Q5T0R7;Q5T0R6;Q5T0R5;Q5T0R4;Q5T0R3;Q5T0R2;Q5T0S3;Q5T0R8;B7Z214	Q01518;Q5T0R1	26;13;12;12;12;12;12;12;7;3;1	26;13;12;12;12;12;12;12;7;3;1	1;1;1;1;1;1;1;1;0;0;0	Adenylyl cyclase-associated protein 1	CAP1	>sp|Q01518|CAP1_HUMAN Adenylyl cyclase-associated protein 1 OS=Homo sapiens GN=CAP1 PE=1 SV=5;>tr|Q5T0R1|Q5T0R1_HUMAN Adenylyl cyclase-associated protein 1 (Fragment) OS=Homo sapiens GN=CAP1 PE=2 SV=1	11	26	26	1	11	24	11	24	1	1	62.1	62.1	4.8	51.901	475	475;215;174;176;180;202;203;208;145;58;217	4.92	2	3	2	31	48	26	7	1			28	92	1.2707e-234	1.1064	1.2595	35.03	118	0.56733	0.78227	-0.354261	18.362	28	1.1788	1.3013	-0.379954
P63104;E7EX29;B0AZS6;P63104-2;E7EX24;B7Z2E6;H0YB80;E7ESK7;E9PD24;E7EVZ2;E5RIR4;E5RGE1	P63104;E7EX29;B0AZS6;P63104-2;E7EX24;B7Z2E6;H0YB80;E7ESK7	26;21;17;15;15;14;14;13;10;10;9;6	23;18;16;14;14;13;13;11;8;8;7;4	17;12;12;10;10;9;9;8;6;6;5;3	14-3-3 protein zeta/delta	YWHAZ	>sp|P63104|1433Z_HUMAN 14-3-3 protein zeta/delta OS=Homo sapiens GN=YWHAZ PE=1 SV=1;>tr|E7EX29|E7EX29_HUMAN 14-3-3 protein zeta/delta (Fragment) OS=Homo sapiens GN=YWHAZ PE=2 SV=1;>tr|B0AZS6|B0AZS6_HUMAN 14-3-3 protein zeta/delta OS=Homo sapiens GN=YWHAZ P	12	26	23	17	12	24	10	21	8	17	89.8	89.8	65.7	27.745	245	245;246;168;170;170;125;130;137;92;98;75;52	6.65					6	36	44	6		3	24	71	4.7604e-304	1.203	1.3141	34.962	92	0.54106	0.76523	-0.386035	21.204	24	1.2661	1.3695	-0.453649
B7Z468;E7EN75;D6RGF7;D6RBR1	B7Z468	25;7;5;5	1;1;1;1	1;1;1;1		CAST	>tr|B7Z468|B7Z468_HUMAN DNA-directed RNA polymerase I subunit RPA34 OS=Homo sapiens GN=CAST PE=2 SV=1	4	25	1	1	20	12	1	0	1	0	41.1	1.1	1.1	80.998	754	754;156;149;150	3.5			1	1							2		4.5833e-176	0.98669	1.1987	10.322	2	0.98669	1.1987	0.261471	10.322	2	NaN	NaN	#VALUE!
P51911;B4DUX6;B7Z7E1;K7EQ72;K7ER02;K7ENC5;K7ERM8;K7ERK4;K7ESJ2	P51911;B4DUX6;B7Z7E1	25;21;13;7;7;5;5;5;4	25;21;13;7;7;5;5;5;4	25;21;13;7;7;5;5;5;4	Calponin-1	CNN1	>sp|P51911|CNN1_HUMAN Calponin-1 OS=Homo sapiens GN=CNN1 PE=1 SV=2;>tr|B4DUX6|B4DUX6_HUMAN Calponin-1 OS=Homo sapiens GN=CNN1 PE=2 SV=1;>tr|B7Z7E1|B7Z7E1_HUMAN Calponin-1 OS=Homo sapiens GN=CNN1 PE=2 SV=1	9	25	25	25	20	17	20	17	20	17	75.4	75.4	75.4	33.17	297	297;277;247;173;228;116;120;175;115	6.37					13	54	45	6			63	55	5.8558e-201	1.5865	2.247	96.644	114	1.7964	2.5228	1.33503	25.944	61	0.35257	0.38984	1.35905
O14974-4;O14974-3;O14974;O14974-5;O14974-2;F8VZN8;H0YHI8;H0YIS4;H0YIS3;H0YIM2;F8VW28;H0YHL8;H0YIL7;O60237-4;O60237;F8W8M3	O14974-4;O14974-3;O14974;O14974-5;O14974-2;F8VZN8	25;25;25;23;23;16;10;8;6;5;2;2;1;1;1;1	25;25;25;23;23;16;10;8;6;5;2;2;1;1;1;1	25;25;25;23;23;16;10;8;6;5;2;2;1;1;1;1	Protein phosphatase 1 regulatory subunit 12A	PPP1R12A	>sp|O14974-4|MYPT1_HUMAN Isoform 4 of Protein phosphatase 1 regulatory subunit 12A OS=Homo sapiens GN=PPP1R12A;>sp|O14974-3|MYPT1_HUMAN Isoform 3 of Protein phosphatase 1 regulatory subunit 12A OS=Homo sapiens GN=PPP1R12A;>sp|O14974|MYPT1_HUMAN Protein pho	16	25	25	25	12	19	12	19	12	19	26.2	26.2	26.2	109.1	971	971;974;1030;943;995;692;367;299;234;188;97;210;161;208;982;982	3.38		2	35	14	3	1					31	24	2.2174e-130	0.94567	1.1129	35.984	55	0.98017	1.2478	0.319387	19.409	31	0.54859	0.67619	0.564499
Q8N163;Q8N163-2;H0YB24;G3V119;E5RFJ3;H0YC69;E5RGU7;H0YC58;E5RHJ4;E5RHH8	Q8N163;Q8N163-2;H0YB24	25;24;13;12;7;6;6;6;6;2	25;24;13;12;7;6;6;6;6;2	25;24;13;12;7;6;6;6;6;2	DBIRD complex subunit KIAA1967	KIAA1967	>sp|Q8N163|K1967_HUMAN DBIRD complex subunit KIAA1967 OS=Homo sapiens GN=KIAA1967 PE=1 SV=2;>sp|Q8N163-2|K1967_HUMAN Isoform 2 of DBIRD complex subunit KIAA1967 OS=Homo sapiens GN=KIAA1967;>tr|H0YB24|H0YB24_HUMAN DBIRD complex subunit KIAA1967 (Fragment) O	10	25	25	25	7	23	7	23	7	23	41.4	41.4	41.4	102.9	923	923;923;615;598;162;148;150;183;277;81	3.23			32	5	2						13	26	8.5842e-175	0.6481	0.74732	22.881	39	0.93921	1.0562	0.078883	18.999	13	0.60758	0.71916	0.475615
P50395;E7EU23;P50395-2;Q5SX87;Q5SX90;Q5SX86;Q5SX91	P50395;E7EU23;P50395-2;Q5SX87	25;25;20;16;10;10;7	25;25;20;16;10;10;7	16;16;13;10;6;6;2	Rab GDP dissociation inhibitor beta	GDI2	>sp|P50395|GDIB_HUMAN Rab GDP dissociation inhibitor beta OS=Homo sapiens GN=GDI2 PE=1 SV=2;>tr|E7EU23|E7EU23_HUMAN Rab GDP dissociation inhibitor beta OS=Homo sapiens GN=GDI2 PE=2 SV=1;>sp|P50395-2|GDIB_HUMAN Isoform 2 of Rab GDP dissociation inhibitor be	7	25	25	16	3	25	3	25	2	16	61.1	61.1	39.6	50.663	445	445;449;400;263;148;155;203	5.4	1	1		12	43	38	12				6	101	1.018e-283	0.66436	0.74794	16.001	106	0.75691	1.0734	0.102188	11.84	6	0.66252	0.74421	0.426218
P18669;Q8N0Y7;P15259	P18669	25;11;10	25;11;10	25;11;10	Phosphoglycerate mutase 1	PGAM1	>sp|P18669|PGAM1_HUMAN Phosphoglycerate mutase 1 OS=Homo sapiens GN=PGAM1 PE=1 SV=2	3	25	25	25	21	20	21	20	21	20	90.9	90.9	90.9	28.804	254	254;254;253	6.65					2	60	73	2	2	3	50	92	4.3915e-259	0.74993	0.83346	23.934	141	0.81483	1.1534	0.205893	14.609	50	0.72496	0.78871	0.342433
P23526;P23526-2	P23526;P23526-2	25;18	25;18	25;18	Adenosylhomocysteinase	AHCY	>sp|P23526|SAHH_HUMAN Adenosylhomocysteinase OS=Homo sapiens GN=AHCY PE=1 SV=4;>sp|P23526-2|SAHH_HUMAN Isoform 2 of Adenosylhomocysteinase OS=Homo sapiens GN=AHCY	2	25	25	25	11	20	11	20	11	20	44.4	44.4	44.4	47.716	432	432;404	5.78				1	36	43	17				37	60	1.792e-116	0.77376	0.85683	19.738	97	0.80562	1.1487	0.200002	11.71	37	0.75602	0.82211	0.282597
P27824;B4DGP8;B4E2T8;H0Y9Q7;D6RGY2;D6RAU8;D6RB85;D6RDP7;D6RFL1;H0Y9H1;D6RAQ8;D6RHJ3;D6RD16	P27824;B4DGP8;B4E2T8	25;25;20;10;10;8;8;8;6;5;3;2;2	25;25;20;10;10;8;8;8;6;5;3;2;2	25;25;20;10;10;8;8;8;6;5;3;2;2	Calnexin	CANX	>sp|P27824|CALX_HUMAN Calnexin OS=Homo sapiens GN=CANX PE=1 SV=2;>tr|B4DGP8|B4DGP8_HUMAN Calnexin OS=Homo sapiens GN=CANX PE=2 SV=1;>tr|B4E2T8|B4E2T8_HUMAN Calnexin OS=Homo sapiens GN=CANX PE=2 SV=1	13	25	25	25	9	21	9	21	9	21	43.6	43.6	43.6	67.567	592	592;627;484;170;308;134;144;168;131;190;107;79;96	3.91			23	42	10	3					10	68	3.42e-153	0.77149	0.93465	15.703	75	0.7298	0.96632	-0.0494271	20.135	10	0.78635	0.93454	0.0976717
P31948;G3XAD8;F5H0T1;F5H783;F5GXD8;H0YGI8	P31948;G3XAD8;F5H0T1;F5H783	25;23;18;16;12;4	25;23;18;16;12;4	25;23;18;16;12;4	Stress-induced-phosphoprotein 1	STIP1	>sp|P31948|STIP1_HUMAN Stress-induced-phosphoprotein 1 OS=Homo sapiens GN=STIP1 PE=1 SV=1;>tr|G3XAD8|G3XAD8_HUMAN Stress-induced-phosphoprotein 1 OS=Homo sapiens GN=STIP1 PE=2 SV=1;>tr|F5H0T1|F5H0T1_HUMAN Stress-induced-phosphoprotein 1 OS=Homo sapiens GN=	6	25	25	25	24	11	24	11	24	11	37.2	37.2	37.2	62.639	543	543;590;519;236;138;137	4.87				27	45	10	3				61	24	2.8847e-75	0.69496	0.95766	15.825	85	0.6785	0.94581	-0.0803777	13.739	61	0.9323	1.0607	-0.0850167
Q9Y678;D6RG17;H0Y8X7	Q9Y678	25;3;3	25;3;3	23;3;3	Coatomer subunit gamma-1	COPG1	>sp|Q9Y678|COPG1_HUMAN Coatomer subunit gamma-1 OS=Homo sapiens GN=COPG1 PE=1 SV=1	3	25	25	23	13	18	13	18	12	17	39.6	39.6	37.3	97.717	874	874;49;188	3.92			15	39	10						26	38	1.3299e-152	0.89713	1.0172	17.567	61	0.67453	0.85818	-0.220648	15.483	25	0.92888	1.069	-0.0962619
Q14195-2;Q14195;F5GWI3;H0YBT4;D6RF19;H0YB87;Q14117	Q14195-2;Q14195	25;18;9;7;2;1;1	25;18;9;7;2;1;1	21;14;6;3;2;1;0	Dihydropyrimidinase-related protein 3	DPYSL3	>sp|Q14195-2|DPYL3_HUMAN Isoform LCRMP-4 of Dihydropyrimidinase-related protein 3 OS=Homo sapiens GN=DPYSL3;>sp|Q14195|DPYL3_HUMAN Dihydropyrimidinase-related protein 3 OS=Homo sapiens GN=DPYSL3 PE=1 SV=1	7	25	25	21	13	20	13	20	12	17	49.1	49.1	43.6	73.91	684	684;570;196;209;92;75;519	4.54			1	36	26	3	2				33	35	9.4853e-122	0.82722	0.97779	30.889	68	0.61076	0.83306	-0.263508	39.918	33	0.9479	1.0756	-0.105142
Q13509;A8K854;G3V2A3;G3V5W4;G3V2R8;G3V3R4;G3V2N6;G3V542;G3V3J6;G3V3W7	Q13509;A8K854	25;21;9;4;4;4;4;1;1;1	11;8;3;3;3;3;3;1;1;1	8;5;3;3;3;3;3;1;1;1	Tubulin beta-3 chain	TUBB3	>sp|Q13509|TBB3_HUMAN Tubulin beta-3 chain OS=Homo sapiens GN=TUBB3 PE=1 SV=2;>tr|A8K854|A8K854_HUMAN HCG1983504, isoform CRA_f OS=Homo sapiens GN=TUBB3 PE=2 SV=1	10	25	11	8	12	23	4	10	2	7	60	34.4	29.8	50.432	450	450;378;189;97;118;148;164;46;55;87	5.15				10	17	10	3				10	30	9.9306e-228	0.98222	1.088	14.247	40	0.68966	0.97879	-0.0309287	15.963	10	0.99427	1.1245	-0.169284
Q02878;F8W181;F8VZ45;F8VWR1;F8VZA3;F8VR69;F8VRY1	Q02878;F8W181	25;22;9;6;5;3;2	25;22;9;6;5;3;2	25;22;9;6;5;3;2	60S ribosomal protein L6	RPL6	>sp|Q02878|RL6_HUMAN 60S ribosomal protein L6 OS=Homo sapiens GN=RPL6 PE=1 SV=3;>tr|F8W181|F8W181_HUMAN 60S ribosomal protein L6 (Fragment) OS=Homo sapiens GN=RPL6 PE=2 SV=1	7	25	25	25	20	15	20	15	20	15	58.7	58.7	58.7	32.728	288	288;226;159;114;105;64;72	5.64	4	4	3	7	25	52	35	1			73	58	1.0531e-126	0.68716	0.96161	20.698	130	0.61565	0.87417	-0.194014	15.201	73	1.0236	1.1373	-0.185613
P38646;D6RJI2;D6RA73;H0Y8S0;H0YBG6	P38646	25;8;5;2;2	25;8;5;2;2	25;8;5;2;2	Stress-70 protein, mitochondrial	HSPA9	>sp|P38646|GRP75_HUMAN Stress-70 protein, mitochondrial OS=Homo sapiens GN=HSPA9 PE=1 SV=2	5	25	25	25	19	19	19	19	19	19	40.6	40.6	40.6	73.68	679	679;95;62;102;163	4.76				40	38	12	3				58	35	1.1614e-141	0.71651	0.97435	20.907	93	0.6445	0.86055	-0.216669	20.269	58	1.0051	1.1587	-0.212507
P50990;B4DEM7;B4DQH4;H7C4C8;H7C2U0	P50990;B4DEM7;B4DQH4;H7C4C8	25;23;19;13;4	25;23;19;13;4	25;23;19;13;4	T-complex protein 1 subunit theta	CCT8	>sp|P50990|TCPQ_HUMAN T-complex protein 1 subunit theta OS=Homo sapiens GN=CCT8 PE=1 SV=4;>tr|B4DEM7|B4DEM7_HUMAN T-complex protein 1 subunit theta OS=Homo sapiens GN=CCT8 PE=2 SV=1;>tr|B4DQH4|B4DQH4_HUMAN T-complex protein 1 subunit theta OS=Homo sapiens	5	25	25	25	8	24	8	24	8	24	48.9	48.9	48.9	59.62	548	548;529;475;323;107	4.93				21	32	14	1				11	57	9.7016e-126	1.0972	1.1865	30.975	68	0.61229	0.85784	-0.22122	67.661	11	1.1141	1.2058	-0.269991
O95425-2	O95425-2	24	1	1			>sp|O95425-2|SVIL_HUMAN Isoform 2 of Supervillin OS=Homo sapiens GN=SVIL	1	24	1	1	16	14	1	0	1	0	17.5	1.3	1.3	200.84	1788	1788	3			1								1		7.817e-117	0.48996	0.53912	NaN	1	0.48996	0.53912	-0.891322	NaN	1	NaN	NaN	#VALUE!
P04040	P04040	24	24	24	Catalase	CAT	>sp|P04040|CATA_HUMAN Catalase OS=Homo sapiens GN=CAT PE=1 SV=3	1	24	24	24	13	21	13	21	13	21	47.4	47.4	47.4	59.755	527	527	4.94				14	43	10					25	42	6.1234e-167	0.28448	0.33093	113.08	66	2.0058	2.831	1.50131	15.304	25	0.24675	0.27844	1.84456
Q13423;E9PCX7;D6RAI5;D6RHU2;D6RCR6;H0Y8P5	Q13423;E9PCX7;D6RAI5	24;17;12;10;3;2	24;17;12;10;3;2	24;17;12;10;3;2	NAD(P) transhydrogenase, mitochondrial	NNT	>sp|Q13423|NNTM_HUMAN NAD(P) transhydrogenase, mitochondrial OS=Homo sapiens GN=NNT PE=1 SV=3;>tr|E9PCX7|E9PCX7_HUMAN NAD(P) transhydrogenase, mitochondrial OS=Homo sapiens GN=NNT PE=2 SV=1;>tr|D6RAI5|D6RAI5_HUMAN NAD(P) transhydrogenase, mitochondrial (Fr	6	24	24	24	9	21	9	21	9	21	27.4	27.4	27.4	113.89	1086	1086;955;217;199;58;57	1.86	31	23	15	3							18	54	1.2874e-171	0.48483	0.70961	53.466	72	1.3408	1.4383	0.524365	15.996	18	0.45885	0.62374	0.680983
Q92878;Q92878-2;Q92878-3;E7EN38;E7ESD9;H7C0V2;H7C0P8;C9JNH8;E9PM98	Q92878;Q92878-2;Q92878-3;E7EN38	24;24;22;12;11;3;3;1;1	24;24;22;12;11;3;3;1;1	24;24;22;12;11;3;3;1;1	DNA repair protein RAD50	RAD50	>sp|Q92878|RAD50_HUMAN DNA repair protein RAD50 OS=Homo sapiens GN=RAD50 PE=1 SV=1;>sp|Q92878-2|RAD50_HUMAN Isoform 2 of DNA repair protein RAD50 OS=Homo sapiens GN=RAD50;>sp|Q92878-3|RAD50_HUMAN Isoform 3 of DNA repair protein RAD50 OS=Homo sapiens GN=RAD	9	24	24	24	5	22	5	22	5	22	22.3	22.3	22.3	153.89	1312	1312;1318;1173;660;551;157;158;100;102	3.19			30	1				1			6	26	4.8e-203	0.57814	0.69049	30.057	31	0.94062	1.2074	0.271904	6.4954	6	0.56752	0.67309	0.571129
P11717	P11717	24	24	24	Cation-independent mannose-6-phosphate receptor	IGF2R	>sp|P11717|MPRI_HUMAN Cation-independent mannose-6-phosphate receptor OS=Homo sapiens GN=IGF2R PE=1 SV=3	1	24	24	24	4	24	4	24	4	24	11.1	11.1	11.1	274.37	2491	2491	1.93	9	30	6								8	37	2.1636e-94	0.64092	0.79583	29.537	42	0.97505	1.1696	0.226015	26.264	6	0.63241	0.77735	0.363364
O43491;E9PHY5;O43491-3;O43491-4;O43491-2;E9PII3;E9PK52;H0Y5B0;E9PQD2;Q6ZSX4;E9PJP4;E9PQN0;E9PRG1;E9PIG0;Q6R5J7;E9PMV8;E9PPC9;E9PN54;E9PMG5	O43491;E9PHY5;O43491-3;O43491-4;O43491-2;E9PII3;E9PK52	24;21;20;20;19;19;19;7;6;6;5;5;5;5;5;4;3;2;1	24;21;20;20;19;19;19;7;6;6;5;5;5;5;5;4;3;2;1	21;18;17;17;16;16;16;7;6;6;5;5;5;5;5;4;3;2;1	Band 4.1-like protein 2	EPB41L2	>sp|O43491|E41L2_HUMAN Band 4.1-like protein 2 OS=Homo sapiens GN=EPB41L2 PE=1 SV=1;>tr|E9PHY5|E9PHY5_HUMAN Band 4.1-like protein 2 OS=Homo sapiens GN=EPB41L2 PE=2 SV=1;>sp|O43491-3|E41L2_HUMAN Isoform 3 of Band 4.1-like protein 2 OS=Homo sapiens GN=EPB41L	19	24	24	21	11	18	11	18	11	15	31.5	31.5	29	112.59	1005	1005;935;747;852;673;706;811;380;179;201;118;127;153;162;383;268;126;240;224	3.28		1	30	7	1	1					20	20	9.2378e-92	0.74955	0.89241	21.909	39	0.85084	1.0308	0.0437644	28.277	19	0.71847	0.84489	0.243165
Q07157;G3V1L9;Q07157-2;G5E9E7;H0YKB1;H0Y3R8;H0YLT6	Q07157;G3V1L9;Q07157-2;G5E9E7	24;24;21;21;3;1;1	24;24;21;21;3;1;1	24;24;21;21;3;1;1	Tight junction protein ZO-1	TJP1	>sp|Q07157|ZO1_HUMAN Tight junction protein ZO-1 OS=Homo sapiens GN=TJP1 PE=1 SV=3;>tr|G3V1L9|G3V1L9_HUMAN Tight junction protein 1 (Zona occludens 1), isoform CRA_a OS=Homo sapiens GN=TJP1 PE=2 SV=1;>sp|Q07157-2|ZO1_HUMAN Isoform Short of Tight junction p	7	24	24	24	17	13	17	13	17	13	19.9	19.9	19.9	195.46	1748	1748;1768;1668;1692;383;227;231	2.91		22	23	10	2	1					41	17	6.5806e-114	0.87189	1.1148	25.737	58	0.91814	1.19	0.250962	26.116	41	0.69471	0.85555	0.225076
Q8WUF5;K7EN03;K7EPP1	Q8WUF5	24;7;3	24;7;3	24;7;3	RelA-associated inhibitor	PPP1R13L	>sp|Q8WUF5|IASPP_HUMAN RelA-associated inhibitor OS=Homo sapiens GN=PPP1R13L PE=1 SV=4	3	24	24	24	23	3	23	3	23	3	43.6	43.6	43.6	89.09	828	828;128;60	4.2			25	31	12	10	3				69	12	3.5376e-128	0.88028	1.1181	15.546	80	0.90342	1.1519	0.204015	12.47	68	0.76149	0.85896	0.219337
P13797;B7Z6M1;F8W8D8;B4DGB4;H7C4N2;B4DI60;C9JAM8;F2Z2Z9	P13797;B7Z6M1;F8W8D8;B4DGB4	24;23;22;22;8;5;2;1	24;23;22;22;8;5;2;1	19;18;17;17;6;5;0;1	Plastin-3	PLS3	>sp|P13797|PLST_HUMAN Plastin-3 OS=Homo sapiens GN=PLS3 PE=1 SV=4;>tr|B7Z6M1|B7Z6M1_HUMAN Plastin-3 OS=Homo sapiens GN=PLS3 PE=2 SV=1;>tr|F8W8D8|F8W8D8_HUMAN Plastin-3 OS=Homo sapiens GN=PLS3 PE=2 SV=1;>tr|B4DGB4|B4DGB4_HUMAN Plastin-3 OS=Homo sapiens GN=P	8	24	24	19	6	24	6	24	5	19	49.5	49.5	40.5	70.81	630	630;585;594;617;190;224;266;42	4.65				32	34	5	1				14	58	1.4313e-146	0.77739	0.89691	19.908	72	0.84089	1.1607	0.214995	22.943	14	0.76957	0.86945	0.201825
P61978;P61978-2;Q5T6W5;P61978-3;Q5T6W2;Q5T6W1	P61978;P61978-2;Q5T6W5;P61978-3;Q5T6W2	24;24;23;23;17;11	24;24;23;23;17;11	24;24;23;23;17;11	Heterogeneous nuclear ribonucleoprotein K	HNRNPK	>sp|P61978|HNRPK_HUMAN Heterogeneous nuclear ribonucleoprotein K OS=Homo sapiens GN=HNRNPK PE=1 SV=1;>sp|P61978-2|HNRPK_HUMAN Isoform 2 of Heterogeneous nuclear ribonucleoprotein K OS=Homo sapiens GN=HNRNPK;>tr|Q5T6W5|Q5T6W5_HUMAN Heterogeneous nuclear rib	6	24	24	24	16	19	16	19	16	19	55.5	55.5	55.5	50.976	463	463;464;428;440;379;306	5.28			1	37	54	33	16	5			70	76	1.0792e-184	0.85241	1.01	25.589	143	0.7824	1.0517	0.0727232	29.805	67	0.87296	0.99545	0.00657924
Q9H6S3;B7ZKL3;Q9H6S3-2;H0YD62;H0YF37;E9PN68;E9PLN2;E9PNT0;E9PLH1	Q9H6S3;B7ZKL3;Q9H6S3-2	24;23;12;3;3;1;1;1;1	24;23;12;3;3;1;1;1;1	24;23;12;3;3;1;1;1;1	Epidermal growth factor receptor kinase substrate 8-like protein 2	EPS8L2	>sp|Q9H6S3|ES8L2_HUMAN Epidermal growth factor receptor kinase substrate 8-like protein 2 OS=Homo sapiens GN=EPS8L2 PE=1 SV=2;>tr|B7ZKL3|B7ZKL3_HUMAN EPS8L2 protein OS=Homo sapiens GN=EPS8L2 PE=2 SV=1;>sp|Q9H6S3-2|ES8L2_HUMAN Isoform 2 of Epidermal growth	9	24	24	24	14	19	14	19	14	19	37.8	37.8	37.8	80.62	715	715;731;327;139;167;79;83;95;105	4.56				40	15	6	3				38	26	1.5425e-144	0.76182	0.98041	16.94	64	0.7144	0.93097	-0.103193	19.457	38	0.88058	1.0247	-0.0352016
Q92598-2;Q92598;Q92598-3;B4DYH1;B4DY72;Q5TBM3;R4GN69	Q92598-2;Q92598;Q92598-3;B4DYH1;B4DY72	24;24;23;23;19;5;3	22;22;21;21;17;5;3	22;22;21;21;17;5;3	Heat shock protein 105 kDa	HSPH1	>sp|Q92598-2|HS105_HUMAN Isoform Beta of Heat shock protein 105 kDa OS=Homo sapiens GN=HSPH1;>sp|Q92598|HS105_HUMAN Heat shock protein 105 kDa OS=Homo sapiens GN=HSPH1 PE=1 SV=1;>sp|Q92598-3|HS105_HUMAN Isoform 3 of Heat shock protein 105 kDa OS=Homo sapie	7	24	22	22	14	16	13	14	13	14	39.4	36.6	36.6	92.115	814	814;858;817;860;677;115;115	3.58			20	24	1						18	27	1.6809e-156	0.82005	0.9664	17.349	43	0.67004	0.86058	-0.216619	17.736	17	0.92019	1.0753	-0.104739
P26373;P26373-2;J3QSB4;J3KS98;H3BTH3;H3BUK8	P26373;P26373-2;J3QSB4	24;19;12;6;5;4	24;19;12;6;5;4	24;19;12;6;5;4	60S ribosomal protein L13	RPL13	>sp|P26373|RL13_HUMAN 60S ribosomal protein L13 OS=Homo sapiens GN=RPL13 PE=1 SV=4;>sp|P26373-2|RL13_HUMAN Isoform 2 of 60S ribosomal protein L13 OS=Homo sapiens GN=RPL13;>tr|J3QSB4|J3QSB4_HUMAN 60S ribosomal protein L13 (Fragment) OS=Homo sapiens GN=RPL13	6	24	24	24	21	14	21	14	21	14	68.7	68.7	68.7	24.261	211	211;164;126;78;63;54	6.53	1	1		1	2	32	48	7			59	33	6.5278e-84	0.6482	0.94441	24.505	92	0.61827	0.91409	-0.129592	16.844	59	0.99729	1.0837	-0.115965
Q9BUF5;K7ESM5;K7EL29;K7EN98;K7ESQ3;K7EQT3;K7EJ64;K7ERA8;K7EJZ4;K7ES63;K7EPE5	Q9BUF5;K7ESM5	24;17;8;6;5;5;5;5;5;5;5	14;7;8;6;5;5;5;5;5;4;5	11;4;6;6;5;5;5;5;5;1;5	Tubulin beta-6 chain	TUBB6	>sp|Q9BUF5|TBB6_HUMAN Tubulin beta-6 chain OS=Homo sapiens GN=TUBB6 PE=1 SV=1;>tr|K7ESM5|K7ESM5_HUMAN Tubulin beta-6 chain (Fragment) OS=Homo sapiens GN=TUBB6 PE=3 SV=1	11	24	14	11	12	23	6	13	4	10	64.3	43.9	37.9	49.857	446	446;338;130;136;96;104;104;110;115;116;141	5.24			1	15	28	22	6				22	50	1.9155e-250	0.97379	1.0677	18.609	72	0.63	0.86694	-0.205996	9.3465	22	1.0207	1.138	-0.186501
P40227;B4DPJ8;P40227-2;Q92526;Q92526-2;Q92526-3;J3KRI6	P40227;B4DPJ8;P40227-2	24;22;21;5;4;4;1	24;22;21;5;4;4;1	24;22;21;5;4;4;1	T-complex protein 1 subunit zeta	CCT6A	>sp|P40227|TCPZ_HUMAN T-complex protein 1 subunit zeta OS=Homo sapiens GN=CCT6A PE=1 SV=3;>tr|B4DPJ8|B4DPJ8_HUMAN T-complex protein 1 subunit zeta OS=Homo sapiens GN=CCT6A PE=2 SV=1;>sp|P40227-2|TCPZ_HUMAN Isoform 2 of T-complex protein 1 subunit zeta OS=H	7	24	24	24	7	21	7	21	7	21	57.3	57.3	57.3	58.024	531	531;500;486;530;485;493;128	5.01				28	38	19	5				18	72	3.8306e-177	1.0253	1.1545	21.562	90	0.65298	0.90764	-0.139808	10.832	18	1.0647	1.2	-0.263034
P05783;F8VZY9;CON__H-INV:HIT000015463;CON__Q92764;C4AM86;Q92764;CON__Q497I4	P05783;F8VZY9	24;21;2;2;2;2;2	22;19;2;1;1;1;1	16;13;2;1;1;1;1	Keratin, type I cytoskeletal 18	KRT18	>sp|P05783|K1C18_HUMAN Keratin, type I cytoskeletal 18 OS=Homo sapiens GN=KRT18 PE=1 SV=2;>tr|F8VZY9|F8VZY9_HUMAN Keratin, type I cytoskeletal 18 OS=Homo sapiens GN=KRT18 PE=2 SV=1	7	24	22	16	7	22	6	20	6	14	59.5	55.8	43.7	48.057	430	430;391;295;425;425;455;455	5.61				2	26	27	6				13	48	5.958e-181	1.4314	1.5603	40.816	61	0.43023	0.643	-0.637109	28.06	13	1.4727	1.6171	-0.693409
O95425;F5H2Q5;F5GXV0	O95425	24;7;5	24;7;5	1;0;0	Supervillin	SVIL	>sp|O95425|SVIL_HUMAN Supervillin OS=Homo sapiens GN=SVIL PE=1 SV=2	3	24	24	1	16	15	16	15	1	1	13.6	13.6	0.6	247.74	2214	2214;1128;585	2.67	1	18	22	3	1						24	21	1.1621e-117	0.96631	1.2009	64.54	45	0.47384	0.60852	-0.716623	53.908	24	1.3149	1.6612	-0.732226
Q9C0C2;E9PKK0;Q9C0C2-2;E9PKE7	Q9C0C2	24;9;5;3	24;9;5;3	24;9;5;3	182 kDa tankyrase-1-binding protein	TNKS1BP1	>sp|Q9C0C2|TB182_HUMAN 182 kDa tankyrase-1-binding protein OS=Homo sapiens GN=TNKS1BP1 PE=1 SV=4	4	24	24	24	17	11	17	11	17	11	17.6	17.6	17.6	181.79	1729	1729;243;778;143	2.44	1	27	13	4							31	14	9.141e-89	0.52007	0.64537	59.769	44	0.46427	0.5861	-0.770781	30.708	30	1.3418	1.7222	-0.784253
Q01995;H0YCU9;E9PJ32	Q01995;H0YCU9	23;17;11	23;17;11	22;16;11	Transgelin	TAGLN	>sp|Q01995|TAGL_HUMAN Transgelin OS=Homo sapiens GN=TAGLN PE=1 SV=4;>tr|H0YCU9|H0YCU9_HUMAN Transgelin (Fragment) OS=Homo sapiens GN=TAGLN PE=4 SV=1	3	23	23	22	12	21	12	21	12	20	77.1	77.1	77.1	22.611	201	201;151;91	7.29						28	55	31	3	9	31	95	2.102e-123	0.54169	0.57014	53.953	125	1.3166	1.8788	0.909811	15.887	30	0.51865	0.54944	0.863966
P50454;E9PPV6;E9PR70;E9PKH2;E9PK86;E9PMI5;E9PNX1;E9PJH8;E9PIG2;E9PRS3;E9PQ34;E9PLA6;H0YEP8	P50454;E9PPV6;E9PR70;E9PKH2;E9PK86;E9PMI5	23;17;15;12;12;12;10;9;9;9;6;4;2	23;17;15;12;12;12;10;9;9;9;6;4;2	23;17;15;12;12;12;10;9;9;9;6;4;2	Serpin H1	SERPINH1	>sp|P50454|SERPH_HUMAN Serpin H1 OS=Homo sapiens GN=SERPINH1 PE=1 SV=2;>tr|E9PPV6|E9PPV6_HUMAN Serpin H1 OS=Homo sapiens GN=SERPINH1 PE=2 SV=1;>tr|E9PR70|E9PR70_HUMAN Serpin H1 (Fragment) OS=Homo sapiens GN=SERPINH1 PE=2 SV=1;>tr|E9PKH2|E9PKH2_HUMAN Serpin	13	23	23	23	12	19	12	19	12	19	62.4	62.4	62.4	46.44	418	418;324;295;201;247;249;203;150;165;167;142;86;56	5.51	1		2	10	43	43	17				49	67	4.9736e-183	0.63655	0.737	45.032	116	1.0834	1.4791	0.56472	16.759	49	0.57345	0.63294	0.659859
Q16658;J3KNT0;C9JFC0;H7BYX5;C9JPH9	Q16658;J3KNT0	23;21;2;2;1	23;21;2;2;1	23;21;2;2;1	Fascin	FSCN1	>sp|Q16658|FSCN1_HUMAN Fascin OS=Homo sapiens GN=FSCN1 PE=1 SV=3;>tr|J3KNT0|J3KNT0_HUMAN Fascin OS=Homo sapiens GN=FSCN1 PE=3 SV=1	5	23	23	23	4	23	4	23	4	23	48.5	48.5	48.5	54.529	493	493;472;132;138;120	4.98				25	41	19	2				7	80	3.2133e-192	0.58251	0.66563	32.504	85	1.0537	1.4447	0.53077	9.5758	7	0.57457	0.64571	0.631042
Q9P0K7-4;Q9P0K7-3;E7EMX7;Q9P0K7;Q9P0K7-2;D6RB25;D6RBW6;D6RB27;D6R9G4;D6RBY4;D6REL2;D6R9G6;D6RF74;D6RE17	Q9P0K7-4;Q9P0K7-3;E7EMX7;Q9P0K7;Q9P0K7-2	23;23;23;23;23;1;1;1;1;1;1;1;1;1	23;23;23;23;23;1;1;1;1;1;1;1;1;1	23;23;23;23;23;1;1;1;1;1;1;1;1;1	Ankycorbin	RAI14	>sp|Q9P0K7-4|RAI14_HUMAN Isoform 4 of Ankycorbin OS=Homo sapiens GN=RAI14;>sp|Q9P0K7-3|RAI14_HUMAN Isoform 3 of Ankycorbin OS=Homo sapiens GN=RAI14;>tr|E7EMX7|E7EMX7_HUMAN Ankycorbin OS=Homo sapiens GN=RAI14 PE=2 SV=1;>sp|Q9P0K7|RAI14_HUMAN Ankycorbin OS=H	14	23	23	23	11	19	11	19	11	19	29.4	29.4	29.4	106.9	951	951;972;973;980;983;56;66;104;107;114;125;126;139;150	3.53	1		30	24	3	1					26	33	4.6766e-131	0.69463	0.87549	43.161	59	0.94685	1.1702	0.226755	16.055	26	0.58495	0.69753	0.519673
Q9NZN4;B4DNU6	Q9NZN4;B4DNU6	23;16	22;16	22;16	EH domain-containing protein 2	EHD2	>sp|Q9NZN4|EHD2_HUMAN EH domain-containing protein 2 OS=Homo sapiens GN=EHD2 PE=1 SV=2;>tr|B4DNU6|B4DNU6_HUMAN EH domain-containing protein 2 OS=Homo sapiens GN=EHD2 PE=2 SV=1	2	23	22	22	8	19	7	18	7	18	51.2	51.2	51.2	61.161	543	543;407	4.69				28	30	4	2				18	46	1.2741e-116	0.66663	0.74787	28.528	63	0.93484	1.2793	0.355355	16.218	18	0.61754	0.71096	0.49216
Q9UM54-6;E7EW20;Q9UM54-5;Q9UM54-2;Q9UM54-4;Q9UM54-1;Q9UM54;Q5JVM0	Q9UM54-6;E7EW20;Q9UM54-5;Q9UM54-2;Q9UM54-4;Q9UM54-1;Q9UM54	23;23;22;22;22;22;22;2	23;23;22;22;22;22;22;2	23;23;22;22;22;22;22;2	Unconventional myosin-VI	MYO6	>sp|Q9UM54-6|MYO6_HUMAN Isoform 6 of Unconventional myosin-VI OS=Homo sapiens GN=MYO6;>tr|E7EW20|E7EW20_HUMAN Unconventional myosin-VI OS=Homo sapiens GN=MYO6 PE=2 SV=1;>sp|Q9UM54-5|MYO6_HUMAN Isoform 5 of Unconventional myosin-VI OS=Homo sapiens GN=MYO6;>	8	23	23	23	5	20	5	20	5	20	21.6	21.6	21.6	148.66	1285	1285;1286;1253;1262;1285;1285;1294;174	3.15			30	3	1						11	23	2.0626e-98	0.61609	0.76458	26.853	34	0.89636	1.1415	0.190931	13.494	11	0.58166	0.71604	0.481888
Q92841;H3BLZ8;Q92841-1;Q92841-3;Q92841-2;C9JMU5;J3QSF1;J3KRZ1;G5E9L5	Q92841;H3BLZ8;Q92841-1;Q92841-3;Q92841-2;C9JMU5	23;23;21;21;20;20;2;2;1	23;23;21;21;20;20;2;2;1	19;19;17;17;17;17;0;0;1	Probable ATP-dependent RNA helicase DDX17	DDX17	>sp|Q92841|DDX17_HUMAN Probable ATP-dependent RNA helicase DDX17 OS=Homo sapiens GN=DDX17 PE=1 SV=2;>tr|H3BLZ8|H3BLZ8_HUMAN Probable ATP-dependent RNA helicase DDX17 OS=Homo sapiens GN=DDX17 PE=2 SV=1;>sp|Q92841-1|DDX17_HUMAN Isoform 2 of Probable ATP-depe	9	23	23	19	13	16	13	16	12	12	35.7	35.7	29.9	80.272	729	729;731;650;652;652;652;153;166;181	4.73				31	22	6	4				37	26	4.9616e-105	0.92824	1.1905	30.149	62	0.99795	1.3316	0.413161	16.166	37	0.65206	0.75682	0.401978
P30041	P30041	23	23	23	Peroxiredoxin-6	PRDX6	>sp|P30041|PRDX6_HUMAN Peroxiredoxin-6 OS=Homo sapiens GN=PRDX6 PE=1 SV=3	1	23	23	23	9	21	9	21	9	21	83	83	83	25.035	224	224	6.75						25	38	2		2	16	51	6.4365e-172	0.75645	0.81829	21.849	67	0.85219	1.2025	0.266037	7.3179	16	0.73987	0.79758	0.326299
Q15942;H0Y2Y8;B4DQX7;B4DQR8;C9IZ41;H7C3R3;C9JJK5;H7C3D3	Q15942;H0Y2Y8;B4DQX7	23;18;12;11;9;5;4;4	23;18;12;11;9;5;4;4	23;18;12;11;9;5;4;4	Zyxin	ZYX	>sp|Q15942|ZYX_HUMAN Zyxin OS=Homo sapiens GN=ZYX PE=1 SV=1;>tr|H0Y2Y8|H0Y2Y8_HUMAN Zyxin (Fragment) OS=Homo sapiens GN=ZYX PE=2 SV=1;>tr|B4DQX7|B4DQX7_HUMAN Zyxin OS=Homo sapiens GN=ZYX PE=2 SV=1	8	23	23	23	21	17	21	17	21	17	40.2	40.2	40.2	61.277	572	572;540;415;485;164;178;171;176	4.73		1	13	65	46	30	10				123	42	3.6133e-204	0.85727	1.1444	25.262	162	0.87992	1.2337	0.302992	18.614	121	0.70125	0.80083	0.320432
P11940;P11940-2;E7EQV3;E7ERJ7;H0YAR2;Q9H361;H0YAP2;H0YBN4;H3BNY3;E5RGH3;E5RJB9;H0YB86;H0YAS6;H0YB75;E5RH24;H3BPI5;H0YAS7;Q4VY17;Q4VXU2;H0YC10;E5RHG7;H0YEQ8;H0YAW6;E5RGC4;E5RFD8;H0YER0;Q5JQF8;Q96DU9-2;Q96DU9	P11940;P11940-2;E7EQV3;E7ERJ7	23;22;22;21;10;10;7;7;6;5;5;5;5;5;4;4;3;3;3;2;2;2;2;1;1;1;1;1;1	23;22;22;21;10;10;7;7;6;5;5;5;5;5;4;4;3;3;3;2;2;2;2;1;1;1;1;1;1	18;17;17;17;9;10;7;4;6;2;2;5;4;4;2;4;2;3;3;2;1;0;2;1;1;0;1;1;1	Polyadenylate-binding protein 1	PABPC1	>sp|P11940|PABP1_HUMAN Polyadenylate-binding protein 1 OS=Homo sapiens GN=PABPC1 PE=1 SV=2;>sp|P11940-2|PABP1_HUMAN Isoform 2 of Polyadenylate-binding protein 1 OS=Homo sapiens GN=PABPC1;>tr|E7EQV3|E7EQV3_HUMAN Polyadenylate-binding protein 1 OS=Homo sapie	29	23	23	18	16	19	16	19	12	14	47.5	47.5	35.2	70.67	636	636;547;591;604;284;631;131;175;347;108;129;165;169;183;118;255;136;330;614;42;75;112;187;43;61;68;200;350;382	4.62			1	43	39	6	2				45	46	1.3717e-144	0.80826	1.0056	16.917	89	0.70058	0.93881	-0.0910949	13.412	43	0.93342	1.0782	-0.108625
Q9Y2W1	Q9Y2W1	23	23	22	Thyroid hormone receptor-associated protein 3	THRAP3	>sp|Q9Y2W1|TR150_HUMAN Thyroid hormone receptor-associated protein 3 OS=Homo sapiens GN=THRAP3 PE=1 SV=2	1	23	23	22	18	13	18	13	17	12	25.8	25.8	25.8	108.66	955	955	3.85		1	33	18	8	4	3				49	18	1.8677e-85	0.73012	0.88642	27.115	65	0.6703	0.84229	-0.247611	25.596	47	0.92375	1.1176	-0.160404
P04844;P04844-2;Q5JYR7;Q5JYR4;F2Z3K5;Q5JYR3;H0Y5M1	P04844;P04844-2	23;22;10;8;6;4;4	23;22;10;8;6;4;4	23;22;10;8;6;4;4	Dolichyl-diphosphooligosaccharide--protein glycosyltransferase subunit 2	RPN2	>sp|P04844|RPN2_HUMAN Dolichyl-diphosphooligosaccharide--protein glycosyltransferase subunit 2 OS=Homo sapiens GN=RPN2 PE=1 SV=3;>sp|P04844-2|RPN2_HUMAN Isoform 2 of Dolichyl-diphosphooligosaccharide--protein glycosyltransferase subunit 2 OS=Homo sapiens G	7	23	23	23	0	23	0	23	0	23	54.2	54.2	54.2	69.283	631	631;615;345;167;162;138;147	3.04	27	33	26	26	25	4	1					142	8.3709e-242	0.95234	1.1472	16.929	142	NaN	NaN	#VALUE!	NaN	0	0.95234	1.1472	-0.198117
P11216;H0Y4Z6	P11216	23;5	23;5	18;4	Glycogen phosphorylase, brain form	PYGB	>sp|P11216|PYGB_HUMAN Glycogen phosphorylase, brain form OS=Homo sapiens GN=PYGB PE=1 SV=5	2	23	23	18	2	23	2	23	2	18	33.1	33.1	26.8	96.695	843	843;245	3.86			9	30	3						2	40	1.0609e-111	0.97174	1.1405	14.502	42	0.62878	0.8486	-0.236843	8.6744	2	0.97672	1.1492	-0.20063
P48643;E7ENZ3;B7ZAR1;E9PCA1;B4DYD8;D6RIZ7;H0Y914	P48643;E7ENZ3;B7ZAR1;E9PCA1;B4DYD8	23;19;17;17;13;4;4	23;19;17;17;13;4;4	23;19;17;17;13;4;4	T-complex protein 1 subunit epsilon	CCT5	>sp|P48643|TCPE_HUMAN T-complex protein 1 subunit epsilon OS=Homo sapiens GN=CCT5 PE=1 SV=1;>tr|E7ENZ3|E7ENZ3_HUMAN T-complex protein 1 subunit epsilon OS=Homo sapiens GN=CCT5 PE=2 SV=1;>tr|B7ZAR1|B7ZAR1_HUMAN T-complex protein 1 subunit epsilon OS=Homo sa	7	23	23	23	8	20	8	20	8	20	52.7	52.7	52.7	59.67	541	541;486;503;520;448;44;62	4.92				24	37	10	4				18	57	2.776e-117	0.97469	1.1073	14.942	75	0.65428	0.93151	-0.102357	15.559	18	0.99913	1.1561	-0.209266
E9PEZ3;O60610;H9KV28;O60610-2;B9ZVX0;E9PHQ0;O60610-3;E7ET75;E7ERW8;E7EMV0;B4E2I7;E5RJ79	E9PEZ3;O60610;H9KV28;O60610-2;B9ZVX0;E9PHQ0;O60610-3;E7ET75;E7ERW8;E7EMV0	23;23;23;22;22;22;22;22;20;12;6;1	23;23;23;22;22;22;22;22;20;12;6;1	23;23;23;22;22;22;22;22;20;12;6;1	Protein diaphanous homolog 1	DIAPH1	>tr|E9PEZ3|E9PEZ3_HUMAN Protein diaphanous homolog 1 OS=Homo sapiens GN=DIAPH1 PE=2 SV=1;>sp|O60610|DIAP1_HUMAN Protein diaphanous homolog 1 OS=Homo sapiens GN=DIAPH1 PE=1 SV=2;>tr|H9KV28|H9KV28_HUMAN Protein diaphanous homolog 1 OS=Homo sapiens GN=DIAPH1	12	23	23	23	7	18	7	18	7	18	23.4	23.4	23.4	141.06	1269	1269;1272;1273;1248;1248;1260;1263;1264;1215;863;201;112	3.2			32	2				1			9	26	9.8757e-154	0.95559	1.1347	22.07	33	0.64074	0.78893	-0.342031	13.039	9	1.012	1.1744	-0.231924
O60841	O60841	23	23	23	Eukaryotic translation initiation factor 5B	EIF5B	>sp|O60841|IF2P_HUMAN Eukaryotic translation initiation factor 5B OS=Homo sapiens GN=EIF5B PE=1 SV=4	1	23	23	23	14	15	14	15	14	15	25.2	25.2	25.2	138.83	1220	1220	3.3		9	33	8	2	2	2				33	23	3.7499e-119	0.71316	0.95138	42.911	56	0.63496	0.71201	-0.490031	36.473	33	1.0007	1.2233	-0.290778
Q86XP3;Q86XP3-2;J3KTK9;J3QRI2;J3KRV0;J3KRE3	Q86XP3;Q86XP3-2	23;19;5;4;1;1	23;19;5;4;1;1	23;19;5;4;1;1	ATP-dependent RNA helicase DDX42	DDX42	>sp|Q86XP3|DDX42_HUMAN ATP-dependent RNA helicase DDX42 OS=Homo sapiens GN=DDX42 PE=1 SV=1;>sp|Q86XP3-2|DDX42_HUMAN Isoform 2 of ATP-dependent RNA helicase DDX42 OS=Homo sapiens GN=DDX42	6	23	23	23	17	13	17	13	17	13	33.7	33.7	33.7	102.97	938	938;819;159;104;70;99	3.5			26	26							32	20	1.9811e-88	0.66395	0.83545	27.05	50	0.60251	0.76906	-0.378832	16.863	30	1.0269	1.2443	-0.315334
J3KNL6;O15027-2;O15027-4;O15027-3;O15027;O15027-5;Q8N9G1	J3KNL6;O15027-2;O15027-4;O15027-3;O15027;O15027-5	23;18;18;18;18;17;3	23;18;18;18;18;17;3	23;18;18;18;18;17;3	Protein transport protein Sec16A	SEC16A	>tr|J3KNL6|J3KNL6_HUMAN Protein transport protein Sec16A OS=Homo sapiens GN=SEC16A PE=4 SV=1;>sp|O15027-2|SC16A_HUMAN Isoform 2 of Protein transport protein Sec16A OS=Homo sapiens GN=SEC16A;>sp|O15027-4|SC16A_HUMAN Isoform 4 of Protein transport protein Se	7	23	23	23	16	8	16	8	16	8	18.1	18.1	18.1	251.89	2357	2357;2134;2154;2159;2179;2201;385	2.44	6	26	14	4	1	1					37	15	1.4369e-88	0.55592	0.71534	36.227	51	0.54222	0.66437	-0.589941	22.344	37	1.06	1.2801	-0.356257
Q8WX93-3;Q8WX93;Q8WX93-4;Q8WX93-8;Q8WX93-5;Q8WX93-2;Q8WX93-9;Q8WX93-7;H0YA05;F8WA26;D6R9F5;D6R9Z5;D6RBH5;D6RBB1;F8WC13;H0Y952;Q8WX93-6	Q8WX93-3;Q8WX93;Q8WX93-4;Q8WX93-8;Q8WX93-5;Q8WX93-2;Q8WX93-9;Q8WX93-7	23;23;21;20;20;17;16;13;6;4;2;1;1;1;1;1;1	23;23;21;20;20;17;16;13;6;4;2;1;1;1;1;1;1	23;23;21;20;20;17;16;13;6;4;2;1;1;1;1;1;1	Palladin	PALLD	>sp|Q8WX93-3|PALLD_HUMAN Isoform 3 of Palladin OS=Homo sapiens GN=PALLD;>sp|Q8WX93|PALLD_HUMAN Palladin OS=Homo sapiens GN=PALLD PE=1 SV=3;>sp|Q8WX93-4|PALLD_HUMAN Isoform 4 of Palladin OS=Homo sapiens GN=PALLD;>sp|Q8WX93-8|PALLD_HUMAN Isoform 8 of Palladi	17	23	23	23	16	18	16	18	16	18	31.2	31.2	31.2	108.63	1001	1001;1383;672;777;1159;1106;1123;385;160;164;90;71;83;96;410;512;533	4.24			18	40	27	5	1				49	42	7.1774e-105	0.76649	0.95076	45.003	86	0.51518	0.69139	-0.532428	24.853	45	1.2048	1.3957	-0.480989
Q5SSJ5;Q5SSJ5-2;Q5SSJ5-3;B0QZK4;Q5SWC8;B0QZK9;B0QZK8;Q5SSJ5-5	Q5SSJ5;Q5SSJ5-2;Q5SSJ5-3;B0QZK4;Q5SWC8	22;19;17;16;13;3;3;3	22;19;17;16;13;3;3;3	22;19;17;16;13;3;3;3	Heterochromatin protein 1-binding protein 3	HP1BP3	>sp|Q5SSJ5|HP1B3_HUMAN Heterochromatin protein 1-binding protein 3 OS=Homo sapiens GN=HP1BP3 PE=1 SV=1;>sp|Q5SSJ5-2|HP1B3_HUMAN Isoform 2 of Heterochromatin protein 1-binding protein 3 OS=Homo sapiens GN=HP1BP3;>sp|Q5SSJ5-3|HP1B3_HUMAN Isoform 3 of Heteroc	8	22	22	22	16	18	16	18	16	18	37.1	37.1	37.1	61.206	553	553;515;401;253;278;76;124;133	4.72			3	36	24	12	4				55	24	2.9204e-90	0.91944	1.2185	37.81	78	0.9825	1.3393	0.421479	23.048	55	0.57594	0.67806	0.560515
P61981	P61981	22	17	15	14-3-3 protein gamma;14-3-3 protein gamma, N-terminally processed	YWHAG	>sp|P61981|1433G_HUMAN 14-3-3 protein gamma OS=Homo sapiens GN=YWHAG PE=1 SV=2	1	22	17	15	8	19	5	15	4	13	69.2	60.7	54.3	28.302	247	247	6.62						22	29	2			11	42	8.1103e-204	0.65848	0.71944	26.941	52	0.85994	1.2711	0.346078	12.904	11	0.62909	0.7138	0.486408
K7ENL3;P40763-2;P40763;G8JLH9;K7EP08	K7ENL3;P40763-2;P40763;G8JLH9	22;22;22;15;3	22;22;22;15;3	22;22;22;15;3	Signal transducer and activator of transcription 3	STAT3	>tr|K7ENL3|K7ENL3_HUMAN Signal transducer and activator of transcription 3 OS=Homo sapiens GN=STAT3 PE=4 SV=1;>sp|P40763-2|STAT3_HUMAN Isoform Del-701 of Signal transducer and activator of transcription 3 OS=Homo sapiens GN=STAT3;>sp|P40763|STAT3_HUMAN Sig	5	22	22	22	0	22	0	22	0	22	43.8	43.8	43.8	83.125	722	722;769;770;672;84	4			1	28	1							30	4.7767e-186	0.61786	0.71412	12.405	30	NaN	NaN	#VALUE!	NaN	0	0.61786	0.71412	0.485762
Q99439;B4DUT8;B4DDF4;Q99439-2;K7ES69;H3BQH0;H3BVI6;H3BTZ5;H3BQR6	Q99439;B4DUT8;B4DDF4;Q99439-2;K7ES69;H3BQH0;H3BVI6;H3BTZ5	22;22;21;18;13;12;12;11;2	22;22;21;18;13;12;12;11;2	21;21;20;17;12;12;12;11;2	Calponin-2	CNN2	>sp|Q99439|CNN2_HUMAN Calponin-2 OS=Homo sapiens GN=CNN2 PE=1 SV=4;>tr|B4DUT8|B4DUT8_HUMAN Calponin-2 OS=Homo sapiens GN=CNN2 PE=2 SV=1;>tr|B4DDF4|B4DDF4_HUMAN Calponin-2 OS=Homo sapiens GN=CNN2 PE=2 SV=1;>sp|Q99439-2|CNN2_HUMAN Isoform 2 of Calponin-2 OS=	9	22	22	21	13	16	13	16	12	15	77.7	77.7	77.7	33.697	309	309;330;298;270;148;212;218;191;66	6.19				1	18	48	32	4			43	60	1.5816e-176	0.72492	0.83095	39.325	102	1.0303	1.452	0.538041	16.956	43	0.66461	0.71574	0.482492
P09429;Q5T7C4;Q5T7C6;Q5T7C0;B2RPK0;P23497	P09429;Q5T7C4;Q5T7C6;Q5T7C0;B2RPK0	22;21;19;12;12;5	22;21;19;12;12;5	20;20;18;11;11;5	High mobility group protein B1;Putative high mobility group protein B1-like 1	HMGB1;HMGB1P1	>sp|P09429|HMGB1_HUMAN High mobility group protein B1 OS=Homo sapiens GN=HMGB1 PE=1 SV=3;>tr|Q5T7C4|Q5T7C4_HUMAN High mobility group protein B1 OS=Homo sapiens GN=HMGB1 PE=2 SV=1;>tr|Q5T7C6|Q5T7C6_HUMAN High mobility group protein B1 (Fragment) OS=Homo sap	6	22	22	20	22	13	22	13	20	12	45.1	45.1	37.7	24.893	215	215;158;162;97;211;879	6.66					2	30	64	1			55	42	2.4367e-104	0.79898	1.0912	27.849	94	0.85077	1.2777	0.353549	19.844	53	0.70399	0.77515	0.367453
Q14160;Q14160-3;Q14160-2;H0YCG0;H0YDF9;Q5T0G3;Q9BTT6-2;Q9BTT6	Q14160;Q14160-3;Q14160-2	22;22;20;10;1;1;1;1	22;22;20;10;1;1;1;1	22;22;20;10;1;1;1;1	Protein scribble homolog	SCRIB	>sp|Q14160|SCRIB_HUMAN Protein scribble homolog OS=Homo sapiens GN=SCRIB PE=1 SV=4;>sp|Q14160-3|SCRIB_HUMAN Isoform 3 of Protein scribble homolog OS=Homo sapiens GN=SCRIB;>sp|Q14160-2|SCRIB_HUMAN Isoform 2 of Protein scribble homolog OS=Homo sapiens GN=SCR	8	22	22	22	7	19	7	19	7	19	20.9	20.9	20.9	174.88	1630	1630;1655;1549;650;140;154;197;524	2.5	2	25	25	2							12	42	4.56e-144	0.68747	0.83143	21.622	54	0.8696	1.061	0.0854247	17.663	12	0.64596	0.80952	0.304861
Q9NTI5-2;Q9NTI5;A9IYQ1;Q9NTI5-3;Q9NTI5-5	Q9NTI5-2;Q9NTI5	22;22;7;5;3	22;22;7;5;3	22;22;7;5;3	Sister chromatid cohesion protein PDS5 homolog B	PDS5B	>sp|Q9NTI5-2|PDS5B_HUMAN Isoform 2 of Sister chromatid cohesion protein PDS5 homolog B OS=Homo sapiens GN=PDS5B;>sp|Q9NTI5|PDS5B_HUMAN Sister chromatid cohesion protein PDS5 homolog B OS=Homo sapiens GN=PDS5B PE=1 SV=1	5	22	22	22	5	17	5	17	5	17	23.1	23.1	23.1	158.28	1391	1391;1447;302;529;125	3.21			23	6							9	20	9.3651e-94	0.73295	0.8948	18.957	29	0.90375	1.017	0.0243197	15.898	9	0.65697	0.8343	0.261362
Q92538	Q92538	22	22	22	Golgi-specific brefeldin A-resistance guanine nucleotide exchange factor 1	GBF1	>sp|Q92538|GBF1_HUMAN Golgi-specific brefeldin A-resistance guanine nucleotide exchange factor 1 OS=Homo sapiens GN=GBF1 PE=1 SV=2	1	22	22	22	1	22	1	22	1	22	18.5	18.5	18.5	206.44	1859	1859	2.37	1	24	16								1	40	8.0774e-137	0.69423	0.85137	31.362	41	0.67393	0.84466	-0.243557	NaN	1	0.69746	0.85338	0.22874
Q04446;E9PGM4	Q04446;E9PGM4	22;20	22;20	22;20	1,4-alpha-glucan-branching enzyme	GBE1	>sp|Q04446|GLGB_HUMAN 1,4-alpha-glucan-branching enzyme OS=Homo sapiens GN=GBE1 PE=1 SV=3;>tr|E9PGM4|E9PGM4_HUMAN 1,4-alpha-glucan-branching enzyme OS=Homo sapiens GN=GBE1 PE=2 SV=1	2	22	22	22	9	20	9	20	9	20	45.2	45.2	45.2	80.473	702	702;661	4.61			2	34	34	4	2				26	50	2.4635e-97	0.77685	0.9277	18.347	73	0.6444	0.93538	-0.0963755	25.546	25	0.8053	0.91948	0.12111
P05556;P05556-2;P05556-5;P05556-4;P05556-3;E7EQW5;C9JPK5;Q5T3E6;E9PLR6;E7EUI6;E7ERX5;C9JJP8;Q5T3E5;E9PQJ2;H7C4N8	P05556;P05556-2;P05556-5;P05556-4;P05556-3	22;18;18;18;18;6;4;4;4;4;2;1;1;1;1	22;18;18;18;18;6;4;4;4;4;2;1;1;1;1	22;18;18;18;18;6;4;4;4;4;2;1;1;1;1	Integrin beta-1	ITGB1	>sp|P05556|ITB1_HUMAN Integrin beta-1 OS=Homo sapiens GN=ITGB1 PE=1 SV=2;>sp|P05556-2|ITB1_HUMAN Isoform Beta-1B of Integrin beta-1 OS=Homo sapiens GN=ITGB1;>sp|P05556-5|ITB1_HUMAN Isoform Beta-1D of Integrin beta-1 OS=Homo sapiens GN=ITGB1;>sp|P05556-4|IT	15	22	22	22	14	19	14	19	14	19	30.7	30.7	30.7	88.414	798	798;789;801;819;825;163;98;136;143;152;125;31;89;104;108	3.82	1	9	46	44	14	3	3	4			59	65	2.8805e-169	0.82595	0.97331	39.755	122	0.82595	1.01	0.0143553	47.012	58	0.82467	0.93573	0.0958358
Q96KP4;Q96KP4-2;J3QKT2;J3KSV5;J3QQN6;J3QR27;J3QLU1;J3QKQ0;J3QRD0;J3QL02;J3QRA8;J3KSS4;J3KRD5;J3QRH4;J3QRP4	Q96KP4;Q96KP4-2	22;18;9;8;7;7;7;7;7;7;5;4;4;2;1	22;18;9;8;7;7;7;7;7;7;5;4;4;2;1	22;18;9;8;7;7;7;7;7;7;5;4;4;2;1	Cytosolic non-specific dipeptidase	CNDP2	>sp|Q96KP4|CNDP2_HUMAN Cytosolic non-specific dipeptidase OS=Homo sapiens GN=CNDP2 PE=1 SV=2;>sp|Q96KP4-2|CNDP2_HUMAN Isoform 2 of Cytosolic non-specific dipeptidase OS=Homo sapiens GN=CNDP2	15	22	22	22	11	19	11	19	11	19	61.5	61.5	61.5	52.878	475	475;391;249;149;89;122;123;128;134;138;138;55;88;204;89	5.17				14	33	22	2				25	46	9.5347e-90	0.80266	0.97982	19.952	71	0.75128	1.0281	0.0399806	8.864	25	0.8564	0.94699	0.0785789
Q14847;Q14847-2;C9J9W2;B4DGQ0;F6S2S5;K7ESD6;J3KSN1;O76041-2	Q14847;Q14847-2;C9J9W2;B4DGQ0	22;21;20;15;5;2;2;1	22;21;20;15;5;2;2;1	22;21;20;15;5;2;2;1	LIM and SH3 domain protein 1	LASP1	>sp|Q14847|LASP1_HUMAN LIM and SH3 domain protein 1 OS=Homo sapiens GN=LASP1 PE=1 SV=2;>sp|Q14847-2|LASP1_HUMAN Isoform 2 of LIM and SH3 domain protein 1 OS=Homo sapiens GN=LASP1;>tr|C9J9W2|C9J9W2_HUMAN LIM and SH3 domain protein 1 (Fragment) OS=Homo sapie	8	22	22	22	20	14	20	14	20	14	54	54	54	29.717	261	261;323;166;205;91;71;105;270	6.28				1	22	53	43	6		1	82	44	4.3954e-107	0.74494	0.97836	14.552	122	0.69702	0.97876	-0.030973	14.833	82	0.90229	0.9673	0.0479647
Q9NQW6-2;Q9NQW6;H7C3S1;H7C1C2;H7C1K5;C9JJT6	Q9NQW6-2;Q9NQW6	22;22;6;4;4;2	22;22;6;4;4;2	22;22;6;4;4;2	Actin-binding protein anillin	ANLN	>sp|Q9NQW6-2|ANLN_HUMAN Isoform 2 of Actin-binding protein anillin OS=Homo sapiens GN=ANLN;>sp|Q9NQW6|ANLN_HUMAN Actin-binding protein anillin OS=Homo sapiens GN=ANLN PE=1 SV=2	6	22	22	22	11	14	11	14	11	14	23.7	23.7	23.7	120.01	1087	1087;1124;236;252;277;169	3.38		2	25	8	3	1					24	15	5.1251e-67	0.78474	0.963	21.274	39	0.7526	0.95473	-0.0668353	20.709	24	0.8012	0.98282	0.0250009
P40939;H0YFD6;B4DYP2	P40939	22;8;7	22;8;7	22;8;7	Trifunctional enzyme subunit alpha, mitochondrial;Long-chain enoyl-CoA hydratase;Long chain 3-hydroxyacyl-CoA dehydrogenase	HADHA	>sp|P40939|ECHA_HUMAN Trifunctional enzyme subunit alpha, mitochondrial OS=Homo sapiens GN=HADHA PE=1 SV=2	3	22	22	22	2	21	2	21	2	21	39.7	39.7	39.7	82.999	763	763;250;260	4.35			1	26	16						6	37	7.0601e-152	0.8952	1.0361	26.478	41	0.77665	0.99435	-0.00817434	8.8551	4	0.91663	1.041	-0.0579701
P68032;P63267;P62736;P68133;Q5T8M8;A6NL76;Q5T8M7;P63267-2;C9JFL5;F6UVQ4;F6QUT6;F8WB63;B8ZZJ2	P68032;P63267;P62736;P68133;Q5T8M8;A6NL76;Q5T8M7;P63267-2	22;20;20;20;17;17;16;14;10;10;10;9;9	4;3;3;4;3;3;1;2;2;2;2;1;1	4;3;3;4;3;3;1;2;2;2;2;1;1	Actin, alpha cardiac muscle 1;Actin, gamma-enteric smooth muscle;Actin, aortic smooth muscle;Actin, alpha skeletal muscle	ACTC1;ACTG2;ACTA2;ACTA1	>sp|P68032|ACTC_HUMAN Actin, alpha cardiac muscle 1 OS=Homo sapiens GN=ACTC1 PE=1 SV=1;>sp|P63267|ACTH_HUMAN Actin, gamma-enteric smooth muscle OS=Homo sapiens GN=ACTG2 PE=1 SV=1;>sp|P62736|ACTA_HUMAN Actin, aortic smooth muscle OS=Homo sapiens GN=ACTA2 PE	13	22	4	4	13	18	1	4	1	4	52	19.9	19.9	42.019	377	377;376;377;377;287;289;342;333;145;151;151;105;119	5.27	1	1	1	5	15	16	5				2	42	1.1942e-181	0.99776	1.1367	35.575	44	1.3861	1.8233	0.866552	10.959	2	0.99354	1.1191	-0.162339
E9PLK3;P55786;B7Z463;E5RJ24;E7EWZ2;A6NEC2;F5GZY4;H0YAQ6;H0YDG0;A6NEC2-2;H0YCQ5;E9PP11;E9PJY4;E9PJ74;E9PPD4;A6NEC2-3;L7N488;E9PRQ5	E9PLK3;P55786;B7Z463	22;22;20;7;7;7;6;5;4;4;2;2;1;1;1;1;1;1	22;22;20;7;7;7;6;5;4;4;2;2;1;1;1;1;1;1	22;22;20;7;7;7;6;5;4;4;2;2;1;1;1;1;1;1	Puromycin-sensitive aminopeptidase	NPEPPS	>tr|E9PLK3|E9PLK3_HUMAN Puromycin-sensitive aminopeptidase OS=Homo sapiens GN=NPEPPS PE=2 SV=1;>sp|P55786|PSA_HUMAN Puromycin-sensitive aminopeptidase OS=Homo sapiens GN=NPEPPS PE=1 SV=2;>tr|B7Z463|B7Z463_HUMAN Puromycin-sensitive aminopeptidase OS=Homo sa	18	22	22	22	6	20	6	20	6	20	31.4	31.4	31.4	102.99	915	915;919;839;471;478;478;324;431;169;263;65;201;141;158;163;163;167;172	3.75			17	31	2	1					9	42	2.5014e-102	0.94817	1.1067	21.875	51	0.62498	0.82274	-0.281492	12.486	9	0.98534	1.1377	-0.18612
P62701;Q8TD47;C9JEH7;P22090;A6NH36;C9JQ55	P62701;Q8TD47	22;11;10;10;7;3	22;11;10;10;7;3	22;11;10;10;7;3	40S ribosomal protein S4, X isoform;40S ribosomal protein S4, Y isoform 2	RPS4X;RPS4Y2	>sp|P62701|RS4X_HUMAN 40S ribosomal protein S4, X isoform OS=Homo sapiens GN=RPS4X PE=1 SV=2;>sp|Q8TD47|RS4Y2_HUMAN 40S ribosomal protein S4, Y isoform 2 OS=Homo sapiens GN=RPS4Y2 PE=2 SV=3	6	22	22	22	14	19	14	19	14	19	63.1	63.1	63.1	29.597	263	263;263;262;263;122;273	6.55					1	32	42				24	51	2.9801e-125	1.031	1.0876	19.366	75	0.60592	0.87248	-0.196806	8.3795	24	1.1004	1.1625	-0.217231
P49748;P49748-3;P49748-2;G3V1M7;J3QRJ8;J3KSR4;K7EQP4;J3QKU9;K7EJW8;K7EMF8;J3KS89	P49748;P49748-3;P49748-2	22;22;21;10;5;4;4;2;2;1;1	22;22;21;10;5;4;4;2;2;1;1	22;22;21;10;5;4;4;2;2;1;1	Very long-chain specific acyl-CoA dehydrogenase, mitochondrial	ACADVL	>sp|P49748|ACADV_HUMAN Very long-chain specific acyl-CoA dehydrogenase, mitochondrial OS=Homo sapiens GN=ACADVL PE=1 SV=1;>sp|P49748-3|ACADV_HUMAN Isoform 3 of Very long-chain specific acyl-CoA dehydrogenase, mitochondrial OS=Homo sapiens GN=ACADVL;>sp|P49	11	22	22	22	4	21	4	21	4	21	43.4	43.4	43.4	70.389	655	655;678;633;282;194;204;225;155;158;45;76	4.52				25	24	1					7	43	3.9614e-141	1.518	1.6982	38.348	48	0.48779	0.66101	-0.597256	16.39	6	1.5317	1.7143	-0.77762
M0QZM1	M0QZM1	21	1	1		HNRNPM	>tr|M0QZM1|M0QZM1_HUMAN Heterogeneous nuclear ribonucleoprotein M (Fragment) OS=Homo sapiens GN=HNRNPM PE=4 SV=1	1	21	1	1	18	16	1	0	1	0	65.5	3.7	3.7	39.933	383	383	4.5				1	1						2		2.0432e-115	0.57752	0.78416	0.87376	2	0.57752	0.78416	-0.35078	0.87376	2	NaN	NaN	#VALUE!
P16403	P16403	21	6	6	Histone H1.2	HIST1H1C	>sp|P16403|H12_HUMAN Histone H1.2 OS=Homo sapiens GN=HIST1H1C PE=1 SV=2	1	21	6	6	21	9	6	2	6	2	55.4	20.2	20.2	21.364	213	213	6.31					2	7	7				12	4	7.54e-100	1.1611	1.6433	66.963	16	1.1778	1.6908	0.757706	29.197	12	0.40926	0.44743	1.16027
O75923-15;O75923-3;O75923-9;O75923;O75923-14;O75923-6;O75923-12;O75923-5;O75923-11;O75923-4;O75923-10;O75923-2;O75923-8;O75923-7;O75923-13	O75923-15;O75923-3;O75923-9;O75923;O75923-14;O75923-6;O75923-12;O75923-5;O75923-11;O75923-4;O75923-10;O75923-2;O75923-8;O75923-7;O75923-13	21;21;21;21;21;21;21;21;21;21;21;21;21;21;21	19;19;19;19;19;19;19;19;19;19;19;19;19;19;19	19;19;19;19;19;19;19;19;19;19;19;19;19;19;19	Dysferlin	DYSF	>sp|O75923-15|DYSF_HUMAN Isoform 15 of Dysferlin OS=Homo sapiens GN=DYSF;>sp|O75923-3|DYSF_HUMAN Isoform 3 of Dysferlin OS=Homo sapiens GN=DYSF;>sp|O75923-9|DYSF_HUMAN Isoform 9 of Dysferlin OS=Homo sapiens GN=DYSF;>sp|O75923|DYSF_HUMAN Dysferlin OS=Homo s	15	21	19	19	0	21	0	19	0	19	15.9	14.8	14.8	222.31	1954	1954;2066;2067;2080;2081;2087;2088;2097;2098;2101;2102;2111;2112;2118;2119	2.09		21	2									23	5.3531e-101	0.3879	0.5232	22.088	21	NaN	NaN	#VALUE!	NaN	0	0.3879	0.5232	0.934566
P10412;P22492	P10412	21;4	21;4	5;0	Histone H1.4	HIST1H1E	>sp|P10412|H14_HUMAN Histone H1.4 OS=Homo sapiens GN=HIST1H1E PE=1 SV=2	2	21	21	5	21	8	21	8	5	1	53.9	53.9	19.2	21.865	219	219;207	6.4				2	9	39	34	8			63	29	6.4802e-104	1.1287	1.6461	60.671	91	1.2222	1.7351	0.795019	23.036	63	0.52235	0.55055	0.861055
Q9BUJ2-2;Q9BUJ2;Q9BUJ2-4;B7Z4B8;Q9BUJ2-3;M0R3F1;M0QYZ0;M0QZV6;M0R0K8;M0R203;M0QYI8;Q9BUJ2-5;M0QYM5;M0R247	Q9BUJ2-2;Q9BUJ2;Q9BUJ2-4;B7Z4B8;Q9BUJ2-3;M0R3F1;M0QYZ0	21;21;20;20;18;16;11;6;6;5;5;3;2;1	21;21;20;20;18;16;11;6;6;5;5;3;2;1	21;21;20;20;18;16;11;6;6;5;5;3;2;1	Heterogeneous nuclear ribonucleoprotein U-like protein 1	HNRNPUL1	>sp|Q9BUJ2-2|HNRL1_HUMAN Isoform 2 of Heterogeneous nuclear ribonucleoprotein U-like protein 1 OS=Homo sapiens GN=HNRNPUL1;>sp|Q9BUJ2|HNRL1_HUMAN Heterogeneous nuclear ribonucleoprotein U-like protein 1 OS=Homo sapiens GN=HNRNPUL1 PE=1 SV=2;>sp|Q9BUJ2-4|HN	14	21	21	21	14	10	14	10	14	10	33.7	33.7	33.7	90.291	804	804;856;756;767;752;641;371;118;158;81;172;390;90;105	3.81			14	28	5						28	19	9.5511e-77	0.81838	1.1367	37.778	47	0.97993	1.3117	0.391438	19.9	28	0.53196	0.63219	0.66157
Q9UIQ6;Q9UIQ6-3;Q9UIQ6-2	Q9UIQ6;Q9UIQ6-3;Q9UIQ6-2	21;20;20	21;20;20	21;20;20	Leucyl-cystinyl aminopeptidase;Leucyl-cystinyl aminopeptidase, pregnancy serum form	LNPEP	>sp|Q9UIQ6|LCAP_HUMAN Leucyl-cystinyl aminopeptidase OS=Homo sapiens GN=LNPEP PE=1 SV=3;>sp|Q9UIQ6-3|LCAP_HUMAN Isoform 3 of Leucyl-cystinyl aminopeptidase OS=Homo sapiens GN=LNPEP;>sp|Q9UIQ6-2|LCAP_HUMAN Isoform 2 of Leucyl-cystinyl aminopeptidase OS=Homo	3	21	21	21	2	19	2	19	2	19	28.3	28.3	28.3	117.35	1025	1025;1006;1011	3.03	1	1	24	2	1						2	27	2.2421e-100	0.64027	0.75243	59.566	29	2.3854	3.3752	1.75497	174.88	2	0.63717	0.752	0.411195
P37802	P37802	21	21	20	Transgelin-2	TAGLN2	>sp|P37802|TAGL2_HUMAN Transgelin-2 OS=Homo sapiens GN=TAGLN2 PE=1 SV=3	1	21	21	20	17	17	17	17	16	16	96.5	96.5	89.4	22.391	199	199	7.55						26	71	86	9	11	82	121	3.256e-279	0.75871	0.85755	31.19	199	0.90191	1.2529	0.325271	11.186	82	0.70762	0.77238	0.372617
P09525;Q6P452;B4DDF9	P09525;Q6P452;B4DDF9	21;17;15	21;17;15	21;17;15	Annexin A4;Annexin	ANXA4	>sp|P09525|ANXA4_HUMAN Annexin A4 OS=Homo sapiens GN=ANXA4 PE=1 SV=4;>tr|Q6P452|Q6P452_HUMAN Annexin OS=Homo sapiens GN=ANXA4 PE=2 SV=1;>tr|B4DDF9|B4DDF9_HUMAN Annexin OS=Homo sapiens GN=ANXA4 PE=2 SV=1	3	21	21	21	3	21	3	21	3	21	66.1	66.1	66.1	35.882	319	319;299;237	6.13					11	37	20				11	57	2.0399e-185	0.69229	0.78886	33.227	68	0.80502	1.1424	0.192068	35.531	11	0.68434	0.77344	0.370639
Q96TA1-2;Q96TA1	Q96TA1-2;Q96TA1	21;21	21;21	21;21	Niban-like protein 1	FAM129B	>sp|Q96TA1-2|NIBL1_HUMAN Isoform 2 of Niban-like protein 1 OS=Homo sapiens GN=FAM129B;>sp|Q96TA1|NIBL1_HUMAN Niban-like protein 1 OS=Homo sapiens GN=FAM129B PE=1 SV=3	2	21	21	21	6	19	6	19	6	19	44.6	44.6	44.6	82.682	733	733;746	4.05			15	34	11	2	1				18	45	3.1997e-152	0.74018	0.83478	28.851	63	0.92086	1.1599	0.214	37.384	18	0.66915	0.77716	0.363716
P16949;P16949-2;A2A2D0;B7Z2Z7;Q9H169;G5EA16;Q9H169-2;E5RIR6;E7EVN3	P16949;P16949-2;A2A2D0	21;18;14;1;1;1;1;1;1	21;18;14;1;1;1;1;1;1	16;13;9;0;0;0;0;0;0	Stathmin	STMN1	>sp|P16949|STMN1_HUMAN Stathmin OS=Homo sapiens GN=STMN1 PE=1 SV=3;>sp|P16949-2|STMN1_HUMAN Isoform 2 of Stathmin OS=Homo sapiens GN=STMN1;>tr|A2A2D0|A2A2D0_HUMAN Stathmin (Fragment) OS=Homo sapiens GN=STMN1 PE=2 SV=1	9	21	21	16	20	12	20	12	15	10	79.2	79.2	66.4	17.302	149	149;174;86;167;189;203;216;231;258	7.96						1	26	36	11	7	40	41	2.6838e-81	0.7669	0.95209	19.225	79	0.78815	1.1145	0.156397	10.543	39	0.7467	0.83699	0.256718
O14617;O14617-5;O14617-4;O14617-2;G5E988;O14617-3;E7EMM2;K7ELX8;K7ERW8	O14617;O14617-5;O14617-4;O14617-2;G5E988;O14617-3;E7EMM2	21;21;20;18;18;17;17;3;2	21;21;20;18;18;17;17;3;2	21;21;20;18;18;17;17;3;2	AP-3 complex subunit delta-1	AP3D1	>sp|O14617|AP3D1_HUMAN AP-3 complex subunit delta-1 OS=Homo sapiens GN=AP3D1 PE=1 SV=1;>sp|O14617-5|AP3D1_HUMAN Isoform 5 of AP-3 complex subunit delta-1 OS=Homo sapiens GN=AP3D1;>sp|O14617-4|AP3D1_HUMAN Isoform 4 of AP-3 complex subunit delta-1 OS=Homo sa	9	21	21	21	5	18	5	18	5	18	27.8	27.8	27.8	130.16	1153	1153;1215;1021;1112;1112;984;984;193;155	2.95	3	4	27	6	1						14	27	8.0358e-97	0.75133	0.87875	22.569	41	0.84551	1.0387	0.054779	30.325	14	0.73833	0.85813	0.220732
P27797;K7EJB9;K7EL50;K7EM77	P27797;K7EJB9	21;12;6;3	21;12;6;3	21;12;6;3	Calreticulin	CALR	>sp|P27797|CALR_HUMAN Calreticulin OS=Homo sapiens GN=CALR PE=1 SV=1;>tr|K7EJB9|K7EJB9_HUMAN Calreticulin (Fragment) OS=Homo sapiens GN=CALR PE=3 SV=1	4	21	21	21	3	20	3	20	3	20	69.3	69.3	69.3	48.141	417	417;247;163;61	5.08			1	21	36	15	7				6	74	5.108e-131	0.76263	0.87128	18.491	80	0.69906	1.015	0.0214797	15.571	6	0.76305	0.86992	0.201045
Q8WWM7;Q8WWM7-6;Q8WWM7-8;Q8WWM7-5;Q8WWM7-4;Q8WWM7-9;Q8WWM7-2;H3BUF6;Q8WWM7-3;Q8WWM7-7;H3BSK9;H3BRB0;H3BSQ5;H3BUE3	Q8WWM7;Q8WWM7-6;Q8WWM7-8;Q8WWM7-5;Q8WWM7-4;Q8WWM7-9;Q8WWM7-2;H3BUF6;Q8WWM7-3	21;19;19;19;19;19;19;19;19;4;3;2;1;1	21;19;19;19;19;19;19;19;19;4;3;2;1;1	21;19;19;19;19;19;19;19;19;4;3;2;1;1	Ataxin-2-like protein	ATXN2L	>sp|Q8WWM7|ATX2L_HUMAN Ataxin-2-like protein OS=Homo sapiens GN=ATXN2L PE=1 SV=2;>sp|Q8WWM7-6|ATX2L_HUMAN Isoform 6 of Ataxin-2-like protein OS=Homo sapiens GN=ATXN2L;>sp|Q8WWM7-8|ATX2L_HUMAN Isoform 8 of Ataxin-2-like protein OS=Homo sapiens GN=ATXN2L;>sp	14	21	21	21	19	5	19	5	19	5	20.1	20.1	20.1	113.37	1075	1075;968;1044;1044;1044;1062;1062;1068;1097;399;336;401;91;217	3.49			29	17	2	1					44	5	9.5565e-69	0.70656	0.84568	20.978	46	0.69776	0.83934	-0.252673	21.704	42	0.73141	0.89803	0.155164
P06748;P06748-3;P06748-2;E5RI98;E5RGW4	P06748;P06748-3;P06748-2	21;19;17;3;1	21;19;17;3;1	21;19;17;3;1	Nucleophosmin	NPM1	>sp|P06748|NPM_HUMAN Nucleophosmin OS=Homo sapiens GN=NPM1 PE=1 SV=2;>sp|P06748-3|NPM_HUMAN Isoform 3 of Nucleophosmin OS=Homo sapiens GN=NPM1;>sp|P06748-2|NPM_HUMAN Isoform 2 of Nucleophosmin OS=Homo sapiens GN=NPM1	5	21	21	21	17	14	17	14	17	14	70.4	70.4	70.4	32.575	294	294;259;265;111;59	5.83		7	6	3	21	56	32	6	1	1	56	77	3.0805e-156	0.78537	0.96723	13.512	133	0.7438	1.0657	0.0918014	12.653	56	0.82526	0.90292	0.14733
P31946;Q4VY20;Q4VY19	P31946	21;9;9	11;3;3	2;2;2	14-3-3 protein beta/alpha;14-3-3 protein beta/alpha, N-terminally processed	YWHAB	>sp|P31946|1433B_HUMAN 14-3-3 protein beta/alpha OS=Homo sapiens GN=YWHAB PE=1 SV=3	3	21	11	2	7	19	2	11	1	2	76	51.2	4.5	28.082	246	246;74;100	6.56					1	16	21	1			5	34	5.9144e-279	0.85192	0.94023	28.07	37	0.72988	1.0323	0.0458623	6.1208	5	0.85802	0.92621	0.110589
Q7L576;Q7L576-2;Q7L576-3;H0YL50;H0YLJ5;H0YL39;H0YN93	Q7L576;Q7L576-2	21;13;8;4;3;3;1	21;13;8;4;3;3;1	8;5;4;2;1;1;1	Cytoplasmic FMR1-interacting protein 1	CYFIP1	>sp|Q7L576|CYFP1_HUMAN Cytoplasmic FMR1-interacting protein 1 OS=Homo sapiens GN=CYFIP1 PE=1 SV=1;>sp|Q7L576-2|CYFP1_HUMAN Isoform 2 of Cytoplasmic FMR1-interacting protein 1 OS=Homo sapiens GN=CYFIP1	7	21	21	8	5	21	5	21	1	8	20.8	20.8	7.8	145.18	1253	1253;822;447;176;151;161;185	3.2	1	1	27	11							9	31	2.511e-88	0.79151	0.94372	22.276	40	0.72937	0.94782	-0.077315	20.984	9	0.80675	0.93675	0.094264
P26639;P26639-2;E7ERI3;G3XAN9;D6RCA5;D6R9F8;D6RDJ6;A2RTX5-2;B7ZLP8;A2RTX5;D6RBR8;D6RJ97;D6RHV7;D6RCS6	P26639;P26639-2;E7ERI3;G3XAN9	21;21;17;17;4;4;4;2;2;2;1;1;1;1	21;21;17;17;4;4;4;2;2;2;1;1;1;1	21;21;17;17;4;4;4;2;2;2;1;1;1;1	Threonine--tRNA ligase, cytoplasmic	TARS	>sp|P26639|SYTC_HUMAN Threonine--tRNA ligase, cytoplasmic OS=Homo sapiens GN=TARS PE=1 SV=3;>sp|P26639-2|SYTC_HUMAN Isoform 2 of Threonine--tRNA ligase, cytoplasmic OS=Homo sapiens GN=TARS;>tr|E7ERI3|E7ERI3_HUMAN Threonine--tRNA ligase, cytoplasmic OS=Homo	14	21	21	21	6	20	6	20	6	20	33.6	33.6	33.6	83.434	723	723;756;602;619;118;129;131;707;766;802;50;55;56;66	4.29				28	9	1					15	23	9.3126e-100	0.78987	0.97062	33.959	38	0.74753	0.97332	-0.0390139	22.621	15	0.84217	0.9681	0.046772
O95373;E9PLB2;E9PLJ0	O95373	21;2;1	21;2;1	21;2;1	Importin-7	IPO7	>sp|O95373|IPO7_HUMAN Importin-7 OS=Homo sapiens GN=IPO7 PE=1 SV=1	3	21	21	21	4	20	4	20	4	20	28.4	28.4	28.4	119.52	1038	1038;131;64	3.42		1	28	17	2						6	42	1.1478e-115	0.8225	0.98156	15.044	45	0.81562	1.0601	0.0842004	23.408	4	0.8225	0.97288	0.0396662
P53618;E9PP73;E9PP63;E9PKQ1	P53618	21;10;1;1	21;10;1;1	21;10;1;1	Coatomer subunit beta	COPB1	>sp|P53618|COPB_HUMAN Coatomer subunit beta OS=Homo sapiens GN=COPB1 PE=1 SV=3	4	21	21	21	3	21	3	21	3	21	31.3	31.3	31.3	107.14	953	953;486;132;137	3.76			21	36	6						6	57	3.5861e-126	0.89913	1.0421	13.621	63	0.74446	0.93894	-0.0908951	11.295	6	0.91347	1.0514	-0.0723116
P35998;C9JLS9;B7Z5E2	P35998;C9JLS9	21;13;7	21;13;7	21;13;7	26S protease regulatory subunit 7	PSMC2	>sp|P35998|PRS7_HUMAN 26S protease regulatory subunit 7 OS=Homo sapiens GN=PSMC2 PE=1 SV=3;>tr|C9JLS9|C9JLS9_HUMAN 26S protease regulatory subunit 7 (Fragment) OS=Homo sapiens GN=PSMC2 PE=2 SV=1	3	21	21	21	14	12	14	12	14	12	46.4	46.4	46.4	48.633	433	433;130;296	5.52					27	17	4				30	18	7.695e-83	0.64699	0.87062	18.565	48	0.59494	0.83498	-0.260186	11.457	30	0.96364	1.0816	-0.113167
P07195;A8MW50;C9J7H8;F5H793	P07195	21;10;9;8	20;9;9;8	20;9;9;8	L-lactate dehydrogenase B chain	LDHB	>sp|P07195|LDHB_HUMAN L-lactate dehydrogenase B chain OS=Homo sapiens GN=LDHB PE=1 SV=2	4	21	20	20	12	19	11	18	11	18	57.5	53.9	53.9	36.638	334	334;232;137;102	5.95			1	6	31	53	37	1			27	102	4.2104e-196	1.0315	1.1251	18.821	128	0.62318	0.85807	-0.220833	12.855	27	1.0604	1.1602	-0.214374
P23396;E9PPU1;E9PL09;P23396-2;H0YEU2;F2Z2S8;H0YCJ7;E9PL45;H0YF32;E9PQ96;E9PSF4;E9PJH4;E9PQX2;H0YES8	P23396;E9PPU1;E9PL09;P23396-2;H0YEU2;F2Z2S8;H0YCJ7;E9PL45	21;19;19;19;13;11;11;11;9;8;8;8;3;1	21;19;19;19;13;11;11;11;9;8;8;8;3;1	13;11;11;11;10;3;3;3;3;0;8;0;0;0	40S ribosomal protein S3	RPS3	>sp|P23396|RS3_HUMAN 40S ribosomal protein S3 OS=Homo sapiens GN=RPS3 PE=1 SV=2;>tr|E9PPU1|E9PPU1_HUMAN 40S ribosomal protein S3 OS=Homo sapiens GN=RPS3 PE=2 SV=1;>tr|E9PL09|E9PL09_HUMAN 40S ribosomal protein S3 OS=Homo sapiens GN=RPS3 PE=2 SV=1;>sp|P23396	14	21	21	13	10	17	10	17	8	9	66.3	66.3	42.4	26.688	243	243;158;231;259;171;117;135;164;123;91;103;115;44;33	6	2	1	2	2	11	27	31	2			25	53	1.3791e-116	1.0292	1.0922	28.967	78	0.60435	0.8252	-0.277184	29.176	25	1.0995	1.1837	-0.243303
P06756-3;P06756;P06756-2;H7BZG1	P06756-3;P06756;P06756-2	21;21;20;1	21;21;20;1	21;21;20;1	Integrin alpha-V;Integrin alpha-V heavy chain;Integrin alpha-V light chain	ITGAV	>sp|P06756-3|ITAV_HUMAN Isoform 3 of Integrin alpha-V OS=Homo sapiens GN=ITGAV;>sp|P06756|ITAV_HUMAN Integrin alpha-V OS=Homo sapiens GN=ITGAV PE=1 SV=2;>sp|P06756-2|ITAV_HUMAN Isoform 2 of Integrin alpha-V OS=Homo sapiens GN=ITGAV	4	21	21	21	9	14	9	14	9	14	27	27	27	111.13	1002	1002;1048;1012;136	3.66			23	20	2	1	1				20	27	4.3443e-113	0.75437	0.93565	34.34	47	0.66888	0.8882	-0.171044	33.944	20	1.0318	1.2155	-0.28155
O60271-4;O60271;O60271-2;O60271-5;O60271-3;O60271-9;E9PFH7;Q9UPT6;D6RHI8;H0YBE9;Q9UPT6-2	O60271-4;O60271;O60271-2;O60271-5;O60271-3;O60271-9	21;21;20;19;19;14;3;3;2;2;2	21;21;20;19;19;14;3;3;2;2;2	21;21;20;19;19;14;3;3;2;2;2	C-Jun-amino-terminal kinase-interacting protein 4	SPAG9	>sp|O60271-4|JIP4_HUMAN Isoform 4 of C-Jun-amino-terminal kinase-interacting protein 4 OS=Homo sapiens GN=SPAG9;>sp|O60271|JIP4_HUMAN C-Jun-amino-terminal kinase-interacting protein 4 OS=Homo sapiens GN=SPAG9 PE=1 SV=4;>sp|O60271-2|JIP4_HUMAN Isoform 2 of	11	21	21	21	9	18	9	18	9	18	21	21	21	144.68	1307	1307;1321;1311;931;945;1177;1330;1336;156;174;250	1.93	21	23	11	3							20	38	1.7464e-149	0.88291	1.1534	29.188	57	0.64188	0.80832	-0.307002	19.543	19	0.9665	1.2374	-0.307312
P39019;M0R2L9;M0QXK4;M0QYF7;M0R140	P39019	21;8;8;8;8	21;8;8;8;8	21;8;8;8;8	40S ribosomal protein S19	RPS19	>sp|P39019|RS19_HUMAN 40S ribosomal protein S19 OS=Homo sapiens GN=RPS19 PE=1 SV=2	5	21	21	21	17	16	17	16	17	16	77.9	77.9	77.9	16.06	145	145;71;76;100;102	7.96							22	47	7	6	41	41	3.1414e-69	1.0283	1.1028	23.569	79	0.60507	0.84354	-0.245472	10.226	38	1.1343	1.2788	-0.354791
O75083;O75083-3;D6RD66	O75083;O75083-3	21;13;10	21;13;10	21;13;10	WD repeat-containing protein 1	WDR1	>sp|O75083|WDR1_HUMAN WD repeat-containing protein 1 OS=Homo sapiens GN=WDR1 PE=1 SV=4;>sp|O75083-3|WDR1_HUMAN Isoform 2 of WD repeat-containing protein 1 OS=Homo sapiens GN=WDR1	3	21	21	21	7	19	7	19	7	19	46.9	46.9	46.9	66.193	606	606;466;245	3.73	14	13	20	28	32	12					17	102	3.0269e-118	1.108	1.2792	23.815	119	0.59106	0.82588	-0.275996	22.327	17	1.1326	1.3052	-0.384271
P21399;Q9HBB2;Q5VZA6	P21399;Q9HBB2	21;16;9	21;16;9	21;16;9	Cytoplasmic aconitate hydratase	ACO1;IRP1	>sp|P21399|ACOC_HUMAN Cytoplasmic aconitate hydratase OS=Homo sapiens GN=ACO1 PE=1 SV=3;>tr|Q9HBB2|Q9HBB2_HUMAN Cytoplasmic aconitate hydratase OS=Homo sapiens GN=IRP1 PE=2 SV=1	3	21	21	21	5	17	5	17	5	17	36.3	36.3	36.3	98.398	889	889;790;434	3.83			7	27	1						6	29	3.8677e-142	1.1823	1.3734	37.119	35	0.49483	0.61796	-0.694415	9.6534	6	1.204	1.3889	-0.473943
Q5VYK3;J3KN16;R4GMY1;Q5VYK5;F6XAQ5	Q5VYK3;J3KN16	21;21;10;2;2	21;21;10;2;2	21;21;10;2;2	Proteasome-associated protein ECM29 homolog	ECM29;KIAA0368	>sp|Q5VYK3|ECM29_HUMAN Proteasome-associated protein ECM29 homolog OS=Homo sapiens GN=ECM29 PE=1 SV=2;>tr|J3KN16|J3KN16_HUMAN Proteasome-associated protein ECM29 homolog OS=Homo sapiens GN=KIAA0368 PE=4 SV=1	5	21	21	21	1	20	1	20	1	20	16.6	16.6	16.6	204.29	1845	1845;2017;890;129;142	2.83		6	23	1							1	29	1.7138e-119	1.2133	1.4655	28.252	30	0.5636	0.63965	-0.644645	NaN	1	1.2233	1.469	-0.554834
P04792;F8WE04;C9J3N8	P04792;F8WE04	20;10;2	20;10;2	20;10;2	Heat shock protein beta-1	HSPB1	>sp|P04792|HSPB1_HUMAN Heat shock protein beta-1 OS=Homo sapiens GN=HSPB1 PE=1 SV=2;>tr|F8WE04|F8WE04_HUMAN Heat shock protein beta-1 OS=Homo sapiens GN=HSPB1 PE=2 SV=1	3	20	20	20	16	19	16	19	16	19	87.3	87.3	87.3	22.782	205	205;186;37	6.57				1	10	58	67	11		2	83	66	3.0142e-175	1.3026	1.8422	79.377	149	1.4282	2.041	1.02928	22.377	83	0.39335	0.42478	1.23521
Q15417;F8WA86;B4DFK6;E9PDU6	Q15417;F8WA86;B4DFK6;E9PDU6	20;17;17;13	19;16;17;13	19;16;17;13	Calponin-3	CNN3	>sp|Q15417|CNN3_HUMAN Calponin-3 OS=Homo sapiens GN=CNN3 PE=1 SV=1;>tr|F8WA86|F8WA86_HUMAN Calponin-3 OS=Homo sapiens GN=CNN3 PE=2 SV=1;>tr|B4DFK6|B4DFK6_HUMAN Calponin-3 OS=Homo sapiens GN=CNN3 PE=2 SV=1;>tr|E9PDU6|E9PDU6_HUMAN Calponin-3 (Fragment) OS=Ho	4	20	19	19	12	16	11	15	11	15	74.2	74.2	74.2	36.413	329	329;283;288;185	5.97				1	23	41	20	1			27	59	9.1561e-214	0.61768	0.71068	37.161	84	1.0276	1.4376	0.523662	15.102	26	0.5943	0.65031	0.6208
P07384;E9PL37;E9PRM1;E9PLX0;E9PJJ3;E9PLC9;E9PMC6;E9PJA6;E9PSA6;E9PLQ6;E9PQB3;E9PIA9	P07384	20;4;4;3;3;3;3;3;3;3;3;2	20;4;4;3;3;3;3;3;3;3;3;2	20;4;4;3;3;3;3;3;3;3;3;2	Calpain-1 catalytic subunit	CAPN1	>sp|P07384|CAN1_HUMAN Calpain-1 catalytic subunit OS=Homo sapiens GN=CAPN1 PE=1 SV=1	12	20	20	20	2	19	2	19	2	19	35.2	35.2	35.2	81.889	714	714;191;201;122;136;148;152;162;163;170;191;63	4.04				23	1						3	21	3.6721e-110	0.58481	0.68324	25.48	23	1.0093	1.4071	0.492725	8.6242	3	0.5789	0.65994	0.599593
P04083;Q5T3N1;Q5T3N0	P04083	20;9;6	20;9;6	20;9;6	Annexin A1	ANXA1	>sp|P04083|ANXA1_HUMAN Annexin A1 OS=Homo sapiens GN=ANXA1 PE=1 SV=2	3	20	20	20	8	20	8	20	8	20	56.4	56.4	56.4	38.714	346	346;204;115	6.01					19	35	20				15	59	2.9927e-145	0.66845	0.72416	28.583	73	0.98138	1.3512	0.434241	12.868	15	0.64409	0.71222	0.489605
Q93052;C9JUT4;C9JXK9;C9JIY7;C9JT42;C9J3U9;C9J1K7;C9J5C8;C9J4E3;C9JE51;C9J2R5	Q93052;C9JUT4;C9JXK9	20;18;12;6;6;6;6;6;6;5;5	20;18;12;6;6;6;6;6;6;5;5	20;18;12;6;6;6;6;6;6;5;5	Lipoma-preferred partner	LPP	>sp|Q93052|LPP_HUMAN Lipoma-preferred partner OS=Homo sapiens GN=LPP PE=1 SV=1;>tr|C9JUT4|C9JUT4_HUMAN LIM domain containing preferred translocation partner in lipoma, isoform CRA_e OS=Homo sapiens GN=LPP PE=2 SV=1;>tr|C9JXK9|C9JXK9_HUMAN Lipoma-preferred	11	20	20	20	20	9	20	9	20	9	39.5	39.5	39.5	65.746	612	612;428;252;57;65;66;93;111;151;47;53	4.74			2	31	27	10	3				61	12	1.5658e-115	0.92731	1.2307	24.339	73	0.94128	1.2737	0.349026	13.157	61	0.63181	0.72194	0.470049
Q13263;Q13263-2;M0R0K9;M0R2I3;M0R3C0	Q13263;Q13263-2;M0R0K9	20;19;12;1;1	20;19;12;1;1	20;19;12;1;1	Transcription intermediary factor 1-beta	TRIM28	>sp|Q13263|TIF1B_HUMAN Transcription intermediary factor 1-beta OS=Homo sapiens GN=TRIM28 PE=1 SV=5;>sp|Q13263-2|TIF1B_HUMAN Isoform 2 of Transcription intermediary factor 1-beta OS=Homo sapiens GN=TRIM28;>tr|M0R0K9|M0R0K9_HUMAN Transcription intermediary	5	20	20	20	12	16	12	16	12	16	35.7	35.7	35.7	88.549	835	835;753;460;162;178	3.9			34	36	11	2	2	1			48	38	3.2059e-163	0.84164	1.0141	30.021	83	0.96084	1.2087	0.273456	20.276	47	0.60857	0.74618	0.422404
Q96QK1;I3L4S0;I3L4P4	Q96QK1	20;3;3	20;3;3	20;3;3	Vacuolar protein sorting-associated protein 35	VPS35	>sp|Q96QK1|VPS35_HUMAN Vacuolar protein sorting-associated protein 35 OS=Homo sapiens GN=VPS35 PE=1 SV=2	3	20	20	20	3	19	3	19	3	19	30	30	30	91.706	796	796;41;47	4.31			1	26	7	1	1				6	30	2.3215e-132	0.65866	0.76323	18.97	32	0.85755	1.1791	0.237686	15.996	3	0.65082	0.75862	0.398551
O95782-2;O95782;M0R2D9;E9PPZ3;E9PS94;E9PPY8	O95782-2;O95782	20;20;2;1;1;1	20;20;2;1;1;1	13;13;0;0;0;0	AP-2 complex subunit alpha-1	AP2A1	>sp|O95782-2|AP2A1_HUMAN Isoform B of AP-2 complex subunit alpha-1 OS=Homo sapiens GN=AP2A1;>sp|O95782|AP2A1_HUMAN AP-2 complex subunit alpha-1 OS=Homo sapiens GN=AP2A1 PE=1 SV=3	6	20	20	13	5	18	5	18	2	12	26	26	18.7	105.36	955	955;977;57;60;62;138	3.64			16	25	1						5	37	2.4575e-113	0.75608	0.86816	20.925	41	0.86534	1.1087	0.148869	56.141	5	0.75431	0.86724	0.205497
P31946-2	P31946-2	20	1	1			>sp|P31946-2|1433B_HUMAN Isoform Short of 14-3-3 protein beta/alpha OS=Homo sapiens GN=YWHAB	1	20	1	1	7	18	1	1	1	1	75.8	3.7	3.7	27.85	244	244	6.75						1	3				2	2	7.4942e-275	0.78389	0.97314	14.043	4	0.74176	1.1066	0.146134	3.2157	2	0.81752	0.86967	0.20146
P23528;E9PP50;G3V1A4;E9PK25;E9PQB7;E9PS23;E9PLJ3	P23528;E9PP50;G3V1A4;E9PK25;E9PQB7;E9PS23;E9PLJ3	20;19;18;18;14;12;11	20;19;18;18;14;12;11	16;15;14;14;10;12;10	Cofilin-1	CFL1	>sp|P23528|COF1_HUMAN Cofilin-1 OS=Homo sapiens GN=CFL1 PE=1 SV=3;>tr|E9PP50|E9PP50_HUMAN Cofilin-1 (Fragment) OS=Homo sapiens GN=CFL1 PE=2 SV=1;>tr|G3V1A4|G3V1A4_HUMAN Cofilin 1 (Non-muscle), isoform CRA_a OS=Homo sapiens GN=CFL1 PE=2 SV=1;>tr|E9PK25|E9PK	7	20	20	16	11	17	11	17	10	13	88.6	88.6	65.7	18.502	166	166;160;149;204;122;91;79	7.92						6	30	43	6	14	28	71	5.571e-184	0.83828	0.9474	19.656	95	0.88168	1.2016	0.264957	14.197	28	0.81015	0.90546	0.143277
Q92621;F2Z2D0;E7ET25	Q92621	20;4;2	20;4;2	20;4;2	Nuclear pore complex protein Nup205	NUP205	>sp|Q92621|NU205_HUMAN Nuclear pore complex protein Nup205 OS=Homo sapiens GN=NUP205 PE=1 SV=3	3	20	20	20	4	18	4	18	4	18	13.7	13.7	13.7	227.92	2012	2012;208;249	2.57	2	18	22	1	1						6	38	5.1683e-123	0.78312	0.94865	16.576	44	0.80655	0.99647	-0.00510172	26.398	6	0.77989	0.92948	0.105504
Q13459-2;Q13459;M0R0P8;M0R300;M0QZY4;M0R240;M0R2J3;M0QXP0	Q13459-2;Q13459;M0R0P8;M0R300	20;20;20;19;4;1;1;1	20;20;20;19;4;1;1;1	20;20;20;19;4;1;1;1	Unconventional myosin-IXb	MYO9B	>sp|Q13459-2|MYO9B_HUMAN Isoform Short of Unconventional myosin-IXb OS=Homo sapiens GN=MYO9B;>sp|Q13459|MYO9B_HUMAN Unconventional myosin-IXb OS=Homo sapiens GN=MYO9B PE=1 SV=3;>tr|M0R0P8|M0R0P8_HUMAN Unconventional myosin-IXb OS=Homo sapiens GN=MYO9B PE=4	8	20	20	20	1	19	1	19	1	19	15.2	15.2	15.2	229.14	2022	2022;2157;2157;2072;154;174;175;195	2.26		19	3		1						1	22	1.5295e-78	0.75414	0.96548	12.975	23	0.86479	1.1127	0.154065	NaN	1	0.75163	0.96186	0.0561012
Q92900-2;Q92900	Q92900-2;Q92900	20;20	20;20	20;20	Regulator of nonsense transcripts 1	UPF1	>sp|Q92900-2|RENT1_HUMAN Isoform 2 of Regulator of nonsense transcripts 1 OS=Homo sapiens GN=UPF1;>sp|Q92900|RENT1_HUMAN Regulator of nonsense transcripts 1 OS=Homo sapiens GN=UPF1 PE=1 SV=2	2	20	20	20	5	19	5	19	5	19	24.6	24.6	24.6	123.03	1118	1118;1129	3.21			27	7							9	25	2.6762e-68	0.78636	0.97342	11.496	31	0.83153	1.0555	0.0779266	9.8489	7	0.74945	0.97105	0.0423825
O15460-2;O15460;E7ENX0;E7EPI9;C9JX45;A8MXE0;E7ERI1;C9JCP0;C9JN43;C9JIG4	O15460-2;O15460	20;19;5;5;4;4;4;3;2;2	20;19;5;5;4;4;4;3;2;2	20;19;5;5;4;4;4;3;2;2	Prolyl 4-hydroxylase subunit alpha-2	P4HA2	>sp|O15460-2|P4HA2_HUMAN Isoform IIa of Prolyl 4-hydroxylase subunit alpha-2 OS=Homo sapiens GN=P4HA2;>sp|O15460|P4HA2_HUMAN Prolyl 4-hydroxylase subunit alpha-2 OS=Homo sapiens GN=P4HA2 PE=1 SV=1	10	20	20	20	11	16	11	16	11	16	46.9	46.9	46.9	60.632	533	533;535;204;236;153;167;184;147;101;114	4.9				18	32	10	1				14	47	4.3655e-142	0.87577	1.0052	16.027	60	0.67782	0.92278	-0.115941	6.8555	13	0.92405	1.0271	-0.0385767
P55884;P55884-2;C9JZG1;C9JQN7	P55884;P55884-2	20;20;9;4	20;20;9;4	20;20;9;4	Eukaryotic translation initiation factor 3 subunit B	EIF3B	>sp|P55884|EIF3B_HUMAN Eukaryotic translation initiation factor 3 subunit B OS=Homo sapiens GN=EIF3B PE=1 SV=3;>sp|P55884-2|EIF3B_HUMAN Isoform 2 of Eukaryotic translation initiation factor 3 subunit B OS=Homo sapiens GN=EIF3B	4	20	20	20	4	16	4	16	4	16	41.9	41.9	41.9	92.48	814	814;873;302;153	3.46			22	19							7	34	8.6182e-109	0.871	1.0289	18.584	41	0.62825	0.76892	-0.379095	20.437	7	0.88601	1.0477	-0.0672257
P49736;H0Y8E6;F8WDM3;C9J013;C9JZ21	P49736;H0Y8E6	20;17;2;1;1	20;17;2;1;1	20;17;2;1;1	DNA replication licensing factor MCM2	MCM2	>sp|P49736|MCM2_HUMAN DNA replication licensing factor MCM2 OS=Homo sapiens GN=MCM2 PE=1 SV=4;>tr|H0Y8E6|H0Y8E6_HUMAN DNA replication licensing factor MCM2 (Fragment) OS=Homo sapiens GN=MCM2 PE=3 SV=1	5	20	20	20	3	18	3	18	3	18	31.1	31.1	31.1	101.89	904	904;836;146;103;128	3.32			23	11							6	28	6.2811e-99	0.89566	1.0538	17.088	32	0.82974	1.0689	0.0961269	24.87	6	0.90714	1.0538	-0.0756011
P47897;B4DWJ2;C9J165;B7Z840;C9JSG9;H7C0R3;F2Z2V6	P47897;B4DWJ2	20;19;9;8;7;7;3	20;19;9;8;7;7;3	20;19;9;8;7;7;3	Glutamine--tRNA ligase	QARS	>sp|P47897|SYQ_HUMAN Glutamine--tRNA ligase OS=Homo sapiens GN=QARS PE=1 SV=1;>tr|B4DWJ2|B4DWJ2_HUMAN Bifunctional glutamate/proline--tRNA ligase OS=Homo sapiens GN=QARS PE=2 SV=1	7	20	20	20	4	20	4	20	4	20	33	33	33	87.798	775	775;764;305;282;182;253;100	4.3				26	5	1	1				12	21	3.2595e-101	0.88403	1.0094	12.323	33	0.72148	0.90261	-0.147825	12.836	12	0.90683	1.061	-0.0854247
B4DZI8;P35606;H0YAC7;H0Y938;D6R997;D6RBZ7;D6RCL6;D6RBG7;D6RBT6	B4DZI8;P35606	20;20;3;3;2;1;1;1;1	20;20;3;3;2;1;1;1;1	20;20;3;3;2;1;1;1;1	Coatomer subunit beta	COPB2	>tr|B4DZI8|B4DZI8_HUMAN Coatomer protein complex, subunit beta 2 (Beta prime), isoform CRA_b OS=Homo sapiens GN=COPB2 PE=2 SV=1;>sp|P35606|COPB2_HUMAN Coatomer subunit beta OS=Homo sapiens GN=COPB2 PE=1 SV=2	9	20	20	20	8	17	8	17	8	17	26.8	26.8	26.8	99.045	877	877;906;118;177;153;77;86;89;111	3	8	12	16	23	1	1					18	43	1.2253e-85	0.86336	0.99186	23.475	61	0.69634	0.87505	-0.192563	25.369	18	0.90097	1.0845	-0.11703
Q9Y5B9;G3V5A4;G3V401;G3V2X0	Q9Y5B9	20;1;1;1	20;1;1;1	20;1;1;1	FACT complex subunit SPT16	SUPT16H	>sp|Q9Y5B9|SP16H_HUMAN FACT complex subunit SPT16 OS=Homo sapiens GN=SUPT16H PE=1 SV=1	4	20	20	20	7	18	7	18	7	18	22.1	22.1	22.1	119.91	1047	1047;66;81;83	2.15	20	20	22	4							17	49	1.3709e-107	0.85707	1.0361	25.015	65	0.6437	0.81157	-0.301213	32.481	17	0.87347	1.0928	-0.128029
P49368;P49368-2;B4DUR8;E9PRC8;Q5SZX6;E9PM09;Q5SZX9;Q5SZW8;E9PQ35	P49368;P49368-2;B4DUR8	20;18;17;9;8;7;6;5;4	20;18;17;9;8;7;6;5;4	20;18;17;9;8;7;6;5;4	T-complex protein 1 subunit gamma	CCT3	>sp|P49368|TCPG_HUMAN T-complex protein 1 subunit gamma OS=Homo sapiens GN=CCT3 PE=1 SV=4;>sp|P49368-2|TCPG_HUMAN Isoform 2 of T-complex protein 1 subunit gamma OS=Homo sapiens GN=CCT3;>tr|B4DUR8|B4DUR8_HUMAN T-complex protein 1 subunit gamma OS=Homo sapie	9	20	20	20	7	18	7	18	7	18	42.8	42.8	42.8	60.533	545	545;507;500;234;276;154;161;188;144	4.84				21	33	7	2				14	49	5.1192e-117	1.0017	1.1117	22.139	63	0.58244	0.85429	-0.227202	13.372	14	1.0224	1.1518	-0.20389
P49321;P49321-3;P49321-4;P49321-2;E9PPR5;Q5T624;E9PRH9;H0YF33;H0YDS9;E9PI86;E9PPQ8;E9PNB5	P49321;P49321-3;P49321-4;P49321-2	20;20;17;10;8;7;6;6;5;5;3;2	20;20;17;10;8;7;6;6;5;5;3;2	20;20;17;10;8;7;6;6;5;5;3;2	Nuclear autoantigenic sperm protein	NASP	>sp|P49321|NASP_HUMAN Nuclear autoantigenic sperm protein OS=Homo sapiens GN=NASP PE=1 SV=2;>sp|P49321-3|NASP_HUMAN Isoform 3 of Nuclear autoantigenic sperm protein OS=Homo sapiens GN=NASP;>sp|P49321-4|NASP_HUMAN Isoform 4 of Nuclear autoantigenic sperm pr	12	20	20	20	14	12	14	12	14	12	36	36	36	85.237	788	788;790;724;449;317;422;268;288;175;256;154;143	3.44	1	3	30	14	4	1	1				25	29	2.1011e-182	0.84292	1.0202	31.959	54	0.639	0.75062	-0.413845	23.792	25	0.97465	1.2141	-0.279887
Q6PKG0;Q6PKG0-3;E5RH50;H0YC33;H0YC73;H0YBW1;H0YAN4;H0YBM7;Q659C4-7;Q659C4-6;Q659C4-5;Q659C4-9;Q659C4-2;Q659C4;H0YAX9;H0YBJ5;E5RHK4	Q6PKG0;Q6PKG0-3;E5RH50	20;15;11;4;4;4;2;2;2;2;2;2;2;2;1;1;1	20;15;11;4;4;4;2;2;2;2;2;2;2;2;1;1;1	20;15;11;4;4;4;2;2;2;2;2;2;2;2;1;1;1	La-related protein 1	LARP1	>sp|Q6PKG0|LARP1_HUMAN La-related protein 1 OS=Homo sapiens GN=LARP1 PE=1 SV=2;>sp|Q6PKG0-3|LARP1_HUMAN Isoform 2 of La-related protein 1 OS=Homo sapiens GN=LARP1;>tr|E5RH50|E5RH50_HUMAN La-related protein 1 (Fragment) OS=Homo sapiens GN=LARP1 PE=2 SV=1	17	20	20	20	11	13	11	13	11	13	30.7	30.7	30.7	123.51	1096	1096;1019;611;183;195;281;150;167;201;247;281;787;855;914;61;67;93	3.47		1	28	10	2	1	1				28	15	2.9443e-96	0.6305	0.86739	38.867	43	0.5774	0.72388	-0.466178	25.246	28	1.0099	1.2456	-0.316841
P09874;Q5VX84;Q5VX85	P09874	20;2;2	20;2;2	20;2;2	Poly [ADP-ribose] polymerase 1	PARP1	>sp|P09874|PARP1_HUMAN Poly [ADP-ribose] polymerase 1 OS=Homo sapiens GN=PARP1 PE=1 SV=4	3	20	20	20	5	18	5	18	5	18	25.9	25.9	25.9	113.08	1014	1014;108;155	3.47			24	18	1						8	35	3.7283e-93	1.1164	1.2825	26.727	43	0.58696	0.72446	-0.465022	23.112	8	1.1581	1.3279	-0.409147
A6NKT7;J3KNE0;Q7Z3J3;J3KNY6	A6NKT7;J3KNE0;Q7Z3J3;J3KNY6	20;20;16;16	1;1;1;1	1;1;1;1	RanBP2-like and GRIP domain-containing protein 3;RanBP2-like and GRIP domain-containing protein 4	RGPD3;RGPD4	>sp|A6NKT7|RGPD3_HUMAN RanBP2-like and GRIP domain-containing protein 3 OS=Homo sapiens GN=RGPD3 PE=2 SV=2;>tr|J3KNE0|J3KNE0_HUMAN RanBP2-like and GRIP domain-containing protein 3 OS=Homo sapiens GN=RGPD3 PE=4 SV=1;>sp|Q7Z3J3|RGPD4_HUMAN RanBP2-like and GR	4	20	1	1	5	19	1	1	1	1	12.7	0.7	0.7	197.48	1758	1758;1766;1758;1766	2	1	1	1								1	2	2.7761e-71	0.77983	0.96185	64.635	3	0.77983	0.96185	-0.0561162	NaN	1	1.0375	1.6659	-0.736302
P43490;Q5SYT8;F5H246;C9JG65;C9JF35	P43490;Q5SYT8	20;17;5;3;1	20;17;5;3;1	20;17;5;3;1	Nicotinamide phosphoribosyltransferase	NAMPT;NAMPTL	>sp|P43490|NAMPT_HUMAN Nicotinamide phosphoribosyltransferase OS=Homo sapiens GN=NAMPT PE=1 SV=1;>tr|Q5SYT8|Q5SYT8_HUMAN Protein NAMPTL (Fragment) OS=Homo sapiens GN=NAMPTL PE=2 SV=1	5	20	20	20	4	19	4	19	4	19	52.5	52.5	52.5	55.52	491	491;472;120;88;60	5.05				12	31	13	1				10	47	3.1672e-160	2.0324	2.2629	64.067	53	0.29908	0.41108	-1.28251	8.9972	8	2.0657	2.3371	-1.22472
P49419-2;P49419;F8VS02;P49419-4;P49419-3;H0YHM6;F8VVF2;F8WDY6;F8WD33	P49419-2;P49419;F8VS02;P49419-4;P49419-3	19;17;14;14;10;4;3;1;1	19;17;14;14;10;4;3;1;1	19;17;14;14;10;4;3;1;1	Alpha-aminoadipic semialdehyde dehydrogenase	ALDH7A1	>sp|P49419-2|AL7A1_HUMAN Isoform 2 of Alpha-aminoadipic semialdehyde dehydrogenase OS=Homo sapiens GN=ALDH7A1;>sp|P49419|AL7A1_HUMAN Alpha-aminoadipic semialdehyde dehydrogenase OS=Homo sapiens GN=ALDH7A1 PE=1 SV=5;>tr|F8VS02|F8VS02_HUMAN Alpha-aminoadipic	9	19	19	19	8	14	8	14	8	14	51.3	51.3	51.3	55.366	511	511;539;475;502;347;240;141;77;97	5.21				10	32	17	3				25	37	4.7377e-148	0.49819	0.57061	66.774	62	1.3771	1.8656	0.89964	21.639	25	0.42372	0.47227	1.08232
B7Z2S5;Q16881-4;E7ESI6;Q16881-3;B7Z904;Q16881;E9PIR7;B2R5P6;Q16881-5;E2QRB9;Q16881-2;E9PNQ6;E7EW10;Q16881-6;F5H780;E9PMY9;E9PKD3;E9PIZ5;E9PQI3;E9PLT3;E9PKI4;E9PRI8;E9PJU2	B7Z2S5;Q16881-4;E7ESI6;Q16881-3;B7Z904;Q16881;E9PIR7;B2R5P6;Q16881-5;E2QRB9;Q16881-2;E9PNQ6;E7EW10;Q16881-6;F5H780;E9PMY9	19;19;19;19;19;19;18;18;18;18;18;18;18;18;14;14;9;5;4;4;4;2;1	19;19;19;19;19;19;18;18;18;18;18;18;18;18;14;14;9;5;4;4;4;2;1	19;19;19;19;19;19;18;18;18;18;18;18;18;18;14;14;9;5;4;4;4;2;1	Thioredoxin reductase 1, cytoplasmic	TXNRD1	>tr|B7Z2S5|B7Z2S5_HUMAN Thioredoxin reductase 1, cytoplasmic OS=Homo sapiens GN=TXNRD1 PE=2 SV=1;>sp|Q16881-4|TRXR1_HUMAN Isoform 4 of Thioredoxin reductase 1, cytoplasmic OS=Homo sapiens GN=TXNRD1;>tr|E7ESI6|E7ESI6_HUMAN Thioredoxin reductase 1, cytoplasm	23	19	19	19	5	18	5	18	5	18	51.2	51.2	51.2	60.021	547	547;551;581;598;647;649;482;497;499;541;543;568;612;614;459;461;175;139;53;70;72;44;96	4.88		1	4	21	32	13	5				17	59	7.9513e-194	0.5481	0.64876	36.095	76	0.88075	1.2071	0.271545	22.827	17	0.52399	0.60391	0.727595
E7EVJ5;Q96F07-2;E7EVF4;F5H583;Q96F07;E7EWA4;E7EW33;H7C229;E5RJW3;H0YNP0;E5RFQ0	E7EVJ5;Q96F07-2;E7EVF4;F5H583;Q96F07;E7EWA4;E7EW33;H7C229	19;19;19;18;18;18;16;13;1;1;1	6;6;6;6;6;6;5;5;0;0;0	6;6;6;6;6;6;5;5;0;0;0	Cytoplasmic FMR1-interacting protein 2	CYFIP2	>tr|E7EVJ5|E7EVJ5_HUMAN Cytoplasmic FMR1-interacting protein 2 OS=Homo sapiens GN=CYFIP2 PE=2 SV=1;>sp|Q96F07-2|CYFP2_HUMAN Isoform 2 of Cytoplasmic FMR1-interacting protein 2 OS=Homo sapiens GN=CYFIP2;>tr|E7EVF4|E7EVF4_HUMAN Cytoplasmic FMR1-interacting p	11	19	6	6	4	19	0	6	0	6	20	6.8	6.8	142.58	1227	1227;1253;1253;1178;1278;1278;1057;952;71;77;95	3			6									6	3.0343e-103	0.53535	0.6403	4.7027	6	NaN	NaN	#VALUE!	NaN	0	0.53535	0.6403	0.64318
Q9Y2D5-6;Q9Y2D5;Q9Y2D5-5;Q9Y2D5-4;Q9Y2D5-7;C9JVY5	Q9Y2D5-6;Q9Y2D5;Q9Y2D5-5;Q9Y2D5-4;Q9Y2D5-7;C9JVY5	19;18;18;18;17;15	19;18;18;18;17;15	19;18;18;18;17;15	A-kinase anchor protein 2	AKAP2	>sp|Q9Y2D5-6|AKAP2_HUMAN Isoform 4 of A-kinase anchor protein 2 OS=Homo sapiens GN=AKAP2;>sp|Q9Y2D5|AKAP2_HUMAN A-kinase anchor protein 2 OS=Homo sapiens GN=AKAP2 PE=1 SV=3;>sp|Q9Y2D5-5|AKAP2_HUMAN Isoform 3 of A-kinase anchor protein 2 OS=Homo sapiens GN=	6	19	19	19	12	12	12	12	12	12	24.2	24.2	24.2	120.63	1090	1090;859;948;1103;961;778	3.38			28	12	2						25	17	1.4644e-107	0.88	1.0158	39.405	42	1.1319	1.3699	0.454071	23.056	25	0.50349	0.64274	0.637693
P31150;G5E9U5	P31150	19;8	10;4	10;4	Rab GDP dissociation inhibitor alpha	GDI1	>sp|P31150|GDIA_HUMAN Rab GDP dissociation inhibitor alpha OS=Homo sapiens GN=GDI1 PE=1 SV=2	2	19	10	10	5	18	4	9	4	9	56.8	35.3	35.3	50.582	447	447;147	4.68				10	13	2					5	20	4.6168e-172	0.65116	0.72047	32.006	25	1.0567	1.3891	0.47415	6.4072	5	0.60685	0.6975	0.519735
Q15019;Q15019-2;B5MCX3;H7C2Y0;C9J938;C9JB25;C9J2Q4;C9IZU3;C9JZI2;C9JFT1;F8WB65;C9IY94;C9JT15;C9JSE7;C9JQJ4;H7C310;B5MD47;H7C1T1	Q15019;Q15019-2;B5MCX3;H7C2Y0	19;18;16;10;7;7;7;6;5;4;4;4;3;3;3;3;2;1	19;18;16;10;7;7;7;6;5;4;4;4;3;3;3;3;2;1	19;18;16;10;7;7;7;6;5;4;4;4;3;3;3;3;2;1	Septin-2	2016-09-02	>sp|Q15019|SEPT2_HUMAN Septin-2 OS=Homo sapiens GN=SEPT2 PE=1 SV=1;>sp|Q15019-2|SEPT2_HUMAN Isoform 2 of Septin-2 OS=Homo sapiens GN=SEPT2;>tr|B5MCX3|B5MCX3_HUMAN Septin-2 OS=Homo sapiens GN=SEPT2 PE=2 SV=1;>tr|H7C2Y0|H7C2Y0_HUMAN Septin-2 (Fragment) OS=Ho	18	19	19	19	11	15	11	15	11	15	58.4	58.4	58.4	41.487	361	361;396;321;188;148;173;184;131;105;72;80;121;50;52;147;161;94;29	5.79				1	30	47	13				39	52	4.8194e-205	0.69734	0.80092	34.839	79	0.87807	1.2463	0.317651	15.147	29	0.64645	0.71982	0.474292
Q16555-2;Q16555;E5RFU4	Q16555-2;Q16555	19;19;3	16;16;3	15;15;2	Dihydropyrimidinase-related protein 2	DPYSL2	>sp|Q16555-2|DPYL2_HUMAN Isoform 2 of Dihydropyrimidinase-related protein 2 OS=Homo sapiens GN=DPYSL2;>sp|Q16555|DPYL2_HUMAN Dihydropyrimidinase-related protein 2 OS=Homo sapiens GN=DPYSL2 PE=1 SV=1	3	19	16	15	5	17	4	15	3	14	50.4	44.6	42.2	58.162	536	536;572;170	4.71			1	19	22	5	1				11	37	9.5446e-125	0.74266	0.84605	17.53	48	0.79391	1.0969	0.133432	15.935	11	0.7383	0.82811	0.272106
P41250	P41250	19	19	19	Glycine--tRNA ligase	GARS	>sp|P41250|SYG_HUMAN Glycine--tRNA ligase OS=Homo sapiens GN=GARS PE=1 SV=3	1	19	19	19	5	17	5	17	5	17	36.4	36.4	36.4	83.165	739	739	4.31			1	28	12	1					9	33	1.6741e-143	0.77872	0.90035	26.391	42	0.69535	0.99618	-0.00552165	8.8229	9	0.79955	0.89882	0.153896
P17655;P17655-2	P17655;P17655-2	19;17	19;17	19;17	Calpain-2 catalytic subunit	CAPN2	>sp|P17655|CAN2_HUMAN Calpain-2 catalytic subunit OS=Homo sapiens GN=CAPN2 PE=1 SV=6;>sp|P17655-2|CAN2_HUMAN Isoform 2 of Calpain-2 catalytic subunit OS=Homo sapiens GN=CAPN2	2	19	19	19	3	19	3	19	3	19	34.4	34.4	34.4	79.994	700	700;622	4.39				23	12	1					5	31	1.5322e-119	0.78921	0.93604	15.925	35	0.78921	1.0682	0.0951818	8.4837	5	0.79106	0.9232	0.115285
P60174-1;P60174;P60174-4	P60174-1;P60174;P60174-4	19;19;12	19;19;12	19;19;12	Triosephosphate isomerase	TPI1	>sp|P60174-1|TPIS_HUMAN Isoform 2 of Triosephosphate isomerase OS=Homo sapiens GN=TPI1;>sp|P60174|TPIS_HUMAN Triosephosphate isomerase OS=Homo sapiens GN=TPI1 PE=1 SV=3;>sp|P60174-4|TPIS_HUMAN Isoform 4 of Triosephosphate isomerase OS=Homo sapiens GN=TPI1	3	19	19	19	14	19	14	19	14	19	85.9	85.9	85.9	26.669	249	249;286;167	6.83					1	33	55	3	3	3	28	70	1.4338e-201	0.92235	0.99785	24.425	97	0.6542	0.90805	-0.139156	27.607	28	0.98256	1.0229	-0.0326651
P67809;H0Y449;C9J5V9	P67809;H0Y449	19;15;8	19;15;8	12;12;6	Nuclease-sensitive element-binding protein 1	YBX1	>sp|P67809|YBOX1_HUMAN Nuclease-sensitive element-binding protein 1 OS=Homo sapiens GN=YBX1 PE=1 SV=3;>tr|H0Y449|H0Y449_HUMAN Nuclease-sensitive element-binding protein 1 (Fragment) OS=Homo sapiens GN=YBX1 PE=4 SV=1	3	19	19	12	17	8	17	8	11	3	58.3	58.3	45.7	35.924	324	324;374;216	5.49				10	35	27	12				68	16	2.8343e-198	0.57994	0.81233	21.343	80	0.55125	0.79189	-0.336628	16.486	64	0.90561	1.0612	-0.0856966
Q9NU22;Q5T795;M0QXR3	Q9NU22	19;8;1	19;8;1	19;8;1	Midasin	MDN1	>sp|Q9NU22|MDN1_HUMAN Midasin OS=Homo sapiens GN=MDN1 PE=1 SV=2	3	19	19	19	1	18	1	18	1	18	4.8	4.8	4.8	632.81	5596	5596;1181;62	1.12	23	3									1	25	1.1689e-105	0.89586	1.0861	19.235	26	0.82185	0.65987	-0.599746	NaN	1	0.89799	1.0866	-0.119821
P18124;A8MUD9;C9JIJ5;C9JZ88	P18124;A8MUD9	19;16;5;4	19;16;5;4	19;16;5;4	60S ribosomal protein L7	RPL7	>sp|P18124|RL7_HUMAN 60S ribosomal protein L7 OS=Homo sapiens GN=RPL7 PE=1 SV=1;>tr|A8MUD9|A8MUD9_HUMAN 60S ribosomal protein L7 OS=Homo sapiens GN=RPL7 PE=2 SV=1	4	19	19	19	16	16	16	16	16	16	51.6	51.6	51.6	29.225	248	248;208;99;88	6.21	4	1			2	41	46				39	55	9.016e-93	0.9158	0.9999	16.909	92	0.61987	0.89516	-0.159783	10.175	39	1.0075	1.1042	-0.143002
P17987;E7EQR6;E7ERF2;F5H282;F5GZ03;F5GZI8;F5H136;F5GYL4;F5H676;F5H726;F5H7Y1	P17987;E7EQR6;E7ERF2;F5H282	19;13;12;11;5;4;4;3;3;2;1	19;13;12;11;5;4;4;3;3;2;1	19;13;12;11;5;4;4;3;3;2;1	T-complex protein 1 subunit alpha	TCP1	>sp|P17987|TCPA_HUMAN T-complex protein 1 subunit alpha OS=Homo sapiens GN=TCP1 PE=1 SV=1;>tr|E7EQR6|E7EQR6_HUMAN T-complex protein 1 subunit alpha OS=Homo sapiens GN=TCP1 PE=2 SV=1;>tr|E7ERF2|E7ERF2_HUMAN T-complex protein 1 subunit alpha OS=Homo sapiens	11	19	19	19	6	18	6	18	6	18	50.5	50.5	50.5	60.343	556	556;401;433;332;221;100;136;65;111;91;59	5.05			1	19	28	13	3			1	9	56	3.9586e-123	1.0258	1.145	18.488	65	0.63631	0.87063	-0.199868	26.06	9	1.0386	1.1733	-0.230572
P16401	P16401	19	13	13	Histone H1.5	HIST1H1B	>sp|P16401|H15_HUMAN Histone H1.5 OS=Homo sapiens GN=HIST1H1B PE=1 SV=3	1	19	13	13	19	8	13	8	13	8	49.1	36.3	36.3	22.58	226	226	6.31					9	27	22	3			41	20	3.0436e-99	0.81342	1.1075	23.329	61	0.73545	1.0701	0.0977456	22.182	41	1.1119	1.2006	-0.263756
P61247;D6RAT0;D6RG13;H0Y9Y4;D6R9B6;D6RB09;F5H4F9;E9PFI5;H0Y8L7;D6RAS7;D6RED7;D6RI02;D6RGE0	P61247;D6RAT0;D6RG13;H0Y9Y4;D6R9B6;D6RB09;F5H4F9;E9PFI5;H0Y8L7	19;17;16;15;13;13;12;12;10;7;5;4;3	19;17;16;15;13;13;12;12;10;7;5;4;3	19;17;16;15;13;13;12;12;10;7;5;4;3	40S ribosomal protein S3a	RPS3A	>sp|P61247|RS3A_HUMAN 40S ribosomal protein S3a OS=Homo sapiens GN=RPS3A PE=1 SV=2;>tr|D6RAT0|D6RAT0_HUMAN 40S ribosomal protein S3a OS=Homo sapiens GN=RPS3A PE=2 SV=1;>tr|D6RG13|D6RG13_HUMAN 40S ribosomal protein S3a (Fragment) OS=Homo sapiens GN=RPS3A PE	13	19	19	19	13	16	13	16	13	16	58.3	58.3	58.3	29.945	264	264;227;223;208;145;194;175;205;190;125;101;95;65	6.43					9	31	32	3		1	31	45	9.7035e-103	1.0353	1.1237	30.005	70	0.59675	0.84761	-0.238527	31.096	28	1.1271	1.2279	-0.296193
P62280;M0QZC5;M0R1H6;M0R1H5	P62280;M0QZC5	19;18;7;4	19;18;7;4	19;18;7;4	40S ribosomal protein S11	RPS11	>sp|P62280|RS11_HUMAN 40S ribosomal protein S11 OS=Homo sapiens GN=RPS11 PE=1 SV=3;>tr|M0QZC5|M0QZC5_HUMAN 40S ribosomal protein S11 OS=Homo sapiens GN=RPS11 PE=4 SV=1	4	19	19	19	15	13	15	13	15	13	71.5	71.5	71.5	18.431	158	158;118;88;79	7.4						9	28	26	2	2	35	32	7.2715e-55	0.73038	1.0778	26.277	67	0.57879	0.83021	-0.268452	13.379	35	1.1591	1.2803	-0.356482
Q9NR09	Q9NR09	19	19	19	Baculoviral IAP repeat-containing protein 6	BIRC6	>sp|Q9NR09|BIRC6_HUMAN Baculoviral IAP repeat-containing protein 6 OS=Homo sapiens GN=BIRC6 PE=1 SV=2	1	19	19	19	2	19	2	19	2	19	7.7	7.7	7.7	530.25	4857	4857	1.13	20	3									2	21	3.0113e-92	1.0764	1.3097	37.934	23	0.59124	0.65388	-0.612902	17.226	2	1.0788	1.334	-0.415759
Q06830	Q06830	19	19	15	Peroxiredoxin-1	PRDX1	>sp|Q06830|PRDX1_HUMAN Peroxiredoxin-1 OS=Homo sapiens GN=PRDX1 PE=1 SV=1	1	19	19	15	11	18	11	18	8	14	66.8	66.8	51.8	22.11	199	199	6.97						20	33	15		1	19	50	7.8005e-74	1.3158	1.4243	42.223	69	0.45541	0.64747	-0.627115	5.4814	19	1.4412	1.4994	-0.584385
P02786;G3V0E5;F5H6B1;F8WBE5;H7C3V5	P02786;G3V0E5;F5H6B1	19;17;14;2;2	19;17;14;2;2	19;17;14;2;2	Transferrin receptor protein 1;Transferrin receptor protein 1, serum form	TFRC	>sp|P02786|TFR1_HUMAN Transferrin receptor protein 1 OS=Homo sapiens GN=TFRC PE=1 SV=2;>tr|G3V0E5|G3V0E5_HUMAN Transferrin receptor (P90, CD71), isoform CRA_c OS=Homo sapiens GN=TFRC PE=2 SV=1;>tr|F5H6B1|F5H6B1_HUMAN Transferrin receptor protein 1, serum f	5	19	19	19	6	19	6	19	6	19	30.8	30.8	30.8	84.87	760	760;679;478;81;118	3.76			13	30	2						11	34	5.3959e-97	1.6008	1.8105	54.653	45	0.41059	0.51916	-0.945749	25.611	11	1.674	1.8701	-0.903115
P16402	P16402	18	2	2	Histone H1.3	HIST1H1D	>sp|P16402|H13_HUMAN Histone H1.3 OS=Homo sapiens GN=HIST1H1D PE=1 SV=2	1	18	2	2	18	7	2	0	2	0	43.4	9	9	22.35	221	221	6.5						2	2				4		6.1221e-80	0.76793	1.0295	4.7664	4	0.76793	1.0295	0.0419438	4.7664	4	NaN	NaN	#VALUE!
Q53FA7;Q53FA7-2;H7BZH6	Q53FA7;Q53FA7-2;H7BZH6	18;10;9	18;10;9	18;10;9	Quinone oxidoreductase PIG3	TP53I3	>sp|Q53FA7|QORX_HUMAN Quinone oxidoreductase PIG3 OS=Homo sapiens GN=TP53I3 PE=1 SV=2;>sp|Q53FA7-2|QORX_HUMAN Isoform 2 of Quinone oxidoreductase PIG3 OS=Homo sapiens GN=TP53I3;>tr|H7BZH6|H7BZH6_HUMAN Quinone oxidoreductase PIG3 (Fragment) OS=Homo sapiens	3	18	18	18	9	16	9	16	9	16	59	59	59	35.536	332	332;248;216	6.06				1	14	38	18	1			26	46	4.2271e-115	0.31634	0.36273	107.94	68	1.8897	2.6817	1.42315	27.336	24	0.28819	0.31122	1.68399
Q9UGI8;Q9UGI8-2;F8W7T0;B7Z6L5;H7BYK1;F8WDI4	Q9UGI8;Q9UGI8-2	18;17;7;2;2;1	18;17;7;2;2;1	18;17;7;2;2;1	Testin	TES	>sp|Q9UGI8|TES_HUMAN Testin OS=Homo sapiens GN=TES PE=1 SV=1;>sp|Q9UGI8-2|TES_HUMAN Isoform 2 of Testin OS=Homo sapiens GN=TES	6	18	18	18	12	10	12	10	12	10	37.3	37.3	37.3	47.996	421	421;412;79;179;192;44	5.39				2	19	14	1				24	12	1.8751e-70	1.3101	1.7891	72.793	36	1.3324	1.8687	0.902035	48.395	24	0.42646	0.4781	1.06462
P35237;C9JTJ8;C9JVA8;H7BXK7;P50452-2;P50452	P35237	18;1;1;1;1;1	18;1;1;1;1;1	18;1;1;1;1;1	Serpin B6	SERPINB6	>sp|P35237|SPB6_HUMAN Serpin B6 OS=Homo sapiens GN=SERPINB6 PE=1 SV=3	6	18	18	18	0	18	0	18	0	18	59.3	59.3	59.3	42.621	376	376;124;164;189;242;374	6.28					16	20	11	4		3		54	6.3703e-261	0.48436	0.55587	28.527	54	NaN	NaN	#VALUE!	NaN	0	0.48436	0.55587	0.847181
Q07960;H0YE29;E9PNR6	Q07960;H0YE29	18;12;7	18;12;7	18;12;7	Rho GTPase-activating protein 1	ARHGAP1	>sp|Q07960|RHG01_HUMAN Rho GTPase-activating protein 1 OS=Homo sapiens GN=ARHGAP1 PE=1 SV=1;>tr|H0YE29|H0YE29_HUMAN Rho GTPase-activating protein 1 (Fragment) OS=Homo sapiens GN=ARHGAP1 PE=4 SV=1	3	18	18	18	3	18	3	18	3	18	72.2	72.2	72.2	50.435	439	439;334;192	5.15				15	32	17	4				7	61	6.8297e-158	0.54177	0.59599	22.347	60	1.0483	1.4132	0.498966	2.8721	3	0.53344	0.58783	0.766529
Q9Y4F1;Q9Y4F1-2;C9JME2;M0QYB0;M0R262;M0QXT1;H0Y783;Q9Y4F1-3	Q9Y4F1;Q9Y4F1-2;C9JME2	18;18;18;6;4;3;2;1	18;18;18;6;4;3;2;1	18;18;18;6;4;3;2;1	FERM, RhoGEF and pleckstrin domain-containing protein 1	FARP1	>sp|Q9Y4F1|FARP1_HUMAN FERM, RhoGEF and pleckstrin domain-containing protein 1 OS=Homo sapiens GN=FARP1 PE=1 SV=1;>sp|Q9Y4F1-2|FARP1_HUMAN Isoform 2 of FERM, RhoGEF and pleckstrin domain-containing protein 1 OS=Homo sapiens GN=FARP1;>tr|C9JME2|C9JME2_HUMAN	8	18	18	18	2	16	2	16	2	16	24.4	24.4	24.4	118.63	1045	1045;1076;1076;203;171;248;215;129	3.42		2	21	10	2	1					6	30	5.6685e-58	0.51013	0.63994	35.658	36	1.0419	1.4317	0.517729	13.339	6	0.49965	0.61241	0.70743
P51572;P51572-2;C9JSP1;C9JQ75;C9J0M4;C9JMD7;C9JM14	P51572;P51572-2;C9JSP1;C9JQ75;C9J0M4;C9JMD7	18;18;10;10;10;9;2	18;18;10;10;10;9;2	18;18;10;10;10;9;2	B-cell receptor-associated protein 31	BCAP31	>sp|P51572|BAP31_HUMAN B-cell receptor-associated protein 31 OS=Homo sapiens GN=BCAP31 PE=1 SV=3;>sp|P51572-2|BAP31_HUMAN Isoform 2 of B-cell receptor-associated protein 31 OS=Homo sapiens GN=BCAP31;>tr|C9JSP1|C9JSP1_HUMAN B-cell receptor-associated protei	7	18	18	18	9	16	9	16	9	16	50	50	50	27.991	246	246;313;182;187;188;178;138	6.75						15	35	2			15	37	1.1358e-79	0.66403	0.70617	35.831	52	0.94953	1.3632	0.446997	9.1969	15	0.627	0.6774	0.56192
Q12906-5;Q12906-4;Q12906-2;Q12906-6;Q12906-3;Q12906;Q12906-7;K7EKJ9;K7ER69;K7EQR9;K7ERM6;K7ENK6;K7EM82;K7EJ09;K7EKY0;Q96SI9-2;Q96SI9	Q12906-5;Q12906-4;Q12906-2;Q12906-6;Q12906-3;Q12906;Q12906-7	18;18;18;18;18;18;18;6;4;4;2;2;2;2;2;2;2	18;18;18;18;18;18;18;6;4;4;2;2;2;2;2;2;2	18;18;18;18;18;18;18;6;4;4;2;2;2;2;2;2;2	Interleukin enhancer-binding factor 3	ILF3	>sp|Q12906-5|ILF3_HUMAN Isoform 5 of Interleukin enhancer-binding factor 3 OS=Homo sapiens GN=ILF3;>sp|Q12906-4|ILF3_HUMAN Isoform 4 of Interleukin enhancer-binding factor 3 OS=Homo sapiens GN=ILF3;>sp|Q12906-2|ILF3_HUMAN Isoform 2 of Interleukin enhancer-	17	18	18	18	9	17	9	17	9	17	34.1	34.1	34.1	74.606	690	690;698;702;706;764;894;898;254;161;180;78;79;99;122;158;658;672	3.89			14	32	8						17	37	2.1882e-67	0.78363	0.97883	23.534	54	0.86383	1.1166	0.159112	13.016	17	0.69314	0.80846	0.306752
P14314-2;P14314;K7ELL7;K7EPW7;K7EKX1;K7EJ70	P14314-2;P14314;K7ELL7	18;18;18;8;2;2	18;18;18;8;2;2	18;18;18;8;2;2	Glucosidase 2 subunit beta	PRKCSH	>sp|P14314-2|GLU2B_HUMAN Isoform 2 of Glucosidase 2 subunit beta OS=Homo sapiens GN=PRKCSH;>sp|P14314|GLU2B_HUMAN Glucosidase 2 subunit beta OS=Homo sapiens GN=PRKCSH PE=1 SV=2;>tr|K7ELL7|K7ELL7_HUMAN Glucosidase 2 subunit beta OS=Homo sapiens GN=PRKCSH PE	6	18	18	18	12	17	12	17	12	17	31	31	31	59.177	525	525;528;535;168;140;144	4.02			15	35	12	2					24	40	1.5607e-98	0.76446	0.94574	16.36	62	0.82376	1.0651	0.0909889	9.574	24	0.72239	0.84591	0.241424
P07686;Q5URX0;H0YA83;H0Y9B6;D6REQ8	P07686;Q5URX0;H0YA83;H0Y9B6	18;16;9;9;1	18;16;9;9;1	18;16;9;9;1	Beta-hexosaminidase subunit beta;Beta-hexosaminidase subunit beta chain B;Beta-hexosaminidase subunit beta chain A	HEXB	>sp|P07686|HEXB_HUMAN Beta-hexosaminidase subunit beta OS=Homo sapiens GN=HEXB PE=1 SV=3;>tr|Q5URX0|Q5URX0_HUMAN Beta-hexosaminidase subunit beta OS=Homo sapiens GN=HEXB PE=2 SV=1;>tr|H0YA83|H0YA83_HUMAN Beta-hexosaminidase subunit beta (Fragment) OS=Homo	5	18	18	18	2	17	2	17	2	17	40.3	40.3	40.3	63.111	556	556;331;170;202;35	6.64						14	17	2			2	31	1.1196e-84	0.78804	0.85954	28.053	31	0.90822	1.2116	0.276913	NaN	1	0.78489	0.85428	0.227219
Q8N3C0;Q8N3C0-4;Q8N3C0-3;E5RFZ0	Q8N3C0;Q8N3C0-4	18;9;1;1	18;9;1;1	18;9;1;1	Activating signal cointegrator 1 complex subunit 3	ASCC3	>sp|Q8N3C0|ASCC3_HUMAN Activating signal cointegrator 1 complex subunit 3 OS=Homo sapiens GN=ASCC3 PE=1 SV=3;>sp|Q8N3C0-4|ASCC3_HUMAN Isoform 3 of Activating signal cointegrator 1 complex subunit 3 OS=Homo sapiens GN=ASCC3	4	18	18	18	1	18	1	18	1	18	11.5	11.5	11.5	251.46	2202	2202;731;111;176	1.54	19	16	2								1	36	2.6358e-81	0.68449	0.87464	72.964	37	0.86034	1.0528	0.0742314	NaN	1	0.68342	0.87169	0.198113
Q92499	Q92499	18	18	18	ATP-dependent RNA helicase DDX1	DDX1	>sp|Q92499|DDX1_HUMAN ATP-dependent RNA helicase DDX1 OS=Homo sapiens GN=DDX1 PE=1 SV=2	1	18	18	18	3	17	3	17	3	17	33	33	33	82.431	740	740	4.16				27	5						6	26	1.0569e-114	0.78077	0.91441	17.154	31	0.78435	0.99865	-0.00194895	10.06	6	0.7753	0.90027	0.15157
P26599;P26599-2;P26599-3;A6NLN1;K7EKJ7;K7ELW5;K7EK45	P26599;P26599-2;P26599-3;A6NLN1	18;18;18;10;8;7;4	18;18;18;10;8;7;4	10;10;10;9;2;2;2	Polypyrimidine tract-binding protein 1	PTBP1	>sp|P26599|PTBP1_HUMAN Polypyrimidine tract-binding protein 1 OS=Homo sapiens GN=PTBP1 PE=1 SV=1;>sp|P26599-2|PTBP1_HUMAN Isoform 2 of Polypyrimidine tract-binding protein 1 OS=Homo sapiens GN=PTBP1;>sp|P26599-3|PTBP1_HUMAN Isoform 3 of Polypyrimidine trac	7	18	18	10	9	17	9	17	7	9	51	51	28.4	57.221	531	531;550;557;197;236;233;256	5.11			1	22	40	22	6				21	70	6.7976e-183	0.79809	0.93619	14.032	91	0.76416	1.0455	0.0641931	14.961	21	0.81389	0.90495	0.14409
P35658-2;P35658-4;P35658;P35658-3;P35658-5;H0Y837;H0YF36;B7ZAV2;E9PKD2	P35658-2;P35658-4;P35658;P35658-3;P35658-5	18;18;18;18;18;6;4;4;3	18;18;18;18;18;6;4;4;3	18;18;18;18;18;6;4;4;3	Nuclear pore complex protein Nup214	NUP214	>sp|P35658-2|NU214_HUMAN Isoform 2 of Nuclear pore complex protein Nup214 OS=Homo sapiens GN=NUP214;>sp|P35658-4|NU214_HUMAN Isoform 4 of Nuclear pore complex protein Nup214 OS=Homo sapiens GN=NUP214;>sp|P35658|NU214_HUMAN Nuclear pore complex protein Nup2	9	18	18	18	9	15	9	15	9	15	15.6	15.6	15.6	212.57	2079	2079;2080;2090;2091;2093;967;140;916;495	2.17	9	24	11	3							23	24	1.0967e-111	0.8178	0.97355	34.951	47	0.83349	0.98682	-0.0191411	26.992	23	0.79508	0.95961	0.0594799
Q99613;H3BRV0;B5ME19;H3BPE3;H3BPE4;H3BTY8	Q99613;H3BRV0;B5ME19	18;17;17;2;2;1	18;17;17;2;2;1	18;17;17;2;2;1	Eukaryotic translation initiation factor 3 subunit C	EIF3C;EIF3CL	>sp|Q99613|EIF3C_HUMAN Eukaryotic translation initiation factor 3 subunit C OS=Homo sapiens GN=EIF3C PE=1 SV=1;>tr|H3BRV0|H3BRV0_HUMAN Eukaryotic translation initiation factor 3 subunit C OS=Homo sapiens GN=EIF3C PE=2 SV=1;>sp|B5ME19|EIFCL_HUMAN Eukaryotic	6	18	18	18	8	17	8	17	8	17	26.4	26.4	26.4	105.34	913	913;903;914;133;148;80	3.63			28	30	5						17	46	2.5325e-140	0.79931	0.98515	16.393	63	0.78216	1.0141	0.0201999	13.668	17	0.80455	0.97562	0.0356088
P35232;C9JW96;C9JZ20;E7ESE2;E9PCW0;B4DY47;D6RBK0	P35232;C9JW96;C9JZ20;E7ESE2;E9PCW0	18;15;13;13;13;7;6	18;15;13;13;13;7;6	18;15;13;13;13;7;6	Prohibitin	PHB	>sp|P35232|PHB_HUMAN Prohibitin OS=Homo sapiens GN=PHB PE=1 SV=1;>tr|C9JW96|C9JW96_HUMAN Prohibitin (Fragment) OS=Homo sapiens GN=PHB PE=2 SV=2;>tr|C9JZ20|C9JZ20_HUMAN Prohibitin (Fragment) OS=Homo sapiens GN=PHB PE=2 SV=1;>tr|E7ESE2|E7ESE2_HUMAN Prohibiti	7	18	18	18	8	16	8	16	8	16	83.1	83.1	83.1	29.804	272	272;246;201;204;214;155;124	6.6						18	27				10	35	7.116e-139	0.88226	0.99876	11.274	41	0.74045	1.0811	0.1125	7.5094	9	0.89366	0.99154	0.0122571
P00367;B4DGN5;B3KV55;P49448	P00367;B4DGN5;B3KV55;P49448	18;15;13;10	18;15;13;10	18;15;13;10	Glutamate dehydrogenase 1, mitochondrial;Glutamate dehydrogenase;Glutamate dehydrogenase 2, mitochondrial	GLUD1;GLUD2	>sp|P00367|DHE3_HUMAN Glutamate dehydrogenase 1, mitochondrial OS=Homo sapiens GN=GLUD1 PE=1 SV=2;>tr|B4DGN5|B4DGN5_HUMAN Glutamate dehydrogenase OS=Homo sapiens GN=GLUD1 PE=2 SV=1;>tr|B3KV55|B3KV55_HUMAN Glutamate dehydrogenase OS=Homo sapiens GN=GLUD1 PE	4	18	18	18	6	17	6	17	6	17	47.7	47.7	47.7	61.397	558	558;425;391;558	5.11				8	24	11	1				13	31	1.0379e-54	0.80151	0.97408	32.385	44	0.69764	0.96911	-0.0452677	45.067	13	0.86795	0.99606	0.00569545
P26641;B4DTG2	P26641;B4DTG2	18;17	18;17	18;17	Elongation factor 1-gamma	EEF1G	>sp|P26641|EF1G_HUMAN Elongation factor 1-gamma OS=Homo sapiens GN=EEF1G PE=1 SV=3;>tr|B4DTG2|B4DTG2_HUMAN Elongation factor 1-gamma OS=Homo sapiens GN=EEF1G PE=2 SV=1	2	18	18	18	6	18	6	18	6	18	54.2	54.2	54.2	50.118	437	437;487	5.36			1	10	39	26	8				20	64	5.3029e-134	0.8718	0.99581	17.967	84	0.69532	0.98243	-0.0255735	14.574	20	0.90767	1.0032	-0.00460925
Q15029-2;K7EJ81;Q15029;K7EP67;K7EJ74	Q15029-2;K7EJ81;Q15029	18;18;18;7;4	17;17;17;6;3	17;17;17;6;3	116 kDa U5 small nuclear ribonucleoprotein component	EFTUD2	>sp|Q15029-2|U5S1_HUMAN Isoform 2 of 116 kDa U5 small nuclear ribonucleoprotein component OS=Homo sapiens GN=EFTUD2;>tr|K7EJ81|K7EJ81_HUMAN 116 kDa U5 small nuclear ribonucleoprotein component OS=Homo sapiens GN=EFTUD2 PE=4 SV=1;>sp|Q15029|U5S1_HUMAN 116 k	5	18	17	17	1	18	1	17	1	17	29	28	28	105.38	937	937;962;972;223;134	3.41			17	12							2	27	4.0776e-133	0.90509	1.0616	9.4676	29	0.74324	0.93131	-0.102667	3.6113	2	0.9053	1.0653	-0.0912598
Q96AE4-2;Q96AE4;E9PEB5;B4DT31;C9JSZ1	Q96AE4-2;Q96AE4;E9PEB5;B4DT31	18;17;17;17;8	17;16;16;16;8	16;15;15;15;8	Far upstream element-binding protein 1	FUBP1	>sp|Q96AE4-2|FUBP1_HUMAN Isoform 2 of Far upstream element-binding protein 1 OS=Homo sapiens GN=FUBP1;>sp|Q96AE4|FUBP1_HUMAN Far upstream element-binding protein 1 OS=Homo sapiens GN=FUBP1 PE=1 SV=3;>tr|E9PEB5|E9PEB5_HUMAN Far upstream element-binding prot	5	18	17	16	17	9	16	8	15	8	33.7	32.5	31.1	68.604	653	653;644;655;665;232	4.49				22	18	1					32	9	1.8062e-69	0.68972	0.91627	11.06	41	0.66192	0.91098	-0.134509	9.0599	32	0.88891	1.0692	-0.0965317
P50914;E7EPB3	P50914	18;7	18;7	18;7	60S ribosomal protein L14	RPL14	>sp|P50914|RL14_HUMAN 60S ribosomal protein L14 OS=Homo sapiens GN=RPL14 PE=1 SV=4	2	18	18	18	17	7	17	7	17	7	52.6	52.6	52.6	23.432	215	215;124	6.78						15	33	1		1	29	21	2.5225e-70	0.64577	0.96463	15.903	49	0.6092	0.8755	-0.191821	10.982	29	1.0271	1.1056	-0.14483
Q96AG4;I3L223	Q96AG4	18;2	18;2	18;2	Leucine-rich repeat-containing protein 59	LRRC59	>sp|Q96AG4|LRC59_HUMAN Leucine-rich repeat-containing protein 59 OS=Homo sapiens GN=LRRC59 PE=1 SV=1	2	18	18	18	16	12	16	12	16	12	46.6	46.6	46.6	34.93	307	307;62	6.3					7	37	29				46	27	2.4927e-140	0.62914	0.88703	29.352	72	0.5891	0.83467	-0.260722	10.911	46	1.0869	1.1907	-0.25181
P50552;K7EM16;K7ENR7;K7ENL7;K7EQD0;K7EIG8	P50552	18;8;3;3;1;1	18;8;3;3;1;1	18;8;3;3;1;1	Vasodilator-stimulated phosphoprotein	VASP	>sp|P50552|VASP_HUMAN Vasodilator-stimulated phosphoprotein OS=Homo sapiens GN=VASP PE=1 SV=3	6	18	18	18	17	9	17	9	17	9	48.9	48.9	48.9	39.829	380	380;183;59;103;36;46	5.47				6	34	27	7				53	21	4.0387e-89	0.65665	0.90645	23.307	73	0.61631	0.85841	-0.220261	20.659	52	1.0218	1.1958	-0.257976
P17844;J3KTA4;B4DLW8;J3QRQ7;J3QR02;J3KRX8;J3QRN5	P17844;J3KTA4;B4DLW8	18;18;17;7;6;6;1	14;14;13;7;6;6;1	14;14;13;7;6;6;1	Probable ATP-dependent RNA helicase DDX5	DDX5	>sp|P17844|DDX5_HUMAN Probable ATP-dependent RNA helicase DDX5 OS=Homo sapiens GN=DDX5 PE=1 SV=1;>tr|J3KTA4|J3KTA4_HUMAN Probable ATP-dependent RNA helicase DDX5 OS=Homo sapiens GN=DDX5 PE=3 SV=1;>tr|B4DLW8|B4DLW8_HUMAN Probable ATP-dependent RNA helicase	7	18	14	14	11	11	10	7	10	7	30	23.1	23.1	69.147	614	614;614;535;212;99;120;65	4.68				12	17	2					15	16	3.3917e-67	0.87223	0.96974	26.099	31	0.55886	0.78969	-0.340642	7.7002	15	1.0548	1.2048	-0.268794
Q15459;E9PAW1;H7C1L2;F8WB66;F8WC79	Q15459;E9PAW1	18;15;4;2;1	18;15;4;2;1	18;15;4;2;1	Splicing factor 3A subunit 1	SF3A1	>sp|Q15459|SF3A1_HUMAN Splicing factor 3A subunit 1 OS=Homo sapiens GN=SF3A1 PE=1 SV=1;>tr|E9PAW1|E9PAW1_HUMAN Splicing factor 3A subunit 1 OS=Homo sapiens GN=SF3A1 PE=2 SV=1	5	18	18	18	14	5	14	5	14	5	29	29	29	88.885	793	793;728;259;63;38	3.76			18	19	3	1	1				35	7	2.2414e-73	0.64987	0.83772	21.177	41	0.63451	0.80786	-0.307823	15.966	35	1.0215	1.2122	-0.277628
O43795-2;E9PDF6;O43795;E7EQD9;H7C2Y7;E7EPB4;C9JYW1;C9JUP5;C9K0I9;Q9UBC5;G3V342;F5GWY8	O43795-2;E9PDF6;O43795;E7EQD9	18;18;18;9;5;5;4;3;2;2;1;1	18;18;18;9;5;5;4;3;2;2;1;1	18;18;18;9;5;5;4;3;2;2;1;1	Unconventional myosin-Ib	MYO1B	>sp|O43795-2|MYO1B_HUMAN Isoform 2 of Unconventional myosin-Ib OS=Homo sapiens GN=MYO1B;>tr|E9PDF6|E9PDF6_HUMAN Unconventional myosin-Ib OS=Homo sapiens GN=MYO1B PE=2 SV=1;>sp|O43795|MYO1B_HUMAN Unconventional myosin-Ib OS=Homo sapiens GN=MYO1B PE=1 SV=3;>	12	18	18	18	0	18	0	18	0	18	26.3	26.3	26.3	124.95	1078	1078;1107;1136;303;192;381;163;149;83;1043;688;881	3.48			22	20								42	9.5108e-163	1.0424	1.2137	12.57	42	NaN	NaN	#VALUE!	NaN	0	1.0424	1.2137	-0.279412
P62269;J3JS69	P62269	18;5	18;5	18;5	40S ribosomal protein S18	RPS18	>sp|P62269|RS18_HUMAN 40S ribosomal protein S18 OS=Homo sapiens GN=RPS18 PE=1 SV=3	2	18	18	18	10	15	10	15	10	15	65.1	65.1	65.1	17.718	152	152;82	7.96						4	19	41	6	9	24	55	1.6508e-63	1.036	1.1899	21.436	76	0.5854	0.85491	-0.226156	20.91	22	1.0871	1.2299	-0.298541
P26006;P26006-1;B4DDT0;D6R9X8;K7EMU3;H0YA49;H0YA32	P26006;P26006-1	18;18;5;4;3;3;2	18;18;5;4;3;3;2	18;18;5;4;3;3;2	Integrin alpha-3;Integrin alpha-3 heavy chain;Integrin alpha-3 light chain	ITGA3	>sp|P26006|ITA3_HUMAN Integrin alpha-3 OS=Homo sapiens GN=ITGA3 PE=1 SV=5;>sp|P26006-1|ITA3_HUMAN Isoform 2 of Integrin alpha-3 OS=Homo sapiens GN=ITGA3	7	18	18	18	4	18	4	18	4	18	23.2	23.2	23.2	116.61	1051	1051;1066;294;142;117;221;84	3.77			28	16	5	2	1	1			11	42	4.8204e-85	0.82886	0.98102	56.841	53	0.52865	0.60342	-0.728766	47.633	11	1.0433	1.245	-0.316146
P14868;Q68CR9;H7BZ35;C9J7S3;C9JLC1;H7C278;C9JQM9	P14868;Q68CR9;H7BZ35	18;15;9;5;5;4;3	18;15;9;5;5;4;3	18;15;9;5;5;4;3	Aspartate--tRNA ligase, cytoplasmic	DARS;DKFZp781B11202	>sp|P14868|SYDC_HUMAN Aspartate--tRNA ligase, cytoplasmic OS=Homo sapiens GN=DARS PE=1 SV=2;>tr|Q68CR9|Q68CR9_HUMAN Aspartate--tRNA ligase, cytoplasmic OS=Homo sapiens GN=DKFZp781B11202 PE=2 SV=1;>tr|H7BZ35|H7BZ35_HUMAN Aspartate--tRNA ligase, cytoplasmic	7	18	18	18	2	18	2	18	2	18	38.5	38.5	38.5	57.136	501	501;401;188;176;182;179;135	4.84				8	20	3					3	28	1.0507e-66	1.0833	1.2285	19.026	31	0.58023	0.771	-0.375197	14.661	3	1.1082	1.2563	-0.329181
Q96HC4;E9PBF5;Q96HC4-4;D6RB78;Q96HC4-3;F5H0X8;Q96HC4-2;D3YTJ1;F5H7Y0;H0Y8Y3;H0YBI4;H0Y929;D6RAA1;D6RGG6;Q96HC4-5	Q96HC4;E9PBF5;Q96HC4-4;D6RB78;Q96HC4-3;F5H0X8;Q96HC4-2;D3YTJ1;F5H7Y0	18;15;15;13;10;10;10;10;9;7;6;3;1;1;1	18;15;15;13;10;10;10;10;9;7;6;3;1;1;1	18;15;15;13;10;10;10;10;9;7;6;3;1;1;1	PDZ and LIM domain protein 5	PDLIM5	>sp|Q96HC4|PDLI5_HUMAN PDZ and LIM domain protein 5 OS=Homo sapiens GN=PDLIM5 PE=1 SV=5;>tr|E9PBF5|E9PBF5_HUMAN PDZ and LIM domain protein 5 OS=Homo sapiens GN=PDLIM5 PE=2 SV=1;>sp|Q96HC4-4|PDLI5_HUMAN Isoform 4 of PDZ and LIM domain protein 5 OS=Homo sapi	15	18	18	18	18	8	18	8	18	8	39.9	39.9	39.9	63.944	596	596;483;487;625;214;214;234;234;474;231;196;85;38;47;136	4.99	2	2	2	23	31	16	12				74	14	4.2029e-93	0.62282	0.84209	38.386	87	0.59631	0.81023	-0.303597	35.046	73	1.1298	1.3181	-0.39846
Q9NVI7-2;Q9NVI7;H0Y2W2;Q9NVI7-3;Q5T2N8;J3QSF3;Q5SV16	Q9NVI7-2;Q9NVI7;H0Y2W2;Q9NVI7-3	18;17;12;10;5;2;2	18;17;12;10;5;2;2	10;10;8;6;4;2;2	ATPase family AAA domain-containing protein 3A	ATAD3A	>sp|Q9NVI7-2|ATD3A_HUMAN Isoform 2 of ATPase family AAA domain-containing protein 3A OS=Homo sapiens GN=ATAD3A;>sp|Q9NVI7|ATD3A_HUMAN ATPase family AAA domain-containing protein 3A OS=Homo sapiens GN=ATAD3A PE=1 SV=2;>tr|H0Y2W2|H0Y2W2_HUMAN ATPase family A	7	18	18	10	11	10	11	10	5	6	35.8	35.8	21.7	66.217	586	586;634;572;507;411;131;201	4.98			2	9	21	6	3				26	15	1.4963e-64	0.63792	0.78825	34.924	41	0.55186	0.75155	-0.412059	14.501	26	1.1915	1.4115	-0.497229
Q3KQU3-4;Q3KQU3;Q3KQU3-2;Q3KQU3-3;H0YF21;C9JIR3;E9PLH3	Q3KQU3-4;Q3KQU3;Q3KQU3-2;Q3KQU3-3	18;18;17;10;3;2;1	18;18;17;10;3;2;1	18;18;17;10;3;2;1	MAP7 domain-containing protein 1	MAP7D1	>sp|Q3KQU3-4|MA7D1_HUMAN Isoform 4 of MAP7 domain-containing protein 1 OS=Homo sapiens GN=MAP7D1;>sp|Q3KQU3|MA7D1_HUMAN MAP7 domain-containing protein 1 OS=Homo sapiens GN=MAP7D1 PE=1 SV=1;>sp|Q3KQU3-2|MA7D1_HUMAN Isoform 2 of MAP7 domain-containing protei	7	18	18	18	17	5	17	5	17	5	30.9	30.9	30.9	89.466	808	808;841;803;377;248;244;140	3.99		1	24	27	11	4	2				61	8	3.8057e-82	0.50812	0.6377	40.421	68	0.49434	0.6233	-0.682001	31.963	60	1.2744	1.4977	-0.582749
P06744;P06744-2;K7EP41;K7ERC6;K7ELR7;K7ERK8;K7EIL4	P06744;P06744-2	18;16;5;4;3;2;1	18;16;5;4;3;2;1	14;12;5;4;3;2;1	Glucose-6-phosphate isomerase	GPI	>sp|P06744|G6PI_HUMAN Glucose-6-phosphate isomerase OS=Homo sapiens GN=GPI PE=1 SV=4;>sp|P06744-2|G6PI_HUMAN Isoform 2 of Glucose-6-phosphate isomerase OS=Homo sapiens GN=GPI	7	18	18	14	6	15	6	15	5	11	45.3	45.3	36.2	63.146	558	558;569;159;162;146;133;110	5.02				24	35	18	4				18	63	1.2501e-179	1.3384	1.4804	39.698	81	0.45941	0.62534	-0.677287	18.289	18	1.3748	1.5474	-0.629846
Q9Y3Z3;Q9Y3Z3-4;Q9Y3Z3-3;Q9Y3Z3-2;A6NDZ3	Q9Y3Z3;Q9Y3Z3-4;Q9Y3Z3-3;Q9Y3Z3-2	18;17;15;15;4	18;17;15;15;4	18;17;15;15;4	SAM domain and HD domain-containing protein 1	SAMHD1	>sp|Q9Y3Z3|SAMH1_HUMAN Deoxynucleoside triphosphate triphosphohydrolase SAMHD1 OS=Homo sapiens GN=SAMHD1 PE=1 SV=2;>sp|Q9Y3Z3-4|SAMH1_HUMAN Isoform 4 of Deoxynucleoside triphosphate triphosphohydrolase SAMHD1 OS=Homo sapiens GN=SAMHD1;>sp|Q9Y3Z3-3|SAMH1_HU	5	18	18	18	4	16	4	16	4	16	35.9	35.9	35.9	72.2	626	626;591;556;602;170	4.62				19	18	2	1				4	36	1.2395e-101	1.3845	1.6426	28.928	40	0.52989	0.73275	-0.448607	20.115	4	1.4328	1.6639	-0.734569
P63241;I3L397;I3L504;P63241-2;Q6IS14;F8WCJ1;C9J7B5;C9J4W5;Q9GZV4	P63241;I3L397;I3L504;P63241-2;Q6IS14	18;17;17;16;12;8;8;8;8	18;17;17;16;12;8;8;8;8	18;17;17;16;12;8;8;8;8	Eukaryotic translation initiation factor 5A-1;Eukaryotic translation initiation factor 5A-1-like	EIF5A;EIF5AL1	>sp|P63241|IF5A1_HUMAN Eukaryotic translation initiation factor 5A-1 OS=Homo sapiens GN=EIF5A PE=1 SV=2;>tr|I3L397|I3L397_HUMAN Eukaryotic translation initiation factor 5A-1 (Fragment) OS=Homo sapiens GN=EIF5A PE=2 SV=1;>tr|I3L504|I3L504_HUMAN Eukaryotic t	9	18	18	18	7	16	7	16	7	16	88.3	88.3	88.3	16.832	154	154;147;186;184;154;105;109;115;153	7.81						2	21	22	1	7	10	43	8.0427e-152	1.4897	1.6805	39.785	52	0.46251	0.63427	-0.656831	16.755	10	1.5243	1.7259	-0.787349
Q06323;H0YNE3;Q06323-2;H0YLU2;H0YKK6	Q06323;H0YNE3;Q06323-2	18;17;17;5;4	18;17;17;5;4	18;17;17;5;4	Proteasome activator complex subunit 1	PSME1	>sp|Q06323|PSME1_HUMAN Proteasome activator complex subunit 1 OS=Homo sapiens GN=PSME1 PE=1 SV=1;>tr|H0YNE3|H0YNE3_HUMAN Proteasome activator complex subunit 1 OS=Homo sapiens GN=PSME1 PE=2 SV=1;>sp|Q06323-2|PSME1_HUMAN Isoform 2 of Proteasome activator co	5	18	18	18	14	13	14	13	14	13	58.6	58.6	58.6	28.723	249	249;233;250;114;90	6.5					1	25	28				28	26	2.6178e-99	1.0671	1.0977	59.127	53	0.42779	0.61156	-0.709434	39.08	27	1.6446	1.8166	-0.861241
P22234;P22234-2;E9PBS1;D6RF62	P22234;P22234-2;E9PBS1;D6RF62	18;18;17;9	18;18;17;9	18;18;17;9	Multifunctional protein ADE2;Phosphoribosylaminoimidazole-succinocarboxamide synthase;Phosphoribosylaminoimidazole carboxylase	PAICS	>sp|P22234|PUR6_HUMAN Multifunctional protein ADE2 OS=Homo sapiens GN=PAICS PE=1 SV=3;>sp|P22234-2|PUR6_HUMAN Isoform 2 of Multifunctional protein ADE2 OS=Homo sapiens GN=PAICS;>tr|E9PBS1|E9PBS1_HUMAN Phosphoribosylaminoimidazole carboxylase (Fragment) OS=	4	18	18	18	10	12	10	12	10	12	40	40	40	47.079	425	425;432;413;333	5.72					14	22	3				14	25	9.9506e-99	1.5986	1.8217	71.824	38	0.38003	0.52498	-0.929666	20.028	14	1.7932	1.9844	-0.988703
P18583-2;P18583-5;P18583-10;P18583-4;P18583-7;P18583;P18583-9;P18583-6;P18583-3;H7C1M2;P18583-8;J3QSZ5;H7C1S4;H7C257;H7C2G8	P18583-2;P18583-5;P18583-10;P18583-4;P18583-7;P18583;P18583-9;P18583-6;P18583-3;H7C1M2	18;18;17;17;17;17;17;16;16;10;8;4;1;1;1	18;18;17;17;17;17;17;16;16;10;8;4;1;1;1	18;18;17;17;17;17;17;16;16;10;8;4;1;1;1	Protein SON	SON	>sp|P18583-2|SON_HUMAN Isoform A of Protein SON OS=Homo sapiens GN=SON;>sp|P18583-5|SON_HUMAN Isoform D of Protein SON OS=Homo sapiens GN=SON;>sp|P18583-10|SON_HUMAN Isoform J of Protein SON OS=Homo sapiens GN=SON;>sp|P18583-4|SON_HUMAN Isoform C of Protei	15	18	18	18	3	17	3	17	3	17	16.8	16.8	16.8	232.3	2140	2140;2459;2282;2325;2386;2426;2466;2108;2303;1454;699;454;92;97;343	1.28	19	5	1								4	21	5.9003e-93	1.5116	1.8686	51.223	25	0.5722	0.66843	-0.581152	28.033	4	1.7216	2.074	-1.05242
P15121;E9PCX2;E9PEF9;C9JRZ8-2;C9JRZ8	P15121;E9PCX2	18;13;7;1;1	18;13;7;1;1	18;13;7;1;1	Aldose reductase	AKR1B1	>sp|P15121|ALDR_HUMAN Aldose reductase OS=Homo sapiens GN=AKR1B1 PE=1 SV=3;>tr|E9PCX2|E9PCX2_HUMAN Aldose reductase OS=Homo sapiens GN=AKR1B1 PE=2 SV=1	5	18	18	18	6	16	6	16	6	16	75	75	75	35.853	316	316;263;102;316;344	6.16					21	32	20	5		1	13	66	6.3579e-146	2.4346	2.6992	76.614	78	0.2703	0.37551	-1.41308	8.2795	13	2.5472	2.8453	-1.50858
Q14240;Q14240-2;E7EQG2;Q9NZE6;J3KSN7;E7EMV8;J3KT04;E9PBH4;F8WE11;C9JUF0;I3L3H2	Q14240;Q14240-2;E7EQG2;Q9NZE6	17;17;15;12;4;3;2;2;2;1;1	6;6;4;4;1;1;0;1;1;1;0	6;6;4;4;1;1;0;1;1;1;0	Eukaryotic initiation factor 4A-II	EIF4A2	>sp|Q14240|IF4A2_HUMAN Eukaryotic initiation factor 4A-II OS=Homo sapiens GN=EIF4A2 PE=1 SV=2;>sp|Q14240-2|IF4A2_HUMAN Isoform 2 of Eukaryotic initiation factor 4A-II OS=Homo sapiens GN=EIF4A2;>tr|E7EQG2|E7EQG2_HUMAN Eukaryotic initiation factor 4A-II OS=H	11	17	6	6	4	17	1	6	1	6	55.5	29.7	29.7	46.402	407	407;408;362;312;109;98;85;96;97;57;125	5.6					7	7	1				1	14	6.1952e-170	0.45755	0.52955	35.971	14	1.1079	1.7768	0.829281	NaN	1	0.45427	0.52855	0.919888
P07339;H7C469;C9JH19;F8WD96;H7C1V0;F8W787	P07339;H7C469;C9JH19;F8WD96	17;13;10;9;7;6	17;13;10;9;7;6	17;13;10;9;7;6	Cathepsin D;Cathepsin D light chain;Cathepsin D heavy chain	CTSD	>sp|P07339|CATD_HUMAN Cathepsin D OS=Homo sapiens GN=CTSD PE=1 SV=1;>tr|H7C469|H7C469_HUMAN Uncharacterized protein (Fragment) OS=Homo sapiens PE=3 SV=1;>tr|C9JH19|C9JH19_HUMAN Cathepsin D light chain (Fragment) OS=Homo sapiens GN=CTSD PE=2 SV=1;>tr|F8WD96	6	17	17	17	9	15	9	15	9	15	40.8	40.8	40.8	44.552	412	412;379;299;276;189;199	6.21				2	15	28	36				21	60	5.7747e-126	0.66711	0.72075	77.044	80	1.1091	1.4354	0.521453	33.818	21	0.6274	0.6674	0.583376
O43852;O43852-3;O43852-2;O43852-4;O43852-6;O43852-5;O43852-15;O43852-10;H0Y875;O43852-9;O43852-13;O43852-14;O43852-11;O43852-8;O43852-12;O43852-7	O43852;O43852-3;O43852-2;O43852-4;O43852-6;O43852-5;O43852-15;O43852-10;H0Y875;O43852-9	17;17;15;15;12;11;10;10;9;9;7;7;7;7;5;5	17;17;15;15;12;11;10;10;9;9;7;7;7;7;5;5	17;17;15;15;12;11;10;10;9;9;7;7;7;7;5;5	Calumenin	CALU	>sp|O43852|CALU_HUMAN Calumenin OS=Homo sapiens GN=CALU PE=1 SV=2;>sp|O43852-3|CALU_HUMAN Isoform 3 of Calumenin OS=Homo sapiens GN=CALU;>sp|O43852-2|CALU_HUMAN Isoform 2 of Calumenin OS=Homo sapiens GN=CALU;>sp|O43852-4|CALU_HUMAN Isoform 4 of Calumenin O	16	17	17	17	5	16	5	16	5	16	68.3	68.3	68.3	37.106	315	315;323;315;323;265;229;164;224;147;154;139;147;170;201;74;161	5.44				3	30	16	4	1			14	40	1.9019e-142	0.6286	0.70507	49.952	54	1.0538	1.4267	0.512682	15.267	14	0.59231	0.67469	0.567703
P49591;Q5T5C7	P49591;Q5T5C7	17;17	17;17	17;17	Serine--tRNA ligase, cytoplasmic	SARS	>sp|P49591|SYSC_HUMAN Serine--tRNA ligase, cytoplasmic OS=Homo sapiens GN=SARS PE=1 SV=3;>tr|Q5T5C7|Q5T5C7_HUMAN Serine--tRNA ligase, cytoplasmic OS=Homo sapiens GN=SARS PE=2 SV=1	2	17	17	17	9	11	9	11	9	11	32.9	32.9	32.9	58.777	514	514;536	5.05				9	25	5	3				21	21	2.2476e-79	0.77679	0.89759	39.933	41	0.99995	1.4102	0.4959	8.82	20	0.57817	0.67659	0.563646
P36871;P36871-2;P36871-3	P36871;P36871-2;P36871-3	17;14;13	17;14;13	17;14;13	Phosphoglucomutase-1	PGM1	>sp|P36871|PGM1_HUMAN Phosphoglucomutase-1 OS=Homo sapiens GN=PGM1 PE=1 SV=3;>sp|P36871-2|PGM1_HUMAN Isoform 2 of Phosphoglucomutase-1 OS=Homo sapiens GN=PGM1;>sp|P36871-3|PGM1_HUMAN Isoform 3 of Phosphoglucomutase-1 OS=Homo sapiens GN=PGM1	3	17	17	17	3	16	3	16	3	16	43.6	43.6	43.6	61.448	562	562;580;365	4.74				15	20	3	1				3	36	2.5933e-100	0.6764	0.76631	18.741	39	0.80597	1.1857	0.245739	21.157	3	0.66872	0.76144	0.393198
Q9UQ80;F8VR77;H0YIN7;F8W0A3;F8VZ69	Q9UQ80	17;8;4;4;1	17;8;4;4;1	17;8;4;4;1	Proliferation-associated protein 2G4	PA2G4	>sp|Q9UQ80|PA2G4_HUMAN Proliferation-associated protein 2G4 OS=Homo sapiens GN=PA2G4 PE=1 SV=3	5	17	17	17	6	15	6	15	6	15	52.5	52.5	52.5	43.786	394	394;284;163;187;65	5.4				6	21	20	3				9	41	1.1664e-112	0.72742	0.80616	21.149	47	0.85902	1.1838	0.243425	10.216	6	0.71744	0.79358	0.333552
Q15691;Q9UPY8-2	Q15691	17;1	17;1	16;0	Microtubule-associated protein RP/EB family member 1	MAPRE1	>sp|Q15691|MARE1_HUMAN Microtubule-associated protein RP/EB family member 1 OS=Homo sapiens GN=MAPRE1 PE=1 SV=3	2	17	17	16	9	14	9	14	8	14	68.3	68.3	68.3	29.999	268	268;266	6.37					7	28	21	4			18	42	6.959e-100	0.76435	0.86695	24.577	58	0.87641	1.243	0.313826	12.464	18	0.72241	0.79459	0.331717
P18858;M0R0Q7;Q2TB12;B4DTU4;F5GZ28;B4E135;M0QY71;M0R1G7;M0R1S4	P18858;M0R0Q7;Q2TB12;B4DTU4;F5GZ28;B4E135	17;16;16;15;13;11;3;3;2	17;16;16;15;13;11;3;3;2	17;16;16;15;13;11;3;3;2	DNA ligase 1;DNA ligase	LIG1	>sp|P18858|DNLI1_HUMAN DNA ligase 1 OS=Homo sapiens GN=LIG1 PE=1 SV=1;>tr|M0R0Q7|M0R0Q7_HUMAN DNA ligase OS=Homo sapiens GN=LIG1 PE=3 SV=1;>tr|Q2TB12|Q2TB12_HUMAN DNA ligase OS=Homo sapiens GN=LIG1 PE=2 SV=1;>tr|B4DTU4|B4DTU4_HUMAN DNA ligase OS=Homo sapie	9	17	17	17	9	11	9	11	9	11	28.2	28.2	28.2	101.73	919	919;800;801;888;851;415;145;150;28	3.57			25	17	3	1					26	20	1.946e-97	0.82563	0.95345	26.762	43	0.99876	1.1677	0.22367	22.862	23	0.71643	0.81381	0.297236
P40926;G3XAL0;E9PDB2	P40926;G3XAL0;E9PDB2	17;14;12	17;14;12	17;14;12	Malate dehydrogenase, mitochondrial;Malate dehydrogenase	MDH2	>sp|P40926|MDHM_HUMAN Malate dehydrogenase, mitochondrial OS=Homo sapiens GN=MDH2 PE=1 SV=3;>tr|G3XAL0|G3XAL0_HUMAN Malate dehydrogenase OS=Homo sapiens GN=MDH2 PE=2 SV=1;>tr|E9PDB2|E9PDB2_HUMAN Malate dehydrogenase, mitochondrial OS=Homo sapiens GN=MDH2 P	3	17	17	17	7	15	7	15	7	15	59.5	59.5	59.5	35.503	338	338;231;296	5.93					17	26	13				21	35	2.6001e-145	0.82046	0.91209	17.687	56	0.82235	1.1018	0.139862	13.257	21	0.8173	0.82795	0.272384
P45974-2;P45974;F5H571;H7C5J3	P45974-2;P45974	17;17;2;1	17;17;2;1	16;16;2;0	Ubiquitin carboxyl-terminal hydrolase 5	USP5	>sp|P45974-2|UBP5_HUMAN Isoform Short of Ubiquitin carboxyl-terminal hydrolase 5 OS=Homo sapiens GN=USP5;>sp|P45974|UBP5_HUMAN Ubiquitin carboxyl-terminal hydrolase 5 OS=Homo sapiens GN=USP5 PE=1 SV=2	4	17	17	16	8	13	8	13	8	12	34.3	34.3	33.1	93.307	835	835;858;137;299	4.12			14	25	5	3	3				25	25	5.7978e-132	0.74579	0.92447	52.507	49	0.83288	1.0616	0.0862403	74.529	24	0.70524	0.84121	0.249462
Q86W92-2;Q86W92-4;Q86W92;Q86W92-3;F5GZP6;H0YFE4;F5H6Q7;F5H0E0;F5H495;Q86W92-5;E9PP16;Q8ND30-3;Q8ND30-2;Q8ND30;H0YGH8	Q86W92-2;Q86W92-4;Q86W92;Q86W92-3	17;16;16;14;8;7;2;2;2;2;2;2;2;2;1	17;16;16;14;8;7;2;2;2;2;2;2;2;2;1	17;16;16;14;8;7;2;2;2;2;2;2;2;2;1	Liprin-beta-1	PPFIBP1	>sp|Q86W92-2|LIPB1_HUMAN Isoform 2 of Liprin-beta-1 OS=Homo sapiens GN=PPFIBP1;>sp|Q86W92-4|LIPB1_HUMAN Isoform 4 of Liprin-beta-1 OS=Homo sapiens GN=PPFIBP1;>sp|Q86W92|LIPB1_HUMAN Liprin-beta-1 OS=Homo sapiens GN=PPFIBP1 PE=1 SV=2;>sp|Q86W92-3|LIPB1_HUMAN	15	17	17	17	7	11	7	11	7	11	23.1	23.1	23.1	113.18	1005	1005;980;1011;858;744;242;86;109;152;170;718;733;764;876;205	3.5			19	13	2						16	18	7.5543e-92	0.77405	0.93702	22.378	32	0.78631	0.97686	-0.0337763	11.367	14	0.74688	0.84611	0.241083
Q04917;A2IDB2;F8WEB6;A2IDB1	Q04917;A2IDB2	17;9;4;4	12;6;3;3	12;6;3;3	14-3-3 protein eta	YWHAH	>sp|Q04917|1433F_HUMAN 14-3-3 protein eta OS=Homo sapiens GN=YWHAH PE=1 SV=4;>tr|A2IDB2|A2IDB2_HUMAN 14-3-3 protein eta (Fragment) OS=Homo sapiens GN=YWHAH PE=2 SV=1	4	17	12	12	7	16	4	12	4	12	58.5	53.3	53.3	28.218	246	246;162;39;72	6.5						21	21				10	32	1.0246e-90	0.79241	0.90068	14.964	42	0.77896	1.1152	0.157302	8.1574	10	0.80327	0.84955	0.235229
Q14103-3;Q14103;H0Y8G5;D6RAF8;H0YA96;Q14103-4;B4DTC3;Q14103-2;D6RD83;D6RF44;D6RBQ9;F5H6R6	Q14103-3;Q14103;H0Y8G5;D6RAF8;H0YA96;Q14103-4;B4DTC3;Q14103-2	17;17;15;14;13;13;13;13;8;8;7;6	17;17;15;14;13;13;13;13;8;8;7;6	15;15;13;12;11;11;11;11;8;6;5;6	Heterogeneous nuclear ribonucleoprotein D0	HNRNPD	>sp|Q14103-3|HNRPD_HUMAN Isoform 3 of Heterogeneous nuclear ribonucleoprotein D0 OS=Homo sapiens GN=HNRNPD;>sp|Q14103|HNRPD_HUMAN Heterogeneous nuclear ribonucleoprotein D0 OS=Homo sapiens GN=HNRNPD PE=1 SV=1;>tr|H0Y8G5|H0Y8G5_HUMAN Heterogeneous nuclear r	12	17	17	15	8	12	8	12	6	11	49.3	49.3	46.1	32.834	306	306;355;261;221;210;287;303;336;92;112;155;201	5.52				3	24	17	6				20	30	1.3023e-73	0.79325	0.91851	19.263	49	0.89187	1.1729	0.23008	14.638	20	0.78142	0.85572	0.224789
Q15293;B7Z1M1;E9PP27	Q15293;B7Z1M1	17;13;2	17;13;2	17;13;2	Reticulocalbin-1	RCN1	>sp|Q15293|RCN1_HUMAN Reticulocalbin-1 OS=Homo sapiens GN=RCN1 PE=1 SV=1;>tr|B7Z1M1|B7Z1M1_HUMAN Reticulocalbin-1 OS=Homo sapiens GN=RCN1 PE=2 SV=1	3	17	17	17	7	13	7	13	7	13	61	61	61	38.89	331	331;280;58	5.6				3	23	20	6	1			17	36	2.9421e-111	0.79083	0.91296	14.707	53	0.81271	1.1262	0.171463	8.8938	17	0.76422	0.86088	0.216116
P30837	P30837	17	17	17	Aldehyde dehydrogenase X, mitochondrial	ALDH1B1	>sp|P30837|AL1B1_HUMAN Aldehyde dehydrogenase X, mitochondrial OS=Homo sapiens GN=ALDH1B1 PE=1 SV=3	1	17	17	17	4	15	4	15	4	15	44.9	44.9	44.9	57.206	517	517	5.1				9	19	9	2				10	29	4.1493e-107	0.79601	0.91203	21.903	39	0.8517	1.167	0.222805	13.943	10	0.75774	0.86764	0.204832
O60664-4;O60664-3;O60664;K7ERZ3;K7EL96;O60664-2;K7ER39;K7EJD0	O60664-4;O60664-3;O60664;K7ERZ3	17;17;17;12;8;8;4;1	17;17;17;12;8;8;4;1	17;17;17;12;8;8;4;1	Perilipin-3	PLIN3	>sp|O60664-4|PLIN3_HUMAN Isoform 4 of Perilipin-3 OS=Homo sapiens GN=PLIN3;>sp|O60664-3|PLIN3_HUMAN Isoform 3 of Perilipin-3 OS=Homo sapiens GN=PLIN3;>sp|O60664|PLIN3_HUMAN Perilipin-3 OS=Homo sapiens GN=PLIN3 PE=1 SV=3;>tr|K7ERZ3|K7ERZ3_HUMAN Perilipin-3	8	17	17	17	8	15	8	15	8	15	61.1	61.1	61.1	45.803	422	422;433;434;292;173;251;168;35	5.65					24	25	5				15	39	1.412e-168	0.80939	0.91676	15.175	54	0.76765	1.0233	0.0332292	13.895	15	0.81812	0.88658	0.173677
P30153;F5H3X9;B3KQV6;C9J9C1;E9PH38;H0YDG7;J3KR29;P30154-5;P30154-4;P30154;P30154-3;P30154-2;M0QXG4;M0R0K6	P30153;F5H3X9;B3KQV6	17;16;14;7;5;2;2;2;2;2;2;2;1;1	17;16;14;7;5;2;2;2;2;2;2;2;1;1	17;16;14;7;5;2;2;2;2;2;2;2;1;1	Serine/threonine-protein phosphatase 2A 65 kDa regulatory subunit A alpha isoform	PPP2R1A	>sp|P30153|2AAA_HUMAN Serine/threonine-protein phosphatase 2A 65 kDa regulatory subunit A alpha isoform OS=Homo sapiens GN=PPP2R1A PE=1 SV=4;>tr|F5H3X9|F5H3X9_HUMAN Serine/threonine-protein phosphatase 2A 65 kDa regulatory subunit A alpha isoform OS=Homo s	14	17	17	17	3	17	3	17	3	17	37.5	37.5	37.5	65.308	589	589;534;410;395;132;224;440;474;556;601;603;667;38;66	5.06				21	27	11	7				7	59	2.4823e-139	0.81	0.91564	25.892	66	0.7862	1.0178	0.0254541	12.528	7	0.81153	0.89322	0.162913
P54886-2;P54886	P54886-2;P54886	17;17	17;17	17;17	Delta-1-pyrroline-5-carboxylate synthase;Glutamate 5-kinase;Gamma-glutamyl phosphate reductase	ALDH18A1	>sp|P54886-2|P5CS_HUMAN Isoform Short of Delta-1-pyrroline-5-carboxylate synthase OS=Homo sapiens GN=ALDH18A1;>sp|P54886|P5CS_HUMAN Delta-1-pyrroline-5-carboxylate synthase OS=Homo sapiens GN=ALDH18A1 PE=1 SV=2	2	17	17	17	2	16	2	16	2	16	29.3	29.3	29.3	87.088	793	793;795	4.27				19	7						2	24	4.9779e-125	0.81303	0.92291	16.175	26	0.80312	1.1037	0.142348	10.862	2	0.81303	0.91809	0.123293
Q15056-2;Q15056;REV__B4E135	Q15056-2;Q15056	17;17;1	17;17;1	17;17;1	Eukaryotic translation initiation factor 4H	EIF4H	>sp|Q15056-2|IF4H_HUMAN Isoform Short of Eukaryotic translation initiation factor 4H OS=Homo sapiens GN=EIF4H;>sp|Q15056|IF4H_HUMAN Eukaryotic translation initiation factor 4H OS=Homo sapiens GN=EIF4H PE=1 SV=5	3	17	17	17	11	12	11	12	11	12	62.7	62.7	62.7	25.2	228	228;248;415	6.75					1	16	29	5			23	28	3.0809e-99	0.75228	1.0213	16.839	50	0.71713	1.0731	0.101785	13.536	23	0.7999	0.92434	0.113504
Q08J23;Q08J23-2;G3V1R4;D6RAS3	Q08J23;Q08J23-2;G3V1R4	17;16;13;3	17;16;13;3	17;16;13;3	tRNA (cytosine(34)-C(5))-methyltransferase	NSUN2	>sp|Q08J23|NSUN2_HUMAN tRNA (cytosine(34)-C(5))-methyltransferase OS=Homo sapiens GN=NSUN2 PE=1 SV=2;>sp|Q08J23-2|NSUN2_HUMAN Isoform 2 of tRNA (cytosine(34)-C(5))-methyltransferase OS=Homo sapiens GN=NSUN2;>tr|G3V1R4|G3V1R4_HUMAN NOL1/NOP2/Sun domain fami	4	17	17	17	6	12	6	12	6	12	40.4	40.4	40.4	86.47	767	767;732;531;202	3.65			9	17							6	20	4.0113e-80	0.77318	0.93966	14.64	26	0.64248	0.79673	-0.327837	6.6508	6	0.80767	0.98547	0.0211161
F5H365;Q15436;B3KXI2;F5H6C4;G3V5X8;G3V4Q2;G3V4V1;G3V1W4;G3V3G5;G3V2R6;G3V5K1	F5H365;Q15436;B3KXI2;F5H6C4	17;17;13;13;3;3;3;3;3;3;2	17;17;13;13;3;3;3;3;3;3;2	15;15;12;12;2;2;2;2;2;2;1	Protein transport protein Sec23A	SEC23A	>tr|F5H365|F5H365_HUMAN Protein transport protein Sec23A OS=Homo sapiens GN=SEC23A PE=2 SV=1;>sp|Q15436|SC23A_HUMAN Protein transport protein Sec23A OS=Homo sapiens GN=SEC23A PE=1 SV=2;>tr|B3KXI2|B3KXI2_HUMAN Protein transport protein Sec23A OS=Homo sapien	11	17	17	15	4	16	4	16	3	14	34.6	34.6	33.3	82.968	736	736;765;563;663;85;86;94;108;140;169;40	4.31			1	26	7	1	1				12	24	6.0237e-152	0.87619	0.99404	13.929	35	0.6978	0.90576	-0.142799	14.983	12	0.91661	1.0258	-0.0367495
P12236;I7HJJ0	P12236;I7HJJ0	17;12	17;12	5;3	ADP/ATP translocase 3	SLC25A6	>sp|P12236|ADT3_HUMAN ADP/ATP translocase 3 OS=Homo sapiens GN=SLC25A6 PE=1 SV=4;>tr|I7HJJ0|I7HJJ0_HUMAN ADP/ATP translocase 3 (Fragment) OS=Homo sapiens GN=SLC25A6 PE=4 SV=1	2	17	17	5	6	16	6	16	2	5	55.4	55.4	20.5	32.866	298	298;158	4.5	14	14	13	9	7	21	22	2		2	25	79	3.4999e-54	0.88477	1.0179	32.704	103	0.77587	0.93338	-0.0994635	52.367	25	0.90609	1.029	-0.041243
Q8TAQ2;Q8TAQ2-2;Q8TAQ2-3;F8VXC8;F8VZW6	Q8TAQ2;Q8TAQ2-2;Q8TAQ2-3;F8VXC8	17;16;16;16;2	17;16;16;16;2	13;12;12;12;2	SWI/SNF complex subunit SMARCC2	SMARCC2	>sp|Q8TAQ2|SMRC2_HUMAN SWI/SNF complex subunit SMARCC2 OS=Homo sapiens GN=SMARCC2 PE=1 SV=1;>sp|Q8TAQ2-2|SMRC2_HUMAN Isoform 2 of SWI/SNF complex subunit SMARCC2 OS=Homo sapiens GN=SMARCC2;>sp|Q8TAQ2-3|SMRC2_HUMAN Isoform 3 of SWI/SNF complex subunit SMARC	5	17	17	13	9	10	9	10	9	6	20.2	20.2	17.2	132.88	1214	1214;1130;1152;1245;105	3.32		1	22	5	3						18	13	6.0026e-122	0.84929	1.0335	21.975	31	0.83708	1.041	0.0579701	20.536	18	0.86144	1.0335	-0.0475384
P33993;P33993-3;P33993-2;C9J8M6	P33993;P33993-3	17;14;7;3	17;14;7;3	17;14;7;3	DNA replication licensing factor MCM7	MCM7	>sp|P33993|MCM7_HUMAN DNA replication licensing factor MCM7 OS=Homo sapiens GN=MCM7 PE=1 SV=4;>sp|P33993-3|MCM7_HUMAN Isoform 3 of DNA replication licensing factor MCM7 OS=Homo sapiens GN=MCM7	4	17	17	17	2	17	2	17	2	17	34.5	34.5	34.5	81.307	719	719;543;389;183	4			1	21	1						2	21	2.4772e-61	0.8883	1.0859	32.744	23	0.67291	0.89789	-0.155389	6.7166	2	0.90108	1.0944	-0.13014
P50991;B7Z9L0;P50991-2;B7Z2F4	P50991;B7Z9L0;P50991-2;B7Z2F4	17;16;14;10	17;16;14;10	17;16;14;10	T-complex protein 1 subunit delta	CCT4	>sp|P50991|TCPD_HUMAN T-complex protein 1 subunit delta OS=Homo sapiens GN=CCT4 PE=1 SV=4;>tr|B7Z9L0|B7Z9L0_HUMAN T-complex protein 1 subunit delta OS=Homo sapiens GN=CCT4 PE=2 SV=1;>sp|P50991-2|TCPD_HUMAN Isoform 2 of T-complex protein 1 subunit delta OS=	4	17	17	17	5	15	5	15	5	15	43.4	43.4	43.4	57.924	539	539;483;509;389	4.96				17	26	11	2				10	46	4.2805e-88	0.98087	1.096	15.15	55	0.62105	0.90349	-0.146419	12.693	10	0.99512	1.1052	-0.144307
Q13283;F5H4D6;E5RIZ6;E5RH42;Q5HYE9;E5RJU8;E5RIF8;E5RI46;E5RH00	Q13283;F5H4D6	17;10;6;5;5;5;4;3;2	17;10;6;5;5;5;4;3;2	16;10;5;4;4;4;3;2;1	Ras GTPase-activating protein-binding protein 1	G3BP1	>sp|Q13283|G3BP1_HUMAN Ras GTPase-activating protein-binding protein 1 OS=Homo sapiens GN=G3BP1 PE=1 SV=1;>tr|F5H4D6|F5H4D6_HUMAN Ras GTPase-activating protein-binding protein 1 OS=Homo sapiens GN=G3BP1 PE=2 SV=1	9	17	17	16	11	11	11	11	10	10	43.8	43.8	41.2	52.164	466	466;284;148;117;122;153;106;105;37	4.63				24	17	3	2				27	19	1.8593e-86	0.71297	0.94386	20.247	46	0.64781	0.8427	-0.246909	13.853	27	0.96161	1.1235	-0.168
O00571;O00571-2;B4DLA0;B4E3C4	O00571;O00571-2	17;16;4;4	16;15;4;4	7;6;2;1	ATP-dependent RNA helicase DDX3X	DDX3X	>sp|O00571|DDX3X_HUMAN ATP-dependent RNA helicase DDX3X OS=Homo sapiens GN=DDX3X PE=1 SV=3;>sp|O00571-2|DDX3X_HUMAN Isoform 2 of ATP-dependent RNA helicase DDX3X OS=Homo sapiens GN=DDX3X	4	17	16	7	9	13	9	12	5	4	32	30.4	18.1	73.243	662	662;646;139;308	4.56			1	24	19	3	1				26	22	1.6631e-161	0.78128	1.002	20.222	48	0.68753	0.92058	-0.119385	18.145	26	0.9941	1.1269	-0.172359
O15067;F5GWT9;H0YGH1;J3KTQ5;J3KTL4;J3KT98;J3QSG0;J3QSH6	O15067;F5GWT9	17;11;4;1;1;1;1;1	17;11;4;1;1;1;1;1	17;11;4;1;1;1;1;1	Phosphoribosylformylglycinamidine synthase	PFAS	>sp|O15067|PUR4_HUMAN Phosphoribosylformylglycinamidine synthase OS=Homo sapiens GN=PFAS PE=1 SV=4;>tr|F5GWT9|F5GWT9_HUMAN Phosphoribosylformylglycinamidine synthase OS=Homo sapiens GN=PFAS PE=2 SV=1	8	17	17	17	2	16	2	16	2	16	17.4	17.4	17.4	144.73	1338	1338;914;385;62;103;117;131;135	3.15			22	4							4	22	1.7894e-104	0.94354	1.106	20.479	25	0.55831	0.73493	-0.444321	13.853	4	0.95985	1.1486	-0.199876
P22392-2;Q32Q12;P22392;J3KPD9;E7ERL0;O60361;F6XY72	P22392-2;Q32Q12;P22392;J3KPD9;E7ERL0	17;17;13;13;10;7;6	17;17;13;13;10;7;6	7;7;7;3;0;4;3	Nucleoside diphosphate kinase;Nucleoside diphosphate kinase B	NME1-NME2;NME2;NME1	>sp|P22392-2|NDKB_HUMAN Isoform 3 of Nucleoside diphosphate kinase B OS=Homo sapiens GN=NME2;>tr|Q32Q12|Q32Q12_HUMAN Nucleoside diphosphate kinase OS=Homo sapiens GN=NME1-NME2 PE=2 SV=1;>sp|P22392|NDKB_HUMAN Nucleoside diphosphate kinase B OS=Homo sapiens	7	17	17	7	9	17	9	17	3	7	79.4	79.4	27	30.137	267	267;292;152;197;139;137;77	7.75						7	33	46	6	8	19	81	8.9728e-112	0.94564	1.0803	45.076	95	0.6093	0.90331	-0.146707	58.782	19	0.99991	1.1625	-0.217231
Q99460;Q99460-2;C9J9M4;F8WCE3;H7C378;H7BZR6	Q99460;Q99460-2	17;16;4;2;2;1	17;16;4;2;2;1	17;16;4;2;2;1	26S proteasome non-ATPase regulatory subunit 1	PSMD1	>sp|Q99460|PSMD1_HUMAN 26S proteasome non-ATPase regulatory subunit 1 OS=Homo sapiens GN=PSMD1 PE=1 SV=2;>sp|Q99460-2|PSMD1_HUMAN Isoform 2 of 26S proteasome non-ATPase regulatory subunit 1 OS=Homo sapiens GN=PSMD1	6	17	17	17	5	12	5	12	5	12	25.8	25.8	25.8	105.84	953	953;922;203;48;192;164	3.55		1	17	18	2						10	28	4.5962e-133	0.90755	1.092	22.902	38	0.66059	0.88371	-0.178355	9.4924	10	1.0078	1.1695	-0.225892
P42345;B1AKP8	P42345	17;6	17;6	17;6	Serine/threonine-protein kinase mTOR	MTOR	>sp|P42345|MTOR_HUMAN Serine/threonine-protein kinase mTOR OS=Homo sapiens GN=MTOR PE=1 SV=1	2	17	17	17	0	17	0	17	0	17	10.9	10.9	10.9	288.89	2549	2549;754	2.1		19	2									21	7.2283e-118	0.91576	1.1816	9.8262	21	NaN	NaN	#VALUE!	NaN	0	0.91576	1.1816	-0.240742
P39023;G5E9G0;H7C422;H7C3M2;B5MCW2;F8WCR1	P39023;G5E9G0;H7C422	17;12;9;8;7;5	17;12;9;8;7;5	15;11;9;8;7;4	60S ribosomal protein L3	RPL3	>sp|P39023|RL3_HUMAN 60S ribosomal protein L3 OS=Homo sapiens GN=RPL3 PE=1 SV=2;>tr|G5E9G0|G5E9G0_HUMAN 60S ribosomal protein L3 OS=Homo sapiens GN=RPL3 PE=2 SV=1;>tr|H7C422|H7C422_HUMAN 60S ribosomal protein L3 (Fragment) OS=Homo sapiens GN=RPL3 PE=2 SV=1	6	17	17	15	7	16	7	16	6	15	39.7	39.7	35.7	46.108	403	403;351;305;261;272;180	3.63	17	19	14	10	16	15	7				28	70	2.5294e-76	0.95295	1.1025	31.408	97	0.64439	0.8332	-0.263265	24.945	28	1.0225	1.1872	-0.247563
P46781;B5MCT8;C9JM19;F2Z3C0;A8MXK4	P46781;B5MCT8;C9JM19	17;12;12;4;4	17;12;12;4;4	17;12;12;4;4	40S ribosomal protein S9	RPS9	>sp|P46781|RS9_HUMAN 40S ribosomal protein S9 OS=Homo sapiens GN=RPS9 PE=1 SV=3;>tr|B5MCT8|B5MCT8_HUMAN 40S ribosomal protein S9 OS=Homo sapiens GN=RPS9 PE=2 SV=1;>tr|C9JM19|C9JM19_HUMAN 40S ribosomal protein S9 OS=Homo sapiens GN=RPS9 PE=2 SV=1	5	17	17	17	8	16	8	16	8	16	58.8	58.8	58.8	22.591	194	194;139;156;77;79	6.84						12	26	5			10	33	1.7908e-47	1.0672	1.1517	21.424	43	0.60803	0.83544	-0.259392	8.746	10	1.106	1.1894	-0.250234
P63244;D6RAC2;J3KPE3;D6REE5;D6RHH4;H0Y8W2;H0YAF8;D6R9Z1;H0YAM7;D6R9L0;D6RFX4;D6RAU2;E9PD14;D6RBD0;H0Y8R5;D6RFZ9;D6RGK8;D6RF23;D6R909;H0Y9P0;D6RHJ5;D6RDI0	P63244;D6RAC2;J3KPE3;D6REE5;D6RHH4;H0Y8W2;H0YAF8;D6R9Z1;H0YAM7;D6R9L0;D6RFX4	17;14;14;13;12;11;10;10;10;10;9;8;8;8;7;7;5;5;5;3;3;2	17;14;14;13;12;11;10;10;10;10;9;8;8;8;7;7;5;5;5;3;3;2	17;14;14;13;12;11;10;10;10;10;9;8;8;8;7;7;5;5;5;3;3;2	Guanine nucleotide-binding protein subunit beta-2-like 1	GNB2L1	>sp|P63244|GBLP_HUMAN Guanine nucleotide-binding protein subunit beta-2-like 1 OS=Homo sapiens GN=GNB2L1 PE=1 SV=3;>tr|D6RAC2|D6RAC2_HUMAN Guanine nucleotide-binding protein subunit beta-2-like 1 OS=Homo sapiens GN=GNB2L1 PE=2 SV=1;>tr|J3KPE3|J3KPE3_HUMAN	22	17	17	17	0	17	0	17	0	17	67.2	67.2	67.2	35.076	317	317;269;273;321;233;274;198;237;247;300;194;147;153;160;138;198;71;101;116;83;86;39	6.34					3	22	15	1				41	6.5312e-119	1.1456	1.2407	13.91	36	NaN	NaN	#VALUE!	NaN	0	1.1456	1.2407	-0.311154
O60763;O60763-2;F5H4X1;F5GYR8;F5GZ76;H0Y7C0;REV__R4GMN2;REV__Q5VZ89-5;REV__Q5VZ89-6;REV__Q5VZ89;REV__R4GNB2;REV__R4GN35	O60763;O60763-2;F5H4X1;F5GYR8;F5GZ76	17;17;15;15;11;6;1;1;1;1;1;1	17;17;15;15;11;6;1;1;1;1;1;1	17;17;15;15;11;6;1;1;1;1;1;1	General vesicular transport factor p115	USO1	>sp|O60763|USO1_HUMAN General vesicular transport factor p115 OS=Homo sapiens GN=USO1 PE=1 SV=2;>sp|O60763-2|USO1_HUMAN Isoform 2 of General vesicular transport factor p115 OS=Homo sapiens GN=USO1;>tr|F5H4X1|F5H4X1_HUMAN General vesicular transport factor	12	17	17	17	3	16	3	16	3	16	24.2	24.2	24.2	107.89	962	962;973;947;971;797;638;378;1387;1607;1673;1909;1958	3.53			16	18							3	31	2.3149e-87	1.0564	1.2418	25.274	34	0.51594	0.71592	-0.48213	33.98	3	1.0704	1.2474	-0.318924
Q13045-2;Q13045;Q13045-3;J3KS54;J3KS39;J3QLR6;K7EQZ7;J3QQQ2;J3QQU5	Q13045-2;Q13045;Q13045-3	17;17;15;6;2;2;2;2;1	17;17;15;6;2;2;2;2;1	17;17;15;6;2;2;2;2;1	Protein flightless-1 homolog	FLII	>sp|Q13045-2|FLII_HUMAN Isoform 2 of Protein flightless-1 homolog OS=Homo sapiens GN=FLII;>sp|Q13045|FLII_HUMAN Protein flightless-1 homolog OS=Homo sapiens GN=FLII PE=1 SV=2;>sp|Q13045-3|FLII_HUMAN Isoform 3 of Protein flightless-1 homolog OS=Homo sapiens	9	17	17	17	5	16	5	16	5	16	17.9	17.9	17.9	138.49	1214	1214;1269;1258;700;51;185;207;279;117	3.04			23	1							7	17	2.7075e-122	1.0159	1.2206	27.507	24	0.57002	0.70971	-0.494698	27.991	7	1.0469	1.2694	-0.344147
P02511;E9PR44;E9PJL7;E9PNH7;E9PRA8;H0YCW8;E9PRS4;E9PS12	P02511;E9PR44;E9PJL7;E9PNH7;E9PRA8	16;15;11;10;9;5;4;4	16;15;11;10;9;5;4;4	16;15;11;10;9;5;4;4	Alpha-crystallin B chain	CRYAB	>sp|P02511|CRYAB_HUMAN Alpha-crystallin B chain OS=Homo sapiens GN=CRYAB PE=1 SV=2;>tr|E9PR44|E9PR44_HUMAN Alpha-crystallin B chain (Fragment) OS=Homo sapiens GN=CRYAB PE=2 SV=1;>tr|E9PJL7|E9PJL7_HUMAN Alpha-crystallin B chain (Fragment) OS=Homo sapiens GN	8	16	16	16	10	15	10	15	10	15	90.9	90.9	90.9	20.159	175	175;174;130;106;155;106;69;77	7.38						7	28	16		4	17	38	6.9015e-85	0.30602	0.34118	96.641	54	1.8247	2.5023	1.32325	9.1004	16	0.28652	0.32441	1.62411
O00754-2;O00754;M0R2P5;M0QZ24;M0R174;M0QZG6;M0QYZ1	O00754-2;O00754	16;16;4;4;3;3;1	16;16;4;4;3;3;1	16;16;4;4;3;3;1	Lysosomal alpha-mannosidase;Lysosomal alpha-mannosidase A peptide;Lysosomal alpha-mannosidase B peptide;Lysosomal alpha-mannosidase C peptide;Lysosomal alpha-mannosidase D peptide;Lysosomal alpha-mannosidase E peptide	MAN2B1	>sp|O00754-2|MA2B1_HUMAN Isoform 2 of Lysosomal alpha-mannosidase OS=Homo sapiens GN=MAN2B1;>sp|O00754|MA2B1_HUMAN Lysosomal alpha-mannosidase OS=Homo sapiens GN=MAN2B1 PE=1 SV=3	7	16	16	16	5	13	5	13	5	13	19.3	19.3	19.3	113.61	1010	1010;1011;195;198;140;172;165	5.71				5	10	6	4	2		1	7	21	1.8068e-67	0.3162	0.36907	98.524	28	1.656	2.3707	1.24531	32.9	7	0.2806	0.33377	1.58307
Q9Y570;J3QT22;Q9Y570-2;Q9Y570-3;F5H2D4	Q9Y570;J3QT22;Q9Y570-2	16;16;11;7;3	16;16;11;7;3	16;16;11;7;3	Protein phosphatase methylesterase 1	PPME1	>sp|Q9Y570|PPME1_HUMAN Protein phosphatase methylesterase 1 OS=Homo sapiens GN=PPME1 PE=1 SV=3;>tr|J3QT22|J3QT22_HUMAN Protein phosphatase methylesterase 1 OS=Homo sapiens GN=PPME1 PE=3 SV=1;>sp|Q9Y570-2|PPME1_HUMAN Isoform 2 of Protein phosphatase methyle	5	16	16	16	3	15	3	15	3	15	47.2	47.2	47.2	42.315	386	386;400;199;161;136	5.51					20	18	1				9	30	1.896e-68	0.32618	0.38238	85.473	39	1.6657	2.5757	1.36496	11.469	9	0.30998	0.34694	1.52724
P00387-2;P00387;P00387-3;B1AHF3	P00387-2;P00387;P00387-3;B1AHF3	16;16;16;11	16;16;16;11	16;16;16;11	NADH-cytochrome b5 reductase 3;NADH-cytochrome b5 reductase 3 membrane-bound form;NADH-cytochrome b5 reductase 3 soluble form	CYB5R3	>sp|P00387-2|NB5R3_HUMAN Isoform 2 of NADH-cytochrome b5 reductase 3 OS=Homo sapiens GN=CYB5R3;>sp|P00387|NB5R3_HUMAN NADH-cytochrome b5 reductase 3 OS=Homo sapiens GN=CYB5R3 PE=1 SV=3;>sp|P00387-3|NB5R3_HUMAN Isoform 3 of NADH-cytochrome b5 reductase 3 OS	4	16	16	16	3	16	3	16	3	16	62.9	62.9	62.9	31.628	278	278;301;334;147	6.5					1	22	25				6	42	2.2e-153	0.43848	0.48596	51.835	48	1.2037	1.8002	0.848157	16.502	6	0.42723	0.48218	1.05236
Q7Z406;Q7Z406-6;F2Z2U8;Q7Z406-2;G8JLL9;Q7Z406-4;Q7Z406-5;M0QY43	Q7Z406;Q7Z406-6;F2Z2U8;Q7Z406-2;G8JLL9;Q7Z406-4;Q7Z406-5;M0QY43	16;16;16;16;16;14;13;11	2;2;2;2;2;2;1;1	2;2;2;2;2;2;1;1	Myosin-14	MYH14	>sp|Q7Z406|MYH14_HUMAN Myosin-14 OS=Homo sapiens GN=MYH14 PE=1 SV=2;>sp|Q7Z406-6|MYH14_HUMAN Isoform 6 of Myosin-14 OS=Homo sapiens GN=MYH14;>tr|F2Z2U8|F2Z2U8_HUMAN Myosin-14 OS=Homo sapiens GN=MYH14 PE=2 SV=1;>sp|Q7Z406-2|MYH14_HUMAN Isoform 2 of Myosin-1	8	16	2	2	11	13	2	1	2	1	6.8	1.3	1.3	227.87	1995	1995;2003;2028;2036;2036;1779;1478;1003	2.56	2	5	10	1							7	11	2.4871e-114	0.57091	0.75333	36.337	18	1.1095	1.2918	0.369383	20.35	7	0.50391	0.61493	0.701506
P16989;P16989-3;P16989-2;Q9Y2T7;H0YG22	P16989;P16989-3;P16989-2	16;14;13;5;3	9;7;6;0;3	9;7;6;0;3	Y-box-binding protein 3	YBX3	>sp|P16989|YBOX3_HUMAN Y-box-binding protein 3 OS=Homo sapiens GN=YBX3 PE=1 SV=4;>sp|P16989-3|YBOX3_HUMAN Isoform 3 of Y-box-binding protein 3 OS=Homo sapiens GN=YBX3;>sp|P16989-2|YBOX3_HUMAN Isoform 2 of Y-box-binding protein 3 OS=Homo sapiens GN=YBX3	5	16	9	9	13	7	7	2	7	2	59.9	48.9	48.9	40.089	372	372;342;303;364;170	5.12				4	9	2	2				14	3	1.8609e-89	1.0893	1.5287	49.066	12	1.1297	1.5666	0.647637	14.179	9	0.44128	0.61557	0.700005
P09211;A8MX94	P09211;A8MX94	16;15	16;15	16;15	Glutathione S-transferase P	GSTP1	>sp|P09211|GSTP1_HUMAN Glutathione S-transferase P OS=Homo sapiens GN=GSTP1 PE=1 SV=2;>tr|A8MX94|A8MX94_HUMAN Glutathione S-transferase P OS=Homo sapiens GN=GSTP1 PE=2 SV=1	2	16	16	16	9	11	9	11	9	11	63.3	63.3	63.3	23.356	210	210;174	6.94				1	2	22	46	15		3	33	56	0	0.66245	0.71728	40.32	89	1.0217	1.443	0.529071	13.625	33	0.61083	0.65199	0.617078
B7Z1R5;P38606;C9JA17;C9JVW8	B7Z1R5;P38606	16;16;3;3	16;16;3;3	16;16;3;3	V-type proton ATPase catalytic subunit A	ATP6V1A	>tr|B7Z1R5|B7Z1R5_HUMAN V-type proton ATPase catalytic subunit A OS=Homo sapiens GN=ATP6V1A PE=2 SV=1;>sp|P38606|VATA_HUMAN V-type proton ATPase catalytic subunit A OS=Homo sapiens GN=ATP6V1A PE=1 SV=2	4	16	16	16	3	16	3	16	3	16	32.4	32.4	32.4	64.735	584	584;617;185;221	4.34				23	12						5	30	5.8569e-99	0.59458	0.6824	26.92	34	0.97328	1.3367	0.418676	17.896	5	0.58784	0.66163	0.595903
Q9NR12;Q9NR12-2;Q9NR12-5;Q9NR12-6;Q9NR12-4;D6RH06;Q9NR12-3;D6RF83;H7BYK4;D6RAN1;H0Y8W6	Q9NR12;Q9NR12-2;Q9NR12-5;Q9NR12-6;Q9NR12-4;D6RH06	16;13;9;9;9;9;7;7;5;4;2	16;13;9;9;9;9;7;7;5;4;2	16;13;9;9;9;9;7;7;5;4;2	PDZ and LIM domain protein 7	PDLIM7	>sp|Q9NR12|PDLI7_HUMAN PDZ and LIM domain protein 7 OS=Homo sapiens GN=PDLIM7 PE=1 SV=1;>sp|Q9NR12-2|PDLI7_HUMAN Isoform 2 of PDZ and LIM domain protein 7 OS=Homo sapiens GN=PDLIM7;>sp|Q9NR12-5|PDLI7_HUMAN Isoform 5 of PDZ and LIM domain protein 7 OS=Homo	11	16	16	16	13	12	13	12	13	12	42.2	42.2	42.2	49.844	457	457;423;191;222;287;287;153;173;195;90;120	5.37			1	14	28	20	12				52	23	8.9035e-78	0.9076	1.2882	33.783	72	0.96275	1.3559	0.439251	13.124	51	0.59069	0.68339	0.549219
P16615-5;P16615-2;P16615-3;P16615;P16615-4;H7C5W9;O14983-2;O14983;B3KY17;J3QSY6;F8VSH0;H3BVB2	P16615-5;P16615-2;P16615-3;P16615;P16615-4;H7C5W9	16;16;16;16;13;11;5;5;4;2;2;1	16;16;16;16;13;11;5;5;4;2;2;1	16;16;16;16;13;11;5;5;4;2;2;1	Sarcoplasmic/endoplasmic reticulum calcium ATPase 2	ATP2A2	>sp|P16615-5|AT2A2_HUMAN Isoform 5 of Sarcoplasmic/endoplasmic reticulum calcium ATPase 2 OS=Homo sapiens GN=ATP2A2;>sp|P16615-2|AT2A2_HUMAN Isoform 2 of Sarcoplasmic/endoplasmic reticulum calcium ATPase 2 OS=Homo sapiens GN=ATP2A2;>sp|P16615-3|AT2A2_HUMAN	12	16	16	16	5	14	5	14	5	14	22	22	22	109.73	997	997;997;999;1042;1015;933;994;1001;869;50;57;114	2.57	13	13	15	15							10	46	3.2948e-79	0.59368	0.72827	26.931	56	1.0204	1.2613	0.334911	15.232	10	0.57941	0.69783	0.519052
Q16181-2;E7ES33;E7EPK1;Q16181;G3V1Q4;H0Y3Y4;H0YFF6;F5GZE5;Q5JXL7;Q6ZU15	Q16181-2;E7ES33;E7EPK1;Q16181;G3V1Q4;H0Y3Y4;H0YFF6	16;16;16;16;14;11;11;6;5;1	16;16;16;16;14;11;11;6;5;1	16;16;16;16;14;11;11;6;5;1	Septin-7	2016-09-07	>sp|Q16181-2|SEPT7_HUMAN Isoform 2 of Septin-7 OS=Homo sapiens GN=SEPT7;>tr|E7ES33|E7ES33_HUMAN Septin-7 OS=Homo sapiens GN=SEPT7 PE=2 SV=2;>tr|E7EPK1|E7EPK1_HUMAN Septin-7 OS=Homo sapiens GN=SEPT7 PE=2 SV=1;>sp|Q16181|SEPT7_HUMAN Septin-7 OS=Homo sapiens	10	16	16	16	11	13	11	13	11	13	34.4	34.4	34.4	50.58	436	436;436;436;437;384;373;381;235;88;432	5.44				4	31	21	5				24	37	4.3576e-114	0.68524	0.76259	34.39	61	0.90157	1.2551	0.327802	9.8784	24	0.64586	0.70406	0.50623
P80723;P80723-2	P80723;P80723-2	16;11	16;11	16;11	Brain acid soluble protein 1	BASP1	>sp|P80723|BASP1_HUMAN Brain acid soluble protein 1 OS=Homo sapiens GN=BASP1 PE=1 SV=2;>sp|P80723-2|BASP1_HUMAN Isoform 2 of Brain acid soluble protein 1 OS=Homo sapiens GN=BASP1	2	16	16	16	16	5	16	5	16	5	83.7	83.7	83.7	22.693	227	227;173	4.38	1	6	17	27	25	12	4			1	86	7	4.7663e-143	0.86423	1.075	23.792	93	0.86752	1.0785	0.109026	22.734	86	0.61744	0.70922	0.495695
Q99996-5;Q99996-3;Q99996-2;Q99996;Q99996-6;H7BYL6;Q99996-4;H7BZV6;Q6PJH3	Q99996-5;Q99996-3;Q99996-2;Q99996;Q99996-6	16;16;16;16;16;7;6;2;2	16;16;16;16;16;7;6;2;2	16;16;16;16;16;7;6;2;2	A-kinase anchor protein 9	AKAP9	>sp|Q99996-5|AKAP9_HUMAN Isoform 5 of A-kinase anchor protein 9 OS=Homo sapiens GN=AKAP9;>sp|Q99996-3|AKAP9_HUMAN Isoform 3 of A-kinase anchor protein 9 OS=Homo sapiens GN=AKAP9;>sp|Q99996-2|AKAP9_HUMAN Isoform 2 of A-kinase anchor protein 9 OS=Homo sapien	9	16	16	16	1	16	1	16	1	16	6.6	6.6	6.6	447.75	3857	3857;3899;3907;3911;3929;1769;1643;232;314	1.41	17	9	1								1	26	7.4115e-114	0.55716	0.72844	28.999	27	1.0134	1.2575	0.330558	NaN	1	0.55472	0.71595	0.482069
P53814-5;P53814;P53814-6;P53814-2;C9JGQ0;C9JQZ8;H7C372;C9JBH9;C9JP19;C9JV14;C9JYU8;H7BZZ8;B5MCI0	P53814-5;P53814;P53814-6	16;16;16;4;3;2;2;1;1;1;1;1;1	16;16;16;4;3;2;2;1;1;1;1;1;1	16;16;16;4;3;2;2;1;1;1;1;1;1	Smoothelin	SMTN	>sp|P53814-5|SMTN_HUMAN Isoform B2 of Smoothelin OS=Homo sapiens GN=SMTN;>sp|P53814|SMTN_HUMAN Smoothelin OS=Homo sapiens GN=SMTN PE=1 SV=7;>sp|P53814-6|SMTN_HUMAN Isoform B3 of Smoothelin OS=Homo sapiens GN=SMTN	13	16	16	16	15	6	15	6	15	6	19.2	19.2	19.2	98.918	915	915;917;940;461;37;158;182;91;98;141;152;216;438	3.75		1	20	23	9						42	11	1.0056e-79	0.87517	1.1423	52.397	52	0.91649	1.1652	0.220578	53.054	42	0.61392	0.73788	0.438542
P62937;F8WE65;C9J5S7;Q567Q0;Q9Y536;F5H284;E5RIZ5;A2BFH1	P62937;F8WE65;C9J5S7;Q567Q0	16;10;10;9;3;3;2;2	16;10;10;9;3;3;2;2	16;10;10;9;3;3;2;2	Peptidyl-prolyl cis-trans isomerase A;Peptidyl-prolyl cis-trans isomerase	PPIA	>sp|P62937|PPIA_HUMAN Peptidyl-prolyl cis-trans isomerase A OS=Homo sapiens GN=PPIA PE=1 SV=2;>tr|F8WE65|F8WE65_HUMAN Peptidyl-prolyl cis-trans isomerase OS=Homo sapiens GN=PPIA PE=2 SV=1;>tr|C9J5S7|C9J5S7_HUMAN Peptidyl-prolyl cis-trans isomerase OS=Homo	8	16	16	16	16	14	16	14	16	14	82.4	82.4	82.4	18.012	165	165;120;121;105;164;164;58;164	7.7	2	1	1	2	3	11	59	91	19	21	80	130	8.2081e-207	0.80143	0.92706	35.899	197	0.82415	1.1124	0.153676	51.267	79	0.77726	0.87073	0.199703
Q9NZB2;Q9NZB2-6;Q9NZB2-4;Q9NZB2-2;Q9NZB2-5;H7C0T0;Q5T035	Q9NZB2;Q9NZB2-6;Q9NZB2-4	16;16;15;7;7;5;1	16;16;15;7;7;5;1	16;16;15;7;7;5;1	Constitutive coactivator of PPAR-gamma-like protein 1	FAM120A	>sp|Q9NZB2|F120A_HUMAN Constitutive coactivator of PPAR-gamma-like protein 1 OS=Homo sapiens GN=FAM120A PE=1 SV=2;>sp|Q9NZB2-6|F120A_HUMAN Isoform F of Constitutive coactivator of PPAR-gamma-like protein 1 OS=Homo sapiens GN=FAM120A;>sp|Q9NZB2-4|F120A_HUMA	7	16	16	16	5	14	5	14	5	14	20.3	20.3	20.3	121.89	1118	1118;1146;1072;628;651;494;196	3.18			18	4							8	14	2.1094e-62	0.75869	0.91483	21.721	22	0.86369	0.97537	-0.0359785	17.544	8	0.73474	0.87321	0.195599
D6RGI3;Q9NVA2;D6RER5;Q9NVA2-2;D6RDU5;H0Y961;H0Y9G8;D6RDP1;D6R9Y6	D6RGI3;Q9NVA2;D6RER5;Q9NVA2-2;D6RDU5;H0Y961	16;16;16;15;11;8;4;4;4	16;16;16;15;11;8;4;4;4	10;10;10;9;5;4;4;3;3	Septin-11	2016-09-11	>tr|D6RGI3|D6RGI3_HUMAN Septin 11, isoform CRA_b OS=Homo sapiens GN=SEPT11 PE=2 SV=1;>sp|Q9NVA2|SEP11_HUMAN Septin-11 OS=Homo sapiens GN=SEPT11 PE=1 SV=3;>tr|D6RER5|D6RER5_HUMAN Septin-11 OS=Homo sapiens GN=SEPT11 PE=2 SV=1;>sp|Q9NVA2-2|SEP11_HUMAN Isoform	9	16	16	10	8	14	8	14	5	9	41.4	41.4	28.7	49.005	425	425;429;432;439;372;160;82;126;136	5.21				8	25	12	3				17	31	2.8518e-224	0.77403	0.89927	18.758	47	0.77502	1.0443	0.0625362	12.17	17	0.77173	0.87985	0.184671
P23588;E7EX17;B4DS13;F8VX11;F8W0K0;F8VYE9;F8VSC7;F8VP89;F8VRU1	P23588;E7EX17;B4DS13;F8VX11	16;16;12;8;6;6;6;6;3	16;16;12;8;6;6;6;6;3	16;16;12;8;6;6;6;6;3	Eukaryotic translation initiation factor 4B	EIF4B	>sp|P23588|IF4B_HUMAN Eukaryotic translation initiation factor 4B OS=Homo sapiens GN=EIF4B PE=1 SV=2;>tr|E7EX17|E7EX17_HUMAN Eukaryotic translation initiation factor 4B OS=Homo sapiens GN=EIF4B PE=2 SV=1;>tr|B4DS13|B4DS13_HUMAN Eukaryotic translation initi	9	16	16	16	13	4	13	4	13	4	34.4	34.4	34.4	69.15	611	611;616;572;360;170;185;227;275;175	4.81				17	12	6	2				33	4	1.5095e-99	0.73869	1.0449	29.78	36	0.74559	1.0547	0.0768327	30.462	32	0.70756	0.89088	0.166697
P23284	P23284	16	16	16	Peptidyl-prolyl cis-trans isomerase B	PPIB	>sp|P23284|PPIB_HUMAN Peptidyl-prolyl cis-trans isomerase B OS=Homo sapiens GN=PPIB PE=1 SV=2	1	16	16	16	5	16	5	16	5	16	58.8	58.8	58.8	23.742	216	216	7.54						10	28	30	3	5	10	66	3.1511e-94	0.81967	0.90378	13.408	74	0.78863	1.1256	0.170694	5.2205	10	0.82437	0.89785	0.155454
Q8N2K0;Q8N2K0-2;Q8N2K0-3;I3L294;Q5T712;I3L440;I3L380;I3L1V0	Q8N2K0;Q8N2K0-2;Q8N2K0-3	16;16;12;7;6;4;4;4	16;16;12;7;6;4;4;4	16;16;12;7;6;4;4;4	Monoacylglycerol lipase ABHD12	ABHD12	>sp|Q8N2K0|ABD12_HUMAN Monoacylglycerol lipase ABHD12 OS=Homo sapiens GN=ABHD12 PE=1 SV=2;>sp|Q8N2K0-2|ABD12_HUMAN Isoform 2 of Monoacylglycerol lipase ABHD12 OS=Homo sapiens GN=ABHD12;>sp|Q8N2K0-3|ABD12_HUMAN Isoform 3 of Monoacylglycerol lipase ABHD12 OS	8	16	16	16	6	12	6	12	6	12	49	49	49	45.096	398	398;404;360;159;187;105;118;194	5.59					16	16	2				12	22	1.0699e-62	0.81142	1.0091	22.812	34	0.81219	1.1771	0.235237	22.322	12	0.80524	0.90684	0.14108
Q15637-4;Q15637-6;Q15637-3;Q15637-2;Q15637;Q15637-7;B4DX42;F8WEV5;C9J792;H7C561	Q15637-4;Q15637-6;Q15637-3;Q15637-2;Q15637;Q15637-7	16;16;16;16;16;11;7;6;3;1	16;16;16;16;16;11;7;6;3;1	3;3;3;3;3;0;0;3;0;0	Splicing factor 1	SF1	>sp|Q15637-4|SF01_HUMAN Isoform 4 of Splicing factor 1 OS=Homo sapiens GN=SF1;>sp|Q15637-6|SF01_HUMAN Isoform 6 of Splicing factor 1 OS=Homo sapiens GN=SF1;>sp|Q15637-3|SF01_HUMAN Isoform 3 of Splicing factor 1 OS=Homo sapiens GN=SF1;>sp|Q15637-2|SF01_HUMA	10	16	16	3	16	6	16	6	3	0	35.4	35.4	2.9	59.711	548	548;571;623;638;639;613;433;110;62;292	4.86				30	24	10	5				59	10	3.9524e-74	0.71941	0.96752	11.438	68	0.71685	0.97685	-0.033791	10.413	59	0.77267	0.91324	0.130934
Q6NYC8;Q6NYC8-2	Q6NYC8;Q6NYC8-2	16;12	16;12	16;12	Phostensin	PPP1R18	>sp|Q6NYC8|PPR18_HUMAN Phostensin OS=Homo sapiens GN=PPP1R18 PE=1 SV=1;>sp|Q6NYC8-2|PPR18_HUMAN Isoform 2 of Phostensin OS=Homo sapiens GN=PPP1R18	2	16	16	16	16	3	16	3	16	3	34.4	34.4	34.4	67.942	613	613;377	4.45			8	23	10	4	4				45	4	2.0281e-72	0.7686	1.0314	17.288	49	0.77853	1.0408	0.0576929	17.395	45	0.74324	0.91485	0.128393
F8W7U3;E7ESD2;Q641Q2-2;Q641Q2;Q5SNT6;F5GY39;B1AP61	F8W7U3;E7ESD2;Q641Q2-2;Q641Q2;Q5SNT6;F5GY39	16;16;16;16;15;12;5	16;16;16;16;15;12;5	2;2;2;2;2;2;0	WASH complex subunit FAM21A;WASH complex subunit FAM21B	FAM21A;FAM21B	>tr|F8W7U3|F8W7U3_HUMAN WASH complex subunit FAM21A OS=Homo sapiens GN=FAM21A PE=2 SV=1;>tr|E7ESD2|E7ESD2_HUMAN WASH complex subunit FAM21A OS=Homo sapiens GN=FAM21A PE=2 SV=2;>sp|Q641Q2-2|FA21A_HUMAN Isoform 2 of WASH complex subunit FAM21A OS=Homo sapien	7	16	16	2	13	3	13	3	2	0	23.4	23.4	3.8	136.86	1253	1253;1279;1320;1341;1253;510;156	3.43		4	22	13	5						38	6	1.1612e-156	0.7931	0.96446	22.938	41	0.79324	0.96446	-0.0522067	24.444	35	0.79282	0.97069	0.0429175
O94973;O94973-2;O94973-3;E9PR62;E9PQP4;H0YEG0;H0YDE9;E9PNC4	O94973;O94973-2;O94973-3	16;16;13;5;2;2;2;1	9;9;6;2;1;1;1;1	9;9;6;2;1;1;1;1	AP-2 complex subunit alpha-2	AP2A2	>sp|O94973|AP2A2_HUMAN AP-2 complex subunit alpha-2 OS=Homo sapiens GN=AP2A2 PE=1 SV=2;>sp|O94973-2|AP2A2_HUMAN Isoform 2 of AP-2 complex subunit alpha-2 OS=Homo sapiens GN=AP2A2;>sp|O94973-3|AP2A2_HUMAN Isoform 3 of AP-2 complex subunit alpha-2 OS=Homo sa	8	16	9	9	4	15	1	9	1	9	25.6	18.2	18.2	103.96	939	939;940;656;378;90;185;185;125	3.65			8	11	1						1	19	7.8844e-103	0.83288	0.98877	13.909	20	0.70633	0.97988	-0.029323	NaN	1	0.83692	0.99132	0.0125773
Q14444;Q14444-2;E9PLA9;G3V153;E9PP31	Q14444;Q14444-2;E9PLA9;G3V153;E9PP31	16;15;11;11;9	16;15;11;11;9	16;15;11;11;9	Caprin-1	CAPRIN1	>sp|Q14444|CAPR1_HUMAN Caprin-1 OS=Homo sapiens GN=CAPRIN1 PE=1 SV=2;>sp|Q14444-2|CAPR1_HUMAN Isoform 2 of Caprin-1 OS=Homo sapiens GN=CAPRIN1;>tr|E9PLA9|E9PLA9_HUMAN Caprin-1 (Fragment) OS=Homo sapiens GN=CAPRIN1 PE=2 SV=1;>tr|G3V153|G3V153_HUMAN Caprin-1	5	16	16	16	14	5	14	5	14	5	27.5	27.5	27.5	78.365	709	709;694;186;628;178	3.55		1	16	23							28	12	1.085e-65	0.74564	0.91945	13.547	39	0.71384	0.88442	-0.177196	12.834	27	0.86838	0.99229	0.0111663
P05141;Q9H0C2	P05141	16;4	6;0	6;0	ADP/ATP translocase 2	SLC25A5	>sp|P05141|ADT2_HUMAN ADP/ATP translocase 2 OS=Homo sapiens GN=SLC25A5 PE=1 SV=7	2	16	6	6	7	15	3	6	3	6	41.6	19.5	19.5	32.852	298	298;315	4.98	4	6	6	3		9	11	4		1	19	25	1.857e-54	0.82468	1.0059	27.593	44	0.78018	1.0188	0.0268709	36.773	19	0.85546	0.99947	0.000764831
O14745;J3QRP6;B3KY21	O14745;J3QRP6;B3KY21	16;9;8	16;9;8	16;9;8	Na(+)/H(+) exchange regulatory cofactor NHE-RF1	SLC9A3R1	>sp|O14745|NHRF1_HUMAN Na(+)/H(+) exchange regulatory cofactor NHE-RF1 OS=Homo sapiens GN=SLC9A3R1 PE=1 SV=4;>tr|J3QRP6|J3QRP6_HUMAN Na(+)/H(+) exchange regulatory cofactor NHE-RF1 (Fragment) OS=Homo sapiens GN=SLC9A3R1 PE=4 SV=1;>tr|B3KY21|B3KY21_HUMAN Na	3	16	16	16	16	7	16	7	16	7	50	50	50	38.868	358	358;215;202	5.54				3	25	17	7				41	11	8.1719e-74	0.66969	0.92163	19.991	51	0.65962	0.90475	-0.144409	11.325	40	0.91373	1.0112	-0.0160684
P27348;E9PG15	P27348;E9PG15	16;8	9;4	9;4	14-3-3 protein theta	YWHAQ	>sp|P27348|1433T_HUMAN 14-3-3 protein theta OS=Homo sapiens GN=YWHAQ PE=1 SV=1;>tr|E9PG15|E9PG15_HUMAN 14-3-3 protein theta (Fragment) OS=Homo sapiens GN=YWHAQ PE=2 SV=1	2	16	9	9	4	15	1	9	1	9	51	37.6	37.6	27.764	245	245;149	6.58						12	13	1			3	23	8.6356e-159	0.90724	1.0202	10.93	26	0.67396	0.9439	-0.0832941	1.9913	3	0.92675	1.036	-0.051024
O14980;C9JKM9;H7BZC5;C9IZS4;C9JQ02;C9JV99;C9J673;C9JF49;C9IYM2;F8WF71	O14980	16;3;2;2;2;2;2;1;1;1	16;3;2;2;2;2;2;1;1;1	16;3;2;2;2;2;2;1;1;1	Exportin-1	XPO1	>sp|O14980|XPO1_HUMAN Exportin-1 OS=Homo sapiens GN=XPO1 PE=1 SV=1	10	16	16	16	0	16	0	16	0	16	19.9	19.9	19.9	123.38	1071	1071;179;72;94;95;100;132;59;62;82	3.55	1		13	18	1							33	1.4937e-118	0.92548	1.0725	20.001	33	NaN	NaN	#VALUE!	NaN	0	0.92548	1.0725	-0.100978
P54136;P54136-2;F5H3T8;E5RJM9;E5RH09	P54136;P54136-2;F5H3T8	16;14;9;4;3	16;14;9;4;3	16;14;9;4;3	Arginine--tRNA ligase, cytoplasmic	RARS	>sp|P54136|SYRC_HUMAN Arginine--tRNA ligase, cytoplasmic OS=Homo sapiens GN=RARS PE=1 SV=2;>sp|P54136-2|SYRC_HUMAN Isoform Monomeric of Arginine--tRNA ligase, cytoplasmic OS=Homo sapiens GN=RARS;>tr|F5H3T8|F5H3T8_HUMAN Arginine--tRNA ligase, cytoplasmic OS	5	16	16	16	5	16	5	16	5	16	27.9	27.9	27.9	75.378	660	660;588;454;129;113	4.57				16	18	1					8	27	1.4906e-67	0.96761	1.1168	16.245	35	0.6888	0.94735	-0.0780306	18.829	8	0.97919	1.1255	-0.170566
Q99832;Q99832-3;F5GZK5;Q99832-4;B7Z1C9;Q99832-2;F8WAM2;F8WBP8	Q99832;Q99832-3;F5GZK5;Q99832-4;B7Z1C9;Q99832-2	16;15;12;12;11;10;4;1	16;15;12;12;11;10;4;1	16;15;12;12;11;10;4;1	T-complex protein 1 subunit eta	CCT7	>sp|Q99832|TCPH_HUMAN T-complex protein 1 subunit eta OS=Homo sapiens GN=CCT7 PE=1 SV=2;>sp|Q99832-3|TCPH_HUMAN Isoform 3 of T-complex protein 1 subunit eta OS=Homo sapiens GN=CCT7;>tr|F5GZK5|F5GZK5_HUMAN T-complex protein 1 subunit eta OS=Homo sapiens GN=	8	16	16	16	5	15	5	15	5	15	35.5	35.5	35.5	59.366	543	543;499;443;456;415;339;98;83	4.9			2	22	32	15	2				19	54	1.7531e-104	0.9621	1.0907	21.569	71	0.64181	0.85636	-0.223711	19.447	17	1.0376	1.145	-0.195348
Q13492-3;Q13492-2;Q13492-5;Q13492;Q13492-4;H0YCY1;E9PJT1;E9PK13;E9PKP6;E9PI56;E9PLJ8;E5RFU0;E5RHK9;E5RFC6;E5RK51;E5RIJ5;E5RGY9;O60641-3;O60641-4;E9PDG8;O60641;F5GWN7	Q13492-3;Q13492-2;Q13492-5;Q13492;Q13492-4	16;16;16;16;14;6;2;2;2;2;2;1;1;1;1;1;1;1;1;1;1;1	16;16;16;16;14;6;2;2;2;2;2;1;1;1;1;1;1;1;1;1;1;1	11;11;11;11;9;1;2;2;2;2;2;1;1;1;1;1;1;1;1;1;1;1	Phosphatidylinositol-binding clathrin assembly protein	PICALM	>sp|Q13492-3|PICAL_HUMAN Isoform 3 of Phosphatidylinositol-binding clathrin assembly protein OS=Homo sapiens GN=PICALM;>sp|Q13492-2|PICAL_HUMAN Isoform 2 of Phosphatidylinositol-binding clathrin assembly protein OS=Homo sapiens GN=PICALM;>sp|Q13492-5|PICAL	22	16	16	11	8	11	8	11	3	9	33.4	33.4	24.9	66.392	610	610;632;645;652;551;244;48;105;148;148;185;117;120;149;151;152;582;600;877;902;907;907	4.86				14	22	4	2				19	23	1.3747e-119	0.80273	1.0062	26.008	42	0.64018	0.91114	-0.134255	17.021	19	0.96025	1.1618	-0.216362
Q16891-2;Q16891;B9A067;Q16891-3;H7C463;D6RAW4	Q16891-2;Q16891;B9A067;Q16891-3;H7C463	16;15;14;14;13;3	16;15;14;14;13;3	1;1;0;0;0;0	Mitochondrial inner membrane protein	IMMT	>sp|Q16891-2|IMMT_HUMAN Isoform 2 of Mitochondrial inner membrane protein OS=Homo sapiens GN=IMMT;>sp|Q16891|IMMT_HUMAN Mitochondrial inner membrane protein OS=Homo sapiens GN=IMMT PE=1 SV=1;>tr|B9A067|B9A067_HUMAN Mitochondrial inner membrane protein OS=H	6	16	16	1	10	12	10	12	1	1	35.5	35.5	3.3	82.624	747	747;758;711;726;613;147	4.32				27	10	1					24	14	2.937e-64	0.7885	1.0255	16.394	38	0.73707	0.9819	-0.026352	13.259	24	1.0385	1.1745	-0.232047
P40429;M0QYS1;Q6NVV1;M0QZU1	P40429;M0QYS1	16;14;5;2	16;14;5;2	16;14;5;2	60S ribosomal protein L13a	RPL13A	>sp|P40429|RL13A_HUMAN 60S ribosomal protein L13a OS=Homo sapiens GN=RPL13A PE=1 SV=2;>tr|M0QYS1|M0QYS1_HUMAN 60S ribosomal protein L13a (Fragment) OS=Homo sapiens GN=RPL13A PE=4 SV=1	4	16	16	16	13	12	13	12	13	12	48.3	48.3	48.3	23.577	203	203;207;102;46	6.27	4	3				11	31	4		2	24	31	9.8592e-55	0.95683	1.0596	18.427	53	0.65774	0.95333	-0.0689524	11.684	23	1.0518	1.1882	-0.248778
P56192;A6NC17;B3KVK7;H0YIP0;H0YHV5;H0YI94;H0YIC2;H0YHL6;H0YI27	P56192;A6NC17	16;13;7;5;3;2;1;1;1	16;13;7;5;3;2;1;1;1	16;13;7;5;3;2;1;1;1	Methionine--tRNA ligase, cytoplasmic	MARS	>sp|P56192|SYMC_HUMAN Methionine--tRNA ligase, cytoplasmic OS=Homo sapiens GN=MARS PE=1 SV=2;>tr|A6NC17|A6NC17_HUMAN Methionine--tRNA ligase, cytoplasmic OS=Homo sapiens GN=MARS PE=2 SV=3	9	16	16	16	7	12	7	12	7	12	29.2	29.2	29.2	101.11	900	900;635;546;219;233;119;58;81;124	3.77			8	22	1						11	20	2.702e-86	0.95488	1.1401	19.363	31	0.63232	0.83487	-0.260377	17.132	11	1.0241	1.2083	-0.272979
P62081;B5MCP9	P62081;B5MCP9	16;11	16;11	16;11	40S ribosomal protein S7	RPS7	>sp|P62081|RS7_HUMAN 40S ribosomal protein S7 OS=Homo sapiens GN=RPS7 PE=1 SV=1;>tr|B5MCP9|B5MCP9_HUMAN 40S ribosomal protein S7 OS=Homo sapiens GN=RPS7 PE=2 SV=1	2	16	16	16	6	16	6	16	6	16	68	68	68	22.127	194	194;187	6.59	1	1				18	34	5			8	51	6.3471e-117	1.1105	1.226	18.317	55	0.59849	0.83787	-0.255202	8.9509	8	1.1171	1.2421	-0.312781
Q14157;Q14157-5;Q14157-4;Q14157-1;Q14157-3;F8W726;Q5VU77;Q5VU81;Q5VU80;Q5VU79;Q5VU78;H0Y5H6;H7C2T8	Q14157;Q14157-5;Q14157-4;Q14157-1;Q14157-3;F8W726	16;16;15;15;15;15;6;5;5;5;5;3;2	16;16;15;15;15;15;6;5;5;5;5;3;2	16;16;15;15;15;15;6;5;5;5;5;3;2	Ubiquitin-associated protein 2-like	UBAP2L	>sp|Q14157|UBP2L_HUMAN Ubiquitin-associated protein 2-like OS=Homo sapiens GN=UBAP2L PE=1 SV=2;>sp|Q14157-5|UBP2L_HUMAN Isoform 5 of Ubiquitin-associated protein 2-like OS=Homo sapiens GN=UBAP2L;>sp|Q14157-4|UBP2L_HUMAN Isoform 4 of Ubiquitin-associated pr	13	16	16	16	13	10	13	10	13	10	23.6	23.6	23.6	114.53	1087	1087;1104;976;983;1068;1078;350;182;234;265;280;383;399	3.56			34	13	5	1	1				39	15	1.0886e-105	0.65498	0.79968	33.505	53	0.61154	0.71404	-0.485923	22.954	38	1.09	1.3077	-0.387032
P31939;E9PBU3;F5GWY2;F8WEF0;C9JLK0;H7C084;H7C1S2;H7BZU3	P31939;E9PBU3;F5GWY2	16;14;10;6;4;4;4;1	16;14;10;6;4;4;4;1	16;14;10;6;4;4;4;1	Bifunctional purine biosynthesis protein PURH;Phosphoribosylaminoimidazolecarboxamide formyltransferase;IMP cyclohydrolase	ATIC	>sp|P31939|PUR9_HUMAN Bifunctional purine biosynthesis protein PURH OS=Homo sapiens GN=ATIC PE=1 SV=3;>tr|E9PBU3|E9PBU3_HUMAN Phosphoribosylaminoimidazolecarboxamide formyltransferase OS=Homo sapiens GN=ATIC PE=2 SV=1;>tr|F5GWY2|F5GWY2_HUMAN Phosphoribosyl	8	16	16	16	11	11	11	11	11	11	31.1	31.1	31.1	64.615	592	592;591;533;84;170;200;231;107	4.82				14	26	2	2				21	23	5.5576e-91	1.1151	1.2835	35.584	43	0.53292	0.75507	-0.405318	22.558	20	1.2879	1.4341	-0.520146
B7Z254;Q15084;F8WA83;B5MCQ5;Q15084-2	B7Z254;Q15084;F8WA83;B5MCQ5;Q15084-2	16;16;16;16;16	16;16;16;16;16	16;16;16;16;16	Protein disulfide-isomerase A6	PDIA6	>tr|B7Z254|B7Z254_HUMAN Protein disulfide-isomerase A6 OS=Homo sapiens GN=PDIA6 PE=2 SV=1;>sp|Q15084|PDIA6_HUMAN Protein disulfide-isomerase A6 OS=Homo sapiens GN=PDIA6 PE=1 SV=1;>tr|F8WA83|F8WA83_HUMAN Protein disulfide-isomerase A6 OS=Homo sapiens GN=PDI	5	16	16	16	10	13	10	13	10	13	45.8	45.8	45.8	47.837	437	437;440;445;488;492	5.38			1	14	29	24	11				32	47	2.5245e-145	1.1195	1.2424	40.849	79	0.48787	0.68155	-0.553109	15.025	32	1.2862	1.4528	-0.538836
Q13435;E9PPJ0;E9PJT3;E9PJ04;H0YCG1;E9PIL8;H0YEX5	Q13435;E9PPJ0;E9PJT3;E9PJ04	16;15;8;8;7;4;4	16;15;8;8;7;4;4	16;15;8;8;7;4;4	Splicing factor 3B subunit 2	SF3B2	>sp|Q13435|SF3B2_HUMAN Splicing factor 3B subunit 2 OS=Homo sapiens GN=SF3B2 PE=1 SV=2;>tr|E9PPJ0|E9PPJ0_HUMAN Splicing factor 3B subunit 2 OS=Homo sapiens GN=SF3B2 PE=2 SV=1;>tr|E9PJT3|E9PJT3_HUMAN Splicing factor 3B subunit 2 (Fragment) OS=Homo sapiens G	7	16	16	16	8	12	8	12	8	12	22.2	22.2	22.2	100.23	895	895;878;273;354;387;81;315	3.26			24	6	1						19	12	2.5708e-48	0.58128	0.72556	45.049	31	0.53027	0.65301	-0.614823	26.522	19	1.114	1.4545	-0.540523
O94925-3;O94925;O94925-2;H7BZD1;B8ZZA8;B8ZZC5;C9JIJ6	O94925-3;O94925	16;14;5;3;3;2;1	16;14;5;3;3;2;1	16;14;5;3;3;2;1	Glutaminase kidney isoform, mitochondrial	GLS	>sp|O94925-3|GLSK_HUMAN Isoform 3 of Glutaminase kidney isoform, mitochondrial OS=Homo sapiens GN=GLS;>sp|O94925|GLSK_HUMAN Glutaminase kidney isoform, mitochondrial OS=Homo sapiens GN=GLS PE=1 SV=1	7	16	16	16	7	15	7	15	7	15	37.3	37.3	37.3	65.459	598	598;669;169;114;169;103;164	4.85			1	17	27	9	1				16	39	8.4509e-128	1.3767	1.5487	41.242	55	0.52161	0.72807	-0.457851	25.244	16	1.4704	1.6498	-0.722291
B4DIT7;P21980;F5H6P0;P21980-2;A2A299;P21980-3;A2A2A0	B4DIT7;P21980;F5H6P0;P21980-2	16;16;14;9;3;3;2	16;16;14;9;3;3;2	16;16;14;9;3;3;2	Protein-glutamine gamma-glutamyltransferase 2	TGM2	>tr|B4DIT7|B4DIT7_HUMAN Protein-glutamine gamma-glutamyltransferase 2 OS=Homo sapiens GN=TGM2 PE=2 SV=1;>sp|P21980|TGM2_HUMAN Protein-glutamine gamma-glutamyltransferase 2 OS=Homo sapiens GN=TGM2 PE=1 SV=2;>tr|F5H6P0|F5H6P0_HUMAN Protein-glutamine gamma-gl	7	16	16	16	3	16	3	16	3	16	34.2	34.2	34.2	68.648	606	606;687;627;548;281;349;160	4.15			1	27	6						7	27	6.427e-118	2.7141	3.1898	97.163	34	0.21952	0.26274	-1.92829	50.928	7	2.8286	3.2645	-1.70686
P13796;B4DUA0;Q5TBN3;Q5TBN5	P13796	16;5;5;1	13;5;3;1	13;5;3;1	Plastin-2	LCP1	>sp|P13796|PLSL_HUMAN Plastin-2 OS=Homo sapiens GN=LCP1 PE=1 SV=6	4	16	13	13	5	15	4	12	4	12	36.8	31.9	31.9	70.288	627	627;196;246;66	4.45			1	15	15						5	26	3.2536e-105	5.7466	6.5876	148.06	31	0.11661	0.14794	-2.75692	10.304	5	6.4623	7.402	-2.88792
Q9Y4E1-5;J3KP36;Q9Y4E1-3;Q9Y4E1-6;Q9Y4E1-2;Q9Y4E1;Q9Y4E1-4;Q5SRD0	Q9Y4E1-5;J3KP36;Q9Y4E1-3;Q9Y4E1-6;Q9Y4E1-2;Q9Y4E1;Q9Y4E1-4	15;15;15;15;15;15;15;7	1;1;1;1;1;1;1;1	1;1;1;1;1;1;1;1	WASH complex subunit FAM21C	FAM21C	>sp|Q9Y4E1-5|FA21C_HUMAN Isoform 5 of WASH complex subunit FAM21C OS=Homo sapiens GN=FAM21C;>tr|J3KP36|J3KP36_HUMAN WASH complex subunit FAM21C OS=Homo sapiens GN=FAM21C PE=4 SV=1;>sp|Q9Y4E1-3|FA21C_HUMAN Isoform 3 of WASH complex subunit FAM21C OS=Homo sa	8	15	1	1	12	3	1	0	1	0	21.2	1.4	1.4	136.54	1245	1245;1262;1263;1279;1310;1318;1320;308	3.25			3	1							4		2.2651e-138	0.83064	1.0662	6.9039	4	0.83064	1.0662	0.0924781	6.9039	4	NaN	NaN	#VALUE!
Q15637-5	Q15637-5	15	2	2			>sp|Q15637-5|SF01_HUMAN Isoform 5 of Splicing factor 1 OS=Homo sapiens GN=SF1	1	15	2	2	15	6	2	0	2	0	26.4	3.1	3.1	80.62	764	764	4				2							2		1.6321e-68	0.81159	0.9572	8.9334	2	0.81159	0.9572	-0.0631077	8.9334	2	NaN	NaN	#VALUE!
H7BXI1;A0FGR8-2;A0FGR8;A0FGR8-6;A0FGR8-4;F2Z3K9;A0FGR8-5	H7BXI1;A0FGR8-2;A0FGR8;A0FGR8-6;A0FGR8-4;F2Z3K9;A0FGR8-5	15;15;14;14;9;8;8	15;15;14;14;9;8;8	15;15;14;14;9;8;8	Extended synaptotagmin-2	ESYT2	>tr|H7BXI1|H7BXI1_HUMAN Extended synaptotagmin-2 (Fragment) OS=Homo sapiens GN=ESYT2 PE=2 SV=1;>sp|A0FGR8-2|ESYT2_HUMAN Isoform 2 of Extended synaptotagmin-2 OS=Homo sapiens GN=ESYT2;>sp|A0FGR8|ESYT2_HUMAN Extended synaptotagmin-2 OS=Homo sapiens GN=ESYT2	7	15	15	15	5	14	5	14	5	14	26.6	26.6	26.6	98.008	884	884;893;921;942;527;328;328	3.69	1	2	7	22	3						10	25	1.2184e-82	0.45663	0.52149	64.689	34	1.3074	1.6501	0.722553	21.294	9	0.42234	0.49647	1.01022
B7ZKM0;Q15020;F8VV04;Q15020-2;F8W667;F8VVK9;F8VZM2;Q15020-3;H0YHU8	B7ZKM0;Q15020;F8VV04	15;15;10;5;4;2;2;1;1	15;15;10;5;4;2;2;1;1	15;15;10;5;4;2;2;1;1	Squamous cell carcinoma antigen recognized by T-cells 3	SART3	>tr|B7ZKM0|B7ZKM0_HUMAN SART3 protein OS=Homo sapiens GN=SART3 PE=2 SV=1;>sp|Q15020|SART3_HUMAN Squamous cell carcinoma antigen recognized by T-cells 3 OS=Homo sapiens GN=SART3 PE=1 SV=1;>tr|F8VV04|F8VV04_HUMAN Squamous cell carcinoma antigen recognized by	9	15	15	15	7	10	7	10	7	10	20.4	20.4	20.4	105.58	927	927;963;771;364;305;111;156;129;144	3.46			18	8	1	1					18	10	1.3523e-63	0.96584	1.3356	46.281	28	1.1287	1.4392	0.525267	12.377	18	0.45553	0.56097	0.834004
P42167;G5E972;P42167-2;H0YJH7	P42167;G5E972;P42167-2	15;13;12;6	15;13;12;6	4;2;1;2	Lamina-associated polypeptide 2, isoforms beta/gamma;Thymopoietin;Thymopentin	TMPO	>sp|P42167|LAP2B_HUMAN Lamina-associated polypeptide 2, isoforms beta/gamma OS=Homo sapiens GN=TMPO PE=1 SV=2;>tr|G5E972|G5E972_HUMAN Thymopentin OS=Homo sapiens GN=TMPO PE=2 SV=1;>sp|P42167-2|LAP2B_HUMAN Isoform Gamma of Lamina-associated polypeptide 2, i	4	15	15	4	14	8	14	8	3	2	43.2	43.2	13.7	50.67	454	454;414;345;237	5.21				19	25	18	8				54	16	6.9658e-86	0.96082	1.3108	36.076	70	1.0621	1.469	0.554834	19.502	54	0.54798	0.62845	0.67013
P29966	P29966	15	15	14	Myristoylated alanine-rich C-kinase substrate	MARCKS	>sp|P29966|MARCS_HUMAN Myristoylated alanine-rich C-kinase substrate OS=Homo sapiens GN=MARCKS PE=1 SV=4	1	15	15	14	15	5	15	5	14	5	55.7	55.7	55.7	31.554	332	332	4.38		4	18	26	20	11	4	1			71	13	2.632e-165	0.99031	1.22	29.717	84	1.0211	1.2702	0.345056	19.105	71	0.52755	0.66883	0.580289
O14776-2;O14776;G3V220	O14776-2;O14776;G3V220	15;15;14	15;15;14	15;15;14	Transcription elongation regulator 1	TCERG1	>sp|O14776-2|TCRG1_HUMAN Isoform 2 of Transcription elongation regulator 1 OS=Homo sapiens GN=TCERG1;>sp|O14776|TCRG1_HUMAN Transcription elongation regulator 1 OS=Homo sapiens GN=TCERG1 PE=1 SV=2;>tr|G3V220|G3V220_HUMAN Transcription elongation regulator	3	15	15	15	9	7	9	7	9	7	14.4	14.4	14.4	121.69	1077	1077;1098;1032	3.2			17	2	1						13	7	1.0598e-38	0.7713	0.94611	14.51	20	0.81859	1.0017	0.0024505	8.8255	13	0.61548	0.76862	0.379658
O43809;H3BND3;H3BV41	O43809	15;7;4	15;7;4	15;7;4	Cleavage and polyadenylation specificity factor subunit 5	NUDT21	>sp|O43809|CPSF5_HUMAN Cleavage and polyadenylation specificity factor subunit 5 OS=Homo sapiens GN=NUDT21 PE=1 SV=1	3	15	15	15	7	11	7	11	7	11	65.6	65.6	65.6	26.227	227	227;150;71	6.62						12	20				8	24	4.9222e-61	0.71937	0.82252	23.174	32	0.81863	1.206	0.27023	8.5787	8	0.70159	0.77549	0.36682
P48735;B4DFL2;B4DSZ6;H0YL11;C9J4N6;O75874	P48735;B4DFL2;B4DSZ6;H0YL11	15;14;10;9;1;1	15;14;10;9;1;1	15;14;10;9;1;1	Isocitrate dehydrogenase [NADP], mitochondrial;Isocitrate dehydrogenase [NADP]	IDH2	>sp|P48735|IDHP_HUMAN Isocitrate dehydrogenase [NADP], mitochondrial OS=Homo sapiens GN=IDH2 PE=1 SV=2;>tr|B4DFL2|B4DFL2_HUMAN Isocitrate dehydrogenase [NADP] OS=Homo sapiens GN=IDH2 PE=2 SV=1;>tr|B4DSZ6|B4DSZ6_HUMAN Isocitrate dehydrogenase [NADP], mitoch	6	15	15	15	8	15	8	15	8	15	37.8	37.8	37.8	50.909	452	452;400;322;312;157;414	5.67					26	29	6				13	48	3.6041e-100	0.73364	0.79145	21.757	60	0.86778	1.2032	0.266876	7.8767	12	0.70464	0.7788	0.360675
O75165;H0Y8Q2	O75165	15;1	15;1	15;1	DnaJ homolog subfamily C member 13	DNAJC13	>sp|O75165|DJC13_HUMAN DnaJ homolog subfamily C member 13 OS=Homo sapiens GN=DNAJC13 PE=1 SV=5	2	15	15	15	0	15	0	15	0	15	10.5	10.5	10.5	254.41	2243	2243;173	2.59		15	11				1					27	6.9023e-83	0.64754	0.8202	23.129	27	NaN	NaN	#VALUE!	NaN	0	0.64754	0.8202	0.285952
P43121;P43121-2	P43121;P43121-2	15;8	15;8	15;8	Cell surface glycoprotein MUC18	MCAM	>sp|P43121|MUC18_HUMAN Cell surface glycoprotein MUC18 OS=Homo sapiens GN=MCAM PE=1 SV=2;>sp|P43121-2|MUC18_HUMAN Isoform 2 of Cell surface glycoprotein MUC18 OS=Homo sapiens GN=MCAM	2	15	15	15	11	10	11	10	11	10	28.8	28.8	28.8	71.607	646	646;527	4.89			10	21	13	9	8	3			36	28	3.4766e-101	0.7965	0.96332	41.131	64	0.88232	1.1961	0.258338	36.344	36	0.71962	0.82084	0.284827
P37837;F2Z393;E9PM01;E9PKI8	P37837;F2Z393	15;12;1;1	15;12;1;1	15;12;1;1	Transaldolase	TALDO1	>sp|P37837|TALDO_HUMAN Transaldolase OS=Homo sapiens GN=TALDO1 PE=1 SV=2;>tr|F2Z393|F2Z393_HUMAN Transaldolase OS=Homo sapiens GN=TALDO1 PE=2 SV=1	4	15	15	15	6	13	6	13	6	13	40.4	40.4	40.4	37.54	337	337;318;50;93	6					15	28	15				16	42	7.1147e-79	0.77493	0.86247	18.176	58	0.83585	1.1399	0.188907	10.082	16	0.76241	0.82144	0.283773
Q9NYF8-2;Q9NYF8;Q9NYF8-3;E9PK91;E9PK09;Q9NYF8-4;E9PQN2;E9PKI6;E9PJA7;H0YF00;B0AZU3;H0YF14;H0YF63	Q9NYF8-2;Q9NYF8;Q9NYF8-3;E9PK91;E9PK09;Q9NYF8-4;E9PQN2;E9PKI6;E9PJA7	15;15;14;14;13;13;13;13;9;2;2;2;1	14;14;14;14;13;12;13;13;9;2;1;1;1	14;14;14;14;13;12;13;13;9;2;1;1;1	Bcl-2-associated transcription factor 1	BCLAF1	>sp|Q9NYF8-2|BCLF1_HUMAN Isoform 2 of Bcl-2-associated transcription factor 1 OS=Homo sapiens GN=BCLAF1;>sp|Q9NYF8|BCLF1_HUMAN Bcl-2-associated transcription factor 1 OS=Homo sapiens GN=BCLAF1 PE=1 SV=2;>sp|Q9NYF8-3|BCLF1_HUMAN Isoform 3 of Bcl-2-associate	13	15	14	14	10	9	9	8	9	8	20.3	19.1	19.1	105.95	918	918;920;869;871;726;747;750;752;467;118;138;187;126	3.39			19	7	2						17	11	2.6901e-41	0.799	0.9597	14.72	28	0.82162	0.9789	-0.0307666	15.85	17	0.72811	0.83949	0.252415
P00505;E7ERW2	P00505;E7ERW2	15;13	15;13	15;13	Aspartate aminotransferase, mitochondrial;Aspartate aminotransferase	GOT2	>sp|P00505|AATM_HUMAN Aspartate aminotransferase, mitochondrial OS=Homo sapiens GN=GOT2 PE=1 SV=3;>tr|E7ERW2|E7ERW2_HUMAN Aspartate aminotransferase OS=Homo sapiens GN=GOT2 PE=2 SV=1	2	15	15	15	6	13	6	13	6	13	34.7	34.7	34.7	47.517	430	430;387	5.8					16	21	7				10	34	2.4142e-72	0.79252	0.92072	15.566	44	0.77301	1.0586	0.0821576	15.166	10	0.79252	0.89698	0.156852
Q99459	Q99459	15	15	15	Cell division cycle 5-like protein	CDC5L	>sp|Q99459|CDC5L_HUMAN Cell division cycle 5-like protein OS=Homo sapiens GN=CDC5L PE=1 SV=2	1	15	15	15	13	3	13	3	13	3	25.1	25.1	25.1	92.25	802	802	4.13			2	18	1	2					19	4	3.808e-55	0.71436	0.86297	13.966	23	0.67458	0.84312	-0.24619	14.462	19	0.80898	0.9203	0.119824
P27695;G3V3M6;G3V5Q1;G3V3C7;G3V5D9;G3V5M0;G3V359;H7C4A8;G3V3Y6;G3V2D9	P27695;G3V3M6;G3V5Q1;G3V3C7	15;12;11;10;7;7;7;4;2;2	15;12;11;10;7;7;7;4;2;2	15;12;11;10;7;7;7;4;2;2	DNA-(apurinic or apyrimidinic site) lyase;DNA-(apurinic or apyrimidinic site) lyase, mitochondrial	APEX1	>sp|P27695|APEX1_HUMAN DNA-(apurinic or apyrimidinic site) lyase OS=Homo sapiens GN=APEX1 PE=1 SV=2;>tr|G3V3M6|G3V3M6_HUMAN DNA-(apurinic or apyrimidinic site) lyase (Fragment) OS=Homo sapiens GN=APEX1 PE=2 SV=1;>tr|G3V5Q1|G3V5Q1_HUMAN DNA-(apurinic or apy	10	15	15	15	7	11	7	11	7	11	58.2	58.2	58.2	35.554	318	318;263;242;174;108;162;172;150;42;49	6.13					7	20	12				16	23	5.3544e-111	0.75264	0.93812	13.117	38	0.67314	0.97022	-0.0436162	7.1951	16	0.80506	0.92412	0.113848
A5YKK6;A5YKK6-2;A5YKK6-3;A5YKK6-4;B5MDN3;H3BMZ2;H3BNB1;H3BR89;H3BMH0;H3BUY8;H3BPF1;H3BT18;H3BU44;H3BVC9	A5YKK6;A5YKK6-2;A5YKK6-3;A5YKK6-4;B5MDN3	15;13;11;10;8;3;2;2;2;1;1;1;1;1	15;13;11;10;8;3;2;2;2;1;1;1;1;1	15;13;11;10;8;3;2;2;2;1;1;1;1;1	CCR4-NOT transcription complex subunit 1	CNOT1	>sp|A5YKK6|CNOT1_HUMAN CCR4-NOT transcription complex subunit 1 OS=Homo sapiens GN=CNOT1 PE=1 SV=2;>sp|A5YKK6-2|CNOT1_HUMAN Isoform 2 of CCR4-NOT transcription complex subunit 1 OS=Homo sapiens GN=CNOT1;>sp|A5YKK6-3|CNOT1_HUMAN Isoform 3 of CCR4-NOT transc	14	15	15	15	2	13	2	13	2	13	9	9	9	266.94	2376	2376;2371;2150;1551;1227;439;185;193;277;25;26;62;96;241	2.45	1	15	12	1							5	24	1.0652e-98	0.79561	0.94469	12.297	29	0.88991	0.90123	-0.150033	22.894	5	0.77241	0.95533	0.0659289
P46379-2;B0UX83;P46379;P46379-3;P46379-5;P46379-4;H0Y710;H0Y4L1;F6S6P2;F6UR09;F6U1F2;F6XTU0;F6RG75;F6WML8;F6VEM6;F6X9W3;F6U341	P46379-2;B0UX83;P46379;P46379-3;P46379-5;P46379-4	15;15;15;15;11;9;6;4;3;1;1;1;1;1;1;1;1	15;15;15;15;11;9;6;4;3;1;1;1;1;1;1;1;1	15;15;15;15;11;9;6;4;3;1;1;1;1;1;1;1;1	Large proline-rich protein BAG6	BAG6	>sp|P46379-2|BAG6_HUMAN Isoform 2 of Large proline-rich protein BAG6 OS=Homo sapiens GN=BAG6;>tr|B0UX83|B0UX83_HUMAN HLA-B associated transcript 3, isoform CRA_a OS=Homo sapiens GN=BAG6 PE=2 SV=1;>sp|P46379|BAG6_HUMAN Large proline-rich protein BAG6 OS=Hom	17	15	15	15	8	8	8	8	8	8	19.3	19.3	19.3	118.69	1126	1126;1126;1132;1162;1077;903;226;136;515;197;206;215;233;244;258;259;262	3.13		1	18	4							14	9	1.9349e-84	0.72237	0.96719	23.275	23	0.70358	0.91807	-0.123324	29.644	14	0.8406	0.98824	0.0170666
Q99623;J3KPX7;F5GY37;Q99623-2;B4DW05;F5GWA7;F5H3X6;F5H0C5;F5H2D2;F5H0S4	Q99623;J3KPX7;F5GY37;Q99623-2;B4DW05;F5GWA7;F5H3X6	15;15;14;13;12;11;9;4;3;3	15;15;14;13;12;11;9;4;3;3	15;15;14;13;12;11;9;4;3;3	Prohibitin-2	PHB2	>sp|Q99623|PHB2_HUMAN Prohibitin-2 OS=Homo sapiens GN=PHB2 PE=1 SV=2;>tr|J3KPX7|J3KPX7_HUMAN Prohibitin-2 OS=Homo sapiens GN=PHB2 PE=4 SV=1;>tr|F5GY37|F5GY37_HUMAN Prohibitin-2 OS=Homo sapiens GN=PHB2 PE=2 SV=1;>sp|Q99623-2|PHB2_HUMAN Isoform 2 of Prohibit	10	15	15	15	3	15	3	15	3	15	61.5	61.5	61.5	33.296	299	299;299;267;261;213;261;220;112;87;139	6.14					9	19	15				3	40	1.0613e-110	0.86859	0.99667	25.915	43	0.70411	0.95211	-0.0707998	12.646	3	0.88084	0.99675	0.00469639
P34897-3;P34897;P34897-2;B4DLV4;H0YIZ0;G3V2Y4;G3V5L0;G3V4W5;G3V540;G3V241;G3V3Y8;G3V4T0;G3V4X0;G3V2W0;G3V2E4;G3V2D2;P34896-3	P34897-3;P34897;P34897-2;B4DLV4;H0YIZ0;G3V2Y4	15;15;14;12;9;8;5;4;3;2;2;2;2;2;2;1;1	15;15;14;12;9;8;5;4;3;2;2;2;2;2;2;1;1	14;14;13;12;9;7;4;3;2;2;2;2;2;2;2;0;0	Serine hydroxymethyltransferase, mitochondrial;Serine hydroxymethyltransferase	SHMT2	>sp|P34897-3|GLYM_HUMAN Isoform 3 of Serine hydroxymethyltransferase, mitochondrial OS=Homo sapiens GN=SHMT2;>sp|P34897|GLYM_HUMAN Serine hydroxymethyltransferase, mitochondrial OS=Homo sapiens GN=SHMT2 PE=1 SV=3;>sp|P34897-2|GLYM_HUMAN Isoform 2 of Serine	17	15	15	14	5	13	5	13	5	12	42.2	42.2	39.3	53.454	483	483;504;494;408;264;234;215;237;192;142;147;149;159;160;171;52;403	5.06				5	21	7					8	25	2.1363e-84	0.8849	1.0058	18.521	30	0.73302	0.99876	-0.00179005	32.105	6	0.90209	1.0082	-0.0117819
P25205;B4DWW4;J3KQ69;Q7Z6P5	P25205;B4DWW4;J3KQ69	15;14;11;4	15;14;11;4	15;14;11;4	DNA replication licensing factor MCM3	MCM3	>sp|P25205|MCM3_HUMAN DNA replication licensing factor MCM3 OS=Homo sapiens GN=MCM3 PE=1 SV=3;>tr|B4DWW4|B4DWW4_HUMAN DNA replication licensing factor MCM3 OS=Homo sapiens GN=MCM3 PE=2 SV=1;>tr|J3KQ69|J3KQ69_HUMAN DNA replication licensing factor MCM3 OS=H	4	15	15	15	5	12	5	12	5	12	20.2	20.2	20.2	90.98	808	808;853;762;328	3.68			11	19	1						7	24	1.1717e-56	0.84698	1.0113	20.304	31	0.79775	1.0022	0.00317044	20.072	7	0.86542	1.0212	-0.0302654
J3QR09;J3KTE4;P84098;J3QL15	J3QR09;J3KTE4;P84098;J3QL15	15;15;15;8	15;15;15;8	15;15;15;8	Ribosomal protein L19;60S ribosomal protein L19	RPL19	>tr|J3QR09|J3QR09_HUMAN Ribosomal protein L19 OS=Homo sapiens GN=RPL19 PE=3 SV=1;>tr|J3KTE4|J3KTE4_HUMAN Ribosomal protein L19 OS=Homo sapiens GN=RPL19 PE=3 SV=1;>sp|P84098|RL19_HUMAN 60S ribosomal protein L19 OS=Homo sapiens GN=RPL19 PE=1 SV=1;>tr|J3QL15|	4	15	15	15	12	11	12	11	12	11	41.5	41.5	41.5	23.134	193	193;194;196;128	6.67					4	19	33	2	1	1	26	34	3.2319e-110	0.83096	0.98502	25.524	59	0.57802	0.85349	-0.228554	24.507	26	1.042	1.1406	-0.189793
P26583;D6R9A6	P26583;D6R9A6	15;10	13;9	13;9	High mobility group protein B2	HMGB2	>sp|P26583|HMGB2_HUMAN High mobility group protein B2 OS=Homo sapiens GN=HMGB2 PE=1 SV=2;>tr|D6R9A6|D6R9A6_HUMAN High mobility group protein B2 (Fragment) OS=Homo sapiens GN=HMGB2 PE=2 SV=1	2	15	13	13	14	10	12	9	12	9	39.7	32.1	32.1	24.033	209	209;134	6.81					1	12	37	4			30	24	9.2312e-51	0.67808	0.95393	21.277	51	0.62315	0.8871	-0.172831	17.724	28	1.0525	1.1413	-0.190678
P09651-2;P09651-3;F8W6I7;P09651;F8VZ49;F8VTQ5;Q32P51;F8W646;H0YH80;F8VYN5	P09651-2;P09651-3;F8W6I7;P09651;F8VZ49;F8VTQ5;Q32P51	15;14;14;14;9;8;8;7;7;5	15;14;14;14;9;8;8;7;7;5	15;14;14;14;9;8;8;7;7;5	Heterogeneous nuclear ribonucleoprotein A1;Heterogeneous nuclear ribonucleoprotein A1-like 2	HNRNPA1;HNRNPA1L2	>sp|P09651-2|ROA1_HUMAN Isoform A1-A of Heterogeneous nuclear ribonucleoprotein A1 OS=Homo sapiens GN=HNRNPA1;>sp|P09651-3|ROA1_HUMAN Isoform 2 of Heterogeneous nuclear ribonucleoprotein A1 OS=Homo sapiens GN=HNRNPA1;>tr|F8W6I7|F8W6I7_HUMAN Heterogeneous n	10	15	15	15	6	14	6	14	6	14	56.6	56.6	56.6	34.196	320	320;267;320;372;231;145;320;156;191;113	6.19				1	9	27	18	2			20	37	3.2742e-104	0.97984	1.16	23.64	55	0.73365	1.0686	0.0957219	29.176	20	1.0659	1.1754	-0.233152
P42765;K7EME0;K7EJ68	P42765;K7EME0	15;10;1	15;10;1	15;10;1	3-ketoacyl-CoA thiolase, mitochondrial	ACAA2	>sp|P42765|THIM_HUMAN 3-ketoacyl-CoA thiolase, mitochondrial OS=Homo sapiens GN=ACAA2 PE=1 SV=2;>tr|K7EME0|K7EME0_HUMAN 3-ketoacyl-CoA thiolase, mitochondrial OS=Homo sapiens GN=ACAA2 PE=3 SV=1	3	15	15	15	12	8	12	8	12	8	55.2	55.2	55.2	41.924	397	397;342;124	5.76					12	23	3				19	19	2.9205e-112	0.76581	1.0353	21.918	38	0.62915	0.84153	-0.248913	12.118	19	1.0646	1.1808	-0.239765
Q05639	Q05639	15	1	1	Elongation factor 1-alpha 2	EEF1A2	>sp|Q05639|EF1A2_HUMAN Elongation factor 1-alpha 2 OS=Homo sapiens GN=EEF1A2 PE=1 SV=1	1	15	1	1	7	13	0	1	0	1	37.4	5.2	5.2	50.47	463	463	5.5					1	1						2	2.9053e-65	0.98989	1.1823	17.275	2	NaN	NaN	#VALUE!	NaN	0	0.98989	1.1823	-0.241596
O43242;B4DT72;F5H8K4;H0YGV8	O43242	15;7;1;1	15;7;1;1	15;7;1;1	26S proteasome non-ATPase regulatory subunit 3	PSMD3	>sp|O43242|PSMD3_HUMAN 26S proteasome non-ATPase regulatory subunit 3 OS=Homo sapiens GN=PSMD3 PE=1 SV=2	4	15	15	15	7	12	7	12	7	12	37.3	37.3	37.3	60.977	534	534;356;86;117	4.79				10	21	3					8	26	1.9314e-92	1.0203	1.1532	20.317	34	0.6107	0.84478	-0.243352	7.0808	8	1.0539	1.214	-0.279768
K7EKE6;K7EJE8;Q8N8K8;P36776;F5GZ27;K7ER27;K7EQF8;K7ER56;K7ERR6	K7EKE6;K7EJE8;Q8N8K8;P36776;F5GZ27	15;14;14;14;12;6;2;2;1	15;14;14;14;12;6;2;2;1	15;14;14;14;12;6;2;2;1	Lon protease homolog, mitochondrial	LONP1	>tr|K7EKE6|K7EKE6_HUMAN Lon protease homolog, mitochondrial OS=Homo sapiens GN=LONP1 PE=3 SV=1;>tr|K7EJE8|K7EJE8_HUMAN Lon protease homolog, mitochondrial OS=Homo sapiens GN=LONP1 PE=3 SV=1;>tr|Q8N8K8|Q8N8K8_HUMAN Lon protease homolog, mitochondrial OS=Hom	9	15	15	15	1	14	1	14	1	14	30.5	30.5	30.5	95.179	845	845;829;895;959;763;242;185;210;264	3.52			14	15							1	28	3.6526e-100	1.0834	1.2432	20.012	29	0.50086	0.68687	-0.541891	NaN	1	1.0857	1.2458	-0.317072
O15144;H7C3F9;G5E9S7;C9JTV5;G5E9J0	O15144	15;6;2;2;2	15;6;2;2;2	15;6;2;2;2	Actin-related protein 2/3 complex subunit 2	ARPC2	>sp|O15144|ARPC2_HUMAN Actin-related protein 2/3 complex subunit 2 OS=Homo sapiens GN=ARPC2 PE=1 SV=1	5	15	15	15	1	14	1	14	1	14	49.7	49.7	49.7	34.333	300	300;165;38;90;91	6.29					3	21	14				1	37	3.0428e-119	1.1239	1.2685	43.756	36	0.73403	1.1104	0.151079	NaN	1	1.1266	1.2694	-0.344147
O43143;B0V0F8;O60231;F5H658;Q14562	O43143	15;1;1;1;1	15;1;1;1;1	15;1;1;1;1	Putative pre-mRNA-splicing factor ATP-dependent RNA helicase DHX15	DHX15	>sp|O43143|DHX15_HUMAN Putative pre-mRNA-splicing factor ATP-dependent RNA helicase DHX15 OS=Homo sapiens GN=DHX15 PE=1 SV=2	5	15	15	15	3	13	3	13	3	13	21.1	21.1	21.1	90.932	795	795;669;1041;1181;1220	4.19			3	22	4	1	1				6	25	3.9486e-71	1.0579	1.2367	19.784	27	0.5795	0.82095	-0.284634	9.8356	5	1.1043	1.2775	-0.353323
P62753;A2A3R5;A2A3R7	P62753;A2A3R5	15;11;5	15;11;5	15;11;5	40S ribosomal protein S6	RPS6	>sp|P62753|RS6_HUMAN 40S ribosomal protein S6 OS=Homo sapiens GN=RPS6 PE=1 SV=1;>tr|A2A3R5|A2A3R5_HUMAN 40S ribosomal protein S6 OS=Homo sapiens GN=RPS6 PE=2 SV=1	3	15	15	15	13	10	13	10	13	10	39.8	39.8	39.8	28.68	249	249;218;91	6.52					3	22	27	2			28	26	7.9993e-64	0.69441	0.95136	28.028	54	0.53767	0.77529	-0.367192	9.9443	28	1.1609	1.2844	-0.361095
P61160;P61160-2;F5H6T1	P61160;P61160-2;F5H6T1	15;13;8	15;13;8	15;13;8	Actin-related protein 2	ACTR2	>sp|P61160|ARP2_HUMAN Actin-related protein 2 OS=Homo sapiens GN=ACTR2 PE=1 SV=1;>sp|P61160-2|ARP2_HUMAN Isoform 2 of Actin-related protein 2 OS=Homo sapiens GN=ACTR2;>tr|F5H6T1|F5H6T1_HUMAN Actin-related protein 2 OS=Homo sapiens GN=ACTR2 PE=2 SV=1	3	15	15	15	4	12	4	12	4	12	43.9	43.9	43.9	44.76	394	394;399;305	5.83					14	20	7				4	37	1.9562e-133	1.166	1.2994	18.356	40	0.81205	1.1406	0.189793	22.655	3	1.1788	1.3045	-0.383497
P06737-2;E9PK47;P06737;E9PMM6	P06737-2;E9PK47;P06737	15;15;15;7	10;10;10;3	10;10;10;3	Phosphorylase;Glycogen phosphorylase, liver form	PYGL	>sp|P06737-2|PYGL_HUMAN Isoform 2 of Glycogen phosphorylase, liver form OS=Homo sapiens GN=PYGL;>tr|E9PK47|E9PK47_HUMAN Phosphorylase OS=Homo sapiens GN=PYGL PE=2 SV=1;>sp|P06737|PYGL_HUMAN Glycogen phosphorylase, liver form OS=Homo sapiens GN=PYGL PE=1 SV	4	15	10	10	0	15	0	10	0	10	24.2	17.7	17.7	93.133	813	813;819;847;306	3.77			3	10								13	2.6451e-59	1.2285	1.4153	10.849	13	NaN	NaN	#VALUE!	NaN	0	1.2285	1.4153	-0.501108
E9PGF5;E9PF55;Q9HBL0;Q59G71;E7ERH1	E9PGF5;E9PF55;Q9HBL0	15;14;14;7;2	15;14;14;7;2	15;14;14;7;2	Tensin-1	TNS1	>tr|E9PGF5|E9PGF5_HUMAN Tensin-1 OS=Homo sapiens GN=TNS1 PE=2 SV=1;>tr|E9PF55|E9PF55_HUMAN Tensin-1 OS=Homo sapiens GN=TNS1 PE=2 SV=1;>sp|Q9HBL0|TENS1_HUMAN Tensin-1 OS=Homo sapiens GN=TNS1 PE=1 SV=2	5	15	15	15	15	1	15	1	15	1	16.9	16.9	16.9	183.22	1714	1714;1721;1735;873;780	3.03		5	20	6							30	1	6.3576e-48	0.23002	0.2906	50.484	31	0.22934	0.28873	-1.79221	43.068	30	1.2293	1.4269	-0.512884
P09936;D6RE83;D6R956;D6R974;D6RF53	P09936;D6RE83;D6R956;D6R974	15;13;13;11;2	15;13;13;11;2	15;13;13;11;2	Ubiquitin carboxyl-terminal hydrolase isozyme L1	UCHL1	>sp|P09936|UCHL1_HUMAN Ubiquitin carboxyl-terminal hydrolase isozyme L1 OS=Homo sapiens GN=UCHL1 PE=1 SV=2;>tr|D6RE83|D6RE83_HUMAN Ubiquitin carboxyl-terminal hydrolase isozyme L1 OS=Homo sapiens GN=UCHL1 PE=2 SV=1;>tr|D6R956|D6R956_HUMAN Ubiquitin carboxy	5	15	15	15	11	13	11	13	11	13	70.4	70.4	70.4	24.824	223	223;207;241;156;58	6.72						20	38	3			18	43	9.7175e-93	1.2851	1.4008	38.654	61	0.49907	0.69364	-0.527741	10.203	18	1.353	1.4357	-0.521754
P22626;P22626-2	P22626;P22626-2	15;14	15;14	15;14	Heterogeneous nuclear ribonucleoproteins A2/B1	HNRNPA2B1	>sp|P22626|ROA2_HUMAN Heterogeneous nuclear ribonucleoproteins A2/B1 OS=Homo sapiens GN=HNRNPA2B1 PE=1 SV=2;>sp|P22626-2|ROA2_HUMAN Isoform A2 of Heterogeneous nuclear ribonucleoproteins A2/B1 OS=Homo sapiens GN=HNRNPA2B1	2	15	15	15	11	10	11	10	11	10	56.7	56.7	56.7	37.429	353	353;341	6.36					5	27	23	1			30	26	4.3064e-104	0.75145	1.0488	24.271	56	0.64868	0.91598	-0.126612	11.957	30	1.2443	1.4362	-0.522257
P04179;B3KUK2;P04179-2;F5H4R2;F5GYZ5;F5H3C5;G8JLJ2;B4E3K9;G5E9P6;F5GXZ9	P04179;B3KUK2;P04179-2;F5H4R2;F5GYZ5;F5H3C5;G8JLJ2;B4E3K9	15;14;13;12;12;11;8;8;4;4	15;14;13;12;12;11;8;8;4;4	15;14;13;12;12;11;8;8;4;4	Superoxide dismutase [Mn], mitochondrial;Superoxide dismutase	SOD2	>sp|P04179|SODM_HUMAN Superoxide dismutase [Mn], mitochondrial OS=Homo sapiens GN=SOD2 PE=1 SV=2;>tr|B3KUK2|B3KUK2_HUMAN Superoxide dismutase OS=Homo sapiens GN=SOD2 PE=2 SV=1;>sp|P04179-2|SODM_HUMAN Isoform 2 of Superoxide dismutase [Mn], mitochondrial OS	10	15	15	15	1	15	1	15	1	15	85.1	85.1	85.1	24.722	222	222;176;183;183;190;111;61;162;140;141	6.8						18	24			3	1	44	4.018e-144	4.4097	4.6577	46.411	45	0.20955	0.27887	-1.84234	NaN	1	4.4157	4.6678	-2.22274
P08195-2;P08195-3;F5GZS6;P08195;J3KPF3;P08195-4;F5GZI0;H0YFS2;F5H867;F5H0E2;F5GZR9;H0YFX4	P08195-2;P08195-3;F5GZS6;P08195;J3KPF3;P08195-4	14;14;14;14;14;14;5;5;4;3;2;1	14;14;14;14;14;14;5;5;4;3;2;1	14;14;14;14;14;14;5;5;4;3;2;1	4F2 cell-surface antigen heavy chain	SLC3A2	>sp|P08195-2|4F2_HUMAN Isoform 2 of 4F2 cell-surface antigen heavy chain OS=Homo sapiens GN=SLC3A2;>sp|P08195-3|4F2_HUMAN Isoform 3 of 4F2 cell-surface antigen heavy chain OS=Homo sapiens GN=SLC3A2;>tr|F5GZS6|F5GZS6_HUMAN 4F2 cell-surface antigen heavy cha	12	14	14	14	3	13	3	13	3	13	39.1	39.1	39.1	57.944	529	529;568;599;630;631;661;175;247;135;145;47;122	4.04			3	21	4						8	20	8.623e-69	0.26592	0.33106	102.56	28	1.5773	2.0812	1.05742	48.83	8	0.24225	0.2944	1.76415
Q9Y2J2-2;Q9Y2J2;F5GX05;Q9Y2J2-3;E7EUF8;F5H7W5;J3QS83;J3KT37	Q9Y2J2-2;Q9Y2J2;F5GX05;Q9Y2J2-3;E7EUF8;F5H7W5	14;12;11;8;7;7;2;1	11;9;8;5;7;7;2;0	11;9;8;5;7;7;2;0	Band 4.1-like protein 3	EPB41L3	>sp|Q9Y2J2-2|E41L3_HUMAN Isoform B of Band 4.1-like protein 3 OS=Homo sapiens GN=EPB41L3;>sp|Q9Y2J2|E41L3_HUMAN Band 4.1-like protein 3 OS=Homo sapiens GN=EPB41L3 PE=1 SV=2;>tr|F5GX05|F5GX05_HUMAN Band 4.1-like protein 3 OS=Homo sapiens GN=EPB41L3 PE=2 SV=	8	14	11	11	3	12	3	9	3	9	22	19	19	96.513	865	865;1087;883;612;384;392;111;147	3.35			13	7							6	14	1.1212e-65	0.57793	0.7068	38.246	20	1.1021	1.3728	0.457121	5.1788	6	0.52705	0.63995	0.643969
G5EA31;P53992;E7EP00;B4DZT4	G5EA31;P53992;E7EP00	14;14;13;2	14;14;13;2	14;14;13;2	Protein transport protein Sec24C	SEC24C	>tr|G5EA31|G5EA31_HUMAN Protein transport protein Sec24C OS=Homo sapiens GN=SEC24C PE=2 SV=1;>sp|P53992|SC24C_HUMAN Protein transport protein Sec24C OS=Homo sapiens GN=SEC24C PE=1 SV=3;>tr|E7EP00|E7EP00_HUMAN Protein transport protein Sec24C OS=Homo sapien	4	14	14	14	5	11	5	11	5	11	20.4	20.4	20.4	111.98	1042	1042;1094;975;342	3.53			19	15	2						14	22	3.9255e-78	0.72099	0.84647	37.407	36	0.97214	1.2183	0.284869	10.659	14	0.601	0.6899	0.535541
Q9UJ70;Q9UJ70-2;H7C3G9;C9JEV6;H7C1L7;H0YEB7;E9PPU6;H0YF44;H0YC94	Q9UJ70;Q9UJ70-2;H7C3G9;C9JEV6	14;13;12;11;5;5;4;3;3	14;13;12;11;5;5;4;3;3	14;13;12;11;5;5;4;3;3	N-acetyl-D-glucosamine kinase	NAGK	>sp|Q9UJ70|NAGK_HUMAN N-acetyl-D-glucosamine kinase OS=Homo sapiens GN=NAGK PE=1 SV=4;>sp|Q9UJ70-2|NAGK_HUMAN Isoform 2 of N-acetyl-D-glucosamine kinase OS=Homo sapiens GN=NAGK;>tr|H7C3G9|H7C3G9_HUMAN N-acetyl-D-glucosamine kinase (Fragment) OS=Homo sapien	9	14	14	14	0	14	0	14	0	14	53.5	53.5	53.5	37.375	344	344;390;362;293;172;182;94;109;136	5.79					9	16	3					28	2.9989e-79	0.75469	0.83514	12.138	28	NaN	NaN	#VALUE!	NaN	0	0.75469	0.83514	0.25991
Q9NSV4;C9JDG0;Q9NSV4-6;Q9NSV4-5;Q9NSV4-4;Q9NSV4-7;Q9NSV4-1;Q9NSV4-2	Q9NSV4;C9JDG0;Q9NSV4-6;Q9NSV4-5;Q9NSV4-4;Q9NSV4-7;Q9NSV4-1;Q9NSV4-2	14;14;13;13;13;11;10;7	14;14;13;13;13;11;10;7	14;14;13;13;13;11;10;7	Protein diaphanous homolog 3	DIAPH3	>sp|Q9NSV4|DIAP3_HUMAN Protein diaphanous homolog 3 OS=Homo sapiens GN=DIAPH3 PE=1 SV=4;>tr|C9JDG0|C9JDG0_HUMAN Protein diaphanous homolog 3 OS=Homo sapiens GN=DIAPH3 PE=2 SV=1;>sp|Q9NSV4-6|DIAP3_HUMAN Isoform 6 of Protein diaphanous homolog 3 OS=Homo sapi	8	14	14	14	4	12	4	12	4	12	15.4	15.4	15.4	136.92	1193	1193;1193;1123;1147;1182;1112;849;691	3.18			18	4							10	12	3.6067e-75	0.92492	1.1554	32.011	22	0.97571	1.2464	0.317767	15.994	10	0.68878	0.83536	0.25953
Q8WXF1;Q8WXF1-2	Q8WXF1;Q8WXF1-2	14;11	14;11	14;11	Paraspeckle component 1	PSPC1	>sp|Q8WXF1|PSPC1_HUMAN Paraspeckle component 1 OS=Homo sapiens GN=PSPC1 PE=1 SV=1;>sp|Q8WXF1-2|PSPC1_HUMAN Isoform 2 of Paraspeckle component 1 OS=Homo sapiens GN=PSPC1	2	14	14	14	12	7	12	7	12	7	29.4	29.4	29.4	58.743	523	523;393	5.11				8	17	8	2				21	14	3.6987e-83	0.75794	0.96743	19.509	35	0.77222	1.0624	0.0873271	17.096	21	0.75399	0.8456	0.241953
Q9Y3I0;E7EQS9	Q9Y3I0	14;3	14;3	14;3	tRNA-splicing ligase RtcB homolog	C22orf28	>sp|Q9Y3I0|RTCB_HUMAN tRNA-splicing ligase RtcB homolog OS=Homo sapiens GN=C22orf28 PE=1 SV=1	2	14	14	14	8	12	8	12	8	12	34.1	34.1	34.1	55.21	505	505;175	5.08				12	22	12	2				16	32	4.886e-91	0.79557	0.91835	29.86	48	0.81188	1.112	0.153157	44.341	16	0.78815	0.87292	0.196079
Q10567-3;Q10567-2;Q10567;Q10567-4;C9J1E7	Q10567-3;Q10567-2;Q10567;Q10567-4;C9J1E7	14;14;14;13;11	4;4;4;3;3	4;4;4;3;3	AP-1 complex subunit beta-1	AP1B1	>sp|Q10567-3|AP1B1_HUMAN Isoform C of AP-1 complex subunit beta-1 OS=Homo sapiens GN=AP1B1;>sp|Q10567-2|AP1B1_HUMAN Isoform B of AP-1 complex subunit beta-1 OS=Homo sapiens GN=AP1B1;>sp|Q10567|AP1B1_HUMAN AP-1 complex subunit beta-1 OS=Homo sapiens GN=AP1B	5	14	4	4	2	13	1	3	1	3	15.1	4.3	4.3	103.56	939	939;942;949;919;578	4			2	4	2						1	7	1.8311e-77	0.71717	0.8752	9.7036	8	0.69835	0.87354	-0.195054	NaN	1	0.72354	0.87686	0.189582
O43776;K7EIU7;K7EPK2;B4DG16;K7EJ19;K7EQ35;B4DN60;K7EMQ6	O43776;K7EIU7;K7EPK2;B4DG16	14;7;7;7;6;6;6;5	14;7;7;7;6;6;6;5	14;7;7;7;6;6;6;5	Asparagine--tRNA ligase, cytoplasmic	NARS	>sp|O43776|SYNC_HUMAN Asparagine--tRNA ligase, cytoplasmic OS=Homo sapiens GN=NARS PE=1 SV=1;>tr|K7EIU7|K7EIU7_HUMAN Asparagine--tRNA ligase, cytoplasmic (Fragment) OS=Homo sapiens GN=NARS PE=4 SV=1;>tr|K7EPK2|K7EPK2_HUMAN Asparagine--tRNA ligase, cytoplas	8	14	14	14	7	8	7	8	7	8	27.4	27.4	27.4	62.942	548	548;162;163;174;136;167;299;128	4.79				13	16	2	2				15	18	1.0589e-55	0.79178	0.93606	16.333	33	0.76784	1.0953	0.131326	12.64	15	0.80049	0.88218	0.180855
Q8N8S7-2;Q8N8S7	Q8N8S7-2;Q8N8S7	14;13	14;13	14;13	Protein enabled homolog	ENAH	>sp|Q8N8S7-2|ENAH_HUMAN Isoform 2 of Protein enabled homolog OS=Homo sapiens GN=ENAH;>sp|Q8N8S7|ENAH_HUMAN Protein enabled homolog OS=Homo sapiens GN=ENAH PE=1 SV=2	2	14	14	14	11	6	11	6	11	6	31.1	31.1	31.1	63.924	570	570;591	4.35			1	20	13						24	10	4.068e-99	0.83957	1.1222	21.222	34	0.87267	1.1721	0.229096	17.393	24	0.74868	0.88698	0.173027
Q13442;F8WBW6	Q13442	14;3	14;3	14;3	28 kDa heat- and acid-stable phosphoprotein	PDAP1	>sp|Q13442|HAP28_HUMAN 28 kDa heat- and acid-stable phosphoprotein OS=Homo sapiens GN=PDAP1 PE=1 SV=1	2	14	14	14	13	6	13	6	13	6	49.2	49.2	49.2	20.63	181	181;39	6.54						19	22				31	10	1.0055e-67	0.78942	1.1242	15.218	41	0.78808	1.1595	0.213503	10.24	31	0.80573	0.89536	0.15946
P17174;B7Z7E9	P17174;B7Z7E9	14;12	14;12	14;12	Aspartate aminotransferase, cytoplasmic;Aspartate aminotransferase	GOT1	>sp|P17174|AATC_HUMAN Aspartate aminotransferase, cytoplasmic OS=Homo sapiens GN=GOT1 PE=1 SV=3;>tr|B7Z7E9|B7Z7E9_HUMAN Aspartate aminotransferase OS=Homo sapiens GN=GOT1 PE=2 SV=1	2	14	14	14	8	13	8	13	8	13	49.6	49.6	49.6	46.247	413	413;392	5.93					12	25	9				15	31	6.632e-126	0.78515	0.95168	15.263	46	0.77134	1.0073	0.0104934	10.57	15	0.80611	0.91585	0.126817
Q9Y696	Q9Y696	14	14	14	Chloride intracellular channel protein 4	CLIC4	>sp|Q9Y696|CLIC4_HUMAN Chloride intracellular channel protein 4 OS=Homo sapiens GN=CLIC4 PE=1 SV=4	1	14	14	14	5	11	5	11	5	11	64.8	64.8	64.8	28.772	253	253	6.62						13	21				7	27	7.5955e-132	0.83288	0.94507	23.054	34	0.66642	0.95544	-0.0657628	8.9183	7	0.86994	0.94486	0.0818275
Q9Y617;Q9Y617-2	Q9Y617;Q9Y617-2	14;12	14;12	14;12	Phosphoserine aminotransferase	PSAT1	>sp|Q9Y617|SERC_HUMAN Phosphoserine aminotransferase OS=Homo sapiens GN=PSAT1 PE=1 SV=2;>sp|Q9Y617-2|SERC_HUMAN Isoform 2 of Phosphoserine aminotransferase OS=Homo sapiens GN=PSAT1	2	14	14	14	6	12	6	12	6	12	40.8	40.8	40.8	40.422	370	370;324	5.77		1		1	7	21	5				11	24	1.668e-51	0.84317	0.95824	18.277	33	0.6962	0.9433	-0.0842114	7.9927	10	0.87318	0.96405	0.0528201
Q8NBS9-2;Q86UY0;Q8NBS9	Q8NBS9-2;Q86UY0;Q8NBS9	14;14;14	14;14;14	14;14;14	Thioredoxin domain-containing protein 5	TXNDC5	>sp|Q8NBS9-2|TXND5_HUMAN Isoform 2 of Thioredoxin domain-containing protein 5 OS=Homo sapiens GN=TXNDC5;>tr|Q86UY0|Q86UY0_HUMAN TXNDC5 protein OS=Homo sapiens GN=TXNDC5 PE=2 SV=1;>sp|Q8NBS9|TXND5_HUMAN Thioredoxin domain-containing protein 5 OS=Homo sapien	3	14	14	14	7	12	7	12	7	12	39.5	39.5	39.5	36.177	324	324;360;432	5.17				8	21	11	2				14	28	8.0726e-42	0.81783	1.0057	12.053	41	0.73498	1.0338	0.0479571	9.4213	14	0.86664	0.96848	0.0462058
Q14683;G8JLG1;H0Y7K8	Q14683;G8JLG1	14;7;3	14;7;3	14;7;3	Structural maintenance of chromosomes protein 1A	SMC1A	>sp|Q14683|SMC1A_HUMAN Structural maintenance of chromosomes protein 1A OS=Homo sapiens GN=SMC1A PE=1 SV=2;>tr|G8JLG1|G8JLG1_HUMAN Structural maintenance of chromosomes protein 1A OS=Homo sapiens GN=SMC1A PE=2 SV=1	3	14	14	14	7	12	7	12	7	12	11.7	11.7	11.7	143.23	1233	1233;516;289	2.91	1	2	18		1						8	14	4.4655e-51	0.82299	0.96155	21.393	22	0.77409	0.90837	-0.138648	20.248	8	0.84633	0.97164	0.0415062
P50570-2;P50570-5;P50570;P50570-3;P50570-4;F5H4R9;Q6P2G1;E5RHK8;Q9UQ16-2;Q9UQ16-3;Q9UQ16;Q9UQ16-4;E5RIK2;K7ELR1;K7EPK9	P50570-2;P50570-5;P50570;P50570-3;P50570-4;F5H4R9	14;14;14;13;13;13;4;4;4;4;4;4;2;2;1	14;14;14;13;13;13;4;4;4;4;4;4;2;2;1	9;9;9;8;8;8;1;1;1;1;1;1;1;2;1	Dynamin-2	DNM2	>sp|P50570-2|DYN2_HUMAN Isoform 2 of Dynamin-2 OS=Homo sapiens GN=DNM2;>sp|P50570-5|DYN2_HUMAN Isoform 5 of Dynamin-2 OS=Homo sapiens GN=DNM2;>sp|P50570|DYN2_HUMAN Dynamin-2 OS=Homo sapiens GN=DNM2 PE=1 SV=2;>sp|P50570-3|DYN2_HUMAN Isoform 3 of Dynamin-2 O	15	14	14	9	3	13	3	13	1	9	21.4	21.4	15.7	97.651	866	866;869;870;866;870;870;555;639;859;863;869;873;445;479;51	3.7			9	17	1						3	24	2.0768e-67	0.81742	0.98953	10.932	27	0.69587	0.96321	-0.0540777	14.318	3	0.81784	0.99057	0.0136692
Q8IZL8;I3L3A8;C9JFV4;Q8IZL8-2;F8WDZ1;E7EV54;I3L445;I3L4M7;I3L4P1;I3L1P4	Q8IZL8;I3L3A8;C9JFV4;Q8IZL8-2;F8WDZ1;E7EV54;I3L445	14;13;13;13;12;9;7;4;3;3	14;13;13;13;12;9;7;4;3;3	14;13;13;13;12;9;7;4;3;3	Proline-, glutamic acid- and leucine-rich protein 1	PELP1	>sp|Q8IZL8|PELP1_HUMAN Proline-, glutamic acid- and leucine-rich protein 1 OS=Homo sapiens GN=PELP1 PE=1 SV=2;>tr|I3L3A8|I3L3A8_HUMAN Proline-, glutamic acid- and leucine-rich protein 1 OS=Homo sapiens GN=PELP1 PE=2 SV=1;>tr|C9JFV4|C9JFV4_HUMAN Proline-, g	10	14	14	14	4	13	4	13	4	13	21.7	21.7	21.7	119.7	1130	1130;1180;1274;1275;1040;906;301;151;100;148	2.89	3	8	21	3	2	1					12	26	3.0843e-65	0.82682	0.99842	20.917	38	0.76648	0.91131	-0.133986	14.957	12	0.83406	1.0087	-0.0124972
P49915;F8W720	P49915;F8W720	14;12	14;12	14;12	GMP synthase [glutamine-hydrolyzing]	GMPS	>sp|P49915|GUAA_HUMAN GMP synthase [glutamine-hydrolyzing] OS=Homo sapiens GN=GMPS PE=1 SV=1;>tr|F8W720|F8W720_HUMAN GMP synthase [glutamine-hydrolyzing] OS=Homo sapiens GN=GMPS PE=2 SV=1	2	14	14	14	1	14	1	14	1	14	31.7	31.7	31.7	76.715	693	693;594	4.32				19	9						1	27	4.6754e-91	0.92713	1.0435	11.993	28	0.82285	1.1255	0.170566	NaN	1	0.93937	1.0413	-0.0583858
P49750-3;P49750;P49750-4;H0YIQ2;F8VU51;H0YI23	P49750-3;P49750;P49750-4;H0YIQ2;F8VU51	14;14;14;12;7;3	14;14;14;12;7;3	14;14;14;12;7;3	YLP motif-containing protein 1	YLPM1	>sp|P49750-3|YLPM1_HUMAN Isoform 3 of YLP motif-containing protein 1 OS=Homo sapiens GN=YLPM1;>sp|P49750|YLPM1_HUMAN YLP motif-containing protein 1 OS=Homo sapiens GN=YLPM1 PE=1 SV=3;>sp|P49750-4|YLPM1_HUMAN Isoform 4 of YLP motif-containing protein 1 OS=H	6	14	14	14	9	10	9	10	9	10	11.5	11.5	11.5	209.48	1862	1862;1951;2146;1595;1440;466	2.42	1	20	9	3							21	12	3.2472e-68	0.79194	1.0353	26.352	33	0.79194	1.0257	0.0366088	27.778	21	0.78895	1.042	-0.0593553
P12004	P12004	14	14	14	Proliferating cell nuclear antigen	PCNA	>sp|P12004|PCNA_HUMAN Proliferating cell nuclear antigen OS=Homo sapiens GN=PCNA PE=1 SV=1	1	14	14	14	2	14	2	14	2	14	70.5	70.5	70.5	28.768	261	261	6.07					9	21	12				2	40	1.4405e-128	0.98701	1.0372	17.721	42	0.7019	0.91774	-0.123843	12.647	2	0.9965	1.0426	-0.0601858
P05388;Q3B7A4;F8VWS0;F8VU65;F8VPE8;G3V210;F8VW21;F8VQY6;F8VRK7;F8VZS0;F8VWV4;F8VS58;Q8NHW5;F8W1K8	P05388;Q3B7A4;F8VWS0;F8VU65;F8VPE8;G3V210;F8VW21;F8VQY6;F8VRK7;F8VZS0;F8VWV4;F8VS58;Q8NHW5	14;13;13;12;11;11;11;10;10;9;8;8;8;2	14;13;13;12;11;11;11;10;10;9;8;8;8;2	14;13;13;12;11;11;11;10;10;9;8;8;8;2	60S acidic ribosomal protein P0;60S acidic ribosomal protein P0-like	RPLP0;RPLP0P6	>sp|P05388|RLA0_HUMAN 60S acidic ribosomal protein P0 OS=Homo sapiens GN=RPLP0 PE=1 SV=1;>tr|Q3B7A4|Q3B7A4_HUMAN 60S acidic ribosomal protein P0 OS=Homo sapiens GN=RPLP0 PE=2 SV=1;>tr|F8VWS0|F8VWS0_HUMAN 60S acidic ribosomal protein P0 OS=Homo sapiens GN=R	14	14	14	14	7	13	7	13	7	13	53.6	53.6	53.6	34.273	317	317;255;281;247;153;166;244;142;156;246;111;121;317;107	6.02					15	26	14	1			13	43	1.4358e-93	0.98109	1.0121	32.515	54	0.63487	0.87135	-0.198676	38.374	13	0.99913	1.0518	-0.0728604
Q99497;K7ELW0;K7EN27	Q99497;K7ELW0;K7EN27	14;12;9	14;12;9	14;12;9	Protein DJ-1	PARK7	>sp|Q99497|PARK7_HUMAN Protein DJ-1 OS=Homo sapiens GN=PARK7 PE=1 SV=2;>tr|K7ELW0|K7ELW0_HUMAN Protein DJ-1 OS=Homo sapiens GN=PARK7 PE=4 SV=1;>tr|K7EN27|K7EN27_HUMAN Protein DJ-1 (Fragment) OS=Homo sapiens GN=PARK7 PE=4 SV=1	3	14	14	14	8	12	8	12	8	12	66.1	66.1	66.1	19.891	189	189;169;160	6.78					1	13	31	4			16	33	2.3846e-93	0.92455	1.0241	11.045	49	0.64315	0.91944	-0.121173	7.2432	16	0.99341	1.0559	-0.0784732
P39656;E7EWT1	P39656;E7EWT1	14;12	14;12	14;12	Dolichyl-diphosphooligosaccharide--protein glycosyltransferase 48 kDa subunit	DDOST	>sp|P39656|OST48_HUMAN Dolichyl-diphosphooligosaccharide--protein glycosyltransferase 48 kDa subunit OS=Homo sapiens GN=DDOST PE=1 SV=4;>tr|E7EWT1|E7EWT1_HUMAN Dolichyl-diphosphooligosaccharide--protein glycosyltransferase 48 kDa subunit OS=Homo sapiens GN	2	14	14	14	2	14	2	14	2	14	49.1	49.1	49.1	50.8	456	456;419	5.44				2	20	15	2				5	34	1.2708e-81	0.95535	1.0484	15.474	39	0.67445	0.90276	-0.147586	8.8941	5	0.97133	1.0561	-0.0787464
Q99536;B4DPX4;B0AZP7;K7ESA3;K7ERT7;K7EJM4;K7ENX2;K7EM19	Q99536;B4DPX4;B0AZP7	14;11;8;6;6;2;2;2	14;11;8;6;6;2;2;2	14;11;8;6;6;2;2;2	Synaptic vesicle membrane protein VAT-1 homolog	VAT1	>sp|Q99536|VAT1_HUMAN Synaptic vesicle membrane protein VAT-1 homolog OS=Homo sapiens GN=VAT1 PE=1 SV=2;>tr|B4DPX4|B4DPX4_HUMAN Chromaffin granule amine transporter OS=Homo sapiens GN=VAT1 PE=2 SV=1;>tr|B0AZP7|B0AZP7_HUMAN Chromaffin granule amine transpor	8	14	14	14	8	12	8	12	8	12	47.6	47.6	47.6	41.92	393	393;325;259;125;146;30;151;154	5.57				3	24	24	4	1			22	34	1.5477e-93	0.86367	0.97722	16.249	56	0.66341	0.89092	-0.166632	13.865	22	0.97375	1.0895	-0.123666
P62906	P62906	14	14	14	60S ribosomal protein L10a	RPL10A	>sp|P62906|RL10A_HUMAN 60S ribosomal protein L10a OS=Homo sapiens GN=RPL10A PE=1 SV=2	1	14	14	14	12	9	12	9	12	9	56.7	56.7	56.7	24.831	217	217	6.64						21	33	1			24	31	1.5769e-75	0.96028	1.0411	14.261	54	0.63623	0.89863	-0.154201	9.9025	24	1.0378	1.096	-0.132248
P12235	P12235	14	4	4	ADP/ATP translocase 1	SLC25A4	>sp|P12235|ADT1_HUMAN ADP/ATP translocase 1 OS=Homo sapiens GN=SLC25A4 PE=1 SV=4	1	14	4	4	5	13	2	4	2	4	42.3	10.4	10.4	33.064	298	298	6.56						4	5				3	6	1.6451e-45	0.87551	1.0554	26.351	9	0.65739	0.89633	-0.157898	47.528	3	0.93929	1.0978	-0.134615
P25786;P25786-2;F5GX11;B4DEV8	P25786;P25786-2;F5GX11	14;14;12;6	14;14;12;6	14;14;12;6	Proteasome subunit alpha type-1	PSMA1	>sp|P25786|PSA1_HUMAN Proteasome subunit alpha type-1 OS=Homo sapiens GN=PSMA1 PE=1 SV=1;>sp|P25786-2|PSA1_HUMAN Isoform Long of Proteasome subunit alpha type-1 OS=Homo sapiens GN=PSMA1;>tr|F5GX11|F5GX11_HUMAN Proteasome subunit alpha type-1 OS=Homo sapien	4	14	14	14	4	11	4	11	4	11	53.2	53.2	53.2	29.555	263	263;269;238;164	6.5						13	13				6	20	7.5973e-61	0.96688	1.0738	11.972	26	0.60863	0.88967	-0.168658	11.014	6	1.0153	1.1022	-0.140386
P12429;D6RA82;D6RFG5;D6RCA8;D6RAZ8;D6RFJ9	P12429;D6RA82	14;12;6;4;3;2	14;12;6;4;3;2	14;12;6;4;3;2	Annexin A3;Annexin	ANXA3	>sp|P12429|ANXA3_HUMAN Annexin A3 OS=Homo sapiens GN=ANXA3 PE=1 SV=3;>tr|D6RA82|D6RA82_HUMAN Annexin OS=Homo sapiens GN=ANXA3 PE=2 SV=1	6	14	14	14	4	14	4	14	4	14	49.5	49.5	49.5	36.375	323	323;284;154;134;104;55	6.4					1	16	13				7	23	5.1393e-78	0.94651	1.0603	46.68	28	0.66872	0.94915	-0.075292	13.345	7	0.9746	1.1049	-0.143916
Q27J81-2;Q27J81;H7BXE4;Q27J81-3	Q27J81-2;Q27J81	14;14;5;1	14;14;5;1	14;14;5;1	Inverted formin-2	INF2	>sp|Q27J81-2|INF2_HUMAN Isoform 2 of Inverted formin-2 OS=Homo sapiens GN=INF2;>sp|Q27J81|INF2_HUMAN Inverted formin-2 OS=Homo sapiens GN=INF2 PE=1 SV=2	4	14	14	14	7	9	7	9	7	9	20.6	20.6	20.6	134.62	1240	1240;1249;380;234	3		1	19	1							8	13	1.6933e-114	0.86112	0.98966	35.384	19	0.43283	0.63835	-0.64758	25.202	7	0.92851	1.109	-0.149259
P46779;P46779-2;P46779-3;H0YKD8;P46779-4;P46779-5;H0YMF4;H0YLP6	P46779;P46779-2;P46779-3;H0YKD8;P46779-4;P46779-5;H0YMF4;H0YLP6	14;12;12;12;9;9;9;7	14;12;12;12;9;9;9;7	14;12;12;12;9;9;9;7	60S ribosomal protein L28	RPL28	>sp|P46779|RL28_HUMAN 60S ribosomal protein L28 OS=Homo sapiens GN=RPL28 PE=1 SV=3;>sp|P46779-2|RL28_HUMAN Isoform 2 of 60S ribosomal protein L28 OS=Homo sapiens GN=RPL28;>sp|P46779-3|RL28_HUMAN Isoform 3 of 60S ribosomal protein L28 OS=Homo sapiens GN=RPL	8	14	14	14	12	9	12	9	12	9	65	65	65	15.747	137	137;163;169;170;69;87;112;89	7.7						3	16	22	2	3	20	26	4.8556e-53	0.94043	1.0339	16.282	46	0.63672	0.90662	-0.14143	10.153	20	1.0322	1.1108	-0.151599
P17858;P17858-2;P08237;P08237-3	P17858;P17858-2	14;13;2;2	12;12;1;1	12;12;1;1	6-phosphofructokinase, liver type	PFKL	>sp|P17858|K6PL_HUMAN 6-phosphofructokinase, liver type OS=Homo sapiens GN=PFKL PE=1 SV=6;>sp|P17858-2|K6PL_HUMAN Isoform 2 of 6-phosphofructokinase, liver type OS=Homo sapiens GN=PFKL	4	14	12	12	2	13	1	11	1	11	24.7	21.2	21.2	85.018	780	780;827;780;851	3.58	2	2	3	17	2						2	24	8.2176e-110	0.94917	1.098	11.697	23	0.6922	0.93078	-0.103488	2.9049	2	0.95406	1.1157	-0.157949
Q07020;G3V203;J3QQ67;F8VYV2;F8VWC5;H0YHA7;F8VUA6;F8VXR6	Q07020;G3V203;J3QQ67;F8VYV2;F8VWC5;H0YHA7;F8VUA6	14;13;12;11;11;11;8;3	14;13;12;11;11;11;8;3	14;13;12;11;11;11;8;3	60S ribosomal protein L18	RPL18	>sp|Q07020|RL18_HUMAN 60S ribosomal protein L18 OS=Homo sapiens GN=RPL18 PE=1 SV=2;>tr|G3V203|G3V203_HUMAN 60S ribosomal protein L18 OS=Homo sapiens GN=RPL18 PE=2 SV=1;>tr|J3QQ67|J3QQ67_HUMAN 60S ribosomal protein L18 (Fragment) OS=Homo sapiens GN=RPL18 PE	8	14	14	14	13	8	13	8	13	8	58.5	58.5	58.5	21.634	188	188;164;190;133;159;167;130;84	7.18						8	30	11		2	27	24	4.341e-71	0.71132	1.0014	61.325	50	0.62205	0.88466	-0.176805	79.847	26	1.0456	1.1181	-0.161049
P11387;E5RIC7;Q969P6-2;Q969P6;E5RJ95;E5RFS0	P11387	14;2;2;2;1;1	14;2;2;2;1;1	14;2;2;2;1;1	DNA topoisomerase 1	TOP1	>sp|P11387|TOP1_HUMAN DNA topoisomerase 1 OS=Homo sapiens GN=TOP1 PE=1 SV=2	6	14	14	14	4	10	4	10	4	10	18.4	18.4	18.4	90.725	765	765;376;503;601;201;221	4.06			3	14				1			5	13	2.3204e-41	0.92085	1.052	45.009	18	0.61523	0.74648	-0.421824	11.798	5	1.0163	1.1313	-0.177982
P47756-2;B1AK87;B1AK88	P47756-2;B1AK87;B1AK88	14;13;13	14;13;13	3;3;3		CAPZB	>sp|P47756-2|CAPZB_HUMAN Isoform 2 of F-actin-capping protein subunit beta OS=Homo sapiens GN=CAPZB;>tr|B1AK87|B1AK87_HUMAN Capping protein (Actin filament) muscle Z-line, beta, isoform CRA_a OS=Homo sapiens GN=CAPZB PE=2 SV=1;>tr|B1AK88|B1AK88_HUMAN Cappi	3	14	14	3	10	12	10	12	2	2	61.8	61.8	8.8	30.628	272	272;260;301	6.45					4	17	22	1			14	30	3.415e-66	0.95489	1.0654	17.438	44	0.61351	0.86218	-0.213939	10.435	14	1.0024	1.1317	-0.178492
P29144;Q5VZU9	P29144;Q5VZU9	14;14	14;14	14;14	Tripeptidyl-peptidase 2	TPP2	>sp|P29144|TPP2_HUMAN Tripeptidyl-peptidase 2 OS=Homo sapiens GN=TPP2 PE=1 SV=4;>tr|Q5VZU9|Q5VZU9_HUMAN Tripeptidyl-peptidase 2 OS=Homo sapiens GN=TPP2 PE=2 SV=1	2	14	14	14	4	11	4	11	4	11	16.4	16.4	16.4	138.35	1249	1249;1262	3.24			19	6							10	15	7.9346e-119	0.85113	1.0272	25.345	23	0.71861	0.83146	-0.266281	11.619	10	0.90895	1.1392	-0.188021
Q29RF7;H0Y9L6;Q29RF7-3	Q29RF7	14;3;2	14;3;2	14;3;2	Sister chromatid cohesion protein PDS5 homolog A	PDS5A	>sp|Q29RF7|PDS5A_HUMAN Sister chromatid cohesion protein PDS5 homolog A OS=Homo sapiens GN=PDS5A PE=1 SV=1	3	14	14	14	7	8	7	8	7	8	18.8	18.8	18.8	150.83	1337	1337;126;600	3.25			15	5							12	8	3.5882e-105	0.70057	0.87331	24.632	20	0.67073	0.83038	-0.268156	15.4	12	0.95719	1.1464	-0.197111
O00232;O00232-2	O00232;O00232-2	14;13	14;13	14;13	26S proteasome non-ATPase regulatory subunit 12	PSMD12	>sp|O00232|PSD12_HUMAN 26S proteasome non-ATPase regulatory subunit 12 OS=Homo sapiens GN=PSMD12 PE=1 SV=3;>sp|O00232-2|PSD12_HUMAN Isoform 2 of 26S proteasome non-ATPase regulatory subunit 12 OS=Homo sapiens GN=PSMD12	2	14	14	14	0	14	0	14	0	14	34.9	34.9	34.9	52.904	456	456;436	5.1				1	16	3						20	2.2677e-73	1.0219	1.1482	8.6839	19	NaN	NaN	#VALUE!	NaN	0	1.0219	1.1482	-0.199374
P46777;Q5T7N0;R4GNJ2	P46777	14;2;1	14;2;1	14;2;1	60S ribosomal protein L5	RPL5	>sp|P46777|RL5_HUMAN 60S ribosomal protein L5 OS=Homo sapiens GN=RPL5 PE=1 SV=3	3	14	14	14	6	13	6	13	6	13	36.7	36.7	36.7	34.362	297	297;130;63	4.42	11	7	5	2	12	22	8				13	54	3.503e-41	1.0102	1.1395	28.97	67	0.6179	0.81038	-0.30333	24.942	13	1.0487	1.1662	-0.221815
P15880;H0YEN5;E9PQD7;E9PMM9;E9PPT0;I3L404;E9PM36;H3BNG3;H0YE27	P15880;H0YEN5;E9PQD7;E9PMM9;E9PPT0	14;11;10;9;8;6;5;1;1	14;11;10;9;8;6;5;1;1	14;11;10;9;8;6;5;1;1	40S ribosomal protein S2	RPS2	>sp|P15880|RS2_HUMAN 40S ribosomal protein S2 OS=Homo sapiens GN=RPS2 PE=1 SV=2;>tr|H0YEN5|H0YEN5_HUMAN 40S ribosomal protein S2 (Fragment) OS=Homo sapiens GN=RPS2 PE=2 SV=1;>tr|E9PQD7|E9PQD7_HUMAN 40S ribosomal protein S2 OS=Homo sapiens GN=RPS2 PE=2 SV=1	9	14	14	14	9	13	9	13	9	13	46.8	46.8	46.8	31.324	293	293;195;235;218;197;155;209;44;63	6.46					7	24	27	2		1	18	43	2.7149e-60	1.0684	1.1583	23.343	60	0.59122	0.80404	-0.314661	12.698	18	1.117	1.2046	-0.268554
Q86V48-2;Q86V48-3;Q86V48;E5RFK8	Q86V48-2;Q86V48-3;Q86V48	14;14;14;2	14;14;14;2	14;14;14;2	Leucine zipper protein 1	LUZP1	>sp|Q86V48-2|LUZP1_HUMAN Isoform 2 of Leucine zipper protein 1 OS=Homo sapiens GN=LUZP1;>sp|Q86V48-3|LUZP1_HUMAN Isoform 3 of Leucine zipper protein 1 OS=Homo sapiens GN=LUZP1;>sp|Q86V48|LUZP1_HUMAN Leucine zipper protein 1 OS=Homo sapiens GN=LUZP1 PE=1 SV	4	14	14	14	13	3	13	3	13	3	21.2	21.2	21.2	114.59	1026	1026;1053;1076;273	4.06			11	15	7	3					32	4	5.9121e-52	0.55785	0.70974	32.52	36	0.54616	0.70619	-0.501872	23.313	32	1.0232	1.2105	-0.275603
P48634;P48634-2;P48634-3;P48634-4	P48634;P48634-2;P48634-3;P48634-4	14;13;13;9	13;12;12;8	13;12;12;8	Protein PRRC2A	PRRC2A	>sp|P48634|PRC2A_HUMAN Protein PRRC2A OS=Homo sapiens GN=PRRC2A PE=1 SV=3;>sp|P48634-2|PRC2A_HUMAN Isoform 2 of Protein PRRC2A OS=Homo sapiens GN=PRRC2A;>sp|P48634-3|PRC2A_HUMAN Isoform 3 of Protein PRRC2A OS=Homo sapiens GN=PRRC2A;>sp|P48634-4|PRC2A_HUMAN	4	14	13	13	13	5	12	4	12	4	9.6	9.2	9.2	228.86	2157	2157;2144;2156;1533	2.56	1	15	13	3							25	7	9.1486e-32	0.55175	0.71086	38.795	31	0.51753	0.69188	-0.531406	22.09	24	1.0797	1.2228	-0.290188
M0R0F0;P46782;M0R0R2;M0QZN2	M0R0F0;P46782;M0R0R2;M0QZN2	14;14;13;9	14;14;13;9	14;14;13;9	40S ribosomal protein S5;40S ribosomal protein S5, N-terminally processed	RPS5	>tr|M0R0F0|M0R0F0_HUMAN 40S ribosomal protein S5 (Fragment) OS=Homo sapiens GN=RPS5 PE=3 SV=1;>sp|P46782|RS5_HUMAN 40S ribosomal protein S5 OS=Homo sapiens GN=RPS5 PE=1 SV=4;>tr|M0R0R2|M0R0R2_HUMAN 40S ribosomal protein S5 OS=Homo sapiens GN=RPS5 PE=3 SV=1	4	14	14	14	11	10	11	10	11	10	66.5	66.5	66.5	22.391	200	200;204;225;134	7.15					1	7	24	13		1	23	23	1.7717e-134	0.92329	1.0702	22.029	46	0.6267	0.86461	-0.209879	19.064	23	1.1194	1.2521	-0.32435
P62249;M0R210;M0R3H0;M0R1M5;Q6IPX4;M0QX76	P62249;M0R210;M0R3H0;M0R1M5;Q6IPX4	14;12;9;7;7;4	14;12;9;7;7;4	14;12;9;7;7;4	40S ribosomal protein S16	RPS16	>sp|P62249|RS16_HUMAN 40S ribosomal protein S16 OS=Homo sapiens GN=RPS16 PE=1 SV=2;>tr|M0R210|M0R210_HUMAN 40S ribosomal protein S16 OS=Homo sapiens GN=RPS16 PE=3 SV=1;>tr|M0R3H0|M0R3H0_HUMAN 40S ribosomal protein S16 OS=Homo sapiens GN=RPS16 PE=3 SV=1;>tr	6	14	14	14	5	12	5	12	5	12	68.5	68.5	68.5	16.445	146	146;129;100;85;152;50	7.92						1	13	19	2	5	8	32	4.4444e-42	1.0955	1.2292	21.346	38	0.59158	0.82712	-0.273831	12.829	7	1.1249	1.2628	-0.336626
P05023-4;P05023;P05023-3;P05023-2;M0R116;P13637;P13637-2;P13637-3;B1AKY9;P50993;Q5TC01;H0Y7C1;Q13733;Q5TC02;M0QXF2;E9PRA5;P20648	P05023-4;P05023;P05023-3;P05023-2	14;14;13;11;5;5;5;5;3;3;2;2;2;1;1;1;1	14;14;13;11;5;5;5;5;3;3;2;2;2;1;1;1;1	13;13;12;10;4;4;4;4;2;2;2;1;1;1;1;1;0	Sodium/potassium-transporting ATPase subunit alpha-1	ATP1A1	>sp|P05023-4|AT1A1_HUMAN Isoform 4 of Sodium/potassium-transporting ATPase subunit alpha-1 OS=Homo sapiens GN=ATP1A1;>sp|P05023|AT1A1_HUMAN Sodium/potassium-transporting ATPase subunit alpha-1 OS=Homo sapiens GN=ATP1A1 PE=1 SV=1;>sp|P05023-3|AT1A1_HUMAN Is	17	14	14	13	5	10	5	10	5	9	16.2	16.2	15	113	1023	1023;1023;992;681;983;1013;1024;1026;1009;1020;144;714;1029;106;178;517;1035	3.13	3	8	16	18	1						14	32	6.751e-70	1.0569	1.2543	36.417	46	0.56505	0.78216	-0.354464	13.947	14	1.1336	1.3316	-0.413161
Q06210-2;Q06210;O94808;E5RJP4	Q06210-2;Q06210	14;14;3;1	14;14;3;1	14;14;3;1	Glutamine--fructose-6-phosphate aminotransferase [isomerizing] 1	GFPT1	>sp|Q06210-2|GFPT1_HUMAN Isoform 2 of Glutamine--fructose-6-phosphate aminotransferase [isomerizing] 1 OS=Homo sapiens GN=GFPT1;>sp|Q06210|GFPT1_HUMAN Glutamine--fructose-6-phosphate aminotransferase [isomerizing] 1 OS=Homo sapiens GN=GFPT1 PE=1 SV=3	4	14	14	14	1	14	1	14	1	14	28.2	28.2	28.2	76.758	681	681;699;682;216	4.14				19	3						2	20	3.3053e-110	1.3727	1.5125	27.827	22	0.49367	0.63686	-0.650952	0.80372	2	1.3769	1.5341	-0.617393
Q00688;G3V5F2	Q00688	14;2	14;2	14;2	Peptidyl-prolyl cis-trans isomerase FKBP3	FKBP3	>sp|Q00688|FKBP3_HUMAN Peptidyl-prolyl cis-trans isomerase FKBP3 OS=Homo sapiens GN=FKBP3 PE=1 SV=1	2	14	14	14	13	5	13	5	13	5	49.1	49.1	49.1	25.177	224	224;65	6.58						15	21				26	10	8.3358e-54	0.4963	0.69575	50.328	36	0.46156	0.66758	-0.582987	38.141	26	1.5433	1.626	-0.701327
P07737;K7EJ44;I3L3D5;CON__P02584	P07737;K7EJ44	14;9;5;4	14;9;5;4	14;9;5;4	Profilin-1	PFN1	>sp|P07737|PROF1_HUMAN Profilin-1 OS=Homo sapiens GN=PFN1 PE=1 SV=2;>tr|K7EJ44|K7EJ44_HUMAN Profilin 1, isoform CRA_b OS=Homo sapiens GN=PFN1 PE=4 SV=1	4	14	14	14	13	12	13	12	13	12	86.4	86.4	86.4	15.054	140	140;104;165;140	8.03	1					3	34	76	14	19	33	114	1.99e-191	1.5356	1.7088	48.346	138	0.44417	0.62036	-0.688822	34.431	33	1.5727	1.7884	-0.838669
O00748;O00748-2;J3QSC0;Q5XG92-4;Q5XG92-6;Q5XG92-2;F5H5S4;P22303-3;Q5XG92;P22303-4;P22303;P22303-2	O00748;O00748-2	13;11;6;1;1;1;1;1;1;1;1;1	13;11;6;1;1;1;1;1;1;1;1;1	13;11;6;1;1;1;1;1;1;1;1;1	Cocaine esterase	CES2	>sp|O00748|EST2_HUMAN Cocaine esterase OS=Homo sapiens GN=CES2 PE=1 SV=1;>sp|O00748-2|EST2_HUMAN Isoform 2 of Cocaine esterase OS=Homo sapiens GN=CES2	12	13	13	13	4	13	4	13	4	13	34.2	34.2	34.2	61.806	559	559;543;201;367;463;491;514;526;561;603;614;617	4.27	3	3	3	13	21	5					15	33	1.3144e-72	0.32046	0.3684	99.968	47	1.8302	2.5112	1.32838	12.097	15	0.25815	0.29873	1.74309
Q96IZ0;H0YI16;H0YHP5;F8W1M8	Q96IZ0	13;6;4;1	13;6;4;1	13;6;4;1	PRKC apoptosis WT1 regulator protein	PAWR	>sp|Q96IZ0|PAWR_HUMAN PRKC apoptosis WT1 regulator protein OS=Homo sapiens GN=PAWR PE=1 SV=1	4	13	13	13	9	6	9	6	9	6	50	50	50	36.567	340	340;194;72;76	5.73				1	14	12	5	1			23	10	3.2386e-64	1.4988	2.1288	83.219	33	1.6775	2.3004	1.20188	11.994	23	0.31905	0.36199	1.46598
P23743;G3V4E1;Q3ZE25;F8W1H7;G3V327;C9JM35;P23743-2;F8W1M3;F8VNZ9;H0YJH4;F8VWX8;G3V4I3;G3V312	P23743;G3V4E1;Q3ZE25	13;9;8;5;3;3;3;3;2;2;1;1;1	13;9;8;5;3;3;3;3;2;2;1;1;1	13;9;8;5;3;3;3;3;2;2;1;1;1	Diacylglycerol kinase alpha	DGKA	>sp|P23743|DGKA_HUMAN Diacylglycerol kinase alpha OS=Homo sapiens GN=DGKA PE=1 SV=3;>tr|G3V4E1|G3V4E1_HUMAN Diacylglycerol kinase alpha (Fragment) OS=Homo sapiens GN=DGKA PE=2 SV=1;>tr|Q3ZE25|Q3ZE25_HUMAN Diacylglycerol kinase alpha OS=Homo sapiens GN=DGKA	13	13	13	13	2	13	2	13	2	13	26.4	26.4	26.4	82.629	735	735;545;247;147;107;116;118;133;58;202;21;44;95	4.24				17	3	1					5	16	1.108e-99	0.3355	0.38778	58.453	17	1.5919	2.0439	1.03132	20.467	2	0.32646	0.38313	1.38409
P00568;Q5T9B7;H0Y4J6;H0YID2;Q9Y6K8-2;Q9Y6K8-3;Q9Y6K8	P00568;Q5T9B7;H0Y4J6	13;13;7;4;1;1;1	13;13;7;4;1;1;1	13;13;7;4;1;1;1	Adenylate kinase isoenzyme 1	AK1	>sp|P00568|KAD1_HUMAN Adenylate kinase isoenzyme 1 OS=Homo sapiens GN=AK1 PE=1 SV=3;>tr|Q5T9B7|Q5T9B7_HUMAN Adenylate kinase isoenzyme 1 OS=Homo sapiens GN=AK1 PE=2 SV=1;>tr|H0Y4J6|H0Y4J6_HUMAN Adenylate kinase isoenzyme 1 (Fragment) OS=Homo sapiens GN=AK1	7	13	13	13	9	13	9	13	9	13	60.3	60.3	60.3	21.635	194	194;210;135;51;197;536;562	7.02						8	37	9			21	33	5.1187e-86	0.40002	0.44065	83.057	54	1.5334	2.1584	1.10996	12.443	21	0.35212	0.39042	1.3569
Q8N3F8;H0Y6J8;B0QY86;B0QY91;Q68D58	Q8N3F8	13;5;3;1;1	13;5;3;1;1	13;5;3;1;1	MICAL-like protein 1	MICALL1	>sp|Q8N3F8|MILK1_HUMAN MICAL-like protein 1 OS=Homo sapiens GN=MICALL1 PE=1 SV=2	5	13	13	13	12	3	12	3	12	3	23.6	23.6	23.6	93.44	863	863;370;210;186;290	3.5			17	11	2						26	4	2.5422e-66	1.3987	1.6595	56.999	30	1.4493	1.7206	0.782912	43.32	26	0.35127	0.43073	1.21514
Q96DG6	Q96DG6	13	13	13	Carboxymethylenebutenolidase homolog	CMBL	>sp|Q96DG6|CMBL_HUMAN Carboxymethylenebutenolidase homolog OS=Homo sapiens GN=CMBL PE=1 SV=1	1	13	13	13	2	13	2	13	2	13	44.5	44.5	44.5	28.048	245	245	6.59						12	14	1			2	25	3.6466e-83	0.43004	0.46465	35.779	27	0.97371	1.3339	0.415651	24.726	2	0.42218	0.46403	1.10771
P53999;D6RC37;D6R970	P53999	13;5;5	13;5;5	13;5;5	Activated RNA polymerase II transcriptional coactivator p15	SUB1	>sp|P53999|TCP4_HUMAN Activated RNA polymerase II transcriptional coactivator p15 OS=Homo sapiens GN=SUB1 PE=1 SV=3	3	13	13	13	6	12	6	12	6	12	52	52	52	14.395	127	127;66;84	7.9							15	30	2	4	21	30	3.1573e-72	0.55423	0.6203	50.899	48	1.0857	1.5122	0.596649	10.165	21	0.48873	0.54599	0.873054
Q13620-1;K4DI93;Q13620;Q13620-3;A6NE76	Q13620-1;K4DI93;Q13620;Q13620-3	13;12;12;11;4	13;12;12;11;4	10;9;9;8;2	Cullin-4B	CUL4B	>sp|Q13620-1|CUL4B_HUMAN Isoform 2 of Cullin-4B OS=Homo sapiens GN=CUL4B;>tr|K4DI93|K4DI93_HUMAN Cullin 4B, isoform CRA_e OS=Homo sapiens GN=CUL4B PE=3 SV=1;>sp|Q13620|CUL4B_HUMAN Cullin-4B OS=Homo sapiens GN=CUL4B PE=1 SV=4;>sp|Q13620-3|CUL4B_HUMAN Isofor	5	13	13	10	3	10	3	10	3	7	19.9	19.9	16.3	102.3	895	895;900;913;717;234	3.85			4	15	1						4	16	5.3844e-92	0.52734	0.6022	38.96	19	1.1207	1.4122	0.497944	10.538	4	0.49163	0.57175	0.806544
O14950	O14950	13	13	1	Myosin regulatory light chain 12B	MYL12B	>sp|O14950|ML12B_HUMAN Myosin regulatory light chain 12B OS=Homo sapiens GN=MYL12B PE=1 SV=2	1	13	13	1	8	13	8	13	0	1	83.7	83.7	17.4	19.779	172	172	7.93						3	39	41	6	16	21	84	3.0201e-263	0.54251	0.61092	50.221	102	1.1363	1.544	0.626673	15.201	20	0.52618	0.59155	0.757428
Q13308-4;Q13308;Q13308-6;Q13308-3;Q13308-2;Q13308-5;Q86X91;C9JQR6;H7C5L0;H0Y8F1;F8WDG7	Q13308-4;Q13308;Q13308-6;Q13308-3;Q13308-2;Q13308-5;Q86X91	13;13;13;12;12;8;7;5;3;3;2	13;13;13;12;12;8;7;5;3;3;2	13;13;13;12;12;8;7;5;3;3;2	Inactive tyrosine-protein kinase 7	PTK7	>sp|Q13308-4|PTK7_HUMAN Isoform 4 of Inactive tyrosine-protein kinase 7 OS=Homo sapiens GN=PTK7;>sp|Q13308|PTK7_HUMAN Inactive tyrosine-protein kinase 7 OS=Homo sapiens GN=PTK7 PE=1 SV=2;>sp|Q13308-6|PTK7_HUMAN Isoform 6 of Inactive tyrosine-protein kinase	11	13	13	13	1	12	1	12	1	12	16.7	16.7	16.7	112.26	1014	1014;1070;1078;940;1030;816;459;257;269;365;157	3.2		1	15	3	1						6	14	2.3144e-43	0.53017	0.60953	39.392	20	1.0609	1.2715	0.346531	21.777	6	0.51204	0.59515	0.748675
Q9BWD1;B7Z233	Q9BWD1;B7Z233	13;11	13;11	13;11	Acetyl-CoA acetyltransferase, cytosolic	ACAT2	>sp|Q9BWD1|THIC_HUMAN Acetyl-CoA acetyltransferase, cytosolic OS=Homo sapiens GN=ACAT2 PE=1 SV=2;>tr|B7Z233|B7Z233_HUMAN Sterol O-acyltransferase 2 OS=Homo sapiens GN=ACAT2 PE=2 SV=1	2	13	13	13	9	11	9	11	9	11	51.6	51.6	51.6	41.35	397	397;426	6					16	33	12			1	22	40	9.1294e-96	0.60801	0.68117	46.37	61	1.0737	1.4831	0.568616	13.946	21	0.56266	0.63261	0.660612
P61106	P61106	13	13	13	Ras-related protein Rab-14	RAB14	>sp|P61106|RAB14_HUMAN Ras-related protein Rab-14 OS=Homo sapiens GN=RAB14 PE=1 SV=4	1	13	13	13	2	13	2	13	2	13	74.9	74.9	74.9	23.897	215	215	6.79						9	16	3			3	25	2.2702e-74	0.5923	0.66148	30.805	27	1.2175	1.633	0.707525	32.438	2	0.59127	0.65236	0.61626
P35222;B4DGU4;E7EMJ5;P35222-2;E9PDF9;E7EV28	P35222;B4DGU4	13;12;2;1;1;1	13;12;2;1;1;1	12;11;2;1;1;1	Catenin beta-1	CTNNB1	>sp|P35222|CTNB1_HUMAN Catenin beta-1 OS=Homo sapiens GN=CTNNB1 PE=1 SV=1;>tr|B4DGU4|B4DGU4_HUMAN Catenin beta-1 OS=Homo sapiens GN=CTNNB1 PE=2 SV=1	6	13	13	12	4	12	4	12	4	11	25.6	25.6	24.6	85.496	781	781;774;150;88;100;108	4			5	20	5						7	23	6.7904e-107	0.59202	0.68698	34.44	30	1.0501	1.3577	0.441165	15.149	7	0.58386	0.67302	0.571279
P29317	P29317	13	13	13	Ephrin type-A receptor 2	EPHA2	>sp|P29317|EPHA2_HUMAN Ephrin type-A receptor 2 OS=Homo sapiens GN=EPHA2 PE=1 SV=2	1	13	13	13	6	10	6	10	6	10	15.6	15.6	15.6	108.27	976	976	3.9			10	16	3	2					13	18	1.4468e-48	0.70077	0.84207	31.459	31	0.97364	1.2276	0.295841	17.052	13	0.61265	0.7034	0.507583
P19105;J3QRS3;J3KTJ1	P19105;J3QRS3	13;13;6	1;1;1	1;1;1	Myosin regulatory light chain 12A	MYL12A	>sp|P19105|ML12A_HUMAN Myosin regulatory light chain 12A OS=Homo sapiens GN=MYL12A PE=1 SV=2;>tr|J3QRS3|J3QRS3_HUMAN Myosin regulatory light chain 12A OS=Homo sapiens GN=MYL12A PE=4 SV=1	3	13	1	1	8	13	0	1	0	1	84.2	17.5	17.5	19.794	171	171;177;114	7							7					7	7.5137e-257	0.65227	0.71108	6.7818	7	NaN	NaN	#VALUE!	NaN	0	0.65227	0.71108	0.491916
Q9UNF1;Q5H909;Q9UNF1-2;H7BXW3;Q5H907;G5E999;B1AKF1;G5E9N2;Q12816-2;Q9Y5V3;Q9Y5V3-2;F5GY27;B1AKE9;Q12816	Q9UNF1;Q5H909;Q9UNF1-2;H7BXW3;Q5H907	13;12;12;12;8;1;1;1;1;1;1;1;1;1	13;12;12;12;8;1;1;1;1;1;1;1;1;1	13;12;12;12;8;1;1;1;1;1;1;1;1;1	Melanoma-associated antigen D2	MAGED2	>sp|Q9UNF1|MAGD2_HUMAN Melanoma-associated antigen D2 OS=Homo sapiens GN=MAGED2 PE=1 SV=2;>tr|Q5H909|Q5H909_HUMAN Melanoma-associated antigen D2 OS=Homo sapiens GN=MAGED2 PE=2 SV=1;>sp|Q9UNF1-2|MAGD2_HUMAN Isoform 2 of Melanoma-associated antigen D2 OS=Hom	14	13	13	13	8	8	8	8	8	8	27.7	27.7	27.7	64.953	606	606;550;588;588;521;284;309;681;706;778;834;962;1034;1431	4.72				15	9	3	2				19	10	6.007e-46	0.85831	1.1873	28.368	28	0.92916	1.2639	0.337882	14.585	19	0.64408	0.72898	0.456049
P48637;B7Z514;P48637-2	P48637;B7Z514;P48637-2	13;10;10	13;10;10	13;10;10	Glutathione synthetase	GSS	>sp|P48637|GSHB_HUMAN Glutathione synthetase OS=Homo sapiens GN=GSS PE=1 SV=1;>tr|B7Z514|B7Z514_HUMAN Glutathione synthetase OS=Homo sapiens GN=GSS PE=2 SV=1;>sp|P48637-2|GSHB_HUMAN Isoform 2 of Glutathione synthetase OS=Homo sapiens GN=GSS	3	13	13	13	6	11	6	11	6	11	35.7	35.7	35.7	52.384	474	474;346;363	5.15				9	18	11	2				12	28	2.1837e-108	0.71368	0.82878	35.52	37	0.80612	1.175	0.232661	20.78	9	0.66793	0.73365	0.446836
O15523;B4DXX7;B4E132;C9J8G5;C9J081	O15523;B4DXX7;B4E132	13;11;10;5;4	3;1;2;2;1	3;1;2;2;1	ATP-dependent RNA helicase DDX3Y	DDX3Y	>sp|O15523|DDX3Y_HUMAN ATP-dependent RNA helicase DDX3Y OS=Homo sapiens GN=DDX3Y PE=1 SV=2;>tr|B4DXX7|B4DXX7_HUMAN Uncharacterized protein OS=Homo sapiens GN=DDX3Y PE=2 SV=1;>tr|B4E132|B4E132_HUMAN Uncharacterized protein OS=Homo sapiens GN=DDX3Y PE=2 SV=1	5	13	3	3	7	10	3	1	3	1	22.4	7	7	73.153	660	660;657;407;224;250	4.44				5	4						8	1	1.4394e-76	0.88685	1.1259	21.185	9	0.88733	1.1348	0.182438	17.203	8	0.63107	0.73724	0.439794
P51149;C9J8S3;C9J4V0;C9J4S4;C9J592;C9IZZ0;C9J7D1	P51149;C9J8S3;C9J4V0;C9J4S4;C9J592;C9IZZ0	13;11;9;8;8;7;4	13;11;9;8;8;7;4	13;11;9;8;8;7;4	Ras-related protein Rab-7a	RAB7A	>sp|P51149|RAB7A_HUMAN Ras-related protein Rab-7a OS=Homo sapiens GN=RAB7A PE=1 SV=1;>tr|C9J8S3|C9J8S3_HUMAN Ras-related protein Rab-7a OS=Homo sapiens GN=RAB7A PE=2 SV=1;>tr|C9J4V0|C9J4V0_HUMAN Ras-related protein Rab-7a OS=Homo sapiens GN=RAB7A PE=2 SV=1	7	13	13	13	3	13	3	13	3	13	64.3	64.3	64.3	23.489	207	207;160;134;98;150;116;91	6.82					1	9	19	5			5	29	7.4756e-104	0.71227	0.77312	19.356	34	0.85465	1.1865	0.246712	6.2627	5	0.69581	0.75824	0.399274
E5RJ68;O00203;H0YBD0;B7ZKR7;Q13367;B7ZKS0;F5GWU4	E5RJ68;O00203	13;13;2;2;2;2;1	13;13;2;2;2;2;1	13;13;2;2;2;2;1	AP-3 complex subunit beta-1	AP3B1	>tr|E5RJ68|E5RJ68_HUMAN AP-3 complex subunit beta-1 OS=Homo sapiens GN=AP3B1 PE=2 SV=1;>sp|O00203|AP3B1_HUMAN AP-3 complex subunit beta-1 OS=Homo sapiens GN=AP3B1 PE=1 SV=3	7	13	13	13	1	13	1	13	1	13	15	15	15	116.19	1045	1045;1094;154;1050;1082;1101;193	3.3			16	7							1	22	1.8117e-44	0.66089	0.78398	14.554	23	0.62887	0.78398	-0.351111	NaN	1	0.66718	0.79049	0.339181
P13804-2;P13804;H0YK49;H0YLU7;H0YNX6;H0YL12;H0YKF0;H0YL83;H0YM12	P13804-2;P13804;H0YK49;H0YLU7;H0YNX6;H0YL12	13;13;11;11;10;8;6;5;2	13;13;11;11;10;8;6;5;2	13;13;11;11;10;8;6;5;2	Electron transfer flavoprotein subunit alpha, mitochondrial	ETFA	>sp|P13804-2|ETFA_HUMAN Isoform 2 of Electron transfer flavoprotein subunit alpha, mitochondrial OS=Homo sapiens GN=ETFA;>sp|P13804|ETFA_HUMAN Electron transfer flavoprotein subunit alpha, mitochondrial OS=Homo sapiens GN=ETFA PE=1 SV=1;>tr|H0YK49|H0YK49_H	9	13	13	13	3	11	3	11	3	11	60.2	60.2	60.2	30.025	284	284;333;229;303;254;240;289;73;39	6.42					1	16	14				4	27	8.5728e-113	0.73963	0.80328	17.695	31	0.84894	1.242	0.312665	14.941	4	0.72657	0.79148	0.337375
Q14247-3;Q14247;Q14247-2;H7C314;B4E358;H0YCD9;E9PKG3;E9PP90;H0YEV2	Q14247-3;Q14247;Q14247-2	13;13;12;5;4;3;2;2;2	13;13;12;5;4;3;2;2;2	13;13;12;5;4;3;2;2;2	Src substrate cortactin	CTTN	>sp|Q14247-3|SRC8_HUMAN Isoform 3 of Src substrate cortactin OS=Homo sapiens GN=CTTN;>sp|Q14247|SRC8_HUMAN Src substrate cortactin OS=Homo sapiens GN=CTTN PE=1 SV=2;>sp|Q14247-2|SRC8_HUMAN Isoform 2 of Src substrate cortactin OS=Homo sapiens GN=CTTN	9	13	13	13	5	8	5	8	5	8	32.9	32.9	32.9	57.466	513	513;550;634;223;314;265;51;76;128	4.25				15	5						11	9	5.1603e-84	0.80076	1.0149	20.206	18	0.89221	1.1051	0.144177	15.933	10	0.69799	0.80591	0.311309
Q9UNZ2;Q9UNZ2-5;J3QK90;Q9UNZ2-4;Q9UNZ2-6;F2Z2K0	Q9UNZ2;Q9UNZ2-5;J3QK90;Q9UNZ2-4;Q9UNZ2-6;F2Z2K0	13;13;13;12;10;8	13;13;13;12;10;8	13;13;13;12;10;8	NSFL1 cofactor p47	NSFL1C	>sp|Q9UNZ2|NSF1C_HUMAN NSFL1 cofactor p47 OS=Homo sapiens GN=NSFL1C PE=1 SV=2;>sp|Q9UNZ2-5|NSF1C_HUMAN Isoform 3 of NSFL1 cofactor p47 OS=Homo sapiens GN=NSFL1C;>tr|J3QK90|J3QK90_HUMAN NSFL1 cofactor p47 OS=Homo sapiens GN=NSFL1C PE=4 SV=1;>sp|Q9UNZ2-4|NSF	6	13	13	13	10	9	10	9	10	9	42.4	42.4	42.4	40.572	370	370;372;372;339;259;274	5.73					20	17	8				31	14	1.3371e-95	0.80025	1.0659	22.625	45	0.81429	1.1053	0.144438	13.876	31	0.72792	0.809	0.305788
P51610-2;P51610;P51610-4;A6NEM2;P51610-3;H7C1C4	P51610-2;P51610;P51610-4;A6NEM2	13;13;13;13;4;1	13;13;13;13;4;1	13;13;13;13;4;1	Host cell factor 1;HCF N-terminal chain 1;HCF N-terminal chain 2;HCF N-terminal chain 3;HCF N-terminal chain 4;HCF N-terminal chain 5;HCF N-terminal chain 6;HCF C-terminal chain 1;HCF C-terminal chain 2;HCF C-terminal chain 3;HCF C-terminal chain 4;HCF C-terminal chain 5;HCF C-terminal chain 6	HCFC1	>sp|P51610-2|HCFC1_HUMAN Isoform 2 of Host cell factor 1 OS=Homo sapiens GN=HCFC1;>sp|P51610|HCFC1_HUMAN Host cell factor 1 OS=Homo sapiens GN=HCFC1 PE=1 SV=2;>sp|P51610-4|HCFC1_HUMAN Isoform 4 of Host cell factor 1 OS=Homo sapiens GN=HCFC1;>tr|A6NEM2|A6NE	6	13	13	13	8	11	8	11	8	11	9.6	9.6	9.6	201.85	1966	1966;2035;2079;2080;428;611	3.8	1	3	22	15	8	3	2				36	18	7.2425e-60	0.83221	1.0131	21.937	54	0.86715	1.083	0.115033	15.947	36	0.6738	0.80964	0.304648
Q9BU23-2;Q9BU23;Q9BU23-3	Q9BU23-2;Q9BU23;Q9BU23-3	13;13;12	13;13;12	13;13;12	Lipase maturation factor 2	LMF2	>sp|Q9BU23-2|LMF2_HUMAN Isoform 2 of Lipase maturation factor 2 OS=Homo sapiens GN=LMF2;>sp|Q9BU23|LMF2_HUMAN Lipase maturation factor 2 OS=Homo sapiens GN=LMF2 PE=1 SV=2;>sp|Q9BU23-3|LMF2_HUMAN Isoform 3 of Lipase maturation factor 2 OS=Homo sapiens GN=LM	3	13	13	13	3	13	3	13	3	13	26	26	26	76.914	682	682;707;594	1.89	13	17	7	1							9	29	2.9391e-100	0.70838	0.84232	18.47	37	0.85891	1.1332	0.180403	25.131	8	0.67158	0.83577	0.258822
P11413;P11413-3;P11413-2;E7EUI8;E9PD92;E7EM57	P11413;P11413-3;P11413-2;E7EUI8;E9PD92;E7EM57	13;13;13;8;7;7	13;13;13;8;7;7	13;13;13;8;7;7	Glucose-6-phosphate 1-dehydrogenase	G6PD	>sp|P11413|G6PD_HUMAN Glucose-6-phosphate 1-dehydrogenase OS=Homo sapiens GN=G6PD PE=1 SV=4;>sp|P11413-3|G6PD_HUMAN Isoform 3 of Glucose-6-phosphate 1-dehydrogenase OS=Homo sapiens GN=G6PD;>sp|P11413-2|G6PD_HUMAN Isoform Long of Glucose-6-phosphate 1-dehyd	6	13	13	13	1	13	1	13	1	13	32	32	32	59.256	515	515;545;561;339;256;320	5.04				5	14	4	1				1	23	2.8965e-43	0.77013	0.86025	14.762	24	0.76446	0.95801	-0.0618874	NaN	1	0.77547	0.85571	0.224806
P54577	P54577	13	13	13	Tyrosine--tRNA ligase, cytoplasmic	YARS	>sp|P54577|SYYC_HUMAN Tyrosine--tRNA ligase, cytoplasmic OS=Homo sapiens GN=YARS PE=1 SV=4	1	13	13	13	3	10	3	10	3	10	32.6	32.6	32.6	59.143	528	528	4.94				3	12	2					5	12	5.8997e-33	0.75199	0.88126	21.389	17	0.69811	0.94464	-0.0821635	20.067	5	0.78471	0.86902	0.202539
Q9Y2A7;Q9Y2A7-2	Q9Y2A7;Q9Y2A7-2	13;13	13;13	13;13	Nck-associated protein 1	NCKAP1	>sp|Q9Y2A7|NCKP1_HUMAN Nck-associated protein 1 OS=Homo sapiens GN=NCKAP1 PE=1 SV=1;>sp|Q9Y2A7-2|NCKP1_HUMAN Isoform 2 of Nck-associated protein 1 OS=Homo sapiens GN=NCKAP1	2	13	13	13	2	11	2	11	2	11	19	19	19	128.79	1128	1128;1134	3.41			13	9							3	19	1.1784e-43	0.75865	0.93244	18.932	22	0.79377	1.0298	0.0423642	5.3866	3	0.75567	0.87885	0.186311
P49411;H3BNU3	P49411	13;2	13;2	13;2	Elongation factor Tu, mitochondrial	TUFM	>sp|P49411|EFTU_HUMAN Elongation factor Tu, mitochondrial OS=Homo sapiens GN=TUFM PE=1 SV=2	2	13	13	13	6	12	6	12	6	12	37.2	37.2	37.2	49.541	452	452;101	5.64					15	19	2				8	28	1.3038e-78	0.82197	0.91548	13.214	36	0.81101	1.087	0.120352	9.3253	8	0.82361	0.88697	0.173043
B4DJV2;O75390;F8VRP1;F8VX68;H0YIC4;F8VPF9;F8VPA1;F8W1S4;F8W4S1;H0YH82;F8VZK9;F8VX07;F8VTT8;F8W642;F8VWQ5;F8VRI6;F8VR34;F8W0J2;F8VU34	B4DJV2;O75390	13;13;4;4;4;4;4;4;4;4;3;3;3;2;2;2;2;1;1	13;13;4;4;4;4;4;4;4;4;3;3;3;2;2;2;2;1;1	12;12;4;4;4;4;4;4;3;4;3;3;2;2;1;2;1;0;0	Citrate synthase;Citrate synthase, mitochondrial	CS	>tr|B4DJV2|B4DJV2_HUMAN Citrate synthase OS=Homo sapiens GN=CS PE=2 SV=1;>sp|O75390|CISY_HUMAN Citrate synthase, mitochondrial OS=Homo sapiens GN=CS PE=1 SV=2	19	13	13	12	5	12	5	12	4	11	46.6	46.6	44.6	50.431	453	453;466;118;120;123;141;144;157;178;190;81;114;149;66;132;140;146;75;142	5.64					20	20	4				13	31	8.1582e-73	0.8155	0.95713	20.661	44	0.79738	1.0849	0.117562	19.816	13	0.81798	0.88868	0.170264
Q9Y5K6	Q9Y5K6	13	13	13	CD2-associated protein	CD2AP	>sp|Q9Y5K6|CD2AP_HUMAN CD2-associated protein OS=Homo sapiens GN=CD2AP PE=1 SV=1	1	13	13	13	10	6	10	6	10	6	27.4	27.4	27.4	71.45	639	639	4.9			1	17	11	5	5				33	6	4.447e-35	0.77877	1.0035	18.015	39	0.77877	1.0143	0.0204844	13.03	33	0.77788	0.90352	0.146372
Q5JPE7-2;P69849;Q5JPE7;J3KN36;Q4G177;F5H826;Q15155;H3BPS9;H3BUC9	Q5JPE7-2;P69849;Q5JPE7;J3KN36;Q4G177;F5H826;Q15155	13;13;13;13;12;12;11;2;1	13;13;13;13;12;12;11;2;1	13;13;13;13;12;12;11;2;1	Nodal modulator 3;Nodal modulator 2;Nodal modulator 1	NOMO3;NOMO2;NOMO1	>sp|Q5JPE7-2|NOMO2_HUMAN Isoform 2 of Nodal modulator 2 OS=Homo sapiens GN=NOMO2;>sp|P69849|NOMO3_HUMAN Nodal modulator 3 OS=Homo sapiens GN=NOMO3 PE=2 SV=2;>sp|Q5JPE7|NOMO2_HUMAN Nodal modulator 2 OS=Homo sapiens GN=NOMO2 PE=1 SV=1;>tr|J3KN36|J3KN36_HUMAN	9	13	13	13	0	13	0	13	0	13	20.2	20.2	20.2	134.19	1222	1222;1222;1267;1267;1100;1100;1222;223;144	2.8	1	4	13	2								20	3.8199e-65	0.76891	0.91122	9.9696	20	NaN	NaN	#VALUE!	NaN	0	0.76891	0.91122	0.134129
Q7L014;D6RJA6	Q7L014	13;4	13;4	13;4	Probable ATP-dependent RNA helicase DDX46	DDX46	>sp|Q7L014|DDX46_HUMAN Probable ATP-dependent RNA helicase DDX46 OS=Homo sapiens GN=DDX46 PE=1 SV=2	2	13	13	13	5	11	5	11	5	11	13.7	13.7	13.7	117.36	1031	1031;471	3.08	1	1	17	5							9	15	6.1238e-50	0.78221	0.95324	18.747	24	0.7532	0.95904	-0.0603371	13.014	9	0.79679	0.91522	0.12781
B7Z8M7;P62820;P62820-2;E7END7;P62820-3;E7ETK2	B7Z8M7;P62820;P62820-2;E7END7;P62820-3;E7ETK2	13;13;11;11;8;7	13;13;11;11;8;7	6;6;6;6;5;4	Ras-related protein Rab-1A	RAB1A	>tr|B7Z8M7|B7Z8M7_HUMAN Ras-related protein Rab-1A OS=Homo sapiens GN=RAB1A PE=2 SV=1;>sp|P62820|RAB1A_HUMAN Ras-related protein Rab-1A OS=Homo sapiens GN=RAB1A PE=1 SV=3;>sp|P62820-2|RAB1A_HUMAN Isoform 2 of Ras-related protein Rab-1A OS=Homo sapiens GN=R	6	13	13	6	5	12	5	12	4	5	75.1	75.1	35.3	18.99	173	173;205;141;173;129;129	7.13	1					7	19	9		3	8	31	4.1316e-91	0.85392	0.94518	14.009	38	0.79383	1.0865	0.119688	13.778	8	0.86087	0.93147	0.102419
P42166;A2T926	P42166;A2T926	13;11	2;0	2;0	Lamina-associated polypeptide 2, isoform alpha;Thymopoietin;Thymopentin	TMPO	>sp|P42166|LAP2A_HUMAN Lamina-associated polypeptide 2, isoform alpha OS=Homo sapiens GN=TMPO PE=1 SV=2;>tr|A2T926|A2T926_HUMAN Thymopentin OS=Homo sapiens GN=TMPO PE=2 SV=1	2	13	2	2	11	8	0	2	0	2	28.4	9.1	9.1	75.491	694	694;248	4				2								2	9.2671e-82	0.78372	0.93772	9.6119	2	NaN	NaN	#VALUE!	NaN	0	0.78372	0.93772	0.0927709
E9PK01;P29692;E9PQ49;E9PI39;P29692-2;E9PRY8;E9PPR1;E9PL12;P29692-3;E9PMW7;E9PL71;E9PIZ1;H0YCK7;P29692-4;E9PN91;E9PQZ1;E9PK06;E9PK72;E9PKK3;E9PNW6;E9PJD0;H0YE58;H0YE72;E9PQC9	E9PK01;P29692;E9PQ49;E9PI39;P29692-2;E9PRY8;E9PPR1;E9PL12;P29692-3;E9PMW7;E9PL71;E9PIZ1;H0YCK7;P29692-4;E9PN91;E9PQZ1;E9PK06	13;13;12;12;12;12;11;11;11;10;10;9;9;9;8;8;7;6;5;3;3;2;2;1	13;13;12;12;12;12;11;11;11;10;10;9;9;9;8;8;7;6;5;3;3;2;2;1	12;12;11;11;11;11;11;11;10;10;9;9;9;8;8;7;7;6;5;3;3;1;1;1	Elongation factor 1-delta	EEF1D	>tr|E9PK01|E9PK01_HUMAN Elongation factor 1-delta (Fragment) OS=Homo sapiens GN=EEF1D PE=2 SV=1;>sp|P29692|EF1D_HUMAN Elongation factor 1-delta OS=Homo sapiens GN=EEF1D PE=1 SV=5;>tr|E9PQ49|E9PQ49_HUMAN Elongation factor 1-delta (Fragment) OS=Homo sapiens	24	13	13	12	11	10	11	10	10	10	50.2	50.2	46.4	28.821	261	261;281;199;204;647;697;166;168;257;130;187;137;210;262;106;238;140;63;39;35;99;119;156;36	6.19				1	8	22	15	2			24	24	1.6282e-88	0.76027	0.9533	36.42	46	0.70171	0.96899	-0.0454463	14.18	22	0.87314	0.94261	0.0852671
Q07666;Q07666-2;Q07666-3;Q5VWX1	Q07666;Q07666-2;Q07666-3	13;11;10;2	13;11;10;2	13;11;10;2	KH domain-containing, RNA-binding, signal transduction-associated protein 1	KHDRBS1	>sp|Q07666|KHDR1_HUMAN KH domain-containing, RNA-binding, signal transduction-associated protein 1 OS=Homo sapiens GN=KHDRBS1 PE=1 SV=1;>sp|Q07666-2|KHDR1_HUMAN Isoform 2 of KH domain-containing, RNA-binding, signal transduction-associated protein 1 OS=Hom	4	13	13	13	12	7	12	7	12	7	33.2	33.2	33.2	48.227	443	443;418;404;349	5.08			3	27	30	19	9	1			70	19	8.0248e-65	0.80175	1.0238	22.747	89	0.79727	1.0664	0.0927487	18.173	70	0.84552	0.94411	0.0829731
P49790;F6QR24	P49790;F6QR24	13;12	13;12	13;12	Nuclear pore complex protein Nup153	NUP153	>sp|P49790|NU153_HUMAN Nuclear pore complex protein Nup153 OS=Homo sapiens GN=NUP153 PE=1 SV=2;>tr|F6QR24|F6QR24_HUMAN Nuclear pore complex protein Nup153 OS=Homo sapiens GN=NUP153 PE=2 SV=1	2	13	13	13	10	5	10	5	10	5	14.2	14.2	14.2	153.94	1475	1475;1506	3.57		1	16	9	3	1					23	7	1.7929e-66	0.82391	1.0003	17.865	30	0.82389	1.0214	0.030548	18.779	23	0.8505	0.95531	0.0659591
Q9Y262-2;Q9Y262;B0QY89;B0QY90;C9JHP4;C9K0Q7;H7C3A0	Q9Y262-2;Q9Y262;B0QY89;B0QY90	13;13;13;9;4;4;3	13;13;13;9;4;4;3	13;13;13;9;4;4;3	Eukaryotic translation initiation factor 3 subunit L	EIF3L	>sp|Q9Y262-2|EIF3L_HUMAN Isoform 2 of Eukaryotic translation initiation factor 3 subunit L OS=Homo sapiens GN=EIF3L;>sp|Q9Y262|EIF3L_HUMAN Eukaryotic translation initiation factor 3 subunit L OS=Homo sapiens GN=EIF3L PE=1 SV=1;>tr|B0QY89|B0QY89_HUMAN Eukar	7	13	13	13	1	13	1	13	1	13	31.6	31.6	31.6	61.013	516	516;564;607;466;150;183;127	4.62			1	14	14	2	1				2	30	1.6093e-88	0.85696	0.968	45.465	32	1.0589	1.4643	0.550211	3.3979	2	0.85543	0.96337	0.0538381
P60228;E5RGA2;H0YBR5;E5RIT4;E5RHS5;H0YAW4;H0YBP5;E5RII3;E5RIP5;E5RJ25	P60228;E5RGA2	13;9;6;4;4;3;2;2;1;1	13;9;6;4;4;3;2;2;1;1	13;9;6;4;4;3;2;2;1;1	Eukaryotic translation initiation factor 3 subunit E	EIF3E	>sp|P60228|EIF3E_HUMAN Eukaryotic translation initiation factor 3 subunit E OS=Homo sapiens GN=EIF3E PE=1 SV=1;>tr|E5RGA2|E5RGA2_HUMAN Eukaryotic translation initiation factor 3 subunit E OS=Homo sapiens GN=EIF3E PE=2 SV=1	10	13	13	13	1	12	1	12	1	12	35.7	35.7	35.7	52.22	445	445;352;171;75;226;156;74;75;45;56	5.43					17	10	1				1	27	1.9218e-96	0.87654	0.97224	15.128	27	NaN	NaN	#VALUE!	NaN	0	0.87654	0.97224	0.0406156
E9PF10;O75694;O75694-2;D6RA13	E9PF10;O75694;O75694-2	13;13;12;1	13;13;12;1	13;13;12;1	Nuclear pore complex protein Nup155	NUP155	>tr|E9PF10|E9PF10_HUMAN Nuclear pore complex protein Nup155 OS=Homo sapiens GN=NUP155 PE=2 SV=1;>sp|O75694|NU155_HUMAN Nuclear pore complex protein Nup155 OS=Homo sapiens GN=NUP155 PE=1 SV=1;>sp|O75694-2|NU155_HUMAN Isoform 2 of Nuclear pore complex protei	4	13	13	13	1	13	1	13	1	13	14.4	14.4	14.4	148.09	1327	1327;1391;1332;54	2.84	1	2	15	1							1	18	5.8274e-99	0.82001	0.96912	25.628	19	0.74711	0.88513	-0.176039	NaN	1	0.83105	0.97301	0.0394735
Q9Y230;B3KQ59;M0R0Y3;M0R0Z0;M0QXI6;M0QXZ7	Q9Y230;B3KQ59;M0R0Y3	13;9;7;3;2;1	13;9;7;3;2;1	13;9;7;3;2;1	RuvB-like 2	RUVBL2	>sp|Q9Y230|RUVB2_HUMAN RuvB-like 2 OS=Homo sapiens GN=RUVBL2 PE=1 SV=3;>tr|B3KQ59|B3KQ59_HUMAN RuvB-like 2 OS=Homo sapiens GN=RUVBL2 PE=2 SV=1;>tr|M0R0Y3|M0R0Y3_HUMAN RuvB-like 2 OS=Homo sapiens GN=RUVBL2 PE=4 SV=1	6	13	13	13	2	12	2	12	2	12	34.8	34.8	34.8	51.156	463	463;418;354;50;109;39	5.24					14	2	1				5	12	2.5115e-68	0.83361	1.0513	10.981	17	0.80358	1.1332	0.180403	6.4331	5	0.88443	0.97677	0.0339092
Q96P70	Q96P70	13	13	13	Importin-9	IPO9	>sp|Q96P70|IPO9_HUMAN Importin-9 OS=Homo sapiens GN=IPO9 PE=1 SV=3	1	13	13	13	2	13	2	13	2	13	21.4	21.4	21.4	115.96	1041	1041	3.39			23	15							6	32	2.6498e-113	0.84248	0.99	13.28	37	0.78693	0.99073	-0.0134362	6.2995	6	0.85198	0.99	0.0144996
P54652	P54652	13	1	1	Heat shock-related 70 kDa protein 2	HSPA2	>sp|P54652|HSP72_HUMAN Heat shock-related 70 kDa protein 2 OS=Homo sapiens GN=HSPA2 PE=1 SV=1	1	13	1	1	8	12	0	1	0	1	17.8	2.2	2.2	70.02	639	639	4.5				1	1							2	1.429e-94	0.8985	0.99164	0.89148	2	NaN	NaN	#VALUE!	NaN	0	0.8985	0.99164	0.0121116
Q6NZI2;Q6NZI2-2;Q6NZI2-3	Q6NZI2;Q6NZI2-2	13;9;6	13;9;6	13;9;6	Polymerase I and transcript release factor	PTRF	>sp|Q6NZI2|PTRF_HUMAN Polymerase I and transcript release factor OS=Homo sapiens GN=PTRF PE=1 SV=1;>sp|Q6NZI2-2|PTRF_HUMAN Isoform 2 of Polymerase I and transcript release factor OS=Homo sapiens GN=PTRF	3	13	13	13	5	12	5	12	5	12	32.1	32.1	32.1	43.476	390	390;300;198	4.86			2	15	24	8	2				11	40	2.5035e-147	0.87732	1.0178	14.42	49	0.79533	1.094	0.129613	7.8483	11	0.90459	0.99993	0.000100992
Q08945;E9PMD4;E9PPZ7	Q08945	13;3;2	13;3;2	13;3;2	FACT complex subunit SSRP1	SSRP1	>sp|Q08945|SSRP1_HUMAN FACT complex subunit SSRP1 OS=Homo sapiens GN=SSRP1 PE=1 SV=1	3	13	13	13	3	11	3	11	3	11	24	24	24	81.074	709	709;192;154	4.27				17	4	1					9	13	4.2986e-86	0.79005	0.9335	14.138	22	0.67127	0.86474	-0.209662	12.126	9	0.88479	1.0346	-0.0490731
Q86UE4;E5RJU9;H0YB56;H0YBJ8	Q86UE4;E5RJU9	13;12;5;2	13;12;5;2	13;12;5;2	Protein LYRIC	MTDH	>sp|Q86UE4|LYRIC_HUMAN Protein LYRIC OS=Homo sapiens GN=MTDH PE=1 SV=2;>tr|E5RJU9|E5RJU9_HUMAN Protein LYRIC OS=Homo sapiens GN=MTDH PE=2 SV=1	4	13	13	13	12	3	12	3	12	3	26.5	26.5	26.5	63.836	582	582;526;224;188	4.67				17	12	3		1			30	3	1.8235e-61	0.6428	0.80746	20.317	33	0.63305	0.79682	-0.327674	14.149	30	0.89544	1.0447	-0.0630887
P40121;P40121-2;E7ENU9;B8ZZL6;H7C0X8	P40121;P40121-2;E7ENU9	13;11;10;5;3	13;11;10;5;3	13;11;10;5;3	Macrophage-capping protein	CAPG	>sp|P40121|CAPG_HUMAN Macrophage-capping protein OS=Homo sapiens GN=CAPG PE=1 SV=2;>sp|P40121-2|CAPG_HUMAN Isoform 2 of Macrophage-capping protein OS=Homo sapiens GN=CAPG;>tr|E7ENU9|E7ENU9_HUMAN Condensin complex subunit 3 (Fragment) OS=Homo sapiens GN=CAP	5	13	13	13	12	12	12	12	12	12	45.4	45.4	45.4	38.498	348	348;333;253;218;103	5.84					20	34	10				31	33	1.1272e-93	0.88343	0.97898	19.36	62	0.63747	0.87285	-0.196194	23.371	29	0.95589	1.0478	-0.0673634
P13674-3;P13674-2;P13674	P13674-3;P13674-2;P13674	13;13;13	13;13;13	13;13;13	Prolyl 4-hydroxylase subunit alpha-1	P4HA1	>sp|P13674-3|P4HA1_HUMAN Isoform 3 of Prolyl 4-hydroxylase subunit alpha-1 OS=Homo sapiens GN=P4HA1;>sp|P13674-2|P4HA1_HUMAN Isoform 2 of Prolyl 4-hydroxylase subunit alpha-1 OS=Homo sapiens GN=P4HA1;>sp|P13674|P4HA1_HUMAN Prolyl 4-hydroxylase subunit alph	3	13	13	13	4	10	4	10	4	10	28.9	28.9	28.9	58.957	516	516;534;534	4.82				6	14	2					5	17	1.9429e-69	0.93466	1.0343	37.672	20	0.68767	0.93357	-0.0991699	32.249	4	0.94331	1.0491	-0.0691522
P61254;J3QRI7;J3QQQ9;J3QQV1;J3KTJ8;J3QRC4;J3KSS0;J3KS10	P61254;J3QRI7;J3QQQ9;J3QQV1;J3KTJ8;J3QRC4	13;11;11;11;10;10;6;3	13;11;11;11;10;10;6;3	4;2;2;2;2;2;2;0	60S ribosomal protein L26	RPL26;KRBA2	>sp|P61254|RL26_HUMAN 60S ribosomal protein L26 OS=Homo sapiens GN=RPL26 PE=1 SV=1;>tr|J3QRI7|J3QRI7_HUMAN 60S ribosomal protein L26 (Fragment) OS=Homo sapiens GN=RPL26 PE=4 SV=1;>tr|J3QQQ9|J3QQQ9_HUMAN KRAB-A domain-containing protein 2 OS=Homo sapiens GN	8	13	13	4	11	10	11	10	4	3	55.2	55.2	13.8	17.258	145	145;107;107;110;97;135;63;63	7.34					1	8	23	16	3	2	25	28	7.2801e-34	0.8334	0.96202	20.806	49	0.61252	0.89157	-0.16558	11.943	24	1.0084	1.0775	-0.107688
P61313;E7EQV9;E7ENU7;E7EX53;P61313-2;E7ERA2	P61313;E7EQV9;E7ENU7	13;10;9;6;5;1	13;10;9;6;5;1	13;10;9;6;5;1	60S ribosomal protein L15;Ribosomal protein L15	RPL15	>sp|P61313|RL15_HUMAN 60S ribosomal protein L15 OS=Homo sapiens GN=RPL15 PE=1 SV=2;>tr|E7EQV9|E7EQV9_HUMAN Ribosomal protein L15 (Fragment) OS=Homo sapiens GN=RPL15 PE=2 SV=1;>tr|E7ENU7|E7ENU7_HUMAN Ribosomal protein L15 (Fragment) OS=Homo sapiens GN=RPL15	6	13	13	13	5	13	5	13	5	13	47.1	47.1	47.1	24.146	204	204;174;175;133;145;59	5.61	4	3	2	2	1	11	21	2			11	35	4.7595e-68	0.98073	1.0557	19.078	45	0.62851	0.89209	-0.164739	17.993	11	1.0292	1.0933	-0.128689
P62917;E9PKZ0;E9PKU4;G3V1A1;E9PP36	P62917;E9PKZ0;E9PKU4;G3V1A1;E9PP36	13;11;11;8;7	13;11;11;8;7	13;11;11;8;7	60S ribosomal protein L8	RPL8	>sp|P62917|RL8_HUMAN 60S ribosomal protein L8 OS=Homo sapiens GN=RPL8 PE=1 SV=2;>tr|E9PKZ0|E9PKZ0_HUMAN 60S ribosomal protein L8 (Fragment) OS=Homo sapiens GN=RPL8 PE=2 SV=1;>tr|E9PKU4|E9PKU4_HUMAN 60S ribosomal protein L8 (Fragment) OS=Homo sapiens GN=RPL	5	13	13	13	12	10	12	10	12	10	32.7	32.7	32.7	28.024	257	257;205;235;167;148	6.49					3	28	27	3			33	28	8.8172e-48	0.69502	0.97921	24.966	61	0.63906	0.92712	-0.109172	6.8329	33	1.0207	1.0949	-0.130799
P62750;H7BY10;K7ERT8;A8MUS3;K7EJV9;K7EMA7	P62750;H7BY10;K7ERT8;A8MUS3;K7EJV9	13;10;10;10;9;6	13;10;10;10;9;6	13;10;10;10;9;6	60S ribosomal protein L23a	RPL23A	>sp|P62750|RL23A_HUMAN 60S ribosomal protein L23a OS=Homo sapiens GN=RPL23A PE=1 SV=1;>tr|H7BY10|H7BY10_HUMAN 60S ribosomal protein L23a (Fragment) OS=Homo sapiens GN=RPL23A PE=3 SV=1;>tr|K7ERT8|K7ERT8_HUMAN 60S ribosomal protein L23a (Fragment) OS=Homo sa	6	13	13	13	11	10	11	10	11	10	44.9	44.9	44.9	17.695	156	156;158;175;194;170;70	7.31						5	30	19		1	27	28	3.6131e-53	0.80039	0.97608	33.781	55	0.64639	0.91868	-0.122366	11.215	27	1.0915	1.1653	-0.220701
I3L0N3;P46459;B4DFA2;I3L2G1;K7EQD6;I3L0L3;I3L338;I3L4Q9	I3L0N3;P46459;B4DFA2	13;13;12;3;3;2;1;1	13;13;12;3;3;2;1;1	13;13;12;3;3;2;1;1	Vesicle-fusing ATPase	NSF	>tr|I3L0N3|I3L0N3_HUMAN Vesicle-fusing ATPase OS=Homo sapiens GN=NSF PE=2 SV=1;>sp|P46459|NSF_HUMAN Vesicle-fusing ATPase OS=Homo sapiens GN=NSF PE=1 SV=3;>tr|B4DFA2|B4DFA2_HUMAN Vesicle-fusing ATPase OS=Homo sapiens GN=NSF PE=2 SV=1	8	13	13	13	2	12	2	12	2	12	20.7	20.7	20.7	82.091	739	739;744;644;136;180;161;44;81	4.24			1	14	6						3	18	4.3787e-76	1.0514	1.1661	22.545	20	0.60938	0.82614	-0.275542	4.764	3	1.0918	1.1847	-0.244522
C9J9K3;P08865;A6NE09;C9JQR9	C9J9K3;P08865;A6NE09	13;13;9;3	13;13;9;3	13;13;9;3	40S ribosomal protein SA	RPSA;RPSAP58	>tr|C9J9K3|C9J9K3_HUMAN 40S ribosomal protein SA (Fragment) OS=Homo sapiens GN=RPSA PE=2 SV=1;>sp|P08865|RSSA_HUMAN 40S ribosomal protein SA OS=Homo sapiens GN=RPSA PE=1 SV=4;>tr|A6NE09|A6NE09_HUMAN 40S ribosomal protein SA OS=Homo sapiens GN=RPSAP58 PE=2	4	13	13	13	5	12	5	12	5	12	60.6	60.6	60.6	29.505	264	264;295;295;73	5.5				6	25	25	6				14	48	1.0578e-107	1.0456	1.1337	26.183	62	0.51697	0.73002	-0.453992	16.993	14	1.0849	1.2076	-0.272143
B4DLN1;B4E1E9;Q9UBX3;Q9UBX3-2;I3L1E8	B4DLN1	13;6;6;6;2	13;6;6;6;2	6;6;6;6;2		SLC25A10	>tr|B4DLN1|B4DLN1_HUMAN Mitochondrial dicarboxylate carrier OS=Homo sapiens GN=SLC25A10 PE=2 SV=1	5	13	13	6	5	10	5	10	0	6	38.9	38.9	17.6	48.099	442	442;244;287;296;113	6.88						7	14	4			9	16	1.407e-64	1.0166	1.136	18.294	25	0.63545	0.9151	-0.127999	5.9481	9	1.0702	1.2222	-0.28948
P52209;F5H7U0;B4DQJ8;K7EMN2;K7EM49;K7EPF6;K7ELN9	P52209;F5H7U0;B4DQJ8	13;12;12;6;6;5;3	13;12;12;6;6;5;3	13;12;12;6;6;5;3	6-phosphogluconate dehydrogenase, decarboxylating	PGD	>sp|P52209|6PGD_HUMAN 6-phosphogluconate dehydrogenase, decarboxylating OS=Homo sapiens GN=PGD PE=1 SV=3;>tr|F5H7U0|F5H7U0_HUMAN 6-phosphogluconate dehydrogenase, decarboxylating OS=Homo sapiens GN=PGD PE=2 SV=1;>tr|B4DQJ8|B4DQJ8_HUMAN 6-phosphogluconate d	7	13	13	13	3	13	3	13	3	13	36.2	36.2	36.2	53.139	483	483;461;470;160;205;256;224	5.61					15	16	2				4	29	4.5944e-100	1.0954	1.243	21.108	32	0.51673	0.70545	-0.503384	10.838	4	1.1196	1.2623	-0.336055
O15145;C9JZD1;F8VR50	O15145	13;6;4	13;6;4	13;6;4	Actin-related protein 2/3 complex subunit 3	ARPC3	>sp|O15145|ARPC3_HUMAN Actin-related protein 2/3 complex subunit 3 OS=Homo sapiens GN=ARPC3 PE=1 SV=3	3	13	13	13	5	11	5	11	5	11	65.2	65.2	65.2	20.546	178	178;99;84	7.62						1	17	10	1	3	9	23	1.7476e-66	1.1494	1.2987	22.697	32	0.63073	0.87443	-0.193585	15.602	9	1.175	1.3245	-0.405448
P54819-2;F8W1A4;P54819;P54819-5;F8VZG5;P54819-6;P54819-3;F8VY04;P54819-4;G3V213;F8VPP1	P54819-2;F8W1A4;P54819;P54819-5;F8VZG5;P54819-6;P54819-3;F8VY04;P54819-4;G3V213	13;13;13;11;10;10;10;9;7;7;2	13;13;13;11;10;10;10;9;7;7;2	13;13;13;11;10;10;10;9;7;7;2	Adenylate kinase 2, mitochondrial	AK2	>sp|P54819-2|KAD2_HUMAN Isoform 2 of Adenylate kinase 2, mitochondrial OS=Homo sapiens GN=AK2;>tr|F8W1A4|F8W1A4_HUMAN Adenylate kinase 2, mitochondrial OS=Homo sapiens GN=AK2 PE=2 SV=1;>sp|P54819|KAD2_HUMAN Adenylate kinase 2, mitochondrial OS=Homo sapiens	11	13	13	13	10	8	10	8	10	8	58.6	58.6	58.6	25.614	232	232;232;239;224;162;192;202;190;131;133;42	6.64						13	23				22	14	3.354e-67	0.6249	0.87193	29.404	36	0.56498	0.80336	-0.315881	17.478	22	1.1728	1.3324	-0.414027
Q9HB71;Q9HB71-3;B2ZWH1;Q9HB71-2	Q9HB71;Q9HB71-3	13;9;4;4	13;9;4;4	13;9;4;4	Calcyclin-binding protein	CACYBP	>sp|Q9HB71|CYBP_HUMAN Calcyclin-binding protein OS=Homo sapiens GN=CACYBP PE=1 SV=2;>sp|Q9HB71-3|CYBP_HUMAN Isoform 3 of Calcyclin-binding protein OS=Homo sapiens GN=CACYBP	4	13	13	13	6	11	6	11	6	11	69.3	69.3	69.3	26.21	228	228;185;50;80	6.55						17	21				11	27	3.3356e-65	1.124	1.268	34.114	38	0.53381	0.7609	-0.394221	31.831	11	1.2208	1.3406	-0.422879
A0AVT1;A0AVT1-2;H0Y8S8;A0AVT1-4;A0AVT1-3	A0AVT1;A0AVT1-2	13;9;4;4;4	13;9;4;4;4	13;9;4;4;4	Ubiquitin-like modifier-activating enzyme 6	UBA6	>sp|A0AVT1|UBA6_HUMAN Ubiquitin-like modifier-activating enzyme 6 OS=Homo sapiens GN=UBA6 PE=1 SV=1;>sp|A0AVT1-2|UBA6_HUMAN Isoform 2 of Ubiquitin-like modifier-activating enzyme 6 OS=Homo sapiens GN=UBA6	5	13	13	13	1	12	1	12	1	12	14.8	14.8	14.8	117.97	1052	1052;578;271;340;389	3.64			12	9				1			1	21	7.2027e-45	1.1647	1.3522	12.864	21	0.88384	1.2187	0.285343	NaN	1	1.1679	1.356	-0.439357
P52701;B4DF41;P52701-2;F5H2F9;F8W7G9;F8WAX8;C9JH55;C9J8Y8;C9J7Y7	P52701;B4DF41;P52701-2;F5H2F9	13;12;11;10;2;2;1;1;1	13;12;11;10;2;2;1;1;1	13;12;11;10;2;2;1;1;1	DNA mismatch repair protein Msh6	MSH6	>sp|P52701|MSH6_HUMAN DNA mismatch repair protein Msh6 OS=Homo sapiens GN=MSH6 PE=1 SV=2;>tr|B4DF41|B4DF41_HUMAN DNA mismatch repair protein Msh6 OS=Homo sapiens GN=MSH6 PE=2 SV=1;>sp|P52701-2|MSH6_HUMAN Isoform GTBP-alt of DNA mismatch repair protein Msh6	9	13	13	13	4	9	4	9	4	9	14.2	14.2	14.2	152.78	1360	1360;1230;1068;1058;104;160;101;116;151	3.05	1	2	14	5							10	12	2.215e-51	0.98134	1.1995	46.646	22	0.54627	0.64063	-0.642437	23.991	10	1.1806	1.4265	-0.51248
O95347;O95347-2;Q5T821	O95347;O95347-2	13;12;2	13;12;2	13;12;2	Structural maintenance of chromosomes protein 2	SMC2	>sp|O95347|SMC2_HUMAN Structural maintenance of chromosomes protein 2 OS=Homo sapiens GN=SMC2 PE=1 SV=2;>sp|O95347-2|SMC2_HUMAN Isoform 2 of Structural maintenance of chromosomes protein 2 OS=Homo sapiens GN=SMC2	3	13	13	13	2	11	2	11	2	11	12.9	12.9	12.9	135.65	1197	1197;1099;145	3.12		1	13	3							4	13	3.4543e-38	1.2572	1.464	38.73	17	0.52096	0.67437	-0.568388	4.3629	4	1.3056	1.5212	-0.60521
P52292;J3QLL0;J3KS65	P52292	13;5;5	13;5;5	13;5;5	Importin subunit alpha-2	KPNA2	>sp|P52292|IMA1_HUMAN Importin subunit alpha-1 OS=Homo sapiens GN=KPNA2 PE=1 SV=1	3	13	13	13	4	10	4	10	4	10	40.1	40.1	40.1	57.861	529	529;134;143	5.05				9	18	9	1				12	25	3.5452e-112	1.4646	1.6191	50.591	37	0.47743	0.65858	-0.602569	55.001	12	1.4853	1.7138	-0.777199
O75976;O75976-2;J3QRJ9	O75976;O75976-2	13;7;1	13;7;1	13;7;1	Carboxypeptidase D	CPD	>sp|O75976|CBPD_HUMAN Carboxypeptidase D OS=Homo sapiens GN=CPD PE=1 SV=2;>sp|O75976-2|CBPD_HUMAN Isoform 2 of Carboxypeptidase D OS=Homo sapiens GN=CPD	3	13	13	13	9	6	9	6	9	6	13.2	13.2	13.2	152.93	1380	1380;1133;82	3		2	16	2							12	8	5.3772e-34	0.48571	0.69587	79.412	20	0.37282	0.45331	-1.14143	28.813	12	1.8786	2.1955	-1.13455
B4E2V5;P27105;P27105-2	B4E2V5;P27105	12;12;4	12;12;4	12;12;4	Erythrocyte band 7 integral membrane protein	STOM	>tr|B4E2V5|B4E2V5_HUMAN Erythrocyte band 7 integral membrane protein OS=Homo sapiens GN=STOM PE=2 SV=1;>sp|P27105|STOM_HUMAN Erythrocyte band 7 integral membrane protein OS=Homo sapiens GN=STOM PE=1 SV=3	3	12	12	12	2	12	2	12	2	12	70.5	70.5	70.5	25.964	237	237;288;123	5.36	5	4	1		1	14	16	1			3	39	2.9821e-136	0.29027	0.35501	58.543	41	1.6384	2.2289	1.15633	37.732	3	0.28621	0.333	1.58641
P46063;F5H2L2;F8WA66;F8WD97;F5H4P4;F5H3W0;F5GYB7	P46063	12;3;3;3;2;2;1	12;3;3;3;2;2;1	12;3;3;3;2;2;1	ATP-dependent DNA helicase Q1	RECQL	>sp|P46063|RECQ1_HUMAN ATP-dependent DNA helicase Q1 OS=Homo sapiens GN=RECQL PE=1 SV=3	7	12	12	12	4	9	4	9	4	9	22.5	22.5	22.5	73.457	649	649;131;199;211;97;106;72	4.54			1	13	12	2					6	22	3.0563e-81	0.46938	0.54398	43.695	28	1.035	1.4662	0.552082	38.308	6	0.45804	0.52729	0.923331
Q15404;Q15404-2	Q15404;Q15404-2	12;11	12;11	12;11	Ras suppressor protein 1	RSU1	>sp|Q15404|RSU1_HUMAN Ras suppressor protein 1 OS=Homo sapiens GN=RSU1 PE=1 SV=3;>sp|Q15404-2|RSU1_HUMAN Isoform 2 of Ras suppressor protein 1 OS=Homo sapiens GN=RSU1	2	12	12	12	0	12	0	12	0	12	68.2	68.2	68.2	31.54	277	277;224	6.48						14	13					27	2.3174e-103	0.51502	0.58238	12.429	27	NaN	NaN	#VALUE!	NaN	0	0.51502	0.58238	0.779967
P20936-2;B4DTL2;E9PGC0;P20936;Q68CU6	P20936-2;B4DTL2;E9PGC0;P20936	12;12;12;12;2	12;12;12;12;2	12;12;12;12;2	Ras GTPase-activating protein 1	RASA1	>sp|P20936-2|RASA1_HUMAN Isoform 2 of Ras GTPase-activating protein 1 OS=Homo sapiens GN=RASA1;>tr|B4DTL2|B4DTL2_HUMAN Ras GTPase-activating protein 1 OS=Homo sapiens GN=RASA1 PE=2 SV=1;>tr|E9PGC0|E9PGC0_HUMAN Ras GTPase-activating protein 1 OS=Homo sapien	5	12	12	12	1	11	1	11	1	11	20.7	20.7	20.7	100.4	870	870;880;881;1047;539	3.45			11	9							2	18	1.1713e-82	0.56189	0.65946	33.694	20	1.1014	1.2952	0.373175	27.797	2	0.54571	0.63829	0.647716
P78347-2;P78347-4;P78347-3;P78347;Q86U51	P78347-2;P78347-4;P78347-3;P78347	12;12;12;12;1	12;12;12;12;1	12;12;12;12;1	General transcription factor II-I	GTF2I	>sp|P78347-2|GTF2I_HUMAN Isoform 2 of General transcription factor II-I OS=Homo sapiens GN=GTF2I;>sp|P78347-4|GTF2I_HUMAN Isoform 4 of General transcription factor II-I OS=Homo sapiens GN=GTF2I;>sp|P78347-3|GTF2I_HUMAN Isoform 3 of General transcription fa	5	12	12	12	1	11	1	11	1	11	20.9	20.9	20.9	107.97	957	957;977;978;998;274	3.25			13	2	1						3	13	1.0066e-52	0.55628	0.65493	26.839	16	0.93853	1.1408	0.190046	12.387	3	0.54212	0.64032	0.643135
Q53SF7-4;Q53SF7-3;Q53SF7-2;Q53SF7;G8JL86;H7C1G2	Q53SF7-4;Q53SF7-3;Q53SF7-2;Q53SF7;G8JL86	12;12;12;12;12;1	12;12;12;12;12;1	12;12;12;12;12;1	Cordon-bleu protein-like 1	COBLL1	>sp|Q53SF7-4|COBL1_HUMAN Isoform 4 of Cordon-bleu protein-like 1 OS=Homo sapiens GN=COBLL1;>sp|Q53SF7-3|COBL1_HUMAN Isoform 3 of Cordon-bleu protein-like 1 OS=Homo sapiens GN=COBLL1;>sp|Q53SF7-2|COBL1_HUMAN Isoform 2 of Cordon-bleu protein-like 1 OS=Homo s	6	12	12	12	10	4	10	4	10	4	17.3	17.3	17.3	123.87	1128	1128;1166;1166;1204;1233;258	3.29			16	4	1						17	4	9.7329e-69	0.99616	1.1328	37.252	19	1.0195	1.2176	0.28404	34.302	15	0.53429	0.64752	0.627003
O60493;O60493-2;O60493-4;O60493-3	O60493;O60493-2;O60493-4;O60493-3	12;9;9;6	12;9;9;6	10;8;8;5	Sorting nexin-3	SNX3	>sp|O60493|SNX3_HUMAN Sorting nexin-3 OS=Homo sapiens GN=SNX3 PE=1 SV=3;>sp|O60493-2|SNX3_HUMAN Isoform 2 of Sorting nexin-3 OS=Homo sapiens GN=SNX3;>sp|O60493-4|SNX3_HUMAN Isoform 4 of Sorting nexin-3 OS=Homo sapiens GN=SNX3;>sp|O60493-3|SNX3_HUMAN Isofor	4	12	12	10	8	11	8	11	6	9	50.6	50.6	50.6	18.762	162	162;130;140;113	7.82							13	21	2	2	9	29	3.1296e-37	0.59873	0.67271	33.993	37	1.0436	1.4274	0.51339	21.259	9	0.58908	0.65619	0.607814
O60749;B4DEK4;D6RC15	O60749;B4DEK4	12;11;2	12;11;2	11;10;2	Sorting nexin-2	SNX2	>sp|O60749|SNX2_HUMAN Sorting nexin-2 OS=Homo sapiens GN=SNX2 PE=1 SV=2;>tr|B4DEK4|B4DEK4_HUMAN Sorting nexin-2 OS=Homo sapiens GN=SNX2 PE=2 SV=1	3	12	12	11	3	10	3	10	3	9	28.7	28.7	26.8	58.47	519	519;402;266	4.39				15	7	1					9	14	5.3753e-78	0.66638	0.80771	35.462	22	0.98108	1.295	0.372952	14.862	9	0.59976	0.66753	0.583095
Q8WW12;Q8WW12-3;Q8WW12-2	Q8WW12;Q8WW12-3;Q8WW12-2	12;6;6	12;6;6	12;6;6	PEST proteolytic signal-containing nuclear protein	PCNP	>sp|Q8WW12|PCNP_HUMAN PEST proteolytic signal-containing nuclear protein OS=Homo sapiens GN=PCNP PE=1 SV=2;>sp|Q8WW12-3|PCNP_HUMAN Isoform 3 of PEST proteolytic signal-containing nuclear protein OS=Homo sapiens GN=PCNP;>sp|Q8WW12-2|PCNP_HUMAN Isoform 2 of	3	12	12	12	11	7	11	7	11	7	60.7	60.7	60.7	18.925	178	178;55;130	6.79						7	21	1			15	14	3.8706e-48	0.86321	1.0403	35.394	27	0.95766	1.3915	0.476641	11.081	14	0.60866	0.68998	0.535374
Q12959-5;Q12959-3;Q12959-6;Q12959-4;Q12959;Q12959-7;Q12959-2;Q12959-8;Q12959-9;E7EQD7;B4E2H8;C9IYP1;H7C166;C9JN61;C9JCP6;A8MUT6;C9J110;F2Z2L0;C9JUA9;A8MUT9;C9JWP9;C9JYG3;O14909;Q6ZSU2;P78352-3;P78352;Q15700-3;P78352-2;B7Z264;E9PIW2;B7Z2T4;E9PN83;Q15700;Q15700-4;Q15700-2	Q12959-5;Q12959-3;Q12959-6;Q12959-4;Q12959;Q12959-7;Q12959-2;Q12959-8;Q12959-9;E7EQD7	12;12;12;12;12;12;12;10;10;9;5;3;3;2;2;2;1;1;1;1;1;1;1;1;1;1;1;1;1;1;1;1;1;1;1	12;12;12;12;12;12;12;10;10;9;5;3;3;2;2;2;1;1;1;1;1;1;1;1;1;1;1;1;1;1;1;1;1;1;1	12;12;12;12;12;12;12;10;10;9;5;3;3;2;2;2;1;1;1;1;1;1;1;1;1;1;1;1;1;1;1;1;1;1;1	Disks large homolog 1	DLG1	>sp|Q12959-5|DLG1_HUMAN Isoform 5 of Disks large homolog 1 OS=Homo sapiens GN=DLG1;>sp|Q12959-3|DLG1_HUMAN Isoform 3 of Disks large homolog 1 OS=Homo sapiens GN=DLG1;>sp|Q12959-6|DLG1_HUMAN Isoform 6 of Disks large homolog 1 OS=Homo sapiens GN=DLG1;>sp|Q12	35	12	12	12	3	11	3	11	3	11	23.8	23.8	23.8	95.165	853	853;871;891;893;904;917;926;788;800;658;370;122;286;154;179;208;36;106;123;232;234;281;296;552;721;724;749;767;791;811;852;866;870;909;975	3.25		1	13	6							5	15	3.5174e-47	0.62189	0.74235	28.219	20	0.95796	1.2533	0.325732	14.985	5	0.60813	0.7104	0.493297
O14964;O14964-2;I3L1E3;I3L1P5;I3L165;I3L2H4	O14964;O14964-2;I3L1E3	12;11;6;3;2;1	12;11;6;3;2;1	12;11;6;3;2;1	Hepatocyte growth factor-regulated tyrosine kinase substrate	HGS	>sp|O14964|HGS_HUMAN Hepatocyte growth factor-regulated tyrosine kinase substrate OS=Homo sapiens GN=HGS PE=1 SV=1;>sp|O14964-2|HGS_HUMAN Isoform 2 of Hepatocyte growth factor-regulated tyrosine kinase substrate OS=Homo sapiens GN=HGS;>tr|I3L1E3|I3L1E3_HUM	6	12	12	12	7	7	7	7	7	7	18.1	18.1	18.1	86.191	777	777;690;292;263;71;59	3.77			12	14	5						18	13	9.8121e-34	0.81686	1.0566	32.283	31	0.94276	1.2647	0.338795	22.552	18	0.64131	0.72747	0.45904
Q13177;O75914-2;O75914;O75914-4;O75914-3;B1AKS5;H7C1X3;H0YCG5	Q13177	12;3;3;3;3;2;2;1	12;3;3;3;3;2;2;1	10;1;1;1;1;1;1;0	Serine/threonine-protein kinase PAK 2;PAK-2p27;PAK-2p34	PAK2	>sp|Q13177|PAK2_HUMAN Serine/threonine-protein kinase PAK 2 OS=Homo sapiens GN=PAK2 PE=1 SV=3	8	12	12	10	10	6	10	6	9	4	30	30	25	58.042	524	524;544;559;565;580;181;221;244	5.06				7	17	5	2				19	12	6.2593e-51	0.86393	1.1501	36.275	31	0.9192	1.3008	0.379399	34.504	19	0.64311	0.73614	0.441948
P20340-2;P20340;P20340-4;H0YGL6;P20340-3;H7BYW1;F5H3K7;F5GX61;Q9NRW1;J3KR73;B7Z337;C9JB90;C9JU14;C9J0I2	P20340-2;P20340;P20340-4;H0YGL6;P20340-3;H7BYW1;F5H3K7	12;12;9;9;7;7;6;4;4;3;3;2;2;1	12;12;9;9;7;7;6;4;4;3;3;2;2;1	11;11;8;8;7;6;6;4;3;2;2;1;1;1	Ras-related protein Rab-6A	RAB6A	>sp|P20340-2|RAB6A_HUMAN Isoform 2 of Ras-related protein Rab-6A OS=Homo sapiens GN=RAB6A;>sp|P20340|RAB6A_HUMAN Ras-related protein Rab-6A OS=Homo sapiens GN=RAB6A PE=1 SV=3;>sp|P20340-4|RAB6A_HUMAN Isoform 4 of Ras-related protein Rab-6A OS=Homo sapiens	14	12	12	11	0	12	0	12	0	11	47.6	47.6	42.3	23.548	208	208;208;175;201;104;174;71;87;208;124;195;49;83;71	6.71					1	3	13					17	6.004e-52	0.69282	0.74218	16.244	17	NaN	NaN	#VALUE!	NaN	0	0.69282	0.74218	0.430159
Q96AC1-2;Q96AC1;Q96AC1-3;H0YJ34;G3V3J0;H0YJB6;G3V5R2;G3V281;G3V1L6;Q9BQL6-4;Q9BQL6-2;Q9BQL6	Q96AC1-2;Q96AC1;Q96AC1-3;H0YJ34	12;12;12;11;4;1;1;1;1;1;1;1	12;12;12;11;4;1;1;1;1;1;1;1	12;12;12;11;4;1;1;1;1;1;1;1	Fermitin family homolog 2	FERMT2	>sp|Q96AC1-2|FERM2_HUMAN Isoform 2 of Fermitin family homolog 2 OS=Homo sapiens GN=FERMT2;>sp|Q96AC1|FERM2_HUMAN Fermitin family homolog 2 OS=Homo sapiens GN=FERMT2 PE=1 SV=1;>sp|Q96AC1-3|FERM2_HUMAN Isoform 3 of Fermitin family homolog 2 OS=Homo sapiens G	12	12	12	12	2	11	2	11	2	11	31	31	31	72.397	633	633;680;687;640;155;133;133;153;420;495;554;677	2.59	13	9	8	11	3						4	40	5.7262e-84	0.64222	0.77284	21.239	44	1.0178	1.3701	0.454281	14.937	4	0.63551	0.75937	0.397125
P28482;A8CZ64	P28482;A8CZ64	12;10	12;10	10;8	Mitogen-activated protein kinase 1	MAPK1	>sp|P28482|MK01_HUMAN Mitogen-activated protein kinase 1 OS=Homo sapiens GN=MAPK1 PE=1 SV=3;>tr|A8CZ64|A8CZ64_HUMAN Extracellular signal-regulated kinase-2 splice variant OS=Homo sapiens GN=MAPK1 PE=2 SV=1	2	12	12	10	3	12	3	12	3	10	48.1	48.1	42.8	41.389	360	360;316	5.84					10	17	5				6	26	1.6936e-62	0.6902	0.78718	26.124	32	0.88103	1.1966	0.258941	15.66	6	0.66388	0.75958	0.396726
P09382;F8WEI7	P09382	12;3	12;3	12;3	Galectin-1	LGALS1	>sp|P09382|LEG1_HUMAN Galectin-1 OS=Homo sapiens GN=LGALS1 PE=1 SV=2	2	12	12	12	7	12	7	12	7	12	95.6	95.6	95.6	14.716	135	135;38	8.3	1					2	14	34	11	19	21	60	1.438e-103	0.70212	0.79053	28.871	79	0.96389	1.312	0.391768	19.794	21	0.67669	0.76102	0.393994
Q9UJU6;Q9UJU6-2;B4DDD6;B4DEM2;H0Y5J4;B4DDP6;Q9UJU6-3;C9J7P1;F8WBG8;F2Z2V3;F8WB73;F8WCK3;F2Z3E3;F8WC20;F8WBB2;F8WFE1;H7C111	Q9UJU6;Q9UJU6-2;B4DDD6;B4DEM2;H0Y5J4;B4DDP6;Q9UJU6-3;C9J7P1	12;11;10;9;9;9;9;8;3;1;1;1;1;1;1;1;1	12;11;10;9;9;9;9;8;3;1;1;1;1;1;1;1;1	12;11;10;9;9;9;9;8;3;1;1;1;1;1;1;1;1	Drebrin-like protein	DBNL	>sp|Q9UJU6|DBNL_HUMAN Drebrin-like protein OS=Homo sapiens GN=DBNL PE=1 SV=1;>sp|Q9UJU6-2|DBNL_HUMAN Isoform 2 of Drebrin-like protein OS=Homo sapiens GN=DBNL;>tr|B4DDD6|B4DDD6_HUMAN Drebrin-like protein OS=Homo sapiens GN=DBNL PE=2 SV=1;>tr|B4DEM2|B4DEM2_	17	12	12	12	8	8	8	8	8	8	32.1	32.1	32.1	48.207	430	430;431;406;327;359;382;439;336;128;27;31;40;48;50;62;87;138	5.25				5	17	7	3				19	13	2.7506e-88	0.76957	1.0708	26.227	30	0.81268	1.1534	0.205893	17.339	19	0.67651	0.76335	0.389583
H3BS10;P06865;H3BP20;E9PGL4;H3BU85;H3BTD4;B4DKE7	H3BS10;P06865;H3BP20;E9PGL4;H3BU85;H3BTD4	12;12;12;9;7;7;4	12;12;12;9;7;7;4	12;12;12;9;7;7;4	Beta-hexosaminidase;Beta-hexosaminidase subunit alpha	HEXA	>tr|H3BS10|H3BS10_HUMAN Beta-hexosaminidase OS=Homo sapiens GN=HEXA PE=2 SV=1;>sp|P06865|HEXA_HUMAN Beta-hexosaminidase subunit alpha OS=Homo sapiens GN=HEXA PE=1 SV=2;>tr|H3BP20|H3BP20_HUMAN Beta-hexosaminidase OS=Homo sapiens GN=HEXA PE=2 SV=1;>tr|E9PGL4	7	12	12	12	1	12	1	12	1	12	27.9	27.9	27.9	58.44	509	509;529;540;301;318;373;168	5.11				8	13	4	2	1			1	27	6.336e-101	0.7153	0.78922	40.013	27	0.71801	0.95165	-0.071497	NaN	1	0.71065	0.78525	0.348776
P08572;A2A352	P08572	12;1	12;1	12;1	Collagen alpha-2(IV) chain;Canstatin	COL4A2	>sp|P08572|CO4A2_HUMAN Collagen alpha-2(IV) chain OS=Homo sapiens GN=COL4A2 PE=1 SV=4	2	12	12	12	11	4	11	4	11	4	12.9	12.9	12.9	167.55	1712	1712;105	2.9	2	6	15	5	1						20	9	5.9441e-34	1.0036	1.2468	50.634	28	1.0905	1.3951	0.480369	43.67	19	0.66662	0.78735	0.344923
Q99733;F5HFY4;C9JZI7;C9J6D1;E9PNW0;E9PJJ2;E9PS34;E9PNJ7;A8MXH2;E9PKT8;E9PP22;E9PKI2;H0YCI4;C9J1B1	Q99733;F5HFY4;C9JZI7;C9J6D1;E9PNW0;E9PJJ2;E9PS34;E9PNJ7;A8MXH2;E9PKT8	12;12;10;9;8;8;8;8;8;7;5;4;4;3	12;12;10;9;8;8;8;8;8;7;5;4;4;3	10;10;8;7;6;6;6;6;6;5;5;4;4;3	Nucleosome assembly protein 1-like 4	NAP1L4;NAP1L4b	>sp|Q99733|NP1L4_HUMAN Nucleosome assembly protein 1-like 4 OS=Homo sapiens GN=NAP1L4 PE=1 SV=1;>tr|F5HFY4|F5HFY4_HUMAN Nucleosome assembly protein 1-like 4 OS=Homo sapiens GN=NAP1L4b PE=2 SV=1;>tr|C9JZI7|C9JZI7_HUMAN Nucleosome assembly protein 1-like 4 (	14	12	12	10	6	12	6	12	5	10	39.5	39.5	36.8	42.823	375	375;386;278;178;107;128;133;140;156;169;154;78;204;101	5.1				15	23	8	6				21	31	3.6044e-99	0.76545	0.8976	28.503	51	0.90306	1.2331	0.30229	18.904	21	0.71402	0.78751	0.34463
Q9UBT2;B3KWB9;K7EPL2;K7ESK7;K7ES38	Q9UBT2;B3KWB9;K7EPL2	12;9;6;2;1	12;9;6;2;1	12;9;6;2;1	SUMO-activating enzyme subunit 2	UBA2	>sp|Q9UBT2|SAE2_HUMAN SUMO-activating enzyme subunit 2 OS=Homo sapiens GN=UBA2 PE=1 SV=2;>tr|B3KWB9|B3KWB9_HUMAN SUMO-activating enzyme subunit 2 OS=Homo sapiens GN=UBA2 PE=2 SV=1;>tr|K7EPL2|K7EPL2_HUMAN SUMO-activating enzyme subunit 2 (Fragment) OS=Homo	5	12	12	12	3	9	3	9	3	9	25.8	25.8	25.8	71.223	640	640;544;266;215;74	3.88			7	15	4						4	22	4.1761e-74	0.69378	0.80342	16.015	26	0.80276	1.0542	0.0761486	15.123	4	0.67915	0.79624	0.328725
Q9H223	Q9H223	12	9	8	EH domain-containing protein 4	EHD4	>sp|Q9H223|EHD4_HUMAN EH domain-containing protein 4 OS=Homo sapiens GN=EHD4 PE=1 SV=1	1	12	9	8	5	10	5	7	5	6	24.2	19.2	17.2	61.174	541	541	4.56				8	10						6	12	1.5302e-63	0.7701	0.90773	97.638	18	0.94245	1.2817	0.358059	19.487	6	0.71717	0.82698	0.274076
P61224-3;P61224;P61224-2;E7ESV4;F5H7Y6;A6NIZ1;F5GX62;P61224-4;F5H823;B7ZB78;F5GZG1;F5H004;F5H6R7;F5H4H0;F5GYH7;F5H077;F5GWU8;F5H491;F5H0B7;F5H500;F5GYB5;F8WBC0	P61224-3;P61224;P61224-2;E7ESV4;F5H7Y6;A6NIZ1;F5GX62;P61224-4;F5H823;B7ZB78;F5GZG1;F5H004;F5H6R7	12;12;10;10;10;10;9;9;8;8;8;7;6;4;4;4;4;4;4;4;4;2	12;12;10;10;10;10;9;9;8;8;8;7;6;4;4;4;4;4;4;4;4;2	3;3;1;3;3;3;2;3;3;3;3;2;2;0;0;0;0;0;0;0;0;0	Ras-related protein Rap-1b;Ras-related protein Rap-1b-like protein	RAP1B	>sp|P61224-3|RAP1B_HUMAN Isoform 3 of Ras-related protein Rap-1b OS=Homo sapiens GN=RAP1B;>sp|P61224|RAP1B_HUMAN Ras-related protein Rap-1b OS=Homo sapiens GN=RAP1B PE=1 SV=1;>sp|P61224-2|RAP1B_HUMAN Isoform 2 of Ras-related protein Rap-1b OS=Homo sapiens	22	12	12	3	5	12	5	12	1	3	59.4	59.4	17	18.778	165	165;184;137;157;179;184;139;142;103;118;122;127;122;48;53;85;87;93;98;101;136;32	7.26						7	18	7		3	5	30	6.9863e-56	0.76767	0.84805	18.078	35	0.88014	1.2361	0.305795	7.477	5	0.7541	0.82975	0.269251
P12268;H0Y4R1;E7ETK5	P12268;H0Y4R1	12;11;3	12;11;3	12;11;3	Inosine-5-monophosphate dehydrogenase 2	IMPDH2	>sp|P12268|IMDH2_HUMAN Inosine-5-monophosphate dehydrogenase 2 OS=Homo sapiens GN=IMPDH2 PE=1 SV=2;>tr|H0Y4R1|H0Y4R1_HUMAN Inosine-5-monophosphate dehydrogenase 2 (Fragment) OS=Homo sapiens GN=IMPDH2 PE=3 SV=1	3	12	12	12	0	12	0	12	0	12	36.4	36.4	36.4	55.804	514	514;470;279	4.93				8	16	6						30	5.7469e-67	0.744	0.8403	16.167	30	NaN	NaN	#VALUE!	NaN	0	0.744	0.8403	0.251024
Q13740-2;Q13740;F5GXJ9;H7C543;Q6ZS95	Q13740-2;Q13740;F5GXJ9	12;11;10;4;2	12;11;10;4;2	12;11;10;4;2	CD166 antigen	ALCAM	>sp|Q13740-2|CD166_HUMAN Isoform 2 of CD166 antigen OS=Homo sapiens GN=ALCAM;>sp|Q13740|CD166_HUMAN CD166 antigen OS=Homo sapiens GN=ALCAM PE=1 SV=2;>tr|F5GXJ9|F5GXJ9_HUMAN CD166 antigen OS=Homo sapiens GN=ALCAM PE=2 SV=1	5	12	12	12	7	7	7	7	7	7	30.4	30.4	30.4	63.664	570	570;583;532;344;305	4.07			8	15	1	1	1	1			12	15	1.0542e-57	0.79141	0.99844	58.502	27	0.7938	1.0122	0.0174944	51.711	12	0.76331	0.87167	0.198146
P40925;P40925-3;P40925-2;B9A041;B8ZZ51;C9JF79;C9JRL4;C9JLV6;C9IZI0;F8WFC2	P40925;P40925-3;P40925-2;B9A041;B8ZZ51;C9JF79	12;12;10;9;8;6;3;2;1;1	12;12;10;9;8;6;3;2;1;1	12;12;10;9;8;6;3;2;1;1	Malate dehydrogenase, cytoplasmic;Malate dehydrogenase	MDH1	>sp|P40925|MDHC_HUMAN Malate dehydrogenase, cytoplasmic OS=Homo sapiens GN=MDH1 PE=1 SV=4;>sp|P40925-3|MDHC_HUMAN Isoform 3 of Malate dehydrogenase, cytoplasmic OS=Homo sapiens GN=MDH1;>sp|P40925-2|MDHC_HUMAN Isoform 2 of Malate dehydrogenase, cytoplasmic	10	12	12	12	4	12	4	12	4	12	44.6	44.6	44.6	36.426	334	334;352;245;210;169;222;120;114;67;87	6.05					10	18	12				7	33	4.3212e-87	0.81382	0.89794	15.869	37	0.81382	1.1557	0.208767	10.152	5	0.81427	0.87192	0.197732
Q8N1F7;H3BVG0;Q8N1F7-2;H3BV11;H3BRI8;H3BM93;H3BRD9;H3BV15;H3BVE2;H3BMX0;H3BNN5;H3BP95;H3BPA9	Q8N1F7;H3BVG0;Q8N1F7-2	12;11;8;4;4;4;3;2;2;2;2;2;1	12;11;8;4;4;4;3;2;2;2;2;2;1	12;11;8;4;4;4;3;2;2;2;2;2;1	Nuclear pore complex protein Nup93	NUP93	>sp|Q8N1F7|NUP93_HUMAN Nuclear pore complex protein Nup93 OS=Homo sapiens GN=NUP93 PE=1 SV=2;>tr|H3BVG0|H3BVG0_HUMAN Nuclear pore complex protein Nup93 OS=Homo sapiens GN=NUP93 PE=2 SV=1;>sp|Q8N1F7-2|NUP93_HUMAN Isoform 2 of Nuclear pore complex protein Nu	13	12	12	12	1	12	1	12	1	12	22.1	22.1	22.1	93.487	819	819;880;696;136;151;178;140;84;117;125;132;156;230	3.65	1	1	1	14							2	15	1.3863e-91	0.75432	0.89012	23.661	17	1.0035	1.2985	0.376846	4.5402	2	0.75312	0.88503	0.176202
Q6P2E9-2;Q6P2E9;I3L2F4;I3L0V0;I3L3M2	Q6P2E9-2;Q6P2E9	12;12;3;1;1	12;12;3;1;1	12;12;3;1;1	Enhancer of mRNA-decapping protein 4	EDC4	>sp|Q6P2E9-2|EDC4_HUMAN Isoform 2 of Enhancer of mRNA-decapping protein 4 OS=Homo sapiens GN=EDC4;>sp|Q6P2E9|EDC4_HUMAN Enhancer of mRNA-decapping protein 4 OS=Homo sapiens GN=EDC4 PE=1 SV=1	5	12	12	12	8	7	8	7	8	7	22.3	22.3	22.3	109.73	1020	1020;1401;135;154;177	3.19	1	3	20	6	1	1					21	11	2.7632e-73	0.82967	1.0039	22.669	32	0.83501	1.0223	0.0318186	23.933	21	0.7434	0.90579	0.142751
P62826;B5MDF5;J3KQE5;F5H018;H0YFC6;B4DV51	P62826;B5MDF5;J3KQE5;F5H018;H0YFC6	12;12;11;10;8;3	12;12;11;10;8;3	12;12;11;10;8;3	GTP-binding nuclear protein Ran	RAN	>sp|P62826|RAN_HUMAN GTP-binding nuclear protein Ran OS=Homo sapiens GN=RAN PE=1 SV=3;>tr|B5MDF5|B5MDF5_HUMAN GTP-binding nuclear protein Ran OS=Homo sapiens GN=RAN PE=2 SV=1;>tr|J3KQE5|J3KQE5_HUMAN GTP-binding nuclear protein Ran (Fragment) OS=Homo sapien	6	12	12	12	7	11	7	11	7	11	42.1	42.1	42.1	24.423	216	216;233;234;199;103;128	5.36	7	5	4	2	7	14	23	4		1	11	56	2.6025e-67	0.83412	0.94084	21.672	67	0.78251	1.0429	0.0606008	23.428	11	0.84441	0.92117	0.118461
E9PLD0;Q9H0U4;Q92928;P59190-2;P59190	E9PLD0;Q9H0U4;Q92928	12;12;6;1;1	5;5;3;0;0	5;5;3;0;0	Ras-related protein Rab-1B;Putative Ras-related protein Rab-1C	RAB1B;RAB1C	>tr|E9PLD0|E9PLD0_HUMAN Ras-related protein Rab-1B OS=Homo sapiens GN=RAB1B PE=2 SV=1;>sp|Q9H0U4|RAB1B_HUMAN Ras-related protein Rab-1B OS=Homo sapiens GN=RAB1B PE=1 SV=1;>sp|Q92928|RAB1C_HUMAN Putative Ras-related protein Rab-1C OS=Homo sapiens GN=RAB1C P	5	12	5	5	3	12	2	5	2	5	71.6	30.8	30.8	18.483	169	169;201;201;208;212	6.8						5	8	2			3	12	3.0943e-122	0.81214	0.95592	8.1777	15	0.74752	1.0704	0.09815	4.2874	3	0.81315	0.9334	0.0994326
P84077;P61204;B7ZB63;F5H423;F5H0C7;H0YGG7	P84077;P61204;B7ZB63;F5H423	12;12;8;8;5;3	12;12;8;8;5;3	7;7;6;3;1;3	ADP-ribosylation factor 1;ADP-ribosylation factor 3	ARF1;ARF3	>sp|P84077|ARF1_HUMAN ADP-ribosylation factor 1 OS=Homo sapiens GN=ARF1 PE=1 SV=2;>sp|P61204|ARF3_HUMAN ADP-ribosylation factor 3 OS=Homo sapiens GN=ARF3 PE=1 SV=2;>tr|B7ZB63|B7ZB63_HUMAN ADP-ribosylation factor 3 OS=Homo sapiens GN=ARF3 PE=2 SV=1;>tr|F5H4	6	12	12	7	2	12	2	12	1	7	58.6	58.6	29.8	20.697	181	181;181;144;210;102;62	8.09						1	16	18	2	10	2	45	1.9332e-131	0.86224	0.95547	17.055	47	0.87281	1.1537	0.206268	25.49	2	0.86224	0.95515	0.0662008
Q13404;Q13404-8;Q13404-7;Q13404-2;Q13404-1;G3V2F7;Q13404-6;E5RIF1;D6RG00	Q13404;Q13404-8;Q13404-7;Q13404-2;Q13404-1;G3V2F7;Q13404-6	12;10;10;10;10;10;7;3;3	12;10;10;10;10;10;7;3;3	6;4;4;4;4;4;4;0;0	Ubiquitin-conjugating enzyme E2 variant 1	UBE2V1;TMEM189	>sp|Q13404|UB2V1_HUMAN Ubiquitin-conjugating enzyme E2 variant 1 OS=Homo sapiens GN=UBE2V1 PE=1 SV=2;>sp|Q13404-8|UB2V1_HUMAN Isoform 6 of Ubiquitin-conjugating enzyme E2 variant 1 OS=Homo sapiens GN=UBE2V1;>sp|Q13404-7|UB2V1_HUMAN Isoform 5 of Ubiquitin-c	9	12	12	6	5	10	5	10	4	4	76.9	76.9	38.1	16.495	147	147;105;170;170;221;370;103;52;89	8							9	17	1	4	8	23	4.7467e-73	0.82513	0.97871	10.489	28	0.74584	0.99757	-0.00351002	6.8509	7	0.85574	0.97008	0.0438244
Q12965;H0YLE5;O00160	Q12965	12;1;1	12;1;1	12;1;1	Unconventional myosin-Ie	MYO1E	>sp|Q12965|MYO1E_HUMAN Unconventional myosin-Ie OS=Homo sapiens GN=MYO1E PE=1 SV=2	3	12	12	12	8	6	8	6	8	6	11.9	11.9	11.9	127.06	1108	1108;187;1098	3.61			12	15	1						16	12	1.3853e-95	0.81782	0.97148	12.73	28	0.75363	0.94252	-0.0854049	13.436	16	0.84419	0.97168	0.0414468
O00299	O00299	12	12	12	Chloride intracellular channel protein 1	CLIC1	>sp|O00299|CLIC1_HUMAN Chloride intracellular channel protein 1 OS=Homo sapiens GN=CLIC1 PE=1 SV=4	1	12	12	12	5	12	5	12	5	12	57.7	57.7	57.7	26.922	241	241	6.38					5	21	21	1			13	35	1.0701e-160	0.9132	0.99064	12.373	47	0.69912	0.95803	-0.0618573	15.383	13	0.95377	0.99781	0.00316297
P07942;G3XAI2;E7EPA6	P07942;G3XAI2	12;12;4	12;12;4	12;12;4	Laminin subunit beta-1	LAMB1	>sp|P07942|LAMB1_HUMAN Laminin subunit beta-1 OS=Homo sapiens GN=LAMB1 PE=1 SV=2;>tr|G3XAI2|G3XAI2_HUMAN Laminin subunit beta-1 OS=Homo sapiens GN=LAMB1 PE=2 SV=1	3	12	12	12	0	12	0	12	0	12	9.6	9.6	9.6	198.04	1786	1786;1810;850	2.4	2	16	10	2								30	1.6886e-155	0.82559	1.0142	15.171	30	NaN	NaN	#VALUE!	NaN	0	0.82559	1.0142	-0.0203422
P51659;E7EWE5;P51659-3;P51659-2;E7ER27;G5E9S2;E7ET17;E7EPL9	P51659;E7EWE5;P51659-3;P51659-2;E7ER27;G5E9S2;E7ET17;E7EPL9	12;11;11;11;9;8;8;6	12;11;11;11;9;8;8;6	12;11;11;11;9;8;8;6	Peroxisomal multifunctional enzyme type 2;(3R)-hydroxyacyl-CoA dehydrogenase;Enoyl-CoA hydratase 2	HSD17B4	>sp|P51659|DHB4_HUMAN Peroxisomal multifunctional enzyme type 2 OS=Homo sapiens GN=HSD17B4 PE=1 SV=3;>tr|E7EWE5|E7EWE5_HUMAN Peroxisomal multifunctional enzyme type 2 OS=Homo sapiens GN=HSD17B4 PE=2 SV=1;>sp|P51659-3|DHB4_HUMAN Isoform 3 of Peroxisomal mul	8	12	12	12	2	11	2	11	2	11	23.4	23.4	23.4	79.685	736	736;712;718;761;500;596;599;474	5.03			1	10	11	7	3				5	27	1.4419e-78	0.88374	1.0284	36.777	32	0.73406	1.0379	0.0536674	30.396	5	0.89437	1.019	-0.0271541
P48047;H7C0C1;H7C086;H7C068	P48047;H7C0C1	12;6;3;3	12;6;3;3	12;6;3;3	ATP synthase subunit O, mitochondrial	ATP5O	>sp|P48047|ATPO_HUMAN ATP synthase subunit O, mitochondrial OS=Homo sapiens GN=ATP5O PE=1 SV=1;>tr|H7C0C1|H7C0C1_HUMAN Uncharacterized protein (Fragment) OS=Homo sapiens PE=4 SV=1	4	12	12	12	7	9	7	9	7	9	67.1	67.1	67.1	23.277	213	213;191;74;86	7						5	16	5			10	16	7.1569e-67	0.79113	0.99169	14.049	26	0.67614	0.9439	-0.0832941	7.0239	10	0.97171	1.0453	-0.0639171
Q13625-2;Q13625;Q13625-3;H0Y847;H7C5L8;B7Z2E9	Q13625-2;Q13625;Q13625-3	12;12;12;2;1;1	12;12;12;2;1;1	11;11;11;2;1;0	Apoptosis-stimulating of p53 protein 2	TP53BP2	>sp|Q13625-2|ASPP2_HUMAN Isoform 2 of Apoptosis-stimulating of p53 protein 2 OS=Homo sapiens GN=TP53BP2;>sp|Q13625|ASPP2_HUMAN Apoptosis-stimulating of p53 protein 2 OS=Homo sapiens GN=TP53BP2 PE=1 SV=2;>sp|Q13625-3|ASPP2_HUMAN Isoform 3 of Apoptosis-stimu	6	12	12	11	11	1	11	1	10	1	16.9	16.9	16.1	111.43	1005	1005;1128;1134;64;234;367	3.13			13	2							14	1	1.3735e-34	0.67469	0.83165	21.839	15	0.67257	0.82552	-0.276625	21.552	14	0.87679	1.0636	-0.0889557
P09104;B7Z2X9;F5H0C8;F5H1C3;F5H5U1;F5GWQ3;P13929-3;P13929-2;P13929	P09104;B7Z2X9;F5H0C8	12;11;9;4;4;4;3;3;3	10;9;7;3;3;3;1;1;1	10;9;7;3;3;3;1;1;1	Gamma-enolase;Enolase	ENO2	>sp|P09104|ENOG_HUMAN Gamma-enolase OS=Homo sapiens GN=ENO2 PE=1 SV=3;>tr|B7Z2X9|B7Z2X9_HUMAN Enolase OS=Homo sapiens GN=ENO2 PE=2 SV=1;>tr|F5H0C8|F5H0C8_HUMAN Enolase OS=Homo sapiens GN=ENO2 PE=2 SV=1	9	12	10	10	6	10	5	8	5	8	47.7	38.5	38.5	47.268	434	434;391;315;103;107;125;391;406;434	5.56				3	17	14	4	1			10	29	1.9919e-158	0.92949	1.0364	17.909	39	0.61558	0.85301	-0.229365	12.922	10	0.98176	1.0766	-0.106482
P05387;H0YDD8	P05387	12;4	12;4	12;4	60S acidic ribosomal protein P2	RPLP2	>sp|P05387|RLA2_HUMAN 60S acidic ribosomal protein P2 OS=Homo sapiens GN=RPLP2 PE=1 SV=1	2	12	12	12	9	8	9	8	9	8	82.6	82.6	82.6	11.665	115	115;92	7.95							14	23	2	5	17	27	1.488e-114	0.89527	1.0312	10.268	42	0.65886	0.93833	-0.0918327	5.414	17	0.9889	1.0808	-0.1121
Q92973-2;Q92973;Q92973-3;B4DSC0;E7EW37	Q92973-2;Q92973;Q92973-3	12;12;11;4;4	12;12;11;4;4	9;9;9;3;3	Transportin-1	TNPO1	>sp|Q92973-2|TNPO1_HUMAN Isoform 2 of Transportin-1 OS=Homo sapiens GN=TNPO1;>sp|Q92973|TNPO1_HUMAN Transportin-1 OS=Homo sapiens GN=TNPO1 PE=1 SV=2;>sp|Q92973-3|TNPO1_HUMAN Isoform 3 of Transportin-1 OS=Homo sapiens GN=TNPO1	5	12	12	9	4	10	4	10	2	7	20.1	20.1	16.5	101.31	890	890;898;848;128;136	4			4	16	4						7	17	5.2104e-62	0.84951	1.0326	23.211	24	0.75518	0.96771	-0.0473533	22.708	7	0.9639	1.0858	-0.118758
P51858;A8K8G0;P51858-2;P51858-3	P51858;A8K8G0;P51858-2;P51858-3	12;10;10;10	12;10;10;10	11;10;10;10	Hepatoma-derived growth factor	HDGF	>sp|P51858|HDGF_HUMAN Hepatoma-derived growth factor OS=Homo sapiens GN=HDGF PE=1 SV=1;>tr|A8K8G0|A8K8G0_HUMAN Hepatoma-derived growth factor OS=Homo sapiens GN=HDGF PE=2 SV=1;>sp|P51858-2|HDGF_HUMAN Isoform 2 of Hepatoma-derived growth factor OS=Homo sapi	4	12	12	11	9	6	9	6	8	6	57.1	57.1	52.9	26.788	240	240;208;233;256	5.68				1	15	16	5				25	12	2.1272e-46	0.65517	0.88069	19.825	36	0.58594	0.81334	-0.29807	12.269	24	1.011	1.0894	-0.123534
Q15366-6;Q15366-3;Q15366;Q15366-2;F8VZX2;Q15366-4;Q15366-5;B4DLC0;H3BRU6;G3V0E8;B4DXP5;F8W0G4;F8W1G6;F8VXH9;J3QT27;P57721-2;P57721-3;P57721-5;E9PFP8;P57721-4;P57721;H3BSS4;F8VTZ0;H3BSP4;H3BND9;F8VRH0;C9K0A2;F8WC71;C9IZV9;C9J7A9;C9JSA6;C9J5V4;C9JTY5;C9JZY3;C9J0A4;P57723-2;P57723	Q15366-6;Q15366-3;Q15366;Q15366-2;F8VZX2;Q15366-4;Q15366-5;B4DLC0;H3BRU6;G3V0E8;B4DXP5;F8W0G4;F8W1G6	12;12;12;12;10;10;10;9;9;9;9;7;6;5;5;5;5;5;5;5;5;4;3;2;2;2;1;1;1;1;1;1;1;1;1;1;1	12;12;12;12;10;10;10;9;9;9;9;7;6;5;5;5;5;5;5;5;5;4;3;2;2;2;1;1;1;1;1;1;1;1;1;1;1	8;8;8;8;6;6;6;5;6;5;5;3;3;3;1;1;1;1;1;1;1;4;0;0;2;2;0;0;0;0;0;0;0;0;0;0;0	Poly(rC)-binding protein 2	PCBP2	>sp|Q15366-6|PCBP2_HUMAN Isoform 6 of Poly(rC)-binding protein 2 OS=Homo sapiens GN=PCBP2;>sp|Q15366-3|PCBP2_HUMAN Isoform 3 of Poly(rC)-binding protein 2 OS=Homo sapiens GN=PCBP2;>sp|Q15366|PCBP2_HUMAN Poly(rC)-binding protein 2 OS=Homo sapiens GN=PCBP2 P	37	12	12	8	5	11	5	11	2	8	52.4	52.4	39.9	38.15	361	361;362;365;366;321;331;335;301;301;318;322;158;202;160;322;345;346;351;361;370;371;184;64;36;112;310;46;57;75;86;92;107;124;168;323;360;403	5.88				1	14	20	7			1	13	30	2.5287e-79	0.88428	1.0374	17.232	43	0.69531	0.9721	-0.0408234	7.9748	13	0.98033	1.1027	-0.14104
P12081-4;P12081;P12081-3;P12081-2;B4DDD8;E7ETE2;B4E1C5;B3KWE1;C9JWK3;D6RF05;D6RJE6	P12081-4;P12081;P12081-3;P12081-2;B4DDD8;E7ETE2;B4E1C5;B3KWE1;C9JWK3	12;12;11;11;10;9;9;9;6;3;2	12;12;11;11;10;9;9;9;6;3;2	8;8;7;7;8;7;7;5;4;3;0	Histidine--tRNA ligase, cytoplasmic	HARS	>sp|P12081-4|SYHC_HUMAN Isoform 4 of Histidine--tRNA ligase, cytoplasmic OS=Homo sapiens GN=HARS;>sp|P12081|SYHC_HUMAN Histidine--tRNA ligase, cytoplasmic OS=Homo sapiens GN=HARS PE=1 SV=2;>sp|P12081-3|SYHC_HUMAN Isoform 3 of Histidine--tRNA ligase, cytopl	11	12	12	8	3	10	3	10	3	6	27.2	27.2	19.2	54.846	489	489;509;449;469;435;288;395;440;314;60;181	5.1				2	14	4					6	14	6.5763e-61	0.91404	1.0439	12.656	19	0.68806	0.94556	-0.0807591	7.0936	6	0.97241	1.1058	-0.14509
P62910;F8W727;D3YTB1;D3YTI8	P62910;F8W727;D3YTB1	12;12;11;1	12;12;11;1	12;12;11;1	60S ribosomal protein L32	RPL32	>sp|P62910|RL32_HUMAN 60S ribosomal protein L32 OS=Homo sapiens GN=RPL32 PE=1 SV=2;>tr|F8W727|F8W727_HUMAN 60S ribosomal protein L32 OS=Homo sapiens GN=RPL32 PE=2 SV=1;>tr|D3YTB1|D3YTB1_HUMAN 60S ribosomal protein L32 (Fragment) OS=Homo sapiens GN=RPL32 PE	4	12	12	12	5	11	5	11	5	11	47.4	47.4	47.4	15.86	135	135;153;133;62	7.42						2	13	9	2		7	19	9.1676e-41	0.96875	1.1113	26.045	26	0.64289	0.91331	-0.130823	50.926	7	0.99622	1.1132	-0.154713
O43175;Q5SZU1	O43175;Q5SZU1	12;11	12;11	12;11	D-3-phosphoglycerate dehydrogenase	PHGDH	>sp|O43175|SERA_HUMAN D-3-phosphoglycerate dehydrogenase OS=Homo sapiens GN=PHGDH PE=1 SV=4;>tr|Q5SZU1|Q5SZU1_HUMAN D-3-phosphoglycerate dehydrogenase OS=Homo sapiens GN=PHGDH PE=2 SV=1	2	12	12	12	4	12	4	12	4	12	32.8	32.8	32.8	56.65	533	533;499	5.06				9	19	5	3				7	29	7.805e-99	0.94783	1.0879	31.771	32	0.55477	0.76305	-0.39015	24.56	7	0.98271	1.1177	-0.160533
P62913-2	P62913-2	12	1	1			>sp|P62913-2|RL11_HUMAN Isoform 2 of 60S ribosomal protein L11 OS=Homo sapiens GN=RPL11	1	12	1	1	4	11	0	1	0	1	66.7	6.2	6.2	20.124	177	177	8								1				1	7.0294e-58	0.95258	1.1226	NaN	1	NaN	NaN	#VALUE!	NaN	0	0.95258	1.1226	-0.166844
Q02218;E9PCR7;F5H801;Q02218-2;E9PDF2;E9PFG7;C9J4G7;Q02218-3;Q9ULD0-3;Q9ULD0-2;Q9ULD0	Q02218;E9PCR7;F5H801;Q02218-2;E9PDF2;E9PFG7	12;11;10;10;10;9;3;3;1;1;1	12;11;10;10;10;9;3;3;1;1;1	12;11;10;10;10;9;3;3;1;1;1	2-oxoglutarate dehydrogenase, mitochondrial	OGDH	>sp|Q02218|ODO1_HUMAN 2-oxoglutarate dehydrogenase, mitochondrial OS=Homo sapiens GN=OGDH PE=1 SV=3;>tr|E9PCR7|E9PCR7_HUMAN 2-oxoglutarate dehydrogenase, mitochondrial OS=Homo sapiens GN=OGDH PE=2 SV=1;>tr|F5H801|F5H801_HUMAN 2-oxoglutarate dehydrogenase,	11	12	12	12	7	7	7	7	7	7	17.8	17.8	17.8	115.93	1023	1023;1038;974;1019;1034;873;211;427;801;953;1010	3.77			10	17	3						16	14	1.237e-40	0.72849	0.90752	23.417	29	0.66913	0.83278	-0.263993	6.0074	15	0.9799	1.1457	-0.196229
P62913;Q5VVC8;Q5VVC9	P62913;Q5VVC8	12;9;5	12;9;5	1;0;0	60S ribosomal protein L11	RPL11	>sp|P62913|RL11_HUMAN 60S ribosomal protein L11 OS=Homo sapiens GN=RPL11 PE=1 SV=2;>tr|Q5VVC8|Q5VVC8_HUMAN 60S ribosomal protein L11 (Fragment) OS=Homo sapiens GN=RPL11 PE=2 SV=1	3	12	12	1	5	11	5	11	1	1	66.9	66.9	6.7	20.252	178	178;174;131	7.92						4	12	14	1	8	11	28	7.739e-59	0.98562	1.0591	15.673	37	0.65017	0.89446	-0.160911	4.7916	11	1.0366	1.1549	-0.207768
Q8NFC6;H0Y9Y2	Q8NFC6	12;2	12;2	12;2	Biorientation of chromosomes in cell division protein 1-like 1	BOD1L1	>sp|Q8NFC6|BD1L1_HUMAN Biorientation of chromosomes in cell division protein 1-like 1 OS=Homo sapiens GN=BOD1L1 PE=1 SV=2	2	12	12	12	4	12	4	12	4	12	5.9	5.9	5.9	330.46	3051	3051;207	1.45	15	4	3								10	12	1.3832e-51	0.82546	0.98283	32.747	22	0.62686	0.7974	-0.326624	28.549	10	0.92494	1.2001	-0.263155
P0CW22;P08708;H0YN88;H0YK46;H0YN73;H3BNC9	P0CW22;P08708;H0YN88;H0YK46	12;12;10;10;4;2	12;12;10;10;4;2	12;12;10;10;4;2	40S ribosomal protein S17-like;40S ribosomal protein S17	RPS17L;RPS17	>sp|P0CW22|RS17L_HUMAN 40S ribosomal protein S17-like OS=Homo sapiens GN=RPS17L PE=1 SV=1;>sp|P08708|RS17_HUMAN 40S ribosomal protein S17 OS=Homo sapiens GN=RPS17 PE=1 SV=2;>tr|H0YN88|H0YN88_HUMAN 40S ribosomal protein S17 OS=Homo sapiens GN=RPS17L PE=2 SV	6	12	12	12	5	11	5	11	5	11	68.1	68.1	68.1	15.55	135	135;135;136;191;59;293	7.56							24	19		2	12	33	3.6762e-117	1.0816	1.1742	20.82	43	0.61432	0.84771	-0.238357	8.2392	11	1.1217	1.2147	-0.2806
P31350;P31350-2;C9JXC1	P31350;P31350-2	12;10;4	12;10;4	11;9;3	Ribonucleoside-diphosphate reductase subunit M2	RRM2	>sp|P31350|RIR2_HUMAN Ribonucleoside-diphosphate reductase subunit M2 OS=Homo sapiens GN=RRM2 PE=1 SV=1;>sp|P31350-2|RIR2_HUMAN Isoform 2 of Ribonucleoside-diphosphate reductase subunit M2 OS=Homo sapiens GN=RRM2	3	12	12	11	8	7	8	7	8	6	30.3	30.3	26.5	44.877	389	389;449;289	5.76					13	21	4				21	17	3.2857e-78	0.74922	0.87793	36.945	34	0.499	0.70815	-0.497873	34.298	18	1.1658	1.2879	-0.365021
P30085;Q5T0D2;P30085-2	P30085;Q5T0D2;P30085-2	12;8;7	12;8;7	12;8;7	UMP-CMP kinase	CMPK1	>sp|P30085|KCY_HUMAN UMP-CMP kinase OS=Homo sapiens GN=CMPK1 PE=1 SV=3;>tr|Q5T0D2|Q5T0D2_HUMAN UMP-CMP kinase OS=Homo sapiens GN=CMPK1 PE=2 SV=1;>sp|P30085-2|KCY_HUMAN Isoform 2 of UMP-CMP kinase OS=Homo sapiens GN=CMPK1	3	12	12	12	7	9	7	9	7	9	63.3	63.3	63.3	22.222	196	196;169;147	6.86						10	20	5			9	26	6.1341e-86	1.1675	1.2756	24.93	35	0.57459	0.75833	-0.399102	6.7933	9	1.1959	1.306	-0.385155
P20042	P20042	12	12	12	Eukaryotic translation initiation factor 2 subunit 2	EIF2S2	>sp|P20042|IF2B_HUMAN Eukaryotic translation initiation factor 2 subunit 2 OS=Homo sapiens GN=EIF2S2 PE=1 SV=2	1	12	12	12	5	9	5	9	5	9	41.1	41.1	41.1	38.388	333	333	5.21				3	17	7	1				15	13	1.0048e-41	0.62143	0.81623	44.637	27	0.49842	0.66738	-0.58342	16.478	14	1.1866	1.3434	-0.425889
Q32MZ4-3;Q32MZ4-2;Q32MZ4;C9JTC6	Q32MZ4-3;Q32MZ4-2;Q32MZ4	12;12;12;1	12;12;12;1	10;10;10;0	Leucine-rich repeat flightless-interacting protein 1	LRRFIP1	>sp|Q32MZ4-3|LRRF1_HUMAN Isoform 3 of Leucine-rich repeat flightless-interacting protein 1 OS=Homo sapiens GN=LRRFIP1;>sp|Q32MZ4-2|LRRF1_HUMAN Isoform 2 of Leucine-rich repeat flightless-interacting protein 1 OS=Homo sapiens GN=LRRFIP1;>sp|Q32MZ4|LRRF1_HUM	4	12	12	10	10	7	10	7	9	5	23.3	23.3	19.1	82.688	752	752;784;808;149	3.08		4	17	2	2						17	8	1.117e-85	0.52034	0.67028	52.51	24	0.48397	0.61132	-0.71	34.679	17	1.408	1.6221	-0.697863
E7ETU9;O00469;O00469-2;B3KWS3;C9JXZ0	E7ETU9;O00469;O00469-2;B3KWS3	12;12;12;7;3	12;12;12;7;3	12;12;12;7;3	Procollagen-lysine,2-oxoglutarate 5-dioxygenase 2	PLOD2	>tr|E7ETU9|E7ETU9_HUMAN Procollagen-lysine,2-oxoglutarate 5-dioxygenase 2 OS=Homo sapiens GN=PLOD2 PE=2 SV=1;>sp|O00469|PLOD2_HUMAN Procollagen-lysine,2-oxoglutarate 5-dioxygenase 2 OS=Homo sapiens GN=PLOD2 PE=1 SV=2;>sp|O00469-2|PLOD2_HUMAN Isoform 2 of P	5	12	12	12	4	11	4	11	4	11	21.3	21.3	21.3	81.169	703	703;737;758;418;229	3.65			8	15							4	19	1.5533e-59	1.4996	1.7692	47.094	22	0.39398	0.49597	-1.01168	10.982	3	1.5157	1.7798	-0.831715
P22102;P22102-2;B4DJ93;C9JBJ1;C9JTV6;F8WD69;C9JZG2;C9JKQ7;H7C366;H7C489	P22102;P22102-2;B4DJ93	12;6;6;3;3;3;2;2;1;1	12;6;6;3;3;3;2;2;1;1	12;6;6;3;3;3;2;2;1;1	Trifunctional purine biosynthetic protein adenosine-3;Phosphoribosylamine--glycine ligase;Phosphoribosylformylglycinamidine cyclo-ligase;Phosphoribosylglycinamide formyltransferase	GART	>sp|P22102|PUR2_HUMAN Trifunctional purine biosynthetic protein adenosine-3 OS=Homo sapiens GN=GART PE=1 SV=1;>sp|P22102-2|PUR2_HUMAN Isoform Short of Trifunctional purine biosynthetic protein adenosine-3 OS=Homo sapiens GN=GART;>tr|B4DJ93|B4DJ93_HUMAN Pho	10	12	12	12	3	12	3	12	3	12	17.2	17.2	17.2	107.77	1010	1010;433;562;232;241;306;136;138;145;223	3.63		1	13	12	4						4	26	1.6305e-42	1.4963	1.7401	46.925	30	0.40142	0.48946	-1.03074	47.35	4	1.5415	1.8115	-0.857185
P05121;P05121-2	P05121;P05121-2	11;10	11;10	11;10	Plasminogen activator inhibitor 1	SERPINE1	>sp|P05121|PAI1_HUMAN Plasminogen activator inhibitor 1 OS=Homo sapiens GN=SERPINE1 PE=1 SV=1;>sp|P05121-2|PAI1_HUMAN Isoform 2 of Plasminogen activator inhibitor 1 OS=Homo sapiens GN=SERPINE1	2	11	11	11	0	11	0	11	0	11	42.5	42.5	42.5	45.059	402	402;387	5.67			1	2	8	9	2	1	1			24	3.706e-40	0.16352	0.18294	69.545	24	NaN	NaN	#VALUE!	NaN	0	0.16352	0.18294	2.45056
P24844;P24844-2	P24844;P24844-2	11;8	4;3	4;3	Myosin regulatory light polypeptide 9	MYL9	>sp|P24844|MYL9_HUMAN Myosin regulatory light polypeptide 9 OS=Homo sapiens GN=MYL9 PE=1 SV=4;>sp|P24844-2|MYL9_HUMAN Isoform 2 of Myosin regulatory light polypeptide 9 OS=Homo sapiens GN=MYL9	2	11	4	4	6	11	1	4	1	4	72.1	34.9	34.9	19.827	172	172;118	8.21							7	2		5	1	13	2.3645e-218	0.35586	0.43013	48.561	13	1.7165	2.3312	1.22107	NaN	1	0.35559	0.42532	1.23338
P98082-2;P98082-3;P98082;D6REB1;D6RIA5;D6RFF7;D6RGZ1	P98082-2;P98082-3;P98082	11;11;11;2;2;2;1	11;11;11;2;2;2;1	11;11;11;2;2;2;1	Disabled homolog 2	DAB2	>sp|P98082-2|DAB2_HUMAN Isoform 2 of Disabled homolog 2 OS=Homo sapiens GN=DAB2;>sp|P98082-3|DAB2_HUMAN Isoform 3 of Disabled homolog 2 OS=Homo sapiens GN=DAB2;>sp|P98082|DAB2_HUMAN Disabled homolog 2 OS=Homo sapiens GN=DAB2 PE=1 SV=3	7	11	11	11	10	5	10	5	10	5	30.1	30.1	30.1	58.86	552	552;749;770;67;76;116;39	4.13			6	19	3	2	1				22	9	8.8749e-72	1.4708	1.7225	61.951	31	1.5152	1.9084	0.932364	14.996	22	0.38707	0.44843	1.15705
E9PES6;E7ES08;E7EQU1;O15347	E9PES6;E7ES08;E7EQU1;O15347	11;11;11;11	11;11;11;11	11;11;11;11	High mobility group protein B3	HMGB3	>tr|E9PES6|E9PES6_HUMAN High mobility group protein B3 (Fragment) OS=Homo sapiens GN=HMGB3 PE=2 SV=1;>tr|E7ES08|E7ES08_HUMAN High mobility group protein B3 (Fragment) OS=Homo sapiens GN=HMGB3 PE=2 SV=1;>tr|E7EQU1|E7EQU1_HUMAN High mobility group protein B3	4	11	11	11	10	6	10	6	10	6	37.9	37.9	37.9	17.522	153	153;188;193;200	7.08						2	20	4			16	10	2.1998e-56	1.2931	1.781	73.494	26	1.3445	1.9228	0.943209	41.217	16	0.40212	0.4514	1.14752
Q16527;F8VQR7;F8VW96	Q16527;F8VQR7;F8VW96	11;10;10	11;10;10	11;10;10	Cysteine and glycine-rich protein 2	CSRP2	>sp|Q16527|CSRP2_HUMAN Cysteine and glycine-rich protein 2 OS=Homo sapiens GN=CSRP2 PE=1 SV=3;>tr|F8VQR7|F8VQR7_HUMAN Cysteine and glycine-rich protein 2 OS=Homo sapiens GN=CSRP2 PE=2 SV=1;>tr|F8VW96|F8VW96_HUMAN Cysteine and glycine-rich protein 2 OS=Homo	3	11	11	11	8	10	8	10	8	10	65.8	65.8	65.8	20.954	193	193;187;243	6.82					1	11	22	6			18	22	1.3098e-65	0.46371	0.49749	75.18	33	1.5249	2.131	1.09153	6.6682	13	0.43202	0.46982	1.08982
O95817;C9JFK9	O95817;C9JFK9	11;6	11;6	11;6	BAG family molecular chaperone regulator 3	BAG3	>sp|O95817|BAG3_HUMAN BAG family molecular chaperone regulator 3 OS=Homo sapiens GN=BAG3 PE=1 SV=3;>tr|C9JFK9|C9JFK9_HUMAN BAG family molecular chaperone regulator 3 (Fragment) OS=Homo sapiens GN=BAG3 PE=2 SV=1	2	11	11	11	9	3	9	3	9	3	35.7	35.7	35.7	61.594	575	575;325	4.5				14	6	1	1				19	3	1.1228e-31	1.097	1.4076	35.409	22	1.1039	1.4547	0.540722	12.232	19	0.52105	0.58262	0.779373
O00764;F2Z2Y4;O00764-2;O00764-3;A8MV33	O00764;F2Z2Y4;O00764-2;O00764-3	11;9;9;7;1	11;9;9;7;1	11;9;9;7;1	Pyridoxal kinase	PDXK	>sp|O00764|PDXK_HUMAN Pyridoxal kinase OS=Homo sapiens GN=PDXK PE=1 SV=1;>tr|F2Z2Y4|F2Z2Y4_HUMAN Pyridoxal kinase OS=Homo sapiens GN=PDXK PE=2 SV=1;>sp|O00764-2|PDXK_HUMAN Isoform 2 of Pyridoxal kinase OS=Homo sapiens GN=PDXK;>sp|O00764-3|PDXK_HUMAN Isofor	5	11	11	11	2	10	2	10	2	10	55.4	55.4	55.4	35.102	312	312;272;284;239;87	5.97					7	16	6				3	26	5.4066e-80	0.53315	0.60367	29.69	28	1.0904	1.6265	0.701771	16.455	2	0.52126	0.59773	0.742434
F8W1R7;P60660-2;P60660;G3V1V0;J3KND3;G8JLA2;B7Z6Z4;F8VPF3;G3V1Y7;F8VZU9;F8W180;F8W1I5;P14649;H0YI43;F8VXL3	F8W1R7;P60660-2;P60660;G3V1V0;J3KND3;G8JLA2;B7Z6Z4;F8VPF3;G3V1Y7	11;11;11;11;9;9;9;8;7;4;4;3;3;2;1	11;11;11;11;9;9;9;8;7;4;4;3;3;2;1	11;11;11;11;9;9;9;8;7;4;4;3;3;2;1	Myosin light polypeptide 6	MYL6	>tr|F8W1R7|F8W1R7_HUMAN Myosin light polypeptide 6 OS=Homo sapiens GN=MYL6 PE=2 SV=1;>sp|P60660-2|MYL6_HUMAN Isoform Smooth muscle of Myosin light polypeptide 6 OS=Homo sapiens GN=MYL6;>sp|P60660|MYL6_HUMAN Myosin light polypeptide 6 OS=Homo sapiens GN=MYL	15	11	11	11	8	10	8	10	8	10	66.9	66.9	66.9	16.29	145	145;151;151;161;152;152;238;130;115;103;196;175;208;83;47	8.15						3	16	41	10	12	16	66	1.7497e-138	0.58884	0.65929	40.875	76	1.1589	1.5593	0.640899	11.999	16	0.56349	0.62975	0.667149
P23921;E9PD78;F5H861;E9PL69	P23921;E9PD78;F5H861;E9PL69	11;9;7;7	11;9;7;7	11;9;7;7	Ribonucleoside-diphosphate reductase large subunit;Ribonucleoside-diphosphate reductase	RRM1	>sp|P23921|RIR1_HUMAN Ribonucleoside-diphosphate reductase large subunit OS=Homo sapiens GN=RRM1 PE=1 SV=1;>tr|E9PD78|E9PD78_HUMAN Ribonucleoside-diphosphate reductase OS=Homo sapiens GN=RRM1 PE=2 SV=2;>tr|F5H861|F5H861_HUMAN Ribonucleoside-diphosphate red	4	11	11	11	1	11	1	11	1	11	21.8	21.8	21.8	90.069	792	792;695;454;570	3.84			3	16							1	18	2.1936e-42	0.54759	0.64645	24.003	19	0.97913	1.3583	0.441802	NaN	1	0.54511	0.64625	0.629836
E9PRV2;P46937-3;P46937-2;F5H202;P46937;P46937-4;H0YCI3	E9PRV2;P46937-3;P46937-2;F5H202;P46937	11;11;11;11;11;5;4	11;11;11;11;11;5;4	11;11;11;11;11;5;4	Yorkie homolog	YAP1	>tr|E9PRV2|E9PRV2_HUMAN Yorkie homolog OS=Homo sapiens GN=YAP1 PE=2 SV=1;>sp|P46937-3|YAP1_HUMAN Isoform 3 of Yorkie homolog OS=Homo sapiens GN=YAP1;>sp|P46937-2|YAP1_HUMAN Isoform 2 of Yorkie homolog OS=Homo sapiens GN=YAP1;>tr|F5H202|F5H202_HUMAN Yorkie	7	11	11	11	10	4	10	4	10	4	47.3	47.3	47.3	48.274	450	450;454;488;492;504;326;258	4.81				16	14	5	2				33	4	2.4143e-72	0.86777	1.1583	52.987	37	0.87162	1.1672	0.223052	54.25	33	0.60003	0.67244	0.572523
P30086	P30086	11	11	11	Phosphatidylethanolamine-binding protein 1;Hippocampal cholinergic neurostimulating peptide	PEBP1	>sp|P30086|PEBP1_HUMAN Phosphatidylethanolamine-binding protein 1 OS=Homo sapiens GN=PEBP1 PE=1 SV=3	1	11	11	11	8	10	8	10	8	10	77	77	77	21.057	187	187	7.17					1	9	21	7	1	3	14	28	3.9065e-98	0.67783	0.7448	33.153	42	0.97478	1.3878	0.4728	10.197	14	0.65893	0.68302	0.55
Q99798;A2A274	Q99798;A2A274	11;11	11;11	11;11	Aconitate hydratase, mitochondrial	ACO2	>sp|Q99798|ACON_HUMAN Aconitate hydratase, mitochondrial OS=Homo sapiens GN=ACO2 PE=1 SV=2;>tr|A2A274|A2A274_HUMAN Aconitate hydratase, mitochondrial OS=Homo sapiens GN=ACO2 PE=2 SV=1	2	11	11	11	4	11	4	11	4	11	20	20	20	85.424	780	780;805	4.08			2	18	4						6	18	4.6723e-95	0.63697	0.73698	37.901	24	1.0955	1.335	0.41684	10.735	6	0.6133	0.6913	0.532616
P61163;F5H3I4;B4DXP9;R4GMT0	P61163;F5H3I4;B4DXP9;R4GMT0	11;9;9;9	11;9;9;9	6;5;5;6	Alpha-centractin	ACTR1A	>sp|P61163|ACTZ_HUMAN Alpha-centractin OS=Homo sapiens GN=ACTR1A PE=1 SV=1;>tr|F5H3I4|F5H3I4_HUMAN Alpha-centractin OS=Homo sapiens GN=ACTR1A PE=2 SV=1;>tr|B4DXP9|B4DXP9_HUMAN Alpha-centractin OS=Homo sapiens GN=ACTR1A PE=2 SV=1;>tr|R4GMT0|R4GMT0_HUMAN Alp	4	11	11	6	2	11	2	11	1	6	47.6	47.6	30.1	42.613	376	376;302;329;332	5.71					14	16	4				10	24	2.0382e-78	0.67132	0.73171	34.236	34	1.0363	1.4149	0.5007	8.0083	10	0.63873	0.69865	0.517358
Q9H910;B4DLH4;A6NGP5;Q9H910-2;H3BU16;H3BMV3;H3BMT0;H3BTV5;H3BMM8;B4E1P3;H3BS08	Q9H910;B4DLH4;A6NGP5;Q9H910-2;H3BU16;H3BMV3;H3BMT0;H3BTV5	11;11;10;9;8;8;6;6;4;4;1	11;11;10;9;8;8;6;6;4;4;1	11;11;10;9;8;8;6;6;4;4;1	Hematological and neurological expressed 1-like protein	HN1L	>sp|Q9H910|HN1L_HUMAN Hematological and neurological expressed 1-like protein OS=Homo sapiens GN=HN1L PE=1 SV=1;>tr|B4DLH4|B4DLH4_HUMAN Hematological and neurological-expressed 1-like protein OS=Homo sapiens GN=HN1L PE=2 SV=1;>tr|A6NGP5|A6NGP5_HUMAN Hemato	11	11	11	11	11	6	11	6	11	6	73.7	73.7	73.7	20.063	190	190;218;178;174;167;190;115;116;70;98;77	7.19						5	24	13			32	10	1.8237e-66	0.87935	1.2508	25.798	40	0.91236	1.2617	0.335369	9.0577	31	0.64399	0.70677	0.500687
Q96CV9-2;Q96CV9;Q96CV9-3	Q96CV9-2;Q96CV9;Q96CV9-3	11;11;9	11;11;9	11;11;9	Optineurin	OPTN	>sp|Q96CV9-2|OPTN_HUMAN Isoform 2 of Optineurin OS=Homo sapiens GN=OPTN;>sp|Q96CV9|OPTN_HUMAN Optineurin OS=Homo sapiens GN=OPTN PE=1 SV=2;>sp|Q96CV9-3|OPTN_HUMAN Isoform 3 of Optineurin OS=Homo sapiens GN=OPTN	3	11	11	11	8	4	8	4	8	4	19.4	19.4	19.4	65.202	571	571;577;520	4.58				9	9	1					14	5	1.5735e-30	0.88839	1.2652	36.624	19	1.0803	1.4271	0.513086	20.693	14	0.63591	0.70821	0.497751
Q9UNX3;E5RIT6;E5RHH1	Q9UNX3;E5RIT6	11;10;5	2;1;1	2;1;1	60S ribosomal protein L26-like 1	RPL26L1	>sp|Q9UNX3|RL26L_HUMAN 60S ribosomal protein L26-like 1 OS=Homo sapiens GN=RPL26L1 PE=1 SV=1;>tr|E5RIT6|E5RIT6_HUMAN 60S ribosomal protein L26-like 1 (Fragment) OS=Homo sapiens GN=RPL26L1 PE=2 SV=1	3	11	2	2	8	8	1	1	1	1	53.1	11.7	11.7	17.256	145	145;128;39	7.5							1	1			1	1	6.202e-29	0.82135	1.0061	48.756	2	0.99762	1.4203	0.506196	NaN	1	0.67622	0.71274	0.488552
Q96CT7;M0R2F5	Q96CT7	11;5	11;5	11;5	Coiled-coil domain-containing protein 124	CCDC124	>sp|Q96CT7|CC124_HUMAN Coiled-coil domain-containing protein 124 OS=Homo sapiens GN=CCDC124 PE=1 SV=1	2	11	11	11	11	3	11	3	11	3	44.8	44.8	44.8	25.835	223	223;137	6.52						14	15				25	4	1.8487e-35	0.78687	1.1235	17.484	29	0.78819	1.1569	0.210264	10.296	25	0.59583	0.74158	0.431326
P15531;P15531-2;E5RHP0;C9K028	P15531;P15531-2;E5RHP0	11;11;6;3	1;1;0;0	1;1;0;0	Nucleoside diphosphate kinase A	NME1	>sp|P15531|NDKA_HUMAN Nucleoside diphosphate kinase A OS=Homo sapiens GN=NME1 PE=1 SV=1;>sp|P15531-2|NDKA_HUMAN Isoform 2 of Nucleoside diphosphate kinase A OS=Homo sapiens GN=NME1;>tr|E5RHP0|E5RHP0_HUMAN Nucleoside diphosphate kinase A OS=Homo sapiens GN=	4	11	1	1	7	11	1	1	1	1	70.4	9.2	9.2	17.149	152	152;177;82;60	7.7							3	7			4	6	1.1476e-66	0.72934	0.83135	28.513	10	0.97966	1.3359	0.417812	6.4109	4	0.69557	0.74852	0.417887
Q99714;Q99714-2;Q5H928	Q99714;Q99714-2;Q5H928	11;9;7	11;9;7	11;9;7	3-hydroxyacyl-CoA dehydrogenase type-2	HSD17B10	>sp|Q99714|HCD2_HUMAN 3-hydroxyacyl-CoA dehydrogenase type-2 OS=Homo sapiens GN=HSD17B10 PE=1 SV=3;>sp|Q99714-2|HCD2_HUMAN Isoform 2 of 3-hydroxyacyl-CoA dehydrogenase type-2 OS=Homo sapiens GN=HSD17B10;>tr|Q5H928|Q5H928_HUMAN 3-hydroxyacyl-CoA dehydrogena	3	11	11	11	4	10	4	10	4	10	67.8	67.8	67.8	26.923	261	261;252;169	6.74						9	21	1			6	25	6.2173e-189	0.68613	0.76527	24.44	29	0.98907	1.3952	0.480472	29.789	6	0.68135	0.75301	0.409259
P38117;P38117-2;M0QY67	P38117;P38117-2	11;11;4	11;11;4	11;11;4	Electron transfer flavoprotein subunit beta	ETFB	>sp|P38117|ETFB_HUMAN Electron transfer flavoprotein subunit beta OS=Homo sapiens GN=ETFB PE=1 SV=3;>sp|P38117-2|ETFB_HUMAN Isoform 2 of Electron transfer flavoprotein subunit beta OS=Homo sapiens GN=ETFB	3	11	11	11	5	10	5	10	5	10	42.7	42.7	42.7	27.843	255	255;346;178	6.71						8	15	1			7	17	2.4013e-32	0.70875	0.80752	24.988	24	0.81761	1.1607	0.214995	40.985	7	0.70716	0.76528	0.38594
Q8IX12-2;Q8IX12;F5H2E6;F5H1H2;F5H3E1;H0YFJ7;F5H7M9	Q8IX12-2;Q8IX12;F5H2E6;F5H1H2	11;11;9;7;5;3;1	11;11;9;7;5;3;1	11;11;9;7;5;3;1	Cell division cycle and apoptosis regulator protein 1	CCAR1	>sp|Q8IX12-2|CCAR1_HUMAN Isoform 2 of Cell division cycle and apoptosis regulator protein 1 OS=Homo sapiens GN=CCAR1;>sp|Q8IX12|CCAR1_HUMAN Cell division cycle and apoptosis regulator protein 1 OS=Homo sapiens GN=CCAR1 PE=1 SV=2;>tr|F5H2E6|F5H2E6_HUMAN Cel	7	11	11	11	4	9	4	9	4	9	12.1	12.1	12.1	131.04	1135	1135;1150;772;646;568;290;171	3.18			14	3							7	10	6.2684e-46	0.70486	0.84718	27.71	17	0.87554	1.0843	0.116764	10.436	7	0.65903	0.77731	0.363438
P37108;H0YLA2;H0YLW0	P37108;H0YLA2	11;7;2	11;7;2	11;7;2	Signal recognition particle 14 kDa protein	SRP14	>sp|P37108|SRP14_HUMAN Signal recognition particle 14 kDa protein OS=Homo sapiens GN=SRP14 PE=1 SV=2;>tr|H0YLA2|H0YLA2_HUMAN Signal recognition particle 14 kDa protein OS=Homo sapiens GN=SRP14 PE=2 SV=1	3	11	11	11	7	10	7	10	7	10	71.3	71.3	71.3	14.57	136	136;115;56	7.47						2	14	13		1	11	19	1.0699e-63	0.80498	0.96958	32.047	26	0.95243	1.3676	0.451646	14.302	10	0.71834	0.77747	0.363141
Q96T76-5;Q96T76;Q96T76-9;Q96T76-8;Q5T454;Q96T76-7;H0Y746;B0QZ77;H0Y7V3;F8WCH8;H7C0A9;H7C1W5	Q96T76-5;Q96T76;Q96T76-9;Q96T76-8	11;11;10;10;5;5;5;3;2;2;1;1	11;11;10;10;5;5;5;3;2;2;1;1	11;11;10;10;5;5;5;3;2;2;1;1	MMS19 nucleotide excision repair protein homolog	MMS19	>sp|Q96T76-5|MMS19_HUMAN Isoform 4 of MMS19 nucleotide excision repair protein homolog OS=Homo sapiens GN=MMS19;>sp|Q96T76|MMS19_HUMAN MMS19 nucleotide excision repair protein homolog OS=Homo sapiens GN=MMS19 PE=1 SV=2;>sp|Q96T76-9|MMS19_HUMAN Isoform 6 of	12	11	11	11	2	10	2	10	2	10	21.2	21.2	21.2	102.64	932	932;1030;987;1051;302;318;598;277;90;173;98;149	3.76			4	13							2	15	2.8544e-55	0.67816	0.77971	18.719	16	0.92939	1.199	0.261832	NaN	1	0.66859	0.77796	0.362232
C9J7T7;C9JE98;C9J239;Q9Y618-5;C9J0Q5;Q9Y618-4;C9JFD3;Q9Y618-3;Q9Y618;Q9Y618-2;H7C1J7;C9JQE8;H7C0P3	C9J7T7;C9JE98;C9J239;Q9Y618-5;C9J0Q5;Q9Y618-4;C9JFD3;Q9Y618-3;Q9Y618	11;11;11;11;11;11;11;11;11;5;2;2;1	11;11;11;11;11;11;11;11;11;5;2;2;1	11;11;11;11;11;11;11;11;11;5;2;2;1	Nuclear receptor corepressor 2	NCOR2	>tr|C9J7T7|C9J7T7_HUMAN Nuclear receptor corepressor 2 OS=Homo sapiens GN=NCOR2 PE=2 SV=2;>tr|C9JE98|C9JE98_HUMAN Nuclear receptor corepressor 2 OS=Homo sapiens GN=NCOR2 PE=2 SV=1;>tr|C9J239|C9J239_HUMAN Nuclear receptor corepressor 2 OS=Homo sapiens GN=NC	13	11	11	11	10	4	10	4	10	4	8.1	8.1	8.1	222.71	2075	2075;2458;2459;2462;2504;2508;2514;2517;2525;769;225;1451;156	2.38	2	13	7	2							18	6	1.3122e-29	0.78187	0.99507	29.252	24	0.80877	1.0752	0.104605	27.954	18	0.6194	0.79138	0.337557
P32119;A6NIW5;P32119-2	P32119;A6NIW5	11;7;3	10;7;3	10;7;3	Peroxiredoxin-2	PRDX2	>sp|P32119|PRDX2_HUMAN Peroxiredoxin-2 OS=Homo sapiens GN=PRDX2 PE=1 SV=5;>tr|A6NIW5|A6NIW5_HUMAN Peroxiredoxin 2, isoform CRA_a OS=Homo sapiens GN=PRDX2 PE=2 SV=2	3	11	10	10	5	10	4	9	4	9	42.4	36.9	36.9	21.892	198	198;136;142	6.97						8	15	7			5	25	1.5816e-60	0.72618	0.81095	15.585	30	0.83961	1.1366	0.184725	14.702	5	0.7131	0.7987	0.324274
Q15907;B4DMK0;P62491-2;J3KQP6;H3BMH2;H3BSC1;P62491;B4DQU5;M0R2D0;P57735	Q15907;B4DMK0;P62491-2;J3KQP6;H3BMH2;H3BSC1;P62491	11;10;9;9;9;9;9;3;1;1	11;10;9;9;9;9;9;3;1;1	11;10;9;9;9;9;9;3;1;1	Ras-related protein Rab-11B;Ras-related protein Rab-11A	RAB11B;RAB11A	>sp|Q15907|RB11B_HUMAN Ras-related protein Rab-11B OS=Homo sapiens GN=RAB11B PE=1 SV=4;>tr|B4DMK0|B4DMK0_HUMAN Ras-related protein Rab-11B OS=Homo sapiens GN=RAB11B PE=2 SV=1;>sp|P62491-2|RB11A_HUMAN Isoform 2 of Ras-related protein Rab-11A OS=Homo sapiens	10	11	11	11	1	11	1	11	1	11	57.8	57.8	57.8	24.488	218	218;179;155;155;155;198;216;146;60;213	6.81						6	13	2			2	19	2.6785e-95	0.76369	0.81753	16.221	21	0.8536	1.1237	0.168257	7.4737	2	0.76087	0.80146	0.319298
Q6DD88;F5H6I7;C9JUU1;F5GWF8	Q6DD88;F5H6I7;C9JUU1	11;10;9;3	11;10;9;3	11;10;9;3	Atlastin-3	ATL3	>sp|Q6DD88|ATLA3_HUMAN Atlastin-3 OS=Homo sapiens GN=ATL3 PE=1 SV=1;>tr|F5H6I7|F5H6I7_HUMAN Atlastin-3 OS=Homo sapiens GN=ATL3 PE=2 SV=1;>tr|C9JUU1|C9JUU1_HUMAN Atlastin-3 OS=Homo sapiens GN=ATL3 PE=2 SV=1	4	11	11	11	0	11	0	11	0	11	31.4	31.4	31.4	60.541	541	541;523;568;169	4.68			1	12	18	3						34	3.5918e-102	0.70976	0.81499	13.904	34	NaN	NaN	#VALUE!	NaN	0	0.70976	0.81499	0.295146
P04632;K7ELJ7;K7EM73;K7EIV0;K7EKD8;K7EP80;K7ES78;K7ES82;K7EK10;K7EMQ1;Q96L46	P04632;K7ELJ7;K7EM73;K7EIV0;K7EKD8	11;10;8;7;7;4;3;3;3;2;1	11;10;8;7;7;4;3;3;3;2;1	11;10;8;7;7;4;3;3;3;2;1	Calpain small subunit 1	CAPNS1	>sp|P04632|CPNS1_HUMAN Calpain small subunit 1 OS=Homo sapiens GN=CAPNS1 PE=1 SV=1;>tr|K7ELJ7|K7ELJ7_HUMAN Calpain small subunit 1 OS=Homo sapiens GN=CAPNS1 PE=4 SV=1;>tr|K7EM73|K7EM73_HUMAN Calpain small subunit 1 (Fragment) OS=Homo sapiens GN=CAPNS1 PE=4	11	11	11	11	3	11	3	11	3	11	67.5	67.5	67.5	28.315	268	268;278;163;193;238;117;72;100;122;94;248	6.58					1	20	28	1			9	41	1.1786e-180	0.77653	0.8542	20.027	50	0.89302	1.2013	0.264596	14.594	9	0.76188	0.83292	0.26375
P23919;H7C312;H7BZ20;G5E9E9;H7C3A4	P23919;H7C312;H7BZ20	11;6;6;4;2	11;6;6;4;2	11;6;6;4;2	Thymidylate kinase	DTYMK	>sp|P23919|KTHY_HUMAN Thymidylate kinase OS=Homo sapiens GN=DTYMK PE=1 SV=4;>tr|H7C312|H7C312_HUMAN Thymidylate kinase (Fragment) OS=Homo sapiens GN=DTYMK PE=4 SV=1;>tr|H7BZ20|H7BZ20_HUMAN Thymidylate kinase (Fragment) OS=Homo sapiens GN=DTYMK PE=4 SV=1	5	11	11	11	3	10	3	10	3	10	57.5	57.5	57.5	23.819	212	212;170;192;83;101	6.78						4	14				3	15	2.0155e-36	0.73182	0.84939	10.421	17	0.70296	0.99882	-0.00170339	3.3906	2	0.73182	0.84825	0.237439
Q9Y3R5-2;Q9Y3R5;F8W8U9	Q9Y3R5-2;Q9Y3R5	11;11;1	11;11;1	11;11;1	Protein dopey-2	DOPEY2	>sp|Q9Y3R5-2|DOP2_HUMAN Isoform 2 of Protein dopey-2 OS=Homo sapiens GN=DOPEY2;>sp|Q9Y3R5|DOP2_HUMAN Protein dopey-2 OS=Homo sapiens GN=DOPEY2 PE=1 SV=5	3	11	11	11	0	11	0	11	0	11	8.1	8.1	8.1	257.39	2291	2291;2298;145	1.75	6	13	1									20	9.7981e-104	0.70727	0.85336	15.508	20	NaN	NaN	#VALUE!	NaN	0	0.70727	0.85336	0.228774
O95336;M0R261;M0R0U3;M0R1L2	O95336;M0R261	11;9;5;4	11;9;5;4	11;9;5;4	6-phosphogluconolactonase	PGLS	>sp|O95336|6PGL_HUMAN 6-phosphogluconolactonase OS=Homo sapiens GN=PGLS PE=1 SV=2;>tr|M0R261|M0R261_HUMAN 6-phosphogluconolactonase (Fragment) OS=Homo sapiens GN=PGLS PE=4 SV=1	4	11	11	11	8	11	8	11	8	11	79.5	79.5	79.5	27.547	258	258;216;179;147	6.66						13	25				15	23	4.6577e-110	0.78732	0.94727	32.909	38	0.78807	1.1161	0.158466	42.047	15	0.77569	0.85398	0.227726
Q9Y224;G3V4C6;H0YJB9;G3V4E7	Q9Y224;G3V4C6;H0YJB9	11;7;6;1	11;7;6;1	11;7;6;1	UPF0568 protein C14orf166	C14orf166	>sp|Q9Y224|CN166_HUMAN UPF0568 protein C14orf166 OS=Homo sapiens GN=C14orf166 PE=1 SV=1;>tr|G3V4C6|G3V4C6_HUMAN UPF0568 protein C14orf166 OS=Homo sapiens GN=C14orf166 PE=2 SV=1;>tr|H0YJB9|H0YJB9_HUMAN UPF0568 protein C14orf166 (Fragment) OS=Homo sapiens GN	4	11	11	11	3	11	3	11	3	11	48.8	48.8	48.8	28.068	244	244;193;129;68	6.65						9	17				5	21	3.682e-80	0.77806	0.89359	10.776	26	0.74997	1.0351	0.0497702	5.8325	5	0.77853	0.87156	0.198328
E9PL01;Q15005;E9PI68;E9PRB9;H0YE04	E9PL01;Q15005;E9PI68;E9PRB9	11;11;10;6;3	11;11;10;6;3	11;11;10;6;3	Signal peptidase complex subunit 2	SPCS2	>tr|E9PL01|E9PL01_HUMAN Signal peptidase complex subunit 2 OS=Homo sapiens GN=SPCS2 PE=2 SV=1;>sp|Q15005|SPCS2_HUMAN Signal peptidase complex subunit 2 OS=Homo sapiens GN=SPCS2 PE=1 SV=3;>tr|E9PI68|E9PI68_HUMAN Signal peptidase complex subunit 2 OS=Homo sa	5	11	11	11	4	11	4	11	4	11	61.8	61.8	61.8	17.027	157	157;226;257;87;166	6.96						5	15	4			6	18	1.4248e-51	0.77883	0.9059	49.555	24	0.80807	1.1214	0.165301	87.254	6	0.76367	0.88429	0.177409
Q15181;Q5SQT6	Q15181;Q5SQT6	11;7	11;7	11;7	Inorganic pyrophosphatase	PPA1	>sp|Q15181|IPYR_HUMAN Inorganic pyrophosphatase OS=Homo sapiens GN=PPA1 PE=1 SV=2;>tr|Q5SQT6|Q5SQT6_HUMAN Inorganic pyrophosphatase OS=Homo sapiens GN=PPA1 PE=2 SV=1	2	11	11	11	3	9	3	9	3	9	51.9	51.9	51.9	32.66	289	289;178	6				1	5	13	7				8	18	3.7905e-66	0.81859	0.95512	15.969	26	0.81511	1.0806	0.111833	6.0345	8	0.81859	0.90728	0.14038
P26196	P26196	11	11	11	Probable ATP-dependent RNA helicase DDX6	DDX6	>sp|P26196|DDX6_HUMAN Probable ATP-dependent RNA helicase DDX6 OS=Homo sapiens GN=DDX6 PE=1 SV=2	1	11	11	11	3	10	3	10	3	10	38.7	38.7	38.7	54.416	483	483	5.2				3	15	6	1				6	19	1.3761e-74	0.80046	0.94797	24.274	24	0.84701	1.1423	0.191942	21.405	6	0.78308	0.90808	0.139109
Q15819;G3V113;H0YBP9;H0YBX6	Q15819;G3V113;H0YBP9	11;8;7;4	5;4;4;1	5;4;4;1	Ubiquitin-conjugating enzyme E2 variant 2	UBE2V2	>sp|Q15819|UB2V2_HUMAN Ubiquitin-conjugating enzyme E2 variant 2 OS=Homo sapiens GN=UBE2V2 PE=1 SV=4;>tr|G3V113|G3V113_HUMAN Ubiquitin-conjugating enzyme E2 variant 2 OS=Homo sapiens GN=UBE2V2 PE=2 SV=1;>tr|H0YBP9|H0YBP9_HUMAN Ubiquitin-conjugating enzyme	4	11	5	5	6	8	5	2	5	2	74.5	35.2	35.2	16.363	145	145;105;109;154	7.69							4	9			7	6	2.1736e-65	0.78438	1.02	46.104	9	0.79461	1.1174	0.160146	51.359	6	0.78438	0.90892	0.137775
O14579;M0QXB4;O14579-3;O14579-2;M0R061	O14579;M0QXB4;O14579-3;O14579-2	11;11;8;8;4	11;11;8;8;4	11;11;8;8;4	Coatomer subunit epsilon	COPE	>sp|O14579|COPE_HUMAN Coatomer subunit epsilon OS=Homo sapiens GN=COPE PE=1 SV=3;>tr|M0QXB4|M0QXB4_HUMAN Coatomer protein complex, subunit epsilon, isoform CRA_g OS=Homo sapiens GN=COPE PE=4 SV=1;>sp|O14579-3|COPE_HUMAN Isoform 3 of Coatomer subunit epsilo	5	11	11	11	2	10	2	10	2	10	51	51	51	34.482	308	308;331;256;257;146	6.38					1	13	10				2	22	7.8253e-97	0.77551	0.91334	8.4161	23	0.72787	1.0402	0.0568609	NaN	1	0.78287	0.91001	0.136046
P18085;C9JAK5;C9JPM4	P18085;C9JAK5;C9JPM4	11;9;7	7;7;3	7;7;3	ADP-ribosylation factor 4	ARF4	>sp|P18085|ARF4_HUMAN ADP-ribosylation factor 4 OS=Homo sapiens GN=ARF4 PE=1 SV=3;>tr|C9JAK5|C9JAK5_HUMAN ADP-ribosylation factor 4 OS=Homo sapiens GN=ARF4 PE=2 SV=1;>tr|C9JPM4|C9JPM4_HUMAN ADP-ribosylation factor 4 (Fragment) OS=Homo sapiens GN=ARF4 PE=2	3	11	7	7	1	11	0	7	0	7	56.7	27.8	27.8	20.511	180	180;153;127	7.79							6	6	1	1		14	3.6098e-73	0.85052	0.91364	8.8655	14	NaN	NaN	#VALUE!	NaN	0	0.85052	0.91364	0.130302
P00441;H7BYH4	P00441;H7BYH4	11;8	11;8	11;8	Superoxide dismutase [Cu-Zn]	SOD1	>sp|P00441|SODC_HUMAN Superoxide dismutase [Cu-Zn] OS=Homo sapiens GN=SOD1 PE=1 SV=2;>tr|H7BYH4|H7BYH4_HUMAN Superoxide dismutase [Cu-Zn] OS=Homo sapiens GN=SOD1 PE=2 SV=1	2	11	11	11	9	7	9	7	9	7	92.2	92.2	92.2	15.936	154	154;135	7.59						3	17	21	1	2	25	19	3.7947e-104	0.79747	0.99607	21.06	43	0.76821	1.0539	0.075738	26.375	24	0.83072	0.9178	0.123748
Q9Y265;Q9Y265-2;E7ETR0;H7C4G5;J3QLR1;H7C4I3	Q9Y265;Q9Y265-2;E7ETR0;H7C4G5	11;9;8;6;3;2	11;9;8;6;3;2	11;9;8;6;3;2	RuvB-like 1	RUVBL1	>sp|Q9Y265|RUVB1_HUMAN RuvB-like 1 OS=Homo sapiens GN=RUVBL1 PE=1 SV=1;>sp|Q9Y265-2|RUVB1_HUMAN Isoform 2 of RuvB-like 1 OS=Homo sapiens GN=RUVBL1;>tr|E7ETR0|E7ETR0_HUMAN RuvB-like 1 OS=Homo sapiens GN=RUVBL1 PE=2 SV=1;>tr|H7C4G5|H7C4G5_HUMAN RuvB-like 1 (	6	11	11	11	2	9	2	9	2	9	36.2	36.2	36.2	50.227	456	456;386;315;267;131;222	4.83				7	13	3					4	19	1.2249e-60	0.80968	0.92467	18.563	23	0.80365	1.0559	0.0784732	16.688	4	0.80968	0.92126	0.11832
Q8IWX8;J3QK89	Q8IWX8;J3QK89	11;11	11;11	11;11	Calcium homeostasis endoplasmic reticulum protein	CHERP	>sp|Q8IWX8|CHERP_HUMAN Calcium homeostasis endoplasmic reticulum protein OS=Homo sapiens GN=CHERP PE=1 SV=3;>tr|J3QK89|J3QK89_HUMAN Calcium homeostasis endoplasmic reticulum protein OS=Homo sapiens GN=CHERP PE=4 SV=1	2	11	11	11	8	5	8	5	8	5	15.2	15.2	15.2	103.7	916	916;927	3.5			12	9	1						17	5	1.9055e-18	0.75931	0.97882	14.577	22	0.74796	0.98918	-0.015695	14.763	17	0.8049	0.92407	0.113926
Q9P035;H3BS72;H3BPZ1;B4DRF4;H3BRL8;H3BMZ1	Q9P035;H3BS72;H3BPZ1;B4DRF4	11;10;9;6;4;3	11;10;9;6;4;3	11;10;9;6;4;3	Very-long-chain (3R)-3-hydroxyacyl-[acyl-carrier protein] dehydratase 3	PTPLAD1	>sp|Q9P035|HACD3_HUMAN Very-long-chain (3R)-3-hydroxyacyl-[acyl-carrier protein] dehydratase 3 OS=Homo sapiens GN=PTPLAD1 PE=1 SV=2;>tr|H3BS72|H3BS72_HUMAN Very-long-chain (3R)-3-hydroxyacyl-[acyl-carrier protein] dehydratase 3 OS=Homo sapiens GN=PTPLAD1 P	6	11	11	11	1	11	1	11	1	11	34	34	34	43.159	362	362;400;337;307;245;139	2.17	12	15	11	4							2	40	1.0546e-64	0.75911	0.94799	19.262	41	0.74092	1.0357	0.0506062	2.3519	2	0.76342	0.933	0.100051
P06493;P06493-2;E5RIU6;K7ELV5;G3V317	P06493;P06493-2	11;8;5;2;1	11;8;5;2;1	9;7;3;0;0	Cyclin-dependent kinase 1	CDK1	>sp|P06493|CDK1_HUMAN Cyclin-dependent kinase 1 OS=Homo sapiens GN=CDK1 PE=1 SV=3;>sp|P06493-2|CDK1_HUMAN Isoform 2 of Cyclin-dependent kinase 1 OS=Homo sapiens GN=CDK1	5	11	11	9	4	10	4	10	3	8	45.5	45.5	39.1	34.095	297	297;240;189;165;39	6.43					1	14	13				8	20	9.0521e-51	0.82027	0.96333	13.883	28	0.82577	1.12	0.163499	6.3395	8	0.81576	0.93537	0.0963909
Q02790;F5H120;H0YFG2;F5H1U3	Q02790	11;2;2;2	11;2;2;2	11;2;2;2	Peptidyl-prolyl cis-trans isomerase FKBP4;Peptidyl-prolyl cis-trans isomerase FKBP4, N-terminally processed	FKBP4	>sp|Q02790|FKBP4_HUMAN Peptidyl-prolyl cis-trans isomerase FKBP4 OS=Homo sapiens GN=FKBP4 PE=1 SV=3	4	11	11	11	6	6	6	6	6	6	29	29	29	51.804	459	459;51;84;86	5.09				3	14	5					12	10	1.2745e-67	0.79187	0.99124	107.61	20	0.76836	1.0332	0.0471195	7.9284	10	0.80178	0.93792	0.0924632
P35611;P35611-3;P35611-2;E7EV99;Q86XM2;A2A3N8;E7ENY0;D6RF25;H0Y9H2;D6RJE2;D6RAH3;P35612;P35612-2;P35612-8;P35612-4;P35612-3	P35611;P35611-3;P35611-2;E7EV99;Q86XM2;A2A3N8;E7ENY0	11;11;10;10;10;10;10;5;4;3;3;2;1;1;1;1	11;11;10;10;10;10;10;5;4;3;3;2;1;1;1;1	10;10;10;10;10;10;10;5;4;3;3;1;1;1;1;1	Alpha-adducin	ADD1	>sp|P35611|ADDA_HUMAN Alpha-adducin OS=Homo sapiens GN=ADD1 PE=1 SV=2;>sp|P35611-3|ADDA_HUMAN Isoform 3 of Alpha-adducin OS=Homo sapiens GN=ADD1;>sp|P35611-2|ADDA_HUMAN Isoform 2 of Alpha-adducin OS=Homo sapiens GN=ADD1;>tr|E7EV99|E7EV99_HUMAN Alpha-adduci	16	11	11	10	6	7	6	7	5	7	20.6	20.6	19.4	80.954	737	737;768;631;632;662;662;663;143;444;69;137;726;559;574;587;643	3.63			13	11	3						16	11	3.9366e-63	0.7494	0.92388	15.309	27	0.66255	0.88614	-0.174393	14.502	16	0.84	0.94893	0.0756264
Q14019;H3BT58	Q14019;H3BT58	11;8	11;8	11;8	Coactosin-like protein	COTL1	>sp|Q14019|COTL1_HUMAN Coactosin-like protein OS=Homo sapiens GN=COTL1 PE=1 SV=3;>tr|H3BT58|H3BT58_HUMAN Coactosin-like protein OS=Homo sapiens GN=COTL1 PE=2 SV=1	2	11	11	11	6	11	6	11	6	11	56.3	56.3	56.3	15.945	142	142;73	8.2						1	8	26	3	8	8	38	1.4014e-60	0.84591	0.97208	13.557	44	0.79053	1.103	0.141433	6.2487	7	0.85676	0.96009	0.0587584
O43399;O43399-5;O43399-7;O43399-2;O43399-4;O43399-3;O43399-6	O43399;O43399-5;O43399-7;O43399-2;O43399-4;O43399-3;O43399-6	11;11;11;9;9;9;6	11;11;11;9;9;9;6	11;11;11;9;9;9;6	Tumor protein D54	TPD52L2	>sp|O43399|TPD54_HUMAN Tumor protein D54 OS=Homo sapiens GN=TPD52L2 PE=1 SV=2;>sp|O43399-5|TPD54_HUMAN Isoform 5 of Tumor protein D54 OS=Homo sapiens GN=TPD52L2;>sp|O43399-7|TPD54_HUMAN Isoform 7 of Tumor protein D54 OS=Homo sapiens GN=TPD52L2;>sp|O43399-2	7	11	11	11	9	8	9	8	9	8	66.5	66.5	66.5	22.237	206	206;220;229;186;200;209;163	6.25				1	9	26	24	1			30	31	7.1451e-120	0.7553	0.9971	13.708	61	0.73701	1.0255	0.0363275	7.0169	30	0.84773	0.96854	0.0461165
E9PAU2;Q8IY67-2;Q8IY67;K7EQG2;K7EKA4;Q8IY67-3;K7EKR9;K7ERR4	E9PAU2;Q8IY67-2;Q8IY67	11;10;6;2;2;1;1;1	11;10;6;2;2;1;1;1	11;10;6;2;2;1;1;1	Ribonucleoprotein PTB-binding 1	RAVER1	>tr|E9PAU2|E9PAU2_HUMAN Ribonucleoprotein PTB-binding 1 OS=Homo sapiens GN=RAVER1 PE=4 SV=1;>sp|Q8IY67-2|RAVR1_HUMAN Isoform 2 of Ribonucleoprotein PTB-binding 1 OS=Homo sapiens GN=RAVER1;>sp|Q8IY67|RAVR1_HUMAN Ribonucleoprotein PTB-binding 1 OS=Homo sapie	8	11	11	11	8	3	8	3	8	3	31	31	31	79.578	756	756;739;606;157;157;75;96;130	4.56				11	5	1	1				15	3	1.7799e-57	0.75609	0.98495	12.671	18	0.72341	0.99169	-0.0120389	13.767	15	0.82786	0.97826	0.0317101
H0Y465;P21359-2;P21359;P21359-4;J3KSB5;B4DXH1;J3QSG6;B4DXP1;J3KSX8	H0Y465;P21359-2;P21359;P21359-4;J3KSB5	11;11;11;6;6;3;3;1;1	11;11;11;6;6;3;3;1;1	11;11;11;6;6;3;3;1;1	Neurofibromin;Neurofibromin truncated	NF1	>tr|H0Y465|H0Y465_HUMAN Neurofibromin truncated (Fragment) OS=Homo sapiens GN=NF1 PE=2 SV=1;>sp|P21359-2|NF1_HUMAN Isoform 1 of Neurofibromin OS=Homo sapiens GN=NF1;>sp|P21359|NF1_HUMAN Neurofibromin OS=Homo sapiens GN=NF1 PE=1 SV=2;>sp|P21359-4|NF1_HUMAN	9	11	11	11	0	11	0	11	0	11	6.6	6.6	6.6	281.21	2502	2502;2818;2839;1598;1656;638;640;204;206	1.81	4	11	1									16	1.5021e-70	0.8056	0.98973	24.219	16	NaN	NaN	#VALUE!	NaN	0	0.8056	0.98973	0.0148931
P27694;I3L4R8;I3L524;I3L2M5	P27694	11;5;2;2	11;5;2;2	11;5;2;2	Replication protein A 70 kDa DNA-binding subunit	RPA1	>sp|P27694|RFA1_HUMAN Replication protein A 70 kDa DNA-binding subunit OS=Homo sapiens GN=RPA1 PE=1 SV=2	4	11	11	11	5	11	5	11	5	11	26.9	26.9	26.9	68.137	616	616;313;124;153	4.53				14	16						9	21	9.315e-68	0.77423	0.98762	26.122	30	0.68254	0.93912	-0.0906186	14.005	9	0.85757	1.015	-0.0214797
Q9HDC9;Q9HDC9-2;H0Y512	Q9HDC9;Q9HDC9-2;H0Y512	11;9;9	11;9;9	11;9;9	Adipocyte plasma membrane-associated protein	APMAP	>sp|Q9HDC9|APMAP_HUMAN Adipocyte plasma membrane-associated protein OS=Homo sapiens GN=APMAP PE=1 SV=2;>sp|Q9HDC9-2|APMAP_HUMAN Isoform 2 of Adipocyte plasma membrane-associated protein OS=Homo sapiens GN=APMAP;>tr|H0Y512|H0Y512_HUMAN Adipocyte plasma memb	3	11	11	11	2	11	2	11	2	11	37.7	37.7	37.7	46.48	416	416;289;409	5.14			1	3	15	9					4	24	3.7786e-43	0.89888	1.0153	37.374	27	0.53851	0.80042	-0.321171	15.832	4	0.90769	1.0218	-0.0311128
P46060;F8W7I9;H0Y4Q3;B0QYT5;B0QYT4	P46060;F8W7I9	11;10;5;1;1	11;10;5;1;1	11;10;5;1;1	Ran GTPase-activating protein 1	RANGAP1	>sp|P46060|RAGP1_HUMAN Ran GTPase-activating protein 1 OS=Homo sapiens GN=RANGAP1 PE=1 SV=1;>tr|F8W7I9|F8W7I9_HUMAN Ran GTPase-activating protein 1 OS=Homo sapiens GN=RANGAP1 PE=2 SV=1	5	11	11	11	1	11	1	11	1	11	36.8	36.8	36.8	63.541	587	587;532;253;100;133	4.38				16	10						3	23	2.8843e-47	0.87697	1.0099	21.84	24	0.65378	0.89694	-0.156917	15.978	3	0.91551	1.0335	-0.0475384
Q15365	Q15365	11	7	7	Poly(rC)-binding protein 1	PCBP1	>sp|Q15365|PCBP1_HUMAN Poly(rC)-binding protein 1 OS=Homo sapiens GN=PCBP1 PE=1 SV=2	1	11	7	7	6	10	3	7	3	7	50.8	38.2	38.2	37.497	356	356	6.09					5	11	7				5	18	3.227e-95	0.8716	1.0119	14.186	23	0.71729	0.95095	-0.0725586	12.439	5	0.92454	1.0438	-0.0618453
[truncated: 2,723 more rows]
[truncated: 1 more columns]
