# Supplementary material for: A YAP/TAZ–ARHGAP29–RhoA Signaling Axis Regulates Podocyte Protrusions and Integrin Adhesions
Source: Cells. 2023 Jul 6;12(13):1795. doi: 10.3390/cells12131795 (PMC10340513; doi:10.3390/cells12131795)
Supplement: Supplementary file 1 [file cells-12-01795-s001.zip › Supplementary Table S3.xlsx]

## Sheet: Analysis
GeneID	ENSEMBL	SYMBOL	GENENAME	DESeq2 log2 (FC) EPB41L5 KO/WT	DESeq2 P-adj	proteome log2 FC normalized EPB41L5-KO1/WT1	proteome log2 FC normalized EPB41L5-KO2/WT2	proteome mean log2 FC	Seq and Proteome log2 FC abs.>0.5 AND significant <0.05 and proteome detected in both	CM1 mean log2 FC	CDM1 mean log2 FC	Adhesome2 Log2 FC KO/WT (replicate1)	Adhesome2 Log2 FC KO/WT (replicate2)	Adhesome2 mean log2 FC	Matrisome3	Division	Category	meta-adhesome4	consensus adhesome4	Literature-curated adhesome proteins identified in the meta-adhesome4	consensus + literature-curated adhesome4
25893	ENSG00000162722	TRIM58	tripartite motif containing 58	-5.93156	3.03973e-146																		1. Maier, J.I. et al. EPB41L5 controls podocyte extracellular matrix assembly by adhesome_x0002_dependent force transmission. Cell Rep 34, 108883 (2021).
2250	ENSG00000138675	FGF5	fibroblast growth factor 5	-1.98439	9.81343e-132						1.90514				FGF5	Matrisome-associated	Secreted Factors						2. Schell, C. et al. The FERM protein EPB41L5 regulates actomyosin contractility and focal adhesion formation to maintain the kidney filtration barrier. Proc Natl Acad Sci U S A 114, E4621-E4630 (2017).
3569	ENSG00000136244	IL6	interleukin 6	-2.27094	5.26481e-104					-1.75159					IL6	Matrisome-associated	Secreted Factors						3. Naba A, Ding H, Whittaker CA, Hynes RO. http://matrisomeproject.mit.edu
5603	ENSG00000156711	MAPK13	mitogen-activated protein kinase 13	-2.95086	3.11555e-96																		4. Horton ER, et al. Definition of a consensus integrin adhesome and its dynamics during adhesion complex assembly and disassembly. Nat Cell Biol. (2015).
1292	ENSG00000142173	COL6A2	collagen type VI alpha 2 chain	-2.76167	7.77742e-95										COL6A2	Core matrisome	Collagens	COL6A2
1191	ENSG00000120885	CLU	clusterin	2.37152	8.31444e-92					0.780387	-0.111086
9076	ENSG00000163347	CLDN1	claudin 1	-1.93044	4.61101e-88		-0.679063	-0.679063
4744	ENSG00000100285	NEFH	neurofilament heavy	-4.62054	7.09303e-87
10630	ENSG00000162493	PDPN	podoplanin	-1.92217	1.74612e-80
2591	ENSG00000115339	GALNT3	polypeptide N-acetylgalactosaminyltransferase 3	-1.91923	1.28622e-75
3488	ENSG00000115461	IGFBP5	insulin like growth factor binding protein 5	-1.98222	2.05437e-72					-1.16516	1.73307	-1.61504	-1.12898	-1.37201	IGFBP5	Core matrisome	ECM Glycoproteins	IGFBP5
4121	ENSG00000111885	MAN1A1	mannosidase alpha class 1A member 1	-3.19439	7.92737e-72
3918	ENSG00000058085	LAMC2	laminin subunit gamma 2	-2.06584	1.5834e-70					-1.70424	0.374052				LAMC2	Core matrisome	ECM Glycoproteins
257194	ENSG00000172260	NEGR1	neuronal growth regulator 1	-1.64451	1.62527e-67					-1.219	-0.590626
343172	ENSG00000177462	OR2T8	olfactory receptor family 2 subfamily T member 8	3.84328	4.39914e-67
1129	ENSG00000181072	CHRM2	cholinergic receptor muscarinic 2	3.42411	5.35606e-62
80004	ENSG00000103067	ESRP2	epithelial splicing regulatory protein 2	-2.70425	8.59402e-59
1264	ENSG00000130176	CNN1	calponin 1	1.25277	1.59518e-56	1.33503	1.35905	1.34704	YES	0.518932	-1.32639	1.0683	0.724999	0.896651				CNN1
1281	ENSG00000168542	COL3A1	collagen type III alpha 1 chain	2.7658	5.15544e-56					0.447169					COL3A1	Core matrisome	Collagens	COL3A1
3815	ENSG00000157404	KIT	KIT proto-oncogene receptor tyrosine kinase	2.89351	8.93526e-56
340578	ENSG00000198354	DCAF12L2	DDB1 and CUL4 associated factor 12 like 2	-3.96871	4.7228e-54
1004	ENSG00000113361	CDH6	cadherin 6	-2.10375	6.33724e-54					-1.55327
9510	ENSG00000154734	ADAMTS1	ADAM metallopeptidase with thrombospondin type 1 motif 1	-1.18901	2.23687e-53						0.151609				ADAMTS1	Matrisome-associated	ECM Regulators	ADAMTS1
64123	ENSG00000162618	ADGRL4	adhesion G protein-coupled receptor L4	-2.48032	2.29315e-53
595	ENSG00000110092	CCND1	cyclin D1	-1.6284	2.95221e-53
10763	ENSG00000132688	NES	nestin	-1.99931	7.72509e-53					-1.00621		-1.03196	-1.61387	-1.32292				NES
2786	ENSG00000168243	GNG4	G protein subunit gamma 4	-2.78364	6.27972e-52
8091	ENSG00000149948	HMGA2	high mobility group AT-hook 2	-1.33304	1.55295e-49	-1.42686	-1.35507	-1.39097	YES									HMGA2
4222	ENSG00000005102	MEOX1	mesenchyme homeobox 1	-2.90839	9.06341e-49
84913	ENSG00000168874	ATOH8	atonal bHLH transcription factor 8	1.38471	3.03281e-48
728215	ENSG00000204442	FAM155A	family with sequence similarity 155 member A	-2.58528	9.22413e-48
50863	ENSG00000182667	NTM	neurotrimin	-1.80721	1.14652e-47						-0.443288
11226	ENSG00000139629	GALNT6	polypeptide N-acetylgalactosaminyltransferase 6	-2.26548	6.50674e-46
182	ENSG00000101384	JAG1	jagged 1	-1.76558	8.32757e-46
81706	ENSG00000198729	PPP1R14C	protein phosphatase 1 regulatory inhibitor subunit 14C	-2.75993	1.03981e-44	0.507617		0.507617
2537	ENSG00000126709	IFI6	interferon alpha inducible protein 6	-1.99364	4.41209e-44
5328	ENSG00000122861	PLAU	plasminogen activator, urokinase	-1.13	4.00086e-43					-1.56263	0.479073				PLAU	Matrisome-associated	ECM Regulators
1525	ENSG00000154639	CXADR	CXADR, Ig-like cell adhesion molecule	2.63433	1.68539e-41
1287	ENSG00000188153	COL4A5	collagen type IV alpha 5 chain	-3.33505	2.79276e-41										COL4A5	Core matrisome	Collagens
3383	ENSG00000090339	ICAM1	intercellular adhesion molecule 1	-1.24972	6.94999e-41	-1.47017	-0.96451	-1.21734	YES	-1.049
2633	ENSG00000117228	GBP1	guanylate binding protein 1	-1.63348	1.31344e-40	-1.89663	-2.24294	-2.06978	YES	-2.12476
3397	ENSG00000125968	ID1	inhibitor of DNA binding 1, HLH protein	0.964717	1.96256e-40
3159	ENSG00000137309	HMGA1	high mobility group AT-hook 1	-0.938805	3.91014e-40	-1.04993	-1.03012	-1.04003	YES									HMGA1
3576	ENSG00000169429	CXCL8	C-X-C motif chemokine ligand 8	-1.40324	7.52709e-39										CXCL8	Matrisome-associated	Secreted Factors
5270	ENSG00000135919	SERPINE2	serpin family E member 2	-3.14018	9.49994e-39										SERPINE2	Matrisome-associated	ECM Regulators	SERPINE2
54985	ENSG00000103145	HCFC1R1	host cell factor C1 regulator 1	1.39077	1.14659e-38
6347	ENSG00000108691	CCL2	C-C motif chemokine ligand 2	-1.45345	2.73338e-38										CCL2	Matrisome-associated	Secreted Factors
3398	ENSG00000115738	ID2	inhibitor of DNA binding 2	1.1819	2.8458e-38
5010	ENSG00000013297	CLDN11	claudin 11	-2.80377	1.27422e-37
55008	ENSG00000138642	HERC6	HECT and RLD domain containing E3 ubiquitin protein ligase family member 6	-1.90689	3.16159e-37
7980	ENSG00000105825	TFPI2	tissue factor pathway inhibitor 2	-1.24437	4.59034e-37					-0.923076	-2.17371							TFPI2
217	ENSG00000111275	ALDH2	aldehyde dehydrogenase 2 family member	-1.57268	5.65319e-37					-0.520076
7052	ENSG00000198959	TGM2	transglutaminase 2	-1.30155	1.26633e-36	-1.92829	-1.70686	-1.81758	YES	-0.796474	-2.25809				TGM2	Matrisome-associated	ECM Regulators	TGM2	TGM2		TGM2
290	ENSG00000166825	ANPEP	alanyl aminopeptidase, membrane	-2.61531	3.67033e-36		-2.22956	-2.22956			-2.61056							ANPEP
6374	ENSG00000163735	CXCL5	C-X-C motif chemokine ligand 5	-1.48081	3.73566e-36					-2.5283					CXCL5	Matrisome-associated	Secreted Factors
147381	ENSG00000141668	CBLN2	cerebellin 2 precursor	1.88253	6.98332e-36										CBLN2	Matrisome-associated	Secreted Factors
4741	ENSG00000104722	NEFM	neurofilament medium	-1.82831	1.7004e-35													NEFM
9788	ENSG00000170873	MTSS1	MTSS1, I-BAR domain containing	-1.69583	2.49533e-35
81931	ENSG00000184635	ZNF93	zinc finger protein 93	2.83048	3.24249e-35
148398	ENSG00000187634	SAMD11	sterile alpha motif domain containing 11	1.37216	3.2621e-35
4323	ENSG00000157227	MMP14	matrix metallopeptidase 14	-0.787859	1.12855e-34	1.54612	1.75049	1.64831	YES						MMP14	Matrisome-associated	ECM Regulators
7546	ENSG00000043355	ZIC2	Zic family member 2	3.23322	1.148e-34
51200	ENSG00000128510	CPA4	carboxypeptidase A4	1.25996	1.148e-34		0.952573	0.952573		1.41938
3487	ENSG00000141753	IGFBP4	insulin like growth factor binding protein 4	-1.45195	1.61947e-34					-0.776136					IGFBP4	Core matrisome	ECM Glycoproteins	IGFBP4
84433	ENSG00000198286	CARD11	caspase recruitment domain family member 11	-3.29675	7.80267e-34
2825	ENSG00000183671	GPR1	G protein-coupled receptor 1	2.35097	8.425e-34
1026	ENSG00000124762	CDKN1A	cyclin dependent kinase inhibitor 1A	0.935963	1.5455e-33	1.02262	1.60612	1.31437	YES
9411	ENSG00000137962	ARHGAP29	Rho GTPase activating protein 29	-1.25216	2.52311e-33	-1.59183	-1.23223	-1.41203	YES									ARHGAP29
83987	ENSG00000169515	CCDC8	coiled-coil domain containing 8	-2.13854	2.71925e-33
6692	ENSG00000166145	SPINT1	serine peptidase inhibitor, Kunitz type 1	-2.21459	2.8073e-33					-2.0562
64321	ENSG00000164736	SOX17	SRY-box 17	-2.59613	2.61364e-32
3491	ENSG00000142871	CYR61	cysteine rich angiogenic inducer 61	-0.688248	4.47468e-32					-1.30815	0.773271	-2.09872	-0.598304	-1.34851
51435	ENSG00000168077	SCARA3	scavenger receptor class A member 3	1.66523	4.56208e-32
2152	ENSG00000117525	F3	coagulation factor III, tissue factor	-2.01218	1.69759e-31
2313	ENSG00000151702	FLI1	Fli-1 proto-oncogene, ETS transcription factor	-2.50925	3.0473e-31
9508	ENSG00000156140	ADAMTS3	ADAM metallopeptidase with thrombospondin type 1 motif 3	-1.08666	3.70517e-31					-1.61763					ADAMTS3	Matrisome-associated	ECM Regulators
10391	ENSG00000103647	CORO2B	coronin 2B	-1.48782	1.5025e-30
26253	ENSG00000166523	CLEC4E	C-type lectin domain family 4 member E	-2.79359	3.02922e-30										CLEC4E	Matrisome-associated	ECM-affiliated Proteins
80243	ENSG00000046889	PREX2	phosphatidylinositol-3,4,5-trisphosphate dependent Rac exchange factor 2	-2.71248	1.27303e-29
8829	ENSG00000099250	NRP1	neuropilin 1	0.889392	1.76747e-29	0.295958	0.38743	0.341694		1.52416
2882	ENSG00000116157	GPX7	glutathione peroxidase 7	-3.02833	1.9325e-29
4322	ENSG00000137745	MMP13	matrix metallopeptidase 13	2.20088	2.11659e-29										MMP13	Matrisome-associated	ECM Regulators
6482	ENSG00000008513	ST3GAL1	ST3 beta-galactoside alpha-2,3-sialyltransferase 1	-1.272	2.15444e-29					-1.16121
79413	ENSG00000177494	ZBED2	zinc finger BED-type containing 2	-1.54463	2.15444e-29
64881	ENSG00000280165	PCDH20	protocadherin 20	-1.21745	7.56382e-29					-0.844509
55092	ENSG00000171729	TMEM51	transmembrane protein 51	-1.12188	8.26643e-29
4257	ENSG00000008394	MGST1	microsomal glutathione S-transferase 1	-1.84498	8.54762e-29
8482	ENSG00000138623	SEMA7A	semaphorin 7A (John Milton Hagen blood group)	-1.06289	1.36761e-28					-0.376732	-1.06667				SEMA7A	Matrisome-associated	ECM-affiliated Proteins
114795	ENSG00000139364	TMEM132B	transmembrane protein 132B	2.41003	1.36761e-28
6387	ENSG00000107562	CXCL12	C-X-C motif chemokine ligand 12	2.08689	1.40876e-28										CXCL12	Matrisome-associated	Secreted Factors	CXCL12
3037	ENSG00000170961	HAS2	hyaluronan synthase 2	-2.06496	2.00314e-28
2919	ENSG00000163739	CXCL1	C-X-C motif chemokine ligand 1	-1.59094	3.29606e-28		-4.97728	-4.97728							CXCL1	Matrisome-associated	Secreted Factors
285704	ENSG00000174136	RGMB	repulsive guidance molecule BMP co-receptor b	-1.07171	3.29606e-28
2878	ENSG00000211445	GPX3	glutathione peroxidase 3	-1.65973	9.9334e-28
1839	ENSG00000113070	HBEGF	heparin binding EGF like growth factor	-1.16073	1.20395e-27										HBEGF	Matrisome-associated	Secreted Factors
2242	ENSG00000182511	FES	FES proto-oncogene, tyrosine kinase	-2.46072	1.62497e-27
79009	ENSG00000107625	DDX50	DExD-box helicase 50	0.837424	2.37904e-27													DDX50
55765	ENSG00000163362	INAVA	innate immunity activator	-1.34992	2.84304e-27
1009	ENSG00000140937	CDH11	cadherin 11	-1.91091	7.05619e-27													CDH11
3732	ENSG00000085117	CD82	CD82 molecule	-0.901665	7.23891e-27	0.662661	0.408742	0.535702
2861	ENSG00000170775	GPR37	G protein-coupled receptor 37	-2.91733	1.08245e-26
4060	ENSG00000139329	LUM	lumican	0.822777	1.88485e-26					-0.76823					LUM	Core matrisome	Proteoglycans
23400	ENSG00000159363	ATP13A2	ATPase cation transporting 13A2	-0.95561	2.54098e-26
2308	ENSG00000150907	FOXO1	forkhead box O1	-1.9535	3.42231e-26
1301	ENSG00000060718	COL11A1	collagen type XI alpha 1 chain	-1.19329	6.13208e-26					-1.3504					COL11A1	Core matrisome	Collagens	COL11A1
386618	ENSG00000180332	KCTD4	potassium channel tetramerization domain containing 4	1.56663	6.97569e-26
2752	ENSG00000135821	GLUL	glutamate-ammonia ligase	-3.04587	7.1785e-26
122786	ENSG00000139926	FRMD6	FERM domain containing 6	-0.818671	7.34758e-26
64115	ENSG00000107738	VSIR	V-set immunoregulatory receptor	1.29661	8.06441e-26
6582	ENSG00000112499	SLC22A2	solute carrier family 22 member 2	-2.90848	9.63063e-26
7099	ENSG00000136869	TLR4	toll like receptor 4	-2.9598	9.71384e-26
11182	ENSG00000160326	SLC2A6	solute carrier family 2 member 6	-0.959559	9.98533e-26
80144	ENSG00000138759	FRAS1	Fraser extracellular matrix complex subunit 1	-2.50115	1.07329e-25										FRAS1	Core matrisome	ECM Glycoproteins
23550	ENSG00000125637	PSD4	pleckstrin and Sec7 domain containing 4	-2.06922	1.23182e-25
115207	ENSG00000178695	KCTD12	potassium channel tetramerization domain containing 12	-1.87307	1.23182e-25
3773	ENSG00000153822	KCNJ16	potassium voltage-gated channel subfamily J member 16	-2.25338	1.41076e-25
3936	ENSG00000136167	LCP1	lymphocyte cytosolic protein 1	-1.73176	1.71808e-25	-2.75692	-2.88792	-2.82242	YES	-2.03255								LCP1
8425	ENSG00000090006	LTBP4	latent transforming growth factor beta binding protein 4	-0.888818	2.47796e-25					-0.0355394	0.543084	-2.01039	-1.08933	-1.54986	LTBP4	Core matrisome	ECM Glycoproteins
84141	ENSG00000115363	EVA1A	eva-1 homolog A, regulator of programmed cell death	-1.10033	2.52179e-25		-0.208892	-0.208892
9315	ENSG00000134986	NREP	neuronal regeneration related protein	0.753468	3.52236e-25
1278	ENSG00000164692	COL1A2	collagen type I alpha 2 chain	-2.86745	4.36665e-25					-0.962223					COL1A2	Core matrisome	Collagens	COL1A2
205	ENSG00000162433	AK4	adenylate kinase 4	-1.00989	6.59788e-25	-1.17228	-1.14679	-1.15953	YES
6662	ENSG00000125398	SOX9	SRY-box 9	-1.99145	6.69473e-25
3959	ENSG00000108679	LGALS3BP	galectin 3 binding protein	-0.658867	8.9917e-25		-0.610322	-0.610322		-0.503996
1435	ENSG00000184371	CSF1	colony stimulating factor 1	-1.31613	9.44812e-25					-1.25173					CSF1	Matrisome-associated	Secreted Factors
81848	ENSG00000187678	SPRY4	sprouty RTK signaling antagonist 4	-1.73469	1.05485e-24													SPRY4
4790	ENSG00000109320	NFKB1	nuclear factor kappa B subunit 1	-0.768701	1.63823e-24					-1.354
81029	ENSG00000111186	WNT5B	Wnt family member 5B	-1.68684	1.68057e-24						1.18527				WNT5B	Matrisome-associated	Secreted Factors
9568	ENSG00000136928	GABBR2	gamma-aminobutyric acid type B receptor subunit 2	-2.09438	2.18535e-24
1490	ENSG00000118523	CTGF	connective tissue growth factor	-1.49942	7.25878e-24					-1.4096	1.68316	-0.429107	0.27274	-0.0781836
1912	ENSG00000134686	PHC2	polyhomeotic homolog 2	-0.737182	9.08427e-24
10318	ENSG00000145901	TNIP1	TNFAIP3 interacting protein 1	-0.874802	9.18022e-24
90139	ENSG00000157570	TSPAN18	tetraspanin 18	-2.10509	9.28861e-24
259307	ENSG00000104951	IL4I1	interleukin 4 induced 1	-1.43699	9.74186e-24	-1.47265	-3.77821	-2.62543	YES
8776	ENSG00000063601	MTMR1	myotubularin related protein 1	-0.900031	1.03412e-23
80310	ENSG00000170962	PDGFD	platelet derived growth factor D	-2.77086	1.99616e-23										PDGFD	Matrisome-associated	Secreted Factors
221	ENSG00000006534	ALDH3B1	aldehyde dehydrogenase 3 family member B1	0.912822	2.61503e-23
4825	ENSG00000163623	NKX6-1	NK6 homeobox 1	-1.8049	3.50601e-23
397	ENSG00000111348	ARHGDIB	Rho GDP dissociation inhibitor beta	-1.61354	4.30388e-23
56654	ENSG00000107281	NPDC1	neural proliferation, differentiation and control 1	-1.48855	4.30388e-23
80781	ENSG00000182871	COL18A1	collagen type XVIII alpha 1 chain	-1.16012	4.91678e-23		1.39297	1.39297		0.0482716	0.172066				COL18A1	Core matrisome	Collagens	COL18A1
84898	ENSG00000120594	PLXDC2	plexin domain containing 2	-2.828	5.76223e-23										PLXDC2	Matrisome-associated	ECM-affiliated Proteins
2290	ENSG00000176165	FOXG1	forkhead box G1	-2.84952	6.01448e-23
84230	ENSG00000171488	LRRC8C	leucine rich repeat containing 8 VRAC subunit C	-1.77629	6.01448e-23													LRRC8C
27069	ENSG00000165678	GHITM	growth hormone inducible transmembrane protein	0.743549	7.30998e-23		0.544666	0.544666
5329	ENSG00000011422	PLAUR	plasminogen activator, urokinase receptor	-0.969462	9.16012e-23					0.918602
9830	ENSG00000106785	TRIM14	tripartite motif containing 14	-1.00379	9.68202e-23
55165	ENSG00000138180	CEP55	centrosomal protein 55	0.855698	1.54277e-22
127294	ENSG00000142661	MYOM3	myomesin 3	-1.13008	1.55379e-22
4599	ENSG00000157601	MX1	MX dynamin like GTPase 1	-2.25303	1.57428e-22		-2.78262	-2.78262
114793	ENSG00000157827	FMNL2	formin like 2	-1.13071	1.57577e-22													FMNL2
2150	ENSG00000164251	F2RL1	F2R like trypsin receptor 1	-1.1252	1.8989e-22
57574	ENSG00000144583	MARCH4	membrane associated ring-CH-type finger 4	-1.71271	3.40982e-22
983	ENSG00000170312	CDK1	cyclin dependent kinase 1	0.809173	3.68907e-22	0.163499	0.0963909	0.129945		0.296752		0.997319	0.476019	0.736669
79623	ENSG00000158089	GALNT14	polypeptide N-acetylgalactosaminyltransferase 14	-0.922661	5.10675e-22
9529	ENSG00000166170	BAG5	BCL2 associated athanogene 5	-0.769935	1.10375e-21
3613	ENSG00000141401	IMPA2	inositol monophosphatase 2	1.52782	1.12878e-21
3352	ENSG00000179546	HTR1D	5-hydroxytryptamine receptor 1D	-2.50668	1.34466e-21
64135	ENSG00000115267	IFIH1	interferon induced with helicase C domain 1	-1.81853	1.40111e-21
343171	ENSG00000238243	OR2W3	olfactory receptor family 2 subfamily W member 3	-2.74641	1.47674e-21
1282	ENSG00000187498	COL4A1	collagen type IV alpha 1 chain	-1.15375	1.53063e-21	1.4499	1.36907	1.40949	YES	-0.638367	-0.0290901				COL4A1	Core matrisome	Collagens	COL4A1
26037	ENSG00000197555	SIPA1L1	signal induced proliferation associated 1 like 1	-1.18544	1.53063e-21
3006	ENSG00000187837	HIST1H1C	histone cluster 1 H1 family member c	1.00642	1.85312e-21	0.757706	1.16027	0.958986	YES	1.14601	-0.164297							HIST1H1C
3912	ENSG00000091136	LAMB1	laminin subunit beta 1	-0.662487	1.88223e-21		-0.0203422	-0.0203422		0.816885					LAMB1	Core matrisome	ECM Glycoproteins	LAMB1
1027	ENSG00000111276	CDKN1B	cyclin dependent kinase inhibitor 1B	0.627549	2.57833e-21
219743	ENSG00000156521	TYSND1	trypsin domain containing 1	1.06226	2.58454e-21
27242	ENSG00000146072	TNFRSF21	TNF receptor superfamily member 21	-1.16199	2.59705e-21
22808	ENSG00000158186	MRAS	muscle RAS oncogene homolog	0.789716	4.16985e-21
23616	ENSG00000100092	SH3BP1	SH3 domain binding protein 1	-1.03436	4.88275e-21	-1.6092		-1.6092										SH3BP1
837	ENSG00000196954	CASP4	caspase 4	-1.20921	5.40154e-21
5563	ENSG00000162409	PRKAA2	protein kinase AMP-activated catalytic subunit alpha 2	-2.29904	6.2599e-21
6251	ENSG00000148484	RSU1	Ras suppressor protein 1	0.828623	6.75226e-21		0.779967	0.779967		0.173326		-0.225152	0.13829	-0.0434306				RSU1	RSU1
84632	ENSG00000169129	AFAP1L2	actin filament associated protein 1 like 2	0.815554	7.5327e-21		0.581281	0.581281										AFAP1L2
3099	ENSG00000159399	HK2	hexokinase 2	-1.32832	1.15878e-20													HK2
64207	ENSG00000119669	IRF2BPL	interferon regulatory factor 2 binding protein like	-0.806528	1.29979e-20	-0.177001		-0.177001		1.15083								IRF2BPL
1969	ENSG00000142627	EPHA2	EPH receptor A2	-0.79947	1.6973e-20	0.295841	0.507583	0.401712				-1.07121	-0.0453272	-0.55827
10388	ENSG00000196074	SYCP2	synaptonemal complex protein 2	0.825854	2.23724e-20
7474	ENSG00000114251	WNT5A	Wnt family member 5A	-0.814359	2.54455e-20						-0.589254				WNT5A	Matrisome-associated	Secreted Factors
79180	ENSG00000142634	EFHD2	EF-hand domain family member D2	-0.685099	2.54646e-20		-1.88127	-1.88127		-1.1845								EFHD2
55890	ENSG00000170412	GPRC5C	G protein-coupled receptor class C group 5 member C	1.62416	2.64954e-20
3772	ENSG00000157551	KCNJ15	potassium voltage-gated channel subfamily J member 15	1.90625	2.70496e-20
54751	ENSG00000162458	FBLIM1	filamin binding LIM protein 1	-0.754897	3.01055e-20	0.16633	0.290268	0.228299		-0.612678		-0.479644	-0.0871509	-0.283398				FBLIM1	FBLIM1	FBLIM1	FBLIM1
4213	NA	MEIS3P1	Meis homeobox 3 pseudogene 1	-1.12906	3.51527e-20
2125	ENSG00000167880	EVPL	envoplakin	-0.951962	3.58602e-20
25797	ENSG00000115828	QPCT	glutaminyl-peptide cyclotransferase	-1.27081	3.63262e-20					-1.26341
7128	ENSG00000118503	TNFAIP3	TNF alpha induced protein 3	-1.22532	3.78585e-20
22837	ENSG00000082438	COBLL1	cordon-bleu WH2 repeat protein like 1	-1.00921	4.94768e-20	0.28404	0.627003	0.455522										COBLL1
89795	ENSG00000067798	NAV3	neuron navigator 3	-1.67918	5.42598e-20
8706	ENSG00000169255	B3GALNT1	beta-1,3-N-acetylgalactosaminyltransferase 1 (globoside blood group)	-1.23645	5.59342e-20
10367	ENSG00000107745	MICU1	mitochondrial calcium uptake 1	0.687412	6.25577e-20	0.516419	0.785303	0.650861	YES
58191	ENSG00000161921	CXCL16	C-X-C motif chemokine ligand 16	-1.32605	1.06169e-19					-1.64648
4053	ENSG00000119681	LTBP2	latent transforming growth factor beta binding protein 2	-1.69787	1.23181e-19					-0.468152	1.06942				LTBP2	Core matrisome	ECM Glycoproteins	LTBP2
55760	ENSG00000089876	DHX32	DEAH-box helicase 32 (putative)	0.948661	1.29238e-19
1152	ENSG00000166165	CKB	creatine kinase B	-1.01389	1.83151e-19	-2.35262	-2.49623	-2.42443	YES	-1.08188
29767	ENSG00000128872	TMOD2	tropomodulin 2	1.35539	2.27354e-19
155185	ENSG00000174945	AMZ1	archaelysin family metallopeptidase 1	-1.10034	2.32554e-19
7162	ENSG00000146242	TPBG	trophoblast glycoprotein	-0.824882	2.75355e-19	-0.943278		-0.943278
64866	ENSG00000163814	CDCP1	CUB domain containing protein 1	-1.07449	3.05448e-19	-0.357751	0.077452	-0.14015
4609	ENSG00000136997	MYC	MYC proto-oncogene, bHLH transcription factor	-0.756881	3.25387e-19
93664	ENSG00000081803	CADPS2	calcium dependent secretion activator 2	-2.52431	3.54908e-19
30820	ENSG00000182132	KCNIP1	potassium voltage-gated channel interacting protein 1	1.29841	3.97736e-19
7037	ENSG00000072274	TFRC	transferrin receptor	-0.68401	4.15742e-19	-0.945749	-0.903115	-0.924432	YES			-1.58284	-1.42604	-1.50444				TFRC
2581	ENSG00000054983	GALC	galactosylceramidase	-0.757497	5.90843e-19		-0.892818	-0.892818		-0.0436199
11322	ENSG00000141524	TMC6	transmembrane channel like 6	-1.26491	6.33072e-19
3431	ENSG00000135899	SP110	SP110 nuclear body protein	-1.2703	6.96057e-19
124976	ENSG00000183018	SPNS2	sphingolipid transporter 2	-0.89228	7.25008e-19
10561	ENSG00000137965	IFI44	interferon induced protein 44	-2.028	7.52588e-19
338761	ENSG00000186897	C1QL4	complement C1q like 4	0.765377	7.808e-19										C1QL4	Matrisome-associated	ECM-affiliated Proteins
3589	ENSG00000095752	IL11	interleukin 11	-0.75225	8.79828e-19										IL11	Matrisome-associated	Secreted Factors
79642	ENSG00000180801	ARSJ	arylsulfatase family member J	-0.993337	1.00094e-18						0.492003
54509	ENSG00000139725	RHOF	ras homolog family member F, filopodia associated	-1.16219	1.10906e-18
5587	ENSG00000184304	PRKD1	protein kinase D1	-1.76784	1.12508e-18
2048	ENSG00000133216	EPHB2	EPH receptor B2	-0.860445	1.72305e-18					-0.804337
2263	ENSG00000066468	FGFR2	fibroblast growth factor receptor 2	2.51471	1.80434e-18
4739	ENSG00000111859	NEDD9	neural precursor cell expressed, developmentally down-regulated 9	-0.912869	2.03139e-18
1593	ENSG00000135929	CYP27A1	cytochrome P450 family 27 subfamily A member 1	-1.34402	2.2384e-18
56937	ENSG00000124225	PMEPA1	prostate transmembrane protein, androgen induced 1	-0.712041	2.26003e-18
11031	ENSG00000168461	RAB31	RAB31, member RAS oncogene family	0.627546	2.29887e-18		0.39227	0.39227										RAB31
4982	ENSG00000164761	TNFRSF11B	TNF receptor superfamily member 11b	-1.63979	2.6188e-18													TNFRSF11B
10893	ENSG00000125966	MMP24	matrix metallopeptidase 24	0.68435	2.63428e-18										MMP24	Matrisome-associated	ECM Regulators
5293	ENSG00000171608	PIK3CD	phosphatidylinositol-4,5-bisphosphate 3-kinase catalytic subunit delta	-0.766069	2.8828e-18
404636	ENSG00000119979	FAM45A	family with sequence similarity 45 member A	0.722711	2.90686e-18													FAM45A
5787	ENSG00000127329	PTPRB	protein tyrosine phosphatase, receptor type B	-1.30748	3.23281e-18
1404	ENSG00000145681	HAPLN1	hyaluronan and proteoglycan link protein 1	0.680653	3.50487e-18					1.14932					HAPLN1	Core matrisome	Proteoglycans
9242	ENSG00000178860	MSC	musculin	-1.00117	3.50487e-18
64421	ENSG00000152457	DCLRE1C	DNA cross-link repair 1C	0.826061	3.58915e-18
4688	ENSG00000116701	NCF2	neutrophil cytosolic factor 2	-1.23809	3.74146e-18
4907	ENSG00000135318	NT5E	5'-nucleotidase ecto	-0.848715	4.32584e-18						-0.90645							NT5E
58494	ENSG00000154721	JAM2	junctional adhesion molecule 2	-1.75485	4.32584e-18
347733	ENSG00000137285	TUBB2B	tubulin beta 2B class IIb	0.938517	4.54938e-18	1.36384	0.772259	1.06805	YES
4942	ENSG00000065154	OAT	ornithine aminotransferase	0.693432	4.86173e-18	0.253021	0.0969309	0.174976										OAT
124359	ENSG00000166446	CDYL2	chromodomain Y like 2	-1.64706	5.37463e-18
3206	ENSG00000253293	HOXA10	homeobox A10	0.708407	5.595e-18
348938	ENSG00000172548	NIPAL4	NIPA like domain containing 4	-2.01443	5.61519e-18
114805	ENSG00000144278	GALNT13	polypeptide N-acetylgalactosaminyltransferase 13	-2.30581	5.86567e-18
4792	ENSG00000100906	NFKBIA	NFKB inhibitor alpha	-0.768237	6.1977e-18
5452	ENSG00000028277	POU2F2	POU class 2 homeobox 2	-1.82529	7.2546e-18
53340	ENSG00000064199	SPA17	sperm autoantigenic protein 17	0.907515	7.56113e-18
23586	ENSG00000107201	DDX58	DExD/H-box helicase 58	-1.22403	7.92515e-18
3229	ENSG00000123364	HOXC13	homeobox C13	2.18544	8.33824e-18
57491	ENSG00000063438	AHRR	aryl-hydrocarbon receptor repressor	0.981062	8.53965e-18
8835	ENSG00000120833	SOCS2	suppressor of cytokine signaling 2	0.922427	9.30327e-18
38	ENSG00000075239	ACAT1	acetyl-CoA acetyltransferase 1	0.935316	9.63136e-18	0.420617	0.44603	0.433324		0.843351								ACAT1
64399	ENSG00000164161	HHIP	hedgehog interacting protein	-1.44838	1.05742e-17										HHIP	Matrisome-associated	Secreted Factors
1889	ENSG00000117298	ECE1	endothelin converting enzyme 1	-0.822726	1.23491e-17	-0.0566562	-0.341872	-0.199264
389792	ENSG00000188483	IER5L	immediate early response 5 like	0.894933	1.48895e-17
79669	ENSG00000114529	C3orf52	chromosome 3 open reading frame 52	-0.720189	1.65967e-17
201799	ENSG00000170006	TMEM154	transmembrane protein 154	-1.2676	1.65967e-17
266977	ENSG00000153292	ADGRF1	adhesion G protein-coupled receptor F1	-1.60056	2.33491e-17
157695	ENSG00000180190	TDRP	testis development related protein	-1.05454	2.46376e-17
958	ENSG00000101017	CD40	CD40 molecule	-0.859526	2.59701e-17
56034	ENSG00000145431	PDGFC	platelet derived growth factor C	-0.706956	2.60283e-17					-1.07694	0.39846				PDGFC	Matrisome-associated	Secreted Factors
7185	ENSG00000056558	TRAF1	TNF receptor associated factor 1	-1.41124	2.99425e-17
7272	ENSG00000112742	TTK	TTK protein kinase	0.646515	2.99425e-17
101410538	ENSG00000126005	MMP24OS	MMP24 opposite strand	0.695899	3.10272e-17
64332	ENSG00000144802	NFKBIZ	NFKB inhibitor zeta	-0.742612	3.4265e-17
9760	ENSG00000198846	TOX	thymocyte selection associated high mobility group box	-1.61735	3.53191e-17
6288	ENSG00000173432	SAA1	serum amyloid A1	-1.45103	3.54847e-17					-2.57099
3090	ENSG00000177374	HIC1	HIC ZBTB transcriptional repressor 1	-1.51151	3.89516e-17
9435	ENSG00000175040	CHST2	carbohydrate sulfotransferase 2	-1.13062	5.13988e-17
80830	ENSG00000221963	APOL6	apolipoprotein L6	-1.47379	5.52139e-17
972	ENSG00000019582	CD74	CD74 molecule	-0.854711	5.72805e-17
219	ENSG00000137124	ALDH1B1	aldehyde dehydrogenase 1 family member B1	-0.92391	6.25432e-17	0.222805	0.204832	0.213818		-0.231962		-2.32861	-2.39836	-2.36348				ALDH1B1
23507	ENSG00000197147	LRRC8B	leucine rich repeat containing 8 VRAC subunit B	-1.84642	6.52991e-17
4940	ENSG00000111331	OAS3	2'-5'-oligoadenylate synthetase 3	-1.16649	7.2319e-17	-2.32952	-1.64847	-1.98899	YES
3400	ENSG00000172201	ID4	inhibitor of DNA binding 4, HLH protein	1.11391	8.35804e-17
23635	ENSG00000145687	SSBP2	single stranded DNA binding protein 2	1.21971	8.36193e-17
87	ENSG00000072110	ACTN1	actinin alpha 1	-0.923121	8.85851e-17	0.0799754	-0.461633	-0.190829		-0.329838	-1.98129	-0.599127	-0.413653	-0.50639				ACTN1	ACTN1	ACTN1	ACTN1
9112	ENSG00000182979	MTA1	metastasis associated 1	-0.642782	9.29396e-17													MTA1
8613	ENSG00000162407	PLPP3	phospholipid phosphatase 3	1.47327	1.12641e-16
84930	ENSG00000120539	MASTL	microtubule associated serine/threonine kinase like	0.776459	1.23492e-16
2118	ENSG00000175832	ETV4	ETS variant 4	-1.11523	1.53436e-16
100133941	ENSG00000272398	CD24	CD24 molecule	0.721177	2.33316e-16
9200	ENSG00000165996	HACD1	3-hydroxyacyl-CoA dehydratase 1	0.849839	2.80973e-16
3875	ENSG00000111057	KRT18	keratin 18	-0.71784	2.87651e-16	-0.637109	-0.693409	-0.665259	YES	-0.460178	-1.20818	-0.649937	-1.074	-0.861969				KRT18
65061	ENSG00000138395	CDK15	cyclin dependent kinase 15	0.774083	3.17744e-16
64761	ENSG00000059378	PARP12	poly(ADP-ribose) polymerase family member 12	-0.928653	3.23206e-16
23516	ENSG00000104635	SLC39A14	solute carrier family 39 member 14	-0.543187	3.23513e-16
1503	ENSG00000171793	CTPS1	CTP synthase 1	-0.562709	3.36316e-16		-0.897008	-0.897008		-0.871193								CTPS1
5371	ENSG00000140464	PML	promyelocytic leukemia	-0.933601	3.41652e-16	-0.267583	-0.366812	-0.317197		-0.330273								PML
3169	ENSG00000129514	FOXA1	forkhead box A1	-2.30798	3.6834e-16
114801	ENSG00000164484	TMEM200A	transmembrane protein 200A	-2.37493	4.37003e-16
440193	ENSG00000015133	CCDC88C	coiled-coil domain containing 88C	-2.01909	4.48832e-16
6924	ENSG00000011007	ELOA	elongin A	-0.668788	4.59622e-16
23141	ENSG00000176915	ANKLE2	ankyrin repeat and LEM domain containing 2	-0.558288	4.95185e-16
256691	ENSG00000165072	MAMDC2	MAM domain containing 2	-1.7285	5.20916e-16					-0.563967								MAMDC2
200734	ENSG00000198369	SPRED2	sprouty related EVH1 domain containing 2	-0.911688	5.70043e-16
55072	ENSG00000092098	RNF31	ring finger protein 31	-0.665239	5.98047e-16
51477	ENSG00000105655	ISYNA1	inositol-3-phosphate synthase 1	-1.06265	6.75583e-16
8542	ENSG00000100342	APOL1	apolipoprotein L1	-0.986731	6.89754e-16
6229	ENSG00000138326	RPS24	ribosomal protein S24	0.995433	7.61614e-16	-0.287501	-0.355806	-0.321653		0.152427	-0.1995							RPS24
79974	ENSG00000106034	CPED1	cadherin like and PC-esterase domain containing 1	-1.51015	8.7943e-16
1690	ENSG00000100473	COCH	cochlin	-0.751937	9.50386e-16					-1.09837					COCH	Core matrisome	ECM Glycoproteins
22871	ENSG00000169760	NLGN1	neuroligin 1	-1.72775	9.50386e-16
2348	ENSG00000110195	FOLR1	folate receptor 1	1.6003	1.03506e-15
9056	ENSG00000155465	SLC7A7	solute carrier family 7 member 7	-1.00724	1.04447e-15
10620	ENSG00000179361	ARID3B	AT-rich interaction domain 3B	-0.931289	1.10109e-15
7057	ENSG00000137801	THBS1	thrombospondin 1	-1.30916	1.11301e-15					-0.935772					THBS1	Core matrisome	ECM Glycoproteins	THBS1
51076	ENSG00000119929	CUTC	cutC copper transporter	0.985194	1.14935e-15					0.832867
1763	ENSG00000138346	DNA2	DNA replication helicase/nuclease 2	0.632634	1.1698e-15
1643	ENSG00000134574	DDB2	damage specific DNA binding protein 2	0.760829	1.18275e-15	0.238175	0.425482	0.331829		1.25072
55601	ENSG00000137628	DDX60	DExD/H-box helicase 60	-1.18527	1.4149e-15		-1.91556	-1.91556
23548	ENSG00000113638	TTC33	tetratricopeptide repeat domain 33	0.810967	1.79438e-15
375033	ENSG00000187800	PEAR1	platelet endothelial aggregation receptor 1	-1.25039	2.52771e-15
7075	ENSG00000066056	TIE1	tyrosine kinase with immunoglobulin like and EGF like domains 1	-1.90993	2.61782e-15
509	ENSG00000165629	ATP5F1C	ATP synthase F1 subunit gamma	1.00604	2.82653e-15
10371	ENSG00000075213	SEMA3A	semaphorin 3A	-1.09187	3.04583e-15										SEMA3A	Matrisome-associated	ECM-affiliated Proteins	SEMA3A
54739	ENSG00000132530	XAF1	XIAP associated factor 1	-2.15889	3.15162e-15
27237	ENSG00000130762	ARHGEF16	Rho guanine nucleotide exchange factor 16	-1.74016	3.24443e-15
5641	ENSG00000100600	LGMN	legumain	-0.705281	3.27203e-15		-0.643949	-0.643949		0.766519
59274	ENSG00000140406	TLNRD1	talin rod domain containing 1	-0.711958	3.27203e-15
1837	ENSG00000134769	DTNA	dystrobrevin alpha	-1.24769	3.32883e-15
7102	ENSG00000156298	TSPAN7	tetraspanin 7	-2.02071	3.44466e-15
3725	ENSG00000177606	JUN	Jun proto-oncogene, AP-1 transcription factor subunit	-0.618423	3.56142e-15	-0.565652		-0.565652
81855	ENSG00000107819	SFXN3	sideroflexin 3	0.638385	3.66047e-15	0.991826	0.438307	0.715066										SFXN3
55966	ENSG00000196581	AJAP1	adherens junctions associated protein 1	1.32747	3.67474e-15
79711	ENSG00000196497	IPO4	importin 4	-0.594864	3.70957e-15		-1.01378	-1.01378		-0.464076								IPO4
403	ENSG00000138175	ARL3	ADP ribosylation factor like GTPase 3	0.827601	3.73118e-15	0.60046	0.518391	0.559426	YES	0.219447
92906	ENSG00000143889	HNRNPLL	heterogeneous nuclear ribonucleoprotein L like	1.01697	3.77685e-15													HNRNPLL
23780	ENSG00000128335	APOL2	apolipoprotein L2	-0.760015	4.017e-15	-0.142847	0.108037	-0.0174053										APOL2
55872	ENSG00000168078	PBK	PDZ binding kinase	0.704102	4.31168e-15	0.253263		0.253263		0.339878
57685	ENSG00000158966	CACHD1	cache domain containing 1	-1.19129	4.32383e-15
9474	ENSG00000057663	ATG5	autophagy related 5	0.624148	4.37123e-15
440482	NA	ANKRD20A5P	ankyrin repeat domain 20 family member A5, pseudogene	1.55902	4.83697e-15
139818	ENSG00000147251	DOCK11	dedicator of cytokinesis 11	0.918362	6.17979e-15
29995	ENSG00000071282	LMCD1	LIM and cysteine rich domains 1	-0.660994	6.2301e-15	1.17044	1.47073	1.32058	YES	-0.708496		0.745406	0.295135	0.520271				LMCD1
56833	ENSG00000158714	SLAMF8	SLAM family member 8	-2.28082	6.56802e-15
64750	ENSG00000108854	SMURF2	SMAD specific E3 ubiquitin protein ligase 2	-0.661592	6.7553e-15
3831	ENSG00000126214	KLC1	kinesin light chain 1	-0.533163	7.45304e-15	-0.0433039	-0.0103502	-0.0268271		-0.359857								KLC1
79729	ENSG00000214193	SH3D21	SH3 domain containing 21	-1.74198	7.45304e-15
29775	ENSG00000100065	CARD10	caspase recruitment domain family member 10	0.588604	7.91297e-15
3422	ENSG00000067064	IDI1	isopentenyl-diphosphate delta isomerase 1	0.577337	8.01509e-15		0.404324	0.404324		-0.466863								IDI1
1983	ENSG00000100664	EIF5	eukaryotic translation initiation factor 5	-0.540607	8.03164e-15	-0.218095	-0.543496	-0.380795		-0.685148								EIF5
311	ENSG00000122359	ANXA11	annexin A11	0.479731	8.0931e-15	0.455123	0.543614	0.499369		0.673402					ANXA11	Matrisome-associated	ECM-affiliated Proteins	ANXA11
23225	ENSG00000132182	NUP210	nucleoporin 210	-0.848349	8.12431e-15		-2.1476	-2.1476										NUP210
147947	ENSG00000240225	ZNF542P	zinc finger protein 542, pseudogene	-2.18627	8.49203e-15
771	ENSG00000074410	CA12	carbonic anhydrase 12	-1.05565	8.85672e-15
4293	ENSG00000006432	MAP3K9	mitogen-activated protein kinase kinase kinase 9	-1.09497	9.10184e-15
58504	ENSG00000128805	ARHGAP22	Rho GTPase activating protein 22	-0.951778	9.3871e-15													ARHGAP22
399726	ENSG00000204682	CASC10	cancer susceptibility 10	1.35413	9.3871e-15
5223	ENSG00000171314	PGAM1	phosphoglycerate mutase 1	0.483628	9.576e-15	0.205893	0.342433	0.274163		0.0251916								PGAM1
3690	ENSG00000259207	ITGB3	integrin subunit beta 3	-1.02761	1.0034e-14	-1.03715	-0.901803	-0.969475	YES		-1.39724	-1.82273	-0.976219	-1.39947				ITGB3	ITGB3	ITGB3	ITGB3
92565	ENSG00000203780	FANK1	fibronectin type III and ankyrin repeat domains 1	1.40529	1.03517e-14
139065	ENSG00000179542	SLITRK4	SLIT and NTRK like family member 4	-2.24039	1.04957e-14
7453	ENSG00000140105	WARS	tryptophanyl-tRNA synthetase	-0.566195	1.16515e-14	-0.320901	-0.423094	-0.371997		-0.256938								WARS
6641	ENSG00000172164	SNTB1	syntrophin beta 1	-1.13826	1.30103e-14													SNTB1
51363	ENSG00000182022	CHST15	carbohydrate sulfotransferase 15	-2.27421	1.43014e-14
22822	ENSG00000139289	PHLDA1	pleckstrin homology like domain family A member 1	-0.779599	1.50957e-14
7422	ENSG00000112715	VEGFA	vascular endothelial growth factor A	-0.701077	1.57361e-14										VEGFA	Matrisome-associated	Secreted Factors
10690	ENSG00000172461	FUT9	fucosyltransferase 9	-2.21092	1.57501e-14
4045	ENSG00000185565	LSAMP	limbic system associated membrane protein	-1.24533	1.70532e-14
91584	ENSG00000221866	PLXNA4	plexin A4	1.66438	1.78789e-14										PLXNA4	Matrisome-associated	ECM-affiliated Proteins
55959	ENSG00000196562	SULF2	sulfatase 2	1.84532	1.84496e-14										SULF2	Matrisome-associated	ECM Regulators
11164	ENSG00000165609	NUDT5	nudix hydrolase 5	0.657832	1.94349e-14		0.344465	0.344465		0.331312								NUDT5
81691	ENSG00000005189	REXO5	RNA exonuclease 5	0.899752	1.95283e-14
219736	ENSG00000165730	STOX1	storkhead box 1	1.43096	2.1236e-14
83540	ENSG00000143228	NUF2	NDC80 kinetochore complex component NUF2	0.652178	2.19828e-14
84858	ENSG00000165655	ZNF503	zinc finger protein 503	0.934515	2.39029e-14
148252	ENSG00000176490	DIRAS1	DIRAS family GTPase 1	1.11789	2.59219e-14
57662	ENSG00000076826	CAMSAP3	calmodulin regulated spectrin associated protein family member 3	-1.52644	2.74066e-14
375790	ENSG00000188157	AGRN	agrin	-0.77276	3.06348e-14		0.0683321	0.0683321		-0.0875075	0.747732	-2.79044	-1.48245	-2.13645	AGRN	Core matrisome	ECM Glycoproteins
23705	ENSG00000182985	CADM1	cell adhesion molecule 1	0.563861	3.12906e-14	1.26333	1.66054	1.46194	YES	0.513834
25890	ENSG00000154175	ABI3BP	ABI family member 3 binding protein	1.44074	3.27264e-14					2.66007	1.0251				ABI3BP	Core matrisome	ECM Glycoproteins
151636	ENSG00000163840	DTX3L	deltex E3 ubiquitin ligase 3L	-1.06507	3.27264e-14					-1.7591								DTX3L
84570	ENSG00000188517	COL25A1	collagen type XXV alpha 1 chain	-2.23131	3.27641e-14										COL25A1	Core matrisome	Collagens
347902	ENSG00000139211	AMIGO2	adhesion molecule with Ig like domain 2	-0.778025	3.34079e-14	0.401521		0.401521		-1.52529
5947	ENSG00000114115	RBP1	retinol binding protein 1	-1.43011	3.58009e-14					-1.2749								RBP1
7518	ENSG00000152422	XRCC4	X-ray repair cross complementing 4	0.795991	3.60373e-14
9353	ENSG00000145147	SLIT2	slit guidance ligand 2	-1.40535	3.95942e-14										SLIT2	Core matrisome	ECM Glycoproteins	SLIT2
9636	ENSG00000187608	ISG15	ISG15 ubiquitin-like modifier	-1.13132	4.09013e-14					-1.54788
5745	ENSG00000160801	PTH1R	parathyroid hormone 1 receptor	1.32724	4.14935e-14
29015	ENSG00000134802	SLC43A3	solute carrier family 43 member 3	-0.755253	4.24735e-14
207	ENSG00000142208	AKT1	AKT serine/threonine kinase 1	-0.522942	4.65362e-14	-0.501157	-0.620117	-0.560637	YES
8036	ENSG00000108061	SHOC2	SHOC2, leucine rich repeat scaffold protein	0.663407	4.66502e-14					0.775172
2247	ENSG00000138685	FGF2	fibroblast growth factor 2	-0.656376	5.13101e-14	0.200253	0.465918	0.333086			-0.182149				FGF2	Matrisome-associated	Secreted Factors	FGF2
8974	ENSG00000072682	P4HA2	prolyl 4-hydroxylase subunit alpha 2	-0.700226	5.42306e-14	-0.115941	-0.0385767	-0.077259		-0.1918					P4HA2	Matrisome-associated	ECM Regulators	P4HA2
55680	ENSG00000204130	RUFY2	RUN and FYVE domain containing 2	0.725013	5.58042e-14
79228	ENSG00000131652	THOC6	THO complex 6	0.941011	5.63828e-14													THOC6
337876	ENSG00000198108	CHSY3	chondroitin sulfate synthase 3	-1.85259	5.63828e-14
4601	ENSG00000119950	MXI1	MAX interactor 1, dimerization protein	0.841579	5.78202e-14
347735	ENSG00000168528	SERINC2	serine incorporator 2	-0.776884	5.89943e-14
55930	ENSG00000128833	MYO5C	myosin VC	-0.872046	6.03646e-14
10021	ENSG00000138622	HCN4	hyperpolarization activated cyclic nucleotide gated potassium channel 4	1.58072	6.15769e-14
8795	ENSG00000120889	TNFRSF10B	TNF receptor superfamily member 10b	-0.662497	8.41144e-14
9123	ENSG00000141526	SLC16A3	solute carrier family 16 member 3	-0.626827	9.34044e-14		-0.866235	-0.866235
7849	ENSG00000125618	PAX8	paired box 8	-0.621526	9.59764e-14
9780	ENSG00000103335	PIEZO1	piezo type mechanosensitive ion channel component 1	-0.839118	9.77867e-14
80020	ENSG00000100350	FOXRED2	FAD dependent oxidoreductase domain containing 2	-1.6712	9.78323e-14
2004	ENSG00000111145	ELK3	ELK3, ETS transcription factor	-0.583137	9.98991e-14
2746	ENSG00000148672	GLUD1	glutamate dehydrogenase 1	0.494859	1.08023e-13	-0.0452677	0.00569545	-0.0197861		1.33732								GLUD1
10734	ENSG00000066923	STAG3	stromal antigen 3	-1.47943	1.13601e-13
2123	ENSG00000126860	EVI2A	ecotropic viral integration site 2A	1.6815	1.13621e-13
5264	ENSG00000107537	PHYH	phytanoyl-CoA 2-hydroxylase	0.95317	1.14931e-13
83882	ENSG00000182612	TSPAN10	tetraspanin 10	1.13896	1.14931e-13	0.428893	0.718782	0.573838
7582	ENSG00000196693	ZNF33B	zinc finger protein 33B	0.781843	1.24329e-13
90161	ENSG00000171004	HS6ST2	heparan sulfate 6-O-sulfotransferase 2	2.0248	1.33717e-13
80195	ENSG00000133678	TMEM254	transmembrane protein 254	0.708941	1.4541e-13
11130	ENSG00000122952	ZWINT	ZW10 interacting kinetochore protein	0.641835	1.46295e-13													ZWINT
3976	ENSG00000128342	LIF	LIF, interleukin 6 family cytokine	-0.730601	1.4877e-13										LIF	Matrisome-associated	Secreted Factors
1847	ENSG00000138166	DUSP5	dual specificity phosphatase 5	-0.806315	1.6485e-13
1879	ENSG00000164330	EBF1	EBF transcription factor 1	1.99301	1.6485e-13
54780	ENSG00000107672	NSMCE4A	NSE4 homolog A, SMC5-SMC6 complex component	0.653762	1.82525e-13
4634	ENSG00000160808	MYL3	myosin light chain 3	1.5475	1.84183e-13
5649	ENSG00000189056	RELN	reelin	-2.181	1.87777e-13										RELN	Core matrisome	ECM Glycoproteins
85441	ENSG00000130589	HELZ2	helicase with zinc finger 2	-0.923258	1.87777e-13													HELZ2
10395	ENSG00000164741	DLC1	DLC1 Rho GTPase activating protein	-0.740001	1.90687e-13
8837	ENSG00000003402	CFLAR	CASP8 and FADD like apoptosis regulator	-0.740842	1.93633e-13
5924	ENSG00000113319	RASGRF2	Ras protein specific guanine nucleotide releasing factor 2	-1.02932	2.00937e-13
143279	ENSG00000165338	HECTD2	HECT domain E3 ubiquitin protein ligase 2	0.720094	2.03471e-13
375449	ENSG00000069020	MAST4	microtubule associated serine/threonine kinase family member 4	-1.49809	2.36746e-13
1917	ENSG00000101210	EEF1A2	eukaryotic translation elongation factor 1 alpha 2	0.861383	2.52502e-13		-0.241596	-0.241596
10970	ENSG00000136026	CKAP4	cytoskeleton associated protein 4	-0.625395	2.64147e-13	-0.256959	-0.279887	-0.268423			-1.13693	-0.545178	-0.763293	-0.654235				CKAP4
1307	ENSG00000084636	COL16A1	collagen type XVI alpha 1 chain	-0.81962	2.70108e-13						-2.09779				COL16A1	Core matrisome	Collagens	COL16A1
8111	ENSG00000119714	GPR68	G protein-coupled receptor 68	-1.52443	2.73123e-13
57595	ENSG00000067840	PDZD4	PDZ domain containing 4	1.41879	2.82149e-13
56479	ENSG00000185760	KCNQ5	potassium voltage-gated channel subfamily Q member 5	-1.78096	2.89537e-13
10019	ENSG00000111252	SH2B3	SH2B adaptor protein 3	-0.817389	2.93991e-13
55337	ENSG00000130813	C19orf66	chromosome 19 open reading frame 66	-0.87976	3.31111e-13	-0.689706		-0.689706
124540	ENSG00000153944	MSI2	musashi RNA binding protein 2	-0.865262	3.35282e-13													MSI2
150465	ENSG00000114999	TTL	tubulin tyrosine ligase	-0.544046	3.53005e-13
11245	ENSG00000166073	GPR176	G protein-coupled receptor 176	-0.61455	3.53594e-13
54033	ENSG00000185272	RBM11	RNA binding motif protein 11	-2.13315	3.58252e-13
219285	ENSG00000177409	SAMD9L	sterile alpha motif domain containing 9 like	-1.3433	3.80572e-13
10501	ENSG00000167680	SEMA6B	semaphorin 6B	1.29772	3.96556e-13										SEMA6B	Matrisome-associated	ECM-affiliated Proteins
5532	ENSG00000107758	PPP3CB	protein phosphatase 3 catalytic subunit beta	0.55219	4.1341e-13
101	ENSG00000151651	ADAM8	ADAM metallopeptidase domain 8	-1.69127	4.27379e-13										ADAM8	Matrisome-associated	ECM Regulators
2192	ENSG00000077942	FBLN1	fibulin 1	-2.10146	4.41347e-13										FBLN1	Core matrisome	ECM Glycoproteins	FBLN1
1907	ENSG00000127129	EDN2	endothelin 2	1.6274	4.43992e-13
57333	ENSG00000142552	RCN3	reticulocalbin 3	-1.86315	4.51562e-13
3832	ENSG00000138160	KIF11	kinesin family member 11	0.688552	4.75192e-13	0.403922	0.452274	0.428098		0.246104		1.42919	0.84149	1.13534
57149	ENSG00000102897	LYRM1	LYR motif containing 1	0.659757	4.75435e-13
8743	ENSG00000121858	TNFSF10	TNF superfamily member 10	-0.915856	5.04561e-13						-0.806356				TNFSF10	Matrisome-associated	Secreted Factors
100129482	ENSG00000234420	ZNF37BP	zinc finger protein 37B, pseudogene	0.779008	5.454e-13
7390	ENSG00000188690	UROS	uroporphyrinogen III synthase	0.546692	5.58618e-13
9246	ENSG00000156587	UBE2L6	ubiquitin conjugating enzyme E2 L6	-1.11609	5.64912e-13
3988	ENSG00000107798	LIPA	lipase A, lysosomal acid type	0.755948	5.80616e-13		1.95282	1.95282		1.42362
2314	ENSG00000177731	FLII	FLII, actin remodeling protein	-0.527254	6.359e-13	-0.494698	-0.344147	-0.419423		-0.501525		-0.0278618	-0.355719	-0.19179				FLII
51182	ENSG00000187522	HSPA14	heat shock protein family A (Hsp70) member 14	0.555558	6.67877e-13													HSPA14
89891	ENSG00000119333	WDR34	WD repeat domain 34	0.520712	7.23081e-13
5708	ENSG00000175166	PSMD2	proteasome 26S subunit, non-ATPase 2	-0.493353	7.32222e-13	-0.428372	-0.361544	-0.394958		-0.0935244		0.34628	0.117695	0.231987				PSMD2
642852	ENSG00000223768	LOC642852	uncharacterized LOC642852	-0.778012	7.67187e-13
1909	ENSG00000151617	EDNRA	endothelin receptor type A	-1.19814	7.7872e-13
169714	ENSG00000165661	QSOX2	quiescin sulfhydryl oxidase 2	-0.711375	8.75046e-13					-0.702549
51361	ENSG00000134709	HOOK1	hook microtubule tethering protein 1	-0.813751	9.63608e-13
8559	ENSG00000165630	PRPF18	pre-mRNA processing factor 18	0.670033	9.89855e-13
960	ENSG00000026508	CD44	CD44 molecule (Indian blood group)	-0.555215	1.04262e-12	-1.44914	-1.48625	-1.46769	YES	0.0909846	-0.0693657	-0.798839	-0.524708	-0.661773				CD44
28231	ENSG00000101187	SLCO4A1	solute carrier organic anion transporter family member 4A1	-0.901286	1.04262e-12
25937	ENSG00000018408	WWTR1	WW domain containing transcription regulator 1	-0.634856	1.19612e-12
317662	ENSG00000138286	FAM149B1	family with sequence similarity 149 member B1	0.812517	1.2423e-12
9919	ENSG00000148396	SEC16A	SEC16 homolog A, endoplasmic reticulum export factor	-0.779638	1.32878e-12	-0.589941	-0.356257	-0.473099
5937	ENSG00000153250	RBMS1	RNA binding motif single stranded interacting protein 1	-0.73646	1.37539e-12	0.42094		0.42094
56647	ENSG00000107949	BCCIP	BRCA2 and CDKN1A interacting protein	0.711759	1.44476e-12		-0.116365	-0.116365		0.0881284
10687	ENSG00000240694	PNMA2	PNMA family member 2	-2.10087	1.56229e-12
84959	ENSG00000154127	UBASH3B	ubiquitin associated and SH3 domain containing B	-0.913658	1.57334e-12	0.6277	0.59018	0.60894	YES
101928176	ENSG00000249306	LINC01411	long intergenic non-protein coding RNA 1411	2.08263	1.65783e-12
57161	ENSG00000139946	PELI2	pellino E3 ubiquitin protein ligase family member 2	-1.69506	1.68664e-12
51473	ENSG00000146038	DCDC2	doublecortin domain containing 2	-0.685578	1.71277e-12					-1.0318
81031	ENSG00000197496	SLC2A10	solute carrier family 2 member 10	-2.09563	1.75695e-12
22854	ENSG00000162631	NTNG1	netrin G1	-0.835342	1.8488e-12					-0.894444					NTNG1	Core matrisome	ECM Glycoproteins
283316	ENSG00000177675	CD163L1	CD163 molecule like 1	-1.60559	1.96104e-12
57484	ENSG00000170153	RNF150	ring finger protein 150	-1.91092	2.03402e-12
203447	ENSG00000123572	NRK	Nik related kinase	-0.876365	2.03402e-12	-1.15795	-1.74002	-1.44898	YES
23065	ENSG00000127463	EMC1	ER membrane protein complex subunit 1	-0.932405	2.05248e-12		-0.218471	-0.218471
3914	ENSG00000196878	LAMB3	laminin subunit beta 3	-0.705109	2.23645e-12						0.113901				LAMB3	Core matrisome	ECM Glycoproteins
283638	ENSG00000099814	CEP170B	centrosomal protein 170B	-0.606147	2.23645e-12	0.198243		0.198243
4925	ENSG00000070081	NUCB2	nucleobindin 2	0.593141	2.37385e-12	0.441271	0.378157	0.409714		0.952836
84263	ENSG00000119471	HSDL2	hydroxysteroid dehydrogenase like 2	0.604643	2.48903e-12	0.473215	0.514656	0.493936		1.22825
6578	ENSG00000174640	SLCO2A1	solute carrier organic anion transporter family member 2A1	-1.77359	2.52124e-12
55280	ENSG00000095485	CWF19L1	CWF19 like cell cycle control factor 1	0.580398	2.61578e-12					0.370694
23474	ENSG00000105755	ETHE1	ETHE1, persulfide dioxygenase	0.727877	2.62249e-12	0.630219	1.29329	0.961754	YES	0.478461
1284	ENSG00000134871	COL4A2	collagen type IV alpha 2 chain	-0.810156	2.62728e-12	0.480369	0.344923	0.412646		-0.357959	0.0179731	-3.809	-1.89373	-2.85137	COL4A2	Core matrisome	Collagens	COL4A2
11343	ENSG00000074416	MGLL	monoglyceride lipase	-0.620132	2.65733e-12	-0.209995	-0.376957	-0.293476
284217	ENSG00000101680	LAMA1	laminin subunit alpha 1	-1.65151	2.81185e-12										LAMA1	Core matrisome	ECM Glycoproteins
3688	ENSG00000150093	ITGB1	integrin subunit beta 1	0.631646	2.90063e-12	0.0143553	0.0958358	0.0550955		-0.00146464	-0.610749	-1.08468	0.0608775	-0.5119				ITGB1	ITGB1	ITGB1	ITGB1
51390	ENSG00000146416	AIG1	androgen induced 1	0.549465	3.15882e-12
8887	ENSG00000106052	TAX1BP1	Tax1 binding protein 1	0.464326	3.43057e-12
6452	ENSG00000087266	SH3BP2	SH3 domain binding protein 2	-0.764906	3.62518e-12
8519	ENSG00000185885	IFITM1	interferon induced transmembrane protein 1	-1.58866	3.74575e-12
6588	ENSG00000170290	SLN	sarcolipin	1.14411	3.8266e-12
7424	ENSG00000150630	VEGFC	vascular endothelial growth factor C	-0.730107	4.04946e-12					-0.732992					VEGFC	Matrisome-associated	Secreted Factors
26996	ENSG00000173890	GPR160	G protein-coupled receptor 160	0.973607	4.52995e-12
84875	ENSG00000178685	PARP10	poly(ADP-ribose) polymerase family member 10	-0.886592	5.67281e-12
2034	ENSG00000116016	EPAS1	endothelial PAS domain protein 1	-0.793058	6.16727e-12
8847	ENSG00000231607	DLEU2	deleted in lymphocytic leukemia 2	0.988314	6.27274e-12
11200	ENSG00000183765	CHEK2	checkpoint kinase 2	0.918405	6.78987e-12
4291	ENSG00000178053	MLF1	myeloid leukemia factor 1	0.593678	6.84604e-12
55038	ENSG00000170779	CDCA4	cell division cycle associated 4	-0.659408	7.06423e-12
2668	ENSG00000168621	GDNF	glial cell derived neurotrophic factor	0.634013	7.34366e-12										GDNF	Matrisome-associated	Secreted Factors
56606	ENSG00000109667	SLC2A9	solute carrier family 2 member 9	-1.072	7.34366e-12
132430	ENSG00000254535	PABPC4L	poly(A) binding protein cytoplasmic 4 like	-1.33769	7.34366e-12
51185	ENSG00000113851	CRBN	cereblon	0.607443	7.64868e-12
219402	ENSG00000122033	MTIF3	mitochondrial translational initiation factor 3	0.875833	7.95088e-12
55051	ENSG00000119720	NRDE2	NRDE-2, necessary for RNA interference, domain containing	-0.780237	8.00286e-12
23277	ENSG00000132361	CLUH	clustered mitochondria homolog	-0.462582	8.02693e-12	-1.13521	-1.32302	-1.22911										CLUH
84947	ENSG00000122335	SERAC1	serine active site containing 1	0.791899	8.18434e-12
114088	ENSG00000100505	TRIM9	tripartite motif containing 9	1.30816	8.41262e-12
55906	ENSG00000126970	ZC4H2	zinc finger C4H2-type containing	-1.28284	8.8607e-12
54863	ENSG00000198113	TOR4A	torsin family 4 member A	-0.872622	9.71222e-12		-0.408821	-0.408821
10935	ENSG00000165672	PRDX3	peroxiredoxin 3	0.694762	9.84592e-12	1.22922	1.06739	1.14831	YES	0.631403		-0.247198	-0.777838	-0.512518				PRDX3
27147	ENSG00000146966	DENND2A	DENN domain containing 2A	0.711399	1.02297e-11													DENND2A
55255	ENSG00000164253	WDR41	WD repeat domain 41	0.567868	1.06759e-11
54537	ENSG00000122376	SHLD2	shieldin complex subunit 2	0.6527	1.06779e-11
10628	ENSG00000265972	TXNIP	thioredoxin interacting protein	0.637799	1.09254e-11
9126	ENSG00000108055	SMC3	structural maintenance of chromosomes 3	0.600474	1.13116e-11	0.0694272	0.128409	0.0989179		0.697196		1.0998	0.671384	0.885594				SMC3
84620	ENSG00000144057	ST6GAL2	ST6 beta-galactoside alpha-2,6-sialyltransferase 2	-1.03181	1.13116e-11
64175	ENSG00000117385	P3H1	prolyl 3-hydroxylase 1	-0.486355	1.13593e-11					-0.355666
134218	ENSG00000168724	DNAJC21	DnaJ heat shock protein family (Hsp40) member C21	0.57838	1.17345e-11
100130417	ENSG00000223764	LINC02593	long intergenic non-protein coding RNA 2593	1.22579	1.24738e-11
1291	ENSG00000142156	COL6A1	collagen type VI alpha 1 chain	-0.677227	1.27338e-11					0.378116					COL6A1	Core matrisome	Collagens	COL6A1
80149	ENSG00000163874	ZC3H12A	zinc finger CCCH-type containing 12A	-0.853435	1.3025e-11
5728	ENSG00000171862	PTEN	phosphatase and tensin homolog	0.608088	1.30298e-11
9517	ENSG00000100596	SPTLC2	serine palmitoyltransferase long chain base subunit 2	-0.607826	1.3194e-11		-0.0773797	-0.0773797
83641	ENSG00000065809	FAM107B	family with sequence similarity 107 member B	0.688983	1.33402e-11	0.168642	0.185753	0.177198
3416	ENSG00000119912	IDE	insulin degrading enzyme	0.601792	1.40483e-11		0.144951	0.144951		0.0455316
23022	ENSG00000129116	PALLD	palladin, cytoskeletal associated protein	-0.648394	1.47613e-11	-0.532428	-0.480989	-0.506709		-1.15468		-0.782325	-0.218766	-0.500545				PALLD	PALLD	PALLD	PALLD
26959	ENSG00000105856	HBP1	HMG-box transcription factor 1	0.650101	1.51096e-11
54898	ENSG00000197977	ELOVL2	ELOVL fatty acid elongase 2	0.66902	1.53748e-11
6548	ENSG00000090020	SLC9A1	solute carrier family 9 member A1	-0.951586	1.5716e-11
23670	ENSG00000135048	CEMIP2	cell migration inducing hyaluronidase 2	-0.686695	1.67774e-11
5743	ENSG00000073756	PTGS2	prostaglandin-endoperoxide synthase 2	-1.51158	1.69071e-11
10006	ENSG00000136754	ABI1	abl interactor 1	0.475869	1.71211e-11	0.181166	0.0346183	0.107892										ABI1		ABI1	ABI1
91156	ENSG00000163395	IGFN1	immunoglobulin-like and fibronectin type III domain containing 1	0.923658	1.74984e-11
51665	ENSG00000065802	ASB1	ankyrin repeat and SOCS box containing 1	-0.496955	2.00021e-11
81788	ENSG00000163545	NUAK2	NUAK family kinase 2	-1.08048	2.19481e-11
1268	ENSG00000118432	CNR1	cannabinoid receptor 1	1.88935	2.32003e-11
55920	ENSG00000179051	RCC2	regulator of chromosome condensation 2	-0.81892	2.3373e-11	0.103665	0.178224	0.140945		-0.0555791								RCC2
339804	ENSG00000237651	C2orf74	chromosome 2 open reading frame 74	0.85162	2.43234e-11
57575	ENSG00000138650	PCDH10	protocadherin 10	0.877355	2.44884e-11
1390	ENSG00000095794	CREM	cAMP responsive element modulator	0.787236	2.56178e-11
135398	ENSG00000197261	C6orf141	chromosome 6 open reading frame 141	-1.68082	2.56178e-11
90550	ENSG00000156026	MCU	mitochondrial calcium uniporter	0.733376	2.65019e-11
27300	ENSG00000198131	ZNF544	zinc finger protein 544	-0.794909	2.72536e-11
85439	ENSG00000140022	STON2	stonin 2	1.90083	3.26788e-11													STON2
7368	ENSG00000174607	UGT8	UDP glycosyltransferase 8	-0.868848	3.31389e-11
6574	ENSG00000144136	SLC20A1	solute carrier family 20 member 1	-0.731404	3.83765e-11
83690	ENSG00000121005	CRISPLD1	cysteine rich secretory protein LCCL domain containing 1	-0.774778	3.84825e-11										CRISPLD1	Core matrisome	ECM Glycoproteins
26128	ENSG00000198954	KIF1BP	KIF1 binding protein	0.463444	4.02765e-11					0.524329
2971	ENSG00000122034	GTF3A	general transcription factor IIIA	0.587527	4.35617e-11
22929	ENSG00000086475	SEPHS1	selenophosphate synthetase 1	0.574025	4.79986e-11	0.431249	0.534412	0.48283		0.673847
55700	ENSG00000116871	MAP7D1	MAP7 domain containing 1	-0.617642	4.97102e-11	-0.682001	-0.582749	-0.632375	YES									MAP7D1
4240	ENSG00000140545	MFGE8	milk fat globule-EGF factor 8 protein	-0.446248	5.00301e-11		1.82956	1.82956		1.26503	0.335461	-0.546561	0.263996	-0.141283	MFGE8	Core matrisome	ECM Glycoproteins	MFGE8
7168	ENSG00000140416	TPM1	tropomyosin 1	-0.482269	5.19281e-11					-0.31228	-1.14041	-0.090447	-0.245232	-0.16784				TPM1
7798	ENSG00000169641	LUZP1	leucine zipper protein 1	-0.8229	5.71343e-11	-0.501872	-0.275603	-0.388737		-0.563082		-0.929564	-0.993666	-0.961615				LUZP1
55024	ENSG00000153064	BANK1	B cell scaffold protein with ankyrin repeats 1	-1.04114	5.71343e-11
23657	ENSG00000151012	SLC7A11	solute carrier family 7 member 11	-0.936307	6.046e-11
5265	ENSG00000197249	SERPINA1	serpin family A member 1	-1.24163	6.14697e-11					-2.40173					SERPINA1	Matrisome-associated	ECM Regulators
9249	ENSG00000162496	DHRS3	dehydrogenase/reductase 3	1.23583	6.35585e-11
91754	ENSG00000119638	NEK9	NIMA related kinase 9	-0.562762	6.39707e-11					-1.09193
26958	ENSG00000158623	COPG2	coatomer protein complex subunit gamma 2	0.523944	6.43145e-11	0.174151	0.153061	0.163606		0.305648
7058	ENSG00000186340	THBS2	thrombospondin 2	-1.90135	6.47812e-11					-0.974368					THBS2	Core matrisome	ECM Glycoproteins	THBS2
55388	ENSG00000065328	MCM10	minichromosome maintenance 10 replication initiation factor	0.658033	6.63485e-11
10724	ENSG00000198408	OGA	O-GlcNAcase	0.516426	6.669e-11					0.782423
126917	ENSG00000169991	IFFO2	intermediate filament family orphan 2	-0.552431	7.07583e-11
9127	ENSG00000099957	P2RX6	purinergic receptor P2X 6	1.72379	7.15765e-11
114569	ENSG00000147676	MAL2	mal, T cell differentiation protein 2 (gene/pseudogene)	-0.902119	7.15765e-11
83862	ENSG00000189077	TMEM120A	transmembrane protein 120A	0.82113	7.3131e-11
145173	ENSG00000187676	B3GLCT	beta 3-glucosyltransferase	0.562858	8.11712e-11
7321	ENSG00000072401	UBE2D1	ubiquitin conjugating enzyme E2 D1	0.615686	8.1736e-11
3437	ENSG00000119917	IFIT3	interferon induced protein with tetratricopeptide repeats 3	-0.733777	8.29983e-11
10635	ENSG00000111247	RAD51AP1	RAD51 associated protein 1	0.521364	8.93585e-11
54518	ENSG00000077420	APBB1IP	amyloid beta precursor protein binding family B member 1 interacting protein	0.571055	8.93585e-11	1.48512		1.48512
6319	ENSG00000099194	SCD	stearoyl-CoA desaturase	-0.778863	8.98901e-11
3624	ENSG00000122641	INHBA	inhibin subunit beta A	-0.891933	8.99523e-11					-1.16359					INHBA	Matrisome-associated	Secreted Factors
142940	ENSG00000165832	TRUB1	TruB pseudouridine synthase family member 1	0.535263	9.08229e-11
23286	ENSG00000113645	WWC1	WW and C2 domain containing 1	-0.676458	9.17316e-11
7145	ENSG00000079308	TNS1	tensin 1	-1.02976	9.20405e-11	-1.79221	-0.512884	-1.15255	YES			-1.15075	-0.707501	-0.929128				TNS1		TNS1	TNS1
57118	ENSG00000183049	CAMK1D	calcium/calmodulin dependent protein kinase ID	0.896142	9.74521e-11
7763	ENSG00000107372	ZFAND5	zinc finger AN1-type containing 5	-0.421447	1.00525e-10
60559	ENSG00000129128	SPCS3	signal peptidase complex subunit 3	-0.710241	1.01152e-10	0.107152	0.297537	0.202345
3604	ENSG00000049249	TNFRSF9	TNF receptor superfamily member 9	-0.883836	1.04317e-10
10923	ENSG00000113387	SUB1	SUB1 homolog, transcriptional regulator	0.656735	1.06121e-10	0.596649	0.873054	0.734851	YES	0.754099								SUB1
84545	ENSG00000055950	MRPL43	mitochondrial ribosomal protein L43	0.605964	1.07801e-10	-0.0199454	-0.345737	-0.182841
85395	ENSG00000160256	FAM207A	family with sequence similarity 207 member A	-0.750749	1.14813e-10	-0.0105122		-0.0105122										FAM207A
677800	ENSG00000212464	SNORA12	small nucleolar RNA, H/ACA box 12	1.78186	1.18658e-10
54913	ENSG00000178718	RPP25	ribonuclease P and MRP subunit p25	-1.62307	1.1965e-10
1434	ENSG00000124207	CSE1L	chromosome segregation 1 like	0.5892	1.22183e-10	0.0201999	0.0942178	0.0572089		0.191737	-0.324541	1.14602	0.330788	0.738404				CSE1L
55502	ENSG00000144485	HES6	hes family bHLH transcription factor 6	0.886032	1.25061e-10
64423	ENSG00000203485	INF2	inverted formin, FH2 and WH2 domain containing	-0.743708	1.31868e-10	-0.64758	-0.149259	-0.39842
9870	ENSG00000119682	AREL1	apoptosis resistant E3 ubiquitin protein ligase 1	-0.641262	1.32176e-10
9858	ENSG00000196422	PPP1R26	protein phosphatase 1 regulatory subunit 26	-0.646734	1.32543e-10
51642	ENSG00000175581	MRPL48	mitochondrial ribosomal protein L48	0.765471	1.3572e-10		0.162315	0.162315
51136	ENSG00000189050	RNFT1	ring finger protein, transmembrane 1	0.649208	1.42968e-10
2041	ENSG00000146904	EPHA1	EPH receptor A1	-1.86436	1.46706e-10
444	ENSG00000198363	ASPH	aspartate beta-hydroxylase	-0.566822	1.5019e-10	-0.684063	-0.690551	-0.687307	YES
23034	ENSG00000020577	SAMD4A	sterile alpha motif domain containing 4A	-0.679282	1.50933e-10
6712	ENSG00000173898	SPTBN2	spectrin beta, non-erythrocytic 2	-0.826914	1.5137e-10		-0.0499095	-0.0499095				-0.752577	-1.17478	-0.963681				SPTBN2
11240	ENSG00000117115	PADI2	peptidyl arginine deiminase 2	-1.4917	1.58676e-10
51167	ENSG00000065615	CYB5R4	cytochrome b5 reductase 4	0.640969	1.62579e-10
8906	ENSG00000213983	AP1G2	adaptor related protein complex 1 subunit gamma 2	-0.561224	1.64615e-10					0.680348
64105	ENSG00000123219	CENPK	centromere protein K	0.579682	1.69492e-10
8334	ENSG00000180573	HIST1H2AC	histone cluster 1 H2A family member c	1.15789	1.79432e-10
7511	ENSG00000108039	XPNPEP1	X-prolyl aminopeptidase 1	0.617226	1.79675e-10	0.549817	0.744608	0.647213	YES	0.449052
3202	ENSG00000106004	HOXA5	homeobox A5	0.625656	1.8016e-10
115908	ENSG00000164932	CTHRC1	collagen triple helix repeat containing 1	-1.57652	1.81332e-10										CTHRC1	Core matrisome	ECM Glycoproteins	CTHRC1
79083	ENSG00000115648	MLPH	melanophilin	-0.79032	1.89529e-10
54764	ENSG00000019995	ZRANB1	zinc finger RANBP2-type containing 1	0.451152	1.99827e-10
25932	ENSG00000169504	CLIC4	chloride intracellular channel 4	-0.477779	2.09404e-10	-0.0657628	0.0818275	0.00803235		-0.587799								CLIC4
11344	ENSG00000247596	TWF2	twinfilin actin binding protein 2	-0.588644	2.12779e-10	0.0655723	0.0529548	0.0592636		-0.450283
1437	ENSG00000164400	CSF2	colony stimulating factor 2	-1.77356	2.13783e-10										CSF2	Matrisome-associated	Secreted Factors
8505	ENSG00000227345	PARG	poly(ADP-ribose) glycohydrolase	0.632166	2.17342e-10													PARG
4883	ENSG00000113389	NPR3	natriuretic peptide receptor 3	0.689734	2.24202e-10
85352	ENSG00000138944	SHISAL1	shisa like 1	1.67973	2.27566e-10
9732	ENSG00000128512	DOCK4	dedicator of cytokinesis 4	-1.11695	2.35409e-10
22978	ENSG00000076685	NT5C2	5'-nucleotidase, cytosolic II	0.590271	2.35409e-10		0.430451	0.430451		0.683238								NT5C2
1647	ENSG00000116717	GADD45A	growth arrest and DNA damage inducible alpha	-0.651106	2.41267e-10
114800	ENSG00000055813	CCDC85A	coiled-coil domain containing 85A	1.43103	2.48684e-10
54972	ENSG00000006118	TMEM132A	transmembrane protein 132A	-0.548476	2.56606e-10
54838	ENSG00000166272	WBP1L	WW domain binding protein 1 like	0.574696	2.63554e-10
4751	ENSG00000117650	NEK2	NIMA related kinase 2	0.53119	2.68507e-10
64789	ENSG00000164002	EXO5	exonuclease 5	-1.19015	2.77595e-10
4015	ENSG00000113083	LOX	lysyl oxidase	-1.59611	2.98868e-10					-0.920586					LOX	Matrisome-associated	ECM Regulators	LOX
83666	ENSG00000138496	PARP9	poly(ADP-ribose) polymerase family member 9	-0.829549	3.26388e-10													PARP9
122402	ENSG00000156414	TDRD9	tudor domain containing 9	-0.749412	3.48442e-10
1147	ENSG00000213341	CHUK	conserved helix-loop-helix ubiquitous kinase	0.545571	3.52786e-10
2042	ENSG00000044524	EPHA3	EPH receptor A3	1.27342	3.76688e-10													EPHA3
57381	ENSG00000126785	RHOJ	ras homolog family member J	-1.86824	3.81418e-10
9314	ENSG00000136826	KLF4	Kruppel like factor 4	-1.75127	3.84056e-10
100131755	ENSG00000196440	ARMCX4	armadillo repeat containing X-linked 4	-1.49094	3.87085e-10
55671	ENSG00000100796	PPP4R3A	protein phosphatase 4 regulatory subunit 3A	-0.512286	3.8866e-10					-0.549888
5806	ENSG00000163661	PTX3	pentraxin 3	-1.24856	3.91516e-10					-1.27811	-1.20146
5396	ENSG00000116132	PRRX1	paired related homeobox 1	-1.60083	4.21764e-10													PRRX1
382	ENSG00000165527	ARF6	ADP ribosylation factor 6	-0.662276	4.30685e-10		-0.37729	-0.37729			-0.341117							ARF6
79772	ENSG00000175471	MCTP1	multiple C2 and transmembrane domain containing 1	-0.824987	4.34033e-10
7187	ENSG00000131323	TRAF3	TNF receptor associated factor 3	-0.497747	4.37219e-10
79647	ENSG00000174574	AKIRIN1	akirin 1	-0.470065	4.37219e-10
100129842	ENSG00000237440	ZNF737	zinc finger protein 737	1.87255	4.43064e-10
51109	ENSG00000072042	RDH11	retinol dehydrogenase 11	-0.548771	4.47964e-10		-0.744333	-0.744333
29103	ENSG00000120675	DNAJC15	DnaJ heat shock protein family (Hsp40) member C15	0.734757	4.60427e-10
272	ENSG00000133805	AMPD3	adenosine monophosphate deaminase 3	-0.94934	4.61808e-10		-2.49234	-2.49234
22859	ENSG00000072071	ADGRL1	adhesion G protein-coupled receptor L1	0.986247	4.67044e-10
22882	ENSG00000178764	ZHX2	zinc fingers and homeoboxes 2	-0.914103	4.68919e-10	-0.586623		-0.586623
7083	ENSG00000167900	TK1	thymidine kinase 1	0.470167	4.8654e-10	-0.0505472	-0.031254	-0.0409006		-0.609395								TK1
1303	ENSG00000111799	COL12A1	collagen type XII alpha 1 chain	-0.943968	4.87133e-10					-0.730905	-1.2507				COL12A1	Core matrisome	Collagens	COL12A1
199857	ENSG00000172339	ALG14	ALG14, UDP-N-acetylglucosaminyltransferase subunit	0.765777	5.53479e-10
64129	ENSG00000142910	TINAGL1	tubulointerstitial nephritis antigen like 1	-0.611854	5.69645e-10					0.559159	-0.771157				TINAGL1	Core matrisome	ECM Glycoproteins	TINAGL1
72	ENSG00000163017	ACTG2	actin, gamma 2, smooth muscle, enteric	-1.84166	5.81608e-10
2070	ENSG00000112319	EYA4	EYA transcriptional coactivator and phosphatase 4	1.32559	6.07095e-10
91452	ENSG00000107897	ACBD5	acyl-CoA binding domain containing 5	0.460908	6.12462e-10
10370	ENSG00000164442	CITED2	Cbp/p300 interacting transactivator with Glu/Asp rich carboxy-terminal domain 2	0.467072	6.18062e-10
30001	ENSG00000197930	ERO1A	endoplasmic reticulum oxidoreductase 1 alpha	-0.641575	6.25201e-10					-0.28126
140885	ENSG00000198053	SIRPA	signal regulatory protein alpha	-0.520712	6.35082e-10	0.473527	2.32013	1.39683		0.285645
9734	ENSG00000048052	HDAC9	histone deacetylase 9	-0.693366	6.40216e-10
55732	ENSG00000000460	C1orf112	chromosome 1 open reading frame 112	0.712199	6.40216e-10
11142	ENSG00000168734	PKIG	cAMP-dependent protein kinase inhibitor gamma	0.544155	6.43733e-10					0.311476
5054	ENSG00000106366	SERPINE1	serpin family E member 1	-0.733361	6.50269e-10		2.45056	2.45056		-1.03078	1.55638	-2.03931	-1.29014	-1.66473	SERPINE1	Matrisome-associated	ECM Regulators	SERPINE1
9585	ENSG00000138182	KIF20B	kinesin family member 20B	0.619922	6.52236e-10
652995	ENSG00000214049	UCA1	urothelial cancer associated 1	-1.09263	6.60134e-10
5865	ENSG00000169213	RAB3B	RAB3B, member RAS oncogene family	-0.925205	7.39514e-10		-0.208392	-0.208392		0.033712
7056	ENSG00000178726	THBD	thrombomodulin	-1.75705	8.10956e-10
5654	ENSG00000166033	HTRA1	HtrA serine peptidase 1	1.08098	8.74192e-10					0.64224	1.58234				HTRA1	Matrisome-associated	ECM Regulators	HTRA1
221935	ENSG00000146555	SDK1	sidekick cell adhesion molecule 1	-1.83071	8.82071e-10
3954	ENSG00000168924	LETM1	leucine zipper and EF-hand containing transmembrane protein 1	-0.667651	8.90589e-10		-0.369494	-0.369494
3339	ENSG00000142798	HSPG2	heparan sulfate proteoglycan 2	-1.02048	8.97289e-10		-0.545474	-0.545474		1.27054	-0.695146	-2.19915	-1.27136	-1.73526	HSPG2	Core matrisome	Proteoglycans	HSPG2
25934	ENSG00000136783	NIPSNAP3A	nipsnap homolog 3A	0.585548	9.02331e-10	0.612588	0.545424	0.579006	YES	0.512692
10559	ENSG00000164414	SLC35A1	solute carrier family 35 member A1	0.823192	9.27097e-10
2631	ENSG00000146729	NIPSNAP2	nipsnap homolog 2	0.590106	9.38402e-10
1130	ENSG00000143669	LYST	lysosomal trafficking regulator	0.65159	9.39661e-10
8453	ENSG00000108094	CUL2	cullin 2	0.572258	9.39661e-10		-0.203013	-0.203013		0.234184
8722	ENSG00000174080	CTSF	cathepsin F	-1.07684	9.39661e-10										CTSF	Matrisome-associated	ECM Regulators
11249	ENSG00000144227	NXPH2	neurexophilin 2	-1.83896	9.39661e-10
1119	ENSG00000110721	CHKA	choline kinase alpha	0.775879	9.44179e-10
5327	ENSG00000104368	PLAT	plasminogen activator, tissue type	-1.16959	9.50082e-10					-0.82988					PLAT	Matrisome-associated	ECM Regulators	PLAT
6604	ENSG00000082014	SMARCD3	SWI/SNF related, matrix associated, actin dependent regulator of chromatin, subfamily d, member 3	0.706423	9.99306e-10
79850	ENSG00000167695	FAM57A	family with sequence similarity 57 member A	-0.514951	1.01346e-09
57630	ENSG00000154447	SH3RF1	SH3 domain containing ring finger 1	-0.921663	1.07286e-09
945	ENSG00000105383	CD33	CD33 molecule	-1.43268	1.09852e-09
10090	ENSG00000111962	UST	uronyl 2-sulfotransferase	-1.66546	1.11783e-09
729993	ENSG00000237515	SHISA9	shisa family member 9	-0.98716	1.11783e-09
55100	ENSG00000082068	WDR70	WD repeat domain 70	0.481778	1.18546e-09	0.250113		0.250113
8738	ENSG00000169372	CRADD	CASP2 and RIPK1 domain containing adaptor with death domain	0.831592	1.19013e-09
3694	ENSG00000115221	ITGB6	integrin subunit beta 6	-1.24767	1.26512e-09	0.03492	0.424881	0.229901
1787	ENSG00000107614	TRDMT1	tRNA aspartic acid methyltransferase 1	0.724637	1.28511e-09
970	ENSG00000125726	CD70	CD70 molecule	0.548239	1.33361e-09
5590	ENSG00000067606	PRKCZ	protein kinase C zeta	-0.879233	1.34621e-09
57709	ENSG00000013293	SLC7A14	solute carrier family 7 member 14	-1.12508	1.3595e-09
301	ENSG00000135046	ANXA1	annexin A1	0.574699	1.36686e-09	0.434241	0.489605	0.461923		-1.19105		0.535541	0.281194	0.408367	ANXA1	Matrisome-associated	ECM-affiliated Proteins	ANXA1	ANXA1		ANXA1
2304	ENSG00000178919	FOXE1	forkhead box E1	-0.92394	1.40495e-09
3987	ENSG00000169756	LIMS1	LIM zinc finger domain containing 1	-0.5645	1.40495e-09					-0.0624825								LIMS1	LIMS1	LIMS1	LIMS1
10771	ENSG00000015171	ZMYND11	zinc finger MYND-type containing 11	0.588753	1.40495e-09
85453	ENSG00000180543	TSPYL5	TSPY like 5	-0.714178	1.4348e-09													TSPYL5
50944	ENSG00000161681	SHANK1	SH3 and multiple ankyrin repeat domains 1	-1.62881	1.53931e-09
158880	ENSG00000247746	USP51	ubiquitin specific peptidase 51	-1.67394	1.53931e-09
115273	ENSG00000188060	RAB42	RAB42, member RAS oncogene family	-0.967268	1.59406e-09
8877	ENSG00000176170	SPHK1	sphingosine kinase 1	-0.555895	1.66812e-09
51599	ENSG00000105699	LSR	lipolysis stimulated lipoprotein receptor	-0.535194	1.6749e-09					-0.772447
57449	ENSG00000171680	PLEKHG5	pleckstrin homology and RhoGEF domain containing G5	-0.580816	1.69461e-09
64077	ENSG00000107902	LHPP	phospholysine phosphohistidine inorganic pyrophosphate phosphatase	0.780453	1.73192e-09	1.72133	2.24551	1.98342	YES
5866	ENSG00000167994	RAB3IL1	RAB3A interacting protein like 1	1.52944	1.74493e-09
1993	ENSG00000107105	ELAVL2	ELAV like RNA binding protein 2	-0.825112	1.79169e-09
8028	ENSG00000078403	MLLT10	MLLT10, histone lysine methyltransferase DOT1L cofactor	0.679056	1.80545e-09
2888	ENSG00000115290	GRB14	growth factor receptor bound protein 14	-0.850352	1.87066e-09													GRB14
5575	ENSG00000188191	PRKAR1B	protein kinase cAMP-dependent type I regulatory subunit beta	-0.704388	1.87066e-09
64116	ENSG00000138821	SLC39A8	solute carrier family 39 member 8	-0.548085	1.8949e-09
79844	ENSG00000188818	ZDHHC11	zinc finger DHHC-type containing 11	1.56379	1.90731e-09
84287	ENSG00000171307	ZDHHC16	zinc finger DHHC-type containing 16	0.573247	1.9255e-09
152519	ENSG00000163293	NIPAL1	NIPA like domain containing 1	-1.06009	1.9255e-09
10231	ENSG00000172348	RCAN2	regulator of calcineurin 2	-1.74775	1.93725e-09
3655	ENSG00000091409	ITGA6	integrin subunit alpha 6	-0.648483	1.96061e-09													ITGA6		ITGA6	ITGA6
79004	ENSG00000107874	CUEDC2	CUE domain containing 2	0.689746	1.97627e-09
26071	ENSG00000203950	RTL8A	retrotransposon Gag like 8A	0.543363	1.97653e-09
64841	ENSG00000100522	GNPNAT1	glucosamine-phosphate N-acetyltransferase 1	-0.455332	2.04901e-09		-0.858697	-0.858697		-0.512235								GNPNAT1
133418	ENSG00000170571	EMB	embigin	-0.797557	2.05696e-09
22943	ENSG00000107984	DKK1	dickkopf WNT signaling pathway inhibitor 1	-1.22745	2.06283e-09													DKK1
8861	ENSG00000198728	LDB1	LIM domain binding 1	0.563571	2.10447e-09
54625	ENSG00000173193	PARP14	poly(ADP-ribose) polymerase family member 14	-0.875347	2.17447e-09
7090	ENSG00000140332	TLE3	transducin like enhancer of split 3	-0.923333	2.20424e-09	-1.01999		-1.01999
26272	ENSG00000151876	FBXO4	F-box protein 4	0.63293	2.24099e-09
5891	ENSG00000080823	MOK	MOK protein kinase	-0.540182	2.28265e-09
26047	ENSG00000174469	CNTNAP2	contactin associated protein like 2	-1.79525	2.31624e-09
26019	ENSG00000151461	UPF2	UPF2, regulator of nonsense mediated mRNA decay	0.505849	2.38446e-09
3110	ENSG00000130675	MNX1	motor neuron and pancreas homeobox 1	-1.30747	2.50093e-09
9902	ENSG00000011028	MRC2	mannose receptor C type 2	-0.642162	2.5766e-09	-0.220497	-0.117296	-0.168896		-0.105927
23531	ENSG00000108960	MMD	monocyte to macrophage differentiation associated	-0.597669	2.58913e-09
9448	ENSG00000071054	MAP4K4	mitogen-activated protein kinase kinase kinase kinase 4	-0.54144	2.66287e-09	-1.38127		-1.38127										MAP4K4
752	ENSG00000184922	FMNL1	formin like 1	-0.626703	2.70246e-09
9111	ENSG00000123609	NMI	N-myc and STAT interactor	-0.720274	2.76992e-09					-1.01747
1981	ENSG00000114867	EIF4G1	eukaryotic translation initiation factor 4 gamma 1	-0.562149	2.81575e-09	-0.40855	-0.285343	-0.346947		-0.25794
55258	ENSG00000144115	THNSL2	threonine synthase like 2	-1.1814	2.84182e-09
51232	ENSG00000150938	CRIM1	cysteine rich transmembrane BMP regulator 1	-0.804902	2.87579e-09					-0.057523					CRIM1	Core matrisome	ECM Glycoproteins
1958	ENSG00000120738	EGR1	early growth response 1	-0.930575	2.90824e-09
10622	ENSG00000113356	POLR3G	RNA polymerase III subunit G	0.600478	2.92143e-09
8100	ENSG00000032742	IFT88	intraflagellar transport 88	0.808826	3.07871e-09
85416	ENSG00000139800	ZIC5	Zic family member 5	1.78546	3.0849e-09
123920	ENSG00000140931	CMTM3	CKLF like MARVEL transmembrane domain containing 3	-0.482881	3.09199e-09
83716	ENSG00000103196	CRISPLD2	cysteine rich secretory protein LCCL domain containing 2	0.622577	3.13671e-09					2.71545	2.6802	0.377538	1.57318	0.975359	CRISPLD2	Core matrisome	ECM Glycoproteins	CRISPLD2
7127	ENSG00000185215	TNFAIP2	TNF alpha induced protein 2	-0.474385	3.15939e-09
2113	ENSG00000134954	ETS1	ETS proto-oncogene 1, transcription factor	-0.441429	3.21339e-09
81704	ENSG00000107099	DOCK8	dedicator of cytokinesis 8	-1.77044	3.29669e-09
4698	ENSG00000128609	NDUFA5	NADH:ubiquinone oxidoreductase subunit A5	0.560499	3.32569e-09	0.219463	0.27535	0.247406										NDUFA5
4549	NA	RNR1	s-rRNA	0.718744	3.35538e-09
7223	ENSG00000133107	TRPC4	transient receptor potential cation channel subfamily C member 4	0.66173	3.40138e-09
81930	ENSG00000121621	KIF18A	kinesin family member 18A	0.520432	3.46806e-09
160335	ENSG00000179104	TMTC2	transmembrane and tetratricopeptide repeat containing 2	-1.33802	3.89306e-09
401397	ENSG00000214194	SMIM30	small integral membrane protein 30	0.588162	4.01214e-09
10514	ENSG00000132382	MYBBP1A	MYB binding protein 1a	-0.488666	4.06352e-09	-0.554697	-0.298189	-0.426443										MYBBP1A
55612	ENSG00000101311	FERMT1	fermitin family member 1	-0.856047	4.18381e-09
23411	ENSG00000096717	SIRT1	sirtuin 1	0.477495	4.30044e-09
48	ENSG00000122729	ACO1	aconitase 1	-0.463142	4.33082e-09	-0.694415	-0.473943	-0.584179		-0.445581								ACO1
59269	ENSG00000127124	HIVEP3	human immunodeficiency virus type I enhancer binding protein 3	-1.06819	4.39102e-09
80303	ENSG00000115468	EFHD1	EF-hand domain family member D1	1.10972	4.53534e-09
11259	ENSG00000168386	FILIP1L	filamin A interacting protein 1 like	0.699431	4.58177e-09	2.29343		2.29343
10972	ENSG00000170348	TMED10	transmembrane p24 trafficking protein 10	-0.386133	4.6227e-09	0.0511633	0.0511749	0.0511691			-1.26622							TMED10
8440	ENSG00000071051	NCK2	NCK adaptor protein 2	-0.538398	4.65291e-09													NCK2		NCK2	NCK2
989	ENSG00000122545	39326	septin 7	0.450617	4.74734e-09
5792	ENSG00000142949	PTPRF	protein tyrosine phosphatase, receptor type F	-0.605796	4.77139e-09					0.695956		-0.944334	-0.0750184	-0.509676
4285	ENSG00000027001	MIPEP	mitochondrial intermediate peptidase	0.565381	4.83565e-09					0.375393
119504	ENSG00000166295	ANAPC16	anaphase promoting complex subunit 16	0.700014	4.98762e-09
56180	ENSG00000101928	MOSPD1	motile sperm domain containing 1	0.558089	5.08615e-09
3777	ENSG00000171303	KCNK3	potassium two pore domain channel subfamily K member 3	-1.11221	5.12536e-09
151827	ENSG00000171757	LRRC34	leucine rich repeat containing 34	0.781926	5.34102e-09
161742	ENSG00000166068	SPRED1	sprouty related EVH1 domain containing 1	-0.712609	5.43081e-09
337867	ENSG00000134882	UBAC2	UBA domain containing 2	0.513225	5.51156e-09
10158	ENSG00000162366	PDZK1IP1	PDZK1 interacting protein 1	-0.799647	5.57234e-09		-3.07871	-3.07871
8797	ENSG00000104689	TNFRSF10A	TNF receptor superfamily member 10a	-0.966499	5.57649e-09
23234	ENSG00000213551	DNAJC9	DnaJ heat shock protein family (Hsp40) member C9	0.508688	5.6762e-09	0.368601	0.39798	0.383291		0.0573207								DNAJC9
6772	ENSG00000115415	STAT1	signal transducer and activator of transcription 1	-0.586293	5.73188e-09	-1.37808	-1.47664	-1.42736	YES	-1.43139	-1.62328	-0.179638	-0.637693	-0.408666				STAT1
83988	ENSG00000104490	NCALD	neurocalcin delta	-1.74217	5.75893e-09
677	ENSG00000185650	ZFP36L1	ZFP36 ring finger protein like 1	-0.727376	5.85203e-09	-0.612946		-0.612946
93010	ENSG00000156966	B3GNT7	UDP-GlcNAc:betaGal beta-1,3-N-acetylglucosaminyltransferase 7	-1.24631	5.95556e-09					-0.700056
79365	ENSG00000123095	BHLHE41	basic helix-loop-helix family member e41	-0.754625	6.07606e-09
56271	ENSG00000102409	BEX4	brain expressed X-linked 4	-0.743323	6.30112e-09
51422	ENSG00000106617	PRKAG2	protein kinase AMP-activated non-catalytic subunit gamma 2	0.494703	6.33182e-09
54726	ENSG00000164164	OTUD4	OTU deubiquitinase 4	-0.675359	6.48669e-09	0.125387		0.125387
5817	ENSG00000073008	PVR	poliovirus receptor	-0.61513	6.57415e-09		-0.373954	-0.373954		-0.50309
55691	ENSG00000151474	FRMD4A	FERM domain containing 4A	0.604585	6.6359e-09													FRMD4A
53827	ENSG00000089327	FXYD5	FXYD domain containing ion transport regulator 5	-0.680658	6.64237e-09
339263	ENSG00000212719	C17orf51	chromosome 17 open reading frame 51	-0.573703	6.72689e-09
9208	ENSG00000124831	LRRFIP1	LRR binding FLII interacting protein 1	-0.477304	6.76903e-09	-0.71	-0.697863	-0.703932		-0.711575								LRRFIP1
23231	ENSG00000091490	SEL1L3	SEL1L family member 3	-0.818356	6.79825e-09
688	ENSG00000102554	KLF5	Kruppel like factor 5	-0.761404	6.86764e-09
54899	ENSG00000168297	PXK	PX domain containing serine/threonine kinase like	0.517617	7.01171e-09													PXK
84986	ENSG00000213390	ARHGAP19	Rho GTPase activating protein 19	0.613202	7.01936e-09
22931	ENSG00000099246	RAB18	RAB18, member RAS oncogene family	0.539717	7.21088e-09		0.830973	0.830973										RAB18
399818	ENSG00000203791	EEF1AKMT2	EEF1A lysine methyltransferase 2	0.581149	7.4535e-09
5155	ENSG00000100311	PDGFB	platelet derived growth factor subunit B	-0.653446	7.61603e-09										PDGFB	Matrisome-associated	Secreted Factors
4522	ENSG00000100714	MTHFD1	methylenetetrahydrofolate dehydrogenase, cyclohydrolase and formyltetrahydrofolate synthetase 1	-0.441678	7.68263e-09	-0.721135	-0.708761	-0.714948		-0.708423								MTHFD1
51310	ENSG00000092096	SLC22A17	solute carrier family 22 member 17	-0.820316	7.68263e-09
163702	ENSG00000185436	IFNLR1	interferon lambda receptor 1	-0.982236	7.68263e-09
624	ENSG00000168398	BDKRB2	bradykinin receptor B2	1.40466	7.87942e-09
3257	ENSG00000107521	HPS1	HPS1, biogenesis of lysosomal organelles complex 3 subunit 1	0.452664	7.92253e-09
10791	ENSG00000168899	VAMP5	vesicle associated membrane protein 5	-1.11733	8.01754e-09	-0.341172	-0.115699	-0.228435										VAMP5
5045	ENSG00000140564	FURIN	furin, paired basic amino acid cleaving enzyme	-0.61574	8.22192e-09
84910	ENSG00000153214	TMEM87B	transmembrane protein 87B	-0.625905	8.45019e-09
1002	ENSG00000179242	CDH4	cadherin 4	-1.48868	8.64861e-09
286826	ENSG00000183814	LIN9	lin-9 DREAM MuvB core complex component	0.483478	8.64861e-09
1869	ENSG00000101412	E2F1	E2F transcription factor 1	0.552725	8.8767e-09
57337	ENSG00000138468	SENP7	SUMO specific peptidase 7	0.789188	8.9221e-09
11013	ENSG00000158164	TMSB15A	thymosin beta 15a	1.20324	8.92739e-09
340719	ENSG00000188613	NANOS1	nanos C2HC-type zinc finger 1	0.861307	9.08477e-09
828	ENSG00000105519	CAPS	calcyphosine	0.926386	9.80482e-09
10556	ENSG00000148688	RPP30	ribonuclease P/MRP subunit p30	0.627755	9.80482e-09	-0.075064	0.105923	0.0154297
8507	ENSG00000171617	ENC1	ectodermal-neural cortex 1	-0.514664	1.00945e-08
50507	ENSG00000086991	NOX4	NADPH oxidase 4	-1.3531	1.03154e-08
10398	ENSG00000101335	MYL9	myosin light chain 9	0.459682	1.10872e-08	1.22107	1.23338	1.22723		0.706854	-0.807911							MYL9
10085	ENSG00000164176	EDIL3	EGF like repeats and discoidin domains 3	0.435011	1.22368e-08	2.22605	2.55165	2.38885		1.24449	1.187				EDIL3	Core matrisome	ECM Glycoproteins
4603	ENSG00000185697	MYBL1	MYB proto-oncogene like 1	0.467329	1.22728e-08
29966	ENSG00000196792	STRN3	striatin 3	-0.474097	1.25458e-08					-0.120897								STRN3
91010	ENSG00000161791	FMNL3	formin like 3	-0.746951	1.25992e-08	-0.165677	0.159831	-0.00292312										FMNL3
678	ENSG00000152518	ZFP36L2	ZFP36 ring finger protein like 2	-0.796958	1.26436e-08
65059	ENSG00000173166	RAPH1	Ras association (RalGDS/AF-6) and pleckstrin homology domains 1	-0.712804	1.2674e-08	-0.00533339	0.0545721	0.0246193
60492	ENSG00000137500	CCDC90B	coiled-coil domain containing 90B	0.523106	1.30492e-08		0.352787	0.352787
642938	ENSG00000188916	INSYN2	inhibitory synaptic factor 2A	1.37976	1.30492e-08
2665	ENSG00000057608	GDI2	GDP dissociation inhibitor 2	0.512251	1.33956e-08	0.102188	0.426218	0.264203		0.210927								GDI2
6928	ENSG00000275410	HNF1B	HNF1 homeobox B	-0.809925	1.35325e-08
57602	ENSG00000055483	USP36	ubiquitin specific peptidase 36	-0.544222	1.36399e-08
8672	ENSG00000075151	EIF4G3	eukaryotic translation initiation factor 4 gamma 3	-0.627739	1.36536e-08	-0.1331	-0.391218	-0.262159										EIF4G3
161424	ENSG00000196943	NOP9	NOP9 nucleolar protein	-0.506807	1.3964e-08													NOP9
5106	ENSG00000100889	PCK2	phosphoenolpyruvate carboxykinase 2, mitochondrial	-0.528708	1.41931e-08	-0.688055	-0.204391	-0.446223		-0.945724								PCK2
51809	ENSG00000109586	GALNT7	polypeptide N-acetylgalactosaminyltransferase 7	-0.41315	1.41931e-08					-0.698918
55421	ENSG00000074356	NCBP3	nuclear cap binding subunit 3	-0.429469	1.42869e-08
352954	ENSG00000239521	CASTOR3	CASTOR family member 3	0.644154	1.45122e-08
147463	ENSG00000154065	ANKRD29	ankyrin repeat domain 29	1.33763	1.45676e-08
79132	ENSG00000108771	DHX58	DExH-box helicase 58	-0.891273	1.47423e-08
6429	ENSG00000116350	SRSF4	serine and arginine rich splicing factor 4	-0.435899	1.48709e-08	-0.165855		-0.165855
79591	ENSG00000120029	ARMH3	armadillo-like helical domain containing 3	0.499456	1.49584e-08
392255	ENSG00000156466	GDF6	growth differentiation factor 6	-1.02097	1.50744e-08						2.29435				GDF6	Matrisome-associated	Secreted Factors
116228	ENSG00000203667	COX20	cytochrome c oxidase assembly factor COX20	0.542055	1.58989e-08		-0.211261	-0.211261
22905	ENSG00000072134	EPN2	epsin 2	-0.917422	1.61535e-08
1031	ENSG00000123080	CDKN2C	cyclin dependent kinase inhibitor 2C	0.507792	1.62681e-08
256126	ENSG00000161860	SYCE2	synaptonemal complex central element protein 2	1.13569	1.64642e-08
4645	ENSG00000167306	MYO5B	myosin VB	-0.962754	1.67883e-08
79751	ENSG00000177542	SLC25A22	solute carrier family 25 member 22	-0.569068	1.69728e-08		-0.939603	-0.939603
9466	ENSG00000104998	IL27RA	interleukin 27 receptor subunit alpha	-0.750538	1.7152e-08		-0.0311128	-0.0311128
162461	ENSG00000167105	TMEM92	transmembrane protein 92	-0.662282	1.71857e-08
54436	ENSG00000125089	SH3TC1	SH3 domain and tetratricopeptide repeats 1	-0.875948	1.78235e-08
26099	ENSG00000055070	SZRD1	SUZ RNA binding domain containing 1	-0.368452	1.80493e-08	-0.288999		-0.288999
9340	ENSG00000065325	GLP2R	glucagon like peptide 2 receptor	1.33911	1.85565e-08
221336	ENSG00000151917	BEND6	BEN domain containing 6	0.76951	1.92784e-08
1743	ENSG00000119689	DLST	dihydrolipoamide S-succinyltransferase	-0.391007	1.93171e-08	-0.71345	-0.533763	-0.623606		-0.935856	-0.912374	-1.22398	-1.42171	-1.32284				DLST
51441	ENSG00000198492	YTHDF2	YTH N6-methyladenosine RNA binding protein 2	-0.535156	1.94222e-08	-0.390094	-0.326422	-0.358258										YTHDF2
55222	ENSG00000172731	LRRC20	leucine rich repeat containing 20	0.554681	1.99255e-08
80321	ENSG00000114107	CEP70	centrosomal protein 70	0.709694	2.02478e-08
5069	ENSG00000182752	PAPPA	pappalysin 1	-0.951835	2.03216e-08										PAPPA	Matrisome-associated	ECM Regulators
84223	ENSG00000114473	IQCG	IQ motif containing G	0.734968	2.04881e-08
25913	ENSG00000128513	POT1	protection of telomeres 1	0.596819	2.06818e-08
3718	ENSG00000105639	JAK3	Janus kinase 3	-1.2194	2.09774e-08
6324	ENSG00000105711	SCN1B	sodium voltage-gated channel beta subunit 1	0.80639	2.11604e-08
9289	ENSG00000205336	ADGRG1	adhesion G protein-coupled receptor G1	-0.735991	2.11791e-08
123096	ENSG00000197119	SLC25A29	solute carrier family 25 member 29	-0.550876	2.12181e-08
94240	ENSG00000133106	EPSTI1	epithelial stromal interaction 1	-1.18884	2.1508e-08
2619	ENSG00000180447	GAS1	growth arrest specific 1	-1.26327	2.21399e-08
94134	ENSG00000165322	ARHGAP12	Rho GTPase activating protein 12	0.51896	2.21818e-08
220002	ENSG00000162144	CYB561A3	cytochrome b561 family member A3	0.482341	2.21818e-08
4345	ENSG00000091972	CD200	CD200 molecule	-1.53562	2.23537e-08
10891	ENSG00000109819	PPARGC1A	PPARG coactivator 1 alpha	-1.54859	2.23537e-08
3176	ENSG00000150540	HNMT	histamine N-methyltransferase	-1.05981	2.25824e-08
114876	ENSG00000141447	OSBPL1A	oxysterol binding protein like 1A	0.495847	2.33168e-08													OSBPL1A
1021	ENSG00000105810	CDK6	cyclin dependent kinase 6	-0.905382	2.39914e-08	0.593019	0.598501	0.59576	YES
4126	ENSG00000109323	MANBA	mannosidase beta	-0.791648	2.39914e-08
3911	ENSG00000130702	LAMA5	laminin subunit alpha 5	-0.925115	2.41745e-08					1.25752	-1.69867	-2.30358	0.124328	-1.08962	LAMA5	Core matrisome	ECM Glycoproteins	LAMA5
10121	ENSG00000138107	ACTR1A	ARP1 actin related protein 1 homolog A	0.469487	2.43279e-08	0.5007	0.517358	0.509029		0.271514	-0.711161	1.15473	0.642655	0.898693				ACTR1A
2028	ENSG00000138792	ENPEP	glutamyl aminopeptidase	-1.37783	2.46908e-08													ENPEP
8724	ENSG00000112335	SNX3	sorting nexin 3	0.609572	2.48891e-08	0.51339	0.607814	0.560602	YES	0.57221								SNX3
7581	ENSG00000189180	ZNF33A	zinc finger protein 33A	0.714651	2.49865e-08
116138	ENSG00000124702	KLHDC3	kelch domain containing 3	0.418551	2.51182e-08
81792	ENSG00000151388	ADAMTS12	ADAM metallopeptidase with thrombospondin type 1 motif 12	-0.625105	2.51768e-08					-0.00876007					ADAMTS12	Matrisome-associated	ECM Regulators
11319	ENSG00000122882	ECD	ecdysoneless cell cycle regulator	0.615104	2.52776e-08		0.00335094	0.00335094
2180	ENSG00000151726	ACSL1	acyl-CoA synthetase long chain family member 1	-0.486441	2.53841e-08	-0.45797	-0.733181	-0.595575
26033	ENSG00000107518	ATRNL1	attractin like 1	0.728821	2.54995e-08
9308	ENSG00000112149	CD83	CD83 molecule	-0.810157	2.57978e-08
55143	ENSG00000134690	CDCA8	cell division cycle associated 8	-0.424247	2.57978e-08
89848	ENSG00000197948	FCHSD1	FCH and double SH3 domains 1	0.485658	2.68061e-08
6850	ENSG00000165025	SYK	spleen associated tyrosine kinase	-1.68418	2.68434e-08
439	ENSG00000198356	ASNA1	arsA arsenite transporter, ATP-binding, homolog 1 (bacterial)	0.55448	2.7181e-08	0.506602	0.644871	0.575736	YES	0.360668
4494	ENSG00000198417	MT1F	metallothionein 1F	-0.941859	2.7181e-08
55827	ENSG00000143164	DCAF6	DDB1 and CUL4 associated factor 6	0.531254	2.7181e-08
79892	ENSG00000197771	MCMBP	minichromosome maintenance complex binding protein	0.544977	2.7181e-08					0.431647
1294	ENSG00000114270	COL7A1	collagen type VII alpha 1 chain	-0.47209	2.73497e-08	-0.725971	-0.580049	-0.65301		-1.08333					COL7A1	Core matrisome	Collagens
131578	ENSG00000172061	LRRC15	leucine rich repeat containing 15	1.19293	2.73813e-08		-3.08879	-3.08879										LRRC15
5271	ENSG00000166401	SERPINB8	serpin family B member 8	-0.516502	2.78249e-08					-0.635441					SERPINB8	Matrisome-associated	ECM Regulators
4300	ENSG00000171843	MLLT3	MLLT3, super elongation complex subunit	-0.749964	2.85304e-08
118980	ENSG00000156398	SFXN2	sideroflexin 2	0.531547	2.85548e-08	0.439464		0.439464
80380	ENSG00000197646	PDCD1LG2	programmed cell death 1 ligand 2	-0.946321	3.04411e-08
5825	ENSG00000117528	ABCD3	ATP binding cassette subfamily D member 3	0.435359	3.22995e-08		0.0281309	0.0281309
23283	ENSG00000177613	CSTF2T	cleavage stimulation factor subunit 2 tau variant	0.377378	3.24254e-08
6525	ENSG00000183963	SMTN	smoothelin	-0.581188	3.32776e-08	0.220578	0.438542	0.32956										SMTN
8031	ENSG00000266412	NCOA4	nuclear receptor coactivator 4	0.567258	3.33592e-08
4361	ENSG00000020922	MRE11	MRE11 homolog, double strand break repair nuclease	0.481124	3.43101e-08					0.501482
55954	ENSG00000100319	ZMAT5	zinc finger matrin-type 5	0.769128	3.46301e-08
2114	ENSG00000157557	ETS2	ETS proto-oncogene 2, transcription factor	-0.508935	3.47137e-08
7113	ENSG00000184012	TMPRSS2	transmembrane serine protease 2	-1.66945	3.53219e-08
79695	ENSG00000119514	GALNT12	polypeptide N-acetylgalactosaminyltransferase 12	-0.719304	3.53661e-08
112942	ENSG00000163001	CFAP36	cilia and flagella associated protein 36	0.544636	3.57864e-08
4851	ENSG00000148400	NOTCH1	notch 1	-0.922014	3.59586e-08
51147	ENSG00000111653	ING4	inhibitor of growth family member 4	0.676879	3.59586e-08
145581	ENSG00000165379	LRFN5	leucine rich repeat and fibronectin type III domain containing 5	-1.55665	3.59586e-08
219749	ENSG00000175395	ZNF25	zinc finger protein 25	0.745926	3.61747e-08
64859	ENSG00000173559	NABP1	nucleic acid binding protein 1	-0.519641	3.73674e-08
9702	ENSG00000166037	CEP57	centrosomal protein 57	0.420525	3.81984e-08
144100	ENSG00000166689	PLEKHA7	pleckstrin homology domain containing A7	0.824545	3.81984e-08
4013	ENSG00000110002	VWA5A	von Willebrand factor A domain containing 5A	0.778128	3.92211e-08										VWA5A	Core matrisome	ECM Glycoproteins	VWA5A
51108	ENSG00000197006	METTL9	methyltransferase like 9	0.494773	3.93169e-08
6297	ENSG00000165821	SALL2	spalt like transcription factor 2	-0.944033	3.95243e-08
3730	ENSG00000011201	ANOS1	anosmin 1	-1.66025	3.9532e-08
8572	ENSG00000131435	PDLIM4	PDZ and LIM domain 4	-1.6384	4.04492e-08													PDLIM4
374860	ENSG00000180777	ANKRD30B	ankyrin repeat domain 30B	1.46252	4.24351e-08
79754	ENSG00000196372	ASB13	ankyrin repeat and SOCS box containing 13	0.62825	4.38806e-08
128434	ENSG00000132821	VSTM2L	V-set and transmembrane domain containing 2 like	1.34994	4.40905e-08
322	ENSG00000166313	APBB1	amyloid beta precursor protein binding family B member 1	0.429574	4.41224e-08
283078	ENSG00000150051	MKX	mohawk homeobox	-0.620758	4.44125e-08
51274	ENSG00000109787	KLF3	Kruppel like factor 3	-0.590638	4.4645e-08
100126784	NA	LOC100126784	uncharacterized LOC100126784	-0.871411	4.56412e-08
29933	ENSG00000183484	GPR132	G protein-coupled receptor 132	-1.20208	4.66989e-08
23770	ENSG00000105701	FKBP8	FK506 binding protein 8	0.414034	4.68411e-08		-0.0234683	-0.0234683
10063	ENSG00000138495	COX17	cytochrome c oxidase copper chaperone COX17	0.827642	4.83874e-08
220930	ENSG00000237036	ZEB1-AS1	ZEB1 antisense RNA 1	0.728428	4.859e-08
51008	ENSG00000138303	ASCC1	activating signal cointegrator 1 complex subunit 1	0.488509	4.86357e-08													ASCC1
1848	ENSG00000139318	DUSP6	dual specificity phosphatase 6	-0.962448	4.88035e-08
5660	ENSG00000197746	PSAP	prosaposin	0.396608	4.97876e-08	1.10554	1.48859	1.29707		2.33196
128338	ENSG00000156171	DRAM2	DNA damage regulated autophagy modulator 2	0.584368	4.97876e-08
22883	ENSG00000171603	CLSTN1	calsyntenin 1	-0.704572	4.98465e-08					-0.0991263
7412	ENSG00000162692	VCAM1	vascular cell adhesion molecule 1	-1.28203	5.00859e-08					-1.52749
6710	ENSG00000070182	SPTB	spectrin beta, erythrocytic	-1.48797	5.02695e-08
6723	ENSG00000116649	SRM	spermidine synthase	-0.646887	5.06849e-08	-0.379564	-0.370499	-0.375031		-0.43378								SRM
119392	ENSG00000156384	SFR1	SWI5 dependent homologous recombination repair protein 1	0.712131	5.13435e-08
57535	ENSG00000116299	KIAA1324	KIAA1324	1.17544	5.41089e-08
79932	ENSG00000142687	KIAA0319L	KIAA0319 like	-0.4753	5.43664e-08
161357	ENSG00000139915	MDGA2	MAM domain containing glycosylphosphatidylinositol anchor 2	-1.53917	5.52624e-08
9937	ENSG00000198924	DCLRE1A	DNA cross-link repair 1A	0.556216	5.82098e-08
10602	ENSG00000163171	CDC42EP3	CDC42 effector protein 3	-0.653987	6.03015e-08	1.6249		1.6249
27244	ENSG00000080546	SESN1	sestrin 1	0.717047	6.07642e-08
7837	ENSG00000130508	PXDN	peroxidasin	-0.904275	6.27344e-08		-0.503451	-0.503451		-0.0791146	0.149038	-1.39276	-0.143086	-0.767922	PXDN	Core matrisome	ECM Glycoproteins	PXDN
79980	ENSG00000149636	DSN1	DSN1 homolog, MIS12 kinetochore complex component	0.541631	6.85392e-08
55061	ENSG00000143502	SUSD4	sushi domain containing 4	0.779418	7.00365e-08
3728	ENSG00000173801	JUP	junction plakoglobin	-0.589499	7.35253e-08		-0.188021	-0.188021		-0.247214	-0.507951	-0.736302	-0.286902	-0.511602
829	ENSG00000116489	CAPZA1	capping actin protein of muscle Z-line subunit alpha 1	0.363109	7.41236e-08	-0.236079	-0.210888	-0.223483		-0.145122		-0.0661236	-0.250989	-0.158556				CAPZA1
5362	ENSG00000076356	PLXNA2	plexin A2	-1.38299	7.43943e-08										PLXNA2	Matrisome-associated	ECM-affiliated Proteins
55286	ENSG00000154274	C4orf19	chromosome 4 open reading frame 19	-1.33597	7.54845e-08
6643	ENSG00000205302	SNX2	sorting nexin 2	0.446608	7.63548e-08	0.372952	0.583095	0.478024		-0.0844631
9871	ENSG00000150961	SEC24D	SEC24 homolog D, COPII coat complex component	-0.479564	7.73262e-08	-0.446148	-0.463936	-0.455042		-0.0348979
729582	ENSG00000231672	DIRC3	disrupted in renal carcinoma 3	-1.54444	7.73262e-08
8204	ENSG00000180530	NRIP1	nuclear receptor interacting protein 1	-0.644947	8.02368e-08
29126	ENSG00000120217	CD274	CD274 molecule	-0.466024	8.05833e-08		-0.0690147	-0.0690147
57680	ENSG00000100888	CHD8	chromodomain helicase DNA binding protein 8	-0.661664	8.07536e-08
7804	ENSG00000157193	LRP8	LDL receptor related protein 8	-0.587533	8.12588e-08
23530	ENSG00000112992	NNT	nicotinamide nucleotide transhydrogenase	0.525117	8.25227e-08	0.524365	0.680983	0.602674	YES
55586	ENSG00000100253	MIOX	myo-inositol oxygenase	-1.14335	8.33103e-08
51116	ENSG00000122140	MRPS2	mitochondrial ribosomal protein S2	-0.46703	8.39437e-08	-0.194675	-0.437441	-0.316058
84893	ENSG00000134452	FBH1	F-box DNA helicase 1	0.474694	8.52704e-08
10484	ENSG00000100934	SEC23A	Sec23 homolog A, coat complex II component	-0.389613	8.5389e-08	-0.142799	-0.0367495	-0.0897744		0.0913576		0.782273	0.260267	0.52127				SEC23A
574036	ENSG00000203706	SERTAD4-AS1	SERTAD4 antisense RNA 1	0.823917	8.69663e-08
2733	ENSG00000119392	GLE1	GLE1, RNA export mediator	0.420641	8.8452e-08
1174	ENSG00000106367	AP1S1	adaptor related protein complex 1 subunit sigma 1	0.561186	8.96931e-08	-0.0408827	0.052865	0.00599114		0.15963								AP1S1
6944	ENSG00000163159	VPS72	vacuolar protein sorting 72 homolog	0.551594	8.98283e-08
80314	ENSG00000120616	EPC1	enhancer of polycomb homolog 1	0.602463	9.02797e-08
2139	ENSG00000064655	EYA2	EYA transcriptional coactivator and phosphatase 2	1.60637	9.07677e-08
399821	ENSG00000224023	FLJ37035	uncharacterized LOC399821	1.37658	9.2948e-08
4303	ENSG00000184481	FOXO4	forkhead box O4	0.88397	9.38085e-08
1482	ENSG00000183072	NKX2-5	NK2 homeobox 5	-1.62274	9.49509e-08
57568	ENSG00000116991	SIPA1L2	signal induced proliferation associated 1 like 2	0.730986	9.49509e-08		1.12146	1.12146		0.362764								SIPA1L2
6624	ENSG00000075618	FSCN1	fascin actin-bundling protein 1	-0.509471	9.63914e-08	0.53077	0.631042	0.580906	YES	0.0645534	-0.973117	0.542248	0.702746	0.622497				FSCN1
5368	ENSG00000168081	PNOC	prepronociceptin	1.3211	9.67656e-08
112817	ENSG00000241935	HOGA1	4-hydroxy-2-oxoglutarate aldolase 1	0.669214	9.67656e-08
55898	ENSG00000140553	UNC45A	unc-45 myosin chaperone A	-0.434392	9.93485e-08	-0.178257	-0.38659	-0.282424		-0.175303								UNC45A
84929	ENSG00000130720	FIBCD1	fibrinogen C domain containing 1	0.999049	1.04356e-07
9369	ENSG00000021645	NRXN3	neurexin 3	-0.977418	1.04651e-07
25819	ENSG00000151014	NOCT	nocturnin	-0.926164	1.05707e-07
7498	ENSG00000158125	XDH	xanthine dehydrogenase	-0.975199	1.09064e-07
85236	ENSG00000197903	HIST1H2BK	histone cluster 1 H2B family member k	0.669936	1.09211e-07													HIST1H2BK
5440	ENSG00000147669	POLR2K	RNA polymerase II subunit K	0.608337	1.10778e-07
81876	ENSG00000174903	RAB1B	RAB1B, member RAS oncogene family	0.380962	1.12719e-07	0.09815	0.0994326	0.0987913		-0.221372
2948	ENSG00000168765	GSTM4	glutathione S-transferase mu 4	0.602062	1.14634e-07					0.0725506
9698	ENSG00000134644	PUM1	pumilio RNA binding family member 1	-0.445957	1.1735e-07	-0.430217	-0.210638	-0.320428										PUM1
79982	ENSG00000164031	DNAJB14	DnaJ heat shock protein family (Hsp40) member B14	-0.570527	1.17638e-07
80201	ENSG00000156510	HKDC1	hexokinase domain containing 1	0.513307	1.20378e-07
26499	ENSG00000100558	PLEK2	pleckstrin 2	-0.579245	1.26915e-07
3489	ENSG00000167779	IGFBP6	insulin like growth factor binding protein 6	0.576468	1.26972e-07					0.775521					IGFBP6	Core matrisome	ECM Glycoproteins	IGFBP6
645638	ENSG00000261040	WFDC21P	WAP four-disulfide core domain 21, pseudogene	1.26929	1.29272e-07
4752	ENSG00000136098	NEK3	NIMA related kinase 3	0.596187	1.30542e-07
3646	ENSG00000104408	EIF3E	eukaryotic translation initiation factor 3 subunit E	0.438446	1.3097e-07		0.0406156	0.0406156		0.370041
114818	ENSG00000119771	KLHL29	kelch like family member 29	-1.04871	1.34313e-07
5690	ENSG00000126067	PSMB2	proteasome subunit beta 2	-0.388812	1.35314e-07	-0.198924	-0.187261	-0.193093		-0.275073								PSMB2
286144	ENSG00000205133	TRIQK	triple QxxK/R motif containing	0.464941	1.36806e-07
79147	ENSG00000181027	FKRP	fukutin related protein	-0.506643	1.37026e-07
3659	ENSG00000125347	IRF1	interferon regulatory factor 1	-0.594712	1.37566e-07
10964	ENSG00000137959	IFI44L	interferon induced protein 44 like	-1.59593	1.38021e-07
760	ENSG00000104267	CA2	carbonic anhydrase 2	-1.59849	1.38167e-07
57088	ENSG00000114698	PLSCR4	phospholipid scramblase 4	-1.48679	1.38167e-07
10157	ENSG00000008311	AASS	aminoadipate-semialdehyde synthase	-0.787715	1.39415e-07
79053	ENSG00000159063	ALG8	ALG8, alpha-1,3-glucosyltransferase	0.468467	1.39415e-07
55333	ENSG00000213463	SYNJ2BP	synaptojanin 2 binding protein	-0.536152	1.43153e-07
10611	ENSG00000163110	PDLIM5	PDZ and LIM domain 5	-0.641915	1.43296e-07	-0.303597	-0.39846	-0.351028		-0.626829		-0.671656	-0.500565	-0.58611				PDLIM5	PDLIM5		PDLIM5
873	ENSG00000159228	CBR1	carbonyl reductase 1	-1.04423	1.43331e-07	-0.606628	-0.777956	-0.692292	YES	-1.38629								CBR1
9748	ENSG00000065613	SLK	STE20 like kinase	0.517661	1.43331e-07		0.496692	0.496692		0.107235
56252	ENSG00000119596	YLPM1	YLP motif containing 1	-0.6492	1.45944e-07	0.0366088	-0.0593553	-0.0113732		-0.689992
64430	ENSG00000126773	PCNX4	pecanex 4	-0.460749	1.48333e-07
597	ENSG00000140379	BCL2A1	BCL2 related protein A1	-1.54632	1.49131e-07
9975	ENSG00000174738	NR1D2	nuclear receptor subfamily 1 group D member 2	0.463139	1.50027e-07
8609	ENSG00000118263	KLF7	Kruppel like factor 7	-0.694462	1.50305e-07
5021	ENSG00000180914	OXTR	oxytocin receptor	-0.91377	1.5079e-07
9388	ENSG00000101670	LIPG	lipase G, endothelial type	-0.985557	1.54354e-07					-0.932861	1.00955
90853	ENSG00000134668	SPOCD1	SPOC domain containing 1	-0.660855	1.58959e-07
149076	ENSG00000160094	ZNF362	zinc finger protein 362	-0.598669	1.58966e-07
6713	ENSG00000104549	SQLE	squalene epoxidase	-0.500718	1.60159e-07
10507	ENSG00000187764	SEMA4D	semaphorin 4D	-0.976386	1.61209e-07										SEMA4D	Matrisome-associated	ECM-affiliated Proteins
8813	ENSG00000000419	DPM1	dolichyl-phosphate mannosyltransferase subunit 1, catalytic	0.576389	1.61383e-07		0.605618	0.605618										DPM1
374986	ENSG00000180488	MIGA1	mitoguardin 1	-0.571037	1.64535e-07
1717	ENSG00000172893	DHCR7	7-dehydrocholesterol reductase	-0.524049	1.65792e-07
5701	ENSG00000161057	PSMC2	proteasome 26S subunit, ATPase 2	0.466823	1.66863e-07	-0.260186	-0.113167	-0.186677		-0.0578901
170371	ENSG00000204161	TMEM273	transmembrane protein 273	1.14177	1.66863e-07
57089	ENSG00000198018	ENTPD7	ectonucleoside triphosphate diphosphohydrolase 7	-0.608099	1.67759e-07
5019	ENSG00000083720	OXCT1	3-oxoacid CoA-transferase 1	0.375914	1.69875e-07	-0.0711939	0.0326838	-0.019255		0.765371
54463	ENSG00000154153	RETREG1	reticulophagy regulator 1	-1.01517	1.70752e-07
3029	ENSG00000063854	HAGH	hydroxyacylglutathione hydrolase	0.509016	1.74693e-07	0.532068	0.651382	0.591725	YES	0.432512
1123	ENSG00000128656	CHN1	chimerin 1	0.663812	1.77161e-07
2217	ENSG00000104870	FCGRT	Fc fragment of IgG receptor and transporter	-0.778752	1.78177e-07
80896	ENSG00000135838	NPL	N-acetylneuraminate pyruvate lyase	0.941207	1.78787e-07
1719	ENSG00000228716	DHFR	dihydrofolate reductase	0.389467	1.79733e-07	0.021764	-0.0333701	-0.00580308		0.484414
51135	ENSG00000198001	IRAK4	interleukin 1 receptor associated kinase 4	0.560579	1.80455e-07
92482	ENSG00000214413	BBIP1	BBSome interacting protein 1	0.631248	1.80633e-07
92342	ENSG00000171806	METTL18	methyltransferase like 18	0.731696	1.81632e-07
8477	ENSG00000140030	GPR65	G protein-coupled receptor 65	-1.58168	1.82246e-07
5627	ENSG00000184500	PROS1	protein S	0.581679	1.8252e-07					1.02639
801	ENSG00000198668	CALM1	calmodulin 1	-0.489784	1.83243e-07	-0.139347	-0.0659858	-0.102666										CALM1
3855	ENSG00000135480	KRT7	keratin 7	-0.672515	1.83954e-07					-1.39523
6751	ENSG00000139874	SSTR1	somatostatin receptor 1	-1.57069	1.84412e-07
503538	ENSG00000268895	A1BG-AS1	A1BG antisense RNA 1	-1.57248	1.85188e-07
10493	ENSG00000108828	VAT1	vesicle amine transport 1	0.337513	1.94191e-07	-0.166632	-0.123666	-0.145149		0.0298756								VAT1
2303	ENSG00000176692	FOXC2	forkhead box C2	-1.06279	1.94625e-07
132	ENSG00000156110	ADK	adenosine kinase	0.50642	1.94998e-07	0.494057	0.606562	0.550309		0.185068
80774	ENSG00000136490	LIMD2	LIM domain containing 2	-0.526472	1.94998e-07													LIMD2
388115	ENSG00000188549	CCDC9B	coiled-coil domain containing 9B	-0.459639	1.99184e-07
63931	ENSG00000120333	MRPS14	mitochondrial ribosomal protein S14	0.527668	2.03194e-07	-0.211882	-0.170181	-0.191032
92703	ENSG00000163444	TMEM183A	transmembrane protein 183A	0.446474	2.03709e-07
54955	ENSG00000116922	C1orf109	chromosome 1 open reading frame 109	-0.562701	2.05586e-07
5244	ENSG00000005471	ABCB4	ATP binding cassette subfamily B member 4	-0.865407	2.08532e-07
9672	ENSG00000162512	SDC3	syndecan 3	-0.569131	2.10392e-07										SDC3	Matrisome-associated	ECM-affiliated Proteins
718	ENSG00000125730	C3	complement C3	-1.03907	2.18353e-07	-2.50193	-1.9614	-2.23167	YES	-1.18379								C3
5097	ENSG00000156453	PCDH1	protocadherin 1	-1.55451	2.18527e-07
65108	ENSG00000175130	MARCKSL1	MARCKS like 1	-0.459103	2.1916e-07	-0.374973		-0.374973		-0.112347								MARCKSL1
51013	ENSG00000171311	EXOSC1	exosome component 1	0.664765	2.20541e-07					0.0371387
100192378	ENSG00000253661	ZFHX4-AS1	ZFHX4 antisense RNA 1	0.86452	2.21262e-07
5673	ENSG00000204941	PSG5	pregnancy specific beta-1-glycoprotein 5	1.43487	2.21684e-07
54707	ENSG00000142751	GPN2	GPN-loop GTPase 2	-0.563015	2.21684e-07
64411	ENSG00000120318	ARAP3	ArfGAP with RhoGAP domain, ankyrin repeat and PH domain 3	-0.603268	2.21992e-07
23641	ENSG00000182195	LDOC1	LDOC1, regulator of NFKB signaling	-0.688155	2.23423e-07
577	ENSG00000135298	ADGRB3	adhesion G protein-coupled receptor B3	-1.07567	2.23705e-07
150726	ENSG00000163013	FBXO41	F-box protein 41	-0.651278	2.24658e-07
115817	ENSG00000157379	DHRS1	dehydrogenase/reductase 1	-0.575315	2.26093e-07		-0.718526	-0.718526
6776	ENSG00000126561	STAT5A	signal transducer and activator of transcription 5A	-0.589998	2.31224e-07
9679	ENSG00000189319	FAM53B	family with sequence similarity 53 member B	0.518326	2.31224e-07
54809	ENSG00000205413	SAMD9	sterile alpha motif domain containing 9	-0.878916	2.31224e-07
11227	ENSG00000136542	GALNT5	polypeptide N-acetylgalactosaminyltransferase 5	-1.54694	2.31339e-07
387338	ENSG00000117481	NSUN4	NOP2/Sun RNA methyltransferase family member 4	-0.496072	2.31812e-07
5423	ENSG00000070501	POLB	DNA polymerase beta	0.630584	2.3182e-07
3678	ENSG00000161638	ITGA5	integrin subunit alpha 5	-0.547499	2.32734e-07	-0.220278	-0.00417776	-0.112228				-1.10078	-0.343678	-0.722227				ITGA5	ITGA5	ITGA5	ITGA5
92745	ENSG00000017483	SLC38A5	solute carrier family 38 member 5	-1.56611	2.36213e-07
79075	ENSG00000136982	DSCC1	DNA replication and sister chromatid cohesion 1	0.599911	2.37598e-07
90	ENSG00000115170	ACVR1	activin A receptor type 1	-0.529097	2.3803e-07
668	ENSG00000183770	FOXL2	forkhead box L2	-1.3172	2.44113e-07
57761	ENSG00000101255	TRIB3	tribbles pseudokinase 3	-0.431267	2.44168e-07
3998	ENSG00000074695	LMAN1	lectin, mannose binding 1	-0.369156	2.46709e-07	-0.313334	0.0123444	-0.150495							LMAN1	Matrisome-associated	ECM-affiliated Proteins
9464	ENSG00000164107	HAND2	heart and neural crest derivatives expressed 2	-1.56539	2.49748e-07
11037	ENSG00000243244	STON1	stonin 1	1.34432	2.49748e-07													STON1
1	ENSG00000121410	A1BG	alpha-1-B glycoprotein	-1.57151	2.50316e-07					0.89514
27291	ENSG00000166024	R3HCC1L	R3H domain and coiled-coil containing 1 like	0.511239	2.53145e-07
11313	ENSG00000011009	LYPLA2	lysophospholipase II	-0.557617	2.60459e-07	-0.154056	-0.100574	-0.127315
25936	ENSG00000117697	NSL1	NSL1, MIS12 kinetochore complex component	0.473744	2.64808e-07
4241	ENSG00000163975	MELTF	melanotransferrin	0.381725	2.64848e-07
3685	ENSG00000138448	ITGAV	integrin subunit alpha V	-0.581281	2.6593e-07	-0.171044	-0.28155	-0.226297			0.306197	-1.19554	-0.288012	-0.741774				ITGAV	ITGAV	ITGAV	ITGAV
27132	ENSG00000178773	CPNE7	copine 7	-0.77711	2.68685e-07
790	ENSG00000084774	CAD	carbamoyl-phosphate synthetase 2, aspartate transcarbamylase, and dihydroorotase	-0.589451	2.70659e-07	-0.749912	-0.632734	-0.691323	YES	-0.494349								CAD
3983	ENSG00000099204	ABLIM1	actin binding LIM protein 1	0.572077	2.71552e-07	1.1939	1.39813	1.29602	YES									ABLIM1
60312	ENSG00000196526	AFAP1	actin filament associated protein 1	-0.749511	2.73197e-07													AFAP1
1893	ENSG00000143369	ECM1	extracellular matrix protein 1	0.458274	2.73697e-07	0.131063		0.131063		0.759595					ECM1	Core matrisome	ECM Glycoproteins	ECM1
375444	ENSG00000172244	C5orf34	chromosome 5 open reading frame 34	0.656196	2.74071e-07
6385	ENSG00000124145	SDC4	syndecan 4	-0.649207	2.75786e-07	-1.10529	-0.403268	-0.754277		-0.747958	-0.209641				SDC4	Matrisome-associated	ECM-affiliated Proteins
2119	ENSG00000244405	ETV5	ETS variant 5	-0.639413	2.80809e-07
51703	ENSG00000197142	ACSL5	acyl-CoA synthetase long chain family member 5	-1.00366	2.82304e-07
9423	ENSG00000065320	NTN1	netrin 1	-0.986107	2.84165e-07						2.83554				NTN1	Core matrisome	ECM Glycoproteins	NTN1
5737	ENSG00000122420	PTGFR	prostaglandin F receptor	0.767687	2.88596e-07
81607	ENSG00000143217	NECTIN4	nectin cell adhesion molecule 4	1.39586	2.92547e-07
5433	ENSG00000144231	POLR2D	RNA polymerase II subunit D	-0.528531	2.99041e-07													POLR2D
23710	ENSG00000139112	GABARAPL1	GABA type A receptor associated protein like 1	0.548938	3.0176e-07
23172	ENSG00000165660	ABRAXAS2	abraxas 2, BRISC complex subunit	0.477053	3.03966e-07
5129	ENSG00000117266	CDK18	cyclin dependent kinase 18	-0.966214	3.04488e-07
115265	ENSG00000145358	DDIT4L	DNA damage inducible transcript 4 like	-1.55921	3.09119e-07
672	ENSG00000012048	BRCA1	BRCA1, DNA repair associated	0.491332	3.11123e-07
5366	ENSG00000141682	PMAIP1	phorbol-12-myristate-13-acetate-induced protein 1	-0.494386	3.22893e-07
22801	ENSG00000137809	ITGA11	integrin subunit alpha 11	-1.41784	3.32822e-07
8565	ENSG00000134684	YARS	tyrosyl-tRNA synthetase	-0.356798	3.41867e-07	-0.0821635	0.202539	0.0601876		-0.503446								YARS
79991	ENSG00000107960	STN1	STN1, CST complex subunit	0.557354	3.43032e-07
1364	ENSG00000189143	CLDN4	claudin 4	-0.657818	3.48287e-07
100287932	ENSG00000265354	TIMM23	translocase of inner mitochondrial membrane 23	0.58527	3.48328e-07
8528	ENSG00000203797	DDO	D-aspartate oxidase	-1.45483	3.48374e-07
1263	ENSG00000173846	PLK3	polo like kinase 3	-0.789609	3.5555e-07
7376	ENSG00000131408	NR1H2	nuclear receptor subfamily 1 group H member 2	0.386816	3.5555e-07						0.189788
10123	ENSG00000188042	ARL4C	ADP ribosylation factor like GTPase 4C	-0.378213	3.5555e-07
63877	ENSG00000165669	FAM204A	family with sequence similarity 204 member A	0.519605	3.5555e-07
57153	ENSG00000129353	SLC44A2	solute carrier family 44 member 2	0.412983	3.60545e-07		1.15232	1.15232
23207	ENSG00000116786	PLEKHM2	pleckstrin homology and RUN domain containing M2	-0.442479	3.65181e-07
144402	ENSG00000139117	CPNE8	copine 8	-0.670359	3.66752e-07
137814	ENSG00000180053	NKX2-6	NK2 homeobox 6	-1.51566	3.67358e-07
8027	ENSG00000136738	STAM	signal transducing adaptor molecule	0.510035	3.67502e-07		0.931398	0.931398		0.651089	0.373811
1739	ENSG00000075711	DLG1	discs large MAGUK scaffold protein 1	0.472001	3.69655e-07	0.325732	0.493297	0.409514		0.104035								DLG1
137392	ENSG00000188343	FAM92A	family with sequence similarity 92 member A	0.643478	3.89616e-07
728658	ENSG00000236552	RPL13AP5	ribosomal protein L13a pseudogene 5	0.628221	3.92616e-07
7410	ENSG00000160293	VAV2	vav guanine nucleotide exchange factor 2	-0.386447	3.92794e-07		0.371273	0.371273		0.140632								VAV2		VAV2	VAV2
1951	ENSG00000008300	CELSR3	cadherin EGF LAG seven-pass G-type receptor 3	-0.75579	3.9377e-07
389336	ENSG00000178776	C5orf46	chromosome 5 open reading frame 46	-1.51535	4.05699e-07
643911	ENSG00000245694	CRNDE	colorectal neoplasia differentially expressed	-1.5147	4.05699e-07
60370	ENSG00000119986	AVPI1	arginine vasopressin induced 1	0.755887	4.13132e-07
847	ENSG00000121691	CAT	catalase	0.573783	4.17146e-07	1.50131	1.84456	1.67294	YES	0.965805
1727	ENSG00000100243	CYB5R3	cytochrome b5 reductase 3	0.485062	4.17855e-07	0.848157	1.05236	0.950257										CYB5R3
6238	ENSG00000125844	RRBP1	ribosome binding protein 1	-0.61371	4.28931e-07	-0.684225	-0.430071	-0.557148		-0.0450128	-1.24001	0.244463	-0.414961	-0.0852488				RRBP1
57466	ENSG00000156304	SCAF4	SR-related CTD associated factor 4	-0.620747	4.28944e-07	-0.401559		-0.401559		0.789878
54498	ENSG00000088826	SMOX	spermine oxidase	-0.528646	4.32037e-07
1512	ENSG00000103811	CTSH	cathepsin H	0.761893	4.34342e-07					1.51064					CTSH	Matrisome-associated	ECM Regulators
6451	ENSG00000131171	SH3BGRL	SH3 domain binding glutamate rich protein like	0.502926	4.34824e-07	0.690998	0.938127	0.814563	YES	0.976411								SH3BGRL
2195	ENSG00000083857	FAT1	FAT atypical cadherin 1	-0.869027	4.37048e-07					-0.4522	-0.227334	-1.83378	-1.03895	-1.43637
3298	ENSG00000025156	HSF2	heat shock transcription factor 2	0.565099	4.45554e-07
3091	ENSG00000100644	HIF1A	hypoxia inducible factor 1 subunit alpha	-0.489109	4.46156e-07
9170	ENSG00000064547	LPAR2	lysophosphatidic acid receptor 2	-0.957468	4.53256e-07
26147	ENSG00000119403	PHF19	PHD finger protein 19	-0.408437	4.53916e-07
7832	ENSG00000159388	BTG2	BTG anti-proliferation factor 2	0.720937	4.55598e-07
109	ENSG00000138031	ADCY3	adenylate cyclase 3	-0.625637	4.61804e-07
57224	ENSG00000135540	NHSL1	NHS like 1	-0.916652	4.63904e-07													NHSL1
79813	ENSG00000181090	EHMT1	euchromatic histone lysine methyltransferase 1	-0.469721	4.63904e-07
4801	ENSG00000120837	NFYB	nuclear transcription factor Y subunit beta	0.433732	4.66646e-07
55668	ENSG00000089916	GPATCH2L	G-patch domain containing 2 like	-0.514856	4.70784e-07
3880	ENSG00000171345	KRT19	keratin 19	-0.534971	4.78378e-07													KRT19
439990	ENSG00000237523	LINC00857	long intergenic non-protein coding RNA 857	0.764129	4.82597e-07
274	ENSG00000136717	BIN1	bridging integrator 1	-0.492338	4.84522e-07	-0.408876		-0.408876		-0.565834
4088	ENSG00000166949	SMAD3	SMAD family member 3	-0.561671	4.98875e-07	-0.456682		-0.456682										SMAD3
11177	ENSG00000198604	BAZ1A	bromodomain adjacent to zinc finger domain 1A	-0.447898	5.01855e-07
90557	ENSG00000163040	CCDC74A	coiled-coil domain containing 74A	0.660902	5.03325e-07
84879	ENSG00000168389	MFSD2A	major facilitator superfamily domain containing 2A	-0.723204	5.06027e-07
8602	ENSG00000087269	NOP14	NOP14 nucleolar protein	-0.356987	5.16411e-07													NOP14
9144	ENSG00000108639	SYNGR2	synaptogyrin 2	-0.503458	5.16411e-07	-0.31423	-0.512884	-0.413557		-1.05084
55607	ENSG00000158528	PPP1R9A	protein phosphatase 1 regulatory subunit 9A	-0.903683	5.18839e-07
2135	ENSG00000162694	EXTL2	exostosin like glycosyltransferase 2	0.491492	5.22578e-07
65083	ENSG00000165271	NOL6	nucleolar protein 6	-0.44309	5.24735e-07
29953	ENSG00000072657	TRHDE	thyrotropin releasing hormone degrading enzyme	-1.09104	5.26544e-07
118429	ENSG00000163297	ANTXR2	ANTXR cell adhesion molecule 2	-0.465408	5.26544e-07
441518	ENSG00000212747	RTL8B	retrotransposon Gag like 8B	0.498838	5.26544e-07
29899	ENSG00000121957	GPSM2	G protein signaling modulator 2	0.424961	5.29338e-07
4615	ENSG00000172936	MYD88	MYD88, innate immune signal transduction adaptor	-0.512253	5.34564e-07													MYD88
2200	ENSG00000166147	FBN1	fibrillin 1	-1.11825	5.35751e-07	-0.21843	0.0442855	-0.0870725		-0.221092	1.01038				FBN1	Core matrisome	ECM Glycoproteins	FBN1
2275	ENSG00000183386	FHL3	four and a half LIM domains 3	-0.556455	5.35751e-07													FHL3	FHL3		FHL3
3714	ENSG00000184916	JAG2	jagged 2	-0.72228	5.36358e-07
26470	ENSG00000174938	SEZ6L2	seizure related 6 homolog like 2	-0.674868	5.38047e-07
754	ENSG00000183255	PTTG1IP	PTTG1 interacting protein	-0.381176	5.43164e-07
892	ENSG00000112237	CCNC	cyclin C	0.362572	5.48893e-07
64946	ENSG00000153044	CENPH	centromere protein H	0.561214	5.59224e-07
4642	ENSG00000176658	MYO1D	myosin ID	-0.489395	5.6778e-07													MYO1D
9184	ENSG00000154473	BUB3	BUB3, mitotic checkpoint protein	0.356201	5.69683e-07		0.0562812	0.0562812		-0.000144946								BUB3
80155	ENSG00000164134	NAA15	N(alpha)-acetyltransferase 15, NatA auxiliary subunit	-0.414207	5.70354e-07		-1.00014	-1.00014		-0.428156								NAA15
19	ENSG00000165029	ABCA1	ATP binding cassette subfamily A member 1	-0.730063	5.70883e-07
29099	ENSG00000110442	COMMD9	COMM domain containing 9	0.528973	5.78369e-07		0.683298	0.683298										COMMD9
2131	ENSG00000182197	EXT1	exostosin glycosyltransferase 1	-0.483328	5.79327e-07					-0.220287
51028	ENSG00000136100	VPS36	vacuolar protein sorting 36 homolog	0.39445	5.80812e-07													VPS36
1389	ENSG00000111269	CREBL2	cAMP responsive element binding protein like 2	0.437448	5.89764e-07
8092	ENSG00000180318	ALX1	ALX homeobox 1	0.844248	5.91088e-07
100128881	ENSG00000261373	VPS9D1-AS1	VPS9D1 antisense RNA 1	-1.05636	5.94411e-07
7503	ENSG00000229807	XIST	X inactive specific transcript	-1.4908	5.94573e-07
85016	ENSG00000137691	CFAP300	cilia and flagella associated protein 300	0.936717	5.96091e-07
142678	ENSG00000197530	MIB2	mindbomb E3 ubiquitin protein ligase 2	0.670034	5.96091e-07
79812	ENSG00000173269	MMRN2	multimerin 2	0.73597	6.04195e-07										MMRN2	Core matrisome	ECM Glycoproteins
81563	ENSG00000116667	C1orf21	chromosome 1 open reading frame 21	0.612336	6.04195e-07
1635	ENSG00000129187	DCTD	dCMP deaminase	-0.443046	6.52079e-07		-0.415867	-0.415867
1069	ENSG00000147400	CETN2	centrin 2	0.650874	6.66106e-07
4316	ENSG00000137673	MMP7	matrix metallopeptidase 7	-1.49915	6.69546e-07										MMP7	Matrisome-associated	ECM Regulators
255403	ENSG00000250312	ZNF718	zinc finger protein 718	-0.66198	6.7147e-07
92610	ENSG00000145365	TIFA	TRAF interacting protein with forkhead associated domain	-0.499515	6.72928e-07
80014	ENSG00000151718	WWC2	WW and C2 domain containing 2	-0.488812	6.76237e-07
784	ENSG00000167535	CACNB3	calcium voltage-gated channel auxiliary subunit beta 3	0.461448	6.87277e-07
8061	ENSG00000175592	FOSL1	FOS like 1, AP-1 transcription factor subunit	-0.469163	6.98323e-07
8187	ENSG00000196793	ZNF239	zinc finger protein 239	0.701813	7.11721e-07
387496	ENSG00000122035	RASL11A	RAS like family 11 member A	1.1757	7.41333e-07
9075	ENSG00000165376	CLDN2	claudin 2	-1.20829	7.72783e-07
65266	ENSG00000126562	WNK4	WNK lysine deficient protein kinase 4	-0.786615	7.78682e-07	-1.45526	-1.9746	-1.71493	YES
79961	ENSG00000162777	DENND2D	DENN domain containing 2D	-0.803097	7.95038e-07
144363	ENSG00000205707	ETFRF1	electron transfer flavoprotein regulatory factor 1	0.723541	7.96922e-07
9453	ENSG00000152904	GGPS1	geranylgeranyl diphosphate synthase 1	0.432043	8.16939e-07					0.0671988
100288152	ENSG00000225138	SLC9A3-AS1	SLC9A3 antisense RNA 1	0.926613	8.30588e-07
389136	ENSG00000206538	VGLL3	vestigial like family member 3	-0.82771	8.34592e-07
84318	ENSG00000120647	CCDC77	coiled-coil domain containing 77	0.603354	8.73099e-07
23405	ENSG00000100697	DICER1	dicer 1, ribonuclease III	-0.575468	8.75393e-07		-0.703809	-0.703809
26020	ENSG00000197324	LRP10	LDL receptor related protein 10	-0.544167	8.77659e-07	-0.268591		-0.268591
8888	ENSG00000160294	MCM3AP	minichromosome maintenance complex component 3 associated protein	-0.480907	8.81633e-07	-0.0317396		-0.0317396
79723	ENSG00000152455	SUV39H2	suppressor of variegation 3-9 homolog 2	0.606564	8.82818e-07
54881	ENSG00000136891	TEX10	testis expressed 10	-0.371935	8.83157e-07	-0.237728	0.0555463	-0.0910907
10443	ENSG00000244754	N4BP2L2	NEDD4 binding protein 2 like 2	0.416315	8.92628e-07
60681	ENSG00000141756	FKBP10	FK506 binding protein 10	-0.455939	9.02597e-07	-0.480136	-0.53665	-0.508393										FKBP10
4691	ENSG00000115053	NCL	nucleolin	-0.349631	9.37561e-07	-0.247748	-0.185232	-0.21649		-0.0280997	-1.09372	-0.066537	-0.629389	-0.347963				NCL
23089	ENSG00000242265	PEG10	paternally expressed 10	-0.525923	9.38302e-07
22933	ENSG00000068903	SIRT2	sirtuin 2	0.527187	9.44968e-07													SIRT2
54536	ENSG00000138190	EXOC6	exocyst complex component 6	0.526293	9.44968e-07
55220	ENSG00000162873	KLHDC8A	kelch domain containing 8A	-1.49545	9.56184e-07
118472	ENSG00000198546	ZNF511	zinc finger protein 511	0.5834	9.56184e-07
3070	ENSG00000119969	HELLS	helicase, lymphoid specific	0.390916	9.64253e-07													HELLS
4065	ENSG00000054219	LY75	lymphocyte antigen 75	-1.49982	9.65376e-07
2022	ENSG00000106991	ENG	endoglin	-0.511352	9.66876e-07
55662	ENSG00000166135	HIF1AN	hypoxia inducible factor 1 subunit alpha inhibitor	0.395019	9.73028e-07	0.422018	0.0759609	0.248989
515	ENSG00000116459	ATP5PB	ATP synthase peripheral stalk-membrane subunit b	0.575539	9.73671e-07
166614	ENSG00000170390	DCLK2	doublecortin like kinase 2	-0.610803	9.73805e-07
9044	ENSG00000095564	BTAF1	B-TFIID TATA-box binding protein associated factor 1	0.584128	9.9211e-07		0.387544	0.387544
5552	ENSG00000122862	SRGN	serglycin	-1.47313	9.95945e-07					-0.849091					SRGN	Core matrisome	Proteoglycans
57205	ENSG00000145246	ATP10D	ATPase phospholipid transporting 10D (putative)	-0.870439	1.00299e-06
3625	ENSG00000163083	INHBB	inhibin subunit beta B	1.18582	1.01161e-06										INHBB	Matrisome-associated	Secreted Factors
56975	ENSG00000177706	FAM20C	FAM20C, golgi associated secretory pathway kinase	-0.436632	1.01509e-06										FAM20C	Matrisome-associated	ECM Regulators
93185	ENSG00000162729	IGSF8	immunoglobulin superfamily member 8	-0.495222	1.01642e-06					0.530689								IGSF8
5976	ENSG00000005007	UPF1	UPF1, RNA helicase and ATPase	-0.3888	1.02156e-06	0.0779266	0.0423825	0.0601545										UPF1
5965	ENSG00000004700	RECQL	RecQ like helicase	0.417294	1.04099e-06	0.552082	0.923331	0.737707		0.741111
1445	ENSG00000103653	CSK	C-terminal Src kinase	-0.612976	1.05203e-06	0.135009	0.221489	0.178249		-0.52625								CSK	CSK	CSK	CSK
1954	ENSG00000105429	MEGF8	multiple EGF like domains 8	-0.599678	1.06751e-06										MEGF8	Matrisome-associated	Secreted Factors
57190	ENSG00000162430	SELENON	selenoprotein N	-0.619912	1.06751e-06
25758	ENSG00000110427	KIAA1549L	KIAA1549 like	-1.07773	1.08063e-06
28978	ENSG00000096092	TMEM14A	transmembrane protein 14A	0.624093	1.08408e-06
995	ENSG00000158402	CDC25C	cell division cycle 25C	0.532198	1.08732e-06
401138	ENSG00000187689	AMTN	amelotin	-1.4922	1.0926e-06
25874	ENSG00000143158	MPC2	mitochondrial pyruvate carrier 2	0.595505	1.10451e-06
55839	ENSG00000166451	CENPN	centromere protein N	0.460782	1.1362e-06
92689	ENSG00000197712	FAM114A1	family with sequence similarity 114 member A1	-0.432621	1.14397e-06	0.0394192	-0.161178	-0.0608795
154043	ENSG00000153721	CNKSR3	CNKSR family member 3	0.525021	1.15096e-06
55076	ENSG00000181458	TMEM45A	transmembrane protein 45A	-0.501691	1.16556e-06
117145	ENSG00000159445	THEM4	thioesterase superfamily member 4	0.501776	1.17815e-06
6397	ENSG00000129657	SEC14L1	SEC14 like lipid binding 1	-0.454524	1.19147e-06
5571	ENSG00000181929	PRKAG1	protein kinase AMP-activated non-catalytic subunit gamma 1	0.497797	1.19679e-06		0.788464	0.788464										PRKAG1
5939	ENSG00000076067	RBMS2	RNA binding motif single stranded interacting protein 2	-0.675734	1.19682e-06	0.46634		0.46634
6575	ENSG00000168575	SLC20A2	solute carrier family 20 member 2	-0.502138	1.19682e-06
273	ENSG00000078053	AMPH	amphiphysin	-1.15889	1.20237e-06
1948	ENSG00000125266	EFNB2	ephrin B2	-0.464968	1.20237e-06					0.791144
441376	ENSG00000205002	AARD	alanine and arginine rich domain containing protein	-1.48598	1.20617e-06
284443	ENSG00000196268	ZNF493	zinc finger protein 493	1.17855	1.214e-06
29089	ENSG00000077152	UBE2T	ubiquitin conjugating enzyme E2 T	0.608505	1.22026e-06					-0.254752
57446	ENSG00000101079	NDRG3	NDRG family member 3	0.409726	1.22026e-06	0.563939	0.697196	0.630567		0.74832
8723	ENSG00000114520	SNX4	sorting nexin 4	0.454592	1.28069e-06
529	ENSG00000131100	ATP6V1E1	ATPase H+ transporting V1 subunit E1	0.439043	1.2861e-06	0.409147	0.455317	0.432232			-0.525416							ATP6V1E1
114804	ENSG00000141576	RNF157	ring finger protein 157	0.540158	1.30079e-06
5214	ENSG00000067057	PFKP	phosphofructokinase, platelet	0.361556	1.30247e-06	0.531668	0.58208	0.556874		0.472764	-0.232828							PFKP
400043	ENSG00000250742	LINC02381	long intergenic non-protein coding RNA 2381	-0.909479	1.31769e-06
664	ENSG00000176171	BNIP3	BCL2 interacting protein 3	0.464578	1.3257e-06
9397	ENSG00000152465	NMT2	N-myristoyltransferase 2	0.436845	1.34828e-06		0.772357	0.772357
57480	ENSG00000120278	PLEKHG1	pleckstrin homology and RhoGEF domain containing G1	-1.44342	1.34927e-06
400745	ENSG00000189410	SH2D5	SH2 domain containing 5	-0.666513	1.35459e-06
79624	ENSG00000146476	ARMT1	acidic residue methyltransferase 1	0.352133	1.37456e-06					-0.0298267
7011	ENSG00000129566	TEP1	telomerase associated protein 1	-0.577772	1.37602e-06
23157	ENSG00000125354	38961	septin 6	0.390451	1.39956e-06
80255	ENSG00000115084	SLC35F5	solute carrier family 35 member F5	-0.468184	1.40312e-06
1947	ENSG00000090776	EFNB1	ephrin B1	-0.501888	1.40641e-06	0.318577	0.609222	0.4639
6480	ENSG00000073849	ST6GAL1	ST6 beta-galactoside alpha-2,6-sialyltransferase 1	-1.46659	1.41356e-06
55773	ENSG00000036054	TBC1D23	TBC1 domain family member 23	0.341132	1.42109e-06					0.242923
6119	ENSG00000106399	RPA3	replication protein A3	0.682886	1.42207e-06	0.0893626	0.195484	0.142423		0.0629658
100127983	ENSG00000253250	C8orf88	chromosome 8 open reading frame 88	0.536158	1.42602e-06
10827	ENSG00000055147	FAM114A2	family with sequence similarity 114 member A2	0.470651	1.42947e-06	0.0863762		0.0863762
3955	ENSG00000106003	LFNG	LFNG O-fucosylpeptide 3-beta-N-acetylglucosaminyltransferase	-0.453808	1.4306e-06					-0.816492
54206	ENSG00000116285	ERRFI1	ERBB receptor feedback inhibitor 1	-0.526596	1.4306e-06
2300	ENSG00000176678	FOXL1	forkhead box L1	-0.569823	1.44718e-06
9361	ENSG00000196365	LONP1	lon peptidase 1, mitochondrial	-0.315364	1.4576e-06	-0.541891	-0.317072	-0.429482		0.336705								LONP1
9215	ENSG00000133424	LARGE1	LARGE xylosyl- and glucuronyltransferase 1	1.24131	1.46402e-06
11282	ENSG00000161013	MGAT4B	alpha-1,3-mannosyl-glycoprotein 4-beta-N-acetylglucosaminyltransferase B	-0.316962	1.47084e-06					0.126268
118813	ENSG00000155256	ZFYVE27	zinc finger FYVE-type containing 27	0.499458	1.47334e-06
8728	ENSG00000135074	ADAM19	ADAM metallopeptidase domain 19	-0.717907	1.48375e-06					0.861156					ADAM19	Matrisome-associated	ECM Regulators
2995	ENSG00000136732	GYPC	glycophorin C (Gerbich blood group)	-0.642273	1.48993e-06
6640	ENSG00000101400	SNTA1	syntrophin alpha 1	0.461232	1.49047e-06
9562	ENSG00000107789	MINPP1	multiple inositol-polyphosphate phosphatase 1	0.37872	1.49047e-06	0.32262	0.342689	0.332655		1.01274
4149	ENSG00000125952	MAX	MYC associated factor X	-0.500632	1.49056e-06	-0.39443		-0.39443
5791	ENSG00000132334	PTPRE	protein tyrosine phosphatase, receptor type E	0.499683	1.49056e-06		1.38278	1.38278
4938	ENSG00000089127	OAS1	2'-5'-oligoadenylate synthetase 1	-1.31424	1.50235e-06
57180	ENSG00000133627	ACTR3B	ARP3 actin related protein 3 homolog B	0.625134	1.50258e-06
50848	ENSG00000158769	F11R	F11 receptor	-0.429979	1.50385e-06	0.0912598	0.0885462	0.089903		-0.835534
50628	ENSG00000179409	GEMIN4	gem nuclear organelle associated protein 4	-0.388564	1.5441e-06													GEMIN4
8496	ENSG00000110841	PPFIBP1	PPFIA binding protein 1	-0.620982	1.55375e-06	-0.0337763	0.241083	0.103653				-0.298424	0.0606008	-0.118911				PPFIBP1
133	ENSG00000148926	ADM	adrenomedullin	-0.86685	1.57229e-06													ADM
23136	ENSG00000082397	EPB41L3	erythrocyte membrane protein band 4.1 like 3	0.591889	1.57305e-06	0.457121	0.643969	0.550545		0.269079		0.768101	0.544683	0.656392				EPB41L3
166929	ENSG00000164023	SGMS2	sphingomyelin synthase 2	-0.497362	1.60652e-06
4124	ENSG00000112893	MAN2A1	mannosidase alpha class 2A member 1	-0.440173	1.62048e-06		-0.527271	-0.527271		-1.05013
8506	ENSG00000108797	CNTNAP1	contactin associated protein 1	-0.550436	1.62048e-06	-1.35152	0.256132	-0.547692
51308	ENSG00000132563	REEP2	receptor accessory protein 2	0.616127	1.62612e-06		1.46809	1.46809
196051	ENSG00000203805	PLPP4	phospholipid phosphatase 4	0.536115	1.62612e-06
55857	ENSG00000088970	KIZ	kizuna centrosomal protein	0.644752	1.62862e-06
54851	ENSG00000168876	ANKRD49	ankyrin repeat domain 49	0.554281	1.65078e-06
153478	ENSG00000153404	PLEKHG4B	pleckstrin homology and RhoGEF domain containing G4B	-0.507799	1.65078e-06
4259	ENSG00000143198	MGST3	microsomal glutathione S-transferase 3	0.575509	1.66165e-06		-1.67342	-1.67342
1965	ENSG00000134001	EIF2S1	eukaryotic translation initiation factor 2 subunit alpha	-0.410485	1.67213e-06		-0.321351	-0.321351		-0.309078	-0.819709							EIF2S1
394	ENSG00000100852	ARHGAP5	Rho GTPase activating protein 5	-0.513547	1.6859e-06		-0.450591	-0.450591
5810	ENSG00000113456	RAD1	RAD1 checkpoint DNA exonuclease	0.407589	1.70915e-06
100287314	ENSG00000235884	LINC00941	long intergenic non-protein coding RNA 941	-0.742597	1.7161e-06
4093	ENSG00000120693	SMAD9	SMAD family member 9	0.760004	1.72023e-06
6461	ENSG00000107338	SHB	SH2 domain containing adaptor protein B	-0.504145	1.72023e-06
7385	ENSG00000140740	UQCRC2	ubiquinol-cytochrome c reductase core protein 2	0.44665	1.72755e-06	-0.0524311	0.0124463	-0.0199924			-0.664631							UQCRC2
10491	ENSG00000170275	CRTAP	cartilage associated protein	0.349987	1.72769e-06	0.0880059	-0.116764	-0.0143791		-0.425807								CRTAP
10610	ENSG00000070731	ST6GALNAC2	ST6 N-acetylgalactosaminide alpha-2,6-sialyltransferase 2	1.18149	1.75311e-06
134359	ENSG00000152359	POC5	POC5 centriolar protein	0.527313	1.78092e-06
10775	ENSG00000105171	POP4	POP4 homolog, ribonuclease P/MRP subunit	0.535461	1.80546e-06
11201	ENSG00000101751	POLI	DNA polymerase iota	0.523753	1.81204e-06
23590	ENSG00000148459	PDSS1	decaprenyl diphosphate synthase subunit 1	0.681358	1.81204e-06
29914	ENSG00000120942	UBIAD1	UbiA prenyltransferase domain containing 1	-0.499802	1.8168e-06
9945	ENSG00000131459	GFPT2	glutamine-fructose-6-phosphate transaminase 2	-1.17866	1.81829e-06
191	ENSG00000101444	AHCY	adenosylhomocysteinase	0.42259	1.82583e-06	0.200002	0.282597	0.241299		0.102516	-0.872632	1.22412	0.620586	0.922351				AHCY
80013	ENSG00000148481	MINDY3	MINDY lysine 48 deubiquitinase 3	0.41486	1.83327e-06
84445	ENSG00000107816	LZTS2	leucine zipper tumor suppressor 2	0.357713	1.84228e-06
79098	ENSG00000182795	C1orf116	chromosome 1 open reading frame 116	-1.24653	1.86121e-06
90768	ENSG00000177822	TENM3-AS1	TENM3 antisense RNA 1	-0.540363	1.86237e-06
92370	ENSG00000155893	PXYLP1	2-phosphoxylose phosphatase 1	0.520363	1.87823e-06
10962	ENSG00000213190	MLLT11	MLLT11, transcription factor 7 cofactor	0.451049	1.88305e-06
23275	ENSG00000186866	POFUT2	protein O-fucosyltransferase 2	-0.423686	1.89019e-06
9638	ENSG00000149557	FEZ1	fasciculation and elongation protein zeta 1	-1.4606	1.89714e-06
64778	ENSG00000075420	FNDC3B	fibronectin type III domain containing 3B	-0.573856	1.90455e-06	-0.5425	-0.583808	-0.563154	YES
400451	ENSG00000185442	FAM174B	family with sequence similarity 174 member B	-1.3839	1.92921e-06
10848	ENSG00000104881	PPP1R13L	protein phosphatase 1 regulatory subunit 13 like	-0.590258	1.93471e-06	0.204015	0.219337	0.211676
3280	ENSG00000114315	HES1	hes family bHLH transcription factor 1	-0.778149	1.9392e-06
30844	ENSG00000103966	EHD4	EH domain containing 4	-0.436352	2.02385e-06	0.358059	0.274076	0.316067				-0.503247	0.208392	-0.147427				EHD4
2047	ENSG00000154928	EPHB1	EPH receptor B1	-0.626948	2.03657e-06
22821	ENSG00000185989	RASA3	RAS p21 protein activator 3	-0.447899	2.05757e-06													RASA3
9584	ENSG00000131051	RBM39	RNA binding motif protein 39	0.401051	2.06939e-06	0.0672257	-0.0110662	0.0280797		0.549427								RBM39
11112	ENSG00000106049	HIBADH	3-hydroxyisobutyrate dehydrogenase	0.458328	2.08465e-06	0.533065	0.594356	0.563711		0.726599
6507	ENSG00000079215	SLC1A3	solute carrier family 1 member 3	0.625276	2.0973e-06
29988	ENSG00000136856	SLC2A8	solute carrier family 2 member 8	-0.578398	2.11104e-06
8289	ENSG00000117713	ARID1A	AT-rich interaction domain 1A	-0.697151	2.11399e-06	-0.296385	0.242533	-0.0269262		0.158175
84552	ENSG00000178184	PARD6G	par-6 family cell polarity regulator gamma	0.95903	2.11399e-06
256764	ENSG00000166415	WDR72	WD repeat domain 72	-1.43297	2.11399e-06													WDR72
7358	ENSG00000109814	UGDH	UDP-glucose 6-dehydrogenase	-0.557118	2.15282e-06	-0.477884	-0.58246	-0.530172		-0.414001	-1.20552							UGDH
57460	ENSG00000111110	PPM1H	protein phosphatase, Mg2+/Mn2+ dependent 1H	-0.565362	2.16845e-06
84695	ENSG00000115318	LOXL3	lysyl oxidase like 3	-0.467473	2.17227e-06					-0.333228					LOXL3	Matrisome-associated	ECM Regulators
51306	ENSG00000031003	FAM13B	family with sequence similarity 13 member B	0.483072	2.18703e-06
158866	ENSG00000102383	ZDHHC15	zinc finger DHHC-type containing 15	-1.13434	2.18969e-06
58517	ENSG00000119707	RBM25	RNA binding motif protein 25	-0.427917	2.24777e-06	-0.273221	-0.0521376	-0.162679		-0.0514876								RBM25
90120	ENSG00000238227	TMEM250	transmembrane protein 250	-0.401495	2.24798e-06
10605	ENSG00000172239	PAIP1	poly(A) binding protein interacting protein 1	0.489215	2.30089e-06	0.252173		0.252173		0.375421								PAIP1
9985	ENSG00000100918	REC8	REC8 meiotic recombination protein	-1.00416	2.33386e-06
5983	ENSG00000133119	RFC3	replication factor C subunit 3	0.470363	2.36223e-06
657	ENSG00000107779	BMPR1A	bone morphogenetic protein receptor type 1A	0.445308	2.38326e-06
47	ENSG00000131473	ACLY	ATP citrate lyase	-0.33239	2.39881e-06	-1.22412	-1.37907	-1.30159		-0.313366		0.428469	0.0382957	0.233382				ACLY
153527	ENSG00000146007	ZMAT2	zinc finger matrin-type 2	0.373295	2.4275e-06
4919	ENSG00000185483	ROR1	receptor tyrosine kinase like orphan receptor 1	-0.557169	2.43548e-06
3309	ENSG00000044574	HSPA5	heat shock protein family A (Hsp70) member 5	-0.420198	2.4578e-06	-0.237541	-0.257976	-0.247758		0.0294049	-0.853589	-0.111298	-0.723611	-0.417454				HSPA5
8943	ENSG00000065000	AP3D1	adaptor related protein complex 3 subunit delta 1	-0.406876	2.47362e-06	0.054779	0.220732	0.137755		0.321069
11007	ENSG00000175602	CCDC85B	coiled-coil domain containing 85B	0.602911	2.47362e-06
23499	ENSG00000127603	MACF1	microtubule-actin crosslinking factor 1	-0.650312	2.50562e-06	-0.533409	-0.277152	-0.405281		-0.295665		-0.177344	-0.462873	-0.320108				MACF1		MACF1	MACF1
120	ENSG00000148700	ADD3	adducin 3	0.464189	2.50571e-06	-0.302635	-0.512277	-0.407456		0.19321
2583	ENSG00000135454	B4GALNT1	beta-1,4-N-acetyl-galactosaminyltransferase 1	0.985448	2.54185e-06
25793	ENSG00000100225	FBXO7	F-box protein 7	0.466759	2.54503e-06					-0.140921
8821	ENSG00000109452	INPP4B	inositol polyphosphate-4-phosphatase type II B	-0.686475	2.58587e-06
57142	ENSG00000115310	RTN4	reticulon 4	-0.418273	2.66237e-06	0.0596322	0.264166	0.161899		0.188943	-1.40327							RTN4
3814	ENSG00000170498	KISS1	KiSS-1 metastasis suppressor	-1.12256	2.68807e-06
100093631	ENSG00000233369	GTF2IP4	general transcription factor IIi pseudogene 4	0.588818	2.75738e-06
55734	ENSG00000020256	ZFP64	ZFP64 zinc finger protein	-0.399914	2.79656e-06
26229	ENSG00000149541	B3GAT3	beta-1,3-glucuronyltransferase 3	0.432121	2.8039e-06					0.0218054
10170	ENSG00000073737	DHRS9	dehydrogenase/reductase 9	1.39552	2.83714e-06
79866	ENSG00000136122	BORA	bora, aurora kinase A activator	0.483213	2.84172e-06
200081	ENSG00000084652	TXLNA	taxilin alpha	-0.671725	2.84543e-06	-0.507644	-0.479024	-0.493334		-0.846246								TXLNA
2635	ENSG00000117226	GBP3	guanylate binding protein 3	-0.5846	2.88093e-06
26985	ENSG00000185009	AP3M1	adaptor related protein complex 3 subunit mu 1	0.500098	2.88093e-06		0.346591	0.346591		0.425542								AP3M1
164091	ENSG00000182749	PAQR7	progestin and adipoQ receptor family member 7	-0.544766	2.88591e-06
51124	ENSG00000134049	IER3IP1	immediate early response 3 interacting protein 1	0.448691	2.9112e-06		0.637917	0.637917
84911	ENSG00000161298	ZNF382	zinc finger protein 382	-1.43236	2.91198e-06
22887	ENSG00000198815	FOXJ3	forkhead box J3	-0.49117	2.94076e-06
9538	ENSG00000149547	EI24	EI24, autophagy associated transmembrane protein	0.365619	2.95158e-06	0.39835	0.974858	0.686604
9712	ENSG00000148429	USP6NL	USP6 N-terminal like	0.496749	2.96968e-06	0.436908		0.436908										USP6NL
54532	ENSG00000145390	USP53	ubiquitin specific peptidase 53	-0.612599	2.97746e-06
51322	ENSG00000095787	WAC	WW domain containing adaptor with coiled-coil	0.509313	2.98786e-06
1349	ENSG00000131174	COX7B	cytochrome c oxidase subunit 7B	0.695528	3.02185e-06
116151	ENSG00000124098	FAM210B	family with sequence similarity 210 member B	0.55431	3.05163e-06		0.800098	0.800098
23094	ENSG00000105738	SIPA1L3	signal induced proliferation associated 1 like 3	-0.771203	3.11469e-06	0.389457		0.389457
64940	ENSG00000106610	STAG3L4	stromal antigen 3-like 4 (pseudogene)	0.661542	3.1667e-06
60313	ENSG00000159592	GPBP1L1	GC-rich promoter binding protein 1 like 1	-0.365238	3.22694e-06
55110	ENSG00000111196	MAGOHB	mago homolog B, exon junction complex subunit	0.569558	3.23205e-06	-0.0729379	-0.443076	-0.258007										MAGOHB
143686	ENSG00000149212	SESN3	sestrin 3	-1.15799	3.27676e-06
8796	ENSG00000136155	SCEL	sciellin	-1.37634	3.35196e-06
9235	ENSG00000008517	IL32	interleukin 32	-0.523091	3.40083e-06
2944	ENSG00000134184	GSTM1	glutathione S-transferase mu 1	-0.683457	3.40945e-06		0.218565	0.218565		-0.383847
3316	ENSG00000170276	HSPB2	heat shock protein family B (small) member 2	-0.930007	3.50117e-06
1871	ENSG00000112242	E2F3	E2F transcription factor 3	-0.425383	3.55728e-06
10985	ENSG00000089154	GCN1	GCN1, eIF2 alpha kinase activator homolog	-0.483635	3.55728e-06					-0.714482		0.33579	-0.22297	0.0564103
6230	ENSG00000118181	RPS25	ribosomal protein S25	0.694319	3.58603e-06	-0.211665	-0.318577	-0.265121		-0.570366	0.749308	-0.0535284	-0.381987	-0.217758				RPS25
285381	ENSG00000154813	DPH3	diphthamide biosynthesis 3	0.417398	3.63823e-06
9791	ENSG00000156471	PTDSS1	phosphatidylserine synthase 1	-0.374061	3.64509e-06
843	ENSG00000003400	CASP10	caspase 10	-0.8248	3.70234e-06
222166	ENSG00000180354	MTURN	maturin, neural progenitor differentiation regulator homolog	0.546164	3.73804e-06
60489	ENSG00000239713	APOBEC3G	apolipoprotein B mRNA editing enzyme catalytic subunit 3G	-1.10173	3.75753e-06
2710	ENSG00000198814	GK	glycerol kinase	0.580517	3.82722e-06
1488	ENSG00000175029	CTBP2	C-terminal binding protein 2	0.349855	3.88024e-06					0.599445
79947	ENSG00000117682	DHDDS	dehydrodolichyl diphosphate synthase subunit	-0.400318	3.88024e-06
3949	ENSG00000130164	LDLR	low density lipoprotein receptor	-0.738899	3.91877e-06					-0.639051
84216	ENSG00000139173	TMEM117	transmembrane protein 117	0.618854	3.95095e-06
55081	ENSG00000114446	IFT57	intraflagellar transport 57	0.495672	4.02204e-06
4232	ENSG00000106484	MEST	mesoderm specific transcript	0.632643	4.03545e-06		1.63514	1.63514
8761	ENSG00000090621	PABPC4	poly(A) binding protein cytoplasmic 4	-0.525171	4.05714e-06	-0.427809	-0.587077	-0.507443		-0.365569								PABPC4
340252	ENSG00000173041	ZNF680	zinc finger protein 680	0.691086	4.12102e-06
3454	ENSG00000142166	IFNAR1	interferon alpha and beta receptor subunit 1	-0.412843	4.12236e-06
9620	ENSG00000075275	CELSR1	cadherin EGF LAG seven-pass G-type receptor 1	-0.604663	4.12619e-06						1.10173
79971	ENSG00000116729	WLS	wntless Wnt ligand secretion mediator	-0.423367	4.15655e-06
10488	ENSG00000107175	CREB3	cAMP responsive element binding protein 3	-0.416113	4.21637e-06
51534	ENSG00000009844	VTA1	vesicle trafficking 1	0.424025	4.23893e-06	0.337197	0.56435	0.450774										VTA1
29959	ENSG00000115216	NRBP1	nuclear receptor binding protein 1	0.421193	4.25499e-06		0.481465	0.481465		-0.183572
343578	ENSG00000124143	ARHGAP40	Rho GTPase activating protein 40	-0.687421	4.29639e-06
3915	ENSG00000135862	LAMC1	laminin subunit gamma 1	-0.564721	4.298e-06	-0.352418	-0.225028	-0.288723		0.949453	-0.973399				LAMC1	Core matrisome	ECM Glycoproteins	LAMC1
79685	ENSG00000164576	SAP30L	SAP30 like	0.443475	4.30542e-06
57060	ENSG00000090097	PCBP4	poly(rC) binding protein 4	0.453241	4.31583e-06
84248	ENSG00000122068	FYTTD1	forty-two-three domain containing 1	0.381521	4.31642e-06													FYTTD1
130814	ENSG00000162976	PQLC3	PQ loop repeat containing 3	0.614723	4.31648e-06
5331	ENSG00000149782	PLCB3	phospholipase C beta 3	-0.421293	4.34533e-06	-0.806468	-0.471656	-0.639062
8318	ENSG00000093009	CDC45	cell division cycle 45	0.535954	4.36012e-06
199731	ENSG00000105767	CADM4	cell adhesion molecule 4	0.725718	4.38711e-06
50640	ENSG00000135241	PNPLA8	patatin like phospholipase domain containing 8	0.441857	4.40345e-06
57552	ENSG00000144959	NCEH1	neutral cholesterol ester hydrolase 1	-0.416696	4.46214e-06	0.205518	0.297857	0.251687
55466	ENSG00000140403	DNAJA4	DnaJ heat shock protein family (Hsp40) member A4	-1.4123	4.47682e-06
9762	ENSG00000088899	LZTS3	leucine zipper tumor suppressor family member 3	0.398822	4.55472e-06
10892	ENSG00000172175	MALT1	MALT1 paracaspase	-0.441007	4.5788e-06
2876	ENSG00000233276	GPX1	glutathione peroxidase 1	0.483144	4.64099e-06	0.69635	1.01266	0.854507			-0.825957
23169	ENSG00000116704	SLC35D1	solute carrier family 35 member D1	-0.622891	4.64399e-06
57509	ENSG00000129422	MTUS1	microtubule associated scaffold protein 1	0.703285	4.67792e-06
8467	ENSG00000153147	SMARCA5	SWI/SNF related, matrix associated, actin dependent regulator of chromatin, subfamily a, member 5	-0.343905	4.69057e-06		-0.163499	-0.163499		0.372375
1902	ENSG00000198121	LPAR1	lysophosphatidic acid receptor 1	-0.570036	4.74247e-06
9069	ENSG00000157224	CLDN12	claudin 12	-0.414137	4.75695e-06
9414	ENSG00000119139	TJP2	tight junction protein 2	-0.41205	4.86911e-06	-0.0446277	0.0503231	0.00284773		-0.423454		-0.366588	-0.502035	-0.434312				TJP2
348	ENSG00000130203	APOE	apolipoprotein E	-1.37823	4.87188e-06					-0.378069
51646	ENSG00000119801	YPEL5	yippee like 5	0.397813	4.87188e-06													YPEL5
221184	ENSG00000140848	CPNE2	copine 2	0.377319	4.91518e-06	0.307079	0.198527	0.252803
25828	ENSG00000100348	TXN2	thioredoxin 2	0.384952	4.92274e-06
86	ENSG00000136518	ACTL6A	actin like 6A	0.380206	5.03797e-06		-0.0927487	-0.0927487		0.285876								ACTL6A
29943	ENSG00000142623	PADI1	peptidyl arginine deiminase 1	-0.750219	5.05845e-06
53346	ENSG00000136404	TM6SF1	transmembrane 6 superfamily member 1	-1.1587	5.06583e-06
10745	ENSG00000116793	PHTF1	putative homeodomain transcription factor 1	0.432625	5.11791e-06
54503	ENSG00000177054	ZDHHC13	zinc finger DHHC-type containing 13	0.407503	5.12476e-06
56704	ENSG00000104369	JPH1	junctophilin 1	-0.942409	5.15371e-06
359845	ENSG00000183688	RFLNB	refilin B	-0.466278	5.1764e-06
55717	ENSG00000120008	WDR11	WD repeat domain 11	0.342534	5.21343e-06		0.254393	0.254393
157922	ENSG00000130559	CAMSAP1	calmodulin regulated spectrin associated protein 1	-0.516398	5.21343e-06	-0.167021		-0.167021
5420	ENSG00000128567	PODXL	podocalyxin like	-1.15338	5.2501e-06
64770	ENSG00000175455	CCDC14	coiled-coil domain containing 14	0.421904	5.2501e-06
1666	ENSG00000104325	DECR1	2,4-dienoyl-CoA reductase 1	0.520448	5.27939e-06	0.674461	0.645029	0.659745	YES	0.197889								DECR1
79660	ENSG00000173281	PPP1R3B	protein phosphatase 1 regulatory subunit 3B	-0.602148	5.29948e-06
9980	ENSG00000142197	DOP1B	DOP1 leucine zipper like protein B	-0.634063	5.31619e-06
10194	ENSG00000179981	TSHZ1	teashirt zinc finger homeobox 1	0.641999	5.31619e-06
55299	ENSG00000113460	BRIX1	BRX1, biogenesis of ribosomes	0.41667	5.32232e-06													BRIX1	BRIX1		BRIX1
55835	ENSG00000151849	CENPJ	centromere protein J	0.606696	5.45158e-06
10539	ENSG00000108010	GLRX3	glutaredoxin 3	0.545641	5.53401e-06		0.336992	0.336992		0.0284053								GLRX3
55610	ENSG00000004766	VPS50	VPS50, EARP/GARPII complex subunit	0.456999	5.53401e-06
2700	ENSG00000121743	GJA3	gap junction protein alpha 3	1.38009	5.54697e-06
5880	ENSG00000128340	RAC2	Rac family small GTPase 2	-0.478623	5.56124e-06	-0.911506	-1.05797	-0.984738
10778	ENSG00000257267	ZNF271P	zinc finger protein 271, pseudogene	0.449816	5.57656e-06
3633	ENSG00000204084	INPP5B	inositol polyphosphate-5-phosphatase B	-0.485401	5.57692e-06
26146	ENSG00000204104	TRAF3IP1	TRAF3 interacting protein 1	-0.540357	5.69731e-06
4299	ENSG00000172493	AFF1	AF4/FMR2 family member 1	-0.766982	5.80398e-06
93594	ENSG00000156787	TBC1D31	TBC1 domain family member 31	0.563031	5.92831e-06
83939	ENSG00000144895	EIF2A	eukaryotic translation initiation factor 2A	0.390217	5.93278e-06	-0.0974401	-0.0411028	-0.0692715		0.312957								EIF2A
6242	ENSG00000114993	RTKN	rhotekin	-0.50189	5.9852e-06
11057	ENSG00000140526	ABHD2	abhydrolase domain containing 2	-0.487213	6.15297e-06		0.613211	0.613211
25911	ENSG00000166171	DPCD	deleted in primary ciliary dyskinesia homolog (mouse)	0.760593	6.28306e-06
6767	ENSG00000100380	ST13	ST13, Hsp70 interacting protein	0.329581	6.35526e-06	0.2949	0.403008	0.348954		0.205744								ST13
51765	ENSG00000134602	STK26	serine/threonine kinase 26	0.431944	6.3622e-06
114822	ENSG00000158106	RHPN1	rhophilin Rho GTPase binding protein 1	-0.718166	6.37135e-06
9875	ENSG00000142207	URB1	URB1 ribosome biogenesis homolog	-0.591915	6.40614e-06		0.22754	0.22754
9420	ENSG00000172817	CYP7B1	cytochrome P450 family 7 subfamily B member 1	-1.38153	6.41335e-06
5599	ENSG00000107643	MAPK8	mitogen-activated protein kinase 8	0.384551	6.42593e-06
80115	ENSG00000128298	BAIAP2L2	BAI1 associated protein 2 like 2	-0.826481	6.43135e-06
114299	ENSG00000243444	PALM2	paralemmin 2	-1.29633	6.43135e-06
29781	ENSG00000025770	NCAPH2	non-SMC condensin II complex subunit H2	0.343987	6.45011e-06
54520	ENSG00000125633	CCDC93	coiled-coil domain containing 93	-0.486779	6.45173e-06	0.340391		0.340391
4499	ENSG00000205364	MT1M	metallothionein 1M	-1.31958	6.47657e-06
6001	ENSG00000148908	RGS10	regulator of G protein signaling 10	0.616451	6.5026e-06
728855	NA	LINC00623	long intergenic non-protein coding RNA 623	-0.749985	6.54743e-06
79134	ENSG00000226479	TMEM185B	transmembrane protein 185B	-0.420695	6.68763e-06
79627	ENSG00000119900	OGFRL1	opioid growth factor receptor like 1	-0.450493	6.7018e-06
84343	ENSG00000163755	HPS3	HPS3, biogenesis of lysosomal organelles complex 2 subunit 1	0.40012	6.71195e-06
3707	ENSG00000143772	ITPKB	inositol-trisphosphate 3-kinase B	-1.09988	6.72689e-06
9578	ENSG00000198752	CDC42BPB	CDC42 binding protein kinase beta	-0.487578	6.79576e-06	-0.629903	-0.0385767	-0.33424										CDC42BPB
22999	ENSG00000079841	RIMS1	regulating synaptic membrane exocytosis 1	-1.03682	6.8321e-06
6147	ENSG00000198242	RPL23A	ribosomal protein L23a	0.473196	6.87735e-06	-0.122366	-0.220701	-0.171534		-0.356832	0.0213333							RPL23A	RPL23A		RPL23A
3552	ENSG00000115008	IL1A	interleukin 1 alpha	-1.36177	6.88643e-06										IL1A	Matrisome-associated	Secreted Factors
51021	ENSG00000182180	MRPS16	mitochondrial ribosomal protein S16	0.379332	6.88643e-06	-0.182262	-0.209391	-0.195827										MRPS16
56978	ENSG00000152784	PRDM8	PR/SET domain 8	-0.936486	7.00783e-06
79781	ENSG00000132321	IQCA1	IQ motif containing with AAA domain 1	-1.33191	7.04395e-06
63905	ENSG00000101363	MANBAL	mannosidase beta like	0.439019	7.12747e-06
4605	ENSG00000101057	MYBL2	MYB proto-oncogene like 2	0.330471	7.16524e-06
5339	ENSG00000178209	PLEC	plectin	-0.720719	7.25169e-06	0.0255958	0.00913225	0.017364		0.156299	-0.924157	-0.344828	-0.39703	-0.370929				PLEC		PLEC	PLEC
10730	ENSG00000136758	YME1L1	YME1 like 1 ATPase	0.33802	7.29406e-06					-0.727251
84896	ENSG00000138138	ATAD1	ATPase family, AAA domain containing 1	0.379395	7.3232e-06
57221	ENSG00000112379	ARFGEF3	ARFGEF family member 3	-0.724448	7.51302e-06
282991	ENSG00000196072	BLOC1S2	biogenesis of lysosomal organelles complex 1 subunit 2	0.518535	7.54683e-06	0.180912	0.511629	0.34627
25	ENSG00000097007	ABL1	ABL proto-oncogene 1, non-receptor tyrosine kinase	-0.465843	7.57137e-06
22856	ENSG00000131873	CHSY1	chondroitin sulfate synthase 1	-0.431366	7.60351e-06
84679	ENSG00000065923	SLC9A7	solute carrier family 9 member A7	-0.852442	7.71745e-06
5610	ENSG00000055332	EIF2AK2	eukaryotic translation initiation factor 2 alpha kinase 2	-0.71734	7.74824e-06		-0.772308	-0.772308		-0.580446
79650	ENSG00000103005	USB1	U6 snRNA biogenesis phosphodiesterase 1	-0.361679	7.85641e-06
116372	ENSG00000150551	LYPD1	LY6/PLAUR domain containing 1	0.484464	7.85641e-06
10474	ENSG00000171148	TADA3	transcriptional adaptor 3	0.36716	7.90943e-06
5910	ENSG00000138698	RAP1GDS1	Rap1 GTPase-GDP dissociation stimulator 1	-0.355696	7.92562e-06		-0.201634	-0.201634		-0.312321								RAP1GDS1
10130	ENSG00000143870	PDIA6	protein disulfide isomerase family A member 6	-0.377325	7.92562e-06	-0.553109	-0.538836	-0.545972		0.119074								PDIA6
10379	ENSG00000213928	IRF9	interferon regulatory factor 9	-0.620356	8.05537e-06
401022	ENSG00000224189	HAGLR	HOXD antisense growth-associated long non-coding RNA	-0.851284	8.05537e-06
284273	ENSG00000180011	ZADH2	zinc binding alcohol dehydrogenase domain containing 2	0.402265	8.23103e-06
103695433	NA	LINC01322	long intergenic non-protein coding RNA 1322	-0.56177	8.23168e-06
23341	ENSG00000116138	DNAJC16	DnaJ heat shock protein family (Hsp40) member C16	-0.601066	8.23654e-06
65991	ENSG00000165775	FUNDC2	FUN14 domain containing 2	0.548253	8.40624e-06	0.327687	0.636347	0.482017
9666	ENSG00000198919	DZIP3	DAZ interacting zinc finger protein 3	0.501047	8.40842e-06
10644	ENSG00000073792	IGF2BP2	insulin like growth factor 2 mRNA binding protein 2	-0.485357	8.41686e-06	-0.0901578	-0.308594	-0.199376			-1.36888
283232	ENSG00000177042	TMEM80	transmembrane protein 80	0.719867	8.48066e-06
11213	ENSG00000090376	IRAK3	interleukin 1 receptor associated kinase 3	-1.22819	8.64144e-06
6304	ENSG00000182568	SATB1	SATB homeobox 1	0.987148	8.71305e-06
9709	ENSG00000051108	HERPUD1	homocysteine inducible ER protein with ubiquitin like domain 1	-0.462905	8.83229e-06
5203	ENSG00000101132	PFDN4	prefoldin subunit 4	0.552224	8.86864e-06	-0.100654	-0.153805	-0.12723		-0.31524
10052	ENSG00000182963	GJC1	gap junction protein gamma 1	-0.653002	8.89296e-06
84172	ENSG00000125630	POLR1B	RNA polymerase I subunit B	-0.428304	8.91925e-06
9145	ENSG00000100321	SYNGR1	synaptogyrin 1	0.490991	8.93768e-06	0.416732	0.188661	0.302696
79925	ENSG00000152582	SPEF2	sperm flagellar 2	0.755671	9.00617e-06
90293	ENSG00000003096	KLHL13	kelch like family member 13	-0.673591	9.00617e-06
59285	ENSG00000130433	CACNG6	calcium voltage-gated channel auxiliary subunit gamma 6	-1.03336	9.04155e-06
26273	ENSG00000110429	FBXO3	F-box protein 3	0.4376	9.1121e-06
7071	ENSG00000155090	KLF10	Kruppel like factor 10	-0.403098	9.1751e-06
6603	ENSG00000108604	SMARCD2	SWI/SNF related, matrix associated, actin dependent regulator of chromatin, subfamily d, member 2	0.407153	9.19092e-06	0.307662		0.307662										SMARCD2
9590	ENSG00000131016	AKAP12	A-kinase anchoring protein 12	-0.603027	9.27514e-06	-1.16754	-0.867976	-1.01776	YES	0.238394		0.20312	-0.0450295	0.0790452				AKAP12
64342	ENSG00000118960	HS1BP3	HCLS1 binding protein 3	0.53829	9.3445e-06
23266	ENSG00000117114	ADGRL2	adhesion G protein-coupled receptor L2	-0.912108	9.41822e-06
79665	ENSG00000108406	DHX40	DEAH-box helicase 40	0.398568	9.43379e-06													DHX40
4552	ENSG00000124275	MTRR	5-methyltetrahydrofolate-homocysteine methyltransferase reductase	0.438886	9.4846e-06
23232	ENSG00000108239	TBC1D12	TBC1 domain family member 12	0.506207	9.50283e-06
8435	ENSG00000167780	SOAT2	sterol O-acyltransferase 2	1.184	9.62595e-06
22911	ENSG00000085433	WDR47	WD repeat domain 47	0.466635	9.64363e-06
55916	ENSG00000101888	NXT2	nuclear transport factor 2 like export factor 2	0.500666	9.89672e-06
51804	ENSG00000100625	SIX4	SIX homeobox 4	-0.717221	9.9421e-06
3667	ENSG00000169047	IRS1	insulin receptor substrate 1	-0.608196	9.97422e-06													IRS1		IRS1	IRS1
3720	ENSG00000008083	JARID2	jumonji and AT-rich interaction domain containing 2	-0.475947	9.97509e-06
51029	ENSG00000121644	DESI2	desumoylating isopeptidase 2	0.378843	9.97509e-06
5530	ENSG00000138814	PPP3CA	protein phosphatase 3 catalytic subunit alpha	-0.433979	9.98806e-06	-0.0593145	0.0195798	-0.0198674		-0.158347								PPP3CA
57594	ENSG00000215271	HOMEZ	homeobox and leucine zipper encoding	-0.758845	1.00238e-05
23367	ENSG00000155506	LARP1	La ribonucleoprotein domain family member 1	-0.634152	1.0072e-05	-0.466178	-0.316841	-0.391509
84733	ENSG00000173894	CBX2	chromobox 2	-0.640957	1.01135e-05
644943	ENSG00000189431	RASSF10	Ras association domain family member 10	1.29432	1.01198e-05
79680	ENSG00000215012	RTL10	retrotransposon Gag like 10	-0.495094	1.0147e-05
10250	ENSG00000133226	SRRM1	serine and arginine repetitive matrix 1	-0.760737	1.01998e-05	-0.482412	-0.490057	-0.486234		0.0779037
7690	ENSG00000172262	ZNF131	zinc finger protein 131	0.433208	1.02808e-05
1645	ENSG00000187134	AKR1C1	aldo-keto reductase family 1 member C1	-1.3503	1.02966e-05													AKR1C1
5819	ENSG00000130202	NECTIN2	nectin cell adhesion molecule 2	-0.347895	1.03949e-05					-0.130631
5747	ENSG00000169398	PTK2	protein tyrosine kinase 2	-0.416908	1.04095e-05	-0.720921	-0.526369	-0.623645				-0.77602	-0.0127519	-0.394386				PTK2	PTK2	PTK2	PTK2
6652	ENSG00000140263	SORD	sorbitol dehydrogenase	-0.387277	1.04583e-05	-0.706017		-0.706017		-0.096638								SORD
9125	ENSG00000144580	CNOT9	CCR4-NOT transcription complex subunit 9	-0.305677	1.04743e-05
6747	ENSG00000114850	SSR3	signal sequence receptor subunit 3	-0.414613	1.04814e-05	-0.0971932	-0.0922074	-0.0947003
8904	ENSG00000214078	CPNE1	copine 1	0.35802	1.06557e-05	0.243303	0.356957	0.30013		0.611103		0.857312	0.631896	0.744604				CPNE1
4318	ENSG00000100985	MMP9	matrix metallopeptidase 9	-1.28057	1.06637e-05										MMP9	Matrisome-associated	ECM Regulators
79901	ENSG00000071967	CYBRD1	cytochrome b reductase 1	-0.378129	1.06637e-05
2356	ENSG00000136877	FPGS	folylpolyglutamate synthase	-0.365726	1.06668e-05
54494	ENSG00000180425	C11orf71	chromosome 11 open reading frame 71	0.806973	1.06753e-05
79870	ENSG00000164929	BAALC	BAALC, MAP3K1 and KLF4 binding	0.818212	1.07549e-05
162073	ENSG00000205730	ITPRIPL2	ITPRIP like 2	-0.645227	1.0779e-05
25898	ENSG00000163743	RCHY1	ring finger and CHY zinc finger domain containing 1	-0.417117	1.09078e-05
4141	ENSG00000166986	MARS	methionyl-tRNA synthetase	-0.358201	1.10117e-05	-0.260377	-0.272979	-0.266678		-0.0737914								MARS
8450	ENSG00000158290	CUL4B	cullin 4B	0.388846	1.11519e-05	0.497944	0.806544	0.652244		0.484462								CUL4B
64283	ENSG00000214944	ARHGEF28	Rho guanine nucleotide exchange factor 28	-0.577558	1.11519e-05
55737	ENSG00000069329	VPS35	VPS35, retromer complex component	0.326098	1.11942e-05	0.237686	0.398551	0.318118		0.251846		0.812486	0.221692	0.517089				VPS35
6320	ENSG00000105472	CLEC11A	C-type lectin domain containing 11A	-0.784874	1.12582e-05					-1.73685					CLEC11A	Matrisome-associated	ECM-affiliated Proteins
79705	ENSG00000154237	LRRK1	leucine rich repeat kinase 1	-0.649	1.13401e-05
27340	ENSG00000120800	UTP20	UTP20, small subunit processome component	-0.468215	1.13603e-05		-0.363451	-0.363451										UTP20
58190	ENSG00000144579	CTDSP1	CTD small phosphatase 1	-0.359412	1.13672e-05
79707	ENSG00000162408	NOL9	nucleolar protein 9	-0.645363	1.13741e-05		-0.0943712	-0.0943712
23385	ENSG00000162736	NCSTN	nicastrin	-0.337641	1.15002e-05		0.847258	0.847258
29954	ENSG00000009830	POMT2	protein O-mannosyltransferase 2	-0.458064	1.15272e-05
411	ENSG00000113273	ARSB	arylsulfatase B	-0.653891	1.16856e-05
83595	ENSG00000171056	SOX7	SRY-box 7	-1.1853	1.20086e-05
8650	ENSG00000133961	NUMB	NUMB, endocytic adaptor protein	-0.370623	1.20141e-05	0.00532812		0.00532812
23186	ENSG00000089902	RCOR1	REST corepressor 1	-0.478135	1.20296e-05					-0.267424
10410	ENSG00000142089	IFITM3	interferon induced transmembrane protein 3	-0.496493	1.22075e-05													IFITM3
55117	ENSG00000072041	SLC6A15	solute carrier family 6 member 15	-0.473419	1.22075e-05
5569	ENSG00000171033	PKIA	cAMP-dependent protein kinase inhibitor alpha	-0.447962	1.22492e-05
79807	ENSG00000138780	GSTCD	glutathione S-transferase C-terminal domain containing	-0.511196	1.22492e-05
2678	ENSG00000100031	GGT1	gamma-glutamyltransferase 1	-0.420098	1.25855e-05	0.206018	0.632607	0.419312
57198	ENSG00000143515	ATP8B2	ATPase phospholipid transporting 8B2	-0.517454	1.25978e-05
5018	ENSG00000155463	OXA1L	OXA1L, mitochondrial inner membrane protein	-0.382632	1.26264e-05	-0.256304		-0.256304
92345	ENSG00000145414	NAF1	nuclear assembly factor 1 ribonucleoprotein	-0.48514	1.2782e-05
6289	ENSG00000134339	SAA2	serum amyloid A2	-1.21708	1.28136e-05
51222	ENSG00000165804	ZNF219	zinc finger protein 219	-0.591329	1.2815e-05
23595	ENSG00000135336	ORC3	origin recognition complex subunit 3	0.426524	1.2899e-05
259230	ENSG00000198964	SGMS1	sphingomyelin synthase 1	0.474781	1.29729e-05
58499	ENSG00000148143	ZNF462	zinc finger protein 462	-0.807556	1.31227e-05
84419	ENSG00000166920	C15orf48	chromosome 15 open reading frame 48	-0.808331	1.31892e-05
55751	ENSG00000164168	TMEM184C	transmembrane protein 184C	-0.447176	1.32179e-05
51639	ENSG00000115128	SF3B6	splicing factor 3b subunit 6	0.508075	1.32366e-05
10785	ENSG00000160193	WDR4	WD repeat domain 4	-0.520429	1.32902e-05
11104	ENSG00000186625	KATNA1	katanin catalytic subunit A1	0.450355	1.32995e-05
10673	ENSG00000102524	TNFSF13B	TNF superfamily member 13b	-1.26481	1.33588e-05										TNFSF13B	Matrisome-associated	Secreted Factors
10726	ENSG00000090273	NUDC	nuclear distribution C, dynein complex regulator	-0.410372	1.34098e-05	-0.485438	-0.507617	-0.496528		-0.589989								NUDC
9124	ENSG00000107438	PDLIM1	PDZ and LIM domain 1	0.490033	1.34917e-05	1.17639	1.29431	1.23535		0.911196		0.696026	0.623586	0.659806				PDLIM1	PDLIM1		PDLIM1
163786	ENSG00000156876	SASS6	SAS-6 centriolar assembly protein	0.465548	1.35934e-05
100506365	ENSG00000253738	OTUD6B-AS1	OTUD6B antisense RNA 1 (head to head)	0.422937	1.37976e-05
2872	ENSG00000099875	MKNK2	MAP kinase interacting serine/threonine kinase 2	-0.441607	1.38637e-05
93487	ENSG00000168175	MAPK1IP1L	mitogen-activated protein kinase 1 interacting protein 1 like	-0.584866	1.38924e-05	0.166587	0.216284	0.191435
57462	ENSG00000164976	MYORG	myogenesis regulating glycosidase (putative)	-0.603803	1.39419e-05
79817	ENSG00000120162	MOB3B	MOB kinase activator 3B	-1.34464	1.39419e-05
36	ENSG00000196177	ACADSB	acyl-CoA dehydrogenase short/branched chain	0.578641	1.39676e-05
26030	ENSG00000126822	PLEKHG3	pleckstrin homology and RhoGEF domain containing G3	-0.436472	1.3981e-05	-1.14656	-1.34352	-1.24504
1025	ENSG00000136807	CDK9	cyclin dependent kinase 9	-0.447165	1.39828e-05
2920	ENSG00000081041	CXCL2	C-X-C motif chemokine ligand 2	-1.03012	1.39828e-05										CXCL2	Matrisome-associated	Secreted Factors
5361	ENSG00000114554	PLXNA1	plexin A1	-0.555932	1.39828e-05										PLXNA1	Matrisome-associated	ECM-affiliated Proteins
412	ENSG00000101846	STS	steroid sulfatase	-0.676224	1.40071e-05
7092	ENSG00000038295	TLL1	tolloid like 1	-0.642419	1.41241e-05										TLL1	Matrisome-associated	ECM Regulators
8490	ENSG00000143248	RGS5	regulator of G protein signaling 5	0.681492	1.41241e-05
163732	ENSG00000179862	CITED4	Cbp/p300 interacting transactivator with Glu/Asp rich carboxy-terminal domain 4	-1.17186	1.41241e-05
23204	ENSG00000170540	ARL6IP1	ADP ribosylation factor like GTPase 6 interacting protein 1	0.286938	1.43642e-05
23336	ENSG00000182253	SYNM	synemin	0.609278	1.43942e-05													SYNM		SYNM	SYNM
968	ENSG00000129226	CD68	CD68 molecule	0.419118	1.44083e-05
84914	ENSG00000198466	ZNF587	zinc finger protein 587	-0.737449	1.44163e-05
55975	ENSG00000122550	KLHL7	kelch like family member 7	0.371139	1.44269e-05
51506	ENSG00000143222	UFC1	ubiquitin-fold modifier conjugating enzyme 1	0.558628	1.44281e-05	0.110363	0.227371	0.168867
694	ENSG00000133639	BTG1	BTG anti-proliferation factor 1	-0.414656	1.44336e-05
1296	ENSG00000171812	COL8A2	collagen type VIII alpha 2 chain	-1.18428	1.44336e-05										COL8A2	Core matrisome	Collagens
6240	ENSG00000167325	RRM1	ribonucleotide reductase catalytic subunit M1	0.349461	1.44336e-05	0.441802	0.629836	0.535819		0.31965								RRM1
114926	ENSG00000176209	SMIM19	small integral membrane protein 19	0.603348	1.46267e-05
9563	ENSG00000049239	H6PD	hexose-6-phosphate dehydrogenase/glucose 1-dehydrogenase	-0.709138	1.47231e-05
84319	ENSG00000184220	CMSS1	cms1 ribosomal small subunit homolog	0.505334	1.48394e-05													CMSS1
348013	ENSG00000184497	TMEM255B	transmembrane protein 255B	-1.26381	1.49277e-05
9924	ENSG00000135473	PAN2	poly(A) specific ribonuclease subunit PAN2	0.53567	1.50027e-05
3675	ENSG00000005884	ITGA3	integrin subunit alpha 3	-0.485186	1.50134e-05	-0.728766	-0.316146	-0.522456		-0.539252		-0.731791	0.170694	-0.280549				ITGA3		ITGA3	ITGA3
58	ENSG00000143632	ACTA1	actin, alpha 1, skeletal muscle	-1.29177	1.50529e-05					-0.066558
57291	ENSG00000226950	DANCR	differentiation antagonizing non-protein coding RNA	0.641525	1.50663e-05
51098	ENSG00000101052	IFT52	intraflagellar transport 52	0.511656	1.51653e-05
196394	ENSG00000151743	AMN1	antagonist of mitotic exit network 1 homolog	0.747371	1.52825e-05
51752	ENSG00000164307	ERAP1	endoplasmic reticulum aminopeptidase 1	-0.457603	1.53517e-05		-0.457542	-0.457542		-0.416981
5359	ENSG00000188313	PLSCR1	phospholipid scramblase 1	-0.444156	1.53941e-05
648791	ENSG00000219607	PPP1R3G	protein phosphatase 1 regulatory subunit 3G	-1.30627	1.53941e-05
390963	NA	ZNF818P	zinc finger protein 818, pseudogene	1.32175	1.54063e-05
113802	ENSG00000162639	HENMT1	HEN methyltransferase 1	-1.14292	1.55025e-05
2802	ENSG00000090615	GOLGA3	golgin A3	-0.679444	1.56024e-05	-0.0925094	0.205896	0.0566934		-0.0382714
5289	ENSG00000078142	PIK3C3	phosphatidylinositol 3-kinase catalytic subunit type 3	0.460969	1.56024e-05
4037	ENSG00000130881	LRP3	LDL receptor related protein 3	0.960759	1.56555e-05
5874	ENSG00000041353	RAB27B	RAB27B, member RAS oncogene family	0.816491	1.59999e-05
5205	ENSG00000081923	ATP8B1	ATPase phospholipid transporting 8B1	-0.575207	1.60634e-05
6468	ENSG00000107829	FBXW4	F-box and WD repeat domain containing 4	0.367031	1.60634e-05
2744	ENSG00000115419	GLS	glutaminase	-0.362537	1.61964e-05	-0.457851	-0.722291	-0.590071		-0.372385		-0.998845	-1.36138	-1.18011				GLS
7247	ENSG00000211460	TSN	translin	-0.299619	1.62178e-05		-0.081476	-0.081476		-0.577035								TSN
54965	ENSG00000163964	PIGX	phosphatidylinositol glycan anchor biosynthesis class X	0.466349	1.62283e-05
646576	ENSG00000248890	HHIP-AS1	HHIP antisense RNA 1	-0.838165	1.63148e-05
6832	ENSG00000156502	SUPV3L1	Suv3 like RNA helicase	0.392512	1.65025e-05
79070	ENSG00000134901	KDELC1	KDEL motif containing 1	0.553486	1.65056e-05
92305	ENSG00000168936	TMEM129	transmembrane protein 129	-0.42454	1.65553e-05
55240	ENSG00000115107	STEAP3	STEAP3 metalloreductase	-0.549754	1.6653e-05
114787	ENSG00000169258	GPRIN1	G protein regulated inducer of neurite outgrowth 1	-0.429534	1.68564e-05
441478	ENSG00000198435	NRARP	NOTCH regulated ankyrin repeat protein	-1.29642	1.68565e-05
3872	ENSG00000128422	KRT17	keratin 17	-1.13961	1.6908e-05
55161	ENSG00000109133	TMEM33	transmembrane protein 33	-0.44191	1.69223e-05		-0.321697	-0.321697
50940	ENSG00000128655	PDE11A	phosphodiesterase 11A	-1.17187	1.7076e-05
79594	ENSG00000090432	MUL1	mitochondrial E3 ubiquitin protein ligase 1	-0.34843	1.72862e-05
84820	ENSG00000214783	POLR2J4	RNA polymerase II subunit J4, pseudogene	0.636499	1.736e-05
9086	ENSG00000198692	EIF1AY	eukaryotic translation initiation factor 1A Y-linked	0.492439	1.7384e-05
65055	ENSG00000068615	REEP1	receptor accessory protein 1	1.14831	1.7763e-05
122830	ENSG00000139977	NAA30	N(alpha)-acetyltransferase 30, NatC catalytic subunit	-0.476698	1.7763e-05
4983	ENSG00000079482	OPHN1	oligophrenin 1	-0.719686	1.78475e-05
113146	ENSG00000185567	AHNAK2	AHNAK nucleoprotein 2	-0.795933	1.80329e-05	-1.0661	-0.417704	-0.7419		-0.094697								AHNAK2
6513	ENSG00000117394	SLC2A1	solute carrier family 2 member 1	-0.340047	1.80338e-05	-0.294739	-0.19333	-0.244034			0.0751595							SLC2A1
90362	ENSG00000169122	FAM110B	family with sequence similarity 110 member B	-1.02247	1.80338e-05
84109	ENSG00000186867	QRFPR	pyroglutamylated RFamide peptide receptor	-1.17439	1.82143e-05
599	ENSG00000129473	BCL2L2	BCL2 like 2	-0.443013	1.83085e-05
7799	ENSG00000116731	PRDM2	PR/SET domain 2	-0.568317	1.84629e-05
25891	ENSG00000149090	PAMR1	peptidase domain containing associated with muscle regeneration 1	1.08246	1.89687e-05										PAMR1	Matrisome-associated	ECM Regulators	PAMR1
3014	ENSG00000188486	H2AFX	H2A histone family member X	0.324569	1.92789e-05	0.240375	0.188299	0.214337										H2AFX
8079	ENSG00000089693	MLF2	myeloid leukemia factor 2	0.349014	1.93193e-05	0.21313	0.0658836	0.139507
7701	ENSG00000115568	ZNF142	zinc finger protein 142	-0.627391	1.95189e-05
26586	ENSG00000136108	CKAP2	cytoskeleton associated protein 2	0.349788	1.96856e-05		0.976872	0.976872
283131	ENSG00000245532	NEAT1	nuclear paraspeckle assembly transcript 1	0.618729	1.98101e-05
246330	ENSG00000174516	PELI3	pellino E3 ubiquitin protein ligase family member 3	0.534814	2.0183e-05
100506621	NA	LINC01279	long intergenic non-protein coding RNA 1279	-0.72868	2.03501e-05
114794	ENSG00000166897	ELFN2	extracellular leucine rich repeat and fibronectin type III domain containing 2	0.514016	2.04995e-05										ELFN2	Matrisome-associated	ECM-affiliated Proteins
9026	ENSG00000130787	HIP1R	huntingtin interacting protein 1 related	0.341581	2.06925e-05	0.509341	0.525663	0.517502				0.163268	0.114767	0.139017				HIP1R
51313	ENSG00000164125	FAM198B	family with sequence similarity 198 member B	0.485947	2.09814e-05
51111	ENSG00000110066	KMT5B	lysine methyltransferase 5B	0.326757	2.1082e-05
6653	ENSG00000137642	SORL1	sortilin related receptor 1	0.831049	2.10893e-05
26091	ENSG00000148634	HERC4	HECT and RLD domain containing E3 ubiquitin protein ligase 4	0.377731	2.1238e-05					0.0465687
202	ENSG00000112297	CRYBG1	crystallin beta-gamma domain containing 1	-1.0165	2.12871e-05
51203	ENSG00000137804	NUSAP1	nucleolar and spindle associated protein 1	0.516388	2.12871e-05	0.296311		0.296311
200150	ENSG00000180287	PLD5	phospholipase D family member 5	-1.27644	2.14017e-05
8546	ENSG00000132842	AP3B1	adaptor related protein complex 3 subunit beta 1	0.375841	2.15109e-05	-0.351111	0.339181	-0.00596518		-0.21826
4521	ENSG00000106268	NUDT1	nudix hydrolase 1	0.669136	2.15288e-05		0.686824	0.686824		0.454659
154881	ENSG00000243335	KCTD7	potassium channel tetramerization domain containing 7	0.54787	2.16063e-05
23288	ENSG00000106012	IQCE	IQ motif containing E	0.4917	2.19657e-05
8804	ENSG00000143162	CREG1	cellular repressor of E1A stimulated genes 1	0.486116	2.21381e-05		1.14838	1.14838
84310	ENSG00000146540	C7orf50	chromosome 7 open reading frame 50	0.420713	2.22123e-05	0.339023	0.503425	0.421224
976	ENSG00000123146	ADGRE5	adhesion G protein-coupled receptor E5	-0.46046	2.23046e-05
51762	ENSG00000166128	RAB8B	RAB8B, member RAS oncogene family	-0.51242	2.27844e-05		-0.0100637	-0.0100637
375190	ENSG00000219626	FAM228B	family with sequence similarity 228 member B	0.814109	2.2794e-05
118487	ENSG00000172586	CHCHD1	coiled-coil-helix-coiled-coil-helix domain containing 1	0.731586	2.28364e-05
10060	ENSG00000069431	ABCC9	ATP binding cassette subfamily C member 9	-0.71858	2.28802e-05
10456	ENSG00000143575	HAX1	HCLS1 associated protein X-1	0.442535	2.28945e-05	-0.157077		-0.157077
50650	ENSG00000163947	ARHGEF3	Rho guanine nucleotide exchange factor 3	0.624101	2.29397e-05
7706	ENSG00000121060	TRIM25	tripartite motif containing 25	-0.355067	2.30389e-05	-0.615552	-0.745194	-0.680373										TRIM25
101928796	NA	LOC101928796	uncharacterized LOC101928796	-1.20843	2.30389e-05
10098	ENSG00000168785	TSPAN5	tetraspanin 5	-0.406331	2.3151e-05
10435	ENSG00000149798	CDC42EP2	CDC42 effector protein 2	-0.656316	2.33131e-05
10291	ENSG00000099995	SF3A1	splicing factor 3a subunit 1	-0.464883	2.33329e-05	-0.307823	-0.277628	-0.292725		-0.0595225
26191	ENSG00000134242	PTPN22	protein tyrosine phosphatase, non-receptor type 22	1.08911	2.35079e-05
2258	ENSG00000129682	FGF13	fibroblast growth factor 13	1.26694	2.35304e-05										FGF13	Matrisome-associated	Secreted Factors
2194	ENSG00000169710	FASN	fatty acid synthase	-0.497239	2.38297e-05	-0.335754	-0.368712	-0.352233		-0.231552		0.23652	-0.177588	0.0294662				FASN
8727	ENSG00000119326	CTNNAL1	catenin alpha like 1	0.328736	2.41831e-05
28981	ENSG00000122970	IFT81	intraflagellar transport 81	0.439595	2.42715e-05
8514	ENSG00000069424	KCNAB2	potassium voltage-gated channel subfamily A regulatory beta subunit 2	0.546653	2.43034e-05													KCNAB2
8548	ENSG00000117475	BLZF1	basic leucine zipper nuclear factor 1	0.359564	2.47706e-05
84536	ENSG00000183250	LINC01547	long intergenic non-protein coding RNA 1547	-0.826423	2.50869e-05
9053	ENSG00000135525	MAP7	microtubule associated protein 7	-0.711734	2.51754e-05
29956	ENSG00000143418	CERS2	ceramide synthase 2	0.310556	2.53887e-05		-0.372061	-0.372061
9654	ENSG00000135912	TTLL4	tubulin tyrosine ligase like 4	-0.546773	2.54851e-05
91663	ENSG00000179820	MYADM	myeloid associated differentiation marker	-0.718079	2.55681e-05	-0.210563	0.503487	0.146462			0.00556169	-0.908121	-0.478125	-0.693123				MYADM
2674	ENSG00000151892	GFRA1	GDNF family receptor alpha 1	-0.526752	2.55762e-05					-0.383006	0.756296
84868	ENSG00000135077	HAVCR2	hepatitis A virus cellular receptor 2	-0.747275	2.55762e-05
91373	ENSG00000197355	UAP1L1	UDP-N-acetylglucosamine pyrophosphorylase 1 like 1	-0.47134	2.56101e-05	-0.12551		-0.12551
8038	ENSG00000148848	ADAM12	ADAM metallopeptidase domain 12	0.566021	2.56233e-05					-0.327026					ADAM12	Matrisome-associated	ECM Regulators
79632	ENSG00000111879	FAM184A	family with sequence similarity 184 member A	-1.28204	2.58041e-05
122060	ENSG00000139737	SLAIN1	SLAIN motif family member 1	-1.26535	2.60512e-05
3326	ENSG00000096384	HSP90AB1	heat shock protein 90 alpha family class B member 1	-0.345799	2.60622e-05	-0.16469	-0.132379	-0.148535		-0.0718929	-1.28849	0.389187	0.0727232	0.230955
91316	ENSG00000228315	GUSBP11	glucuronidase, beta pseudogene 11	0.688951	2.6121e-05
90060	ENSG00000147144	CCDC120	coiled-coil domain containing 120	-0.504257	2.62013e-05
55166	ENSG00000031691	CENPQ	centromere protein Q	0.357873	2.62696e-05
5934	ENSG00000103479	RBL2	RB transcriptional corepressor like 2	0.359941	2.62953e-05
1738	ENSG00000091140	DLD	dihydrolipoamide dehydrogenase	0.382305	2.63673e-05	0.0920721	0.110293	0.101182		0.477651								DLD
8317	ENSG00000097046	CDC7	cell division cycle 7	0.456196	2.64088e-05
51626	ENSG00000138036	DYNC2LI1	dynein cytoplasmic 2 light intermediate chain 1	0.579349	2.64686e-05
3775	ENSG00000135750	KCNK1	potassium two pore domain channel subfamily K member 1	-1.2953	2.64974e-05
221662	ENSG00000112183	RBM24	RNA binding motif protein 24	0.549524	2.66273e-05
23203	ENSG00000165688	PMPCA	peptidase, mitochondrial processing alpha subunit	-0.456901	2.6714e-05	-0.243267	-0.363451	-0.303359		-0.301614
51122	ENSG00000114744	COMMD2	COMM domain containing 2	0.332404	2.6714e-05		0.626469	0.626469
50859	ENSG00000196104	SPOCK3	SPARC (osteonectin), cwcv and kazal like domains proteoglycan 3	-1.06434	2.67309e-05					0.561989					SPOCK3	Core matrisome	Proteoglycans
84515	ENSG00000125885	MCM8	minichromosome maintenance 8 homologous recombination repair factor	0.433434	2.67827e-05
8641	ENSG00000253953	PCDHGB4	protocadherin gamma subfamily B, 4	-0.742557	2.68543e-05
9721	ENSG00000204175	GPRIN2	G protein regulated inducer of neurite outgrowth 2	-0.694431	2.68543e-05
84299	ENSG00000141741	MIEN1	migration and invasion enhancer 1	0.557037	2.68543e-05	0.321351	0.138203	0.229777		0.174182
5794	ENSG00000080031	PTPRH	protein tyrosine phosphatase, receptor type H	-0.838974	2.70767e-05
25961	ENSG00000166321	NUDT13	nudix hydrolase 13	0.781106	2.72233e-05
3669	ENSG00000172183	ISG20	interferon stimulated exonuclease gene 20	-1.24115	2.75957e-05													ISG20
23603	ENSG00000110880	CORO1C	coronin 1C	-0.29097	2.76392e-05	0.701327	0.422791	0.562059		-0.126888		0.0557113	0.0150693	0.0353903				CORO1C
79035	ENSG00000139579	NABP2	nucleic acid binding protein 2	0.494009	2.76702e-05
22861	ENSG00000091592	NLRP1	NLR family pyrin domain containing 1	-0.725923	2.76857e-05
5998	ENSG00000138835	RGS3	regulator of G protein signaling 3	-0.38204	2.78305e-05
149111	ENSG00000143786	CNIH3	cornichon family AMPA receptor auxiliary protein 3	-0.526864	2.79464e-05
7275	ENSG00000166402	TUB	tubby bipartite transcription factor	0.730653	2.81202e-05
11262	ENSG00000079263	SP140	SP140 nuclear body protein	-1.29965	2.82277e-05
3185	ENSG00000169813	HNRNPF	heterogeneous nuclear ribonucleoprotein F	0.244517	2.8251e-05		-0.0377336	-0.0377336		0.216116		0.695582	0.00662118	0.351102				HNRNPF
9413	ENSG00000135063	FAM189A2	family with sequence similarity 189 member A2	-1.2984	2.86478e-05
123720	ENSG00000156232	WHAMM	WAS protein homolog associated with actin, golgi membranes and microtubules	-0.571532	2.88036e-05
84274	ENSG00000110871	COQ5	coenzyme Q5, methyltransferase	0.484057	2.90291e-05
5099	ENSG00000169851	PCDH7	protocadherin 7	-1.26141	2.91647e-05
29922	ENSG00000143156	NME7	NME/NM23 family member 7	0.544333	2.91726e-05
10608	ENSG00000123933	MXD4	MAX dimerization protein 4	0.380468	2.93108e-05
5577	ENSG00000005249	PRKAR2B	protein kinase cAMP-dependent type II regulatory subunit beta	0.632651	2.95632e-05													PRKAR2B
1676	ENSG00000160049	DFFA	DNA fragmentation factor subunit alpha	-0.392864	2.98389e-05					-0.552005
254295	ENSG00000175287	PHYHD1	phytanoyl-CoA dioxygenase domain containing 1	-0.669047	2.98468e-05
100874366	ENSG00000249641	HOXC13-AS	HOXC13 antisense RNA	1.28367	3.01943e-05
1047	ENSG00000153132	CLGN	calmegin	-0.391764	3.05011e-05
54020	ENSG00000160190	SLC37A1	solute carrier family 37 member 1	-0.840459	3.05011e-05
80727	ENSG00000136295	TTYH3	tweety family member 3	-0.474663	3.093e-05	0.0370307	1.66479	0.850911
11154	ENSG00000100478	AP4S1	adaptor related protein complex 4 subunit sigma 1	-0.644502	3.09988e-05
5606	ENSG00000034152	MAP2K3	mitogen-activated protein kinase kinase 3	-0.557436	3.10561e-05		-0.580049	-0.580049										MAP2K3
55319	ENSG00000198498	TMA16	translation machinery associated 16 homolog	-0.428566	3.12498e-05													TMA16
8614	ENSG00000113739	STC2	stanniocalcin 2	-0.387654	3.13663e-05					-0.750336
55068	ENSG00000120658	ENOX1	ecto-NOX disulfide-thiol exchanger 1	-1.25396	3.15583e-05
8520	ENSG00000128708	HAT1	histone acetyltransferase 1	0.378261	3.15802e-05		-0.332851	-0.332851		0.240835
9050	ENSG00000152229	PSTPIP2	proline-serine-threonine phosphatase interacting protein 2	0.6628	3.16299e-05	0.468635	0.15917	0.313903
6857	ENSG00000067715	SYT1	synaptotagmin 1	-1.14046	3.18312e-05
64084	ENSG00000158258	CLSTN2	calsyntenin 2	-1.18392	3.1849e-05					-1.41484
9459	ENSG00000129675	ARHGEF6	Rac/Cdc42 guanine nucleotide exchange factor 6	0.660205	3.19881e-05													ARHGEF6		ARHGEF6
28992	ENSG00000133315	MACROD1	MACRO domain containing 1	0.452229	3.29128e-05	1.02375		1.02375		-0.640568
100506311	ENSG00000233429	HOTAIRM1	HOXA transcript antisense RNA, myeloid-specific 1	0.694009	3.29672e-05
183	ENSG00000135744	AGT	angiotensinogen	0.819153	3.3079e-05										AGT	Matrisome-associated	ECM Regulators
79805	ENSG00000143494	VASH2	vasohibin 2	0.778974	3.37407e-05
112479	ENSG00000196678	ERI2	ERI1 exoribonuclease family member 2	0.49517	3.38169e-05
23492	ENSG00000100307	CBX7	chromobox 7	0.599417	3.39029e-05
93663	ENSG00000146376	ARHGAP18	Rho GTPase activating protein 18	-0.395568	3.41167e-05					0.085644
552889	ENSG00000253719	ATXN7L3B	ataxin 7 like 3B	-0.356495	3.41171e-05
8073	ENSG00000184007	PTP4A2	protein tyrosine phosphatase type IVA, member 2	-0.305192	3.41184e-05													PTP4A2
22954	ENSG00000119401	TRIM32	tripartite motif containing 32	-0.415087	3.41567e-05
6196	ENSG00000071242	RPS6KA2	ribosomal protein S6 kinase A2	-1.28741	3.42874e-05
23589	ENSG00000153048	CARHSP1	calcium regulated heat stable protein 1	0.358099	3.44912e-05	0.139339	0.43152	0.285429		-0.00171495
134145	ENSG00000150756	FAM173B	family with sequence similarity 173 member B	0.517605	3.46296e-05
92092	ENSG00000146858	ZC3HAV1L	zinc finger CCCH-type containing, antiviral 1 like	-0.881925	3.4764e-05	-0.539205	-0.599794	-0.569499	YES
5174	ENSG00000174827	PDZK1	PDZ domain containing 1	0.691361	3.47823e-05
122809	ENSG00000180008	SOCS4	suppressor of cytokine signaling 4	-0.41502	3.47823e-05
57409	ENSG00000125457	MIF4GD	MIF4G domain containing	0.46193	3.49695e-05		0.846973	0.846973
3978	ENSG00000105486	LIG1	DNA ligase 1	0.422195	3.53265e-05	0.22367	0.297236	0.260453		0.344913								LIG1
85451	ENSG00000132478	UNK	unkempt family zinc finger	0.381015	3.56064e-05
58472	ENSG00000137767	SQOR	sulfide quinone oxidoreductase	-0.512881	3.57414e-05
70	ENSG00000159251	ACTC1	actin, alpha, cardiac muscle 1	-1.2848	3.58053e-05	0.866552	-0.162339	0.352106				-0.740712	-0.505533	-0.623122
340348	ENSG00000158457	TSPAN33	tetraspanin 33	0.635992	3.59945e-05
9324	ENSG00000118418	HMGN3	high mobility group nucleosomal binding domain 3	0.513555	3.6095e-05
1183	ENSG00000073464	CLCN4	chloride voltage-gated channel 4	-0.732346	3.62095e-05
80017	ENSG00000133943	DGLUCY	D-glutamate cyclase	-0.675981	3.66833e-05
596	ENSG00000171791	BCL2	BCL2, apoptosis regulator	-1.05	3.7215e-05
80169	ENSG00000178971	CTC1	CST telomere replication complex component 1	-0.427231	3.73792e-05
84340	ENSG00000164347	GFM2	G elongation factor mitochondrial 2	0.361546	3.74386e-05
23310	ENSG00000151503	NCAPD3	non-SMC condensin II complex subunit D3	0.444399	3.76124e-05
5764	ENSG00000105894	PTN	pleiotrophin	0.51939	3.77346e-05					0.969017					PTN	Matrisome-associated	Secreted Factors
2736	ENSG00000074047	GLI2	GLI family zinc finger 2	-0.732996	3.78425e-05
5464	ENSG00000180817	PPA1	pyrophosphatase (inorganic) 1	0.4891	3.80857e-05	0.111833	0.14038	0.126106		0.0777984								PPA1
9404	ENSG00000110031	LPXN	leupaxin	-0.732452	3.81909e-05													LPXN		LPXN	LPXN
5218	ENSG00000058091	CDK14	cyclin dependent kinase 14	-0.487286	3.8243e-05
25963	ENSG00000103978	TMEM87A	transmembrane protein 87A	0.298146	3.83475e-05
6608	ENSG00000128602	SMO	smoothened, frizzled class receptor	0.416908	3.83987e-05
79080	ENSG00000110104	CCDC86	coiled-coil domain containing 86	-0.386121	3.83987e-05	0.124328		0.124328										CCDC86
9477	ENSG00000124641	MED20	mediator complex subunit 20	0.398141	3.90994e-05
196740	ENSG00000165633	VSTM4	V-set and transmembrane domain containing 4	0.46613	3.99303e-05
11336	ENSG00000180104	EXOC3	exocyst complex component 3	0.320149	4.03321e-05													EXOC3
57452	ENSG00000100626	GALNT16	polypeptide N-acetylgalactosaminyltransferase 16	1.24258	4.04404e-05
117178	ENSG00000117155	SSX2IP	SSX family member 2 interacting protein	0.338139	4.04642e-05
6237	ENSG00000126458	RRAS	RAS related	0.431094	4.05785e-05	0.273576	0.530281	0.401928
9049	ENSG00000110711	AIP	aryl hydrocarbon receptor interacting protein	0.480921	4.07014e-05	0.463413	0.413365	0.438389		0.531616								AIP
64417	ENSG00000151881	TMEM267	transmembrane protein 267	0.451213	4.0768e-05
22885	ENSG00000173210	ABLIM3	actin binding LIM protein family member 3	0.439866	4.09421e-05
55274	ENSG00000130024	PHF10	PHD finger protein 10	0.399514	4.09421e-05
114327	ENSG00000096093	EFHC1	EF-hand domain containing 1	0.534352	4.09421e-05
83986	ENSG00000167930	FAM234A	family with sequence similarity 234 member A	-0.306282	4.10549e-05
8189	ENSG00000125755	SYMPK	symplekin	-0.322188	4.12251e-05	-0.242926	0.0378286	-0.102548		0.248145								SYMPK
23466	ENSG00000183741	CBX6	chromobox 6	-0.594036	4.17957e-05
84080	ENSG00000124074	ENKD1	enkurin domain containing 1	0.510415	4.21038e-05
7316	ENSG00000150991	UBC	ubiquitin C	0.379184	4.23228e-05
23368	ENSG00000088808	PPP1R13B	protein phosphatase 1 regulatory subunit 13B	-0.56832	4.23228e-05
64855	ENSG00000136830	FAM129B	family with sequence similarity 129 member B	-0.276767	4.23228e-05	0.214	0.363716	0.288858		0.00109929								FAM129B
11214	ENSG00000170776	AKAP13	A-kinase anchoring protein 13	-0.64769	4.24739e-05	-0.388223	0.202273	-0.0929751
54461	ENSG00000159069	FBXW5	F-box and WD repeat domain containing 5	-0.311627	4.25845e-05
84002	ENSG00000176597	B3GNT5	UDP-GlcNAc:betaGal beta-1,3-N-acetylglucosaminyltransferase 5	-0.47379	4.31415e-05
7482	ENSG00000134245	WNT2B	Wnt family member 2B	-0.677351	4.34357e-05										WNT2B	Matrisome-associated	Secreted Factors
51622	ENSG00000122674	CCZ1	CCZ1 homolog, vacuolar protein trafficking and biogenesis associated	0.504036	4.35079e-05
11339	ENSG00000104147	OIP5	Opa interacting protein 5	0.516376	4.37043e-05
164312	ENSG00000125872	LRRN4	leucine rich repeat neuronal 4	-0.541577	4.38992e-05					-1.47124
124936	ENSG00000167740	CYB5D2	cytochrome b5 domain containing 2	0.442163	4.42394e-05
7408	ENSG00000125753	VASP	vasodilator stimulated phosphoprotein	-0.403235	4.44642e-05	-0.220261	-0.257976	-0.239119		-0.304919		-0.137504	0.168257	0.0153767				VASP	VASP	VASP	VASP
8994	ENSG00000144791	LIMD1	LIM domains containing 1	-0.610914	4.45841e-05	0.224658		0.224658										LIMD1	LIMD1		LIMD1
23184	ENSG00000117899	MESD	mesoderm development LRP chaperone	-0.409851	4.47015e-05
636	ENSG00000151746	BICD1	BICD cargo adaptor 1	-0.559152	4.55205e-05
4520	ENSG00000188786	MTF1	metal regulatory transcription factor 1	-0.510166	4.55961e-05
373156	ENSG00000197448	GSTK1	glutathione S-transferase kappa 1	0.439135	4.63281e-05	-0.0327871	-0.0720372	-0.0524121		-0.234205								GSTK1
9564	ENSG00000050820	BCAR1	BCAR1, Cas family scaffold protein	-0.334939	4.63768e-05	-0.0415359		-0.0415359										BCAR1		BCAR1	BCAR1
6778	ENSG00000166888	STAT6	signal transducer and activator of transcription 6	-0.35069	4.69798e-05	-1.03		-1.03										STAT6
51507	ENSG00000022277	RTF2	replication termination factor 2	0.438477	4.71659e-05
8504	ENSG00000034693	PEX3	peroxisomal biogenesis factor 3	0.452244	4.72288e-05
5524	ENSG00000119383	PTPA	protein phosphatase 2 phosphatase activator	0.3124	4.72977e-05					0.294148
7594	ENSG00000198521	ZNF43	zinc finger protein 43	1.03088	4.7317e-05
80351	ENSG00000107854	TNKS2	tankyrase 2	0.374957	4.73358e-05
7536	ENSG00000168066	SF1	splicing factor 1	-0.495386	4.73554e-05	-0.033791	0.130934	0.0485715		0.403541								SF1
55855	NA	FAM45BP	family with sequence similarity 45, member A pseudogene	0.748173	4.78031e-05
58488	ENSG00000141179	PCTP	phosphatidylcholine transfer protein	0.423181	4.78508e-05
64429	ENSG00000023041	ZDHHC6	zinc finger DHHC-type containing 6	0.414439	4.78508e-05
2770	ENSG00000127955	GNAI1	G protein subunit alpha i1	0.384342	4.81476e-05
5529	ENSG00000154001	PPP2R5E	protein phosphatase 2 regulatory subunit B'epsilon	-0.416972	4.83126e-05	-0.273884	-0.00389003	-0.138887
51248	ENSG00000120509	PDZD11	PDZ domain containing 11	0.511801	4.83126e-05					-0.639357
200197	ENSG00000175147	TMEM51-AS1	TMEM51 antisense RNA 1	-1.2628	4.84776e-05
858	ENSG00000105971	CAV2	caveolin 2	0.358921	4.85689e-05	-0.110106	-0.177089	-0.143597
56892	ENSG00000176907	TCIM	transcriptional and immune response regulator	-1.26494	4.85689e-05
7296	ENSG00000198431	TXNRD1	thioredoxin reductase 1	-0.28232	4.86826e-05	0.271545	0.727595	0.49957		-0.145143								TXNRD1
978	ENSG00000158825	CDA	cytidine deaminase	-0.57677	4.91517e-05													CDA
79883	ENSG00000132000	PODNL1	podocan like 1	0.863285	4.9467e-05										PODNL1	Core matrisome	Proteoglycans	PODNL1
261726	ENSG00000143155	TIPRL	TOR signaling pathway regulator	0.334967	4.9467e-05		0.0291463	0.0291463		-0.0825251								TIPRL
8303	ENSG00000184602	SNN	stannin	0.405458	4.95658e-05
119032	ENSG00000166275	BORCS7	BLOC-1 related complex subunit 7	0.718723	4.96874e-05
5525	ENSG00000066027	PPP2R5A	protein phosphatase 2 regulatory subunit B'alpha	0.413486	5.00223e-05													PPP2R5A
2316	ENSG00000196924	FLNA	filamin A	-0.570113	5.00946e-05	0.79859	0.960019	0.879305	YES	0.253119	-1.02401	-0.140255	0.0507455	-0.0447548				FLNA		FLNA	FLNA
6307	ENSG00000052802	MSMO1	methylsterol monooxygenase 1	-0.466088	5.06292e-05
6838	ENSG00000148296	SURF6	surfeit 6	-0.343554	5.06292e-05	0.0436245		0.0436245										SURF6
647024	ENSG00000188112	C6orf132	chromosome 6 open reading frame 132	-0.560311	5.10674e-05
150776	ENSG00000152117	LOC150776	sphingomyelin phosphodiesterase 4, neutral membrane (neutral sphingomyelinase-3) pseudogene	-0.419011	5.12418e-05
161823	ENSG00000168803	ADAL	adenosine deaminase like	0.409776	5.12745e-05
103	ENSG00000160710	ADAR	adenosine deaminase, RNA specific	-0.492606	5.20587e-05	-0.250131	-0.15043	-0.20028		0.169447
83479	ENSG00000118197	DDX59	DEAD-box helicase 59	0.504969	5.22319e-05
26061	ENSG00000131373	HACL1	2-hydroxyacyl-CoA lyase 1	0.399066	5.23667e-05
347404	ENSG00000147036	LANCL3	LanC like 3	-1.24088	5.25636e-05
199704	ENSG00000196967	ZNF585A	zinc finger protein 585A	0.643973	5.26613e-05
28998	ENSG00000172172	MRPL13	mitochondrial ribosomal protein L13	0.45351	5.26935e-05		-0.0177794	-0.0177794										MRPL13
55055	ENSG00000174442	ZWILCH	zwilch kinetochore protein	0.307622	5.27046e-05													ZWILCH
1906	ENSG00000078401	EDN1	endothelin 1	-0.682501	5.2986e-05
3199	ENSG00000105996	HOXA2	homeobox A2	0.784276	5.30567e-05
4857	ENSG00000139910	NOVA1	NOVA alternative splicing regulator 1	-1.23222	5.32396e-05
92154	ENSG00000132613	MTSS1L	MTSS1L, I-BAR domain containing	0.330988	5.33264e-05	0.177089		0.177089
4713	ENSG00000099795	NDUFB7	NADH:ubiquinone oxidoreductase subunit B7	0.473225	5.37957e-05	0.355693	0.232277	0.293985										NDUFB7
51319	ENSG00000174891	RSRC1	arginine and serine rich coiled-coil 1	0.412333	5.37996e-05
92935	ENSG00000247626	MARS2	methionyl-tRNA synthetase 2, mitochondrial	-0.654697	5.4026e-05
79786	ENSG00000135686	KLHL36	kelch like family member 36	-0.483115	5.41639e-05
2526	ENSG00000196371	FUT4	fucosyltransferase 4	-0.49723	5.49243e-05
93649	ENSG00000141052	MYOCD	myocardin	-1.17288	5.54344e-05
60485	ENSG00000151748	SAV1	salvador family WW domain containing protein 1	-0.401287	5.61455e-05
84883	ENSG00000042286	AIFM2	apoptosis inducing factor, mitochondria associated 2	0.446915	5.62514e-05
2202	ENSG00000115380	EFEMP1	EGF containing fibulin extracellular matrix protein 1	-0.506117	5.70216e-05					-0.222929					EFEMP1	Core matrisome	ECM Glycoproteins
6002	ENSG00000159788	RGS12	regulator of G protein signaling 12	0.316896	5.70216e-05
23621	ENSG00000186318	BACE1	beta-secretase 1	0.425339	5.70216e-05
613	ENSG00000186716	BCR	BCR, RhoGEF and GTPase activating protein	-0.509315	5.72055e-05
23612	ENSG00000174307	PHLDA3	pleckstrin homology like domain family A member 3	0.441255	5.72206e-05	0.800662	0.854388	0.827525										PHLDA3
137075	ENSG00000253958	CLDN23	claudin 23	-0.814232	5.76546e-05
84752	ENSG00000237172	B3GNT9	UDP-GlcNAc:betaGal beta-1,3-N-acetylglucosaminyltransferase 9	-1.19657	5.77276e-05
54507	ENSG00000143382	ADAMTSL4	ADAMTS like 4	0.693444	5.77665e-05						2.10322				ADAMTSL4	Matrisome-associated	ECM Regulators	ADAMTSL4
965	ENSG00000116815	CD58	CD58 molecule	0.488417	5.79579e-05
2959	ENSG00000137947	GTF2B	general transcription factor IIB	0.479236	5.80644e-05													GTF2B
5971	ENSG00000104856	RELB	RELB proto-oncogene, NF-kB subunit	-0.391837	5.82642e-05
8417	ENSG00000079950	STX7	syntaxin 7	0.353364	5.83771e-05	0.0993625	0.321225	0.210294
24139	ENSG00000125746	EML2	echinoderm microtubule associated protein like 2	-0.506921	5.83771e-05					-0.234686
6621	ENSG00000165684	SNAPC4	small nuclear RNA activating complex polypeptide 4	-0.455138	5.86029e-05
1601	ENSG00000153071	DAB2	DAB2, clathrin adaptor protein	0.441231	5.8651e-05	0.932364	1.15705	1.0447										DAB2
51734	ENSG00000198736	MSRB1	methionine sulfoxide reductase B1	0.392563	5.88417e-05
1649	ENSG00000175197	DDIT3	DNA damage inducible transcript 3	0.467646	5.90989e-05
1573	ENSG00000134716	CYP2J2	cytochrome P450 family 2 subfamily J member 2	-1.17283	5.92728e-05
1000	ENSG00000170558	CDH2	cadherin 2	-0.340238	6.01494e-05		0.509491	0.509491		0.049613								CDH2
794	ENSG00000172137	CALB2	calbindin 2	-1.24909	6.03536e-05
80313	ENSG00000148814	LRRC27	leucine rich repeat containing 27	0.767593	6.05738e-05
832	ENSG00000077549	CAPZB	capping actin protein of muscle Z-line subunit beta	-0.327888	6.10935e-05	-0.213939	-0.178492	-0.196215		-0.238021	-1.47208	-0.0597706	-0.155181	-0.107476				CAPZB
3382	ENSG00000003147	ICA1	islet cell autoantigen 1	-1.21205	6.12917e-05
23332	ENSG00000074054	CLASP1	cytoplasmic linker associated protein 1	-0.527477	6.22068e-05	-0.177882	0.13622	-0.0208308										CLASP1
9349	ENSG00000125691	RPL23	ribosomal protein L23	0.520598	6.26942e-05	-0.278566	-0.245374	-0.26197		-0.4368	0.0150235							RPL23
8536	ENSG00000134072	CAMK1	calcium/calmodulin dependent protein kinase I	0.504079	6.35836e-05
22913	ENSG00000125970	RALY	RALY heterogeneous nuclear ribonucleoprotein	0.405228	6.37022e-05		-0.62826	-0.62826		0.628529	-0.18831							RALY
22982	ENSG00000151240	DIP2C	disco interacting protein 2 homolog C	0.429856	6.37705e-05
220988	ENSG00000170144	HNRNPA3	heterogeneous nuclear ribonucleoprotein A3	-0.355482	6.37705e-05	-0.110075	-0.535754	-0.322915		-0.356157	-1.316							HNRNPA3
1173	ENSG00000161203	AP2M1	adaptor related protein complex 2 subunit mu 1	0.291108	6.41656e-05	0.00848689	0.224233	0.11636		0.383103								AP2M1
54585	ENSG00000163818	LZTFL1	leucine zipper transcription factor like 1	0.412325	6.48933e-05													LZTFL1
55684	ENSG00000196642	RABL6	RAB, member RAS oncogene family like 6	-0.284689	6.53094e-05	-0.987217	-0.746399	-0.866808		-0.28176
7353	ENSG00000070010	UFD1	ubiquitin recognition factor in ER associated degradation 1	0.443049	6.58816e-05					-0.0794704
83692	ENSG00000102181	CD99L2	CD99 molecule like 2	0.377935	6.58816e-05
51776	ENSG00000091436	MAP3K20	mitogen-activated protein kinase kinase kinase 20	-0.506028	6.59107e-05
8638	ENSG00000135114	OASL	2'-5'-oligoadenylate synthetase like	-1.16081	6.59242e-05
7019	ENSG00000108064	TFAM	transcription factor A, mitochondrial	0.328637	6.59709e-05	0.389457	0.617609	0.503533										TFAM
55701	ENSG00000165801	ARHGEF40	Rho guanine nucleotide exchange factor 40	-0.406419	6.62089e-05													ARHGEF40
11096	ENSG00000154736	ADAMTS5	ADAM metallopeptidase with thrombospondin type 1 motif 5	-0.454777	6.62971e-05					0.373595	1.40841				ADAMTS5	Matrisome-associated	ECM Regulators	ADAMTS5
1316	ENSG00000067082	KLF6	Kruppel like factor 6	-0.458237	6.6902e-05
10403	ENSG00000080986	NDC80	NDC80, kinetochore complex component	0.31934	6.77545e-05					0.237015
23580	ENSG00000179604	CDC42EP4	CDC42 effector protein 4	-0.329155	6.77978e-05	-0.956599		-0.956599
221710	ENSG00000224531	SMIM13	small integral membrane protein 13	-0.394169	6.78493e-05
22836	ENSG00000164292	RHOBTB3	Rho related BTB domain containing 3	0.323029	6.81606e-05
5111	ENSG00000132646	PCNA	proliferating cell nuclear antigen	0.425425	6.89149e-05	-0.123843	-0.0601858	-0.0920142		0.0770546	-1.2426							PCNA
16	ENSG00000090861	AARS	alanyl-tRNA synthetase	0.251033	6.91914e-05	0.0739573	0.240094	0.157026		0.4627								AARS
1627	ENSG00000113758	DBN1	drebrin 1	-0.28202	6.94798e-05					-0.178189	-1.90372	0.00626043	-0.377801	-0.18577				DBN1
401089	ENSG00000206262	FOXL2NB	FOXL2 neighbor	-1.18137	6.98241e-05
7327	ENSG00000184787	UBE2G2	ubiquitin conjugating enzyme E2 G2	-0.337223	6.99127e-05
2009	ENSG00000066629	EML1	echinoderm microtubule associated protein like 1	0.589495	7.03709e-05
6781	ENSG00000159167	STC1	stanniocalcin 1	-0.617259	7.16383e-05					0.385582
158158	ENSG00000165105	RASEF	RAS and EF-hand domain containing	-0.517451	7.22923e-05
54629	ENSG00000128923	MINDY2	MINDY lysine 48 deubiquitinase 2	-0.530137	7.27419e-05
27309	ENSG00000109445	ZNF330	zinc finger protein 330	-0.44644	7.32419e-05
4012	ENSG00000113441	LNPEP	leucyl and cystinyl aminopeptidase	-0.616931	7.36304e-05	1.75497	0.411195	1.08308
22919	ENSG00000101367	MAPRE1	microtubule associated protein RP/EB family member 1	0.315773	7.36667e-05	0.313826	0.331717	0.322772		0.310288								MAPRE1
9424	ENSG00000099337	KCNK6	potassium two pore domain channel subfamily K member 6	-0.595601	7.39733e-05
10732	ENSG00000101190	TCFL5	transcription factor like 5	0.373927	7.39858e-05
2673	ENSG00000198380	GFPT1	glutamine--fructose-6-phosphate transaminase 1	-0.445407	7.41681e-05	-0.650952	-0.617393	-0.634172		-0.127232								GFPT1
3670	ENSG00000016082	ISL1	ISL LIM homeobox 1	-1.00404	7.41688e-05
93099	ENSG00000161249	DMKN	dermokine	-0.544246	7.42168e-05
55744	ENSG00000106603	COA1	cytochrome c oxidase assembly factor 1 homolog	0.441969	7.47944e-05
5669	ENSG00000231924	PSG1	pregnancy specific beta-1-glycoprotein 1	1.12587	7.48965e-05
1894	ENSG00000114346	ECT2	epithelial cell transforming 2	0.306226	7.53171e-05
5565	ENSG00000131791	PRKAB2	protein kinase AMP-activated non-catalytic subunit beta 2	0.421199	7.54687e-05
7846	ENSG00000167552	TUBA1A	tubulin alpha 1a	0.358998	7.54687e-05	-0.00879836	-0.0130692	-0.0109338		0.0879307		0.277656	0.0606008	0.169129
57154	ENSG00000198742	SMURF1	SMAD specific E3 ubiquitin protein ligase 1	-0.416256	7.59755e-05
9766	ENSG00000100647	SUSD6	sushi domain containing 6	-0.683478	7.67528e-05
55304	ENSG00000172296	SPTLC3	serine palmitoyltransferase long chain base subunit 3	0.918401	7.67572e-05
121260	ENSG00000139370	SLC15A4	solute carrier family 15 member 4	-0.3431	7.68094e-05
170960	ENSG00000182903	ZNF721	zinc finger protein 721	-0.475393	7.68094e-05
8842	ENSG00000007062	PROM1	prominin 1	-1.14693	7.71469e-05
71	ENSG00000184009	ACTG1	actin gamma 1	-0.443438	7.77753e-05	-0.319676	-0.578601	-0.449138		0.403811		-0.186627	-0.0718912	-0.129259				ACTG1
7253	ENSG00000165409	TSHR	thyroid stimulating hormone receptor	1.22821	7.80574e-05
51616	ENSG00000187325	TAF9B	TATA-box binding protein associated factor 9b	0.349204	7.84488e-05
6711	ENSG00000115306	SPTBN1	spectrin beta, non-erythrocytic 1	-0.627722	7.8467e-05	-0.587273	-0.823342	-0.705307	YES	-0.191761	-1.49942	-0.415434	-0.746253	-0.580843				SPTBN1
241	ENSG00000132965	ALOX5AP	arachidonate 5-lipoxygenase activating protein	-0.907978	7.89521e-05
3763	ENSG00000157542	KCNJ6	potassium voltage-gated channel subfamily J member 6	-1.10478	7.89521e-05
253782	ENSG00000172292	CERS6	ceramide synthase 6	-0.450126	7.89521e-05
4174	ENSG00000100297	MCM5	minichromosome maintenance complex component 5	0.2839	7.964e-05		-0.0824301	-0.0824301		0.204496	-0.942683
91748	ENSG00000156030	ELMSAN1	ELM2 and Myb/SANT domain containing 1	-0.637174	7.97633e-05	-0.0372955		-0.0372955
10043	ENSG00000100284	TOM1	target of myb1 membrane trafficking protein	0.426647	8.01743e-05	0.571725	0.640366	0.606046										TOM1
5243	ENSG00000085563	ABCB1	ATP binding cassette subfamily B member 1	-0.585543	8.02999e-05
57658	ENSG00000012822	CALCOCO1	calcium binding and coiled-coil domain 1	0.446732	8.0493e-05
30815	ENSG00000160408	ST6GALNAC6	ST6 N-acetylgalactosaminide alpha-2,6-sialyltransferase 6	0.382395	8.08595e-05
388662	ENSG00000197106	SLC6A17	solute carrier family 6 member 17	-1.22929	8.13311e-05
91851	ENSG00000101938	CHRDL1	chordin like 1	0.47371	8.15291e-05					1.12397					CHRDL1	Matrisome-associated	Secreted Factors
6157	ENSG00000166441	RPL27A	ribosomal protein L27a	0.467348	8.20758e-05	-0.261829	-0.274053	-0.267941			-0.379357							RPL27A
55118	ENSG00000095713	CRTAC1	cartilage acidic protein 1	-0.657373	8.21065e-05
5430	ENSG00000181222	POLR2A	RNA polymerase II subunit A	-0.603209	8.24044e-05	-0.555799	-0.317767	-0.436783										POLR2A
55803	ENSG00000184060	ADAP2	ArfGAP with dual PH domains 2	-0.883042	8.24662e-05
4651	ENSG00000145555	MYO10	myosin X	-0.538228	8.32818e-05
8825	ENSG00000111052	LIN7A	lin-7 homolog A, crumbs cell polarity complex component	0.853864	8.35839e-05
8531	ENSG00000060138	YBX3	Y-box binding protein 3	-0.340201	8.36859e-05	0.647637	0.700005	0.673821		0.0908066	0.955153							YBX3
1545	ENSG00000138061	CYP1B1	cytochrome P450 family 1 subfamily B member 1	0.460292	8.41089e-05
84991	ENSG00000134453	RBM17	RNA binding motif protein 17	0.358138	8.48164e-05	0.161178		0.161178										RBM17
7068	ENSG00000151090	THRB	thyroid hormone receptor beta	0.483221	8.49588e-05
166378	ENSG00000145375	SPATA5	spermatogenesis associated 5	-0.587917	8.53695e-05
128989	ENSG00000183597	TANGO2	transport and golgi organization 2 homolog	0.583401	8.56617e-05
84333	ENSG00000180628	PCGF5	polycomb group ring finger 5	0.332052	8.56772e-05
58486	ENSG00000236287	ZBED5	zinc finger BED-type containing 5	0.333731	8.58148e-05
64781	ENSG00000100422	CERK	ceramide kinase	0.343593	8.61491e-05
9156	ENSG00000174371	EXO1	exonuclease 1	0.438031	8.63661e-05
51177	ENSG00000023902	PLEKHO1	pleckstrin homology domain containing O1	0.35356	8.63661e-05
3157	ENSG00000112972	HMGCS1	3-hydroxy-3-methylglutaryl-CoA synthase 1	0.279545	8.6588e-05					-0.680427
1032	ENSG00000129355	CDKN2D	cyclin dependent kinase inhibitor 2D	0.530862	8.66607e-05
25831	ENSG00000092148	HECTD1	HECT domain E3 ubiquitin protein ligase 1	-0.465185	8.68102e-05	0.0150693	0.0925248	0.053797										HECTD1
56255	ENSG00000125827	TMX4	thioredoxin related transmembrane protein 4	-0.377902	8.76511e-05		0.511074	0.511074
4685	ENSG00000154654	NCAM2	neural cell adhesion molecule 2	0.785374	8.76556e-05
221154	ENSG00000165487	MICU2	mitochondrial calcium uptake 2	0.388933	8.864e-05													MICU2
2029	ENSG00000143420	ENSA	endosulfine alpha	0.424403	8.89813e-05	0.397693	0.259426	0.32856
91612	ENSG00000258289	CHURC1	churchill domain containing 1	-0.332545	8.89813e-05					-0.76613
9321	ENSG00000100815	TRIP11	thyroid hormone receptor interactor 11	-0.435834	8.93867e-05
79794	ENSG00000111412	C12orf49	chromosome 12 open reading frame 49	-0.413739	8.95966e-05
10005	ENSG00000101473	ACOT8	acyl-CoA thioesterase 8	0.475024	9.00257e-05
4478	ENSG00000147065	MSN	moesin	-0.377994	9.01582e-05	-0.258839	-0.202888	-0.230864		0.0857763	-1.90964	0.369557	0.216362	0.292959				MSN		MSN	MSN
6827	ENSG00000213246	SUPT4H1	SPT4 homolog, DSIF elongation factor subunit	0.459034	9.09796e-05													SUPT4H1
255738	ENSG00000169174	PCSK9	proprotein convertase subtilisin/kexin type 9	-1.20412	9.09796e-05					-1.34969
55788	ENSG00000168216	LMBRD1	LMBR1 domain containing 1	0.38753	9.16455e-05
84866	ENSG00000149582	TMEM25	transmembrane protein 25	-0.530937	9.26327e-05
4176	ENSG00000166508	MCM7	minichromosome maintenance complex component 7	0.345029	9.26837e-05	-0.155389	-0.13014	-0.142765		0.367775
5933	ENSG00000080839	RBL1	RB transcriptional corepressor like 1	0.401104	9.29744e-05
3673	ENSG00000164171	ITGA2	integrin subunit alpha 2	-0.805388	9.42146e-05	-0.259167	-0.204015	-0.231591										ITGA2		ITGA2	ITGA2
10766	ENSG00000183864	TOB2	transducer of ERBB2, 2	-0.500645	9.42829e-05
79621	ENSG00000136104	RNASEH2B	ribonuclease H2 subunit B	0.452197	9.42829e-05													RNASEH2B
830	ENSG00000198898	CAPZA2	capping actin protein of muscle Z-line subunit alpha 2	0.391654	9.45669e-05		0.0381248	0.0381248		0.0600018	-0.687005							CAPZA2
201305	ENSG00000182557	SPNS3	sphingolipid transporter 3 (putative)	-0.816854	9.47305e-05
4330	ENSG00000169184	MN1	MN1 proto-oncogene, transcriptional regulator	0.660314	9.50888e-05
283392	ENSG00000236333	TRHDE-AS1	TRHDE antisense RNA 1	-0.966581	9.54341e-05
84288	ENSG00000203666	EFCAB2	EF-hand calcium binding domain 2	0.517256	9.55582e-05
147807	ENSG00000171443	ZNF524	zinc finger protein 524	0.51513	9.55582e-05
7477	ENSG00000188064	WNT7B	Wnt family member 7B	-0.582102	9.57507e-05						0.874367				WNT7B	Matrisome-associated	Secreted Factors
[truncated: 26,396 more rows]
