# Supplementary material for: A YAP/TAZ–ARHGAP29–RhoA Signaling Axis Regulates Podocyte Protrusions and Integrin Adhesions
Source: Cells. 2023 Jul 6;12(13):1795. doi: 10.3390/cells12131795 (PMC10340513; doi:10.3390/cells12131795)
Supplement: Supplementary file 1 [file cells-12-01795-s001.zip › Supplementary Table S4.xlsx]

## Sheet: TEADi RNAseq Analysis
GeneID	featureCounts on Ctrl. repl.-3: Counts	featureCounts on Ctrl. repl.-1: Counts	featureCounts on Ctrl. repl.-2: Counts	featureCounts on TEADi repl.-1: Counts	featureCounts on TEADi repl.-3: Counts	featureCounts on TEADi repl.-2: Counts	Base mean	DESeq2 log2 (FC) TEADi/Ctrl.	StdErr	Wald-Stats	P-value	P-adj	ENTREZID	ENSEMBL	SYMBOL	GENENAME	DESeq2 log2 (FC) EPB41L5 KO/WT	P-adj	Podocyte expressed (in vivo)1	higly podocyte specific eriched (in vivo)1		1.. Schell, C. et al. The FERM protein EPB41L5 regulates actomyosin contractility and focal adhesion formation to maintain the kidney filtration barrier. Proc Natl Acad Sci U S A 114, E4621-E4630 (2017).
4879	3046.8	2622.41	3010.25	282.726	328.949	266.879	1593	-3.15969	0.0826239	-38.2419	0	0	4879	ENSG00000120937	NPPB	natriuretic peptide B	-0.926922	0.00301219
25878	250.466	260.702	233.619	24.5422	14.9977	21.3503	134.28	-2.74902	0.167992	-16.364	3.459e-60	1.00299e-57	25878	ENSG00000101825	MXRA5	matrix remodeling associated 5	1.13191	0.000216082
5891	3314.61	2873.39	3384.26	547.782	551.914	541.231	1868.87	-2.46006	0.072514	-33.9253	2.82394e-252	1.5558e-248	5891	ENSG00000080823	MOK	MOK protein kinase	-0.540182	2.28265e-09
1901	1687.12	1492.16	1635.33	260.148	270.958	278.622	937.39	-2.45839	0.083395	-29.4788	5.3795e-191	1.27018e-187	1901	ENSG00000170989	S1PR1	sphingosine-1-phosphate receptor 1	0.0568646	0.680096
27063	8205.75	6208.28	7263.61	1253.62	1262.8	1315.18	4251.54	-2.41186	0.0752965	-32.0315	3.97574e-225	1.09518e-221	27063	ENSG00000148677	ANKRD1	ankyrin repeat domain 1	-0.556446	0.0353927	YES	YES
1906	2523.1	2163.34	2574.09	433.907	375.942	547.636	1436.34	-2.04135	0.148127	-13.7811	3.31224e-43	5.82391e-41	1906	ENSG00000078401	EDN1	endothelin 1	-0.682501	5.2986e-05
4883	2113.24	2034.61	2052.2	521.277	456.929	597.809	1296.01	-1.90183	0.0782735	-24.2972	2.0987e-130	2.16795e-127	4883	ENSG00000113389	NPR3	natriuretic peptide receptor 3	0.689734	2.24202e-10	YES	YES
100506621	1939.76	1724.52	1845.37	498.698	424.934	548.704	1163.67	-1.82334	0.0823249	-22.1481	1.08718e-108	8.55664e-106	100506621	NA	NA	NA	-0.72868	2.03501e-05
1591	2732.36	2564.11	2619.1	769.644	718.888	747.262	1691.89	-1.77916	0.0628006	-28.3304	1.46146e-176	3.01938e-173	1591	ENSG00000019186	CYP24A1	cytochrome P450 family 24 subfamily A member 1	0.0574201	0.665087
10053	203.843	192.693	217.544	31.414	54.9914	46.9707	124.576	-1.7537	0.162916	-10.7644	5.06827e-27	3.73966e-25	10053	ENSG00000129354	AP1M2	adaptor related protein complex 1 subunit mu 2	0.272349	0.142175
25849	219.022	266.37	264.696	67.7365	58.9908	75.7937	158.768	-1.59377	0.148115	-10.7603	5.29866e-27	3.89228e-25	25849	ENSG00000169116	PARM1	prostate androgen-regulated mucin-like protein 1	-0.110883	0.759419
130576	166.977	148.973	174.678	48.1028	34.9946	39.4981	102.204	-1.55977	0.167343	-9.32079	1.15478e-20	5.18648e-19	130576	ENSG00000150556	LYPD6B	LY6/PLAUR domain containing 6B	-0.887055	0.00618403	YES
7042	5211	4684.55	5013.16	1766.06	1584.75	1683.47	3323.83	-1.53295	0.0584427	-26.23	1.20971e-151	2.22156e-148	7042	ENSG00000092969	TGFB2	transforming growth factor beta 2	-0.11864	0.424753
23089	18968.2	17007.2	18523.4	6330.91	5823.09	6820.36	12245.5	-1.49149	0.0574907	-25.9432	2.17226e-148	3.59032e-145	23089	ENSG00000242265	PEG10	paternally expressed 10	-0.525923	9.38302e-07
374	941.146	812.064	790.875	249.349	283.956	318.12	565.918	-1.47812	0.100293	-14.738	3.67276e-49	7.78248e-47	374	ENSG00000109321	AREG	amphiregulin	-0.62727	0.00150047
3486	6123.95	6891.61	6308.78	2415.94	2238.65	2224.7	4367.27	-1.46118	0.0568047	-25.7229	6.48439e-146	9.74309e-143	3486	ENSG00000146674	IGFBP3	insulin like growth factor binding protein 3	0.254902	0.0213516
8076	223.36	220.221	226.117	74.6084	73.9885	57.6459	145.99	-1.43007	0.147765	-9.67801	3.73914e-22	1.93732e-20	8076	ENSG00000197614	MFAP5	microfibril associated protein 5	-0.374583	0.10279
2246	644.056	493.068	644.059	207.136	200.969	197.491	397.796	-1.41926	0.11417	-12.4311	1.77204e-35	2.09202e-33	2246	ENSG00000113578	FGF1	fibroblast growth factor 1	-0.492819	0.0525089	YES
101928370	81.3202	60.7226	77.1585	8.8352	20.9967	3.20255	42.0393	-1.41028	0.203578	-6.92744	4.28529e-12	8.47215e-11	101928370	NA	LOC101928370	uncharacterized LOC101928370	0.124684	0.705964
2254	96.5	99.5851	103.95	16.6887	25.996	30.958	62.2796	-1.39298	0.188025	-7.40848	1.27754e-13	3.05574e-12	2254	ENSG00000102678	FGF9	fibroblast growth factor 9	0.0497311	NA
151887	18804.5	17859.7	18540.5	7201.67	6930.92	7028.53	12727.6	-1.36859	0.0418077	-32.7354	4.90116e-235	1.62013e-231	151887	ENSG00000091986	CCDC80	coiled-coil domain containing 80	-0.300461	0.025668	YES
1404	4866.2	4047.37	4308.02	1746.42	1497.77	1733.65	3033.24	-1.36497	0.0710191	-19.2197	2.53189e-82	1.34991e-79	1404	ENSG00000145681	HAPLN1	hyaluronan and proteoglycan link protein 1	0.680653	3.50487e-18
285704	4701.39	4273.25	4220.14	1746.42	1696.74	1794.5	3072.07	-1.30626	0.0571284	-22.8654	1.02812e-115	9.44045e-113	285704	ENSG00000174136	RGMB	repulsive guidance molecule BMP co-receptor b	-1.07171	3.29606e-28	YES
6751	258.056	259.893	251.837	82.4619	93.9854	97.144	173.896	-1.29979	0.137072	-9.48254	2.48159e-21	1.19614e-19	6751	ENSG00000139874	SSTR1	somatostatin receptor 1	-1.57069	1.84412e-07
5010	4112.63	4117.8	4172.99	1639.42	1708.73	1621.56	2895.52	-1.29818	0.0513288	-25.2915	3.96477e-141	5.04075e-138	5010	ENSG00000013297	CLDN11	claudin 11	-2.80377	1.27422e-37
101926978	87.8258	59.913	61.0838	18.6521	17.9972	8.54013	42.3353	-1.26261	0.200944	-6.28337	3.3132e-10	5.23024e-09	101926978	ENSG00000254300	LINC01111	long intergenic non-protein coding RNA 1111	-0.0279642	0.909856
7482	396.843	368.384	367.574	145.29	144.977	141.98	260.841	-1.26179	0.117604	-10.7292	7.42538e-27	5.40646e-25	7482	ENSG00000134245	WNT2B	Wnt family member 2B	-0.677351	4.34357e-05
3763	60.7191	56.6745	58.9405	11.7803	14.9977	10.6752	35.6312	-1.26055	0.20149	-6.25615	3.94601e-10	6.147e-09	3763	ENSG00000157542	KCNJ6	potassium inwardly rectifying channel subfamily J member 6	-1.10478	7.89521e-05
83543	2504.66	2282.36	2522.65	992.488	970.849	1020.55	1715.59	-1.25958	0.0636455	-19.7906	3.5888e-87	2.11842e-84	83543	ENSG00000126878	AIF1L	allograft inflammatory factor 1 like	-0.0950637	0.429486	YES	YES
3885	191.916	138.448	152.174	25.5239	48.9924	69.3886	104.407	-1.25737	0.182814	-6.87788	6.07512e-12	1.18687e-10	3885	ENSG00000131737	KRT34	keratin 34	0.337253	0.353294
2615	94.3314	127.922	110.38	35.3408	38.9939	24.5529	71.9202	-1.25248	0.183293	-6.8332	8.30437e-12	1.59228e-10	2615	ENSG00000137507	LRRC32	leucine rich repeat containing 32	0.114792	0.764707	YES
8477	152.882	106.062	140.386	39.2676	27.9956	54.4433	86.8394	-1.2423	0.181429	-6.84727	7.52735e-12	1.45276e-10	8477	ENSG00000140030	GPR65	G protein-coupled receptor 65	-1.58168	1.82246e-07
90187	406.601	319.806	375.076	115.839	159.975	140.912	253.035	-1.23697	0.130709	-9.46355	2.97658e-21	1.41371e-19	90187	ENSG00000183798	EMILIN3	elastin microfibril interfacer 3	0.202267	0.616434
100507056	639.719	658.233	711.573	282.726	261.959	267.947	470.36	-1.22976	0.095469	-12.8812	5.74203e-38	7.97514e-36	100507056	NA	CCAT1	colon cancer associated transcript 1	NA	NA
207063	40.118	117.397	140.386	20.6155	20.9967	22.4178	60.3218	-1.2269	0.202695	-6.05293	1.42236e-09	2.07309e-08	207063	ENSG00000169084	DHRSX	dehydrogenase/reductase X-linked	0.12817	0.725568	YES
54463	1696.88	1625.75	1582.82	706.816	597.907	726.979	1156.19	-1.22648	0.0760897	-16.1188	1.88142e-58	5.18268e-56	54463	ENSG00000154153	RETREG1	reticulophagy regulator 1	-1.01517	1.70752e-07	YES	YES
387841	209.264	154.64	170.392	41.2309	70.989	68.3211	119.139	-1.22507	0.167732	-7.30374	2.7988e-13	6.3805e-12	387841	ENSG00000234498	RPL13AP20	ribosomal protein L13a pseudogene 20	-0.186483	0.646805
6356	57.4663	41.2914	48.2241	7.85351	10.9983	7.47262	28.8844	-1.22463	0.204374	-5.99209	2.07158e-09	2.96186e-08	6356	ENSG00000172156	CCL11	C-C motif chemokine ligand 11	-0.284509	NA
10886	193	167.594	158.604	65.7732	57.991	60.8484	117.302	-1.21722	0.157399	-7.73333	1.04766e-14	2.83401e-13	10886	ENSG00000056291	NPFFR2	neuropeptide FF receptor 2	0.546339	0.00542855
50617	255.888	233.985	216.472	80.4985	91.9857	95.009	162.306	-1.2042	0.141846	-8.48951	2.07519e-17	7.11592e-16	50617	ENSG00000105929	ATP6V0A4	ATPase H+ transporting V0 subunit a4	-0.192023	0.601386
400745	942.23	859.023	884.108	345.555	404.937	367.226	633.846	-1.2022	0.0878188	-13.6895	1.17267e-42	1.95777e-40	400745	ENSG00000189410	SH2D5	SH2 domain containing 5	-0.666513	1.35459e-06
6019	59.6348	59.913	50.3673	10.7986	13.9978	13.8777	34.7649	-1.20108	0.20186	-5.95009	2.67994e-09	3.77291e-08	6019	ENSG00000107014	RLN2	relaxin 2	0.143752	0.631702
130574	1069.09	1093.82	1083.43	454.522	447.93	471.842	770.106	-1.19506	0.0771243	-15.4952	3.73855e-54	8.95517e-52	130574	ENSG00000187123	LYPD6	LY6/PLAUR domain containing 6	-0.24572	0.14254	YES
4128	188.663	152.211	170.392	63.8098	63.99	57.6459	116.119	-1.18847	0.158015	-7.52126	5.42488e-14	1.35237e-12	4128	ENSG00000189221	MAOA	monoamine oxidase A	-0.115473	0.550559	YES
54798	310.101	315.758	268.983	139.4	105.984	103.549	207.296	-1.187	0.135417	-8.76552	1.85924e-18	7.14641e-17	54798	ENSG00000197410	DCHS2	dachsous cadherin-related 2	-0.23268	NA
22943	214.685	207.267	264.696	91.2971	91.9857	76.8612	157.799	-1.18216	0.146688	-8.05898	7.69326e-16	2.29935e-14	22943	ENSG00000107984	DKK1	dickkopf WNT signaling pathway inhibitor 1	-1.22745	2.06283e-09
7092	708.028	651.756	681.567	267.019	255.96	331.998	482.721	-1.17417	0.101157	-11.6074	3.77937e-31	3.58996e-29	7092	ENSG00000038295	TLL1	tolloid like 1	-0.642419	1.41241e-05
58538	223.36	187.026	221.831	74.6084	80.9874	85.4013	145.535	-1.17388	0.14732	-7.96821	1.60989e-15	4.70109e-14	58538	ENSG00000082126	MPP4	membrane palmitoylated protein 4	-0.742478	0.0249075
116362	472.741	439.632	451.163	178.667	222.965	157.992	320.527	-1.16562	0.117397	-9.92888	3.11741e-23	1.7466e-21	116362	ENSG00000162444	RBP7	retinol binding protein 7	-0.439422	0.00236179
1827	9608.8	8897.89	9240.8	4136.84	3909.39	4206.02	6666.62	-1.16218	0.0486807	-23.8735	5.77793e-126	5.61751e-123	1827	ENSG00000159200	RCAN1	regulator of calcineurin 1	0.134407	0.224615	YES	YES
85477	749.23	706.002	684.782	313.159	289.955	311.715	509.14	-1.16038	0.0919051	-12.6259	1.52006e-36	1.92762e-34	85477	ENSG00000006747	SCIN	scinderin	-0.189731	0.491142
54507	549.725	576.46	680.495	253.276	246.962	261.542	428.076	-1.15803	0.10427	-11.1061	1.17201e-28	9.58963e-27	54507	ENSG00000143382	ADAMTSL4	ADAMTS like 4	0.693444	5.77665e-05	YES	YES
3814	214.685	194.312	182.18	69.6999	86.9865	70.4561	136.387	-1.15338	0.150669	-7.65505	1.93244e-14	5.0537e-13	3814	ENSG00000170498	KISS1	KiSS-1 metastasis suppressor	-1.12256	2.68807e-06
8140	5292.32	5324.16	5635.78	2131.25	2482.61	2556.7	3903.8	-1.15277	0.0622864	-18.5076	1.79377e-76	8.01281e-74	8140	ENSG00000103257	SLC7A5	solute carrier family 7 member 5	-0.399125	0.0021944
171024	677.668	417.772	518.677	226.77	223.965	202.828	377.947	-1.15078	0.130089	-8.84615	9.05893e-19	3.53127e-17	171024	ENSG00000172403	SYNPO2	synaptopodin 2	-0.938501	0.00296358
64750	8527.78	8167.6	8114.5	3740.24	3691.43	3667.99	5984.92	-1.14615	0.0447461	-25.6145	1.05279e-144	1.45004e-141	64750	ENSG00000108854	SMURF2	SMAD specific E3 ubiquitin protein ligase 2	-0.661592	6.7553e-15	YES
196883	92.1629	82.5828	76.0868	33.3774	24.9961	16.0127	54.2031	-1.14607	0.193068	-5.93611	2.91862e-09	4.09152e-08	196883	ENSG00000129467	ADCY4	adenylate cyclase 4	-0.215864	NA
4803	916.208	926.222	1067.36	427.035	454.929	374.698	694.409	-1.14601	0.0910169	-12.5912	2.3597e-36	2.86773e-34	4803	ENSG00000134259	NGF	nerve growth factor	-0.00078961	0.997416
2012	1262.09	1131.87	1253.83	524.222	545.915	527.353	874.213	-1.14519	0.0772995	-14.815	1.17206e-49	2.54891e-47	2012	ENSG00000134531	EMP1	epithelial membrane protein 1	-0.281894	0.062269	YES
2250	5807.35	5048.88	5301.43	2312.86	2178.66	2657.05	3884.37	-1.14281	0.0682406	-16.7468	5.97601e-63	1.97543e-60	2250	ENSG00000138675	FGF5	fibroblast growth factor 5	-1.98439	9.81343e-132
91851	4079.02	4053.84	4193.35	1993.81	1678.74	1842.53	2973.55	-1.13408	0.0604777	-18.7521	1.86027e-78	8.78472e-76	91851	ENSG00000101938	CHRDL1	chordin like 1	0.47371	8.15291e-05
400798	98.6685	127.922	122.168	43.1943	28.9955	48.0382	78.1644	-1.13146	0.179864	-6.29065	3.16129e-10	5.01438e-09	400798	ENSG00000213057	C1orf220	chromosome 1 open reading frame 220	0.160829	0.688042
1301	3338.47	3266.88	3221.37	1553.03	1362.79	1515.87	2376.4	-1.12425	0.0592748	-18.9668	3.20816e-80	1.6068e-77	1301	ENSG00000060718	COL11A1	collagen type XI alpha 1 chain	-1.19329	6.13208e-26
114798	70.4775	55.0552	77.1585	17.6704	13.9978	24.5529	43.152	-1.11828	0.198837	-5.6241	1.86478e-08	2.32437e-07	114798	ENSG00000178235	SLITRK1	SLIT and NTRK like family member 1	-0.392918	0.277828
1734	72.6461	51.8166	58.9405	20.6155	15.9975	10.6752	38.4486	-1.1181	0.201214	-5.55679	2.74786e-08	3.33455e-07	1734	ENSG00000211448	DIO2	iodothyronine deiodinase 2	0.331878	0.355827
1272	146.376	141.686	168.248	58.9013	50.9921	65.1185	105.22	-1.10771	0.162406	-6.82059	9.0667e-12	1.73242e-10	1272	ENSG00000018236	CNTN1	contactin 1	-0.767014	0.002468
168667	106.258	113.349	107.165	43.1943	38.9939	35.228	74.0314	-1.10514	0.176478	-6.26221	3.79554e-10	5.93497e-09	168667	ENSG00000164619	BMPER	BMP binding endothelial regulator	0.0211237	0.954395
8676	354.556	279.324	265.768	122.711	141.978	106.752	211.848	-1.1039	0.138377	-7.97745	1.49385e-15	4.36998e-14	8676	ENSG00000135604	STX11	syntaxin 11	0.33548	0.0139288	YES	YES
4885	39.0337	51.007	42.8658	5.89013	9.99845	11.7427	26.7563	-1.10338	0.204618	-5.39239	6.9527e-08	7.88704e-07	4885	ENSG00000106236	NPTX2	neuronal pentraxin 2	NA	NA
1844	97.5843	106.062	105.021	34.3591	40.9936	34.1605	69.6968	-1.10144	0.179182	-6.14703	7.89448e-10	1.18081e-08	1844	ENSG00000158050	DUSP2	dual specificity phosphatase 2	0.445191	0.134761
653567	58.5506	54.2455	36.436	11.7803	11.9981	10.6752	30.6143	-1.09965	0.203961	-5.3915	6.98725e-08	7.91537e-07	653567	ENSG00000148483	TMEM236	transmembrane protein 236	0.13276	0.754401
53405	40.118	33.195	38.5792	5.89013	5.99907	7.47262	21.8757	-1.09646	0.204316	-5.36649	8.0283e-08	8.98386e-07	53405	ENSG00000112782	CLIC5	chloride intracellular channel 5	-0.112018	0.74912	YES	YES
273	273.236	213.744	259.338	111.913	113.982	76.8612	174.846	-1.09436	0.147443	-7.42228	1.15119e-13	2.75752e-12	273	ENSG00000078053	AMPH	amphiphysin	-1.15889	1.20237e-06	YES
316	1963.61	1786.05	1895.74	866.831	805.875	911.659	1371.63	-1.09395	0.0687326	-15.916	4.9062e-57	1.3079e-54	316	ENSG00000138356	AOX1	aldehyde oxidase 1	-0.34417	0.0342381
54443	4716.57	4219.82	4567.35	2219.6	1871.71	2119.02	3285.68	-1.09173	0.0642191	-17.0001	8.20053e-65	2.88379e-62	54443	ENSG00000011426	ANLN	anillin actin binding protein	0.288794	0.0110622
1490	36889	33337.5	35896.9	15793.4	15723.6	17674.9	25885.9	-1.09028	0.053043	-20.5547	6.9856e-94	4.4407e-91	1490	ENSG00000118523	CCN2	cellular communication network factor 2	#N/A	#N/A
346389	186.494	149.782	166.105	85.4069	46.9927	61.916	116.116	-1.07438	0.166932	-6.43604	1.22632e-10	2.04164e-09	346389	ENSG00000183742	MACC1	MET transcriptional regulator MACC1	0.409961	0.25575
4015	12070.1	11636.9	11275.9	5601.52	5199.19	5669.58	8575.52	-1.07155	0.0482192	-22.2225	2.08372e-109	1.72199e-106	4015	ENSG00000113083	LOX	lysyl oxidase	-1.59611	2.98868e-10
729970	525.871	472.827	461.879	220.88	226.965	210.301	353.12	-1.06502	0.106051	-10.0425	9.91356e-24	5.81033e-22	729970	NA	CNN3-DT	CNN3 divergent transcript	-0.0220181	0.918893
28983	30.3595	123.065	38.5792	14.7253	8.9986	8.54013	37.3779	-1.06342	0.203278	-5.23134	1.68281e-07	1.79326e-06	28983	ENSG00000087128	TMPRSS11E	transmembrane serine protease 11E	-0.0113522	NA
25893	241.792	193.503	247.55	92.2788	88.9862	105.684	161.632	-1.06228	0.144995	-7.32634	2.36524e-13	5.44467e-12	25893	ENSG00000162722	TRIM58	tripartite motif containing 58	#N/A	#N/A
9052	2757.3	2450.77	2629.82	1187.84	1202.81	1295.97	1920.75	-1.06043	0.0638216	-16.6155	5.3854e-62	1.71173e-59	9052	ENSG00000013588	GPRC5A	G protein-coupled receptor class C group 5 member A	0.307202	0.00748068	YES	YES
5673	124.691	117.397	91.0899	42.2126	32.9949	48.0382	76.0706	-1.05707	0.179743	-5.88101	4.07771e-09	5.58379e-08	5673	ENSG00000204941	PSG5	pregnancy specific beta-1-glycoprotein 5	1.43487	2.21684e-07
9508	1554.84	1480.82	1482.09	746.084	639.9	740.857	1107.43	-1.0504	0.0735919	-14.2733	3.20853e-46	6.16636e-44	9508	ENSG00000156140	ADAMTS3	ADAM metallopeptidase with thrombospondin type 1 motif 3	-1.08666	3.70517e-31
5054	81893.8	76172.1	80259.8	37732.2	37147.2	39534.4	58789.9	-1.04684	0.0429804	-24.3564	4.96525e-131	5.47104e-128	5054	ENSG00000106366	SERPINE1	serpin family E member 1	-0.733361	6.50269e-10	YES	YES
10622	306.848	317.377	343.998	177.686	114.982	129.17	231.677	-1.04684	0.1351	-7.74864	9.28831e-15	2.52081e-13	10622	ENSG00000113356	POLR3G	RNA polymerase III subunit G	0.600478	2.92143e-09	YES
1278	96.5	78.5346	91.0899	31.414	27.9956	35.228	60.127	-1.04679	0.185895	-5.63106	1.79102e-08	2.2375e-07	1278	ENSG00000164692	COL1A2	collagen type I alpha 2 chain	-2.86745	4.36665e-25	YES	YES
127845	66.1404	72.0575	82.5167	23.5605	26.9958	23.4854	49.1261	-1.0403	0.192625	-5.40063	6.64057e-08	7.56933e-07	127845	ENSG00000174567	GOLT1A	golgi transport 1A	0.165323	0.647676
9493	1303.29	1207.98	1325.63	645.951	576.91	602.079	943.639	-1.03231	0.0757623	-13.6256	2.82129e-42	4.5716e-40	9493	ENSG00000137807	KIF23	kinesin family member 23	0.154107	0.0832629
57091	122.522	120.636	116.809	50.0661	47.9925	45.9032	83.9882	-1.02615	0.169681	-6.04753	1.47082e-09	2.13617e-08	57091	ENSG00000087589	CASS4	Cas scaffold protein family member 4	-0.66673	0.0451942
6241	6803.79	6122.46	6740.65	3200.31	3138.51	3217.49	4870.54	-1.02348	0.0520722	-19.655	5.24091e-86	2.98696e-83	6241	ENSG00000171848	RRM2	ribonucleotide reductase regulatory subunit M2	-0.256968	0.02123
2591	3261.48	2989.98	2918.09	1419.52	1512.76	1507.33	2268.2	-1.02294	0.0603755	-16.943	2.16933e-64	7.46973e-62	2591	ENSG00000115339	GALNT3	polypeptide N-acetylgalactosaminyltransferase 3	-1.91923	1.28622e-75
81624	3274.49	2953.55	3116.35	1539.29	1502.77	1528.68	2319.19	-1.00984	0.0576442	-17.5186	1.03422e-68	3.97526e-66	81624	ENSG00000139734	DIAPH3	diaphanous related formin 3	0.00887161	0.947829
55638	238.539	184.597	196.111	92.2788	85.9866	91.8064	148.22	-1.00962	0.147289	-6.8547	7.14637e-12	1.3847e-10	55638	ENSG00000147642	SYBU	syntabulin	-0.29467	0.203424	YES	YES
29943	384.916	265.56	304.347	149.217	135.979	143.047	230.511	-1.00699	0.135458	-7.43392	1.05422e-13	2.53259e-12	29943	ENSG00000142623	PADI1	peptidyl arginine deiminase 1	-0.750219	5.05845e-06
9723	352.388	284.182	278.628	142.345	124.981	148.385	221.818	-1.0041	0.131196	-7.65343	1.95689e-14	5.10956e-13	9723	ENSG00000170381	SEMA3E	semaphorin 3E	0.368071	0.0951442	YES	YES
23266	715.618	672.807	666.564	335.738	293.954	357.618	507.05	-0.997767	0.0947048	-10.5355	5.92387e-26	4.09664e-24	23266	ENSG00000117114	ADGRL2	adhesion G protein-coupled receptor L2	-0.912108	9.41822e-06
6289	3095.59	3193.2	3037.04	1658.07	1485.77	1473.17	2323.81	-0.99226	0.0596119	-16.6453	3.27211e-62	1.06042e-59	6289	ENSG00000134339	SAA2	serum amyloid A2	-1.21708	1.28136e-05
9568	1063.67	942.415	1040.57	440.778	520.919	518.813	754.527	-0.991946	0.0860028	-11.5339	8.90408e-31	8.3145e-29	9568	ENSG00000136928	GABBR2	gamma-aminobutyric acid type B receptor subunit 2	-2.09438	2.18535e-24
890	889.101	824.208	920.544	445.687	430.933	407.791	653.044	-0.987077	0.0847734	-11.6437	2.47021e-31	2.38758e-29	890	ENSG00000145386	CCNA2	cyclin A2	0.242993	0.0177029
55504	749.23	680.093	750.152	384.822	306.952	360.821	538.678	-0.986956	0.0959949	-10.2813	8.55348e-25	5.50085e-23	55504	ENSG00000127863	TNFRSF19	TNF receptor superfamily member 19	0.108439	0.348443
115265	124.691	89.0599	111.451	53.0112	38.9939	34.1605	75.2279	-0.986253	0.181476	-5.43463	5.49099e-08	6.33765e-07	115265	ENSG00000145358	DDIT4L	DNA damage inducible transcript 4 like	-1.55921	3.09119e-07
5552	2763.8	2311.51	2725.2	1253.62	1300.8	1315.18	1945.02	-0.97973	0.0697304	-14.0503	7.67555e-45	1.40957e-42	5552	ENSG00000122862	SRGN	serglycin	-1.47313	9.95945e-07	YES
10060	427.202	367.574	325.78	182.594	146.977	195.356	274.247	-0.975849	0.127069	-7.6797	1.59457e-14	4.2168e-13	10060	ENSG00000069431	ABCC9	ATP binding cassette subfamily C member 9	-0.71858	2.28802e-05
130940	290.584	233.985	240.049	118.784	113.982	119.562	186.158	-0.973989	0.135708	-7.17711	7.11997e-13	1.54232e-11	130940	ENSG00000153237	CCDC148	coiled-coil domain containing 148	-0.273554	0.429466
144453	87.8258	80.9635	90.0182	30.4324	29.9953	39.4981	59.7889	-0.970364	0.185448	-5.23255	1.6719e-07	1.78393e-06	144453	ENSG00000127325	BEST3	bestrophin 3	-0.366394	0.184278
100128054	36.8652	33.195	21.4329	5.89013	5.99907	2.13503	17.5862	-0.969325	0.200632	-4.83135	1.35609e-06	1.22545e-05	100128054	ENSG00000268894	PLCE1-AS1	PLCE1 antisense RNA 1	0.0233841	0.959998
4071	2352.86	2224.88	2377.98	1175.08	1172.82	1156.12	1743.29	-0.966869	0.05939	-16.28	1.36884e-59	3.90072e-57	4071	ENSG00000169908	TM4SF1	transmembrane 4 L six family member 1	-0.0565914	0.633215	YES	YES
203430	49.8764	28.3372	33.221	11.7803	4.99922	5.33758	22.2586	-0.965488	0.203504	-4.74433	2.09201e-06	1.84311e-05	203430	ENSG00000179300	RTL3	retrotransposon Gag like 3	0.564258	0.0808974
29902	384.916	321.425	382.578	181.612	183.971	150.52	267.504	-0.965265	0.122267	-7.89473	2.90941e-15	8.23403e-14	29902	ENSG00000204856	FAM216A	family with sequence similarity 216 member A	0.265303	0.0177409	YES
6675	4971.38	4369.6	4700.24	2426.74	2283.64	2386.97	3523.09	-0.96411	0.0569142	-16.9397	2.2923e-64	7.73208e-62	6675	ENSG00000117143	UAP1	UDP-N-acetylglucosamine pyrophosphorylase 1	0.0531264	0.631006	YES
139067	16.264	33.195	21.4329	1.96338	1.99969	0	12.4758	-0.962811	0.190043	-5.06628	4.05664e-07	4.04148e-06	139067	ENSG00000189252	SPANXN3	SPANX family member N3	-0.21717	0.589121
139065	96.5	140.876	87.8749	42.2126	36.9942	50.1733	75.7719	-0.96273	0.183481	-5.24702	1.54578e-07	1.65578e-06	139065	ENSG00000179542	SLITRK4	SLIT and NTRK like family member 4	-2.24039	1.04957e-14
10468	300.343	279.324	296.846	132.528	145.977	137.71	215.455	-0.961044	0.124794	-7.70104	1.34963e-14	3.60368e-13	10468	ENSG00000134363	FST	follistatin	-0.0823374	0.84553
64881	110.595	91.4888	90.0182	44.176	37.9941	35.228	68.2501	-0.957429	0.180753	-5.2969	1.17788e-07	1.27994e-06	64881	ENSG00000280165	PCDH20	protocadherin 20	-1.21745	7.56382e-29
3592	103.006	110.11	132.884	39.2676	54.9914	50.1733	81.7387	-0.952468	0.17511	-5.43925	5.35053e-08	6.19282e-07	3592	ENSG00000168811	IL12A	interleukin 12A	-0.361313	0.289317
7472	94.3314	99.5851	81.4451	41.2309	35.9944	33.093	64.28	-0.952463	0.182707	-5.21307	1.8574e-07	1.96161e-06	7472	ENSG00000105989	WNT2	Wnt family member 2	-0.0457746	NA
64129	3218.11	3266.07	3030.61	1614.88	1626.75	1639.71	2399.35	-0.945799	0.0550155	-17.1915	3.07434e-66	1.12917e-63	64129	ENSG00000142910	TINAGL1	tubulointerstitial nephritis antigen like 1	-0.611854	5.69645e-10	YES
2825	107.343	106.062	109.308	43.1943	51.9919	41.6331	76.5887	-0.938587	0.174276	-5.38562	7.21936e-08	8.13926e-07	2825	ENSG00000183671	GPR1	G protein-coupled receptor 1	2.35097	8.425e-34
26289	1051.74	960.227	984.842	461.394	543.915	513.475	752.599	-0.937684	0.0830026	-11.297	1.35721e-29	1.18063e-27	26289	ENSG00000154027	AK5	adenylate kinase 5	-0.396351	0.0788886
84281	171.315	179.739	197.183	91.2971	79.9876	83.2663	133.798	-0.932638	0.148315	-6.28821	3.21146e-10	5.07447e-09	84281	ENSG00000187699	C2orf88	chromosome 2 open reading frame 88	-0.36513	0.0407554
4609	2451.53	2403	2429.42	1249.69	1201.81	1315.18	1841.77	-0.931579	0.0587796	-15.8487	1.43521e-56	3.70642e-54	4609	ENSG00000136997	MYC	MYC proto-oncogene, bHLH transcription factor	-0.756881	3.25387e-19
983	1721.82	1407.15	1530.31	826.582	798.876	767.544	1175.38	-0.92294	0.0778746	-11.8516	2.11082e-32	2.18047e-30	983	ENSG00000170312	CDK1	cyclin dependent kinase 1	0.809173	3.68907e-22
10326	478.163	480.923	456.521	248.367	212.967	250.866	354.635	-0.921192	0.105422	-8.73817	2.36914e-18	9.04322e-17	10326	ENSG00000101307	SIRPB1	signal regulatory protein beta 1	-0.361955	0.324609
79801	994.275	894.647	944.12	484.954	499.922	469.707	714.604	-0.920423	0.0810946	-11.35	7.41675e-30	6.66217e-28	79801	ENSG00000171241	SHCBP1	SHC binding and spindle associated 1	0.274377	0.00397059
51421	8842.22	8915.7	9233.3	4521.66	4964.23	4656.51	6855.6	-0.919404	0.0479659	-19.1679	6.86797e-82	3.54731e-79	51421	ENSG00000114019	AMOTL2	angiomotin like 2	-0.177706	0.101931	YES	YES
386618	1367.26	1240.36	1208.82	695.036	621.903	653.32	964.45	-0.918231	0.0766536	-11.979	4.57994e-33	4.9154e-31	386618	ENSG00000180332	KCTD4	potassium channel tetramerization domain containing 4	1.56663	6.97569e-26
241	271.067	278.514	279.7	122.711	146.977	136.642	205.935	-0.917423	0.127469	-7.19721	6.14563e-13	1.34358e-11	241	ENSG00000132965	ALOX5AP	arachidonate 5-lipoxygenase activating protein	-0.907978	7.89521e-05
6383	6179.25	5700.64	5889.76	3109.99	3115.52	3111.81	4517.83	-0.914549	0.0486097	-18.8141	5.78508e-79	2.81223e-76	6383	ENSG00000169439	SDC2	syndecan 2	0.124111	0.170504	YES	YES
3169	691.764	588.605	621.555	294.507	325.949	348.01	478.398	-0.912118	0.0988091	-9.23112	2.67819e-20	1.17104e-18	3169	ENSG00000129514	FOXA1	forkhead box A1	-2.30798	3.6834e-16
84623	39.0337	42.9107	46.0808	8.8352	16.9974	11.7427	27.6001	-0.90703	0.204336	-4.43891	9.04176e-06	7.06249e-05	84623	ENSG00000149571	KIRREL3	kirre like nephrin family adhesion molecule 3	0.212681	0.132142
51200	5765.06	5278.82	5387.16	2964.7	2802.56	2904.71	4183.84	-0.906614	0.0516081	-17.5673	4.3863e-69	1.72611e-66	51200	ENSG00000128510	CPA4	carboxypeptidase A4	1.25996	1.148e-34
5021	1956.02	1778.77	1937.54	913.952	997.845	1057.91	1440.34	-0.90525	0.0697002	-12.9878	1.43558e-38	2.04546e-36	5021	ENSG00000180914	OXTR	oxytocin receptor	-0.91377	1.5079e-07
5137	1102.7	1057.38	1040.57	526.185	548.915	594.607	811.727	-0.904199	0.0777012	-11.6369	2.67645e-31	2.55701e-29	5137	ENSG00000154678	PDE1C	phosphodiesterase 1C	0.171179	0.213232
2312	5671.81	5279.63	5449.32	2881.26	2683.58	3094.73	4176.72	-0.903398	0.056587	-15.9648	2.24911e-57	6.09399e-55	2312	ENSG00000143631	FLG	filaggrin	-0.0232543	0.933339
23768	1398.71	1346.42	1347.06	710.743	729.886	706.696	1039.92	-0.902894	0.0685908	-13.1635	1.42374e-39	2.08245e-37	23768	ENSG00000185070	FLRT2	fibronectin leucine rich transmembrane protein 2	-1.14561	0.000209563	YES
627	1498.46	1366.66	1463.87	768.662	719.888	781.422	1099.83	-0.901444	0.0708854	-12.7169	4.76236e-37	6.24701e-35	627	ENSG00000176697	BDNF	brain derived neurotrophic factor	0.154697	0.246912
2674	19612.3	19143	19826.5	10344.1	10027.4	10885.5	14973.1	-0.895902	0.0435579	-20.5681	5.30171e-94	3.50506e-91	2674	ENSG00000151892	GFRA1	GDNF family receptor alpha 1	-0.526752	2.55762e-05
101928036	74.8146	59.913	71.8003	30.4324	25.996	23.4854	47.7403	-0.895757	0.193367	-4.63242	3.61422e-06	3.04775e-05	101928036	ENSG00000234520	HRAT17	heart tissue-associated transcript 17	0.160859	0.696817
126374	1032.22	1051.72	1072.72	491.826	659.897	489.99	799.729	-0.889276	0.0945364	-9.4067	5.11943e-21	2.36956e-19	126374	ENSG00000142279	WTIP	WT1 interacting protein	0.400305	0.00224722	YES
3815	21.6854	21.8601	34.2927	3.92676	2.99953	5.33758	15.017	-0.884256	0.198013	-4.46565	7.98248e-06	6.29759e-05	3815	ENSG00000157404	KIT	KIT proto-oncogene, receptor tyrosine kinase	2.89351	8.93526e-56
84935	33.6124	37.2432	35.3643	11.7803	9.99845	6.4051	22.4006	-0.88353	0.20456	-4.31918	1.56611e-05	0.000116493	84935	ENSG00000102802	MEDAG	mesenteric estrogen dependent adipogenesis	-0.658131	0.0470539
729220	79.1517	76.9153	88.9466	35.3408	29.9953	37.3631	57.9521	-0.883093	0.185949	-4.74911	2.0431e-06	1.80194e-05	729220	NA	FLJ45513	uncharacterized LOC729220	-0.329529	0.2871
729993	1619.9	1486.49	1599.97	792.223	859.866	865.756	1204.03	-0.874869	0.0693612	-12.6132	1.7851e-36	2.23516e-34	729993	ENSG00000237515	SHISA9	shisa family member 9	-0.98716	1.11783e-09
503569	68.309	72.8672	77.1585	26.5056	39.9938	20.2828	50.8528	-0.86907	0.193862	-4.48293	7.36234e-06	5.85868e-05	503569	ENSG00000246763	RGMB-AS1	RGMB antisense RNA 1	0.199862	0.623289
54821	406.601	338.427	426.515	166.887	195.97	234.854	294.876	-0.867261	0.125628	-6.9034	5.07732e-12	9.99023e-11	54821	ENSG00000186871	ERCC6L	ERCC excision repair 6 like, spindle assembly checkpoint helicase	0.165323	0.28997
3045	30.3595	26.718	36.436	7.85351	8.9986	5.33758	19.2839	-0.863508	0.203357	-4.24627	2.17358e-05	0.000157264	3045	ENSG00000223609	HBD	hemoglobin subunit delta	-0.252713	0.472494
7057	143576	140187	143624	77568.2	76022.2	80413.9	110232	-0.861322	0.0383283	-22.4722	7.76643e-112	6.75598e-109	7057	ENSG00000137801	THBS1	thrombospondin 1	-1.30916	1.11301e-15	YES	YES
57451	5170.88	5408.36	5635.78	3074.65	2695.58	3082.99	4178.04	-0.855044	0.0584362	-14.6321	1.75336e-48	3.62244e-46	57451	ENSG00000145934	TENM2	teneurin transmembrane protein 2	-0.105604	0.742184	YES
79888	740.556	1167.49	1009.49	454.522	497.923	450.492	720.079	-0.85504	0.160867	-5.3152	1.06541e-07	1.17073e-06	79888	ENSG00000153395	LPCAT1	lysophosphatidylcholine acyltransferase 1	0.103138	0.811008	YES
4908	320.944	322.235	355.786	173.759	177.972	168.668	253.227	-0.853869	0.117535	-7.26478	3.73632e-13	8.35642e-12	4908	ENSG00000185652	NTF3	neurotrophin 3	0.464106	0.00817624
57211	2229.26	2045.95	2060.77	1143.67	1004.84	1283.15	1627.94	-0.853371	0.0758663	-11.2484	2.3596e-29	2.01029e-27	57211	ENSG00000112414	ADGRG6	adhesion G protein-coupled receptor G6	-0.1033	0.551148	YES
26038	120.354	131.161	112.523	49.0845	69.9891	51.2408	89.0587	-0.850738	0.17046	-4.99082	6.01224e-07	5.80773e-06	26038	ENSG00000116254	CHD5	chromodomain helicase DNA binding protein 5	0.501541	0.145146
693199	193	165.166	162.89	91.2971	82.9871	83.2663	129.768	-0.850582	0.150092	-5.66708	1.45252e-08	1.84387e-07	693199	ENSG00000283759	MIR614	microRNA 614	0.339277	0.190165
100288413	235.286	207.267	250.765	117.803	91.9857	137.71	173.469	-0.849863	0.144349	-5.88755	3.91967e-09	5.38971e-08	100288413	ENSG00000226887	ERVMER34-1	endogenous retrovirus group MER34 member 1, envelope	-0.80839	0.0001785
4688	753.567	689.809	766.227	403.474	375.942	408.859	566.313	-0.849223	0.0885179	-9.5938	8.4901e-22	4.23941e-20	4688	ENSG00000116701	NCF2	neutrophil cytosolic factor 2	-1.23809	3.74146e-18	YES	YES
11174	910.786	785.346	790.875	469.247	400.938	468.64	637.639	-0.845244	0.0914775	-9.23991	2.46703e-20	1.08444e-18	11174	ENSG00000049192	ADAMTS6	ADAM metallopeptidase with thrombospondin type 1 motif 6	-0.02726	0.886825
400221	176.736	152.211	169.32	101.114	77.9879	61.916	123.214	-0.845065	0.159684	-5.29212	1.20905e-07	1.31209e-06	400221	ENSG00000232774	FLJ22447	uncharacterized LOC400221	0.149111	0.719969
646643	179.989	194.312	193.968	97.1872	99.9845	89.6714	142.519	-0.843593	0.143744	-5.86872	4.39168e-09	5.98892e-08	646643	ENSG00000187550	SBK2	SH3 domain binding kinase family member 2	-0.20115	0.620695
4500	1772.78	1541.55	1677.13	856.033	987.846	877.499	1285.47	-0.843576	0.0744499	-11.3308	9.2364e-30	8.12017e-28	4500	ENSG00000260549	MT1L	metallothionein 1L, pseudogene	-0.118117	0.580658
55355	1108.12	1025.81	1129.51	565.453	652.898	554.041	839.306	-0.842317	0.0816039	-10.322	5.6033e-25	3.64612e-23	55355	ENSG00000123485	HJURP	Holliday junction recognition protein	0.120255	0.356343
51400	7821.92	6776.64	7342.92	4049.47	4033.37	4025.6	5674.99	-0.841862	0.0539221	-15.6126	5.97936e-55	1.47503e-52	51400	ENSG00000214517	PPME1	protein phosphatase methylesterase 1	0.00827115	0.937846	YES
150468	992.107	868.738	938.762	492.808	515.92	514.543	720.48	-0.83946	0.0820077	-10.2364	1.36267e-24	8.59625e-23	150468	ENSG00000169607	CKAP2L	cytoskeleton associated protein 2 like	0.0906381	0.571796
652	459.73	464.73	517.605	265.056	277.957	225.246	368.387	-0.838744	0.107201	-7.82405	5.11501e-15	1.41847e-13	652	ENSG00000125378	BMP4	bone morphogenetic protein 4	-0.873374	0.00486713	YES
3705	370.82	327.902	232.547	69.6999	68.9893	147.317	202.879	-0.838282	0.204677	-4.09564	4.21009e-05	0.000283324	3705	ENSG00000100605	ITPK1	inositol-tetrakisphosphate 1-kinase	-0.0355415	0.940751
6423	235.286	284.992	255.052	119.766	141.978	140.912	196.331	-0.835824	0.132884	-6.28987	3.17737e-10	5.02542e-09	6423	ENSG00000145423	SFRP2	secreted frizzled related protein 2	-0.695371	0.0233852	YES
56911	1404.13	1086.53	1287.05	672.457	684.893	701.358	972.736	-0.832872	0.085999	-9.68467	3.50342e-22	1.8209e-20	56911	ENSG00000156265	MAP3K7CL	MAP3K7 C-terminal like	-0.344273	0.0960613
4837	7183.29	6898.9	7237.9	3976.82	3978.38	3929.53	5534.14	-0.832482	0.0447538	-18.6014	3.13145e-77	1.43768e-74	4837	ENSG00000166741	NNMT	nicotinamide N-methyltransferase	0.348136	0.000847816
55872	593.095	476.065	556.184	303.342	263.959	303.175	415.97	-0.832355	0.106252	-7.83375	4.73515e-15	1.31534e-13	55872	ENSG00000168078	PBK	PDZ binding kinase	0.704102	4.31168e-15
2491	642.972	521.405	601.193	321.994	308.952	320.255	452.795	-0.831593	0.100449	-8.27876	1.24464e-16	3.94845e-15	2491	ENSG00000102384	CENPI	centromere protein I	0.294004	0.00297699
51473	3543.39	3236.92	3269.59	1977.12	1744.73	1851.07	2603.8	-0.830996	0.0605434	-13.7256	7.13132e-43	1.22778e-40	51473	ENSG00000146038	DCDC2	doublecortin domain containing 2	-0.685578	1.71277e-12	YES
84909	2090.47	2020.85	1962.18	1167.23	1039.84	1164.66	1574.21	-0.82724	0.0649352	-12.7395	3.56808e-37	4.75591e-35	84909	ENSG00000148120	AOPEP	aminopeptidase O (putative)	0.0575626	0.685511
9212	1156.92	1151.3	1247.4	625.336	698.891	638.375	919.702	-0.826159	0.0756022	-10.9277	8.49599e-28	6.59257e-26	9212	ENSG00000178999	AURKB	aurora kinase B	-0.077387	0.601
9510	30831.2	30344.3	32076.5	17100	16420.4	18697.6	24245	-0.824074	0.049738	-16.5683	1.18091e-61	3.68266e-59	9510	ENSG00000154734	ADAMTS1	ADAM metallopeptidase with thrombospondin type 1 motif 1	-1.18901	2.23687e-53	YES
81849	495.511	441.251	504.745	255.239	241.962	282.892	370.267	-0.820706	0.105633	-7.7694	7.88567e-15	2.15785e-13	81849	ENSG00000117069	ST6GALNAC5	ST6 N-acetylgalactosaminide alpha-2,6-sialyltransferase 5	-0.141195	0.371261
101927574	48.7921	42.101	58.9405	18.6521	23.9963	10.6752	33.8595	-0.81958	0.202993	-4.03747	5.40297e-05	0.000353805	101927574	NA	LINC01186	long intergenic non-protein coding RNA 1186	0.600829	0.0167699
9829	249.382	212.934	252.908	130.565	126.98	115.292	181.344	-0.817982	0.135099	-6.05467	1.40709e-09	2.05445e-08	9829	ENSG00000116675	DNAJC6	DnaJ heat shock protein family (Hsp40) member C6	-0.490461	0.00473729
284111	50.9607	60.7226	77.1585	27.4873	21.9966	27.7554	44.3468	-0.816567	0.196575	-4.15398	3.26742e-05	0.000226527	284111	ENSG00000141485	SLC13A5	solute carrier family 13 member 5	-0.259055	NA
8572	48.7921	44.5299	50.3673	17.6704	22.9964	11.7427	32.6832	-0.81275	0.202595	-4.01169	6.02857e-05	0.000389524	8572	ENSG00000131435	PDLIM4	PDZ and LIM domain 4	-1.6384	4.04492e-08
55423	42.2865	45.3396	38.5792	14.7253	13.9978	16.0127	28.4902	-0.811186	0.203573	-3.98474	6.75546e-05	0.000431931	55423	ENSG00000089012	SIRPG	signal regulatory protein gamma	-0.22788	NA
124976	1237.15	1122.96	1280.62	686.201	678.894	665.063	945.148	-0.810958	0.0752736	-10.7735	4.59358e-27	3.4046e-25	124976	ENSG00000183018	SPNS2	sphingolipid transporter 2	-0.89228	7.25008e-19	YES
2998	96.5	72.0575	81.4451	36.3225	41.9935	34.1605	60.4132	-0.810608	0.185549	-4.36869	1.24992e-05	9.46775e-05	2998	ENSG00000111713	GYS2	glycogen synthase 2	-0.0202085	NA
11004	1188.36	999.09	1109.15	566.435	642.9	622.362	854.716	-0.809428	0.0831637	-9.73295	2.18175e-22	1.15577e-20	11004	ENSG00000142945	KIF2C	kinesin family member 2C	0.0663405	0.503937
90355	1451.84	1229.84	1340.63	721.541	763.881	760.072	1044.63	-0.80915	0.0760534	-10.6392	1.95729e-26	1.38841e-24	90355	ENSG00000181751	MACIR	macrophage immunometabolism regulator	-0.0690723	0.660566	YES
116441	104.09	107.681	80.3734	51.0478	35.9944	49.1058	71.3821	-0.808509	0.180919	-4.46891	7.86184e-06	6.21427e-05	116441	ENSG00000163762	TM4SF18	transmembrane 4 L six family member 18	-0.21254	0.391909
2134	130.112	138.448	120.024	74.6084	60.9905	56.5784	96.7936	-0.808129	0.164737	-4.90557	9.31558e-07	8.68894e-06	2134	ENSG00000158008	EXTL1	exostosin like glycosyltransferase 1	-0.641838	0.0550228	YES	YES
254778	214.685	162.737	162.89	104.059	85.9866	84.3338	135.782	-0.806294	0.153814	-5.24199	1.58853e-07	1.70046e-06	254778	ENSG00000169085	VXN	vexin	0.114624	0.569705
10	21.6854	34.8143	30.0061	10.7986	4.99922	4.27007	17.7623	-0.806091	0.201199	-4.00644	6.16402e-05	0.000397654	10	ENSG00000156006	NAT2	N-acetyltransferase 2	-0.262064	0.449136
6444	911.871	765.105	866.961	482.009	432.933	495.328	659.034	-0.805794	0.0898666	-8.96656	3.05928e-19	1.24541e-17	6444	ENSG00000170624	SGCD	sarcoglycan delta	-0.394164	0.133504
4085	1118.97	995.041	1158.45	620.427	575.91	631.97	850.127	-0.803872	0.0808076	-9.94797	2.57368e-23	1.46178e-21	4085	ENSG00000164109	MAD2L1	mitotic arrest deficient 2 like 1	0.112346	0.404548
64078	106.258	80.9635	79.3018	40.2492	38.9939	43.7682	64.9225	-0.802639	0.182907	-4.38825	1.14267e-05	8.72335e-05	64078	ENSG00000197506	SLC28A3	solute carrier family 28 member 3	-0.956267	0.00284806
23127	87.8258	93.108	91.0899	45.1577	36.9942	45.9032	66.6798	-0.802601	0.179607	-4.46865	7.87163e-06	6.21904e-05	23127	ENSG00000198756	COLGALT2	collagen beta(1-O)galactosyltransferase 2	0.102606	0.751977	YES
4139	159.388	171.643	152.174	84.4253	89.986	73.6586	121.879	-0.8015	0.152551	-5.25398	1.48846e-07	1.59956e-06	4139	ENSG00000116141	MARK1	microtubule affinity regulating kinase 1	-0.194459	0.369059
3161	289.5	246.939	281.843	146.272	140.978	150.52	209.342	-0.801247	0.127354	-6.29149	3.14423e-10	4.99211e-09	3161	ENSG00000072571	HMMR	hyaluronan mediated motility receptor	0.325001	0.000605476
64577	30.3595	30.7661	35.3643	12.762	8.9986	5.33758	20.598	-0.799075	0.203936	-3.91826	8.9189e-05	0.000555223	64577	ENSG00000118514	ALDH8A1	aldehyde dehydrogenase 8 family member A1	-0.0761813	NA
147381	26.0225	44.5299	33.221	10.7986	13.9978	5.33758	22.3179	-0.788645	0.203977	-3.86635	0.000110475	0.000673281	147381	ENSG00000141668	CBLN2	cerebellin 2 precursor	1.88253	6.98332e-36
392255	198.421	222.65	232.547	113.876	112.982	122.764	167.207	-0.787416	0.137153	-5.74117	9.40248e-09	1.23533e-07	392255	ENSG00000156466	GDF6	growth differentiation factor 6	-1.02097	1.50744e-08
64151	1364.01	1147.25	1347.06	730.377	679.894	771.814	1006.73	-0.786792	0.0811661	-9.69361	3.20984e-22	1.6842e-20	64151	ENSG00000109805	NCAPG	non-SMC condensin I complex subunit G	0.19211	0.0209504
570	43.3708	31.5758	23.5762	1.96338	0.999845	14.9452	19.4052	-0.786586	0.195253	-4.02854	5.61239e-05	0.000365779	570	ENSG00000136881	BAAT	bile acid-CoA:amino acid N-acyltransferase	0.661588	0.0484093
84109	31.4438	52.6263	27.8628	8.8352	15.9975	9.60765	24.3955	-0.785401	0.204399	-3.8425	0.00012179	0.000733241	84109	ENSG00000186867	QRFPR	pyroglutamylated RFamide peptide receptor	-1.17439	1.82143e-05
6575	2584.9	2440.24	2501.22	1370.44	1440.78	1504.13	1973.62	-0.785327	0.0589796	-13.3152	1.88763e-40	2.86228e-38	6575	ENSG00000168575	SLC20A2	solute carrier family 20 member 2	-0.502138	1.19682e-06	YES
91179	2601.16	2958.41	2799.14	1507.87	1736.73	1540.43	2190.62	-0.783555	0.0667139	-11.745	7.49081e-32	7.54927e-30	91179	ENSG00000244486	SCARF2	scavenger receptor class F member 2	-0.0775432	0.478006
55165	1583.03	1378.81	1518.52	819.71	845.868	888.174	1172.35	-0.783488	0.0723488	-10.8293	2.50009e-27	1.86975e-25	55165	ENSG00000138180	CEP55	centrosomal protein 55	0.855698	1.54277e-22
5318	374.073	381.338	386.864	203.21	193.97	235.921	295.896	-0.782735	0.112487	-6.95843	3.44096e-12	6.89359e-11	5318	ENSG00000057294	PKP2	plakophilin 2	-0.698345	0.00018832
1266	17881.8	16975.6	16631.9	9966.11	9739.49	10056	13541.8	-0.781946	0.0430214	-18.1757	8.03272e-74	3.40423e-71	1266	ENSG00000117519	CNN3	calponin 3	0.0871654	0.378028	YES
9369	869.584	802.348	842.314	483.973	441.931	500.665	656.803	-0.780793	0.0839419	-9.30158	1.38372e-20	6.18113e-19	9369	ENSG00000021645	NRXN3	neurexin 3	-0.977418	1.04651e-07
6943	86.7416	106.872	111.451	46.1394	50.9921	52.3083	75.7507	-0.780056	0.175464	-4.44567	8.76187e-06	6.86332e-05	6943	ENSG00000118526	TCF21	transcription factor 21	0.37979	0.207944	YES	YES
1602	63.9719	84.202	82.5167	35.3408	34.9946	36.2956	56.2203	-0.779763	0.187385	-4.16129	3.16457e-05	0.000220228	1602	ENSG00000276644	DACH1	dachshund family transcription factor 1	-0.117234	0.768661	YES	YES
6446	4022.64	3732.42	3848.28	2241.2	1884.71	2509.73	3039.83	-0.778318	0.0750074	-10.3765	3.1705e-25	2.12154e-23	6446	ENSG00000118515	SGK1	serum/glucocorticoid regulated kinase 1	-0.671345	0.000202487	YES
4493	5469.06	4937.96	5950.85	2929.36	3429.47	3026.41	4290.52	-0.777845	0.0683618	-11.3784	5.36022e-30	4.86779e-28	4493	ENSG00000169715	MT1E	metallothionein 1E	-0.437994	0.143712
284110	54.2135	44.5299	39.6509	11.7803	17.9972	22.4178	31.7649	-0.776002	0.203217	-3.81859	0.000134214	0.000798521	284110	ENSG00000167914	GSDMA	gasdermin A	0.0728584	0.833445
79772	1292.45	1207.98	1200.24	761.791	644.9	710.966	969.721	-0.775278	0.0767028	-10.1076	5.11391e-24	3.05136e-22	79772	ENSG00000175471	MCTP1	multiple C2 and transmembrane domain containing 1	-0.824987	4.34033e-10
699	663.573	585.366	657.99	394.639	314.951	364.023	496.757	-0.774757	0.0990344	-7.82311	5.15353e-15	1.42676e-13	699	ENSG00000169679	BUB1	BUB1 mitotic checkpoint serine/threonine kinase	-0.0379487	0.799285
374393	2533.94	2212.73	2300.82	1397.93	1334.79	1325.86	1851.01	-0.774724	0.0642022	-12.0669	1.57906e-33	1.72839e-31	374393	ENSG00000189057	FAM111B	family with sequence similarity 111 member B	0.101577	0.336512
332	1115.71	1006.38	1128.44	622.391	625.903	612.755	851.93	-0.773024	0.0768059	-10.0647	7.91665e-24	4.68983e-22	332	ENSG00000089685	BIRC5	baculoviral IAP repeat containing 5	0.0554229	0.683646
9156	645.14	544.884	588.334	340.646	312.951	350.145	463.684	-0.77271	0.0979949	-7.8852	3.1402e-15	8.84176e-14	9156	ENSG00000174371	EXO1	exonuclease 1	0.438031	8.63661e-05
157570	627.792	507.641	559.399	330.829	295.954	326.66	441.379	-0.771511	0.102346	-7.53825	4.76322e-14	1.19283e-12	157570	ENSG00000171320	ESCO2	establishment of sister chromatid cohesion N-acetyltransferase 2	-0.0148301	0.92843
10272	8815.11	9859.74	9136.85	5138.16	5862.09	5142.23	7325.7	-0.768841	0.0583182	-13.1836	1.09128e-39	1.61041e-37	10272	ENSG00000070404	FSTL3	follistatin like 3	0.060031	0.599674
306	1999.39	1634.65	1866.81	1001.32	1064.83	1098.47	1444.25	-0.768243	0.0751815	-10.2185	1.6384e-24	1.02187e-22	306	ENSG00000138772	ANXA3	annexin A3	-0.16838	0.127231	YES	YES
3487	15985.4	17977.1	16469.1	9631.35	10167.4	9575.62	13301	-0.768124	0.0501845	-15.306	6.97284e-53	1.60065e-50	3487	ENSG00000141753	IGFBP4	insulin like growth factor binding protein 4	-1.45195	1.61947e-34	YES
5801	266.73	265.56	257.195	152.162	129.98	152.655	204.047	-0.767584	0.127357	-6.02705	1.66984e-09	2.41462e-08	5801	ENSG00000153233	PTPRR	protein tyrosine phosphatase receptor type R	-0.386197	0.115693
9133	481.416	405.627	458.664	254.257	247.961	254.069	350.332	-0.767461	0.106519	-7.20491	5.80806e-13	1.27315e-11	9133	ENSG00000157456	CCNB2	cyclin B2	0.188352	0.0295361
5205	3411.11	3088.76	3142.07	1790.6	1886.71	1923.66	2540.48	-0.767158	0.0580151	-13.2234	6.4272e-40	9.57016e-38	5205	ENSG00000081923	ATP8B1	ATPase phospholipid transporting 8B1	-0.575207	1.60634e-05	YES	YES
84570	703.691	669.568	719.074	418.2	349.946	423.804	547.38	-0.767067	0.0927597	-8.2694	1.3464e-16	4.25492e-15	84570	ENSG00000188517	COL25A1	collagen type XXV alpha 1 chain	-2.23131	3.27641e-14
259266	504.185	519.786	502.602	276.836	247.961	337.335	398.118	-0.764948	0.107656	-7.10545	1.19928e-12	2.51544e-11	259266	ENSG00000066279	ASPM	assembly factor for spindle microtubules	0.351448	0.0196422
79817	67.2247	63.1515	73.9436	24.5422	27.9956	39.4981	49.3926	-0.763591	0.192926	-3.95794	7.55988e-05	0.000477272	79817	ENSG00000120162	MOB3B	MOB kinase activator 3B	-1.34464	1.39419e-05
10234	3245.22	3228.01	3293.17	2072.35	1727.73	1877.76	2574.04	-0.763422	0.0626281	-12.1898	3.52418e-34	3.93565e-32	10234	ENSG00000128606	LRRC17	leucine rich repeat containing 17	-0.168869	0.297318
79682	2460.21	2183.59	2384.41	1377.31	1302.8	1409.12	1852.91	-0.760905	0.0636031	-11.9633	5.53007e-33	5.89684e-31	79682	ENSG00000151725	CENPU	centromere protein U	0.35676	0.000959925
1063	2491.65	2522.82	2530.16	1510.82	1405.78	1491.32	1992.09	-0.760337	0.056659	-13.4195	4.64693e-41	7.24571e-39	1063	ENSG00000117724	CENPF	centromere protein F	0.0461322	0.837478
6747	15305.5	13409.2	14552.9	8587.82	7674.81	9026.92	11426.2	-0.757582	0.0600042	-12.6255	1.52782e-36	1.92762e-34	6747	ENSG00000114850	SSR3	signal sequence receptor subunit 3	-0.414613	1.04814e-05	YES
55771	3901.2	3296.83	3497.85	2066.46	2005.69	2173.46	2823.58	-0.75609	0.0637901	-11.8528	2.0815e-32	2.16371e-30	55771	ENSG00000068489	PRR11	proline rich 11	-0.0820521	0.630108
9319	1970.12	1704.28	1906.46	1027.83	1071.83	1148.65	1471.53	-0.755662	0.0707389	-10.6824	1.23045e-26	8.84215e-25	9319	ENSG00000071539	TRIP13	thyroid hormone receptor interactor 13	0.237424	0.00299831
143903	5884.33	5735.45	5922.99	3391.74	3548.45	3378.69	4643.61	-0.755202	0.0465649	-16.2183	3.74684e-59	1.04962e-56	143903	ENSG00000204381	LAYN	layilin	-0.0704682	0.609699	YES
10721	562.736	554.6	554.041	356.353	268.958	327.728	437.403	-0.755198	0.102957	-7.33508	2.21584e-13	5.12215e-12	10721	ENSG00000051341	POLQ	DNA polymerase theta	0.173945	0.157367
100506658	80.2359	61.5323	53.5823	22.5788	8.9986	42.7007	44.9381	-0.754045	0.203802	-3.69989	0.00021569	0.00121711	100506658	ENSG00000197822	OCLN	occludin	-0.357788	0.327196
3491	34023.3	34941.4	35920.5	19591.6	20303.8	21941.7	27787.1	-0.752004	0.0473402	-15.8851	8.03723e-57	2.10856e-54	3491	ENSG00000142871	CCN1	cellular communication network factor 1	#N/A	#N/A
57576	119.27	116.587	137.171	49.0845	77.9879	64.051	94.0252	-0.749707	0.169683	-4.41827	9.94923e-06	7.67698e-05	57576	ENSG00000117245	KIF17	kinesin family member 17	-0.0692717	0.866023
203447	5401.83	4946.87	5134.25	3063.85	2770.57	3268.74	4097.69	-0.749189	0.0601704	-12.4511	1.37872e-35	1.63939e-33	203447	ENSG00000123572	NRK	Nik related kinase	-0.876365	2.03402e-12
347733	697.185	745.674	690.14	414.273	421.934	408.859	563.011	-0.741881	0.0862768	-8.59885	8.05179e-18	2.88677e-16	347733	ENSG00000137285	TUBB2B	tubulin beta 2B class IIb	0.938517	4.54938e-18	YES	YES
8321	2158.78	2608.64	2193.66	1307.61	1463.77	1325.86	1843.05	-0.740029	0.0744361	-9.9418	2.73822e-23	1.54991e-21	8321	ENSG00000157240	FZD1	frizzled class receptor 1	-0.396933	0.0189242	YES
151648	265.646	207.267	241.12	135.473	123.981	137.71	185.199	-0.735455	0.135855	-5.41353	6.17941e-08	7.07785e-07	151648	ENSG00000129810	SGO1	shugoshin 1	0.111293	0.512418
114757	1639.42	1518.07	1380.28	885.483	879.863	913.794	1202.82	-0.735408	0.072987	-10.0759	7.06278e-24	4.19905e-22	114757	ENSG00000161544	CYGB	cytoglobin	-0.733816	0.00189356
389816	28.191	29.9565	26.7911	5.89013	9.99845	9.60765	18.4058	-0.735193	0.20321	-3.61789	0.000297014	0.001609	389816	ENSG00000184709	LRRC26	leucine rich repeat containing 26	0.218741	NA
23286	8171.05	8180.55	8202.38	4883.9	5005.22	4810.23	6542.22	-0.732029	0.0425523	-17.203	2.51938e-66	9.46371e-64	23286	ENSG00000113645	WWC1	WW and C2 domain containing 1	-0.676458	9.17316e-11
3855	8143.95	7311.81	7984.83	4340.05	4988.22	4638.36	6234.54	-0.731582	0.0575084	-12.7213	4.50169e-37	5.95231e-35	3855	ENSG00000135480	KRT7	keratin 7	-0.672515	1.83954e-07	YES
214	18335	17485.7	17036	10953.7	9747.48	10882.3	14073.3	-0.731105	0.0512027	-14.2787	2.97279e-46	5.78051e-44	214	ENSG00000170017	ALCAM	activated leukocyte cell adhesion molecule	-0.0601885	0.602297	YES	YES
990	5433.27	4975.21	5228.56	3116.86	3068.52	3167.32	4164.96	-0.729646	0.0501738	-14.5424	6.52858e-48	1.33215e-45	990	ENSG00000094804	CDC6	cell division cycle 6	0.176813	0.131061
55536	2512.25	2361.71	2377.98	1511.8	1390.78	1424.07	1929.77	-0.728375	0.0593739	-12.2676	1.35218e-34	1.552e-32	55536	ENSG00000164649	CDCA7L	cell division cycle associated 7 like	0.109083	0.241625
7272	491.174	450.157	514.39	320.031	254.96	269.014	383.288	-0.72515	0.107258	-6.76081	1.37222e-11	2.55118e-10	7272	ENSG00000112742	TTK	TTK protein kinase	0.646515	2.99425e-17
1058	172.399	161.117	157.532	102.096	87.9863	78.9962	126.688	-0.723676	0.15109	-4.7897	1.67034e-06	1.49471e-05	1058	ENSG00000115163	CENPA	centromere protein A	0.194763	0.0637758
688	1201.37	1042	1184.17	676.384	667.896	688.548	910.061	-0.723575	0.077382	-9.3507	8.70736e-21	3.96461e-19	688	ENSG00000102554	KLF5	Kruppel like factor 5	-0.761404	6.86764e-09
9024	293.837	292.278	313.992	170.814	187.971	156.925	235.97	-0.723264	0.121372	-5.95907	2.53679e-09	3.57748e-08	9024	ENSG00000174672	BRSK2	BR serine/threonine kinase 2	-0.420066	0.232363
59277	1420.39	1280.03	1303.12	800.077	796.876	787.827	1064.72	-0.723241	0.0705593	-10.2501	1.18188e-24	7.5131e-23	59277	ENSG00000074527	NTN4	netrin 4	-0.186054	0.483783	YES	YES
29089	1027.89	1064.67	1066.29	645.951	632.902	603.147	840.141	-0.721641	0.0741034	-9.7383	2.06991e-22	1.1036e-20	29089	ENSG00000077152	UBE2T	ubiquitin conjugating enzyme E2 T	0.608505	1.22026e-06
4324	2919.94	3257.97	3137.78	1799.44	1995.69	1791.29	2483.68	-0.721201	0.0616465	-11.699	1.28984e-31	1.27655e-29	4324	ENSG00000102996	MMP15	matrix metallopeptidase 15	0.484166	0.0098986
6288	23963.4	23134.5	21874.4	13172.3	14524.7	13872.4	18423.6	-0.720034	0.0487102	-14.782	1.91455e-49	4.10957e-47	6288	ENSG00000173432	SAA1	serum amyloid A1	-1.45103	3.54847e-17
25780	108.427	89.8695	92.1615	52.0295	42.9933	54.4433	73.3207	-0.718049	0.176635	-4.06517	4.79975e-05	0.000318468	25780	ENSG00000152689	RASGRP3	RAS guanyl releasing protein 3	0.482603	0.171439
5803	71.5618	83.3924	61.0838	32.3957	43.9932	26.6879	53.1858	-0.717957	0.191888	-3.74153	0.0001829	0.0010511	5803	ENSG00000106278	PTPRZ1	protein tyrosine phosphatase receptor type Z1	-0.0971429	NA
9055	2201.07	1910.74	1960.04	1197.66	1197.81	1242.59	1618.32	-0.717889	0.066611	-10.7773	4.40459e-27	3.27924e-25	9055	ENSG00000198901	PRC1	protein regulator of cytokinesis 1	0.242281	0.0259467
29968	7020.64	6422.02	6846.74	3732.38	4188.35	4292.48	5417.1	-0.717535	0.0571926	-12.5459	4.18394e-36	5.0476e-34	29968	ENSG00000135069	PSAT1	phosphoserine aminotransferase 1	-0.134794	0.146148
63898	3096.67	2670.99	2907.37	1643.35	1669.74	1887.37	2312.58	-0.716958	0.0676809	-10.5932	3.20447e-26	2.24422e-24	63898	ENSG00000104611	SH2D4A	SH2 domain containing 4A	-0.224985	0.0723942	YES	YES
2324	47.7079	55.8648	76.0868	29.4507	22.9964	28.8229	43.4883	-0.716804	0.197407	-3.6311	0.000282211	0.0015394	2324	ENSG00000037280	FLT4	fms related receptor tyrosine kinase 4	0.101336	0.818408
146330	359.977	403.198	380.434	213.027	255.96	194.288	301.147	-0.716525	0.116505	-6.15015	7.74094e-10	1.15995e-08	146330	ENSG00000127585	FBXL16	F-box and leucine rich repeat protein 16	0.099336	0.809246
23114	139.871	125.493	126.454	60.8647	75.9882	74.7262	100.566	-0.715653	0.16173	-4.42499	9.64466e-06	7.47687e-05	23114	ENSG00000163531	NFASC	neurofascin	-0.411747	0.254616
978	499.848	467.969	473.667	258.184	317.951	269.014	381.106	-0.715113	0.104524	-6.84162	7.83013e-12	1.50835e-10	978	ENSG00000158825	CDA	cytidine deaminase	-0.57677	4.91517e-05
1009	2023.25	2016.8	1890.38	1215.33	1175.82	1182.81	1584.06	-0.714364	0.0609922	-11.7124	1.10143e-31	1.09665e-29	1009	ENSG00000140937	CDH11	cadherin 11	-1.91091	7.05619e-27	YES
140876	214.685	239.652	213.257	139.4	129.98	108.887	174.31	-0.714122	0.137262	-5.20262	1.96497e-07	2.06334e-06	140876	ENSG00000042062	RIPOR3	RIPOR family member 3	-0.685464	0.0291265
84868	105.174	106.872	117.881	69.6999	56.9911	45.9032	83.7535	-0.714076	0.172519	-4.13911	3.48659e-05	0.000239113	84868	ENSG00000135077	HAVCR2	hepatitis A virus cellular receptor 2	-0.747275	2.55762e-05
6335	242.876	198.361	220.759	127.62	113.982	132.372	172.662	-0.713764	0.137597	-5.18736	2.13293e-07	2.22698e-06	6335	ENSG00000169432	SCN9A	sodium voltage-gated channel alpha subunit 9	-0.324608	0.236864
148213	49.8764	43.7203	48.2241	24.5422	17.9972	18.1478	33.7513	-0.712921	0.201224	-3.54292	0.000395725	0.00206979	148213	ENSG00000196172	ZNF681	zinc finger protein 681	0.0616873	0.892975
5557	773.084	698.715	699.785	423.108	422.934	446.222	577.308	-0.712564	0.0870098	-8.18947	2.62388e-16	8.07587e-15	5557	ENSG00000198056	PRIM1	DNA primase subunit 1	0.388065	0.000121059
201161	240.708	257.464	274.341	129.583	142.978	169.735	202.468	-0.712192	0.13159	-5.41219	6.22598e-08	7.12132e-07	201161	ENSG00000166582	CENPV	centromere protein V	0.343463	0.0241316
53904	160.472	154.64	139.314	92.2788	69.9891	87.5364	117.372	-0.711613	0.155803	-4.56739	4.93835e-06	4.07377e-05	53904	ENSG00000095777	MYO3A	myosin IIIA	0.131766	0.563503
2786	420.697	399.15	429.73	236.587	255.96	241.259	330.564	-0.711471	0.105453	-6.7468	1.51137e-11	2.7973e-10	2786	ENSG00000168243	GNG4	G protein subunit gamma 4	-2.78364	6.27972e-52
54518	1334.74	1281.65	1305.26	805.967	774.879	780.355	1047.14	-0.710326	0.0680893	-10.4323	1.76614e-25	1.19146e-23	54518	ENSG00000077420	APBB1IP	amyloid beta precursor protein binding family B member 1 interacting protein	0.571055	8.93585e-11
55247	234.202	199.98	195.04	107.004	123.981	124.899	164.184	-0.710062	0.139853	-5.07719	3.83056e-07	3.84385e-06	55247	ENSG00000109674	NEIL3	nei like DNA glycosylase 3	0.129747	0.252551
7153	4895.48	4676.45	4899.56	3051.09	2742.57	2975.17	3873.39	-0.710017	0.0530883	-13.3743	8.54966e-41	1.32064e-38	7153	ENSG00000131747	TOP2A	DNA topoisomerase II alpha	0.222462	0.0176698
55143	666.826	586.176	653.704	402.492	354.945	372.563	506.118	-0.70999	0.0938941	-7.56161	3.9812e-14	1.0046e-12	55143	ENSG00000134690	CDCA8	cell division cycle associated 8	-0.424247	2.57978e-08
10733	542.135	545.694	572.259	344.573	298.954	340.538	440.692	-0.709734	0.0964392	-7.3594	1.84744e-13	4.325e-12	10733	ENSG00000142731	PLK4	polo like kinase 4	0.220247	0.059395
11082	34.6966	48.5781	38.5792	18.6521	17.9972	11.7427	28.3743	-0.709266	0.20403	-3.47628	0.000508427	0.00258653	11082	ENSG00000164283	ESM1	endothelial cell specific molecule 1	-0.204546	NA
5745	27.1067	32.3854	32.1494	10.7986	9.99845	10.6752	20.5189	-0.709041	0.204375	-3.46931	0.000521801	0.00264794	5745	ENSG00000160801	PTH1R	parathyroid hormone 1 receptor	1.32724	4.14935e-14	YES	YES
10158	8797.76	10569.8	9969.52	5943.15	6300.02	5496.64	7846.15	-0.708046	0.0635294	-11.1452	7.56013e-29	6.21661e-27	10158	ENSG00000162366	PDZK1IP1	PDZK1 interacting protein 1	-0.799647	5.57234e-09
114805	97.5843	80.1539	70.7286	41.2309	33.9947	49.1058	62.133	-0.707892	0.185625	-3.81357	0.000136974	0.000812893	114805	ENSG00000144278	GALNT13	polypeptide N-acetylgalactosaminyltransferase 13	-2.30581	5.86567e-18
1601	8296.83	7534.46	8018.05	4814.2	4661.28	5014.13	6389.82	-0.707556	0.0503415	-14.0551	7.16618e-45	1.33082e-42	1601	ENSG00000153071	DAB2	DAB adaptor protein 2	0.441231	5.8651e-05	YES
577	60.7191	48.5781	58.9405	24.5422	15.9975	34.1605	40.4897	-0.706012	0.199813	-3.53337	0.000410298	0.00213857	577	ENSG00000135298	ADGRB3	adhesion G protein-coupled receptor B3	-1.07567	2.23705e-07
6546	804.528	755.389	752.295	459.43	441.931	484.653	616.371	-0.705528	0.0841427	-8.38491	5.07665e-17	1.66482e-15	6546	ENSG00000183023	SLC8A1	solute carrier family 8 member A1	-0.171267	0.260108
652995	71.5618	56.6745	79.3018	26.5056	30.9952	41.6331	51.112	-0.704675	0.192996	-3.65124	0.000260979	0.00143721	652995	ENSG00000214049	UCA1	urothelial cancer associated 1	-1.09263	6.60134e-10
51554	32.5281	18.6216	31.0777	4.90845	9.99845	8.54013	17.6124	-0.704174	0.201371	-3.49691	0.000470688	0.00241676	51554	ENSG00000129048	ACKR4	atypical chemokine receptor 4	-0.0178949	NA
79071	1211.13	1131.06	1165.95	741.175	640.9	731.249	936.911	-0.704148	0.0763314	-9.22488	2.83878e-20	1.23798e-18	79071	ENSG00000170522	ELOVL6	ELOVL fatty acid elongase 6	-0.264897	0.0956645
55130	968.253	827.447	853.03	520.295	538.916	528.421	706.06	-0.704004	0.0840927	-8.37176	5.67625e-17	1.85409e-15	55130	ENSG00000169126	ARMC4	armadillo repeat containing 4	-0.176659	0.212958
26271	1197.03	1122.15	1177.74	697.981	667.896	744.059	934.477	-0.703999	0.0736293	-9.5614	1.16174e-21	5.71466e-20	26271	ENSG00000112029	FBXO5	F-box protein 5	0.306458	0.000118133
1718	21716.8	22112.8	22547.4	13295	13647.9	13668.5	17831.4	-0.702341	0.038994	-18.0115	1.58315e-72	6.54158e-70	1718	ENSG00000116133	DHCR24	24-dehydrocholesterol reductase	-0.481124	0.000205993	YES
23397	584.421	547.313	640.844	352.426	355.945	350.145	471.849	-0.698874	0.0950545	-7.35234	1.9476e-13	4.5466e-12	23397	ENSG00000121152	NCAPH	non-SMC condensin I complex subunit H	0.00175662	0.99043
701	695.017	670.378	770.513	449.614	431.933	399.251	569.451	-0.697409	0.0903883	-7.71569	1.20328e-14	3.23378e-13	701	ENSG00000156970	BUB1B	BUB1 mitotic checkpoint serine/threonine kinase B	0.300384	0.0178665
55388	712.365	670.378	692.283	390.712	426.934	431.277	553.991	-0.696848	0.0874576	-7.96784	1.61476e-15	4.707e-14	55388	ENSG00000065328	MCM10	minichromosome maintenance 10 replication initiation factor	0.658033	6.63485e-11
79019	1121.13	1080.86	1202.39	687.182	719.888	654.388	910.974	-0.69644	0.0755658	-9.21635	3.0739e-20	1.32306e-18	79019	ENSG00000100162	CENPM	centromere protein M	0.435438	0.00112457
135293	1127.64	999.899	1058.79	624.354	683.894	618.092	852.111	-0.696387	0.07847	-8.87456	7.02099e-19	2.77615e-17	135293	ENSG00000146281	PM20D2	peptidase M20 domain containing 2	-0.0913564	0.396406
389336	112.764	117.397	128.597	78.5351	52.9918	61.916	92.0336	-0.695775	0.168541	-4.12823	3.65573e-05	0.000249574	389336	ENSG00000178776	C5orf46	chromosome 5 open reading frame 46	-1.51535	4.05699e-07
2300	1038.73	1120.53	1122.01	699.944	669.896	623.43	879.091	-0.693319	0.0761041	-9.11013	8.22851e-20	3.43436e-18	2300	ENSG00000176678	FOXL1	forkhead box L1	-0.569823	1.44718e-06	YES	YES
440107	26.0225	27.5276	27.8628	8.8352	8.9986	8.54013	17.9645	-0.692521	0.203286	-3.40663	0.000657713	0.00325275	440107	ENSG00000187510	PLEKHG7	pleckstrin homology and RhoGEF domain containing G7	0.411305	0.233852
83540	339.376	290.659	318.279	175.722	167.974	212.436	250.741	-0.691428	0.123145	-5.61476	1.96841e-08	2.44431e-07	83540	ENSG00000143228	NUF2	NUF2 component of NDC80 kinetochore complex	0.652178	2.19828e-14
6272	6734.4	6409.07	6892.83	4059.28	3947.39	4307.43	5391.73	-0.691294	0.0503758	-13.7227	7.42184e-43	1.26462e-40	6272	ENSG00000134243	SORT1	sortilin 1	-0.296593	0.0188018	YES
9134	3059.81	2653.98	2652.32	1807.29	1561.76	1735.78	2245.16	-0.691022	0.0692562	-9.97776	1.90727e-23	1.09078e-21	9134	ENSG00000175305	CCNE2	cyclin E2	0.0500601	0.630349
4288	4090.95	3959.92	4259.79	2498.4	2513.61	2553.5	3312.7	-0.690962	0.0507022	-13.6278	2.73532e-42	4.47618e-40	4288	ENSG00000148773	MKI67	marker of proliferation Ki-67	0.138812	0.654765
8322	370.82	310.09	336.497	196.338	198.969	204.963	269.613	-0.690835	0.116455	-5.9322	2.98901e-09	4.17955e-08	8322	ENSG00000174804	FZD4	frizzled class receptor 4	-0.714557	0.00111047	YES
146909	438.045	474.446	500.459	291.562	292.954	260.474	376.323	-0.690507	0.103144	-6.69457	2.16302e-11	3.91571e-10	146909	ENSG00000186185	KIF18B	kinesin family member 18B	-0.189158	0.156789
57484	569.241	547.313	581.904	364.207	280.956	371.496	452.52	-0.689004	0.103815	-6.63685	3.20459e-11	5.67082e-10	57484	ENSG00000170153	RNF150	ring finger protein 150	-1.91092	2.03402e-12	YES	YES
148534	886.932	808.016	831.597	509.497	431.933	582.864	675.14	-0.687941	0.0946	-7.2721	3.53929e-13	7.94802e-12	148534	ENSG00000152078	TLCD4	TLC domain containing 4	0.373874	0.00108638
8418	97.5843	85.8213	76.0868	62.8281	25.996	38.4306	64.4578	-0.687681	0.19194	-3.58278	0.000339951	0.00181249	8418	ENSG00000168405	CMAHP	cytidine monophospho-N-acetylneuraminic acid hydroxylase, pseudogene	-0.3433	0.223605
3776	108.427	118.207	124.311	56.938	51.9919	81.1313	90.1676	-0.687327	0.171106	-4.01698	5.89499e-05	0.000381938	3776	ENSG00000082482	KCNK2	potassium two pore domain channel subfamily K member 2	0.602244	0.00607391
11240	702.607	741.626	726.576	412.309	473.926	431.277	581.387	-0.686915	0.0871256	-7.88419	3.16581e-15	8.89873e-14	11240	ENSG00000117115	PADI2	peptidyl arginine deiminase 2	-1.4917	1.58676e-10
10602	9721.56	8664.71	9327.6	5524.95	5575.13	5982.36	7466.05	-0.686121	0.0525418	-13.0586	5.67722e-39	8.15939e-37	10602	ENSG00000163171	CDC42EP3	CDC42 effector protein 3	-0.653987	6.03015e-08	YES	YES
113130	1725.07	1538.31	1659.98	992.488	962.85	1060.04	1323.12	-0.685691	0.0688727	-9.95592	2.37609e-23	1.35421e-21	113130	ENSG00000146670	CDCA5	cell division cycle associated 5	0.111552	0.220258
103695433	671.163	616.942	632.271	413.291	357.944	390.711	513.72	-0.685028	0.091789	-7.46307	8.45277e-14	2.05452e-12	103695433	NA	LINC01322	long intergenic non-protein coding RNA 1322	-0.56177	8.23168e-06
956	163.725	143.305	137.171	93.2605	78.9877	76.8612	115.552	-0.684788	0.1558	-4.3953	1.10619e-05	8.45722e-05	956	ENSG00000168032	ENTPD3	ectonucleoside triphosphate diphosphohydrolase 3	-0.478573	0.120232
9768	2529.6	2435.38	2510.87	1580.52	1522.76	1507.33	2014.41	-0.683268	0.0558804	-12.2273	2.2213e-34	2.51463e-32	9768	ENSG00000166803	PCLAF	PCNA clamp associated factor	0.393991	0.0124596
6582	101.921	127.113	113.594	65.7732	55.9913	66.186	88.4298	-0.683015	0.168192	-4.06093	4.88782e-05	0.000323532	6582	ENSG00000112499	SLC22A2	solute carrier family 22 member 2	-2.90848	9.63063e-26
51110	941.146	853.355	955.908	561.526	540.916	575.391	738.04	-0.682492	0.0805656	-8.47126	2.42754e-17	8.28975e-16	51110	ENSG00000147592	LACTB2	lactamase beta 2	0.166739	0.205507	YES	YES
5649	455.393	422.629	431.873	268.001	236.963	281.824	349.447	-0.682218	0.105638	-6.45809	1.06033e-10	1.781e-09	5649	ENSG00000189056	RELN	reelin	-2.181	1.87777e-13
11065	1184.02	1028.24	1169.17	655.768	737.885	671.468	907.758	-0.680846	0.0800566	-8.50455	1.82294e-17	6.30326e-16	11065	ENSG00000175063	UBE2C	ubiquitin conjugating enzyme E2 C	0.37915	0.000777469
55789	171.315	165.975	182.18	99.1506	98.9846	100.347	136.325	-0.68041	0.144804	-4.69883	2.61661e-06	2.25952e-05	55789	ENSG00000035499	DEPDC1B	DEP domain containing 1B	0.211312	0.0226337
9088	1619.9	1656.51	1631.04	954.202	1087.83	979.98	1321.58	-0.680246	0.0672456	-10.1158	4.69962e-24	2.83486e-22	9088	ENSG00000127564	PKMYT1	protein kinase, membrane associated tyrosine/threonine 1	0.0415873	0.822342
30012	392.506	373.242	374.004	206.155	259.96	214.571	303.406	-0.680145	0.113585	-5.988	2.12433e-09	3.03203e-08	30012	ENSG00000164438	TLX3	T cell leukemia homeobox 3	-0.600915	0.000400193
10395	7270.03	7071.35	6969.98	4266.42	4169.35	4760.06	5751.2	-0.679748	0.053547	-12.6944	6.35006e-37	8.26407e-35	10395	ENSG00000164741	DLC1	DLC1 Rho GTPase activating protein	-0.740001	1.90687e-13	YES
993	1068.01	1053.34	981.627	655.768	583.909	662.928	834.262	-0.679459	0.0785117	-8.65424	4.96216e-18	1.82661e-16	993	ENSG00000164045	CDC25A	cell division cycle 25A	-0.125754	0.272128	YES
9837	2067.7	1927.74	2020.05	1325.28	1179.82	1202.02	1620.44	-0.679373	0.0645344	-10.5273	6.46657e-26	4.43599e-24	9837	ENSG00000101003	GINS1	GINS complex subunit 1	0.0299331	0.899468
84955	1914.82	1749.62	1843.23	1228.09	1081.83	1078.19	1482.63	-0.679199	0.0686006	-9.90077	4.13102e-23	2.26836e-21	84955	ENSG00000120526	NUDCD1	NudC domain containing 1	0.0140367	0.91349	YES
81930	542.135	495.497	494.029	340.646	279.956	304.242	409.417	-0.678093	0.101844	-6.65816	2.77272e-11	4.95969e-10	81930	ENSG00000121621	KIF18A	kinesin family member 18A	0.520432	3.46806e-09
105370045	931.387	1049.29	1040.57	590.977	732.886	507.07	808.696	-0.6768	0.0994425	-6.80594	1.00393e-11	1.90286e-10	105370045	NA	NA	NA	-0.414457	0.253816
11080	1931.08	1836.25	1739.28	1188.83	1041.84	1167.86	1484.19	-0.67617	0.0686518	-9.84927	6.90451e-23	3.75387e-21	11080	ENSG00000162616	DNAJB4	DnaJ heat shock protein family (Hsp40) member B4	0.0309555	0.817184	YES	YES
57194	2153.36	2261.31	2359.76	1345.9	1461.77	1392.04	1829.02	-0.674113	0.0612461	-11.0066	3.55035e-28	2.78105e-26	57194	ENSG00000206190	ATP10A	ATPase phospholipid transporting 10A (putative)	-0.453953	0.000969415
26212	16.264	11.3349	19.2896	0	0.999845	3.20255	8.51516	-0.672483	0.177027	-3.79877	0.000145416	0.000855011	26212	ENSG00000124657	OR2B6	olfactory receptor family 2 subfamily B member 6	0.236647	0.422039
88455	3851.33	3519.48	3750.76	2393.36	2260.65	2261	3006.1	-0.672073	0.0547304	-12.2797	1.16417e-34	1.34556e-32	88455	ENSG00000076513	ANKRD13A	ankyrin repeat domain 13A	0.0590675	0.575537	YES
55607	595.264	670.378	605.48	404.456	333.948	403.521	502.174	-0.671798	0.0975665	-6.88554	5.75694e-12	1.12738e-10	55607	ENSG00000158528	PPP1R9A	protein phosphatase 1 regulatory subunit 9A	-0.903683	5.18839e-07
9833	1902.89	1783.63	1960.04	1130.91	1161.82	1208.43	1524.62	-0.671514	0.063788	-10.5273	6.46826e-26	4.43599e-24	9833	ENSG00000165304	MELK	maternal embryonic leucine zipper kinase	0.230963	0.00261814
79960	1833.5	1858.11	1875.38	1133.85	1168.82	1157.19	1504.47	-0.671315	0.0598429	-11.218	3.32892e-29	2.79292e-27	79960	ENSG00000077684	JADE1	jade family PHD finger 1	-0.0746543	0.457156	YES
24137	794.77	712.479	752.295	461.394	462.928	462.235	607.683	-0.671222	0.0845911	-7.93489	2.10678e-15	6.09822e-14	24137	ENSG00000090889	KIF4A	kinesin family member 4A	0.0190897	0.892781
2065	82.4045	72.0575	70.7286	36.3225	42.9933	37.3631	56.9782	-0.6702	0.185639	-3.61022	0.000305933	0.00165082	2065	ENSG00000065361	ERBB3	erb-b2 receptor tyrosine kinase 3	0.504355	0.0245085	YES
317762	1381.36	1320.51	1505.66	795.168	964.85	832.663	1133.37	-0.669977	0.0794005	-8.43795	3.22953e-17	1.0938e-15	317762	ENSG00000205476	CCDC85C	coiled-coil domain containing 85C	-0.239868	0.051748	YES	YES
84443	173.483	140.876	165.033	90.3154	88.9862	95.009	125.617	-0.669814	0.151303	-4.42697	9.55672e-06	7.41566e-05	84443	ENSG00000147234	FRMPD3	FERM and PDZ domain containing 3	-0.196272	0.490271
84251	521.534	421.82	479.026	265.056	282.956	311.715	380.351	-0.669464	0.107979	-6.19997	5.64739e-10	8.59484e-09	84251	ENSG00000118473	SGIP1	SH3GL interacting endocytic adaptor 1	-0.755502	0.00891444	YES	YES
327657	1059.33	1059	1015.92	676.384	646.899	614.89	845.404	-0.669185	0.0748041	-8.94582	3.69191e-19	1.48467e-17	327657	ENSG00000170054	SERPINA9	serpin family A member 9	-0.0152774	NA
122953	1888.8	1714.81	2015.77	1121.09	1218.81	1142.24	1516.92	-0.667949	0.0700638	-9.53344	1.52161e-21	7.44056e-20	122953	ENSG00000140044	JDP2	Jun dimerization protein 2	-0.193305	0.288875	YES	YES
7223	1454.01	1250.89	1326.7	762.772	851.868	877.499	1087.29	-0.667285	0.077352	-8.62661	6.31961e-18	2.28557e-16	7223	ENSG00000133107	TRPC4	transient receptor potential cation channel subfamily C member 4	0.66173	3.40138e-09
2113	8023.59	7719.87	7825.16	5026.25	4921.23	4815.57	6388.61	-0.666695	0.0438827	-15.1926	3.95624e-52	8.83631e-50	2113	ENSG00000134954	ETS1	ETS proto-oncogene 1, transcription factor	-0.441429	3.21339e-09	YES
147947	297.09	228.317	248.622	165.905	142.978	147.317	205.038	-0.666685	0.133071	-5.00999	5.44326e-07	5.29836e-06	147947	ENSG00000240225	ZNF542P	zinc finger protein 542, pseudogene	-2.18627	8.49203e-15
65997	162.64	162.737	152.174	84.4253	88.9862	102.482	125.574	-0.666552	0.150123	-4.44004	8.99439e-06	7.02881e-05	65997	ENSG00000128045	RASL11B	RAS like family 11 member B	-0.52459	0.0691901
254427	1236.07	1248.46	1201.31	743.139	813.873	734.451	996.217	-0.664229	0.0715401	-9.28471	1.6215e-20	7.20435e-19	254427	ENSG00000148426	PROSER2	proline and serine rich 2	0.0134967	0.918709
2152	800.191	724.623	749.08	489.863	388.94	515.611	611.385	-0.663382	0.0966483	-6.86388	6.70168e-12	1.30312e-10	2152	ENSG00000117525	F3	coagulation factor III, tissue factor	-2.01218	1.69759e-31	YES	YES
84886	3521.71	3215.06	3421.76	2083.14	2121.67	2156.38	2753.29	-0.662364	0.0544756	-12.1589	5.145e-34	5.70716e-32	84886	ENSG00000119280	C1orf198	chromosome 1 open reading frame 198	-0.284787	0.0293272	YES
10893	3516.29	3589.92	3641.45	2173.46	2269.65	2299.43	2915.03	-0.662256	0.0511663	-12.9432	2.56648e-38	3.62554e-36	10893	ENSG00000125966	MMP24	matrix metallopeptidase 24	0.68435	2.63428e-18
64105	1342.33	1191.78	1208.82	881.557	662.897	766.477	1008.98	-0.660809	0.0879967	-7.50948	5.93639e-14	1.47322e-12	64105	ENSG00000123219	CENPK	centromere protein K	0.579682	1.69492e-10
7083	5474.48	5545.19	5456.82	3342.65	3525.45	3492.91	4472.92	-0.660785	0.0464107	-14.2378	5.33965e-46	1.01441e-43	7083	ENSG00000167900	TK1	thymidine kinase 1	0.470167	4.8654e-10
8318	1269.68	1131.06	1183.1	752.955	759.882	717.371	969.007	-0.659584	0.0735688	-8.96553	3.08786e-19	1.25396e-17	8318	ENSG00000093009	CDC45	cell division cycle 45	0.535954	4.36012e-06
1286	266.73	309.281	278.628	167.869	171.973	176.14	228.437	-0.659117	0.122288	-5.38987	7.05069e-08	7.97631e-07	1286	ENSG00000081052	COL4A4	collagen type IV alpha 4 chain	-0.764293	0.00788958	YES	YES
6491	1085.35	988.564	1134.87	688.164	620.903	684.278	867.023	-0.658155	0.0794409	-8.28484	1.18268e-16	3.76635e-15	6491	ENSG00000123473	STIL	STIL centriolar assembly protein	-0.0947153	0.440872
891	1618.81	1412	1599.97	922.788	974.848	990.655	1253.18	-0.65796	0.0715534	-9.19536	3.7374e-20	1.59617e-18	891	ENSG00000134057	CCNB1	cyclin B1	0.113672	0.287696
4605	5229.43	5031.88	5491.11	3079.56	3456.46	3361.61	4275.01	-0.657622	0.0553811	-11.8745	1.60622e-32	1.68668e-30	4605	ENSG00000101057	MYBL2	MYB proto-oncogene like 2	0.330471	7.16524e-06
23761	3976.02	3984.21	3981.16	2439.5	2644.59	2432.87	3243.06	-0.656744	0.0518444	-12.6676	8.9411e-37	1.15452e-34	23761	ENSG00000241878	PISD	phosphatidylserine decarboxylase	-0.173406	0.107023	YES
1489	187.579	193.503	196.111	105.041	122.981	113.157	153.062	-0.656337	0.139828	-4.69388	2.68075e-06	2.31371e-05	1489	ENSG00000150281	CTF1	cardiotrophin 1	-0.400412	0.257713
115701	3793.86	3384.27	3696.11	2401.21	2066.68	2361.35	2950.58	-0.6535	0.0642047	-10.1784	2.4764e-24	1.52723e-22	115701	ENSG00000198796	ALPK2	alpha kinase 2	-0.417312	0.000796281
2762	687.427	659.853	646.202	422.126	428.933	386.441	538.497	-0.65313	0.0883131	-7.39562	1.40745e-13	3.33751e-12	2762	ENSG00000112699	GMDS	GDP-mannose 4,6-dehydratase	-0.212821	0.135719	YES	YES
64757	48.7921	48.5781	50.3673	24.5422	18.997	26.6879	36.3275	-0.652217	0.199471	-3.26973	0.00107649	0.00501895	64757	ENSG00000186205	MTARC1	mitochondrial amidoxime reducing component 1	-0.620083	0.0024299
220042	425.034	396.721	473.667	287.635	234.963	269.014	347.839	-0.651819	0.11054	-5.89669	3.70874e-09	5.13814e-08	220042	ENSG00000165490	DDIAS	DNA damage induced apoptosis suppressor	0.433474	0.00106184
1305	157.219	168.404	163.962	100.132	101.984	84.3338	129.339	-0.651683	0.148648	-4.38407	1.16483e-05	8.87616e-05	1305	ENSG00000197467	COL13A1	collagen type XIII alpha 1 chain	-0.329951	0.106711
29091	37.9494	41.2914	33.221	18.6521	11.9981	17.0803	26.6987	-0.65151	0.204233	-3.19003	0.00142257	0.00641612	29091	ENSG00000168952	STXBP6	syntaxin binding protein 6	0.548431	0.0309196
3075	4239.49	4380.13	4124.76	2942.12	2466.62	2619.69	3462.13	-0.651477	0.0613564	-10.6179	2.45974e-26	1.72999e-24	3075	ENSG00000000971	CFH	complement factor H	-0.879877	0.000182209
3569	16347.5	16692.2	16486.2	10987.1	10638.3	9708	13476.6	-0.650979	0.0485077	-13.4201	4.60928e-41	7.24571e-39	3569	ENSG00000136244	IL6	interleukin 6	-2.27094	5.26481e-104
10635	680.921	621.8	624.769	425.071	385.94	385.373	520.646	-0.650712	0.0907291	-7.17203	7.38935e-13	1.59649e-11	10635	ENSG00000111247	RAD51AP1	RAD51 associated protein 1	0.521364	8.93585e-11
79098	181.073	131.161	148.959	96.2055	78.9877	89.6714	121.01	-0.650192	0.157563	-4.12654	3.68262e-05	0.00025105	79098	ENSG00000182795	C1orf116	chromosome 1 open reading frame 116	-1.24653	1.86121e-06
81491	75.8989	53.4359	58.9405	34.3591	27.9956	32.0255	47.1093	-0.650083	0.193901	-3.35266	0.00080039	0.00385793	81491	ENSG00000112218	GPR63	G protein-coupled receptor 63	-0.285145	0.212726
51512	1066.92	977.229	1073.79	662.64	638.901	651.185	845.111	-0.649367	0.0756472	-8.58415	9.15116e-18	3.26675e-16	51512	ENSG00000075218	GTSE1	G2 and S-phase expressed 1	0.0942965	0.375605
1002	156.135	153.831	155.389	95.2238	76.988	99.279	122.807	-0.649179	0.151992	-4.27113	1.94482e-05	0.000142104	1002	ENSG00000179242	CDH4	cadherin 4	-1.48868	8.64861e-09
7430	19381.3	18351.2	18624.1	11659.5	11994.1	12113.1	15353.9	-0.649141	0.0412739	-15.7277	9.77617e-56	2.44819e-53	7430	ENSG00000092820	EZR	ezrin	-0.263679	0.00325027	YES	YES
81792	7472.79	7383.87	7437.22	4826.96	4535.29	4777.14	6072.21	-0.64891	0.044813	-14.4804	1.6115e-47	3.20903e-45	81792	ENSG00000151388	ADAMTS12	ADAM metallopeptidase with thrombospondin type 1 motif 12	-0.625105	2.51768e-08
9760	252.635	251.796	257.195	165.905	130.98	162.263	203.462	-0.648167	0.129191	-5.01711	5.24556e-07	5.13009e-06	9760	ENSG00000198846	TOX	thymocyte selection associated high mobility group box	-1.61735	3.53191e-17
55103	2258.53	2275.88	2140.08	1475.48	1206.81	1516.94	1812.29	-0.64656	0.0740126	-8.73581	2.41915e-18	9.19166e-17	55103	ENSG00000116191	RALGPS2	Ral GEF with PH domain and SH3 binding motif 2	0.256124	0.00695893
5999	495.511	380.528	441.518	250.331	276.957	279.689	354.089	-0.645953	0.112301	-5.75198	8.82037e-09	1.16347e-07	5999	ENSG00000117152	RGS4	regulator of G protein signaling 4	-0.956067	0.000676841
79075	502.017	450.967	529.393	298.433	325.949	291.432	399.699	-0.645179	0.102216	-6.3119	2.75633e-10	4.4144e-09	79075	ENSG00000136982	DSCC1	DNA replication and sister chromatid cohesion 1	0.599911	2.37598e-07
100133941	5580.73	4962.25	4971.36	3267.06	3194.5	3378.69	4225.77	-0.644141	0.0555924	-11.5869	4.80459e-31	4.53773e-29	100133941	ENSG00000272398	CD24	CD24 molecule	0.721177	2.33316e-16
6876	46115.1	41835.5	44583.7	26989.6	29185.5	28226.2	36155.9	-0.642282	0.0468976	-13.6954	1.08143e-42	1.82387e-40	6876	ENSG00000149591	TAGLN	transgelin	0.189595	0.250256	YES	YES
5983	1190.53	1081.67	1115.58	753.937	662.897	716.304	920.154	-0.642085	0.0762509	-8.42068	3.74303e-17	1.25232e-15	5983	ENSG00000133119	RFC3	replication factor C subunit 3	0.470363	2.36223e-06
57158	447.803	452.586	435.088	260.148	309.952	257.271	360.475	-0.641448	0.1053	-6.09162	1.11776e-09	1.65393e-08	57158	ENSG00000149596	JPH2	junctophilin 2	-0.443856	0.0535198
23508	770.916	749.722	783.373	458.449	539.916	444.087	624.41	-0.64104	0.0886137	-7.2341	4.68628e-13	1.03688e-11	23508	ENSG00000133985	TTC9	tetratricopeptide repeat domain 9	-0.300737	0.317443
79094	1116.8	1192.59	1165.95	707.798	744.884	746.194	945.703	-0.640751	0.0715319	-8.95756	3.31946e-19	1.34142e-17	79094	ENSG00000128965	CHAC1	ChaC glutathione specific gamma-glutamylcyclotransferase 1	-0.276288	0.0671165
1318	572.494	578.889	599.05	373.042	371.942	350.145	474.26	-0.640385	0.0911669	-7.02432	2.15114e-12	4.40571e-11	1318	ENSG00000136867	SLC31A2	solute carrier family 31 member 2	-0.100515	0.63679	YES	YES
131368	69.3932	88.2502	78.2301	42.2126	49.9922	34.1605	60.3732	-0.640176	0.185546	-3.45022	0.000560126	0.00282249	131368	ENSG00000170044	ZPLD1	zona pellucida like domain containing 1	-0.195776	NA
166614	403.348	341.666	285.058	219.898	210.967	196.423	276.227	-0.639893	0.125036	-5.11766	3.09343e-07	3.15023e-06	166614	ENSG00000170390	DCLK2	doublecortin like kinase 2	-0.610803	9.73805e-07
60494	46.6236	46.1492	56.7972	18.6521	16.9974	34.1605	36.5633	-0.639163	0.201727	-3.16846	0.0015325	0.00683464	60494	ENSG00000149201	CCDC81	coiled-coil domain containing 81	0.152086	0.717132
79754	297.09	307.661	318.279	183.576	200.969	182.545	248.353	-0.639091	0.117224	-5.45187	4.98422e-08	5.80953e-07	79754	ENSG00000196372	ASB13	ankyrin repeat and SOCS box containing 13	0.62825	4.38806e-08	YES	YES
55332	9268.34	8983.71	8883.94	5882.28	5496.15	5945	7409.9	-0.639061	0.046415	-13.7684	3.9487e-43	6.86991e-41	55332	ENSG00000136048	DRAM1	DNA damage regulated autophagy modulator 1	-0.418817	0.000301334
29995	3788.44	4010.93	3974.73	2538.65	2486.61	2489.45	3214.8	-0.638331	0.0501041	-12.7401	3.53957e-37	4.75591e-35	29995	ENSG00000071282	LMCD1	LIM and cysteine rich domains 1	-0.660994	6.2301e-15
586	5230.52	5188.14	5042.09	3406.46	2907.55	3516.4	4215.19	-0.638208	0.0619698	-10.2987	7.14245e-25	4.61135e-23	586	ENSG00000060982	BCAT1	branched chain amino acid transaminase 1	-0.467727	0.00094323
155185	1791.21	1752.86	1856.09	1139.74	1171.82	1120.89	1472.1	-0.637777	0.0615531	-10.3614	3.71429e-25	2.45559e-23	155185	ENSG00000174945	AMZ1	archaelysin family metallopeptidase 1	-1.10034	2.32554e-19
3832	1194.86	1182.07	1189.53	807.93	697.891	753.667	970.991	-0.636149	0.0735603	-8.648	5.24093e-18	1.92494e-16	3832	ENSG00000138160	KIF11	kinesin family member 11	0.688552	4.75192e-13
440	3289.67	2891.21	3234.23	1802.38	1973.69	2199.08	2565.04	-0.635757	0.070199	-9.0565	1.34708e-19	5.5941e-18	440	ENSG00000070669	ASNS	asparagine synthetase (glutamine-hydrolyzing)	0.0289162	0.825464
51514	3311.36	2896.87	2980.25	1911.35	1927.7	2014.4	2506.99	-0.635303	0.0605474	-10.4926	9.33814e-26	6.32544e-24	51514	ENSG00000143476	DTL	denticleless E3 ubiquitin protein ligase homolog	0.246797	0.0144438
30818	338.292	323.854	306.491	182.594	204.968	210.301	261.083	-0.635085	0.116485	-5.45209	4.97805e-08	5.80644e-07	30818	ENSG00000115041	KCNIP3	potassium voltage-gated channel interacting protein 3	0.224549	0.182713
2305	1665.44	1498.63	1608.54	1031.76	993.845	1009.87	1301.35	-0.633598	0.0664725	-9.53173	1.54685e-21	7.54169e-20	2305	ENSG00000111206	FOXM1	forkhead box M1	-0.0373146	0.803166
23594	1030.06	956.989	953.765	619.446	632.902	611.687	800.807	-0.633337	0.0759523	-8.33862	7.51612e-17	2.4263e-15	23594	ENSG00000091651	ORC6	origin recognition complex subunit 6	0.210539	0.0519473
51232	17774.4	17042.8	17377.8	11215.8	10539.4	11714.9	14277.5	-0.632648	0.0465003	-13.6053	3.72669e-42	5.98007e-40	51232	ENSG00000150938	CRIM1	cysteine rich transmembrane BMP regulator 1	-0.804902	2.87579e-09	YES	YES
79974	520.449	494.687	500.459	375.987	266.958	297.837	409.396	-0.632248	0.11029	-5.73258	9.89137e-09	1.29441e-07	79974	ENSG00000106034	CPED1	cadherin like and PC-esterase domain containing 1	-1.51015	8.7943e-16
221662	258.056	192.693	206.828	135.473	117.982	140.912	175.324	-0.63218	0.141327	-4.47318	7.70653e-06	6.10904e-05	221662	ENSG00000112183	RBM24	RNA binding motif protein 24	0.549524	2.66273e-05
9700	491.174	519.786	576.545	340.646	337.947	315.985	430.347	-0.631841	0.0985717	-6.40996	1.45555e-10	2.40159e-09	9700	ENSG00000135476	ESPL1	extra spindle pole bodies like 1, separase	0.228815	0.0363923
83699	1098.36	1072.77	1050.21	679.329	640.9	726.979	878.092	-0.63179	0.0750813	-8.41474	3.93778e-17	1.31482e-15	83699	ENSG00000198478	SH3BGRL2	SH3 domain binding glutamate rich protein like 2	-0.205879	0.285447	YES	YES
116535	28.191	46.9588	37.5076	13.7436	21.9966	11.7427	26.6901	-0.630478	0.204628	-3.0811	0.00206238	0.00879438	116535	ENSG00000172935	MRGPRF	MAS related GPR family member F	-0.557614	0.0953753	YES	YES
644524	627.792	592.653	641.916	385.804	407.937	380.036	506.023	-0.630251	0.0899653	-7.00549	2.46122e-12	5.00357e-11	644524	ENSG00000125816	NKX2-4	NK2 homeobox 4	0.118409	0.565239
55723	4713.32	4778.47	4648.8	2876.35	3174.51	3025.34	3869.46	-0.629865	0.0509868	-12.3535	4.66412e-35	5.42877e-33	55723	ENSG00000105011	ASF1B	anti-silencing function 1B histone chaperone	0.157587	0.0864644
10125	465.152	447.728	408.297	292.543	276.957	256.204	357.814	-0.629739	0.104837	-6.00685	1.89167e-09	2.71638e-08	10125	ENSG00000172575	RASGRP1	RAS guanyl releasing protein 1	0.0125878	0.965945
23086	260.225	224.269	267.911	152.162	148.977	157.992	201.923	-0.62966	0.128886	-4.88542	1.0321e-06	9.53127e-06	23086	ENSG00000110723	EXPH5	exophilin 5	-0.304445	0.146148
389136	1818.32	1539.12	1635.33	1053.35	960.851	1158.26	1360.87	-0.628909	0.0778576	-8.07768	6.6011e-16	1.99093e-14	389136	ENSG00000206538	VGLL3	vestigial like family member 3	-0.82771	8.34592e-07	YES	YES
3655	3443.64	3161.62	3531.07	2109.65	2058.68	2318.65	2770.55	-0.628685	0.0612311	-10.2674	9.88105e-25	6.33e-23	3655	ENSG00000091409	ITGA6	integrin subunit alpha 6	-0.648483	1.96061e-09	YES
4311	2088.3	2050	2053.27	1335.1	1258.8	1372.83	1693.05	-0.628499	0.0597249	-10.5232	6.75088e-26	4.61069e-24	4311	ENSG00000196549	MME	membrane metalloendopeptidase	-0.214705	0.105576	YES	YES
9971	146.376	131.161	117.881	63.8098	89.986	75.7937	104.168	-0.628212	0.163215	-3.84897	0.000118613	0.000717195	9971	ENSG00000012504	NR1H4	nuclear receptor subfamily 1 group H member 4	-0.0148301	NA
29128	4427.07	4398.75	4369.1	2741.86	3047.53	2679.47	3610.63	-0.627759	0.0550216	-11.4093	3.7563e-30	3.43006e-28	29128	ENSG00000276043	UHRF1	ubiquitin like with PHD and ring finger domains 1	-0.377879	0.00169893
319089	98.6685	102.824	111.451	41.2309	74.9883	58.7134	81.3127	-0.627454	0.177588	-3.53319	0.000410571	0.00213932	319089	ENSG00000139865	TTC6	tetratricopeptide repeat domain 6	-0.409537	0.140423
399949	40.118	28.3372	37.5076	12.762	13.9978	18.1478	25.1451	-0.625349	0.204583	-3.0567	0.00223786	0.00945725	399949	ENSG00000183644	HOATZ	HOATZ cilia and flagella associated protein	-0.314291	NA
9758	49.8764	43.7203	57.8689	28.469	19.9969	25.6204	37.592	-0.624303	0.199405	-3.13084	0.00174308	0.00762323	9758	ENSG00000169933	FRMPD4	FERM and PDZ domain containing 4	-0.968713	0.00240534
646	2275.88	2318.79	2327.61	1453.88	1487.77	1512.67	1896.1	-0.624267	0.0559698	-11.1536	6.87312e-29	5.67995e-27	646	ENSG00000169594	BNC1	basonuclin 1	-0.237019	0.0182165
9265	1969.03	1803.06	1918.25	1189.81	1232.81	1228.71	1556.94	-0.623867	0.0621792	-10.0334	1.08748e-23	6.35122e-22	9265	ENSG00000008256	CYTH3	cytohesin 3	0.20711	0.0271511	YES
4037	491.174	547.313	513.318	304.324	358.944	315.985	421.843	-0.623586	0.0999544	-6.2387	4.41224e-10	6.7964e-09	4037	ENSG00000130881	LRP3	LDL receptor related protein 3	0.960759	1.56555e-05
100130967	31.4438	46.1492	60.0122	21.5972	19.9969	22.4178	33.6028	-0.623076	0.202712	-3.0737	0.00211423	0.00899461	100130967	ENSG00000203711	C6orf99	chromosome 6 putative open reading frame 99	0.564591	0.0146938
63967	2619.59	2445.1	2686.62	1703.23	1652.74	1626.9	2122.36	-0.622998	0.0582508	-10.6951	1.07301e-26	7.7784e-25	63967	ENSG00000092853	CLSPN	claspin	-0.541394	0.000572447
84057	148.545	96.3466	146.815	74.6084	77.9879	71.5236	102.638	-0.622449	0.168752	-3.68854	0.000225548	0.00126626	84057	ENSG00000121211	MND1	meiotic nuclear divisions 1	0.320025	0.114246
10560	730.798	677.664	654.776	460.412	436.932	413.129	562.285	-0.621358	0.0884905	-7.02175	2.19105e-12	4.48188e-11	10560	ENSG00000117479	SLC19A2	solute carrier family 19 member 2	-0.144249	0.285447
79022	4602.72	4317.78	4398.03	2914.63	2834.56	2850.27	3653	-0.621287	0.0493064	-12.6005	2.09708e-36	2.58661e-34	79022	ENSG00000134291	TMEM106C	transmembrane protein 106C	0.343035	0.000668839	YES
79627	19535.3	18345.5	18513.8	12158.2	11236.3	13004.5	15465.6	-0.621094	0.052509	-11.8283	2.78593e-32	2.84234e-30	79627	ENSG00000119900	OGFRL1	opioid growth factor receptor like 1	-0.450493	6.7018e-06	YES
6617	2352.86	2168.2	2223.66	1470.57	1489.77	1380.3	1847.56	-0.620455	0.060516	-10.2527	1.15024e-24	7.3402e-23	6617	ENSG00000023608	SNAPC1	small nuclear RNA activating complex polypeptide 1	-0.0048063	0.971039	YES
56648	1541.83	1334.28	1402.78	915.916	895.861	933.009	1170.61	-0.618959	0.0714099	-8.6677	4.40955e-18	1.63411e-16	56648	ENSG00000163577	EIF5A2	eukaryotic translation initiation factor 5A2	0.0713205	0.685174
121512	484.668	482.542	436.16	299.415	270.958	317.052	381.799	-0.618095	0.102816	-6.01166	1.8363e-09	2.64376e-08	121512	ENSG00000139132	FGD4	FYVE, RhoGEF and PH domain containing 4	-0.116321	0.551724	YES
6579	59.6348	51.8166	50.3673	25.5239	24.9961	32.0255	40.7274	-0.616302	0.196747	-3.13246	0.00173349	0.00758971	6579	ENSG00000084453	SLCO1A2	solute carrier organic anion transporter family member 1A2	-0.0740791	NA
56852	1309.8	1138.35	1329.91	831.491	787.877	802.772	1033.37	-0.615958	0.0761252	-8.09138	5.89946e-16	1.78256e-14	56852	ENSG00000070950	RAD18	RAD18 E3 ubiquitin protein ligase	0.270758	0.00482471
54962	625.623	586.985	632.271	420.163	365.943	387.509	503.082	-0.615956	0.0919725	-6.69717	2.12488e-11	3.85088e-10	54962	ENSG00000075131	TIPIN	TIMELESS interacting protein	0.0386076	0.799916
5357	917.292	908.41	893.753	595.885	575.91	574.324	744.262	-0.61594	0.0763193	-8.07056	6.99747e-16	2.09899e-14	5357	ENSG00000120756	PLS1	plastin 1	0.239466	0.0367842
103021165	44.455	63.9612	49.2957	18.6521	27.9956	32.0255	39.3975	-0.61417	0.199775	-3.07431	0.00210988	0.00897838	103021165	NA	CASC19	cancer susceptibility 19	NA	NA
7070	9216.29	9985.23	9802.34	6331.89	6327.02	6220.42	7980.53	-0.612	0.0453535	-13.494	1.69644e-41	2.69604e-39	7070	ENSG00000154096	THY1	Thy-1 cell surface antigen	0.0659422	0.536424
728116	21.6854	21.8601	27.8628	9.81689	6.99891	7.47262	15.9495	-0.61158	0.201279	-3.03847	0.00237785	0.00996982	728116	ENSG00000273274	ZBTB8B	zinc finger and BTB domain containing 8B	-0.277346	0.469537
57630	2482.98	2177.92	2240.81	1442.1	1440.78	1580.99	1894.26	-0.611465	0.0657247	-9.30344	1.3598e-20	6.09072e-19	57630	ENSG00000154447	SH3RF1	SH3 domain containing ring finger 1	-0.921663	1.07286e-09	YES
27346	2633.69	2507.44	2510.87	1641.38	1667.74	1661.06	2103.7	-0.610705	0.0549961	-11.1045	1.19257e-28	9.70973e-27	27346	ENSG00000109084	TMEM97	transmembrane protein 97	0.206383	0.0254926
79000	222.275	174.072	167.177	113.876	117.982	109.954	150.889	-0.61039	0.145905	-4.18347	2.87091e-05	0.000201146	79000	ENSG00000127423	AUNIP	aurora kinase A and ninein interacting protein	0.0453292	0.818799
79933	20.6011	17.812	31.0777	2.94507	6.99891	10.6752	15.0183	-0.609961	0.197218	-3.09282	0.00198264	0.00851808	79933	ENSG00000166317	SYNPO2L	synaptopodin 2 like	0.507813	0.133499
4502	30963.5	26187.6	30066.1	16145.8	21064.7	17222.2	23608.3	-0.609688	0.124701	-4.88922	1.01236e-06	9.37382e-06	4502	ENSG00000125148	MT2A	metallothionein 2A	-0.996553	0.000146614
10403	412.022	382.148	383.649	261.129	248.961	235.921	320.639	-0.608609	0.106822	-5.69743	1.21628e-08	1.56684e-07	10403	ENSG00000080986	NDC80	NDC80 kinetochore complex component	0.31934	6.77545e-05
92935	396.843	438.013	417.942	256.221	261.959	279.689	341.778	-0.607684	0.104541	-5.81286	6.14126e-09	8.23886e-08	92935	ENSG00000247626	MARS2	methionyl-tRNA synthetase 2, mitochondrial	-0.654697	5.4026e-05
2841	27.1067	32.3854	32.1494	9.81689	11.9981	16.0127	21.5782	-0.606919	0.204546	-2.96715	0.0030057	0.012227	2841	ENSG00000125245	GPR18	G protein-coupled receptor 18	0.0236211	NA
22936	6620.55	5747.6	6172.68	4010.2	3805.41	4250.85	5101.21	-0.606398	0.0584219	-10.3796	3.06961e-25	2.06238e-23	22936	ENSG00000118985	ELL2	elongation factor for RNA polymerase II 2	-0.142875	0.106196	YES
147841	448.888	395.102	408.297	280.763	260.959	253.001	341.168	-0.605948	0.106045	-5.71404	1.10327e-08	1.43243e-07	147841	ENSG00000161888	SPC24	SPC24 component of NDC80 kinetochore complex	0.296179	0.0802393
10460	2256.36	2298.55	2487.29	1468.61	1565.76	1550.03	1937.77	-0.605204	0.0605987	-9.98707	1.73637e-23	9.99953e-22	10460	ENSG00000013810	TACC3	transforming acidic coiled-coil containing protein 3	-0.306589	0.000175941
4983	1960.36	1790.1	1964.33	1209.44	1206.81	1298.1	1571.52	-0.604798	0.0645431	-9.37045	7.22253e-21	3.30676e-19	4983	ENSG00000079482	OPHN1	oligophrenin 1	-0.719686	1.78475e-05
29941	781.758	850.117	894.824	551.709	574.911	501.733	692.509	-0.604794	0.0850162	-7.11387	1.12835e-12	2.37269e-11	29941	ENSG00000160447	PKN3	protein kinase N3	0.0954274	0.398762
113115	150.713	136.828	137.171	87.3703	79.9876	88.6039	113.446	-0.604512	0.154015	-3.92503	8.67205e-05	0.000541283	113115	ENSG00000146410	MTFR2	mitochondrial fission regulator 2	0.498964	0.000172841
27132	914.039	999.09	1103.8	679.329	675.895	588.202	826.725	-0.604483	0.085653	-7.05736	1.697e-12	3.51921e-11	27132	ENSG00000178773	CPNE7	copine 7	-0.77711	2.68685e-07
22999	184.326	147.354	142.529	101.114	86.9865	98.2115	126.753	-0.602755	0.153177	-3.93501	8.31927e-05	0.000521034	22999	ENSG00000079841	RIMS1	regulating synaptic membrane exocytosis 1	-1.03682	6.8321e-06
6536	40.118	46.1492	53.5823	17.6704	30.9952	19.2153	34.6217	-0.601275	0.201901	-2.97807	0.00290068	0.0118435	6536	ENSG00000196517	SLC6A9	solute carrier family 6 member 9	-0.0755824	0.814376
116328	42.2865	29.9565	20.3613	7.85351	6.99891	19.2153	21.112	-0.600324	0.202407	-2.96593	0.00301774	0.0122699	116328	ENSG00000165084	C8orf34	chromosome 8 open reading frame 34	-0.611052	0.0377603
898	1560.26	1475.15	1581.75	983.652	1037.84	987.453	1271.02	-0.600308	0.0654632	-9.17016	4.72331e-20	2.00171e-18	898	ENSG00000105173	CCNE1	cyclin E1	0.00982597	0.964129
5347	533.461	608.846	611.91	353.408	371.942	404.589	480.692	-0.599705	0.0960451	-6.24399	4.26539e-10	6.60097e-09	5347	ENSG00000166851	PLK1	polo like kinase 1	0.0573415	0.623151
4327	63.9719	89.0599	85.7317	48.1028	34.9946	50.1733	62.0057	-0.599009	0.185989	-3.22067	0.0012789	0.00583109	4327	ENSG00000123342	MMP19	matrix metallopeptidase 19	0.609438	0.00728778
56256	343.713	300.375	357.93	218.917	207.968	207.098	272.667	-0.598385	0.116043	-5.15659	2.51491e-07	2.5882e-06	56256	ENSG00000082497	SERTAD4	SERTA domain containing 4	0.0150216	0.952396	YES
65061	234.202	221.84	262.553	138.418	155.976	154.79	194.63	-0.597838	0.130632	-4.57651	4.72797e-06	3.91699e-05	65061	ENSG00000138395	CDK15	cyclin dependent kinase 15	0.774083	3.17744e-16
64318	1302.21	1177.21	1240.97	887.447	715.889	811.313	1022.51	-0.597452	0.080187	-7.45072	9.28291e-14	2.23656e-12	64318	ENSG00000173145	NOC3L	NOC3 like DNA replication regulator	0.225835	0.0131845	YES
100128191	252.635	233.175	242.192	150.198	128.98	176.14	197.22	-0.59618	0.132928	-4.48497	7.29256e-06	5.80875e-05	100128191	ENSG00000257167	TMPO-AS1	TMPO antisense RNA 1	0.181111	0.120976
57823	2490.57	2436.19	2391.91	1609.97	1589.75	1604.48	2020.48	-0.596109	0.0548882	-10.8604	1.77919e-27	1.34892e-25	57823	ENSG00000026751	SLAMF7	SLAM family member 7	-0.422701	0.101931
401409	34.6966	20.2409	35.3643	8.8352	13.9978	12.8102	20.9908	-0.594792	0.203936	-2.91656	0.0035391	0.0140747	401409	ENSG00000146955	RAB19	RAB19, member RAS oncogene family	0.0652902	0.88397
3148	2557.79	2370.61	2428.35	1649.24	1566.76	1611.95	2030.78	-0.594597	0.0575506	-10.3317	5.06434e-25	3.30843e-23	3148	ENSG00000164104	HMGB2	high mobility group box 2	0.180866	0.0642212
57089	4890.06	4597.11	4656.3	3202.27	2911.55	3184.4	3906.95	-0.594442	0.0532217	-11.1692	5.7726e-29	4.79445e-27	57089	ENSG00000198018	ENTPD7	ectonucleoside triphosphate diphosphohydrolase 7	-0.608099	1.67759e-07	YES
120114	820.792	798.3	805.878	559.563	493.923	526.286	667.457	-0.591869	0.081815	-7.23423	4.68167e-13	1.03688e-11	120114	ENSG00000165323	FAT3	FAT atypical cadherin 3	-0.670799	0.00940767
10100	598.517	513.309	530.465	342.609	342.947	374.698	450.424	-0.591691	0.097626	-6.06079	1.35455e-09	1.98125e-08	10100	ENSG00000134198	TSPAN2	tetraspanin 2	-0.259334	0.15718	YES	YES
79762	304.68	279.324	276.485	165.905	204.968	174.005	234.228	-0.591456	0.123291	-4.79725	1.60856e-06	1.44255e-05	79762	ENSG00000162817	C1orf115	chromosome 1 open reading frame 115	0.0733312	0.806213	YES
10186	947.652	965.085	946.263	589.995	608.905	670.4	788.05	-0.591334	0.0777036	-7.61013	2.73814e-14	7.07124e-13	10186	ENSG00000183722	LHFPL6	LHFPL tetraspan subfamily member 6	-0.13247	0.480204
137994	297.09	241.271	243.264	170.814	163.974	156.925	212.223	-0.591132	0.128596	-4.5968	4.29028e-06	3.57949e-05	137994	ENSG00000165046	LETM2	leucine zipper and EF-hand containing transmembrane protein 2	0.411435	0.0284606
10178	33.6124	42.101	37.5076	14.7253	15.9975	22.4178	27.7269	-0.590511	0.20393	-2.89565	0.00378371	0.0149417	10178	ENSG00000009694	TENM1	teneurin transmembrane protein 1	-0.420955	NA
83894	110.595	100.395	101.806	53.9929	74.9883	54.4433	82.7035	-0.59043	0.172175	-3.42924	0.000605284	0.00301511	83894	ENSG00000137473	TTC29	tetratricopeptide repeat domain 29	0.224208	0.485872
26050	866.331	808.825	848.743	574.288	529.918	543.366	695.245	-0.589232	0.080138	-7.35271	1.94225e-13	4.54052e-12	26050	ENSG00000165300	SLITRK5	SLIT and NTRK like family member 5	0.193918	0.280326
135932	693.932	621.8	748.009	397.584	488.924	448.357	566.434	-0.589071	0.0968425	-6.08277	1.18122e-09	1.73849e-08	135932	ENSG00000178826	TMEM139	transmembrane protein 139	0.236897	0.0889344
93663	1568.94	1497.02	1485.3	1025.87	925.856	1039.76	1257.12	-0.58811	0.0680426	-8.64327	5.4628e-18	1.99755e-16	93663	ENSG00000146376	ARHGAP18	Rho GTPase activating protein 18	-0.395568	3.41167e-05	YES
9284	20.6011	43.7203	78.2301	10.7986	32.9949	9.60765	32.6588	-0.58775	0.202395	-2.90398	0.00368455	0.0145864	9284	ENSG00000183426	NPIPA1	nuclear pore complex interacting protein family member A1	-0.0161283	0.9725
338761	214.685	224.269	216.472	117.803	158.975	134.507	177.785	-0.587345	0.136629	-4.29884	1.71693e-05	0.000126685	338761	ENSG00000186897	C1QL4	complement C1q like 4	0.765377	7.808e-19
4254	2385.39	2228.93	2231.17	1530.45	1355.79	1618.36	1891.68	-0.587028	0.0671931	-8.73643	2.40585e-18	9.16217e-17	4254	ENSG00000049130	KITLG	KIT ligand	-0.136311	0.241514
89795	533.461	450.157	468.309	338.683	290.955	306.377	397.99	-0.586704	0.104064	-5.6379	1.72137e-08	2.15275e-07	89795	ENSG00000067798	NAV3	neuron navigator 3	-1.67918	5.42598e-20
51334	241.792	213.744	214.329	114.858	139.978	164.398	181.516	-0.586496	0.139215	-4.21287	2.52142e-05	0.000178628	51334	ENSG00000184838	PRR16	proline rich 16	-0.242207	0.322005
286151	49.8764	43.7203	47.1524	23.5605	23.9963	24.5529	35.4765	-0.585124	0.199465	-2.93348	0.00335189	0.0134303	286151	ENSG00000156509	FBXO43	F-box protein 43	0.106694	0.725526
89958	475.994	461.492	404.01	268.983	343.947	246.596	366.837	-0.585113	0.116194	-5.03567	4.76182e-07	4.68194e-06	89958	ENSG00000186193	SAPCD2	suppressor APC domain containing 2	-0.0984907	0.383747
2297	8539.71	7383.06	8297.75	4950.66	5723.11	5316.23	6701.75	-0.584844	0.0613341	-9.53539	1.49326e-21	7.32362e-20	2297	ENSG00000251493	FOXD1	forkhead box D1	-0.290816	0.00274533	YES	YES
222865	47.7079	46.9588	46.0808	20.6155	26.9958	24.5529	35.4853	-0.584706	0.19965	-2.92865	0.00340433	0.0136173	222865	ENSG00000166448	TMEM130	transmembrane protein 130	-0.322374	0.385499
128239	1573.27	1428.2	1738.21	1063.17	1010.84	1037.63	1308.55	-0.584546	0.0742358	-7.87418	3.42985e-15	9.60823e-14	128239	ENSG00000183856	IQGAP3	IQ motif containing GTPase activating protein 3	0.100766	0.527345
4751	254.803	195.932	227.189	129.583	148.977	146.25	183.789	-0.584079	0.136747	-4.27124	1.94389e-05	0.000142099	4751	ENSG00000117650	NEK2	NIMA related kinase 2	0.53119	2.68507e-10
5314	65.0562	47.7685	60.0122	27.4873	26.9958	37.3631	44.1138	-0.583141	0.195869	-2.9772	0.00290898	0.0118744	5314	ENSG00000170927	PKHD1	PKHD1 ciliary IPT domain containing fibrocystin/polyductin	-0.147827	0.726574
23642	1280.52	1167.49	1231.32	851.124	788.877	780.355	1016.62	-0.583014	0.0721998	-8.07501	6.74735e-16	2.03133e-14	23642	ENSG00000255717	SNHG1	small nucleolar RNA host gene 1	0.426698	0.000919181
84144	168.062	148.163	116.809	95.2238	89.986	77.9287	116.029	-0.582462	0.159909	-3.64246	0.000270049	0.00148235	84144	ENSG00000097096	SYDE2	synapse defective Rho GTPase homolog 2	-0.515353	0.0108519
2668	2204.32	2345.51	2347.98	1507.87	1524.76	1538.29	1911.46	-0.582411	0.0572593	-10.1715	2.6586e-24	1.62746e-22	2668	ENSG00000168621	GDNF	glial cell derived neurotrophic factor	0.634013	7.34366e-12
2731	194.084	187.026	181.108	115.839	99.9845	135.575	152.269	-0.582222	0.143406	-4.05995	4.90822e-05	0.000324752	2731	ENSG00000178445	GLDC	glycine decarboxylase	-0.484244	0.16013
55635	440.213	361.097	395.437	249.349	227.965	291.432	327.582	-0.581641	0.115226	-5.04785	4.46812e-07	4.41418e-06	55635	ENSG00000024526	DEPDC1	DEP domain containing 1	-0.237307	0.00398291
55930	858.741	837.163	875.535	611.592	492.923	579.661	709.269	-0.581569	0.0862279	-6.74455	1.53499e-11	2.83785e-10	55930	ENSG00000128833	MYO5C	myosin VC	-0.872046	6.03646e-14
1491	300.343	251.796	277.556	184.558	170.973	172.938	226.361	-0.581152	0.123555	-4.7036	2.55617e-06	2.21428e-05	1491	ENSG00000116761	CTH	cystathionine gamma-lyase	-0.123149	0.528278
2637	599.601	531.121	529.393	375.005	379.941	325.593	456.776	-0.579095	0.0982644	-5.89323	3.78725e-09	5.22502e-08	2637	ENSG00000168505	GBX2	gastrulation brain homeobox 2	-0.821859	0.000106303
134265	884.764	883.312	950.55	581.16	611.905	597.809	751.583	-0.579006	0.0776761	-7.45411	9.04751e-14	2.19585e-12	134265	ENSG00000157510	AFAP1L1	actin filament associated protein 1 like 1	-0.0160088	0.941198
64859	4010.71	3942.92	3902.93	2717.32	2509.61	2663.45	3291.16	-0.578198	0.0510696	-11.3218	1.02393e-29	8.95422e-28	64859	ENSG00000173559	NABP1	nucleic acid binding protein 1	-0.519641	3.73674e-08	YES
26253	2252.03	2417.57	2086.49	1596.23	1441.78	1440.08	1872.36	-0.577656	0.0674036	-8.57011	1.03389e-17	3.67488e-16	26253	ENSG00000166523	CLEC4E	C-type lectin domain family 4 member E	-2.79359	3.02922e-30
54753	297.09	281.753	255.052	169.832	187.971	177.208	228.151	-0.576981	0.122488	-4.71052	2.47086e-06	2.14487e-05	54753	ENSG00000236609	ZNF853	zinc finger protein 853	-0.43833	0.0386641
7348	47.7079	48.5781	66.442	29.4507	26.9958	29.8905	41.5108	-0.576589	0.19693	-2.92788	0.00341281	0.0136413	7348	ENSG00000114638	UPK1B	uroplakin 1B	-0.93204	0.00354211
90649	153.966	151.402	156.46	81.4802	93.9854	111.022	124.719	-0.576009	0.15219	-3.7848	0.000153831	0.000898367	90649	ENSG00000256229	ZNF486	zinc finger protein 486	0.584553	0.00788642
9787	460.815	409.675	449.02	280.763	261.959	314.917	362.858	-0.575571	0.10587	-5.4366	5.43065e-08	6.27238e-07	9787	ENSG00000126787	DLGAP5	DLG associated protein 5	0.0255038	0.814701
4060	4841.26	4749.32	4650.94	3438.86	2969.54	3072.31	3953.71	-0.575247	0.0569122	-10.1076	5.11122e-24	3.05136e-22	4060	ENSG00000139329	LUM	lumican	0.822777	1.88485e-26
28966	635.382	659.043	634.414	428.016	416.935	425.939	533.288	-0.574614	0.0864829	-6.64425	3.04771e-11	5.41058e-10	28966	ENSG00000064652	SNX24	sorting nexin 24	-0.0269373	0.896117
928	2248.77	1983.61	2106.86	1437.19	1392.78	1381.37	1758.43	-0.574249	0.0629211	-9.1265	7.07523e-20	2.968e-18	928	ENSG00000010278	CD9	CD9 molecule	0.394379	0.0182696
6347	3329.79	3559.16	3348.89	2418.88	2300.64	2097.67	2842.51	-0.57407	0.0596545	-9.62325	6.37834e-22	3.23378e-20	6347	ENSG00000108691	CCL2	C-C motif chemokine ligand 2	-1.45345	2.73338e-38
114548	155.051	158.688	158.604	96.2055	97.9848	101.414	127.991	-0.57371	0.14703	-3.902	9.54007e-05	0.000590113	114548	ENSG00000162711	NLRP3	NLR family pyrin domain containing 3	-0.642214	0.00676271
3756	718.871	681.713	767.298	439.797	484.925	501.733	599.056	-0.573553	0.0880333	-6.51519	7.26e-11	1.2396e-09	3756	ENSG00000143473	KCNH1	potassium voltage-gated channel subfamily H member 1	0.0937413	0.611375
26018	994.275	1092.2	1024.49	699.944	700.891	662.928	862.455	-0.572686	0.0750326	-7.63249	2.30259e-14	5.97444e-13	26018	ENSG00000144749	LRIG1	leucine rich repeats and immunoglobulin like domains 1	-0.820643	0.00966355	YES
157313	554.062	479.304	470.452	352.426	323.95	305.31	414.251	-0.571757	0.102299	-5.5891	2.28253e-08	2.81956e-07	157313	ENSG00000184661	CDCA2	cell division cycle associated 2	0.0255174	0.860464
597	277.573	237.223	281.843	167.869	189.97	150.52	217.5	-0.571032	0.128969	-4.42768	9.52532e-06	7.39477e-05	597	ENSG00000140379	BCL2A1	BCL2 related protein A1	-1.54632	1.49131e-07
3880	27449.4	26028.1	26391.4	17131.5	18764.1	17605.5	22228.3	-0.570885	0.0451051	-12.6568	1.02652e-36	1.31522e-34	3880	ENSG00000171345	KRT19	keratin 19	-0.534971	4.78378e-07
5570	116.017	89.0599	98.5914	63.8098	53.9916	62.9835	80.7422	-0.5708	0.172591	-3.30723	0.000942231	0.00444949	5570	ENSG00000135549	PKIB	cAMP-dependent protein kinase inhibitor beta	-0.27623	0.335652
57801	1833.5	1865.4	1861.45	1193.73	1418.78	1072.85	1540.95	-0.569898	0.0789566	-7.21786	5.28102e-13	1.16071e-11	57801	ENSG00000188290	HES4	hes family bHLH transcription factor 4	0.0580997	0.811563
152816	1809.65	1860.54	1842.16	1263.43	1196.81	1222.31	1532.48	-0.569376	0.0600943	-9.47471	2.67514e-21	1.27752e-19	152816	ENSG00000174792	ODAPH	odontogenesis associated phosphoprotein	-0.610783	0.000535548
6509	3997.7	4036.84	4108.69	2634.85	2675.58	2825.72	3379.9	-0.569179	0.0501828	-11.3421	8.11571e-30	7.21163e-28	6509	ENSG00000115902	SLC1A4	solute carrier family 1 member 4	-0.141107	0.327497
80763	70.4775	59.913	69.657	36.3225	34.9946	41.6331	52.1663	-0.568463	0.188674	-3.01294	0.00258731	0.0107256	80763	ENSG00000134548	SPX	spexin hormone	-0.0391863	0.933884
51203	2061.2	1892.12	1927.89	1322.34	1302.8	1303.44	1634.96	-0.567988	0.0608444	-9.33509	1.00902e-20	4.55659e-19	51203	ENSG00000137804	NUSAP1	nucleolar and spindle associated protein 1	0.516388	2.12871e-05
114569	1072.34	965.895	948.406	638.098	661.897	684.278	828.486	-0.567089	0.0780628	-7.26453	3.74342e-13	8.36097e-12	114569	ENSG00000147676	MAL2	mal, T cell differentiation protein 2	-0.902119	7.15765e-11
55005	2014.57	2039.47	2119.72	1445.05	1345.79	1338.67	1717.21	-0.566813	0.0602422	-9.40891	5.01332e-21	2.33409e-19	55005	ENSG00000155906	RMND1	required for meiotic nuclear division 1 homolog	0.143343	0.251139	YES
727677	59.6348	37.2432	55.7256	19.6338	38.9939	16.0127	37.874	-0.566602	0.20319	-2.78853	0.00529477	0.019989	727677	ENSG00000246228	CASC8	cancer susceptibility 8	-0.281847	0.301966
387882	13660.7	12530.7	12845.8	8389.51	8823.63	9000.23	10875.1	-0.566593	0.0474113	-11.9506	6.44663e-33	6.83012e-31	387882	ENSG00000235162	C12orf75	chromosome 12 open reading frame 75	-0.284238	0.00261895
4147	1327.15	1291.37	1353.49	914.934	867.865	867.891	1103.78	-0.566271	0.0673249	-8.41101	4.06489e-17	1.35453e-15	4147	ENSG00000132561	MATN2	matrilin 2	-0.138834	0.297708
1212	4249.25	4207.67	4257.65	2681.97	3150.51	2675.2	3537.04	-0.566193	0.061091	-9.26802	1.89631e-20	8.40273e-19	1212	ENSG00000175416	CLTB	clathrin light chain B	0.0652534	0.719153	YES	YES
83903	425.034	395.912	427.587	243.459	285.956	288.229	344.363	-0.565186	0.106672	-5.29838	1.16834e-07	1.27293e-06	83903	ENSG00000177602	HASPIN	histone H3 associated protein kinase	-0.150421	0.365801
28984	101.921	97.9658	112.523	70.6816	64.9899	52.3083	83.3983	-0.56414	0.170687	-3.30511	0.00094938	0.00448068	28984	ENSG00000102760	RGCC	regulator of cell cycle	0.136255	0.748957
24147	2006.98	2196.54	2139	1352.77	1566.76	1320.52	1763.76	-0.564102	0.0694665	-8.12049	4.64314e-16	1.41069e-14	24147	ENSG00000179431	FJX1	four-jointed box kinase 1	-0.196884	0.0897088
91624	3204.02	2709.04	2761.63	1973.19	1791.72	2031.48	2411.85	-0.563963	0.069077	-8.16426	3.23414e-16	9.88057e-15	91624	ENSG00000162614	NEXN	nexilin F-actin binding protein	-0.214092	0.0730386
84962	6435.14	6496.51	6813.52	4330.23	4619.28	4331.98	5504.44	-0.56386	0.0481364	-11.7138	1.0831e-31	1.08494e-29	84962	ENSG00000129474	AJUBA	ajuba LIM protein	-0.128164	0.203484	YES	YES
25788	687.427	662.281	638.701	435.87	436.932	447.289	551.417	-0.563736	0.0860012	-6.55497	5.56514e-11	9.58132e-10	25788	ENSG00000197275	RAD54B	RAD54 homolog B	0.240469	0.0180469
8549	39.0337	42.9107	37.5076	17.6704	22.9964	19.2153	29.889	-0.563574	0.202741	-2.77977	0.00543967	0.0204334	8549	ENSG00000139292	LGR5	leucine rich repeat containing G protein-coupled receptor 5	0.00399409	0.991679
494143	199.506	175.691	222.902	138.418	120.981	119.562	162.843	-0.562868	0.141035	-3.99097	6.58027e-05	0.0004222	494143	ENSG00000143942	CHAC2	ChaC glutathione specific gamma-glutamylcyclotransferase 2	0.361134	0.0399851
80310	100.837	106.872	112.523	85.4069	39.9938	62.9835	84.7693	-0.561689	0.18049	-3.11202	0.00185812	0.00804372	80310	ENSG00000170962	PDGFD	platelet derived growth factor D	-2.77086	1.99616e-23
596	114.933	129.542	122.168	74.6084	77.9879	74.7262	98.994	-0.561158	0.160146	-3.50404	0.000458257	0.00236173	596	ENSG00000171791	BCL2	BCL2 apoptosis regulator	-1.05	3.7215e-05	YES
5332	4013.97	3781.81	3671.46	2742.84	2246.65	2699.75	3192.74	-0.560383	0.0676719	-8.28088	1.22264e-16	3.88611e-15	5332	ENSG00000101333	PLCB4	phospholipase C beta 4	-0.173914	0.092097
7516	418.528	392.673	402.939	244.441	281.956	272.217	335.459	-0.560264	0.105768	-5.29711	1.17653e-07	1.27932e-06	7516	ENSG00000196584	XRCC2	X-ray repair cross complementing 2	0.0790122	0.69944	YES
55349	422.865	441.251	424.372	283.708	286.955	280.757	356.651	-0.559779	0.100881	-5.54891	2.87449e-08	3.47508e-07	55349	ENSG00000016391	CHDH	choline dehydrogenase	-0.264708	0.0807032
115572	217.938	208.886	227.189	133.51	134.979	152.655	179.193	-0.559016	0.132485	-4.21946	2.44887e-05	0.000174311	115572	ENSG00000158246	TENT5B	terminal nucleotidyltransferase 5B	0.050414	0.751657
102659353	518.281	521.405	507.96	360.28	328.949	337.335	429.035	-0.558624	0.0947592	-5.89519	3.74247e-09	5.1762e-08	102659353	ENSG00000280634	THRIL	TNF and HNRNPL related immunoregulatory long non-coding RNA	-0.0113481	NA
1062	605.022	542.455	530.465	347.518	364.943	400.319	465.12	-0.557311	0.0966536	-5.76607	8.11424e-09	1.07548e-07	1062	ENSG00000138778	CENPE	centromere protein E	-0.0280912	0.880535
5817	11842.4	11469.3	11827.8	7574.71	8115.74	8083.24	9818.85	-0.556996	0.0442167	-12.597	2.19418e-36	2.68633e-34	5817	ENSG00000073008	PVR	PVR cell adhesion molecule	-0.61513	6.57415e-09
256691	2344.19	1922.07	2119.72	1363.57	1343.79	1570.32	1777.28	-0.556439	0.0762784	-7.29484	2.99004e-13	6.77907e-12	256691	ENSG00000165072	MAMDC2	MAM domain containing 2	-1.7285	5.20916e-16
8438	526.955	464.73	562.614	370.097	334.948	320.255	429.933	-0.556221	0.102278	-5.43831	5.37876e-08	6.21826e-07	8438	ENSG00000085999	RAD54L	RAD54 like	-0.41839	0.000352818
3485	210.348	219.411	222.902	121.729	157.975	140.912	178.88	-0.555722	0.135018	-4.11591	3.85655e-05	0.00026177	3485	ENSG00000115457	IGFBP2	insulin like growth factor binding protein 2	-0.529413	0.108702
135295	45.5393	62.3419	61.0838	27.4873	34.9946	30.958	43.7341	-0.554863	0.1955	-2.83817	0.00453731	0.0174727	135295	ENSG00000154548	SRSF12	serine and arginine rich splicing factor 12	-0.53916	0.029419
165679	10.8427	17.812	24.6479	1.96338	0.999845	8.54013	10.801	-0.554773	0.182916	-3.03294	0.0024218	0.0101361	165679	ENSG00000196542	SPTSSB	serine palmitoyltransferase small subunit B	NA	NA
4603	3608.45	3410.18	3388.54	2374.71	2292.64	2377.36	2908.65	-0.5534	0.0521078	-10.6203	2.39802e-26	1.69378e-24	4603	ENSG00000185697	MYBL1	MYB proto-oncogene like 1	0.467329	1.22728e-08
683	660.32	720.575	656.919	453.54	473.926	436.614	566.982	-0.55306	0.0872207	-6.34092	2.28394e-10	3.69726e-09	683	ENSG00000109743	BST1	bone marrow stromal cell antigen 1	-0.247203	0.0656672
133522	177.82	198.361	191.825	137.436	95.9851	129.17	155.099	-0.552968	0.145595	-3.79798	0.000145882	0.000857447	133522	ENSG00000155846	PPARGC1B	PPARG coactivator 1 beta	-0.352653	0.228089
1839	4005.29	3949.4	3992.95	2745.78	2650.59	2702.95	3341.16	-0.55282	0.0480715	-11.4999	1.31998e-30	1.22565e-28	1839	ENSG00000113070	HBEGF	heparin binding EGF like growth factor	-1.16073	1.20395e-27
574036	216.854	199.17	218.616	123.693	167.974	113.157	173.244	-0.552784	0.143268	-3.85839	0.000114135	0.000694326	574036	NA	SERTAD4-AS1	SERTAD4 antisense RNA 1	0.823917	8.69663e-08
5888	732.966	755.389	805.878	508.515	548.915	477.18	638.14	-0.552737	0.0853786	-6.47395	9.54757e-11	1.61352e-09	5888	ENSG00000051180	RAD51	RAD51 recombinase	0.185041	0.115393
51465	4225.4	3656.31	3884.72	2735.97	2573.6	2641.04	3286.17	-0.552695	0.0587228	-9.41192	4.87149e-21	2.27446e-19	51465	ENSG00000198833	UBE2J1	ubiquitin conjugating enzyme E2 J1	-0.0322307	0.796916	YES
100616345	28.191	39.6721	40.7225	20.6155	14.9977	17.0803	26.8798	-0.552343	0.204221	-2.70463	0.00683795	0.0246226	100616345	ENSG00000283795	MIR4426	microRNA 4426	0.0772398	0.852834
440829	23.8539	17.0023	27.8628	6.87182	9.99845	8.54013	15.6882	-0.551889	0.200529	-2.75217	0.00592021	0.0219119	440829	ENSG00000234965	SHISA8	shisa family member 8	0.095426	NA
666	2884.16	2857.2	2900.94	1845.58	2097.67	1904.45	2415	-0.551658	0.0583434	-9.45537	3.21872e-21	1.51997e-19	666	ENSG00000176720	BOK	BCL2 family apoptosis regulator BOK	0.109746	0.277243	YES
25802	187.579	163.546	159.675	105.041	106.983	114.224	139.508	-0.550649	0.144928	-3.79947	0.000145007	0.000852912	25802	ENSG00000163431	LMOD1	leiomodin 1	-0.496985	0.124109
91768	1118.97	1184.5	1173.45	763.754	795.876	788.895	970.907	-0.549754	0.0701743	-7.83412	4.72155e-15	1.31377e-13	91768	ENSG00000134508	CABLES1	Cdk5 and Abl enzyme substrate 1	-0.145781	0.190451	YES	YES
645166	93.2472	59.1034	82.5167	28.469	34.9946	66.186	60.7528	-0.549674	0.195955	-2.8051	0.00503015	0.0191445	645166	ENSG00000232527	LSP1P5	LSP1 pseudogene 5	-0.0417077	0.923956
54478	530.208	452.586	505.817	330.829	334.948	323.458	412.974	-0.549316	0.0993487	-5.52918	3.21735e-08	3.84778e-07	54478	ENSG00000129195	PIMREG	PICALM interacting mitotic regulator	0.364592	0.000174402
57082	348.05	386.196	370.789	243.459	240.963	248.731	306.365	-0.549263	0.108094	-5.08136	3.74739e-07	3.77203e-06	57082	ENSG00000137812	KNL1	kinetochore scaffold 1	0.0606182	0.774349
79077	3465.33	3375.37	3539.65	2178.37	2541.6	2313.31	2902.27	-0.549121	0.0595541	-9.22054	2.95596e-20	1.27896e-18	79077	ENSG00000179958	DCTPP1	dCTP pyrophosphatase 1	0.0367231	0.86072
4495	28.191	25.9083	18.218	7.85351	8.9986	11.7427	16.8187	-0.548282	0.201947	-2.71498	0.00662799	0.0239826	4495	ENSG00000125144	MT1G	metallothionein 1G	-0.0614547	0.860735
618	1154.75	567.554	567.972	403.474	405.937	368.293	577.996	-0.547923	0.202472	-2.70617	0.00680639	0.0245303	618	ENSG00000236824	BCYRN1	brain cytoplasmic RNA 1	0.0497155	0.909879
805	17966.3	16183	17171	12125.8	11031.3	11757.6	14372.5	-0.546965	0.0502566	-10.8834	1.38241e-27	1.05293e-25	805	ENSG00000143933	CALM2	calmodulin 2	0.0411583	0.798232	YES
6790	1293.53	1181.26	1340.63	878.612	868.865	827.325	1065.04	-0.546822	0.0724022	-7.55255	4.26813e-14	1.07536e-12	6790	ENSG00000087586	AURKA	aurora kinase A	0.22139	0.00462435
65062	1935.42	1807.91	1831.44	1287.98	1216.81	1275.68	1559.21	-0.546697	0.061579	-8.87799	6.80806e-19	2.70489e-17	65062	ENSG00000155755	TMEM237	transmembrane protein 237	0.0408645	0.775744	YES
158471	303.595	243.7	283.986	164.924	178.972	198.558	228.956	-0.546695	0.126938	-4.30677	1.65654e-05	0.000122393	158471	ENSG00000106772	PRUNE2	prune homolog 2 with BCH domain	-0.893418	0.00546263
1869	4013.97	4227.91	4058.32	2728.11	2991.53	2642.1	3443.66	-0.546476	0.0557887	-9.79546	1.17762e-22	6.38153e-21	1869	ENSG00000101412	E2F1	E2F transcription factor 1	0.552725	8.8767e-09	YES	YES
55897	93.2472	104.443	115.738	61.8464	61.9904	69.3886	84.4422	-0.546017	0.169081	-3.22932	0.00124085	0.00567954	55897	ENSG00000166823	MESP1	mesoderm posterior bHLH transcription factor 1	0.212534	0.567857
3625	46.6236	45.3396	38.5792	28.469	24.9961	12.8102	32.8029	-0.545819	0.202936	-2.68961	0.00715358	0.0255752	3625	ENSG00000163083	INHBB	inhibin subunit beta B	1.18582	1.01161e-06
4739	1559.18	1441.15	1538.88	989.543	996.845	1087.8	1268.9	-0.545714	0.0678446	-8.0436	8.72384e-16	2.59798e-14	4739	ENSG00000111859	NEDD9	neural precursor cell expressed, developmentally down-regulated 9	-0.912869	2.03139e-18	YES	YES
2125	3672.42	3895.96	3938.3	2390.41	2863.55	2562.04	3220.45	-0.544721	0.0628216	-8.67092	4.28647e-18	1.59206e-16	2125	ENSG00000167880	EVPL	envoplakin	-0.951962	3.58602e-20
162967	137.702	90.6791	94.3048	81.4802	48.9924	61.916	85.8458	-0.544614	0.18014	-3.02327	0.00250055	0.0104261	162967	ENSG00000182986	ZNF320	zinc finger protein 320	0.135548	0.706185
5125	68.309	89.0599	77.1585	47.1211	48.9924	43.7682	62.4015	-0.544461	0.182451	-2.98415	0.00284368	0.0116366	5125	ENSG00000099139	PCSK5	proprotein convertase subtilisin/kexin type 5	-0.202523	0.497846	YES
1163	2283.47	2069.43	2304.04	1449.95	1587.75	1479.58	1862.37	-0.544123	0.0637687	-8.53276	1.42897e-17	5.01444e-16	1163	ENSG00000173207	CKS1B	CDC28 protein kinase regulatory subunit 1B	0.394913	0.00751
26524	4085.53	3924.3	3955.44	2652.52	2793.57	2713.63	3354.16	-0.543755	0.0495851	-10.9661	5.56205e-28	4.3363e-26	26524	ENSG00000150457	LATS2	large tumor suppressor kinase 2	0.0655321	0.635843	YES	YES
51119	3781.93	3402.9	3547.15	2347.22	2443.62	2516.14	3006.49	-0.543437	0.0559701	-9.70942	2.74892e-22	1.44695e-20	51119	ENSG00000126524	SBDS	SBDS ribosome maturation factor	0.269407	0.0121583	YES	YES
55276	2334.43	2113.96	2247.24	1600.15	1409.78	1537.22	1873.8	-0.543064	0.0643747	-8.43598	3.2845e-17	1.11015e-15	55276	ENSG00000169299	PGM2	phosphoglucomutase 2	-0.0981723	0.375605	YES
116984	460.815	382.148	335.425	230.697	249.961	295.702	325.791	-0.54292	0.122226	-4.44192	8.91596e-06	6.97082e-05	116984	ENSG00000047365	ARAP2	ArfGAP with RhoGAP domain, ankyrin repeat and PH domain 2	0.0204454	0.915889	YES
7694	29.2753	49.3877	36.436	19.6338	19.9969	18.1478	28.8129	-0.542758	0.203858	-2.66244	0.00775769	0.0274031	7694	ENSG00000176293	ZNF135	zinc finger protein 135	-0.152175	NA
441459	233.118	255.035	264.696	154.125	139.978	197.491	207.407	-0.542464	0.133944	-4.04994	5.12313e-05	0.000337485	441459	ENSG00000230453	ANKRD18B	ankyrin repeat domain 18B	-0.0978204	0.656801
283417	268.899	259.083	252.908	176.704	138.978	195.356	215.321	-0.542387	0.130592	-4.15329	3.27731e-05	0.000227021	283417	ENSG00000177990	DPY19L2	dpy-19 like 2	-0.229122	0.35812
1719	3212.69	2687.18	3252.44	2236.29	1872.71	2086.99	2558.05	-0.542163	0.0747401	-7.25398	4.04711e-13	9.01492e-12	1719	ENSG00000228716	DHFR	dihydrofolate reductase	0.389467	1.79733e-07
58480	97.5843	119.826	103.95	70.6816	68.9893	59.7809	86.8019	-0.542114	0.168294	-3.22123	0.0012764	0.00582291	58480	ENSG00000116574	RHOU	ras homolog family member U	-0.191249	0.603435
440519	52.0449	43.7203	56.7972	32.3957	23.9963	26.6879	39.2737	-0.542113	0.198039	-2.73741	0.00619258	0.0226993	440519	ENSG00000196081	ZNF724	zinc finger protein 724	-0.263668	0.484504
81931	116.017	85.8213	118.953	60.8647	72.9886	61.916	86.0934	-0.542103	0.172143	-3.14914	0.00163749	0.00723263	81931	ENSG00000184635	ZNF93	zinc finger protein 93	2.83048	3.24249e-35
10293	371.904	327.093	365.431	248.367	232.964	224.178	294.99	-0.541834	0.11164	-4.85339	1.21366e-06	1.1052e-05	10293	ENSG00000183763	TRAIP	TRAF interacting protein	0.310693	0.00636108
83461	378.41	330.331	379.363	235.605	239.963	246.596	301.711	-0.541592	0.110683	-4.8932	9.92113e-07	9.21734e-06	83461	ENSG00000111665	CDCA3	cell division cycle associated 3	0.330491	0.000131932
5865	15225.3	14302.2	15316	10533.5	9520.52	10587.6	12580.9	-0.540832	0.0502864	-10.755	5.61209e-27	4.10427e-25	5865	ENSG00000169213	RAB3B	RAB3B, member RAS oncogene family	-0.925205	7.39514e-10	YES	YES
23471	20397.3	19252.3	19538.2	14081.3	12675	13718.7	16610.5	-0.540665	0.0475865	-11.3617	6.48351e-30	5.85571e-28	23471	ENSG00000067167	TRAM1	translocation associated membrane protein 1	-0.00918454	0.929644	YES
144406	246.129	217.792	228.261	143.327	142.978	166.533	190.836	-0.540534	0.130863	-4.13053	3.61922e-05	0.000247388	144406	ENSG00000158023	CFAP251	cilia and flagella associated protein 251	0.406047	0.0372639
10849	598.517	534.359	528.321	361.262	375.942	378.968	462.895	-0.540364	0.094339	-5.72789	1.01688e-08	1.32651e-07	10849	ENSG00000117877	POLR1G	RNA polymerase I subunit G	-0.412188	0.00039295	YES
340578	313.354	336.808	347.213	207.136	232.964	223.111	276.764	-0.540231	0.11332	-4.76731	1.86706e-06	1.65641e-05	340578	ENSG00000198354	DCAF12L2	DDB1 and CUL4 associated factor 12 like 2	-3.96871	4.7228e-54
100506895	61.8034	59.1034	55.7256	40.2492	27.9956	32.0255	46.1504	-0.540112	0.193287	-2.79435	0.00520048	0.019687	100506895	ENSG00000231638	LUARIS	lncRNA upregulator of antiviral response interferon signaling	0.504416	0.136677
729582	98.6685	90.6791	85.7317	58.9013	52.9918	56.5784	73.9251	-0.538857	0.173933	-3.09808	0.00194781	0.00838369	729582	NA	DIRC3	disrupted in renal carcinoma 3	-1.54444	7.73262e-08
109	1197.03	1214.45	1228.11	774.553	854.867	847.608	1019.44	-0.538661	0.07044	-7.64709	2.05578e-14	5.35929e-13	109	ENSG00000138031	ADCY3	adenylate cyclase 3	-0.625637	4.61804e-07
8821	524.786	489.02	491.885	330.829	316.951	364.023	419.582	-0.538646	0.097729	-5.51162	3.55538e-08	4.23672e-07	8821	ENSG00000109452	INPP4B	inositol polyphosphate-4-phosphatase type II B	-0.686475	2.58587e-06
201255	2142.52	2454	2208.66	1479.41	1713.73	1436.88	1905.87	-0.538576	0.0723445	-7.4446	9.72392e-14	2.3394e-12	201255	ENSG00000169683	LRRC45	leucine rich repeat containing 45	-0.0505617	0.698752	YES
2621	11247.1	11341.4	11469.8	7668.95	8324.71	7321.03	9562.17	-0.53847	0.0496767	-10.8395	2.23712e-27	1.68069e-25	2621	ENSG00000183087	GAS6	growth arrest specific 6	-0.262899	0.0014299	YES
3488	90775	95847.8	95363.6	64984.9	65013.9	63570.6	79259.3	-0.537901	0.0386885	-13.9034	6.04019e-44	1.07346e-41	3488	ENSG00000115461	IGFBP5	insulin like growth factor binding protein 5	-1.98222	2.05437e-72	YES
23590	284.079	220.221	301.132	190.448	149.977	183.613	221.578	-0.537812	0.135418	-3.9715	7.14212e-05	0.000454544	23590	ENSG00000148459	PDSS1	decaprenyl diphosphate synthase subunit 1	0.681358	1.81204e-06
595135	272.152	269.608	280.771	188.484	183.971	171.87	227.81	-0.537433	0.120193	-4.47142	7.77012e-06	6.1506e-05	595135	ENSG00000277778	PGM5P2	phosphoglucomutase 5 pseudogene 2	-0.714522	0.0105547
221150	629.961	625.848	657.99	441.76	422.934	429.142	534.606	-0.537412	0.0866972	-6.19872	5.6923e-10	8.65523e-09	221150	ENSG00000165480	SKA3	spindle and kinetochore associated complex subunit 3	0.402001	0.00125048
29078	402.264	358.668	423.3	231.679	275.957	280.757	328.771	-0.537249	0.112022	-4.79592	1.61933e-06	1.45142e-05	29078	ENSG00000123545	NDUFAF4	NADH:ubiquinone oxidoreductase complex assembly factor 4	0.194158	0.243763	YES
2820	1845.43	1712.38	1748.93	1185.88	1177.82	1258.6	1488.17	-0.537054	0.063082	-8.5136	1.68619e-17	5.8549e-16	2820	ENSG00000115159	GPD2	glycerol-3-phosphate dehydrogenase 2	-0.422665	0.000195567	YES
10606	7608.32	6886.76	7339.7	5039.01	4952.23	4974.63	6133.44	-0.53663	0.0484233	-11.0821	1.53279e-28	1.2358e-26	10606	ENSG00000128050	PAICS	phosphoribosylaminoimidazole carboxylase and phosphoribosylaminoimidazolesuccinocarboxamide synthase	0.0827476	0.3328	YES
9413	276.489	208.076	231.475	152.162	143.978	170.803	197.164	-0.536516	0.135365	-3.96349	7.3862e-05	0.000467736	9413	ENSG00000135063	FAM189A2	family with sequence similarity 189 member A2	-1.2984	2.86478e-05
56704	189.747	201.599	208.971	135.473	127.98	129.17	165.49	-0.536263	0.135153	-3.96783	7.25309e-05	0.000460719	56704	ENSG00000104369	JPH1	junctophilin 1	-0.942409	5.15371e-06
22875	1254.5	1242.79	1127.37	875.667	722.888	863.621	1014.47	-0.536127	0.0806701	-6.64592	3.01326e-11	5.36093e-10	22875	ENSG00000001561	ENPP4	ectonucleotide pyrophosphatase/phosphodiesterase 4	-0.367692	0.000133127	YES
83851	41.2022	42.9107	35.3643	18.6521	27.9956	13.8777	30.0004	-0.535252	0.20363	-2.62855	0.00857495	0.0298498	83851	ENSG00000139973	SYT16	synaptotagmin 16	-0.284148	NA
139170	1186.19	1145.63	1197.03	792.223	797.876	817.718	989.445	-0.53467	0.0691261	-7.73471	1.0364e-14	2.80813e-13	139170	ENSG00000198889	DCAF12L1	DDB1 and CUL4 associated factor 12 like 1	0.0392645	0.790863
3795	171.315	145.734	125.383	89.3337	96.9849	96.0765	120.804	-0.534655	0.155096	-3.44724	0.000566338	0.00285032	3795	ENSG00000138030	KHK	ketohexokinase	0.364747	0.269846
285016	19.5169	23.4794	19.2896	8.8352	6.99891	7.47262	14.2654	-0.534017	0.199475	-2.67712	0.00742581	0.0263944	285016	ENSG00000189292	ALKAL2	ALK and LTK ligand 2	-0.0309698	NA
7004	649.477	722.194	752.295	470.229	525.918	440.884	593.5	-0.533775	0.0916921	-5.82139	5.83618e-09	7.84869e-08	7004	ENSG00000197905	TEAD4	TEA domain transcription factor 4	-0.066436	0.668312	YES
55215	2559.96	2386.8	2413.35	1768.02	1561.76	1708.03	2066.32	-0.533755	0.0615383	-8.67353	4.18923e-18	1.55945e-16	55215	ENSG00000140525	FANCI	FA complementation group I	0.352604	0.00015553	YES
8707	10.8427	15.3831	9.64481	2.94507	0.999845	0	6.63591	-0.533391	0.167262	-3.18895	0.00142789	0.00643405	8707	ENSG00000162630	B3GALT2	beta-1,3-galactosyltransferase 2	0.452883	0.193216	YES	YES
56992	279.742	289.04	275.413	191.429	184.971	185.748	234.39	-0.533328	0.11842	-4.50368	6.67865e-06	5.36891e-05	56992	ENSG00000163808	KIF15	kinesin family member 15	0.331136	0.00681242
29127	1532.07	1402.29	1529.24	960.092	958.851	1126.23	1251.46	-0.532417	0.0744961	-7.14691	8.87536e-13	1.90016e-11	29127	ENSG00000161800	RACGAP1	Rac GTPase activating protein 1	0.334007	0.000318756
9353	214.685	197.551	226.117	133.51	132.979	152.655	176.25	-0.530937	0.134308	-3.95312	7.71372e-05	0.000485944	9353	ENSG00000145147	SLIT2	slit guidance ligand 2	-1.40535	3.95942e-14
51659	1181.85	1035.52	1129.51	711.725	826.871	740.857	937.724	-0.530604	0.0793988	-6.68277	2.34464e-11	4.22137e-10	51659	ENSG00000131153	GINS2	GINS complex subunit 2	0.163262	0.267829
51196	467.32	401.579	465.094	323.957	270.958	299.972	371.48	-0.530425	0.106823	-4.96546	6.85394e-07	6.56706e-06	51196	ENSG00000138193	PLCE1	phospholipase C epsilon 1	0.590762	0.000142782	YES	YES
102724927	13.0112	12.1445	15.003	3.92676	1.99969	2.13503	8.03671	-0.529689	0.17926	-2.95486	0.00312812	0.0126533	102724927	ENSG00000262185	LINC02861	long intergenic non-protein coding RNA 2861	-0.153343	0.709312
221687	478.163	365.955	406.154	280.763	263.959	291.432	347.738	-0.529427	0.112419	-4.70942	2.48419e-06	2.15532e-05	221687	ENSG00000180537	RNF182	ring finger protein 182	-0.564613	0.000448273
100506844	50.9607	71.2479	60.0122	28.469	29.9953	45.9032	47.7647	-0.529329	0.195065	-2.71361	0.00665543	0.0240702	100506844	ENSG00000257698	GIHCG	GIHCG inhibitor of miR-200b/200a/429 expression	0.384239	0.167857
5905	8295.75	8289.04	8673.9	5556.36	6124.05	5732.56	7111.94	-0.52885	0.0484825	-10.9081	1.05479e-27	8.14651e-26	5905	ENSG00000100401	RANGAP1	Ran GTPase activating protein 1	0.0520907	0.595558	YES
11250	56.382	86.6309	69.657	37.3042	43.9932	44.8357	56.4672	-0.528391	0.188755	-2.79935	0.00512059	0.0194329	11250	ENSG00000135973	GPR45	G protein-coupled receptor 45	-0.606585	0.0450958
10418	61.8034	50.1974	63.2271	37.3042	32.9949	29.8905	45.9029	-0.528201	0.193407	-2.73103	0.00631368	0.0230613	10418	ENSG00000262655	SPON1	spondin 1	NA	NA	YES	YES
57574	2612.01	2454	2717.69	1754.28	1799.72	1800.9	2189.77	-0.527634	0.0577377	-9.13847	6.33449e-20	2.67083e-18	57574	ENSG00000144583	MARCHF4	membrane associated ring-CH-type finger 4	-1.71271	3.40982e-22
3015	13504.6	12704	13453.4	8889.19	9785.48	8682.11	11169.8	-0.527141	0.0509865	-10.3388	4.70262e-25	3.09661e-23	3015	ENSG00000164032	H2AZ1	H2A.Z variant histone 1	-0.0612364	0.858408
55839	1759.77	1519.68	1582.82	1078.88	1117.83	1140.11	1366.51	-0.525915	0.0692886	-7.5902	3.19412e-14	8.18488e-13	55839	ENSG00000166451	CENPN	centromere protein N	0.460782	1.1362e-06
55166	725.376	576.46	606.551	422.126	415.935	454.762	533.535	-0.525647	0.0977143	-5.37943	7.47237e-08	8.40159e-07	55166	ENSG00000031691	CENPQ	centromere protein Q	0.357873	2.62696e-05	YES
55650	1729.41	1763.39	1722.13	1183.92	1172.82	1238.32	1468.33	-0.525215	0.0608797	-8.62709	6.2931e-18	2.28097e-16	55650	ENSG00000060642	PIGV	phosphatidylinositol glycan anchor biosynthesis class V	-0.336778	0.0159845	YES
22871	163.725	143.305	169.32	106.022	95.9851	106.752	130.852	-0.525042	0.148275	-3.541	0.000398613	0.00208358	22871	ENSG00000169760	NLGN1	neuroligin 1	-1.72775	9.50386e-16
2352	196.253	212.124	207.899	124.675	142.978	139.845	170.629	-0.524997	0.134509	-3.90305	9.49881e-05	0.000588001	2352	ENSG00000110203	FOLR3	folate receptor gamma	0.0852061	0.838788
5787	2609.84	2553.59	2624.46	1795.51	1685.74	1891.64	2193.46	-0.524608	0.0579802	-9.04806	1.45537e-19	6.01359e-18	5787	ENSG00000127329	PTPRB	protein tyrosine phosphatase receptor type B	-1.30748	3.23281e-18	YES
195828	1315.22	1237.93	1234.54	897.264	835.87	870.026	1065.14	-0.524455	0.0691722	-7.58188	3.40577e-14	8.64679e-13	195828	ENSG00000165244	ZNF367	zinc finger protein 367	0.0548013	0.652602	YES	YES
114880	376.242	310.9	381.506	220.88	243.962	250.866	297.393	-0.524171	0.115899	-4.52265	6.10699e-06	4.9649e-05	114880	ENSG00000079156	OSBPL6	oxysterol binding protein like 6	0.0028284	0.991075
113612	1948.43	1889.69	1881.81	1341.97	1220.81	1380.3	1610.5	-0.523597	0.063373	-8.26215	1.43066e-16	4.51259e-15	113612	ENSG00000155016	CYP2U1	cytochrome P450 family 2 subfamily U member 1	-0.227533	0.0856973
5563	627.792	563.506	650.489	442.742	361.944	445.154	515.271	-0.523041	0.0985442	-5.30768	1.11026e-07	1.21365e-06	5563	ENSG00000162409	PRKAA2	protein kinase AMP-activated catalytic subunit alpha 2	-2.29904	6.2599e-21	YES
22974	3907.71	3575.35	4063.68	2670.19	2626.59	2677.33	3253.48	-0.52289	0.0560436	-9.33004	1.05826e-20	4.76593e-19	22974	ENSG00000088325	TPX2	TPX2 microtubule nucleation factor	0.106777	0.219209
105376779	121.438	129.542	171.463	86.3886	88.9862	95.009	115.471	-0.522165	0.159244	-3.27903	0.00104163	0.00487155	105376779	NA	NA	NA	0.0650814	NA
6470	1880.12	1953.65	1947.18	1286.01	1375.79	1333.33	1629.35	-0.521894	0.0598238	-8.72384	2.6892e-18	1.01943e-16	6470	ENSG00000176974	SHMT1	serine hydroxymethyltransferase 1	0.182214	0.0852
554236	280.826	289.849	257.195	198.301	153.976	200.693	230.14	-0.52168	0.126853	-4.11249	3.9142e-05	0.000265357	554236	NA	DPY19L2P1	DPY19L2 pseudogene 1	0.124173	0.558175
653145	83.4887	89.0599	80.3734	49.0845	56.9911	50.1733	68.1951	-0.521503	0.177434	-2.93914	0.00329124	0.0132226	653145	ENSG00000265190	ANXA8	annexin A8	-0.115528	0.766567
60312	6224.79	6040.69	6197.33	4171.2	4303.33	4333.05	5211.73	-0.521072	0.0447635	-11.6406	2.56341e-31	2.46325e-29	60312	ENSG00000196526	AFAP1	actin filament associated protein 1	-0.749511	2.73197e-07	YES
90417	519.365	510.07	513.318	346.536	362.944	342.673	432.484	-0.521002	0.0936677	-5.56224	2.66335e-08	3.24391e-07	90417	ENSG00000128944	KNSTRN	kinetochore localized astrin (SPAG5) binding protein	0.309879	0.00745288
9928	389.253	370.813	394.366	268.983	243.962	269.014	322.732	-0.520101	0.106234	-4.89578	9.79145e-07	9.10197e-06	9928	ENSG00000118193	KIF14	kinesin family member 14	#N/A	#N/A
10528	9402.78	9242.79	9473.35	6259.25	6802.94	6457.41	7939.75	-0.519966	0.0453156	-11.4743	1.77531e-30	1.63924e-28	10528	ENSG00000101361	NOP56	NOP56 ribonucleoprotein	-0.118534	0.332427	YES
93081	816.455	737.577	785.516	536.984	509.921	557.244	657.283	-0.519692	0.0829698	-6.26363	3.76126e-10	5.88694e-09	93081	ENSG00000151287	TEX30	testis expressed 30	0.353281	0.0165508
199953	2316	2520.39	2414.42	1578.56	1791.72	1646.11	2044.53	-0.519652	0.062401	-8.32762	8.24854e-17	2.64722e-15	199953	ENSG00000188807	TMEM201	transmembrane protein 201	-0.494622	0.000101262	YES
100302650	46.6236	42.9107	35.3643	26.5056	14.9977	24.5529	31.8258	-0.5192	0.202786	-2.56033	0.0104573	0.0350903	100302650	NA	BABAM2-AS1	BABAM2 antisense RNA 1	0.409732	0.259124
121268	137.702	134.399	135.027	87.3703	87.9863	88.6039	111.848	-0.519062	0.153348	-3.38486	0.000712137	0.00349057	121268	ENSG00000167550	RHEBL1	RHEB like 1	-0.209287	0.467831
1466	1493.04	1297.84	1427.43	977.762	981.847	946.887	1187.47	-0.518722	0.070649	-7.34225	2.10031e-13	4.88241e-12	1466	ENSG00000175183	CSRP2	cysteine and glycine rich protein 2	0.051988	0.786155	YES	YES
29028	4432.49	4163.95	4159.06	2964.7	2809.56	3077.65	3601.24	-0.517922	0.0530826	-9.75691	1.72324e-22	9.24733e-21	29028	ENSG00000156802	ATAD2	ATPase family AAA domain containing 2	0.384357	0.000341849
39	2226.01	2015.99	2195.8	1496.09	1407.78	1550.03	1815.28	-0.517549	0.0631766	-8.1921	2.56706e-16	7.91574e-15	39	ENSG00000120437	ACAT2	acetyl-CoA acetyltransferase 2	0.17952	0.14045	YES
92558	765.494	795.062	718.003	533.057	525.918	509.205	641.123	-0.517229	0.0826813	-6.2557	3.95741e-10	6.15896e-09	92558	ENSG00000135127	BICDL1	BICD family like cargo adaptor 1	-0.112131	0.569705
50855	246.129	234.794	242.192	157.07	161.975	165.465	201.271	-0.516466	0.125353	-4.12008	3.78738e-05	0.000257613	50855	ENSG00000102981	PARD6A	par-6 family cell polarity regulator alpha	0.127431	0.694417
301	7027.15	5941.91	6508.1	4640.44	4279.33	4584.98	5496.99	-0.516325	0.0593948	-8.69311	3.52653e-18	1.32771e-16	301	ENSG00000135046	ANXA1	annexin A1	0.574699	1.36686e-09	YES	YES
160335	331.786	376.48	350.428	237.569	230.964	250.866	296.349	-0.516161	0.110598	-4.66702	3.05601e-06	2.61032e-05	160335	ENSG00000179104	TMTC2	transmembrane O-mannosyltransferase targeting cadherins 2	-1.33802	3.89306e-09
374987	195.169	184.597	219.687	120.748	156.976	116.359	165.589	-0.515909	0.142875	-3.61093	0.000305107	0.00164797	374987	ENSG00000235927	NEXN-AS1	NEXN antisense RNA 1	-0.643642	0.00685847
26033	287.331	284.992	318.279	211.063	171.973	215.638	248.213	-0.515905	0.121989	-4.22912	2.34609e-05	0.000168008	26033	ENSG00000107518	ATRNL1	attractin like 1	0.728821	2.54995e-08	YES
3925	8089.73	7206.56	7721.21	5299.16	5288.18	5420.85	6504.28	-0.515462	0.0500442	-10.3001	7.03633e-25	4.56065e-23	3925	ENSG00000117632	STMN1	stathmin 1	0.149999	0.201147	YES
57554	58.5506	60.7226	63.2271	43.1943	29.9953	34.1605	48.3084	-0.514059	0.191799	-2.68019	0.00735801	0.0261872	57554	ENSG00000033122	LRRC7	leucine rich repeat containing 7	0.364977	0.240649
3897	15288.2	16561.1	15782.1	10890.9	11567.2	10749.9	13473.2	-0.513743	0.0465561	-11.0349	2.5932e-28	2.04097e-26	3897	ENSG00000198910	L1CAM	L1 cell adhesion molecule	-0.37604	0.00541343	YES
125170	2391.9	2385.18	2175.44	1552.05	1652.74	1627.96	1964.21	-0.513693	0.0604482	-8.49807	1.92773e-17	6.62401e-16	125170	ENSG00000177427	MIEF2	mitochondrial elongation factor 2	-0.0451403	0.726295
342892	307.933	253.416	315.064	209.1	181.972	196.423	243.984	-0.513676	0.123911	-4.14553	3.39026e-05	0.000233963	342892	ENSG00000267041	ZNF850	zinc finger protein 850	-0.384487	0.169966
358	72.6461	54.2455	66.442	50.0661	29.9953	32.0255	50.9034	-0.51359	0.193558	-2.65342	0.007968	0.0280262	358	ENSG00000240583	AQP1	aquaporin 1 (Colton blood group)	0.446522	0.164564
22844	26.0225	24.2891	24.6479	6.87182	13.9978	11.7427	17.9286	-0.51261	0.202954	-2.52575	0.0115452	0.038202	22844	ENSG00000070601	FRMPD1	FERM and PDZ domain containing 1	-0.243985	0.488832
155370	1033.31	884.121	937.69	671.475	651.899	645.848	804.057	-0.512389	0.0799	-6.41288	1.42799e-10	2.36018e-09	155370	ENSG00000225648	SBDSP1	SBDS pseudogene 1	0.425281	0.00053729
157285	2417.92	2580.31	2392.98	1711.08	1676.74	1762.47	2090.25	-0.511949	0.0573512	-8.92657	4.39435e-19	1.75859e-17	157285	ENSG00000275342	PRAG1	PEAK1 related, kinase-activating pseudokinase 1	0.221329	0.0967405
286827	858.741	793.442	782.301	575.27	539.916	566.851	686.087	-0.510882	0.0809878	-6.30813	2.8242e-10	4.51692e-09	286827	ENSG00000213186	TRIM59	tripartite motif containing 59	-0.165615	0.154794
2861	1047.4	1050.1	1100.58	742.157	760.882	714.169	902.548	-0.510704	0.072164	-7.07699	1.47317e-12	3.07044e-11	2861	ENSG00000170775	GPR37	G protein-coupled receptor 37	-2.91733	1.08245e-26
5631	4073.6	3903.25	3910.44	2788.98	2743.57	2767	3364.47	-0.510567	0.048652	-10.4943	9.17913e-26	6.24332e-24	5631	ENSG00000147224	PRPS1	phosphoribosyl pyrophosphate synthetase 1	0.189159	0.107651	YES
56942	588.758	551.361	594.763	402.492	380.941	409.926	488.04	-0.510367	0.0909168	-5.61356	1.98205e-08	2.45941e-07	56942	ENSG00000103121	CMC2	C-X9-C motif containing 2	0.501751	0.000493821	YES
80178	602.854	624.229	580.832	391.694	466.927	384.306	508.474	-0.510108	0.0951301	-5.36221	8.22084e-08	9.1931e-07	80178	ENSG00000162062	TEDC2	tubulin epsilon and delta complex 2	0.314692	0.00727679
558	17360.2	17472.7	17859	11876.5	12247.1	12741.9	14926.2	-0.509893	0.0420107	-12.1372	6.70747e-34	7.39074e-32	558	ENSG00000167601	AXL	AXL receptor tyrosine kinase	-0.0352197	0.827668	YES	YES
6712	3895.78	4141.28	4104.4	2743.82	2979.54	2758.46	3437.21	-0.508919	0.0531346	-9.57793	9.90122e-22	4.92914e-20	6712	ENSG00000173898	SPTBN2	spectrin beta, non-erythrocytic 2	-0.826914	1.5137e-10
5507	812.118	756.199	810.164	563.489	503.922	576.459	670.392	-0.508658	0.0836667	-6.07957	1.20504e-09	1.77196e-08	5507	ENSG00000119938	PPP1R3C	protein phosphatase 1 regulatory subunit 3C	0.55515	0.000289868
60386	296.006	262.322	278.628	184.558	182.972	198.558	233.84	-0.508605	0.120293	-4.22805	2.35729e-05	0.000168591	60386	ENSG00000125454	SLC25A19	solute carrier family 25 member 19	0.0217211	0.915505	YES
1039	1877.95	1706.71	1851.8	1183.92	1320.79	1276.75	1536.32	-0.508592	0.0661428	-7.68929	1.47952e-14	3.92513e-13	1039	ENSG00000140743	CDR2	cerebellar degeneration related protein 2	-0.0552227	0.634873	YES	YES
201254	2057.94	1995.75	2122.93	1412.65	1543.76	1342.94	1746	-0.508522	0.0641232	-7.93039	2.18463e-15	6.31252e-14	201254	ENSG00000169689	CENPX	centromere protein X	0.0955938	0.682651	YES
56776	345.882	390.244	354.715	247.386	254.96	244.461	306.275	-0.507226	0.108858	-4.65952	3.16945e-06	2.70024e-05	56776	ENSG00000155816	FMN2	formin 2	0.22497	0.309686
80380	1272.93	1219.31	1174.52	867.813	768.88	911.659	1035.85	-0.506786	0.0756371	-6.70023	2.08089e-11	3.77945e-10	80380	ENSG00000197646	PDCD1LG2	programmed cell death 1 ligand 2	-0.946321	3.04411e-08
84722	158.303	137.638	176.822	106.022	87.9863	115.292	130.344	-0.506334	0.152951	-3.31044	0.0009315	0.00440278	84722	ENSG00000134222	PSRC1	proline and serine rich coiled-coil 1	0.241602	0.0243208
56479	202.758	195.122	169.32	123.693	125.98	129.17	157.674	-0.505928	0.139064	-3.6381	0.000274658	0.00150266	56479	ENSG00000185760	KCNQ5	potassium voltage-gated channel subfamily Q member 5	-1.78096	2.89537e-13
144715	134.449	99.5851	122.168	91.2971	69.9891	65.1185	97.1011	-0.50574	0.168395	-3.0033	0.00267069	0.0110353	144715	ENSG00000151164	RAD9B	RAD9 checkpoint clamp component B	0.366644	0.179482
100506394	472.741	477.685	500.459	360.28	347.946	287.162	407.712	-0.505055	0.102642	-4.92056	8.62949e-07	8.0855e-06	100506394	ENSG00000272695	GAS6-DT	GAS6 divergent transcript	-0.187203	0.407078
152877	199.506	178.929	166.105	113.876	126.98	121.697	151.182	-0.504929	0.141463	-3.56933	0.000357897	0.00189715	152877	ENSG00000174137	FAM53A	family with sequence similarity 53 member A	0.324261	0.162248	YES
3875	8911.61	8060.73	8654.61	5644.71	6136.05	6177.72	7264.24	-0.50418	0.052294	-9.64126	5.35258e-22	2.73893e-20	3875	ENSG00000111057	KRT18	keratin 18	-0.71784	2.87651e-16
10056	1886.63	1628.18	1826.08	1176.06	1201.81	1341.87	1510.11	-0.504132	0.0721143	-6.99073	2.73466e-12	5.53902e-11	10056	ENSG00000116120	FARSB	phenylalanyl-tRNA synthetase subunit beta	-0.0134286	0.939556	YES
4316	245.045	229.127	278.628	172.777	181.972	151.587	209.856	-0.503978	0.129195	-3.90091	9.58311e-05	0.000592111	4316	ENSG00000137673	MMP7	matrix metallopeptidase 7	-1.49915	6.69546e-07
51728	805.612	771.582	830.525	560.544	575.91	534.826	679.833	-0.503799	0.0804846	-6.25957	3.86045e-10	6.03077e-09	51728	ENSG00000161980	POLR3K	RNA polymerase III subunit K	0.0801714	0.678114	YES
2743	645.14	673.616	696.57	518.332	449.93	424.872	568.077	-0.503673	0.0914231	-5.50925	3.60367e-08	4.28808e-07	2743	ENSG00000109738	GLRB	glycine receptor beta	0.365717	0.00384245
63922	1984.21	2111.53	2134.72	1449.95	1567.76	1334.4	1763.76	-0.503514	0.0663091	-7.59343	3.11549e-14	7.99577e-13	63922	ENSG00000127586	CHTF18	chromosome transmission fidelity factor 18	0.159571	0.104318
29893	932.472	1023.38	1020.21	648.896	700.891	723.776	841.603	-0.503433	0.0774929	-6.49651	8.22046e-11	1.39782e-09	29893	ENSG00000131470	PSMC3IP	PSMC3 interacting protein	0.0481219	0.787826
359845	3933.73	3741.32	3907.22	2627.98	2834.56	2657.05	3283.64	-0.503393	0.0521622	-9.65054	4.88997e-22	2.50998e-20	359845	ENSG00000183688	RFLNB	refilin B	-0.466278	5.1764e-06
7112	4164.68	3784.23	3787.2	2755.6	2531.61	2926.06	3324.9	-0.503103	0.0609401	-8.25569	1.51029e-16	4.75468e-15	7112	ENSG00000120802	TMPO	thymopoietin	-0.0431298	0.733747	YES
9401	2257.45	2326.89	2305.11	1547.14	1770.72	1497.73	1950.84	-0.503091	0.0652795	-7.70672	1.29094e-14	3.45812e-13	9401	ENSG00000160957	RECQL4	RecQ like helicase 4	0.260185	0.00521061
4232	195.169	206.457	182.18	147.253	124.981	118.494	162.422	-0.502615	0.139206	-3.61058	0.000305511	0.00164962	4232	ENSG00000106484	MEST	mesoderm specific transcript	0.632643	4.03545e-06
9791	3221.36	3160.82	3177.43	2137.14	2237.65	2333.59	2711.33	-0.502379	0.0532595	-9.43268	3.99757e-21	1.87704e-19	9791	ENSG00000156471	PTDSS1	phosphatidylserine synthase 1	-0.374061	3.64509e-06	YES
4616	1369.43	1250.08	1332.06	854.069	978.848	922.334	1117.8	-0.502288	0.0724482	-6.93306	4.11833e-12	8.1714e-11	4616	ENSG00000099860	GADD45B	growth arrest and DNA damage inducible beta	0.375599	0.000812488	YES	YES
23500	71.5618	55.8648	69.657	42.2126	27.9956	46.9707	52.3771	-0.501887	0.191844	-2.61612	0.00889349	0.0307514	23500	ENSG00000146122	DAAM2	dishevelled associated activator of morphogenesis 2	-0.534972	0.0773659	YES	YES
1407	1107.04	990.184	874.463	702.889	631.902	726.979	838.909	-0.50187	0.0882232	-5.68864	1.28052e-08	1.64193e-07	1407	ENSG00000008405	CRY1	cryptochrome circadian regulator 1	-0.124671	0.186449	YES
2650	892.354	934.319	933.403	716.633	547.915	651.185	779.301	-0.501267	0.0883637	-5.67277	1.40505e-08	1.79049e-07	2650	ENSG00000187210	GCNT1	glucosaminyl (N-acetyl) transferase 1	0.0133992	0.947541
10797	6241.05	5749.22	6021.58	4141.75	4098.36	4413.11	5110.85	-0.501248	0.0505651	-9.91292	3.65788e-23	2.02199e-21	10797	ENSG00000065911	MTHFD2	methylenetetrahydrofolate dehydrogenase (NADP+ dependent) 2, methenyltetrahydrofolate cyclohydrolase	-0.131517	0.150049
580	884.764	757.818	731.934	570.361	522.919	552.974	670.128	-0.501239	0.088396	-5.67038	1.42479e-08	1.81285e-07	580	ENSG00000138376	BARD1	BRCA1 associated RING domain 1	-0.152792	0.244981
91608	433.708	495.497	481.169	312.177	351.945	309.58	397.346	-0.500709	0.101636	-4.92651	8.37108e-07	7.86567e-06	91608	ENSG00000270885	RASL10B	RAS like family 10 member B	-0.0385614	0.885612
285382	68.309	54.2455	48.2241	35.3408	31.995	33.093	45.2012	-0.500657	0.19419	-2.57818	0.00993225	0.0336877	285382	ENSG00000187068	C3orf70	chromosome 3 open reading frame 70	0.793499	0.00101618
11178	2073.12	2124.48	2149.72	1430.32	1502.77	1522.28	1800.45	-0.500581	0.0579075	-8.64449	5.40476e-18	1.98071e-16	11178	ENSG00000061337	LZTS1	leucine zipper tumor suppressor 1	-0.375819	0.0291432
837	1663.27	1460.58	1592.47	1075.93	1162.82	1056.84	1335.32	-0.499732	0.0698462	-7.15475	8.3824e-13	1.80162e-11	837	ENSG00000196954	CASP4	caspase 4	-1.20921	5.40154e-21
100507421	5308.58	5226.19	5397.88	3907.12	3489.46	3809.97	4523.2	-0.499194	0.051881	-9.62191	6.46199e-22	3.26617e-20	100507421	ENSG00000261115	TMEM178B	transmembrane protein 178B	-0.478601	0.000699887
100506697	36.8652	39.6721	49.2957	22.5788	15.9975	29.8905	32.3833	-0.497522	0.202721	-2.45422	0.014119	0.045132	100506697	ENSG00000232977	LINC00327	long intergenic non-protein coding RNA 327	0.601392	0.059103
80014	4377.2	4372.84	4363.74	3211.1	3003.53	3028.54	3726.16	-0.497173	0.0488508	-10.1774	2.50246e-24	1.53757e-22	80014	ENSG00000151718	WWC2	WW and C2 domain containing 2	-0.488812	6.76237e-07	YES
8710	538.882	451.776	512.247	350.463	353.945	333.065	423.396	-0.497139	0.0997416	-4.98427	6.21964e-07	5.99756e-06	8710	ENSG00000166396	SERPINB7	serpin family B member 7	-0.139503	0.467128
58512	59.6348	53.4359	56.7972	27.4873	35.9944	37.3631	45.1188	-0.496283	0.193631	-2.56303	0.0103763	0.0348718	58512	ENSG00000116544	DLGAP3	DLG associated protein 3	-0.469292	0.185166
8706	490.09	531.121	474.739	330.829	289.955	410.994	421.288	-0.496281	0.11096	-4.47261	7.72713e-06	6.12243e-05	8706	ENSG00000169255	B3GALNT1	beta-1,3-N-acetylgalactosaminyltransferase 1 (globoside blood group)	-1.23645	5.59342e-20
284403	1244.74	1393.38	1303.12	875.667	965.85	925.537	1118.05	-0.495942	0.0715308	-6.93327	4.11223e-12	8.1691e-11	284403	ENSG00000075702	WDR62	WD repeat domain 62	-0.119056	0.359478
3336	834.887	713.288	738.364	548.764	473.926	566.851	646.014	-0.495852	0.0911575	-5.43951	5.34288e-08	6.19264e-07	3336	ENSG00000115541	HSPE1	heat shock protein family E (Hsp10) member 1	-0.100781	0.819147	YES
140707	497.68	543.265	488.67	321.994	406.937	329.863	431.401	-0.495459	0.103919	-4.76772	1.86322e-06	1.65388e-05	140707	ENSG00000184992	BRI3BP	BRI3 binding protein	-0.47036	0.00164063
23576	4989.81	4754.18	4812.76	3365.23	3333.48	3577.25	4138.78	-0.494871	0.0495512	-9.98707	1.73635e-23	9.99953e-22	23576	ENSG00000153904	DDAH1	dimethylarginine dimethylaminohydrolase 1	-0.242273	0.0110063	YES
79070	799.107	658.233	765.155	563.489	456.929	520.948	627.31	-0.494588	0.0956579	-5.17039	2.33611e-07	2.41925e-06	79070	ENSG00000134901	POGLUT2	protein O-glucosyltransferase 2	0.553486	1.65056e-05
84930	989.938	979.658	1073.79	666.567	737.885	726.979	862.469	-0.494565	0.0766695	-6.45061	1.114e-10	1.86358e-09	84930	ENSG00000120539	MASTL	microtubule associated serine/threonine kinase like	0.776459	1.23492e-16
83468	236.371	214.553	210.043	152.162	150.977	145.182	184.881	-0.494395	0.130332	-3.79334	0.000148634	0.000870832	83468	ENSG00000120820	GLT8D2	glycosyltransferase 8 domain containing 2	0.0164649	0.945209
55750	433.708	404.008	414.727	270.946	262.959	330.93	352.88	-0.494218	0.10841	-4.55877	5.14549e-06	4.23108e-05	55750	ENSG00000006530	AGK	acylglycerol kinase	0.377052	0.0290363	YES
1736	2439.61	2366.56	2485.15	1636.48	1796.72	1706.96	2071.91	-0.493573	0.0578641	-8.52985	1.46532e-17	5.12025e-16	1736	ENSG00000130826	DKC1	dyskerin pseudouridine synthase 1	-0.128339	0.217426	YES
100652988	37.9494	23.4794	39.6509	20.6155	13.9978	16.0127	25.2843	-0.493529	0.204657	-2.41149	0.0158874	0.0497325	100652988	NA	LINC00702	long intergenic non-protein coding RNA 702	0.536841	0.0899252
5106	2575.14	2691.23	2714.48	1669.85	2008.69	1939.68	2266.51	-0.493375	0.0660876	-7.46547	8.30041e-14	2.02344e-12	5106	ENSG00000100889	PCK2	phosphoenolpyruvate carboxykinase 2, mitochondrial	-0.528708	1.41931e-08	YES
222658	7255.93	6427.69	6689.21	4860.34	4585.29	4936.2	5792.44	-0.4932	0.0536556	-9.19196	3.85753e-20	1.64323e-18	222658	ENSG00000112078	KCTD20	potassium channel tetramerization domain containing 20	0.0425555	0.700375
3164	382.747	381.338	350.428	254.257	282.956	231.651	313.896	-0.492959	0.110618	-4.45641	8.33452e-06	6.55654e-05	3164	ENSG00000123358	NR4A1	nuclear receptor subfamily 4 group A member 1	-0.272717	0.0925729	YES	YES
10953	3024.03	2763.28	2962.03	1943.74	2131.67	2093.4	2486.36	-0.492917	0.05851	-8.42449	3.62325e-17	1.22214e-15	10953	ENSG00000025772	TOMM34	translocase of outer mitochondrial membrane 34	0.123717	0.292184	YES
1870	142.039	145.734	143.601	89.3337	89.986	107.819	119.752	-0.492317	0.151824	-3.24269	0.00118409	0.00545143	1870	ENSG00000007968	E2F2	E2F transcription factor 2	-0.104364	0.624581
5831	4904.15	4935.53	4877.06	3269.02	3681.43	3453.42	4186.77	-0.492236	0.0520739	-9.45264	3.30376e-21	1.55569e-19	5831	ENSG00000183010	PYCR1	pyrroline-5-carboxylate reductase 1	-0.0238621	0.855396
79623	2861.39	2994.03	2889.16	2078.24	2105.67	1997.32	2487.63	-0.492225	0.0532894	-9.23681	2.53946e-20	1.11332e-18	79623	ENSG00000158089	GALNT14	polypeptide N-acetylgalactosaminyltransferase 14	-0.922661	5.10675e-22
200916	1842.17	1573.12	1805.72	1199.62	1199.81	1269.28	1481.62	-0.491985	0.07012	-7.01633	2.27772e-12	4.64589e-11	200916	ENSG00000163584	RPL22L1	ribosomal protein L22 like 1	0.532835	0.00191679	YES
10389	197.337	198.361	190.753	150.198	129.98	115.292	163.653	-0.491809	0.138755	-3.54444	0.000393455	0.00206053	10389	ENSG00000102098	SCML2	Scm polycomb group protein like 2	0.451781	0.000746838
64283	3875.18	3568.06	3696.11	2666.27	2553.6	2659.18	3169.73	-0.490568	0.0524782	-9.34804	8.92889e-21	4.05431e-19	64283	ENSG00000214944	ARHGEF28	Rho guanine nucleotide exchange factor 28	-0.577558	1.11519e-05	YES
3850	30.3595	26.718	32.1494	23.5605	8.9986	8.54013	21.721	-0.490199	0.203623	-2.40738	0.0160674	0.0501439	3850	ENSG00000186442	KRT3	keratin 3	0.241808	0.532651
80004	486.837	488.21	488.67	328.866	339.947	352.28	414.135	-0.490192	0.0952417	-5.14683	2.64928e-07	2.7179e-06	80004	ENSG00000103067	ESRP2	epithelial splicing regulatory protein 2	-2.70425	8.59402e-59
64399	178.904	181.358	168.248	136.455	114.982	103.549	147.25	-0.489917	0.144201	-3.39747	0.000680126	0.00335056	64399	ENSG00000164161	HHIP	hedgehog interacting protein	-1.44838	1.05742e-17
79633	396.843	425.868	414.727	295.488	246.962	315.985	349.312	-0.489317	0.108628	-4.50453	6.65193e-06	5.35785e-05	79633	ENSG00000196159	FAT4	FAT atypical cadherin 4	-0.514533	0.013989	YES
11130	2682.48	2585.97	2756.27	1869.14	1960.7	1847.87	2283.74	-0.488928	0.055555	-8.80078	1.35865e-18	5.24666e-17	11130	ENSG00000122952	ZWINT	ZW10 interacting kinetochore protein	0.641835	1.46295e-13	YES
6502	1426.9	1195.83	1276.33	928.678	922.856	891.376	1107	-0.487607	0.0750088	-6.50066	7.99665e-11	1.36116e-09	6502	ENSG00000145604	SKP2	S-phase kinase associated protein 2	0.201212	0.0236544
8654	146.376	136.828	127.526	87.3703	80.9874	104.617	113.951	-0.486811	0.155981	-3.12096	0.00180263	0.00783843	8654	ENSG00000138735	PDE5A	phosphodiesterase 5A	-1.05423	0.000376314
114801	316.607	314.948	324.709	214.99	202.968	243.394	269.603	-0.4868	0.114977	-4.23389	2.29688e-05	0.0001652	114801	ENSG00000164484	TMEM200A	transmembrane protein 200A	-2.37493	4.37003e-16
1894	2355.03	2105.05	2242.95	1622.73	1471.77	1643.98	1906.92	-0.486795	0.0643519	-7.56457	3.89151e-14	9.83468e-13	1894	ENSG00000114346	ECT2	epithelial cell transforming 2	0.306226	7.53171e-05
30820	24.9382	31.5758	30.0061	6.87182	22.9964	9.60765	20.9993	-0.486557	0.203005	-2.39677	0.0165401	0.0513285	30820	ENSG00000182132	KCNIP1	potassium voltage-gated channel interacting protein 1	1.29841	3.97736e-19
9933	1822.66	1548.83	1670.7	1226.13	1107.83	1222.31	1433.07	-0.486174	0.071921	-6.75983	1.38153e-11	2.56562e-10	9933	ENSG00000080608	PUM3	pumilio RNA binding family member 3	-0.251842	0.0217316	YES
9532	1821.57	1590.93	1687.84	1161.34	1242.81	1198.82	1450.55	-0.48601	0.0673351	-7.21778	5.28429e-13	1.16071e-11	9532	ENSG00000112208	BAG2	BAG cochaperone 2	0.36275	0.00129581
6540	35.7809	27.5276	30.0061	14.7253	15.9975	17.0803	23.5196	-0.48547	0.204633	-2.3724	0.0176732	0.0541823	6540	ENSG00000010379	SLC6A13	solute carrier family 6 member 13	0.203803	NA	YES
4919	1587.37	1429.82	1408.14	1034.7	963.85	1127.3	1258.53	-0.484523	0.0738087	-6.56458	5.21805e-11	9.0119e-10	4919	ENSG00000185483	ROR1	receptor tyrosine kinase like orphan receptor 1	-0.557169	2.43548e-06	YES
401024	9.75843	7.28672	17.1463	1.96338	0.999845	2.13503	6.54829	-0.484518	0.167296	-2.89617	0.00377752	0.0149258	401024	ENSG00000188738	FSIP2	fibrous sheath interacting protein 2	0.0236211	NA
27127	94.3314	76.9153	67.5137	48.1028	47.9925	54.4433	64.8832	-0.484307	0.181857	-2.66313	0.00774182	0.0273587	27127	ENSG00000077935	SMC1B	structural maintenance of chromosomes 1B	-0.1484	0.7249
65078	528.039	488.21	474.739	318.067	351.945	372.563	422.261	-0.484209	0.0989911	-4.89144	1.001e-06	9.28943e-06	65078	ENSG00000040608	RTN4R	reticulon 4 receptor	0.158572	0.338871
117289	24.9382	29.9565	18.218	9.81689	11.9981	11.7427	17.7784	-0.483735	0.202896	-2.38415	0.0171187	0.0527966	117289	ENSG00000164691	TAGAP	T cell activation RhoGTPase activating protein	-0.0283207	NA
64425	1252.33	1135.92	1250.61	811.857	903.859	854.013	1034.76	-0.483598	0.0733641	-6.59175	4.34684e-11	7.56259e-10	64425	ENSG00000137054	POLR1E	RNA polymerase I subunit E	-0.205202	0.105284
100996465	44.455	42.9107	37.5076	19.6338	21.9966	28.8229	32.5544	-0.483529	0.201673	-2.39759	0.0165035	0.0512341	100996465	ENSG00000273769	LCA10	lung carcinoma-associated 10	-0.0741926	NA
9582	1251.25	1231.45	1300.98	954.202	840.869	880.701	1076.58	-0.483372	0.0711011	-6.79837	1.05811e-11	2.00096e-10	9582	ENSG00000179750	APOBEC3B	apolipoprotein B mRNA editing enzyme catalytic subunit 3B	0.159332	0.123483
9365	58.5506	59.913	49.2957	34.3591	33.9947	33.093	44.8677	-0.483057	0.193207	-2.50021	0.0124121	0.040527	9365	ENSG00000133116	KL	klotho	-0.301191	0.266455
644192	146.376	152.211	159.675	104.059	111.983	91.8064	127.685	-0.482544	0.148857	-3.24166	0.00118834	0.00546643	644192	ENSG00000247809	NR2F2-AS1	NR2F2 antisense RNA 1	0.218208	0.50087
1164	1239.32	1168.3	1253.83	806.948	1005.84	763.274	1039.59	-0.48213	0.0865672	-5.56943	2.5558e-08	3.12443e-07	1164	ENSG00000123975	CKS2	CDC28 protein kinase regulatory subunit 2	0.460071	0.00073132
2187	200.59	195.932	204.684	148.235	102.984	155.857	168.047	-0.481006	0.14437	-3.33175	0.000863027	0.00412257	2187	ENSG00000181544	FANCB	FA complementation group B	0.258597	0.210942
100507392	103.006	131.161	97.5198	55.9563	97.9848	58.7134	90.7234	-0.480718	0.178465	-2.69362	0.00706799	0.0253185	100507392	ENSG00000254703	SENCR	smooth muscle and endothelial cell enriched migration/differentiation-associated lncRNA	-0.752738	0.0121044
3329	12580.8	11449.9	11758.1	8421.91	8204.72	8921.24	10222.8	-0.478958	0.0494317	-9.68928	3.34866e-22	1.74595e-20	3329	ENSG00000144381	HSPD1	heat shock protein family D (Hsp60) member 1	-0.083596	0.394915	YES
547	44.455	43.7203	39.6509	22.5788	29.9953	20.2828	33.4472	-0.477634	0.201147	-2.37455	0.0175704	0.0539181	547	ENSG00000130294	KIF1A	kinesin family member 1A	-0.121591	NA
55652	2369.13	2378.71	2306.18	1616.84	1719.73	1700.55	2015.19	-0.476982	0.0561039	-8.50175	1.86753e-17	6.44394e-16	55652	ENSG00000211584	SLC48A1	solute carrier family 48 member 1	-0.175635	0.197996	YES	YES
5881	607.191	666.33	621.555	381.877	508.921	443.019	538.149	-0.47659	0.0992458	-4.80212	1.56997e-06	1.41101e-05	5881	ENSG00000169750	RAC3	Rac family small GTPase 3	0.192258	0.263168
1978	4437.91	4606.01	4648.8	2998.08	3451.46	3329.58	3911.98	-0.47656	0.0563039	-8.46406	2.58221e-17	8.79975e-16	1978	ENSG00000187840	EIF4EBP1	eukaryotic translation initiation factor 4E binding protein 1	-0.093935	0.474706
40	36.8652	34.8143	28.9344	15.707	20.9967	17.0803	25.733	-0.476536	0.204285	-2.3327	0.0196637	0.0591664	40	ENSG00000108684	ASIC2	acid sensing ion channel subunit 2	0.808069	0.000312153	YES
348235	2772.48	2493.68	2705.91	1939.82	1810.72	1933.27	2275.98	-0.47645	0.0595781	-7.99706	1.27421e-15	3.74069e-14	348235	ENSG00000182628	SKA2	spindle and kinetochore associated complex subunit 2	0.342834	0.000132238	YES
2237	5748.8	5317.68	5655.07	3917.92	4143.36	3904.98	4781.3	-0.474751	0.0500644	-9.48282	2.47508e-21	1.19614e-19	2237	ENSG00000168496	FEN1	flap structure-specific endonuclease 1	0.150193	0.131455
65124	1818.32	1736.67	1830.37	1209.44	1302.8	1331.19	1538.13	-0.474474	0.0629444	-7.53799	4.77282e-14	1.19342e-12	65124	ENSG00000198142	SOWAHC	sosondowah ankyrin repeat domain family member C	-0.29642	0.0122864	YES	YES
24	42.2865	42.101	48.2241	25.5239	27.9956	23.4854	34.9361	-0.473474	0.199768	-2.37012	0.0177821	0.0543659	24	ENSG00000198691	ABCA4	ATP binding cassette subfamily A member 4	-0.702037	0.0211336
10981	3595.44	3436.09	3644.67	2515.09	2666.59	2459.56	3052.9	-0.473409	0.0533357	-8.87603	6.92908e-19	2.74638e-17	10981	ENSG00000118508	RAB32	RAB32, member RAS oncogene family	0.243859	0.048941
692213	65.0562	58.2937	72.8719	46.1394	34.9946	40.5656	52.9869	-0.473331	0.188753	-2.50767	0.012153	0.0398075	692213	ENSG00000221116	SNORD110	small nucleolar RNA, C/D box 110	-0.186463	0.635386
4645	627.792	655.804	635.486	482.009	426.934	451.56	546.597	-0.472996	0.0876735	-5.39497	6.85354e-08	7.7906e-07	4645	ENSG00000167306	MYO5B	myosin VB	-0.962754	1.67883e-08	YES
29767	341.545	359.478	355.786	265.056	244.962	230.584	299.568	-0.472912	0.10956	-4.31645	1.5856e-05	0.00011773	29767	ENSG00000128872	TMOD2	tropomodulin 2	1.35539	2.27354e-19	YES
27123	89.9944	73.6768	82.5167	46.1394	52.9918	58.7134	67.3387	-0.472709	0.179311	-2.63626	0.00838266	0.0292915	27123	ENSG00000155011	DKK2	dickkopf WNT signaling pathway inhibitor 2	-0.519066	0.136855	YES
27	6259.49	6013.16	6375.22	4447.05	4183.35	4735.5	5335.63	-0.47224	0.0527083	-8.95949	3.26184e-19	1.32136e-17	27	ENSG00000143322	ABL2	ABL proto-oncogene 2, non-receptor tyrosine kinase	-0.240977	0.0668939	YES
10631	710.196	669.568	699.785	504.588	422.934	543.366	591.74	-0.472046	0.0932637	-5.06142	4.16156e-07	4.12611e-06	10631	ENSG00000133110	POSTN	periostin	-0.289091	0.11693
79017	1500.63	1413.62	1477.8	1071.02	1039.84	1025.88	1254.8	-0.471976	0.0645837	-7.30797	2.71206e-13	6.19986e-12	79017	ENSG00000006625	GGCT	gamma-glutamylcyclotransferase	0.169831	0.274944
4217	839.225	871.167	819.809	613.556	632.902	552.974	721.605	-0.471878	0.0809141	-5.83184	5.4819e-09	7.39028e-08	4217	ENSG00000197442	MAP3K5	mitogen-activated protein kinase kinase kinase 5	-0.598353	0.00239969	YES	YES
3764	189.747	177.31	190.753	125.656	132.979	123.832	156.713	-0.471705	0.137518	-3.43013	0.0006033	0.00300794	3764	ENSG00000121361	KCNJ8	potassium inwardly rectifying channel subfamily J member 8	-0.615508	0.0467366
7594	75.8989	86.6309	91.0899	56.938	54.9914	52.3083	69.6429	-0.471685	0.176631	-2.67046	0.00757481	0.0268431	7594	ENSG00000198521	ZNF43	zinc finger protein 43	1.03088	4.7317e-05
158228	66.1404	72.0575	63.2271	45.1577	36.9942	44.8357	54.7354	-0.471393	0.186577	-2.52653	0.0115195	0.0381399	158228	NA	FAM201A	family with sequence similarity 201 member A	-0.098208	0.688615
26150	176.736	174.072	177.893	113.876	139.978	106.752	148.218	-0.471008	0.143702	-3.27767	0.00104668	0.0048924	26150	ENSG00000128408	RIBC2	RIB43A domain with coiled-coils 2	-0.101709	0.74048
8507	13664	13073.2	13243.4	9647.06	9326.55	9770.98	11454.2	-0.470888	0.041795	-11.2666	1.91779e-29	1.6509e-27	8507	ENSG00000171617	ENC1	ectodermal-neural cortex 1	-0.514664	1.00945e-08	YES
83592	149.629	160.308	183.251	93.2605	124.981	116.359	137.965	-0.470519	0.149846	-3.14002	0.00168938	0.00742607	83592	ENSG00000165568	AKR1E2	aldo-keto reductase family 1 member E2	0.270859	0.423455
1468	2587.07	2732.52	2657.68	1801.4	2044.68	1873.49	2282.81	-0.470063	0.0596882	-7.87531	3.39897e-15	9.53788e-14	1468	ENSG00000183048	SLC25A10	solute carrier family 25 member 10	0.188069	0.107145
57181	2461.29	2438.62	2469.07	1791.58	1580.75	1904.45	2107.63	-0.469565	0.0651756	-7.20461	5.82086e-13	1.27427e-11	57181	ENSG00000196950	SLC39A10	solute carrier family 39 member 10	-0.368129	0.00728594	YES
283643	808.865	926.222	926.974	621.409	664.897	610.619	759.831	-0.469501	0.0819352	-5.73015	1.00342e-08	1.31206e-07	283643	ENSG00000185347	TEDC1	tubulin epsilon and delta complex 1	-0.215366	0.198588
10715	75.8989	75.2961	66.442	47.1211	48.9924	42.7007	59.4085	-0.469129	0.18306	-2.5627	0.0103861	0.0348906	10715	ENSG00000223802	CERS1	ceramide synthase 1	0.443036	0.217185
112597	1185.11	1051.72	1218.46	823.637	883.863	750.464	985.541	-0.469097	0.0802401	-5.84616	5.03036e-09	6.8149e-08	112597	ENSG00000222041	CYTOR	cytoskeleton regulator RNA	-0.15604	0.527865
6662	906.449	930.271	921.615	660.677	622.903	687.481	788.233	-0.468291	0.0760867	-6.15469	7.52227e-10	1.13026e-08	6662	ENSG00000125398	SOX9	SRY-box transcription factor 9	-1.99145	6.69473e-25
641	483.584	490.639	454.378	344.573	337.947	329.863	406.831	-0.468227	0.0965274	-4.85071	1.23019e-06	1.11779e-05	641	ENSG00000197299	BLM	BLM RecQ like helicase	0.301939	0.00487178
10683	91.0786	87.4406	126.454	64.7915	67.9894	66.186	83.9901	-0.467905	0.173177	-2.70188	0.00689477	0.0247894	10683	ENSG00000090932	DLL3	delta like canonical Notch ligand 3	0.0757667	0.793602
7126	7293.88	6914.28	7062.15	5100.86	5091.21	5125.15	6097.92	-0.467854	0.0439203	-10.6523	1.70035e-26	1.21135e-24	7126	ENSG00000109079	TNFAIP1	TNF alpha induced protein 1	-0.277522	0.000854161	YES
4522	5624.11	5221.34	5439.67	3814.84	3834.4	4066.17	4666.76	-0.467683	0.0498638	-9.3792	6.64778e-21	3.06057e-19	4522	ENSG00000100714	MTHFD1	methylenetetrahydrofolate dehydrogenase, cyclohydrolase and formyltetrahydrofolate synthetase 1	-0.441678	7.68263e-09	YES
11279	23.8539	17.812	36.436	9.81689	16.9974	8.54013	18.9094	-0.46768	0.202162	-2.31339	0.020701	0.0618485	11279	ENSG00000102349	KLF8	Kruppel like factor 8	-0.662536	0.0239429
64793	954.157	839.591	921.615	627.299	663.897	643.712	775.045	-0.467609	0.079336	-5.89404	3.76861e-09	5.20364e-08	64793	ENSG00000130695	CEP85	centrosomal protein 85	-0.188483	0.167105	YES
64946	662.489	567.554	611.91	460.412	410.936	434.479	524.63	-0.466758	0.0927104	-5.03458	4.78905e-07	4.70591e-06	64946	ENSG00000153044	CENPH	centromere protein H	0.561214	5.59224e-07
55106	1421.48	1264.65	1222.75	948.312	857.867	987.453	1117.08	-0.46654	0.0768566	-6.07027	1.27694e-09	1.87269e-08	55106	ENSG00000172123	SLFN12	schlafen family member 12	-0.0284196	0.840195
9521	246.129	181.358	199.326	151.18	122.981	154.79	175.961	-0.466334	0.142591	-3.27044	0.00107381	0.00500787	9521	ENSG00000124802	EEF1E1	eukaryotic translation elongation factor 1 epsilon 1	0.316246	0.0137975	YES
10592	3456.65	3223.97	3325.32	2445.39	2259.65	2491.58	2867.09	-0.466057	0.0558112	-8.3506	6.79179e-17	2.20107e-15	10592	ENSG00000136824	SMC2	structural maintenance of chromosomes 2	0.0796058	0.503974	YES
54206	2732.36	2383.57	2597.67	1871.1	1684.74	1973.84	2207.21	-0.465894	0.0678026	-6.87132	6.36109e-12	1.23835e-10	54206	ENSG00000116285	ERRFI1	ERBB receptor feedback inhibitor 1	-0.526596	1.4306e-06	YES
8458	884.764	819.351	946.263	676.384	582.909	628.767	756.406	-0.465602	0.0840798	-5.53762	3.06614e-08	3.68561e-07	8458	ENSG00000116830	TTF2	transcription termination factor 2	0.242918	0.0701312	YES
57559	311.185	326.283	304.347	212.045	237.963	212.436	267.377	-0.465488	0.114294	-4.07273	4.64646e-05	0.000309789	57559	ENSG00000138134	STAMBPL1	STAM binding protein like 1	0.579198	0.000162983
2653	838.14	782.107	788.731	568.398	596.907	555.109	688.232	-0.465083	0.0800887	-5.8071	6.35659e-09	8.50014e-08	2653	ENSG00000140905	GCSH	glycine cleavage system protein H	0.076064	0.672308	YES
148206	472.741	500.354	487.599	379.914	302.953	352.28	415.974	-0.464929	0.101506	-4.58032	4.64269e-06	3.8502e-05	148206	ENSG00000160352	ZNF714	zinc finger protein 714	-0.255062	0.10185
9816	937.893	840.401	931.26	623.373	660.897	651.185	774.168	-0.464668	0.0788883	-5.8902	3.85718e-09	5.31705e-08	9816	ENSG00000135763	URB2	URB2 ribosome biogenesis homolog	-0.314386	0.00752725
93649	731.882	702.763	742.65	481.028	501.922	570.054	621.716	-0.464632	0.0868047	-5.35261	8.66925e-08	9.66185e-07	93649	ENSG00000141052	MYOCD	myocardin	-1.17288	5.54344e-05
29107	1203.54	1109.2	1192.74	833.454	854.867	824.123	1002.99	-0.464147	0.0704713	-6.58633	4.50827e-11	7.82696e-10	29107	ENSG00000132661	NXT1	nuclear transport factor 2 like export factor 1	-0.155749	0.340476
9935	94.3314	141.686	111.451	90.3154	83.9869	53.3758	95.8578	-0.463679	0.175775	-2.63791	0.00834181	0.0291857	9935	ENSG00000204103	MAFB	MAF bZIP transcription factor B	NA	NA	YES	YES
6059	3618.21	3225.59	3309.24	2507.23	2261.65	2536.42	2909.72	-0.463538	0.0611267	-7.58324	3.3704e-14	8.58336e-13	6059	ENSG00000164163	ABCE1	ATP binding cassette subfamily E member 1	-0.319292	0.000498197	YES
23225	3133.54	3124.38	3309.24	2251.01	2322.64	2326.12	2744.49	-0.46344	0.0522888	-8.86309	7.78257e-19	3.06263e-17	23225	ENSG00000132182	NUP210	nucleoporin 210	-0.848349	8.12431e-15
51444	1200.29	1082.48	1057.71	845.234	734.886	811.313	955.319	-0.463201	0.0780461	-5.93496	2.93915e-09	4.11681e-08	51444	ENSG00000134758	RNF138	ring finger protein 138	0.0936841	0.338026	YES
84553	265.646	287.42	271.126	190.448	194.97	194.288	233.983	-0.462447	0.118719	-3.8953	9.80754e-05	0.000604847	84553	ENSG00000146267	FAXC	failed axon connections homolog, metaxin like GST domain containing	0.548075	0.000438011
22800	5926.62	5596.2	5793.32	4156.47	4157.35	4198.54	4971.42	-0.462428	0.0456763	-10.124	4.32257e-24	2.61698e-22	22800	ENSG00000133818	RRAS2	RAS related 2	0.0186794	0.865271	YES
2271	1678.45	1586.88	1672.84	1129.92	1212.81	1210.56	1415.25	-0.4624	0.0635786	-7.27289	3.51881e-13	7.92355e-12	2271	ENSG00000091483	FH	fumarate hydratase	0.178944	0.113665	YES
56944	265.646	229.936	234.69	193.393	153.976	160.127	206.295	-0.462004	0.130327	-3.54498	0.00039265	0.00205762	56944	ENSG00000116774	OLFML3	olfactomedin like 3	0.00966749	0.97591
2171	1305.46	1063.86	1317.05	798.113	967.849	862.553	1052.48	-0.461998	0.0880268	-5.24838	1.53445e-07	1.64471e-06	2171	ENSG00000164687	FABP5	fatty acid binding protein 5	-0.517847	0.000110543
54982	1976.62	1973.08	2003.98	1356.69	1504.77	1429.4	1707.42	-0.461947	0.0604362	-7.64356	2.11299e-14	5.49111e-13	54982	ENSG00000128973	CLN6	CLN6 transmembrane ER protein	-0.227506	0.0225646
5939	2916.68	2764.09	2881.66	2080.2	1948.7	2146.78	2456.35	-0.461943	0.0563508	-8.19762	2.45188e-16	7.60314e-15	5939	ENSG00000076067	RBMS2	RNA binding motif single stranded interacting protein 2	-0.675734	1.19682e-06	YES
57835	386	340.047	377.219	286.653	225.965	263.677	313.26	-0.461913	0.113608	-4.06585	4.78576e-05	0.000317717	57835	ENSG00000188687	SLC4A5	solute carrier family 4 member 5	0.174824	0.611534
283481	42.2865	29.9565	32.1494	21.5972	14.9977	20.2828	26.8783	-0.461424	0.204197	-2.2597	0.0238399	0.069739	283481	ENSG00000272143	FGF14-AS2	FGF14 antisense RNA 2	-0.760511	0.0175493
9709	3251.72	3087.14	3256.73	2343.29	2217.66	2366.68	2753.87	-0.461296	0.0534875	-8.62436	6.44514e-18	2.32588e-16	9709	ENSG00000051108	HERPUD1	homocysteine inducible ER protein with ubiquitin like domain 1	-0.462905	8.83229e-06	YES	YES
80000	594.18	523.834	575.474	389.731	422.934	392.846	483.166	-0.460768	0.0933541	-4.9357	7.98618e-07	7.53879e-06	80000	ENSG00000141449	GREB1L	GREB1 like retinoic acid receptor coactivator	0.45631	0.00021811
55861	82.4045	81.7731	97.5198	48.1028	62.9902	59.7809	72.0952	-0.46059	0.176921	-2.60337	0.00923127	0.0317286	55861	ENSG00000244274	DBNDD2	dysbindin domain containing 2	0.451367	0.124414	YES	YES
105377170	103.006	134.399	110.38	91.2971	76.988	64.051	96.6868	-0.460568	0.167595	-2.74811	0.00599403	0.0221406	105377170	NA	NA	NA	-0.0113481	NA
25886	917.292	953.75	968.768	666.567	697.891	676.806	813.512	-0.460359	0.0743361	-6.19295	5.90502e-10	8.97042e-09	25886	ENSG00000164087	POC1A	POC1 centriolar protein A	0.323546	0.000507067
7804	635.382	662.281	689.068	473.174	467.927	481.45	568.214	-0.460345	0.0850655	-5.41165	6.24458e-08	7.13765e-07	7804	ENSG00000157193	LRP8	LDL receptor related protein 8	-0.587533	8.12588e-08
91607	2450.45	2463.72	2440.14	1879.93	1621.75	1804.1	2110.02	-0.460275	0.0614289	-7.49281	6.7414e-14	1.66053e-12	91607	ENSG00000172716	SLFN11	schlafen family member 11	0.0374324	0.770426
899	1626.4	1680.8	1746.78	1195.7	1288.8	1157.19	1449.28	-0.460207	0.0650593	-7.07367	1.50894e-12	3.14103e-11	899	ENSG00000162063	CCNF	cyclin F	-0.338539	0.00641475
10969	2363.71	2199.78	2145.43	1579.54	1638.75	1624.76	1925.33	-0.459769	0.0592541	-7.75927	8.54185e-15	2.32586e-13	10969	ENSG00000117395	EBNA1BP2	EBNA1 binding protein 2	-0.202069	0.134225	YES
84131	1426.9	1292.99	1347.06	1021.94	959.851	943.685	1165.4	-0.459631	0.0691616	-6.64575	3.01675e-11	5.36139e-10	84131	ENSG00000148019	CEP78	centrosomal protein 78	0.0243474	0.877726
26084	2.16854	44.5299	4.28658	0.981689	1.99969	2.13503	9.35024	-0.459454	0.156055	-2.94418	0.00323812	0.0130282	26084	ENSG00000114790	ARHGEF26	Rho guanine nucleotide exchange factor 26	-0.402188	0.209291
1396	24.9382	28.3372	30.0061	12.762	17.9972	11.7427	20.9639	-0.459396	0.2045	-2.24644	0.0246758	0.0717146	1396	ENSG00000213145	CRIP1	cysteine rich protein 1	-1.01189	0.0014735	YES
340075	4254.67	4811.66	4417.32	3136.5	3426.47	3187.6	3872.37	-0.459084	0.0573577	-8.00387	1.20571e-15	3.55222e-14	340075	ENSG00000183876	ARSI	arylsulfatase family member I	0.145455	0.263045
5836	4555.02	4201.2	4499.84	3184.6	3108.52	3301.83	3808.5	-0.458148	0.0517632	-8.85085	8.68532e-19	3.39577e-17	5836	ENSG00000100504	PYGL	glycogen phosphorylase L	-0.0397221	0.803419
139886	878.258	910.03	883.036	662.64	577.91	680.008	765.314	-0.457777	0.0808633	-5.66112	1.50391e-08	1.90326e-07	139886	ENSG00000186767	SPIN4	spindlin family member 4	-0.55026	0.00772204
8624	1398.71	1258.17	1384.57	982.671	986.847	940.482	1158.57	-0.457753	0.0693725	-6.59847	4.15424e-11	7.26285e-10	8624	ENSG00000183527	PSMG1	proteasome assembly chaperone 1	0.251508	0.0935234	YES
4958	6.50562	7.28672	12.8597	0	0	1.06752	4.61993	-0.457702	0.149148	-3.06877	0.0021494	NA	4958	ENSG00000127083	OMD	osteomodulin	NA	NA
9411	13891.7	12319.4	12527.5	9335.86	8711.65	9981.28	11127.9	-0.457555	0.0569114	-8.03977	9.00083e-16	2.67564e-14	9411	ENSG00000137962	ARHGAP29	Rho GTPase activating protein 29	-1.25216	2.52311e-33	YES
5393	1143.9	1083.29	1084.51	803.022	778.879	804.907	949.752	-0.457486	0.0704892	-6.49016	8.57474e-11	1.45506e-09	5393	ENSG00000123737	EXOSC9	exosome component 9	0.0299382	0.801498	YES
80851	3974.93	3997.98	4138.7	2894.02	3060.52	2819.31	3480.91	-0.457388	0.0511933	-8.93452	4.08943e-19	1.64054e-17	80851	ENSG00000175137	SH3BP5L	SH3 binding domain protein 5 like	0.131557	0.163601	YES	YES
64116	2482.98	2475.86	2372.62	1777.84	1779.72	1751.79	2106.8	-0.457347	0.0545734	-8.3804	5.27462e-17	1.72632e-15	64116	ENSG00000138821	SLC39A8	solute carrier family 39 member 8	-0.548085	1.8949e-09
115004	660.32	645.279	655.847	464.339	465.928	477.18	561.482	-0.457294	0.084335	-5.42234	5.88225e-08	6.76561e-07	115004	ENSG00000164430	CGAS	cyclic GMP-AMP synthase	-0.179797	0.157577
118980	884.764	795.062	838.027	615.519	586.909	606.349	721.105	-0.456649	0.0795907	-5.73747	9.6101e-09	1.2606e-07	118980	ENSG00000156398	SFXN2	sideroflexin 2	0.531547	2.85548e-08
55706	1297.87	1285.7	1345.99	954.202	885.862	995.993	1127.6	-0.456557	0.0692366	-6.59416	4.27678e-11	7.44854e-10	55706	ENSG00000058804	NDC1	NDC1 transmembrane nucleoporin	-0.178494	0.14066	YES
100113407	223.36	253.416	277.556	185.539	139.978	200.693	213.424	-0.455501	0.135826	-3.35357	0.000797774	0.00384869	100113407	ENSG00000205269	TMEM170B	transmembrane protein 170B	0.0430929	0.815416	YES
81788	1249.08	1357.76	1338.49	839.344	1051.84	952.225	1131.45	-0.455156	0.0789639	-5.7641	8.20938e-09	1.08635e-07	81788	ENSG00000163545	NUAK2	NUAK family kinase 2	-1.08048	2.19481e-11	YES	YES
6674	824.045	769.153	799.448	617.482	503.922	595.674	684.954	-0.455063	0.0870889	-5.22527	1.73905e-07	1.84724e-06	6674	ENSG00000104450	SPAG1	sperm associated antigen 1	0.0541166	0.711677
84230	956.326	892.218	847.672	676.384	584.909	677.873	772.563	-0.455059	0.0830792	-5.47741	4.31598e-08	5.08805e-07	84230	ENSG00000171488	LRRC8C	leucine rich repeat containing 8 VRAC subunit C	-1.77629	6.01448e-23	YES
1678	495.511	463.921	526.178	339.664	352.945	368.293	424.419	-0.455035	0.0971484	-4.68391	2.81448e-06	2.41902e-05	1678	ENSG00000126953	TIMM8A	translocase of inner mitochondrial membrane 8A	-0.0161388	0.944757
122769	738.387	709.24	775.872	491.826	570.911	533.758	636.666	-0.454898	0.0856797	-5.30928	1.10058e-07	1.20546e-06	122769	ENSG00000165501	LRR1	leucine rich repeat protein 1	0.142697	0.385555
894	2376.72	2483.15	2541.94	1864.23	1721.73	1779.55	2127.89	-0.454885	0.0574704	-7.91511	2.47032e-15	7.07618e-14	894	ENSG00000118971	CCND2	cyclin D2	-0.367001	0.230774	YES
115273	250.466	244.51	245.407	176.704	169.974	175.073	210.356	-0.453905	0.122923	-3.69259	0.000221981	0.0012492	115273	ENSG00000188060	RAB42	RAB42, member RAS oncogene family	-0.967268	1.59406e-09
8702	944.399	902.743	988.057	717.615	698.891	624.497	812.7	-0.453513	0.0793521	-5.7152	1.09575e-08	1.42471e-07	8702	ENSG00000121578	B4GALT4	beta-1,4-galactosyltransferase 4	-0.0938109	0.441196
441172	160.472	176.5	157.532	107.986	123.981	111.022	139.582	-0.45327	0.144376	-3.13951	0.00169229	0.00743688	441172	NA	FLJ46906	uncharacterized LOC441172	0.0913553	0.788955
207107	27.1067	12.1445	20.3613	2.94507	7.99876	11.7427	13.7165	-0.452516	0.193605	-2.33732	0.0194225	0.0585581	207107	ENSG00000225383	SFTA1P	surfactant associated 1, lncRNA	0.146174	0.706185
675	644.056	557.029	637.629	431.943	394.939	488.923	525.753	-0.452047	0.0975639	-4.63334	3.59812e-06	3.03572e-05	675	ENSG00000139618	BRCA2	BRCA2 DNA repair associated	0.108495	0.534023
2257	252.635	267.989	259.338	193.393	187.971	169.735	221.843	-0.451809	0.122041	-3.7021	0.00021382	0.00120862	2257	ENSG00000114279	FGF12	fibroblast growth factor 12	0.230491	0.33349
79187	620.202	616.942	616.196	404.456	478.926	449.424	531.024	-0.451571	0.090289	-5.0014	5.69169e-07	5.52067e-06	79187	ENSG00000105255	FSD1	fibronectin type III and SPRY domain containing 1	0.0828925	0.597024
146956	535.629	544.075	572.259	415.254	382.94	388.576	473.122	-0.451145	0.0916752	-4.92112	8.60504e-07	8.07174e-06	146956	ENSG00000154920	EME1	essential meiotic structure-specific endonuclease 1	0.404936	0.0018383
10926	446.719	425.868	410.44	295.488	299.953	323.458	366.988	-0.45055	0.101207	-4.45177	8.51662e-06	6.68389e-05	10926	ENSG00000006634	DBF4	DBF4 zinc finger	0.147558	0.158812
58478	2820.18	2511.49	2653.39	1875.03	1939.7	1987.72	2297.92	-0.449981	0.0590206	-7.62413	2.45692e-14	6.36489e-13	58478	ENSG00000145293	ENOPH1	enolase-phosphatase 1	-0.107497	0.333591	YES
4052	843.562	813.683	841.242	627.299	585.909	592.472	717.361	-0.449752	0.078021	-5.7645	8.19019e-09	1.08468e-07	4052	ENSG00000049323	LTBP1	latent transforming growth factor beta binding protein 1	-0.163254	0.509364	YES
126382	924.882	884.121	937.69	634.171	715.889	635.172	788.654	-0.449044	0.0787942	-5.69895	1.20551e-08	1.55418e-07	126382	ENSG00000184162	NR2C2AP	nuclear receptor 2C2 associated protein	0.414121	0.00231351
53346	405.517	404.008	392.222	301.379	269.958	289.297	343.73	-0.449002	0.103223	-4.34981	1.36257e-05	0.00010232	53346	ENSG00000136404	TM6SF1	transmembrane 6 superfamily member 1	-1.1587	5.06583e-06
439990	232.034	218.601	197.183	150.198	152.976	152.655	183.941	-0.448566	0.131131	-3.42075	0.000624484	0.00310234	439990	ENSG00000237523	LINC00857	long intergenic non-protein coding RNA 857	0.764129	4.82597e-07
101927873	207.095	168.404	165.033	123.693	124.981	127.034	152.707	-0.448501	0.142386	-3.14989	0.00163333	0.00721615	101927873	ENSG00000231107	LINC01508	long intergenic non-protein coding RNA 1508	-0.0543099	0.760965
9674	50.9607	55.0552	48.2241	27.4873	33.9947	34.1605	41.6471	-0.448438	0.195516	-2.29362	0.0218123	0.0646199	9674	ENSG00000235750	KIAA0040	KIAA0040	-0.842514	0.00985605
6573	975.843	1030.67	969.839	661.658	764.881	731.249	855.689	-0.44816	0.0775064	-5.78224	7.37145e-09	9.81751e-08	6573	ENSG00000173638	SLC19A1	solute carrier family 19 member 1	-0.457425	0.000251946
201973	569.241	561.887	546.539	420.163	390.939	398.184	481.159	-0.447938	0.0903165	-4.95965	7.06195e-07	6.74682e-06	201973	ENSG00000164306	PRIMPOL	primase and DNA directed polymerase	0.0266434	0.904602
81029	3580.26	3589.11	3595.37	2518.03	2722.58	2612.21	3102.93	-0.447918	0.0509748	-8.78705	1.53532e-18	5.91511e-17	81029	ENSG00000111186	WNT5B	Wnt family member 5B	-1.68684	1.68057e-24	YES	YES
1806	355.64	283.372	297.918	237.569	199.969	225.246	266.619	-0.447694	0.121346	-3.68939	0.000224793	0.00126331	1806	ENSG00000188641	DPYD	dihydropyrimidine dehydrogenase	0.0541532	0.74048
91614	460.815	383.767	417.942	303.342	301.953	296.77	360.765	-0.447591	0.10473	-4.27377	1.92191e-05	0.000140555	91614	ENSG00000121690	DEPDC7	DEP domain containing 7	0.386759	0.023052
541471	1381.36	1283.27	1394.21	981.689	998.845	966.102	1167.58	-0.447569	0.0671949	-6.66075	2.72431e-11	4.87838e-10	541471	ENSG00000172965	MIR4435-2HG	MIR4435-2 host gene	-0.339428	0.0994349
103910	12193.7	10727.7	11138.7	8567.2	7806.79	8457.93	9815.33	-0.447457	0.0542545	-8.24736	1.61931e-16	5.07856e-15	103910	ENSG00000118680	MYL12B	myosin light chain 12B	0.362177	0.00151095
55299	1859.52	1770.67	1832.51	1319.39	1330.79	1326.92	1573.3	-0.447327	0.0592604	-7.54849	4.40343e-14	1.10608e-12	55299	ENSG00000113460	BRIX1	biogenesis of ribosomes BRX1	0.41667	5.32232e-06	YES
50863	2774.65	2845.06	2719.84	2036.02	2027.68	2024.01	2404.54	-0.447016	0.0523969	-8.53134	1.44658e-17	5.06549e-16	50863	ENSG00000182667	NTM	neurotrimin	-1.80721	1.14652e-47
85360	3133.54	3298.45	3229.94	2240.21	2507.61	2299.43	2784.86	-0.44679	0.0564784	-7.91082	2.55703e-15	7.29923e-14	85360	ENSG00000105137	SYDE1	synapse defective Rho GTPase homolog 1	-0.0574987	0.591477	YES
5074	4922.58	4759.03	4758.11	3508.56	3300.49	3729.9	4163.11	-0.446662	0.0530297	-8.42286	3.67415e-17	1.23628e-15	5074	ENSG00000177425	PAWR	pro-apoptotic WT1 regulator	-0.246042	0.0392977	YES
10218	15.1798	15.3831	9.64481	6.87182	1.99969	2.13503	8.5357	-0.446607	0.179255	-2.49146	0.0127218	0.0413665	10218	ENSG00000171819	ANGPTL7	angiopoietin like 7	-0.435771	0.130072	YES	YES
253827	2482.98	2315.56	2479.79	1723.85	1749.73	1830.79	2097.11	-0.446497	0.057575	-7.75504	8.83139e-15	2.40074e-13	253827	ENSG00000174099	MSRB3	methionine sulfoxide reductase B3	-0.0940682	0.491069	YES	YES
347735	7020.64	7544.99	7319.34	5091.04	5701.11	5187.06	6310.7	-0.446413	0.0525143	-8.50079	1.88311e-17	6.48418e-16	347735	ENSG00000168528	SERINC2	serine incorporator 2	-0.776884	5.89943e-14
4306	107.343	109.301	115.738	79.5168	75.9882	70.4561	93.057	-0.445707	0.162735	-2.73886	0.00616535	0.0226245	4306	ENSG00000151623	NR3C2	nuclear receptor subfamily 3 group C member 2	-0.278064	0.453008	YES	YES
147372	2055.77	2129.34	2187.23	1624.7	1442.78	1577.79	1836.27	-0.445474	0.0619889	-7.18634	6.65488e-13	1.44726e-11	147372	ENSG00000183287	CCBE1	collagen and calcium binding EGF domains 1	0.000508876	0.997416	YES
23066	212.517	259.893	234.69	146.272	179.972	174.005	201.225	-0.444755	0.131822	-3.37392	0.000741069	0.00360884	23066	ENSG00000144712	CAND2	cullin associated and neddylation dissociated 2 (putative)	-0.488407	0.0974475
1633	1727.24	1664.61	1750	1286.01	1203.81	1259.67	1481.89	-0.444198	0.061754	-7.19302	6.3374e-13	1.38368e-11	1633	ENSG00000156136	DCK	deoxycytidine kinase	0.157064	0.10978
55679	568.157	535.169	591.548	384.822	424.934	413.129	486.293	-0.444157	0.0921822	-4.81825	1.4482e-06	1.30583e-05	55679	ENSG00000072163	LIMS2	LIM zinc finger domain containing 2	0.50552	0.010138	YES	YES
9495	328.534	293.088	288.273	230.697	187.971	228.449	259.502	-0.444105	0.120024	-3.70014	0.000215477	0.00121632	9495	ENSG00000179841	AKAP5	A-kinase anchoring protein 5	-0.143997	0.294356
130399	57.4663	37.2432	46.0808	24.5422	30.9952	28.8229	37.5251	-0.443954	0.199673	-2.2234	0.0261889	0.0751347	130399	ENSG00000123612	ACVR1C	activin A receptor type 1C	-0.0699983	NA
5362	934.64	942.415	1008.42	642.025	737.885	715.236	830.103	-0.443951	0.078546	-5.65211	1.58488e-08	1.99961e-07	5362	ENSG00000076356	PLXNA2	plexin A2	-1.38299	7.43943e-08	YES
5921	5509.17	5189.76	5286.43	3900.25	3871.4	3932.73	4614.96	-0.443438	0.0465299	-9.53018	1.57015e-21	7.63279e-20	5921	ENSG00000145715	RASA1	RAS p21 protein activator 1	-0.247532	0.00577974
7058	2687.9	3024.8	2847.36	2166.59	1962.69	2126.49	2469.31	-0.443251	0.0608775	-7.28103	3.31289e-13	7.48025e-12	7058	ENSG00000186340	THBS2	thrombospondin 2	-1.90135	6.47812e-11
401505	2705.25	2641.84	2732.7	1841.65	2123.67	1935.41	2330.09	-0.443073	0.060177	-7.36283	1.80051e-13	4.22111e-12	401505	ENSG00000175768	TOMM5	translocase of outer mitochondrial membrane 5	0.167506	0.371735	YES
5638	1051.74	913.268	982.699	707.798	661.897	768.612	847.669	-0.442814	0.0813563	-5.4429	5.24205e-08	6.09068e-07	5638	ENSG00000130962	PRRG1	proline rich and Gla domain 1	-0.288626	0.0282838
57552	7814.33	7680.2	7864.81	5812.58	5268.18	6018.66	6743.13	-0.442747	0.05182	-8.54395	1.29706e-17	4.56122e-16	57552	ENSG00000144959	NCEH1	neutral cholesterol ester hydrolase 1	-0.416696	4.46214e-06	YES
23542	619.118	681.713	680.495	469.247	522.919	441.952	569.241	-0.442705	0.0904166	-4.89628	9.76695e-07	9.0843e-06	23542	ENSG00000008735	MAPK8IP2	mitogen-activated protein kinase 8 interacting protein 2	-0.212756	0.29846
390963	99.7528	105.253	125.383	71.6633	81.9872	70.4561	92.4158	-0.442544	0.165576	-2.67275	0.00752315	0.0266715	390963	NA	ZNF818P	zinc finger protein 818, pseudogene	1.32175	1.54063e-05
7398	4535.5	4247.35	4300.51	3256.26	3040.53	3281.55	3776.95	-0.442225	0.0519227	-8.517	1.63745e-17	5.70965e-16	7398	ENSG00000162607	USP1	ubiquitin specific peptidase 1	-0.243085	0.000791423	YES
7378	1073.43	982.087	1041.64	669.512	824.872	753.667	890.867	-0.442063	0.0818073	-5.40371	6.52752e-08	7.45075e-07	7378	ENSG00000183696	UPP1	uridine phosphorylase 1	0.318651	0.0237707
1017	4106.13	4023.89	4112.98	3023.6	3044.53	2903.65	3535.79	-0.441706	0.0482859	-9.14772	5.81467e-20	2.45793e-18	1017	ENSG00000123374	CDK2	cyclin dependent kinase 2	-0.0484333	0.641624
2535	1281.61	1389.33	1281.69	876.648	1063.83	939.415	1138.75	-0.441373	0.0766567	-5.75778	8.5227e-09	1.126e-07	2535	ENSG00000180340	FZD2	frizzled class receptor 2	-0.0205132	0.880807	YES
79746	258.056	242.081	280.771	170.814	191.97	192.153	222.641	-0.440797	0.123774	-3.56132	0.000369001	0.00194727	79746	ENSG00000134463	ECHDC3	enoyl-CoA hydratase domain containing 3	0.325585	0.0209852
154	389.253	360.288	363.288	284.69	276.957	235.921	318.399	-0.440714	0.109688	-4.0179	5.87191e-05	0.000380592	154	ENSG00000169252	ADRB2	adrenoceptor beta 2	0.278796	0.128009	YES	YES
100996702	29.2753	32.3854	26.7911	20.6155	11.9981	14.9452	22.6684	-0.440251	0.204666	-2.15106	0.0314711	0.0872156	100996702	ENSG00000215866	LINC01356	long intergenic non-protein coding RNA 1356	NA	NA
26227	4280.7	4129.14	4522.34	2884.2	3371.48	3207.89	3732.62	-0.440212	0.0602851	-7.30217	2.83159e-13	6.44635e-12	26227	ENSG00000092621	PHGDH	phosphoglycerate dehydrogenase	-0.116659	0.190165
23109	23.8539	27.5276	27.8628	9.81689	12.998	18.1478	20.0345	-0.440018	0.204148	-2.15538	0.0311318	0.0864293	23109	ENSG00000181418	DDN	dendrin	0.0689146	0.879215	YES	YES
100422885	166.977	105.253	101.806	105.041	63.99	78.9962	103.677	-0.439992	0.177169	-2.48346	0.0130111	0.042158	100422885	ENSG00000283498	MIR1244-2	microRNA 1244-2	-0.247263	0.515674
285550	1030.06	950.511	894.824	711.725	722.888	657.59	827.932	-0.439957	0.0792914	-5.54861	2.87952e-08	3.47646e-07	285550	ENSG00000237765	FAM200B	family with sequence similarity 200 member B	0.20108	0.0859682
10124	294.921	280.134	288.273	181.612	210.967	224.178	246.681	-0.439679	0.119695	-3.67333	0.000239408	0.00133243	10124	ENSG00000122644	ARL4A	ADP ribosylation factor like GTPase 4A	0.410713	0.000317064	YES	YES
29126	8137.44	7839.7	8066.28	6102.18	5453.15	6088.05	6947.8	-0.439358	0.0510022	-8.61449	7.02562e-18	2.52983e-16	29126	ENSG00000120217	CD274	CD274 molecule	-0.466024	8.05833e-08
100506499	106.258	134.399	101.806	88.352	79.9876	65.1185	95.987	-0.438518	0.167518	-2.61774	0.00885147	0.0306445	100506499	NA	NA	NA	-0.479248	0.169966
2304	2497.07	2532.54	2606.24	1745.44	2037.68	1809.44	2204.74	-0.438327	0.0627403	-6.98637	2.8208e-12	5.70652e-11	2304	ENSG00000178919	FOXE1	forkhead box E1	-0.92394	1.40495e-09
23310	2038.43	1989.27	2080.06	1511.8	1509.77	1457.16	1764.42	-0.437691	0.0576033	-7.59837	2.99883e-14	7.70834e-13	23310	ENSG00000151503	NCAPD3	non-SMC condensin II complex subunit D3	0.444399	3.76124e-05
284119	57852.3	57041.2	58713.3	40807.8	45110	41810.4	50222.5	-0.437471	0.0443152	-9.87181	5.51605e-23	3.00889e-21	284119	ENSG00000177469	CAVIN1	caveolae associated protein 1	0.0266486	0.790684	YES	YES
340061	1128.72	1142.39	1093.08	824.619	809.874	828.393	971.181	-0.437303	0.0692703	-6.313	2.73683e-10	4.38743e-09	340061	ENSG00000184584	STING1	stimulator of interferon response cGAMP interactor 1	-0.072915	0.559481
114789	1283.78	1156.16	1215.25	866.831	972.849	826.258	1053.52	-0.437198	0.0761985	-5.73762	9.60153e-09	1.26048e-07	114789	ENSG00000148339	SLC25A25	solute carrier family 25 member 25	-0.290899	0.00473957	YES	YES
255403	761.157	708.431	694.426	536.984	500.922	538.028	623.325	-0.436982	0.0837503	-5.21768	1.81181e-07	1.91713e-06	255403	ENSG00000250312	ZNF718	zinc finger protein 718	-0.66198	6.7147e-07
55071	1062.58	1054.14	1020.21	657.732	886.862	736.586	903.019	-0.436899	0.0889727	-4.91048	9.08535e-07	8.50299e-06	55071	ENSG00000135045	C9orf40	chromosome 9 open reading frame 40	-0.0740595	0.642535
2175	1427.98	1427.39	1527.1	1093.6	1067.83	1048.3	1265.37	-0.43682	0.0649814	-6.72224	1.78953e-11	3.28272e-10	2175	ENSG00000187741	FANCA	FA complementation group A	-0.159724	0.234236
8727	3597.61	3110.62	3240.66	2463.06	2438.62	2394.44	2874.17	-0.436768	0.0592594	-7.37045	1.70051e-13	3.99801e-12	8727	ENSG00000119326	CTNNAL1	catenin alpha like 1	0.328736	2.41831e-05	YES	YES
349152	346.966	336.808	327.924	283.708	224.965	215.638	289.335	-0.436716	0.117661	-3.71165	0.000205911	0.00116791	349152	ENSG00000170629	DPY19L2P2	DPY19L2 pseudogene 2	0.341343	0.0562335
23560	4441.17	4181.76	4328.38	3148.28	3066.52	3309.3	3745.9	-0.436179	0.0509686	-8.5578	1.15039e-17	4.07144e-16	23560	ENSG00000107937	GTPBP4	GTP binding protein 4	0.132913	0.20112	YES
254552	264.562	228.317	257.195	164.924	202.968	164.398	213.727	-0.436151	0.128828	-3.38552	0.000710437	0.0034843	254552	ENSG00000167799	NUDT8	nudix hydrolase 8	0.0861608	0.778502
101927630	24.9382	20.2409	24.6479	10.7986	10.9983	12.8102	17.4057	-0.43562	0.203113	-2.14472	0.0319753	0.088242	101927630	ENSG00000236039	LINC02889	long intergenic non-protein coding RNA 2889	-0.0113481	NA
8660	4082.27	4079.75	3997.24	2815.48	3126.51	3003.99	3517.54	-0.435611	0.052283	-8.33178	7.96349e-17	2.5657e-15	8660	ENSG00000185950	IRS2	insulin receptor substrate 2	-0.191241	0.104325	YES
54892	2156.61	2020.85	2071.49	1559.9	1513.76	1514.81	1806.24	-0.435578	0.0579546	-7.51584	5.65464e-14	1.40541e-12	54892	ENSG00000146918	NCAPG2	non-SMC condensin II complex subunit G2	0.209804	0.0288286
79940	210.348	224.269	242.192	162.96	135.979	181.478	192.871	-0.435311	0.133902	-3.25096	0.00115015	0.00531442	79940	ENSG00000233237	LINC00472	long intergenic non-protein coding RNA 472	0.0467978	0.814729
196792	124.691	141.686	140.386	92.2788	83.9869	106.752	114.963	-0.435257	0.155098	-2.80634	0.00501083	0.0190871	196792	ENSG00000213185	FAM24B	family with sequence similarity 24 member B	0.162307	0.599612
100288162	46.6236	59.913	17.1463	27.4873	15.9975	23.4854	31.7755	-0.434685	0.204617	-2.12439	0.0336376	0.0920383	100288162	NA	LOC100288162	uncharacterized LOC100288162	NA	NA
54865	1180.77	1105.96	1180.95	760.809	922.856	850.811	1000.36	-0.434515	0.0778078	-5.58446	2.34421e-08	2.89143e-07	54865	ENSG00000160818	GPATCH4	G-patch domain containing 4	-0.215997	0.0433934
389421	17.3483	21.8601	12.8597	7.85351	4.99922	8.54013	12.2435	-0.434052	0.194626	-2.23019	0.0257351	0.0741416	389421	ENSG00000187772	LIN28B	lin-28 homolog B	-0.933252	0.00354211
8165	2095.89	2137.44	2206.52	1525.54	1672.74	1536.16	1862.38	-0.433897	0.0599686	-7.2354	4.6415e-13	1.02973e-11	8165	ENSG00000121057	AKAP1	A-kinase anchoring protein 1	-0.187511	0.095801	YES
55359	261.309	231.556	233.619	177.686	165.974	175.073	207.536	-0.433277	0.125387	-3.45551	0.000549261	0.00277705	55359	ENSG00000060140	STYK1	serine/threonine/tyrosine kinase 1	-0.545339	0.0077051
54517	676.584	660.662	640.844	547.782	433.933	456.897	569.45	-0.433182	0.0937738	-4.61944	3.84779e-06	3.2266e-05	54517	ENSG00000091127	PUS7	pseudouridine synthase 7	-0.136657	0.238143	YES
11144	118.185	113.349	91.0899	65.7732	73.9885	81.1313	90.5862	-0.432894	0.167488	-2.58462	0.0097486	0.0332011	11144	ENSG00000100206	DMC1	DNA meiotic recombinase 1	-0.233678	0.262036
54680	1508.22	1443.58	1439.22	1100.47	1077.83	1049.37	1269.78	-0.432219	0.0639736	-6.75621	1.41653e-11	2.62765e-10	54680	ENSG00000117174	ZNHIT6	zinc finger HIT-type containing 6	-0.158203	0.0512289	YES
23657	475.994	536.788	515.462	375.987	328.949	406.724	439.984	-0.43208	0.10058	-4.29588	1.74005e-05	0.000128277	23657	ENSG00000151012	SLC7A11	solute carrier family 7 member 11	-0.936307	6.046e-11
375033	911.871	922.984	974.126	676.384	642.9	738.721	811.164	-0.432072	0.0783027	-5.51797	3.42938e-08	4.08952e-07	375033	ENSG00000187800	PEAR1	platelet endothelial aggregation receptor 1	-1.25039	2.52771e-15
387103	852.236	812.064	847.672	561.526	674.895	599.944	724.723	-0.431448	0.0835114	-5.16633	2.38731e-07	2.46763e-06	387103	ENSG00000203760	CENPW	centromere protein W	0.259115	0.229181
7286	3662.66	3145.43	3553.58	2542.57	2586.6	2495.85	2997.78	-0.431325	0.0602139	-7.16322	7.88025e-13	1.6959e-11	7286	ENSG00000143367	TUFT1	tuftelin 1	-0.12773	0.112714	YES	YES
51491	696.101	576.46	645.131	442.742	478.926	473.977	552.223	-0.430981	0.0925046	-4.65902	3.17713e-06	2.70539e-05	51491	ENSG00000048162	NOP16	NOP16 nucleolar protein	-0.0819979	0.664811	YES
7913	11647.2	10428.1	10878.3	8277.6	7780.79	8288.2	9550.03	-0.429782	0.0500796	-8.58199	9.32482e-18	3.32156e-16	7913	ENSG00000124795	DEK	DEK proto-oncogene	0.239401	0.000500483	YES
23417	906.449	899.504	908.756	630.244	696.892	666.13	784.663	-0.429636	0.0761416	-5.6426	1.67505e-08	2.10355e-07	23417	ENSG00000103150	MLYCD	malonyl-CoA decarboxylase	0.153392	0.377953	YES	YES
5427	358.893	363.526	380.434	261.129	269.958	269.014	317.159	-0.429632	0.105489	-4.07275	4.64606e-05	0.000309789	5427	ENSG00000100479	POLE2	DNA polymerase epsilon 2, accessory subunit	0.369144	0.00815448
147700	1051.74	995.851	1021.28	730.377	823.872	696.021	886.523	-0.429414	0.0780466	-5.50202	3.75471e-08	4.45818e-07	147700	ENSG00000104892	KLC3	kinesin light chain 3	-0.192898	0.179464
26230	551.893	480.114	563.686	376.969	414.935	367.226	459.137	-0.429413	0.0982139	-4.37222	1.22988e-05	9.32879e-05	26230	ENSG00000146426	TIAM2	TIAM Rac1 associated GEF 2	0.261404	0.00970805
5558	1503.88	1433.86	1441.36	1122.07	1007.84	1094.2	1267.2	-0.429195	0.0667696	-6.428	1.29291e-10	2.14766e-09	5558	ENSG00000146143	PRIM2	DNA primase subunit 2	0.287697	0.00299831
84947	449.972	398.34	414.727	309.232	269.958	336.268	363.083	-0.429113	0.107152	-4.00473	6.20891e-05	0.000400394	84947	ENSG00000122335	SERAC1	serine active site containing 1	0.791899	8.18434e-12	YES
51202	2799.58	2477.48	2445.5	1936.87	1788.72	1964.23	2235.4	-0.429021	0.0643374	-6.66829	2.58792e-11	4.64421e-10	51202	ENSG00000213782	DDX47	DEAD-box helicase 47	0.325294	0.000708632	YES
130733	229.865	218.601	191.825	171.796	141.978	141.98	182.674	-0.428985	0.135181	-3.17341	0.00150661	0.00673372	130733	ENSG00000152154	TMEM178A	transmembrane protein 178A	-0.548435	0.114259
93323	665.741	620.18	661.205	460.412	522.919	437.682	561.357	-0.428954	0.0905533	-4.73704	2.16865e-06	1.90657e-05	93323	ENSG00000131351	HAUS8	HAUS augmin like complex subunit 8	0.287264	0.0122332	YES
389362	615.865	535.169	603.337	404.456	490.924	377.901	504.608	-0.428696	0.101983	-4.20361	2.62689e-05	0.000185544	389362	ENSG00000180822	PSMG4	proteasome assembly chaperone 4	0.139427	0.472261
159371	397.927	375.671	366.503	295.488	254.96	276.487	327.839	-0.428613	0.106779	-4.01401	5.96962e-05	0.000386319	159371	ENSG00000176273	SLC35G1	solute carrier family 35 member G1	0.26899	0.059937
347240	403.348	402.389	427.587	312.177	307.952	275.419	354.812	-0.42858	0.103098	-4.15702	3.22423e-05	0.000223908	347240	ENSG00000186638	KIF24	kinesin family member 24	0.202736	0.27333	YES
51361	393.59	422.629	379.363	287.635	264.959	317.052	344.205	-0.428448	0.106816	-4.01111	6.0435e-05	0.000390336	51361	ENSG00000134709	HOOK1	hook microtubule tethering protein 1	-0.813751	9.63608e-13	YES
79084	1789.04	1587.69	1701.77	1228.09	1211.81	1300.24	1469.78	-0.428353	0.0660563	-6.48466	8.89306e-11	1.50599e-09	79084	ENSG00000116455	WDR77	WD repeat domain 77	-0.232068	0.0397471	YES
84133	600.685	610.465	649.417	440.778	453.929	467.572	537.141	-0.428156	0.087253	-4.90706	9.24537e-07	8.63807e-06	84133	ENSG00000183579	ZNRF3	zinc and ring finger 3	-0.258913	0.0700979	YES
11001	59.6348	53.4359	78.2301	34.3591	45.9928	42.7007	52.3922	-0.428026	0.191049	-2.2404	0.025065	0.0726669	11001	ENSG00000140284	SLC27A2	solute carrier family 27 member 2	0.230972	0.554531
51060	3341.72	3102.52	3280.31	2398.27	2353.63	2437.14	2818.93	-0.427712	0.0527769	-8.10416	5.31109e-16	1.60772e-14	51060	ENSG00000117862	TXNDC12	thioredoxin domain containing 12	-0.0203915	0.885752	YES
3038	1682.79	1601.46	1544.24	1199.62	1202.81	1161.46	1398.73	-0.426952	0.0633728	-6.73715	1.61523e-11	2.97289e-10	3038	ENSG00000103044	HAS3	hyaluronan synthase 3	0.555189	0.000147135
116461	1271.85	1157.78	1160.59	895.3	848.868	899.916	1039.05	-0.426693	0.0711419	-5.99778	2.00033e-09	2.86495e-08	116461	ENSG00000198860	TSEN15	tRNA splicing endonuclease subunit 15	0.229333	0.0387859	YES
105373472	26.0225	33.195	25.7195	14.7253	17.9972	13.8777	21.9229	-0.425796	0.204652	-2.08058	0.0374721	0.100265	105373472	NA	NA	NA	0.0825846	0.799715
84844	1242.57	1125.39	1260.26	894.319	880.863	896.714	1050.02	-0.425701	0.07119	-5.97979	2.23432e-09	3.17258e-08	84844	ENSG00000100410	PHF5A	PHD finger protein 5A	0.25643	0.00788642	YES
4501	462.983	412.914	444.733	319.049	336.948	305.31	380.323	-0.425622	0.100933	-4.21689	2.47699e-05	0.000175933	4501	ENSG00000187193	MT1X	metallothionein 1X	-0.633738	0.0318802
3856	24443.8	22506.2	24256.7	16798.7	18690.1	17287.4	20663.8	-0.425482	0.0497823	-8.54686	1.26487e-17	4.45751e-16	3856	ENSG00000170421	KRT8	keratin 8	0.238412	0.00262054
117177	670.079	671.997	652.632	493.79	483.925	488.923	576.891	-0.424737	0.0834297	-5.09095	3.56276e-07	3.60154e-06	117177	ENSG00000127328	RAB3IP	RAB3A interacting protein	0.237557	0.093696	YES
1503	4116.97	3725.94	3894.36	2862.61	2790.57	3039.22	3404.94	-0.42473	0.0553429	-7.67452	1.66039e-14	4.38386e-13	1503	ENSG00000171793	CTPS1	CTP synthase 1	-0.562709	3.36316e-16	YES
27101	3458.82	3117.9	3378.9	2446.37	2509.61	2413.65	2887.54	-0.424708	0.0552666	-7.68471	1.53347e-14	4.06172e-13	27101	ENSG00000116161	CACYBP	calcyclin binding protein	0.262002	0.0150586	YES
55646	649.477	571.602	638.701	413.291	502.922	443.019	536.502	-0.424178	0.0951312	-4.45888	8.23908e-06	6.49383e-05	55646	ENSG00000145220	LYAR	Ly1 antibody reactive	-0.392535	0.00126243	YES
151230	67.2247	70.4382	53.5823	49.0845	43.9932	30.958	52.5468	-0.424026	0.19104	-2.21957	0.0264477	0.0757981	151230	ENSG00000213160	KLHL23	kelch like family member 23	0.0266864	0.955372
3619	1468.1	1531.02	1492.8	1103.42	1153.82	1066.45	1302.6	-0.423898	0.0642647	-6.59612	4.22053e-11	7.35832e-10	3619	ENSG00000149503	INCENP	inner centromere protein	-0.114343	0.408011	YES
161176	78.0674	67.1997	64.2987	49.0845	46.9927	42.7007	58.0573	-0.423853	0.184299	-2.2998	0.0214594	0.0638144	161176	ENSG00000176438	SYNE3	spectrin repeat containing nuclear envelope family member 3	-0.880662	0.00532838	YES	YES
166378	458.646	470.398	416.87	321.012	329.949	334.133	388.501	-0.423782	0.0994952	-4.25932	2.05049e-05	0.000149034	166378	ENSG00000145375	SPATA5	spermatogenesis associated 5	-0.587917	8.53695e-05	YES
11340	1098.36	990.184	1130.59	838.362	759.882	770.747	931.354	-0.42369	0.077182	-5.4895	4.03078e-08	4.76544e-07	11340	ENSG00000120699	EXOSC8	exosome component 8	0.400087	0.00487673	YES
51001	496.595	454.205	461.879	367.152	320.95	343.74	407.42	-0.423538	0.0988251	-4.28573	1.82139e-05	0.000133795	51001	ENSG00000156469	MTERF3	mitochondrial transcription termination factor 3	0.117831	0.486745	YES
5471	1468.1	1353.71	1406	1058.26	997.845	1068.58	1225.42	-0.423318	0.0667682	-6.34011	2.29608e-10	3.70602e-09	5471	ENSG00000128059	PPAT	phosphoribosyl pyrophosphate amidotransferase	-0.223396	0.0216989
55714	1053.91	1090.58	982.699	764.736	731.886	813.448	906.209	-0.42328	0.0755847	-5.60008	2.14257e-08	2.6546e-07	55714	ENSG00000218336	TENM3	teneurin transmembrane protein 3	-0.23771	0.108693	YES
1295	2356.12	2315.56	2322.26	1721.88	1619.75	1841.47	2029.5	-0.423139	0.0598231	-7.07317	1.51435e-12	3.14832e-11	1295	ENSG00000144810	COL8A1	collagen type VIII alpha 1 chain	-0.117762	0.489611	YES
51099	921.629	770.773	802.663	627.299	584.909	620.227	721.25	-0.423058	0.0851961	-4.9657	6.84534e-07	6.56263e-06	51099	ENSG00000011198	ABHD5	abhydrolase domain containing 5, lysophosphatidic acid acyltransferase	-0.155384	0.17197	YES
84319	565.989	516.547	501.53	379.914	371.942	408.859	457.463	-0.422847	0.0948674	-4.45725	8.30196e-06	6.53715e-05	84319	ENSG00000184220	CMSS1	cms1 ribosomal small subunit homolog	0.505334	1.48394e-05
55142	2239.02	2013.56	2070.42	1547.14	1513.76	1621.56	1834.24	-0.422495	0.0617961	-6.83692	8.09123e-12	1.55502e-10	55142	ENSG00000137814	HAUS2	HAUS augmin like complex subunit 2	0.0099472	0.937704	YES
672	1868.2	1811.96	1873.24	1417.56	1292.8	1404.85	1611.43	-0.421982	0.061545	-6.85647	7.05821e-12	1.36923e-10	672	ENSG00000012048	BRCA1	BRCA1 DNA repair associated	0.491332	3.11123e-07
3312	57821.9	52939.6	56103.9	40259.1	42462.4	41457	48507.3	-0.421263	0.0437735	-9.62371	6.34958e-22	3.2291e-20	3312	ENSG00000109971	HSPA8	heat shock protein family A (Hsp70) member 8	0.200675	0.116446	YES
57650	921.629	812.064	797.304	669.512	579.91	612.755	732.196	-0.421178	0.085315	-4.93674	7.94401e-07	7.50706e-06	57650	ENSG00000163507	CIP2A	cellular inhibitor of PP2A	0.152374	0.114537
598	16315	16156.3	16853.8	11728.2	12705	12278.6	14339.5	-0.421071	0.0438166	-9.60985	7.26535e-22	3.6499e-20	598	ENSG00000171552	BCL2L1	BCL2 like 1	-0.167198	0.0253839	YES
115752	816.455	734.339	764.083	587.05	561.913	556.176	670.003	-0.420767	0.0816884	-5.15088	2.59267e-07	2.66324e-06	115752	ENSG00000166938	DIS3L	DIS3 like exosome 3'-5' exoribonuclease	0.0317223	0.861337	YES
92610	808.865	798.3	794.089	592.94	605.906	574.324	695.737	-0.420511	0.0780524	-5.38755	7.14236e-08	8.06345e-07	92610	ENSG00000145365	TIFA	TRAF interacting protein with forkhead associated domain	-0.499515	6.72928e-07	YES	YES
27292	929.219	864.69	896.967	664.603	658.898	663.995	779.729	-0.420457	0.075537	-5.56624	2.60296e-08	3.17503e-07	27292	ENSG00000086189	DIMT1	DIMT1 rRNA methyltransferase and ribosome maturation factor	0.080589	0.63679	YES
245972	285.163	280.134	233.619	188.484	165.974	222.043	229.236	-0.42022	0.129765	-3.23832	0.00120234	0.00552161	245972	ENSG00000147614	ATP6V0D2	ATPase H+ transporting V0 subunit d2	0.0695166	0.824854
57157	1341.24	1309.18	1263.47	977.762	927.856	995.993	1135.92	-0.420055	0.0672838	-6.24303	4.29185e-10	6.6357e-09	57157	ENSG00000006576	PHTF2	putative homeodomain transcription factor 2	0.215558	0.0421247	YES
90956	1499.54	1613.6	1467.08	1012.12	1220.81	1159.32	1328.75	-0.419935	0.0741543	-5.66299	1.4876e-08	1.88696e-07	90956	ENSG00000133597	ADCK2	aarF domain containing kinase 2	-0.0700919	0.63161	YES
10112	287.331	279.324	272.198	183.576	213.967	211.368	241.294	-0.419618	0.119137	-3.52214	0.00042808	0.00221797	10112	ENSG00000112984	KIF20A	kinesin family member 20A	0.351126	0.000260974
27309	1018.13	915.697	919.472	729.395	717.888	658.658	826.54	-0.419613	0.0785218	-5.34391	9.09629e-08	1.00766e-06	27309	ENSG00000109445	ZNF330	zinc finger protein 330	-0.44644	7.32419e-05
54935	1317.39	1407.15	1360.99	928.678	1127.82	967.17	1184.87	-0.419413	0.0757406	-5.53748	3.06849e-08	3.68576e-07	54935	ENSG00000158716	DUSP23	dual specificity phosphatase 23	0.262984	0.116771
221935	173.483	173.262	136.099	120.748	107.983	114.224	137.633	-0.41933	0.148042	-2.83251	0.00461844	0.017752	221935	ENSG00000146555	SDK1	sidekick cell adhesion molecule 1	-1.83071	8.82071e-10
7164	741.64	631.515	667.635	496.735	503.922	500.665	590.352	-0.419145	0.0878042	-4.77364	1.80929e-06	1.61382e-05	7164	ENSG00000111907	TPD52L1	TPD52 like 1	0.00221941	0.990789
8412	3622.54	3525.15	3636.09	2622.09	2737.57	2668.79	3135.37	-0.418976	0.049504	-8.46348	2.59514e-17	8.82563e-16	8412	ENSG00000137936	BCAR3	BCAR3 adaptor protein, NSP family member	-0.0537465	0.656101	YES	YES
55210	3492.43	3508.96	3266.38	2468.95	2683.58	2487.31	2984.6	-0.41891	0.0552491	-7.58221	3.3973e-14	8.63854e-13	55210	ENSG00000197785	ATAD3A	ATPase family AAA domain containing 3A	-0.275201	0.00523438
2262	95.4157	80.1539	77.1585	53.9929	62.9902	54.4433	70.6924	-0.418405	0.176901	-2.3652	0.0180203	0.0549926	2262	ENSG00000179399	GPC5	glypican 5	-0.429483	0.0882013
4884	281.91	310.09	293.631	230.697	220.966	192.153	254.908	-0.41838	0.118117	-3.54207	0.000397001	0.00207581	4884	ENSG00000171246	NPTX1	neuronal pentraxin 1	-0.672601	0.0357828
399815	177.82	122.255	161.819	114.858	93.9854	114.224	130.827	-0.418293	0.156394	-2.67461	0.00748158	0.0265647	399815	NA	C10orf88B	C10orf88B (pseudogene)	0.217808	0.309197
3696	2543.7	2977.84	2620.17	2176.4	1813.72	2049.63	2363.58	-0.418246	0.0719398	-5.81384	6.1056e-09	8.19768e-08	3696	ENSG00000105855	ITGB8	integrin subunit beta 8	-0.411213	0.00718135	YES	YES
55345	286.247	288.23	302.204	236.587	195.97	203.896	252.189	-0.418183	0.118427	-3.53115	0.000413764	0.00215256	55345	ENSG00000138658	ZGRF1	zinc finger GRF-type containing 1	0.230936	0.160599
3014	4287.2	4569.58	4422.68	3025.57	3661.43	3182.27	3858.12	-0.418012	0.0631772	-6.6165	3.67811e-11	6.4741e-10	3014	ENSG00000188486	H2AX	H2A.X variant histone	0.324569	1.92789e-05
29798	108.427	138.448	122.168	96.2055	74.9883	87.5364	104.629	-0.417495	0.161432	-2.5862	0.00970409	0.0330768	29798	ENSG00000287151	C2orf27A	chromosome 2 open reading frame 27A	-0.38771	0.0934183
2202	2642.36	2360.9	2524.8	1925.09	1760.73	1908.72	2187.1	-0.417385	0.0613518	-6.80314	1.02364e-11	1.93799e-10	2202	ENSG00000115380	EFEMP1	EGF containing fibulin extracellular matrix protein 1	-0.506117	5.70216e-05	YES	YES
10535	2713.93	2752.76	2760.56	1880.92	2235.65	2000.53	2390.72	-0.417338	0.0627692	-6.64877	2.95544e-11	5.26374e-10	10535	ENSG00000104889	RNASEH2A	ribonuclease H2 subunit A	0.272692	0.0198972	YES
83879	1298.95	1193.4	1251.68	982.671	849.868	941.55	1086.35	-0.417105	0.0732827	-5.69172	1.25763e-08	1.61634e-07	83879	ENSG00000144354	CDCA7	cell division cycle associated 7	-0.159417	0.134263
344805	22.7697	23.4794	30.0061	14.7253	13.9978	11.7427	19.4535	-0.417016	0.204139	-2.0428	0.041072	0.108095	344805	ENSG00000176040	TMPRSS7	transmembrane serine protease 7	0.243871	NA
8851	615.865	588.605	629.056	457.467	472.926	420.602	530.753	-0.416753	0.0888921	-4.68831	2.75477e-06	2.37263e-05	8851	ENSG00000176749	CDK5R1	cyclin dependent kinase 5 regulatory subunit 1	-0.200893	0.19885
26064	25121.4	24393.5	24248.1	18821.9	17360.3	18885.4	21471.8	-0.416691	0.0442985	-9.40643	5.13253e-21	2.36956e-19	26064	ENSG00000039560	RAI14	retinoic acid induced 14	-0.268055	0.0166797	YES
26774	93.2472	63.9612	95.3765	54.9746	67.9894	44.8357	70.0641	-0.416282	0.183838	-2.2644	0.0235494	0.0690604	26774	NA	SNORD80	small nucleolar RNA, C/D box 80	0.0378219	0.911985
3835	1257.75	1297.84	1302.05	926.714	1040.84	895.646	1120.14	-0.416258	0.0718112	-5.79656	6.76891e-09	9.04418e-08	3835	ENSG00000079616	KIF22	kinesin family member 22	0.318047	0.000304336
266977	1123.3	1057.38	1001.99	794.186	767.881	799.57	924.052	-0.416044	0.0734851	-5.66161	1.49961e-08	1.89927e-07	266977	ENSG00000153292	ADGRF1	adhesion G protein-coupled receptor F1	-1.60056	2.33491e-17
83448	548.64	556.219	556.184	425.071	388.94	412.061	481.186	-0.415684	0.090365	-4.60006	4.22379e-06	3.52936e-05	83448	ENSG00000129317	PUS7L	pseudouridine synthase 7 like	0.0388837	0.867758
101929407	65.0562	89.8695	84.66	46.1394	51.9919	64.051	66.9613	-0.415161	0.182162	-2.27907	0.022663	0.0667927	101929407	ENSG00000225706	PTPRD-AS1	PTPRD antisense RNA 1	-0.304357	0.424082
79827	1682.79	1631.41	1637.47	1257.54	1192.81	1238.32	1440.06	-0.41475	0.0612016	-6.77679	1.22876e-11	2.29739e-10	79827	ENSG00000166250	CLMP	CXADR like membrane protein	-0.0819131	0.663007
1356	33.6124	32.3854	37.5076	24.5422	20.9967	14.9452	27.3316	-0.414558	0.203934	-2.03281	0.0420719	0.110322	1356	ENSG00000047457	CP	ceruloplasmin	0.187693	0.589644	YES
1794	567.073	521.405	537.966	399.547	383.94	416.331	471.044	-0.414452	0.0920736	-4.50131	6.75361e-06	5.41862e-05	1794	ENSG00000134516	DOCK2	dedicator of cytokinesis 2	-0.274278	0.018946
84671	441.298	414.533	435.088	325.921	266.958	353.348	372.858	-0.414017	0.108376	-3.8202	0.000133346	0.000794784	84671	ENSG00000197937	ZNF347	zinc finger protein 347	0.545595	0.00375837
196483	326.365	305.232	346.142	240.514	249.961	223.111	281.887	-0.413686	0.112903	-3.6641	0.000248213	0.0013762	196483	ENSG00000118894	EEF2KMT	eukaryotic elongation factor 2 lysine methyltransferase	-0.242235	0.110262	YES
10129	127.944	106.062	92.1615	86.3886	71.9888	67.2535	91.9664	-0.41363	0.168787	-2.45061	0.0142616	0.0455314	10129	ENSG00000073910	FRY	FRY microtubule binding protein	0.0876757	0.824835	YES	YES
130026	134.449	133.59	118.953	96.2055	90.9859	86.4688	110.109	-0.413381	0.155122	-2.66487	0.00770174	0.0272404	130026	ENSG00000163596	ICA1L	islet cell autoantigen 1 like	0.116694	0.544169	YES
23234	2860.3	2737.38	2779.85	2071.36	2090.67	2097.67	2439.54	-0.413051	0.0521946	-7.91366	2.49927e-15	7.1467e-14	23234	ENSG00000213551	DNAJC9	DnaJ heat shock protein family (Hsp40) member C9	0.508688	5.6762e-09	YES
81831	3838.31	3535.68	3496.78	2699.64	2707.58	2714.69	3165.45	-0.412942	0.0530297	-7.787	6.86215e-15	1.89029e-13	81831	ENSG00000171208	NETO2	neuropilin and tolloid like 2	0.128081	0.247755
9780	12283.7	13567.9	13261.6	9506.68	10197.4	9554.27	11395.3	-0.412878	0.0491836	-8.39463	4.6737e-17	1.55114e-15	9780	ENSG00000103335	PIEZO1	piezo type mechanosensitive ion channel component 1	-0.839118	9.77867e-14	YES
79993	389.253	408.866	367.574	289.598	287.955	280.757	337.334	-0.412611	0.104049	-3.96555	7.32256e-05	0.000464774	79993	ENSG00000164181	ELOVL7	ELOVL fatty acid elongase 7	-0.23498	0.303152	YES
9966	300.343	284.992	250.765	218.917	170.973	217.773	240.627	-0.412557	0.126107	-3.27149	0.00106984	0.00499217	9966	ENSG00000181634	TNFSF15	TNF superfamily member 15	-0.745698	0.00599017	YES	YES
8502	2839.7	2787.57	2878.44	2138.12	2106.67	2113.68	2477.36	-0.412549	0.0515722	-7.99944	1.24982e-15	3.67563e-14	8502	ENSG00000144283	PKP4	plakophilin 4	-0.225142	0.0227694	YES
219844	277.573	284.182	259.338	198.301	199.969	201.761	236.854	-0.412458	0.11823	-3.48861	0.000485531	0.00248525	219844	ENSG00000198331	HYLS1	HYLS1 centriolar and ciliogenesis associated	0.34506	0.0188916
105369972	142.039	159.498	154.317	118.784	99.9845	106.752	130.229	-0.412215	0.147843	-2.7882	0.00530015	0.0200048	105369972	NA	NA	NA	0.250824	0.5098
284307	39.0337	48.5781	50.3673	33.3774	27.9956	25.6204	37.4954	-0.411763	0.198705	-2.07223	0.0382438	0.101836	284307	ENSG00000171649	ZIK1	zinc finger protein interacting with K protein 1	-0.0132148	0.975041
3281	8894.26	8110.92	8732.84	6401.59	6322.02	6541.74	7500.56	-0.411755	0.0474607	-8.67571	4.10971e-18	1.5333e-16	3281	ENSG00000230989	HSBP1	heat shock factor binding protein 1	0.276941	0.012688	YES
9414	6860.17	7013.06	7165.02	5201.97	5351.17	5210.55	6133.66	-0.411588	0.0437468	-9.40842	5.03649e-21	2.33829e-19	9414	ENSG00000119139	TJP2	tight junction protein 2	-0.41205	4.86911e-06	YES
51154	2598.99	2406.24	2518.37	1795.51	1938.7	1886.3	2190.68	-0.411469	0.0575772	-7.14639	8.90915e-13	1.90492e-11	51154	ENSG00000053372	MRTO4	MRT4 homolog, ribosome maturation factor	-0.362894	0.00127499	YES
102724084	14.0955	15.3831	11.7881	5.89013	4.99922	4.27007	9.40435	-0.411463	0.187082	-2.19937	0.0278516	0.0791084	102724084	NA	LOC102724084	uncharacterized LOC102724084	0.438687	0.183883
22854	1770.61	1534.26	1640.69	1234.96	1226.81	1222.31	1438.27	-0.411458	0.0668374	-6.15611	7.45542e-10	1.12327e-08	22854	ENSG00000162631	NTNG1	netrin G1	-0.835342	1.8488e-12
84333	2157.7	1995.75	1999.69	1571.68	1343.79	1667.46	1789.35	-0.41122	0.0725338	-5.66936	1.43332e-08	1.8209e-07	84333	ENSG00000180628	PCGF5	polycomb group ring finger 5	0.332052	8.56772e-05	YES
57228	731.882	676.855	718.003	503.606	518.919	555.109	617.396	-0.410972	0.0841106	-4.88609	1.02857e-06	9.50791e-06	57228	ENSG00000170545	SMAGP	small cell adhesion glycoprotein	-0.423578	0.00178262
55966	46.6236	46.9588	56.7972	30.4324	32.9949	33.093	41.15	-0.41085	0.195766	-2.09868	0.0358449	0.0967572	55966	ENSG00000196581	AJAP1	adherens junctions associated protein 1	1.32747	3.67474e-15
79628	181.073	153.021	162.89	96.2055	131.979	125.967	141.856	-0.41055	0.148924	-2.75678	0.00583743	0.0216616	79628	ENSG00000169247	SH3TC2	SH3 domain and tetratricopeptide repeats 2	0.365152	0.217696	YES
2745	1398.71	1184.5	1171.31	909.044	927.856	955.427	1091.14	-0.410387	0.076987	-5.33061	9.78839e-08	1.07927e-06	2745	ENSG00000173221	GLRX	glutaredoxin	0.271773	0.0716796	YES
90102	6603.2	6402.59	6509.18	4939.86	4618.28	5066.43	5689.92	-0.410284	0.0481828	-8.51517	1.66349e-17	5.78825e-16	90102	ENSG00000144824	PHLDB2	pleckstrin homology like domain family B member 2	-0.0756356	0.521241	YES
4499	33.6124	16.1927	13.9314	8.8352	10.9983	9.60765	15.5296	-0.41026	0.198603	-2.06573	0.0388538	0.103144	4499	ENSG00000205364	MT1M	metallothionein 1M	-1.31958	6.47657e-06
23327	7203.89	6819.56	6959.27	5171.54	5119.2	5439	6118.74	-0.410145	0.0464073	-8.83793	9.751e-19	3.79211e-17	23327	ENSG00000049759	NEDD4L	NEDD4 like E3 ubiquitin protein ligase	-0.190787	0.0580825	YES
203111	108.427	101.204	85.7317	64.7915	66.9896	73.6586	83.4671	-0.409977	0.16956	-2.41789	0.0156107	0.0490363	203111	ENSG00000177459	ERICH5	glutamate rich 5	-0.037863	0.917699
115207	1122.22	1063.05	1049.14	811.857	796.876	802.772	940.986	-0.409976	0.070733	-5.7961	6.78744e-09	9.06162e-08	115207	ENSG00000178695	KCTD12	potassium channel tetramerization domain containing 12	-1.87307	1.23182e-25
80746	248.298	182.168	221.831	171.796	149.977	146.25	186.72	-0.409969	0.138324	-2.96384	0.0030383	0.0123474	80746	ENSG00000154743	TSEN2	tRNA splicing endonuclease subunit 2	0.356195	0.0194642	YES
54941	59.6348	39.6721	38.5792	24.5422	26.9958	34.1605	37.2641	-0.409229	0.200436	-2.04169	0.0411823	0.108316	54941	ENSG00000101695	RNF125	ring finger protein 125	-0.512671	0.137753
4176	9921.07	10597.3	10338.2	7518.76	8003.76	7634.88	9002.32	-0.409179	0.045464	-9.00007	2.25582e-19	9.25168e-18	4176	ENSG00000166508	MCM7	minichromosome maintenance complex component 7	0.345029	9.26837e-05	YES
7409	70.4775	57.4841	65.3704	41.2309	32.9949	53.3758	53.4889	-0.409082	0.19013	-2.1516	0.0314289	0.0871281	7409	ENSG00000141968	VAV1	vav guanine nucleotide exchange factor 1	0.155386	0.61561
10736	15.1798	20.2409	21.4329	9.81689	10.9983	5.33758	13.8344	-0.409057	0.198037	-2.06556	0.0388701	0.103154	10736	ENSG00000170577	SIX2	SIX homeobox 2	-0.538578	0.0705806
23216	5034.26	4649.73	4872.77	3495.79	3636.43	3785.41	4245.74	-0.407993	0.0514973	-7.9226	2.32601e-15	6.68597e-14	23216	ENSG00000065882	TBC1D1	TBC1 domain family member 1	-0.260445	0.00760918	YES	YES
91687	483.584	471.208	425.443	363.225	317.951	339.47	400.147	-0.407817	0.100619	-4.05306	5.05527e-05	0.000334081	91687	ENSG00000120334	CENPL	centromere protein L	0.342439	0.00444223
57709	3965.17	3772.9	3833.28	2869.48	2811.56	3003.99	3376.06	-0.407321	0.0507053	-8.03311	9.5032e-16	2.81485e-14	57709	ENSG00000013293	SLC7A14	solute carrier family 7 member 14	-1.12508	1.3595e-09
201176	28.191	184.597	212.186	29.4507	21.9966	40.5656	86.1644	-0.407111	0.164746	-2.47114	0.0134683	0.0433926	201176	ENSG00000159314	ARHGAP27	Rho GTPase activating protein 27	0.14681	0.720321
100126784	774.168	839.591	721.218	576.251	587.909	577.526	679.444	-0.406978	0.0833127	-4.88495	1.03456e-06	9.54201e-06	100126784	NA	LOC100126784	uncharacterized LOC100126784	-0.871411	4.56412e-08
10455	2291.06	2045.14	2263.32	1665.93	1578.75	1694.15	1923.06	-0.406928	0.0625123	-6.50956	7.53696e-11	1.28556e-09	10455	ENSG00000198721	ECI2	enoyl-CoA delta isomerase 2	0.0891557	0.500336	YES
100129215	53.1292	35.6239	47.1524	26.5056	23.9963	34.1605	36.7613	-0.406847	0.200245	-2.03174	0.0421796	0.110535	100129215	ENSG00000226180	LOC100129215	uncharacterized LOC100129215	-0.47263	0.136687
10370	15843.3	16155.5	15437.1	11551.5	12309.1	11822.7	13853.2	-0.406384	0.0424986	-9.5623	1.15167e-21	5.68202e-20	10370	ENSG00000164442	CITED2	Cbp/p300 interacting transactivator with Glu/Asp rich carboxy-terminal domain 2	0.467072	6.18062e-10	YES
11151	229.865	238.033	253.98	157.07	198.969	169.735	207.942	-0.406297	0.128458	-3.16289	0.00156213	0.00694431	11151	ENSG00000102879	CORO1A	coronin 1A	-0.548658	0.00066951
55270	1056.08	968.323	971.983	771.608	736.885	728.046	872.154	-0.406168	0.0744852	-5.453	4.95271e-08	5.78096e-07	55270	ENSG00000136159	NUDT15	nudix hydrolase 15	0.164967	0.157933
4286	1294.62	1216.07	1281.69	933.586	925.856	977.845	1104.94	-0.405973	0.0677419	-5.99294	2.06086e-09	2.94908e-08	4286	ENSG00000187098	MITF	melanocyte inducing transcription factor	-0.00073176	0.997126	YES
9894	2927.53	2994.84	2949.17	2075.29	2442.62	2133.97	2587.24	-0.405727	0.0621094	-6.53245	6.47008e-11	1.10816e-09	9894	ENSG00000100726	TELO2	telomere maintenance 2	-0.212185	0.00608966	YES
79172	985.601	951.321	1022.35	741.175	730.886	738.721	861.676	-0.405719	0.0729567	-5.56109	2.681e-08	3.2606e-07	79172	ENSG00000138092	CENPO	centromere protein O	-0.10917	0.2599	YES
201725	920.545	852.546	930.188	693.072	640.9	682.143	786.566	-0.405703	0.0775785	-5.22959	1.69888e-07	1.80922e-06	201725	ENSG00000205208	C4orf46	chromosome 4 open reading frame 46	-0.256832	0.00887754
54976	1234.98	1339.95	1299.91	976.781	984.847	941.55	1129.67	-0.405694	0.0676021	-6.00121	1.95856e-09	2.80755e-08	54976	ENSG00000101220	C20orf27	chromosome 20 open reading frame 27	-0.00916768	0.966408
728927	166.977	154.64	170.392	122.711	117.982	113.157	140.976	-0.405423	0.142714	-2.8408	0.00449999	0.0173572	728927	ENSG00000234444	ZNF736	zinc finger protein 736	-0.593469	0.0149991
4869	24672.6	22069.8	23574.1	17860.8	17197.3	17840.3	20535.8	-0.405015	0.046751	-8.66324	4.58556e-18	1.69553e-16	4869	ENSG00000181163	NPM1	nucleophosmin 1	0.0992354	0.441721	YES
5902	6035.04	5462.61	5916.56	4178.07	4743.26	4153.71	5081.54	-0.404127	0.0588061	-6.87219	6.32226e-12	1.23224e-10	5902	ENSG00000099901	RANBP1	RAN binding protein 1	0.172742	0.212482	YES
79899	923.798	1012.04	965.553	726.45	765.881	678.941	845.444	-0.403641	0.0771198	-5.23394	1.6593e-07	1.77164e-06	79899	ENSG00000135362	PRR5L	proline rich 5 like	-0.131808	0.514729
1756	842.477	814.493	794.089	656.75	533.917	638.375	713.35	-0.402678	0.0863793	-4.66175	3.13537e-06	2.67396e-05	1756	ENSG00000198947	DMD	dystrophin	-0.315862	0.0409289	YES
63979	1422.56	1492.97	1462.8	1170.17	1066.83	1049.37	1277.45	-0.402651	0.0669067	-6.01809	1.76485e-09	2.54533e-08	63979	ENSG00000132436	FIGNL1	fidgetin like 1	0.0625474	0.603496
65983	1760.85	1638.7	1711.42	1247.73	1265.8	1325.86	1491.73	-0.402231	0.0623278	-6.45347	1.09318e-10	1.83246e-09	65983	ENSG00000155324	GRAMD2B	GRAM domain containing 2B	-0.273288	0.00350981
9462	1932.17	1910.74	2013.62	1464.68	1422.78	1516.94	1710.15	-0.402037	0.0592544	-6.78493	1.1614e-11	2.18133e-10	9462	ENSG00000075391	RASAL2	RAS protein activator like 2	0.125212	0.398707
444	14602.9	14352.4	14099.6	10980.2	10675.3	10857.7	12594.7	-0.4013	0.0396774	-10.1141	4.78608e-24	2.87652e-22	444	ENSG00000198363	ASPH	aspartate beta-hydroxylase	-0.566822	1.5019e-10	YES
5217	10091.3	9296.23	9808.77	7666.01	7128.89	7219.61	8535.14	-0.401207	0.048082	-8.34421	7.16894e-17	2.31875e-15	5217	ENSG00000070087	PFN2	profilin 2	0.124573	0.134179
29899	1114.63	1118.92	1011.63	816.765	781.878	838.001	946.97	-0.400797	0.0735782	-5.44723	5.11606e-08	5.95481e-07	29899	ENSG00000121957	GPSM2	G protein signaling modulator 2	0.424961	5.29338e-07	YES
10217	2075.29	1967.41	2039.34	1537.32	1491.77	1548.97	1776.68	-0.400794	0.0578032	-6.93377	4.09772e-12	8.15008e-11	10217	ENSG00000144677	CTDSPL	CTD small phosphatase like	0.10754	0.297708	YES
7884	4833.67	4690.22	4751.68	3510.52	3647.43	3614.61	4174.69	-0.400712	0.0463943	-8.63709	5.76644e-18	2.09929e-16	7884	ENSG00000163950	SLBP	stem-loop binding protein	0.0386519	0.778402	YES
55625	4215.64	4133.19	4165.49	3177.73	3100.52	3166.25	3659.8	-0.400476	0.0468549	-8.54714	1.26171e-17	4.45589e-16	55625	ENSG00000153786	ZDHHC7	zinc finger DHHC-type palmitoyltransferase 7	-0.310686	0.00131169	YES
283431	254.803	231.556	223.974	188.484	147.977	182.545	204.89	-0.400431	0.130215	-3.07514	0.00210403	0.00895581	283431	ENSG00000139354	GAS2L3	growth arrest specific 2 like 3	-0.0139325	0.953115
8193	181.073	180.549	168.248	119.766	133.979	131.305	152.487	-0.400425	0.139074	-2.87922	0.00398659	0.0156194	8193	ENSG00000011332	DPF1	double PHD fingers 1	-0.292751	0.126884
154141	351.303	332.76	378.291	245.422	267.958	272.217	307.992	-0.400124	0.109432	-3.65638	0.000255803	0.00141449	154141	ENSG00000172197	MBOAT1	membrane bound O-acyltransferase domain containing 1	-0.106844	0.605041
56975	13424.3	14844.7	14154.3	11031.2	9768.48	11185.4	12401.4	-0.400117	0.0553447	-7.22955	4.84605e-13	1.0708e-11	56975	ENSG00000177706	FAM20C	FAM20C golgi associated secretory pathway kinase	-0.436632	1.01509e-06
6322	1459.43	1332.66	1274.19	1071.02	971.849	1009.87	1186.5	-0.399799	0.0718189	-5.56676	2.59518e-08	3.16788e-07	6322	ENSG00000047634	SCML1	Scm polycomb group protein like 1	0.420461	0.000537249
55855	81.3202	76.9153	80.3734	64.7915	41.9935	56.5784	66.9954	-0.399553	0.180918	-2.20848	0.0272107	0.0775279	55855	NA	DENND10P1	DENND10 pseudogene 1	0.748173	4.78031e-05
55003	740.556	607.226	698.713	457.467	495.923	568.986	594.812	-0.399469	0.0974334	-4.09992	4.13302e-05	0.000278591	55003	ENSG00000111845	PAK1IP1	PAK1 interacting protein 1	0.0138518	0.935808	YES
440081	298.174	331.95	368.646	272.91	241.962	220.976	289.103	-0.399326	0.117913	-3.38661	0.000707614	0.00347355	440081	NA	DDX12P	DEAD/H-box helicase 12, pseudogene	0.143577	0.499778
83463	172.399	221.84	250.765	142.345	175.973	149.452	185.462	-0.399297	0.142262	-2.80677	0.00500416	0.0190705	83463	ENSG00000213347	MXD3	MAX dimerization protein 3	0.543785	0.00143436
81610	967.168	887.36	929.117	664.603	695.892	726.979	811.853	-0.399252	0.0766004	-5.21214	1.86673e-07	1.9702e-06	81610	ENSG00000101447	FAM83D	family with sequence similarity 83 member D	0.20221	0.0392778
3110	345.882	318.996	327.924	211.063	296.954	220.976	286.966	-0.399191	0.123201	-3.24015	0.00119466	0.00549167	3110	ENSG00000130675	MNX1	motor neuron and pancreas homeobox 1	-1.30747	2.50093e-09
10682	1328.23	1343.99	1270.97	1000.34	1027.84	938.347	1151.62	-0.399157	0.0677846	-5.88862	3.89442e-09	5.36392e-08	10682	ENSG00000147155	EBP	EBP cholestenol delta-isomerase	0.0480998	0.781467	YES	YES
29103	457.562	442.061	481.169	351.445	342.947	333.065	401.375	-0.399045	0.0971536	-4.10736	4.00208e-05	0.000270427	29103	ENSG00000120675	DNAJC15	DnaJ heat shock protein family (Hsp40) member C15	0.734757	4.60427e-10	YES
9188	6616.21	5971.87	6180.18	4732.72	4596.29	4840.12	5489.56	-0.398856	0.0504441	-7.9069	2.63867e-15	7.50637e-14	9188	ENSG00000165732	DDX21	DExD-box helicase 21	0.104393	0.308598	YES
11200	500.932	432.345	528.321	394.639	330.949	357.618	424.134	-0.398485	0.10431	-3.8202	0.000133342	0.000794784	11200	ENSG00000183765	CHEK2	checkpoint kinase 2	0.918405	6.78987e-12
55055	1513.64	1339.95	1392.07	1057.28	985.847	1147.58	1239.39	-0.397729	0.0733813	-5.42003	5.95887e-08	6.84421e-07	55055	ENSG00000174442	ZWILCH	zwilch kinetochore protein	0.307622	5.27046e-05
27296	55.2977	43.7203	48.2241	29.4507	40.9936	23.4854	40.1953	-0.39728	0.198553	-2.00087	0.0454059	0.116986	27296	ENSG00000124251	TP53TG5	TP53 target 5	0.0255406	NA
79968	1424.73	1423.34	1345.99	1061.21	1044.84	1056.84	1226.16	-0.39723	0.064559	-6.15297	7.60448e-10	1.14053e-08	79968	ENSG00000092470	WDR76	WD repeat domain 76	-0.0515079	0.677478	YES
84296	1746.76	1559.36	1651.41	1296.81	1157.82	1276.75	1448.15	-0.396968	0.068305	-5.8117	6.18403e-09	8.28951e-08	84296	ENSG00000147536	GINS4	GINS complex subunit 4	-0.041782	0.806617	YES
3598	28.191	22.6698	18.218	12.762	12.998	10.6752	17.5856	-0.396696	0.203013	-1.95404	0.0506964	0.127828	3598	ENSG00000123496	IL13RA2	interleukin 13 receptor subunit alpha 2	-0.0309698	NA
84541	291.668	196.741	257.195	193.393	163.974	183.613	214.431	-0.396633	0.137878	-2.87669	0.00401873	0.0157173	84541	ENSG00000163376	KBTBD8	kelch repeat and BTB domain containing 8	-0.372981	0.0338433
56902	1112.46	968.323	1070.57	814.802	761.882	788.895	919.489	-0.396599	0.0762449	-5.20165	1.97527e-07	2.07284e-06	56902	ENSG00000115946	PNO1	partner of NOB1 homolog	-0.00605442	0.967084	YES
5792	19824.8	20949.3	20905.7	15110.2	16524.4	15056.3	18061.8	-0.396282	0.0472356	-8.38948	4.88315e-17	1.61417e-15	5792	ENSG00000142949	PTPRF	protein tyrosine phosphatase receptor type F	-0.605796	4.77139e-09
107	116.017	106.062	100.735	70.6816	74.9883	83.2663	91.9583	-0.396254	0.164157	-2.41387	0.0157843	0.0494706	107	ENSG00000164742	ADCY1	adenylate cyclase 1	-0.520173	0.111795	YES	YES
285958	325.281	311.709	335.425	222.843	244.962	253.001	282.204	-0.396139	0.111959	-3.53825	0.000402784	0.00210339	285958	ENSG00000232956	SNHG15	small nucleolar RNA host gene 15	-0.0886608	0.632377
25758	2023.25	2123.67	2142.22	1548.12	1525.76	1678.14	1840.19	-0.396088	0.0604534	-6.55196	5.67858e-11	9.76645e-10	25758	ENSG00000110427	KIAA1549L	KIAA1549 like	-1.07773	1.08063e-06
6769	1159.08	1143.2	1078.08	837.381	859.866	850.811	988.07	-0.396008	0.0698401	-5.6702	1.4263e-08	1.81338e-07	6769	ENSG00000144681	STAC	SH3 and cysteine rich domain	0.0496029	0.772377
26354	2851.63	2541.44	2703.76	2000.68	2095.67	2016.54	2368.29	-0.395942	0.0582524	-6.79701	1.06814e-11	2.01762e-10	26354	ENSG00000163938	GNL3	G protein nucleolar 3	0.247167	0.00845784	YES
953	569.241	557.029	530.465	379.914	421.934	438.749	482.889	-0.395604	0.0929854	-4.25447	2.09543e-05	0.000152033	953	ENSG00000138185	ENTPD1	ectonucleoside triphosphate diphosphohydrolase 1	0.0006906	0.99881
152225	112.764	79.3442	82.5167	69.6999	44.993	73.6586	77.1628	-0.394912	0.181466	-2.17624	0.0295376	0.0829422	152225	ENSG00000214407	LINC02085	long intergenic non-protein coding RNA 2085	-0.899014	0.00545305
5901	13366.9	12217.4	12942.3	9531.22	9740.49	9922.57	11286.8	-0.394888	0.0455042	-8.67804	4.02635e-18	1.5056e-16	5901	ENSG00000132341	RAN	RAN, member RAS oncogene family	-0.18549	0.160427	YES
4801	725.376	669.568	695.498	489.863	543.915	534.826	609.841	-0.394744	0.0848277	-4.65349	3.2637e-06	2.76912e-05	4801	ENSG00000120837	NFYB	nuclear transcription factor Y subunit beta	0.433732	4.66646e-07	YES
80303	338.292	291.469	296.846	204.191	267.958	210.301	268.176	-0.394665	0.123053	-3.20727	0.00134002	0.00608291	80303	ENSG00000115468	EFHD1	EF-hand domain family member D1	1.10972	4.53534e-09
158219	208.18	204.028	235.762	146.272	158.975	169.735	187.159	-0.394609	0.13161	-2.99832	0.0027147	0.011192	158219	ENSG00000155158	TTC39B	tetratricopeptide repeat domain 39B	-0.327017	0.226598	YES
9517	4191.79	4148.57	4206.21	3258.23	2945.54	3296.49	3674.47	-0.394334	0.0534247	-7.38112	1.56959e-13	3.70604e-12	9517	ENSG00000100596	SPTLC2	serine palmitoyltransferase long chain base subunit 2	-0.607826	1.3194e-11	YES
163126	1377.02	1395	1394.21	950.275	1164.82	1024.82	1217.69	-0.394248	0.0742716	-5.3082	1.10714e-07	1.21103e-06	163126	ENSG00000176396	EID2	EP300 interacting inhibitor of differentiation 2	0.24384	0.102611
5634	2544.78	2389.23	2480.86	1832.81	1875.71	1903.38	2171.13	-0.39385	0.055194	-7.13573	9.62721e-13	2.0426e-11	5634	ENSG00000101911	PRPS2	phosphoribosyl pyrophosphate synthetase 2	0.180407	0.0454864	YES
6545	8.67416	8.90599	12.8597	1.96338	0.999845	4.27007	6.27886	-0.393636	0.16701	-2.35696	0.0184252	0.0560111	6545	ENSG00000099960	SLC7A4	solute carrier family 7 member 4	0.603739	0.0320778
221710	2172.88	1944.74	1999.69	1507.87	1510.77	1604.48	1790.07	-0.393627	0.0625429	-6.29372	3.09956e-10	4.93066e-09	221710	ENSG00000224531	SMIM13	small integral membrane protein 13	-0.394169	6.78493e-05	YES
8291	3920.72	4082.18	4175.13	2927.4	3284.49	3011.46	3566.9	-0.393587	0.0550885	-7.14463	9.02381e-13	1.92694e-11	8291	ENSG00000135636	DYSF	dysferlin	-0.275098	0.144447
51390	2566.47	2437	2640.54	1995.77	1841.71	1945.02	2237.75	-0.393551	0.0577872	-6.81035	9.73625e-12	1.84966e-10	51390	ENSG00000146416	AIG1	androgen induced 1	0.549465	3.15882e-12	YES
101927667	7.58989	19.4312	16.0747	5.89013	6.99891	3.20255	9.86457	-0.393386	0.185166	-2.12451	0.0336279	0.0920354	101927667	ENSG00000226686	LINC01535	long intergenic non-protein coding RNA 1535	0.0909553	NA
79987	65.0562	57.4841	53.5823	29.4507	41.9935	45.9032	48.9116	-0.393303	0.192428	-2.04389	0.0409639	0.107862	79987	ENSG00000165124	SVEP1	sushi, von Willebrand factor type A, EGF and pentraxin domain containing 1	-0.490936	0.0733131	YES	YES
8659	2510.08	2466.15	2575.16	1897.6	1975.69	1844.67	2211.56	-0.393121	0.0552461	-7.11581	1.11258e-12	2.34251e-11	8659	ENSG00000159423	ALDH4A1	aldehyde dehydrogenase 4 family member A1	-0.199075	0.0809363	YES
1843	6792.95	7074.59	6976.41	5053.73	5302.18	5463.55	6110.57	-0.393082	0.0466695	-8.42267	3.68011e-17	1.23628e-15	1843	ENSG00000120129	DUSP1	dual specificity phosphatase 1	0.0986156	0.385499	YES	YES
10615	799.107	765.915	860.532	573.306	644.9	605.282	708.173	-0.392639	0.0826265	-4.75198	2.01435e-06	1.77754e-05	10615	ENSG00000076382	SPAG5	sperm associated antigen 5	0.282552	0.0242329
83697	9.75843	5.66745	9.64481	1.96338	0	1.06752	4.6836	-0.392376	0.151466	-2.59053	0.00958292	NA	83697	ENSG00000113073	SLC4A9	solute carrier family 4 member 9	-0.026018	NA
126969	199.506	173.262	187.538	129.583	143.978	135.575	161.573	-0.39237	0.137233	-2.85915	0.00424772	0.0164804	126969	ENSG00000143036	SLC44A3	solute carrier family 44 member 3	0.582464	0.0032916
84365	1414.97	1322.94	1344.92	1064.15	978.848	1041.9	1194.62	-0.392328	0.0672463	-5.8342	5.40507e-09	7.30457e-08	84365	ENSG00000155438	NIFK	nucleolar protein interacting with the FHA domain of MKI67	-0.236166	0.0287959	YES
122416	2115.41	2086.43	2037.2	1516.71	1764.73	1430.47	1825.16	-0.392292	0.0703831	-5.57367	2.49432e-08	3.05606e-07	122416	ENSG00000156381	ANKRD9	ankyrin repeat domain 9	0.0942336	0.630526
9064	1725.07	1817.63	1778.93	1297.79	1423.78	1307.71	1558.49	-0.392201	0.0627163	-6.25358	4.01159e-10	6.21984e-09	9064	ENSG00000142733	MAP3K6	mitogen-activated protein kinase kinase kinase 6	-0.40711	0.000390637
2177	896.691	769.153	873.391	686.201	556.913	660.793	740.524	-0.392198	0.0900681	-4.35447	1.33391e-05	0.000100484	2177	ENSG00000144554	FANCD2	FA complementation group D2	0.150029	0.131007
84154	1227.39	1076	1225.96	900.209	880.863	878.566	1031.5	-0.392106	0.0736178	-5.32624	1.00266e-07	1.1048e-06	84154	ENSG00000197498	RPF2	ribosome production factor 2 homolog	0.21944	0.0868443	YES
57636	906.449	587.795	761.94	495.753	599.907	577.526	654.895	-0.391918	0.113735	-3.44588	0.000569195	0.00286121	57636	ENSG00000275832	ARHGAP23	Rho GTPase activating protein 23	-0.346117	0.0776471	YES	YES
55010	273.236	250.987	263.625	215.972	162.975	201.761	228.092	-0.391765	0.126315	-3.10148	0.00192556	0.00830955	55010	ENSG00000185480	PARPBP	PARP1 binding protein	0.314077	0.00120498
154807	2887.41	2739.8	2926.66	2137.14	2164.66	2184.14	2506.64	-0.391608	0.0533149	-7.34519	2.05465e-13	4.783e-12	154807	ENSG00000196715	VKORC1L1	vitamin K epoxide reductase complex subunit 1 like 1	0.113297	0.209949
304	3571.58	3221.54	3228.87	2576.93	2391.63	2625.02	2935.93	-0.391471	0.0587521	-6.6631	2.68105e-11	4.80612e-10	304	NA	ANXA2P2	annexin A2 pseudogene 2	0.119941	0.433853
93517	473.826	412.104	442.59	328.866	349.946	312.782	386.686	-0.39121	0.101514	-3.85376	0.000116316	0.00070575	93517	ENSG00000184860	SDR42E1	short chain dehydrogenase/reductase family 42E, member 1	-0.139672	0.360849
5090	1710.98	1509.97	1586.04	1248.71	1123.83	1259.67	1406.53	-0.391073	0.0698017	-5.60263	2.11118e-08	2.61768e-07	5090	ENSG00000167081	PBX3	PBX homeobox 3	-0.250906	0.00609687	YES
5167	748.146	706.811	765.155	570.361	475.926	620.227	647.771	-0.391013	0.0927998	-4.21352	2.51426e-05	0.000178198	5167	ENSG00000197594	ENPP1	ectonucleotide pyrophosphatase/phosphodiesterase 1	0.26646	0.0266993
285489	127.944	148.163	147.887	100.132	108.983	98.2115	121.887	-0.390521	0.150781	-2.58999	0.00959794	0.0327825	285489	ENSG00000175920	DOK7	docking protein 7	0.161246	0.511566
1841	2528.52	2611.07	2592.31	1956.51	2011.69	1903.38	2267.25	-0.39019	0.0539161	-7.23698	4.58778e-13	1.01918e-11	1841	ENSG00000168393	DTYMK	deoxythymidylate kinase	0.0532545	0.773479	YES
6456	31.4438	22.6698	16.0747	16.6887	8.9986	10.6752	17.7585	-0.39005	0.201937	-1.93154	0.0534157	0.133362	6456	ENSG00000107295	SH3GL2	SH3 domain containing GRB2 like 2, endophilin A1	-0.044035	0.91802
23649	1877.95	1863.78	2007.19	1380.25	1498.77	1478.51	1684.41	-0.390017	0.0619393	-6.29676	3.03932e-10	4.83949e-09	23649	ENSG00000014138	POLA2	DNA polymerase alpha 2, accessory subunit	0.022799	0.85372
144100	279.742	301.184	302.204	216.953	224.965	215.638	256.781	-0.389777	0.114665	-3.39925	0.00067571	0.00333178	144100	ENSG00000166689	PLEKHA7	pleckstrin homology domain containing A7	0.824545	3.81984e-08	YES
441046	66.1404	70.4382	62.1555	40.2492	50.9921	44.8357	55.8019	-0.389589	0.185773	-2.09713	0.0359821	0.0970957	441046	ENSG00000236296	GUSBP5	GUSB pseudogene 5	-0.726322	0.0154484
1104	1992.89	2161.73	2222.59	1568.74	1649.74	1621.56	1869.54	-0.38943	0.0608382	-6.40107	1.5429e-10	2.53994e-09	1104	ENSG00000180198	RCC1	regulator of chromosome condensation 1	-0.183802	0.0467366
100996761	11.927	8.09635	13.9314	4.90845	2.99953	2.13503	7.33295	-0.389167	0.174991	-2.22392	0.0261537	0.0750465	100996761	NA	NA	NA	-0.113407	0.793716
7443	915.123	820.16	870.176	677.365	635.901	652.253	761.83	-0.389125	0.0785196	-4.95576	7.20464e-07	6.86479e-06	7443	ENSG00000100749	VRK1	VRK serine/threonine kinase 1	0.0672067	0.591477	YES
55972	885.848	801.539	831.597	697.981	561.913	636.24	735.853	-0.389047	0.0868062	-4.48179	7.40196e-06	5.88454e-05	55972	ENSG00000075303	SLC25A40	solute carrier family 25 member 40	0.168147	0.0805238
79047	10.8427	8.90599	21.4329	6.87182	4.99922	2.13503	9.19795	-0.38887	0.181099	-2.14728	0.0317709	0.0878845	79047	ENSG00000153885	KCTD15	potassium channel tetramerization domain containing 15	-0.171758	NA	YES
55686	99.7528	103.633	118.953	71.6633	75.9882	82.1988	92.0315	-0.388852	0.164411	-2.36512	0.0180244	0.0549949	55686	ENSG00000118242	MREG	melanoregulin	-0.0735272	0.758066
5036	9609.88	8904.37	9462.63	7036.75	7123.89	7132.08	8211.6	-0.388703	0.0447435	-8.68737	3.70928e-18	1.39018e-16	5036	ENSG00000170515	PA2G4	proliferation-associated 2G4	0.0403671	0.744333	YES
117178	649.477	603.988	636.558	500.661	466.927	454.762	552.062	-0.388546	0.0872086	-4.45536	8.37515e-06	6.58224e-05	117178	ENSG00000117155	SSX2IP	SSX family member 2 interacting protein	0.338139	4.04642e-05	YES
81929	1889.88	1739.1	1866.81	1396.94	1340.79	1430.47	1610.67	-0.388436	0.0621056	-6.25444	3.9894e-10	6.19707e-09	81929	ENSG00000085415	SEH1L	SEH1 like nucleoporin	-0.0306783	0.83967	YES
81620	3281	3295.21	3386.4	2392.38	2630.59	2553.5	2923.18	-0.388145	0.0535116	-7.25348	4.06196e-13	9.03582e-12	81620	ENSG00000167513	CDT1	chromatin licensing and DNA replication factor 1	-0.101225	0.37165
51633	1130.89	1097.06	1077	891.374	796.876	813.448	967.775	-0.388127	0.0725808	-5.34751	8.9173e-08	9.89827e-07	51633	ENSG00000155100	OTUD6B	OTU deubiquitinase 6B	-0.0862517	0.438838	YES
55222	1351	1300.27	1366.35	939.476	1112.83	989.588	1176.59	-0.387583	0.0726333	-5.33617	9.49322e-08	1.04882e-06	55222	ENSG00000172731	LRRC20	leucine rich repeat containing 20	0.554681	1.99255e-08	YES
10576	7506.4	6880.28	7309.7	5643.73	5311.17	5561.76	6368.84	-0.387363	0.0488117	-7.93587	2.09023e-15	6.06093e-14	10576	ENSG00000166226	CCT2	chaperonin containing TCP1 subunit 2	0.168524	0.0903691	YES
3838	6582.6	6156.46	6376.29	4735.67	4856.24	4967.15	5612.4	-0.387318	0.0466821	-8.29693	1.06837e-16	3.40888e-15	3838	ENSG00000182481	KPNA2	karyopherin subunit alpha 2	-0.0343698	0.749684
10248	1755.43	1701.85	1806.79	1233	1483.77	1271.41	1542.04	-0.387249	0.0711733	-5.44093	5.30021e-08	6.15181e-07	10248	ENSG00000172336	POP7	POP7 homolog, ribonuclease P/MRP subunit	0.2042	0.163092
65263	118.185	13.7638	132.884	12.762	15.9975	19.2153	52.1347	-0.387242	0.157048	-2.46575	0.0136726	0.0439054	65263	ENSG00000104524	PYCR3	pyrroline-5-carboxylate reductase 3	-0.058442	0.896128	YES
5982	2691.16	2621.6	2790.57	1963.38	2176.66	2019.74	2377.18	-0.387027	0.0576943	-6.70823	1.96996e-11	3.5898e-10	5982	ENSG00000049541	RFC2	replication factor C subunit 2	0.258722	0.0365526
339366	696.101	850.117	776.943	563.489	642.9	546.568	679.353	-0.387001	0.0913833	-4.23492	2.28628e-05	0.000164509	339366	ENSG00000185761	ADAMTSL5	ADAMTS like 5	0.0579942	0.813284
55732	589.843	548.123	519.748	427.035	404.937	416.331	484.336	-0.386942	0.0919869	-4.20649	2.59372e-05	0.000183514	55732	ENSG00000000460	C1orf112	chromosome 1 open reading frame 112	0.712199	6.40216e-10
11339	224.444	191.074	236.834	148.235	174.973	155.857	188.569	-0.386893	0.133971	-2.88789	0.00387833	0.0152474	11339	ENSG00000104147	OIP5	Opa interacting protein 5	0.516376	4.37043e-05
51176	266.73	263.131	244.335	208.118	168.974	197.491	224.797	-0.386859	0.124043	-3.11874	0.00181624	0.00788517	51176	ENSG00000138795	LEF1	lymphoid enhancer binding factor 1	-0.896302	0.00389027
6678	75557.3	80117.4	77321.4	60050.9	58600.9	59154.3	68467	-0.386539	0.0386487	-10.0013	1.50343e-23	8.71886e-22	6678	ENSG00000113140	SPARC	secreted protein acidic and cysteine rich	0.143134	0.0986432	YES
642280	44.455	32.3854	46.0808	28.469	20.9967	27.7554	33.3571	-0.386288	0.201667	-1.91547	0.0554322	0.137153	642280	ENSG00000198155	ZNF876P	zinc finger protein 876, pseudogene	-0.031806	0.923784
102724279	101.921	110.92	110.38	71.6633	87.9863	71.5236	92.399	-0.38611	0.164451	-2.34787	0.0188811	0.0572073	102724279	ENSG00000267453	CLEC4O	C-type lectin domain family 4 member O	-0.178881	0.486365
64858	1205.71	1155.35	1238.82	906.099	867.865	956.495	1055.06	-0.386064	0.0702687	-5.49411	3.92693e-08	4.64598e-07	64858	ENSG00000118655	DCLRE1B	DNA cross-link repair 1B	-0.114222	0.325603	YES
152519	240.708	204.838	185.395	140.382	152.976	170.803	182.517	-0.385998	0.137099	-2.81547	0.00487064	0.0186257	152519	ENSG00000163293	NIPAL1	NIPA like domain containing 1	-1.06009	1.9255e-09
8089	581.168	528.692	585.119	483.973	394.939	392.846	494.456	-0.385908	0.0987825	-3.90664	9.3587e-05	0.000580654	8089	ENSG00000127337	YEATS4	YEATS domain containing 4	0.310491	0.00655073	YES
79723	584.421	575.65	599.05	496.735	398.938	428.074	513.811	-0.385763	0.0948135	-4.06865	4.72864e-05	0.00031438	79723	ENSG00000152455	SUV39H2	suppressor of variegation 3-9 homolog 2	0.606564	8.82818e-07
4175	4184.2	3871.67	4078.68	3159.08	3008.53	3077.65	3563.3	-0.385358	0.0510791	-7.54434	4.54584e-14	1.14011e-12	4175	ENSG00000076003	MCM6	minichromosome maintenance complex component 6	0.134902	0.184869
100506930	186.494	196.741	162.89	126.638	119.981	154.79	157.922	-0.385253	0.142904	-2.69588	0.0070203	0.0251695	100506930	ENSG00000232677	LINC00665	long intergenic non-protein coding RNA 665	0.475974	0.039518
57110	10.8427	11.3349	21.4329	8.8352	0.999845	5.33758	9.79719	-0.384847	0.181139	-2.12459	0.0336207	0.092031	57110	ENSG00000127252	PLAAT1	phospholipase A and acyltransferase 1	-0.286667	0.45693
101926940	35.7809	30.7661	39.6509	21.5972	16.9974	26.6879	28.5801	-0.384118	0.203572	-1.88689	0.0591755	0.144554	101926940	ENSG00000271334	LINC02104	long intergenic non-protein coding RNA 2104	0.230441	0.511429
116832	382.747	371.622	442.59	284.69	325.949	285.027	348.771	-0.384037	0.108577	-3.53701	0.000404682	0.00211263	116832	ENSG00000163923	RPL39L	ribosomal protein L39 like	0.490682	0.0010246
80155	2807.17	2710.66	2816.28	2133.21	2010.69	2211.89	2448.32	-0.383369	0.0556171	-6.89301	5.46225e-12	1.07221e-10	80155	ENSG00000164134	NAA15	N-alpha-acetyltransferase 15, NatA auxiliary subunit	-0.414207	5.70354e-07	YES
5669	73.7303	62.3419	48.2241	40.2492	43.9932	40.5656	51.5174	-0.383112	0.1906	-2.01003	0.0444283	0.115096	5669	ENSG00000231924	PSG1	pregnancy specific beta-1-glycoprotein 1	1.12587	7.48965e-05
163486	531.292	519.786	521.891	408.383	337.947	438.749	459.675	-0.382879	0.100358	-3.81514	0.000136107	0.00080804	163486	ENSG00000213047	DENND1B	DENN domain containing 1B	-0.0690894	0.665159	YES
1033	513.944	460.682	449.02	342.609	350.945	378.968	416.028	-0.382772	0.0988472	-3.87236	0.000107785	0.000658828	1033	ENSG00000100526	CDKN3	cyclin dependent kinase inhibitor 3	0.450076	0.000216247
8520	3507.61	3440.14	3414.26	2714.37	2453.62	2740.32	3045.05	-0.382756	0.0550901	-6.94782	3.70977e-12	7.40521e-11	8520	ENSG00000128708	HAT1	histone acetyltransferase 1	0.378261	3.15802e-05	YES
2189	1885.54	1911.55	2095.07	1482.35	1553.76	1451.82	1730.02	-0.382531	0.062831	-6.08825	1.14153e-09	1.68608e-08	2189	ENSG00000221829	FANCG	FA complementation group G	0.120206	0.204625
11262	201.674	217.792	185.395	154.125	155.976	137.71	175.445	-0.382421	0.134295	-2.84762	0.00440468	0.0170334	11262	ENSG00000079263	SP140	SP140 nuclear body protein	-1.29965	2.82277e-05
26090	10355.9	10479.1	10428.2	8006.66	8096.74	7821.69	9198.04	-0.382133	0.040409	-9.45663	3.18026e-21	1.50611e-19	26090	ENSG00000100997	ABHD12	abhydrolase domain containing 12, lysophospholipase	0.286044	0.00146671	YES
81853	3903.37	3532.44	3718.61	2881.26	2827.56	2805.43	3278.11	-0.3821	0.052877	-7.22621	4.96654e-13	1.09595e-11	81853	ENSG00000137210	TMEM14B	transmembrane protein 14B	0.216179	0.291432
100125556	45.5393	35.6239	53.5823	35.3408	13.9978	34.1605	36.3741	-0.382099	0.203194	-1.88046	0.060045	0.146344	100125556	ENSG00000171084	FAM86JP	family with sequence similarity 86, member A pseudogene	-0.289329	0.287946
64236	1156.92	1315.66	1265.61	908.062	1013.84	923.402	1097.25	-0.381813	0.0738872	-5.16751	2.37236e-07	2.45371e-06	64236	ENSG00000120913	PDLIM2	PDZ and LIM domain 2	0.113905	0.413059	YES	YES
10486	1568.94	1406.34	1449.94	1099.49	1059.84	1207.36	1298.65	-0.381722	0.0706984	-5.3993	6.69004e-08	7.61522e-07	10486	ENSG00000112186	CAP2	cyclase associated actin cytoskeleton regulatory protein 2	0.168457	0.149178
302	71488.1	65952.9	71247.3	52592	53635.7	53529.6	61407.6	-0.381252	0.0422316	-9.02763	1.75423e-19	7.21241e-18	302	ENSG00000182718	ANXA2	annexin A2	0.333586	0.00244111	YES	YES
644596	57.4663	59.913	57.8689	38.2859	51.9919	26.6879	48.7023	-0.381168	0.194266	-1.96209	0.0497515	0.126077	644596	ENSG00000196972	SMIM10L2B	small integral membrane protein 10 like 2B	0.261472	0.49422
105378862	60.7191	63.1515	49.2957	41.2309	40.9936	35.228	48.4365	-0.381131	0.191203	-1.99333	0.0462248	0.118745	105378862	NA	NA	NA	-0.0512169	0.870097
101927279	23.8539	17.0023	21.4329	7.85351	5.99907	17.0803	15.537	-0.380897	0.199004	-1.91402	0.0556177	0.137542	101927279	NA	EP300-AS1	EP300 antisense RNA 1	-0.20026	0.58696
146857	969.337	939.986	958.051	754.919	644.9	778.22	840.902	-0.380746	0.0805088	-4.72925	2.25353e-06	1.97279e-05	146857	ENSG00000154760	SLFN13	schlafen family member 13	-0.0718328	0.571425
84641	5106.91	5065.89	4819.19	3902.21	3656.43	3912.45	4410.51	-0.380659	0.0497254	-7.65522	1.92982e-14	5.0537e-13	84641	ENSG00000148110	MFSD14B	major facilitator superfamily domain containing 14B	-0.232397	0.0105691	YES
10424	5272.8	4886.96	5199.63	3890.43	3991.38	3864.41	4517.6	-0.380643	0.0487273	-7.8117	5.64204e-15	1.55939e-13	10424	ENSG00000164040	PGRMC2	progesterone receptor membrane component 2	-0.126619	0.175891	YES
26053	1136.31	1210.4	1237.75	917.879	923.856	890.309	1052.75	-0.380512	0.0690966	-5.50696	3.6509e-08	4.33803e-07	26053	ENSG00000158321	AUTS2	activator of transcription and developmental regulator AUTS2	0.293293	0.0525084	YES
84959	4131.07	3623.93	3900.79	2981.39	2839.56	3080.85	3426.26	-0.3802	0.0577983	-6.57805	4.76654e-11	8.24936e-10	84959	ENSG00000154127	UBASH3B	ubiquitin associated and SH3 domain containing B	-0.913658	1.57334e-12
56913	1785.79	1755.29	1757.5	1456.83	1239.81	1344	1556.54	-0.380139	0.0663969	-5.72525	1.03282e-08	1.34625e-07	56913	ENSG00000106392	C1GALT1	core 1 synthase, glycoprotein-N-acetylgalactosamine 3-beta-galactosyltransferase 1	0.283794	0.0143463	YES
6240	6700.79	6019.64	6362.36	4902.55	4659.28	5034.41	5613.17	-0.379847	0.0521425	-7.28478	3.22193e-13	7.28483e-12	6240	ENSG00000167325	RRM1	ribonucleotide reductase catalytic subunit M1	0.349461	1.44336e-05	YES
51602	3263.65	3093.62	3125.99	2469.93	2353.63	2430.74	2789.59	-0.379728	0.0520355	-7.29748	2.93209e-13	6.66524e-12	51602	ENSG00000055044	NOP58	NOP58 ribonucleoprotein	-0.165382	0.161576	YES
28969	1547.25	1331.04	1513.16	1054.33	1139.82	1148.65	1289.04	-0.379205	0.0723568	-5.24076	1.59915e-07	1.71073e-06	28969	ENSG00000136261	BZW2	basic leucine zipper and W2 domains 2	0.118425	0.277103
79733	302.511	256.654	296.846	189.466	233.964	214.571	249.002	-0.378975	0.122373	-3.09688	0.0019557	0.00841109	79733	ENSG00000129173	E2F8	E2F transcription factor 8	0.398097	0.000962016
22927	1559.18	1514.83	1457.44	1137.78	1221.81	1099.54	1331.76	-0.378815	0.0661241	-5.72885	1.01111e-08	1.32004e-07	22927	ENSG00000130956	HABP4	hyaluronan binding protein 4	0.262243	0.00727013	YES
161357	225.528	230.746	229.332	185.539	165.974	159.06	199.363	-0.378809	0.126926	-2.9845	0.00284044	0.0116291	161357	ENSG00000139915	MDGA2	MAM domain containing glycosylphosphatidylinositol anchor 2	-1.53917	5.52624e-08
9792	2401.66	2392.47	2415.49	1861.28	1645.74	1999.46	2119.35	-0.378785	0.0659485	-5.74365	9.26597e-09	1.2203e-07	9792	ENSG00000179833	SERTAD2	SERTA domain containing 2	-0.175538	0.245277	YES
55351	975.843	1076.81	932.332	713.688	799.876	762.207	876.793	-0.378412	0.0793474	-4.76906	1.85088e-06	1.64558e-05	55351	ENSG00000152953	STK32B	serine/threonine kinase 32B	0.158688	0.345383
6632	1590.62	1331.04	1489.59	1090.66	1131.82	1136.91	1295.11	-0.37833	0.0723072	-5.23226	1.67453e-07	1.78559e-06	6632	ENSG00000167088	SNRPD1	small nuclear ribonucleoprotein D1 polypeptide	0.153213	0.218414	YES
133418	2389.73	2276.69	2112.21	1811.22	1558.76	1806.24	1992.47	-0.378127	0.0684822	-5.52154	3.3604e-08	4.01306e-07	133418	ENSG00000170571	EMB	embigin	-0.797557	2.05696e-09
54557	850.067	770.773	816.594	624.354	573.911	654.388	715.014	-0.378067	0.0820647	-4.60694	4.08647e-06	3.42154e-05	54557	ENSG00000197860	SGTB	small glutamine rich tetratricopeptide repeat containing beta	-0.140258	0.31924
2260	5233.77	5306.35	5484.68	4030.82	4221.34	4035.21	4718.7	-0.377913	0.0468389	-8.06835	7.12517e-16	2.13342e-14	2260	ENSG00000077782	FGFR1	fibroblast growth factor receptor 1	-0.0404985	0.786191	YES	YES
10024	254.803	236.413	270.055	192.411	167.974	207.098	221.459	-0.377884	0.125443	-3.01241	0.00259185	0.0107391	10024	ENSG00000135451	TROAP	trophinin associated protein	0.304675	0.000564064
79441	446.719	414.533	438.303	359.298	307.952	312.782	379.931	-0.3777	0.102182	-3.69633	0.000218741	0.00123265	79441	ENSG00000214367	HAUS3	HAUS augmin like complex subunit 3	-0.0454554	0.763755
119559	431.539	437.203	438.303	331.811	339.947	317.052	382.643	-0.377654	0.0980315	-3.85237	0.000116979	0.000708738	119559	ENSG00000183605	SFXN4	sideroflexin 4	0.467525	0.00115566	YES
143888	1187.28	1144.82	1102.72	929.659	746.884	937.28	1008.11	-0.377553	0.0828114	-4.55919	5.13504e-06	4.22459e-05	143888	ENSG00000178202	POGLUT3	protein O-glucosyltransferase 3	-0.358926	0.00286908
114898	62.8876	47.7685	60.0122	33.3774	44.993	36.2956	47.5557	-0.377479	0.192864	-1.95723	0.050321	0.127121	114898	ENSG00000145861	C1QTNF2	C1q and TNF related 2	0.135079	0.692664
896	3921.8	3995.55	3893.29	2755.6	3270.49	3015.73	3475.41	-0.377379	0.0594139	-6.35169	2.12967e-10	3.45428e-09	896	ENSG00000112576	CCND3	cyclin D3	-0.0982222	0.405325	YES
83872	936.809	1008	955.908	785.351	640.9	782.49	851.576	-0.377324	0.0837846	-4.50349	6.68455e-06	5.37104e-05	83872	ENSG00000143341	HMCN1	hemicentin 1	0.549315	0.00758392
374879	172.399	183.787	162.89	144.308	105.984	132.372	150.29	-0.3773	0.144865	-2.60449	0.00920102	0.0316426	374879	ENSG00000196110	ZNF699	zinc finger protein 699	-0.141342	0.673564
105369154	28.191	53.4359	36.436	35.3408	13.9978	22.4178	31.6366	-0.377253	0.204512	-1.84465	0.0650891	0.156093	105369154	ENSG00000270580	PKD1P6-NPIPP1	PKD1P6-NPIPP1 readthrough	-0.0302716	0.943894
140609	4223.23	3842.53	3941.51	3219.94	2864.55	3107.54	3533.22	-0.377191	0.0573287	-6.57944	4.7223e-11	8.18136e-10	140609	ENSG00000151414	NEK7	NIMA related kinase 7	0.25576	0.0206702	YES
347252	796.938	727.052	780.158	585.087	580.91	587.134	676.213	-0.376665	0.0803371	-4.68855	2.75146e-06	2.37101e-05	347252	ENSG00000137142	IGFBPL1	insulin like growth factor binding protein like 1	-0.500896	0.00666508
253512	927.05	865.5	876.606	685.219	655.898	693.886	784.027	-0.376599	0.0760088	-4.95468	7.24504e-07	6.89384e-06	253512	ENSG00000174032	SLC25A30	solute carrier family 25 member 30	0.0854579	0.485289
4001	3724.47	3758.33	3795.77	2885.18	2929.54	2840.66	3322.33	-0.376503	0.0479513	-7.85177	4.10211e-15	1.14527e-13	4001	ENSG00000113368	LMNB1	lamin B1	-0.244548	0.00563699
94121	483.584	578.079	537.966	425.071	375.942	413.129	468.962	-0.376487	0.0976052	-3.85724	0.000114673	0.000696886	94121	ENSG00000102362	SYTL4	synaptotagmin like 4	0.424177	0.00354684
9221	5070.04	4495.09	4852.41	3700.97	3693.43	3655.18	4244.52	-0.376449	0.0527811	-7.13226	9.87323e-13	2.08943e-11	9221	ENSG00000166197	NOLC1	nucleolar and coiled-body phosphoprotein 1	-0.0758833	0.414433	YES
5984	1438.83	1383.67	1528.17	1099.49	1131.82	1093.14	1279.19	-0.376448	0.0659048	-5.71199	1.1166e-08	1.44747e-07	5984	ENSG00000163918	RFC4	replication factor C subunit 4	0.199073	0.162591
768211	1581.95	1700.23	1673.91	1319.39	1205.81	1269.28	1458.43	-0.376356	0.0640181	-5.87891	4.12986e-09	5.64585e-08	768211	ENSG00000181826	RELL1	RELT like 1	-0.558064	0.000297679	YES
51668	1371.6	1321.32	1345.99	1012.12	1092.83	982.115	1187.66	-0.375997	0.067501	-5.57024	2.54391e-08	3.11219e-07	51668	ENSG00000081870	HSPB11	heat shock protein family B (small) member 11	0.103667	0.639548
90381	498.764	497.926	496.172	381.877	392.939	357.618	437.549	-0.375969	0.0936635	-4.01404	5.96881e-05	0.000386319	90381	ENSG00000140534	TICRR	TOPBP1 interacting checkpoint and replication regulator	-0.339674	0.0497465
114787	3458.82	3534.06	3512.85	2615.22	2831.56	2614.35	3094.48	-0.375849	0.0522786	-7.18935	6.5102e-13	1.41953e-11	114787	ENSG00000169258	GPRIN1	G protein regulated inducer of neurite outgrowth 1	-0.429534	1.68564e-05
153364	209.264	218.601	196.111	156.089	162.975	146.25	181.548	-0.375332	0.131161	-2.86162	0.00421485	0.0163644	153364	ENSG00000176055	MBLAC2	metallo-beta-lactamase domain containing 2	-0.0701576	0.731787	YES
9585	1061.5	942.415	967.696	827.564	662.897	770.747	872.136	-0.375135	0.0850533	-4.41059	1.03091e-05	7.93246e-05	9585	ENSG00000138182	KIF20B	kinesin family member 20B	0.619922	6.52236e-10
483	3088	2828.06	2847.36	2140.08	2308.64	2271.68	2580.64	-0.374855	0.057165	-6.55742	5.47482e-11	9.43564e-10	483	ENSG00000069849	ATP1B3	ATPase Na+/K+ transporting subunit beta 3	-0.123956	0.329147	YES
254295	509.607	475.256	447.948	360.28	399.938	323.458	419.414	-0.374853	0.102102	-3.67136	0.000241265	0.00134128	254295	ENSG00000175287	PHYHD1	phytanoyl-CoA dioxygenase domain containing 1	-0.669047	2.98468e-05
84255	879.343	872.787	860.532	703.871	628.902	661.86	767.882	-0.374842	0.0772744	-4.85079	1.22972e-06	1.11779e-05	84255	ENSG00000157800	SLC37A3	solute carrier family 37 member 3	-0.00675126	0.969911	YES
123811	28.191	24.2891	13.9314	12.762	4.99922	16.0127	16.6976	-0.374376	0.199341	-1.87807	0.0603723	0.147043	123811	ENSG00000133393	CEP20	centrosomal protein 20	-0.353468	0.332966	YES
142	7147.5	6777.45	7067.5	5217.68	5486.15	5439	6189.21	-0.373897	0.0456312	-8.19389	2.52918e-16	7.8135e-15	142	ENSG00000143799	PARP1	poly(ADP-ribose) polymerase 1	-0.144338	0.0383231	YES
10193	2177.21	1973.89	2119.72	1601.13	1548.76	1657.85	1846.43	-0.373563	0.0609462	-6.12939	8.82141e-10	1.31707e-08	10193	ENSG00000181852	RNF41	ring finger protein 41	0.0446987	0.688458	YES
10280	4312.14	4282.97	4416.25	3156.13	3527.45	3315.71	3835.11	-0.37341	0.052401	-7.12601	1.03321e-12	2.17817e-11	10280	ENSG00000147955	SIGMAR1	sigma non-opioid intracellular receptor 1	-0.0746108	0.536003	YES
3033	1520.15	1463.01	1484.23	1159.37	1122.83	1145.45	1315.84	-0.372524	0.0624837	-5.96195	2.49251e-09	3.52105e-08	3033	ENSG00000138796	HADH	hydroxyacyl-CoA dehydrogenase	0.104478	0.413944	YES
80114	9644.58	9513.21	9021.11	7192.84	7048.9	7460.87	8313.59	-0.37223	0.0454942	-8.18192	2.79346e-16	8.55006e-15	80114	ENSG00000122870	BICC1	BicC family RNA binding protein 1	-0.0400566	0.748444	YES
401431	71.5618	59.913	81.4451	59.883	49.9922	36.2956	59.8484	-0.372168	0.187748	-1.98228	0.0474482	0.121041	401431	ENSG00000204934	ATP6V0E2-AS1	ATP6V0E2 antisense RNA 1	-0.0566095	0.87819
10376	46863.2	41673.5	44974.8	33349	34700.6	34742.3	39383.9	-0.372089	0.0470371	-7.91054	2.56275e-15	7.30295e-14	10376	ENSG00000123416	TUBA1B	tubulin alpha 1b	-0.00922517	0.932643	YES
191585	26.0225	36.4336	40.7225	23.5605	10.9983	27.7554	27.5821	-0.371764	0.204639	-1.81668	0.0692663	0.163903	191585	ENSG00000280109	PLAC4	placenta enriched 4	NA	NA
343099	443.466	447.728	453.306	361.262	309.952	350.145	394.31	-0.371645	0.0995375	-3.73371	0.000188677	0.00108017	343099	ENSG00000122483	CCDC18	coiled-coil domain containing 18	0.149048	0.269846
116225	2469.97	2678.27	2583.74	1851.47	2244.65	1831.86	2276.66	-0.371615	0.0712129	-5.21836	1.80511e-07	1.91249e-06	116225	ENSG00000165724	ZMYND19	zinc finger MYND-type containing 19	-0.250657	0.0556099
995	146.376	121.445	147.887	93.2605	102.984	107.819	119.962	-0.37158	0.153228	-2.42501	0.0153079	0.0482603	995	ENSG00000158402	CDC25C	cell division cycle 25C	0.532198	1.08732e-06
339751	65.0562	60.7226	77.1585	48.1028	45.9928	46.9707	57.3339	-0.371271	0.18487	-2.00828	0.0446131	0.115444	339751	ENSG00000238133	MAP3K20-AS1	MAP3K20 antisense RNA 1	-0.0638552	NA
220963	72.6461	99.5851	61.0838	56.938	54.9914	52.3083	66.2588	-0.371168	0.18401	-2.01711	0.0436841	0.113559	220963	ENSG00000165449	SLC16A9	solute carrier family 16 member 9	-0.50661	0.000397565
55450	1105.95	1000.71	975.198	768.662	804.875	786.76	907.026	-0.370615	0.0751046	-4.93466	8.02917e-07	7.56592e-06	55450	ENSG00000162545	CAMK2N1	calcium/calmodulin dependent protein kinase II inhibitor 1	0.0305931	0.883849	YES
645687	34.6966	29.9565	28.9344	10.7986	22.9964	22.4178	24.9667	-0.370584	0.204664	-1.81069	0.070189	0.165528	645687	ENSG00000258791	LINC00520	long intergenic non-protein coding RNA 520	0.0481595	NA
3714	3220.28	3450.66	3348.89	2563.19	2725.58	2423.26	2955.31	-0.370568	0.0566561	-6.54066	6.1249e-11	1.05231e-09	3714	ENSG00000184916	JAG2	jagged canonical Notch ligand 2	-0.72228	5.36358e-07
5019	3250.64	2854.77	3023.11	2372.74	2178.66	2462.76	2690.45	-0.370322	0.0625459	-5.9208	3.20373e-09	4.46093e-08	5019	ENSG00000083720	OXCT1	3-oxoacid CoA-transferase 1	0.375914	1.69875e-07	YES
91298	1112.46	990.184	980.556	819.71	756.882	783.557	907.225	-0.370311	0.0765579	-4.83701	1.31806e-06	1.19239e-05	91298	ENSG00000133641	C12orf29	chromosome 12 open reading frame 29	0.111255	0.318466
3730	1928.92	1956.08	1907.53	1499.04	1398.78	1559.64	1708.33	-0.370068	0.0609078	-6.07587	1.23316e-09	1.8117e-08	3730	ENSG00000011201	ANOS1	anosmin 1	-1.66025	3.9532e-08
3552	1761.94	1928.55	1712.49	1565.79	1169.82	1399.51	1589.68	-0.370002	0.0831696	-4.44876	8.6368e-06	6.77178e-05	3552	ENSG00000115008	IL1A	interleukin 1 alpha	-1.36177	6.88643e-06
200845	158.303	173.262	168.248	107.986	140.978	121.697	145.079	-0.369861	0.144589	-2.55802	0.010527	0.0352706	200845	ENSG00000168301	KCTD6	potassium channel tetramerization domain containing 6	0.379282	0.0217548	YES
4436	2729.11	2541.44	2547.3	1959.45	2014.69	2045.36	2306.23	-0.36964	0.0555601	-6.65297	2.8723e-11	5.13226e-10	4436	ENSG00000095002	MSH2	mutS homolog 2	0.0874247	0.345429	YES
341056	21.6854	14.5734	16.0747	6.87182	9.99845	8.54013	12.9573	-0.369615	0.196954	-1.87665	0.0605654	0.147448	341056	NA	LOC341056	SUMO1 activating enzyme subunit 1 pseudogene	0.357549	0.296811
1140	830.55	793.442	857.317	647.915	625.903	625.565	730.115	-0.369559	0.0777567	-4.75276	2.00655e-06	1.77159e-05	1140	ENSG00000170175	CHRNB1	cholinergic receptor nicotinic beta 1 subunit	-0.168231	0.311925	YES	YES
730101	1141.74	1047.67	1143.45	871.74	863.866	818.785	981.207	-0.369377	0.0720898	-5.12384	2.99372e-07	3.05245e-06	730101	ENSG00000216775	LOC730101	uncharacterized LOC730101	0.391404	0.00288485
27341	2466.71	2326.89	2453	1750.35	2002.69	1820.12	2136.63	-0.369287	0.0616606	-5.98903	2.11093e-09	3.01551e-08	27341	ENSG00000189306	RRP7A	ribosomal RNA processing 7 homolog A	0.0551931	0.540968	YES
84159	4701.39	4326.69	4661.66	3622.43	3352.48	3574.05	4039.78	-0.368914	0.0529668	-6.965	3.28408e-12	6.60333e-11	84159	ENSG00000150347	ARID5B	AT-rich interaction domain 5B	0.0919432	0.63865	YES
25898	1232.81	1214.45	1244.18	986.597	849.868	997.06	1087.5	-0.368845	0.0735499	-5.0149	5.30621e-07	5.18328e-06	25898	ENSG00000163743	RCHY1	ring finger and CHY zinc finger domain containing 1	-0.417117	1.09078e-05	YES
283659	262.393	289.04	270.055	214.99	200.969	204.963	240.402	-0.368789	0.118025	-3.12467	0.00178006	0.00775867	283659	ENSG00000166450	PRTG	protogenin	0.219576	0.255692
471	3048.97	2802.15	2910.59	2165.61	2171.66	2409.38	2584.73	-0.368692	0.0592238	-6.2254	4.80333e-10	7.35768e-09	471	ENSG00000138363	ATIC	5-aminoimidazole-4-carboxamide ribonucleotide formyltransferase/IMP cyclohydrolase	-0.34456	0.000104081	YES
84279	611.528	576.46	556.184	445.687	476.926	407.791	512.429	-0.368631	0.0921293	-4.00124	6.30125e-05	0.000405715	84279	ENSG00000135617	PRADC1	protease associated domain containing 1	0.275153	0.130235
1528	699.354	722.194	729.791	517.35	587.909	542.298	633.149	-0.368441	0.0835491	-4.40987	1.03433e-05	7.95134e-05	1528	ENSG00000166347	CYB5A	cytochrome b5 type A	-0.583652	9.7575e-05	YES
1021	5773.73	5527.38	5371.09	4319.43	3765.41	4740.84	4916.31	-0.368435	0.0661602	-5.56883	2.56459e-08	3.13285e-07	1021	ENSG00000105810	CDK6	cyclin dependent kinase 6	-0.905382	2.39914e-08	YES
91942	719.955	651.756	631.199	465.321	577.91	483.585	588.288	-0.368434	0.094688	-3.89103	9.98186e-05	0.00061491	91942	ENSG00000164182	NDUFAF2	NADH:ubiquinone oxidoreductase complex assembly factor 2	0.203132	0.299699
23306	2146.85	2049.19	2048.99	1610.95	1537.76	1663.19	1842.82	-0.368055	0.058689	-6.27128	3.58082e-10	5.6205e-09	23306	ENSG00000166881	NEMP1	nuclear envelope integral membrane protein 1	0.0795935	0.506507
100287082	50.9607	31.5758	43.9375	28.469	22.9964	29.8905	34.6383	-0.368024	0.201404	-1.8273	0.0676552	0.160922	100287082	ENSG00000265962	GACAT2	gastric cancer associated transcript 2	-0.0415882	0.92843
6723	3424.12	3220.73	3272.81	2303.04	2712.58	2621.82	2925.85	-0.367981	0.0618122	-5.95321	2.62938e-09	3.7049e-08	6723	ENSG00000116649	SRM	spermidine synthase	-0.646887	5.06849e-08	YES
100996724	369.736	388.625	370.789	292.543	253.961	311.715	331.228	-0.367927	0.108089	-3.40392	0.00066426	0.00328218	100996724	NA	PDE4DIPP2	PDE4DIP pseudogene 2	-0.392944	0.0722192
800	35144.4	31172.6	32396.9	25908.7	24513.2	25782.7	29153.1	-0.367923	0.0485976	-7.5708	3.70936e-14	9.38871e-13	800	ENSG00000122786	CALD1	caldesmon 1	0.0698333	0.614787
411	2392.98	2462.1	2446.57	1877.97	1838.71	1917.26	2155.93	-0.36791	0.0539996	-6.81321	9.54467e-12	1.81535e-10	411	ENSG00000113273	ARSB	arylsulfatase B	-0.653891	1.16856e-05	YES
51389	1504.97	1369.9	1382.42	1077.89	1062.83	1133.7	1255.29	-0.367522	0.067254	-5.46469	4.63728e-08	5.43967e-07	51389	ENSG00000111832	RWDD1	RWD domain containing 1	0.236186	0.159157	YES
404550	484.668	484.162	449.02	323.957	400.938	355.483	416.371	-0.367311	0.101343	-3.62442	0.000289608	0.00157507	404550	ENSG00000154102	C16orf74	chromosome 16 open reading frame 74	-0.59452	0.000457581
51765	936.809	893.837	995.559	706.816	670.896	788.895	832.135	-0.367278	0.080824	-4.54417	5.51509e-06	4.51702e-05	51765	ENSG00000134602	STK26	serine/threonine kinase 26	0.431944	6.3622e-06	YES	YES
10365	195.169	203.218	201.469	147.253	165.974	135.575	174.776	-0.36714	0.133958	-2.7407	0.00613081	0.0225328	10365	ENSG00000127528	KLF2	Kruppel like factor 2	0.572197	0.00011262	YES	YES
1690	796.938	823.399	865.89	623.373	649.899	635.172	732.445	-0.367125	0.0777866	-4.71964	2.36262e-06	2.05631e-05	1690	ENSG00000100473	COCH	cochlin	-0.751937	9.50386e-16
8883	1848.68	1628.99	1747.85	1327.24	1250.81	1440.08	1540.61	-0.366899	0.0695777	-5.27323	1.34042e-07	1.44422e-06	8883	ENSG00000159593	NAE1	NEDD8 activating enzyme E1 subunit 1	0.281081	0.00984541	YES
51377	1831.33	1714.81	1726.42	1376.33	1375.79	1309.84	1555.75	-0.366718	0.0612755	-5.98474	2.1673e-09	3.08804e-08	51377	ENSG00000116750	UCHL5	ubiquitin C-terminal hydrolase L5	0.146312	0.123635	YES
124222	2147.94	2158.49	2081.14	1540.27	1778.72	1604.48	1885.17	-0.366667	0.0631235	-5.80872	6.29525e-09	8.43176e-08	124222	ENSG00000162073	PAQR4	progestin and adipoQ receptor family member 4	0.0156402	0.916012
5789	1293.53	1248.46	1228.11	1061.21	865.865	969.305	1111.08	-0.366384	0.0760827	-4.81559	1.46762e-06	1.3219e-05	5789	ENSG00000153707	PTPRD	protein tyrosine phosphatase receptor type D	-0.452965	0.00618897	YES
8817	35.7809	49.3877	30.0061	23.5605	22.9964	27.7554	31.5812	-0.36615	0.202728	-1.80612	0.0709001	0.16681	8817	ENSG00000156427	FGF18	fibroblast growth factor 18	-0.541187	0.0612323
2827	276.489	326.283	303.276	202.228	218.966	264.744	265.331	-0.366063	0.122217	-2.9952	0.00274267	0.0112848	2827	ENSG00000181773	GPR3	G protein-coupled receptor 3	-0.487469	0.0607554
5328	10036	11102.5	10322.1	8231.46	7941.76	8160.1	9298.99	-0.365989	0.0475318	-7.69988	1.36189e-14	3.62469e-13	5328	ENSG00000122861	PLAU	plasminogen activator, urokinase	-1.13	4.00086e-43
26784	18.4326	18.6216	40.7225	9.81689	20.9967	10.6752	19.8776	-0.365982	0.201579	-1.81558	0.0694347	0.164156	26784	ENSG00000207405	SNORA64	small nucleolar RNA, H/ACA box 64	0.295201	0.408809
60559	5511.34	5452.08	5676.51	4442.14	3937.39	4471.83	4915.21	-0.365975	0.0543578	-6.7327	1.66539e-11	3.0618e-10	60559	ENSG00000129128	SPCS3	signal peptidase complex subunit 3	-0.710241	1.01152e-10	YES
401474	822.961	779.679	890.538	650.86	600.907	659.725	734.111	-0.365742	0.0818401	-4.46898	7.85937e-06	6.21427e-05	401474	ENSG00000177570	SAMD12	sterile alpha motif domain containing 12	-0.469078	0.000801688
374462	8.67416	6.47708	5.35823	0.981689	0	0	3.58186	-0.365632	0.138011	-2.6493	0.00806591	NA	374462	ENSG00000139304	PTPRQ	protein tyrosine phosphatase receptor type Q	0.00287529	0.993558
9298	44.455	39.6721	48.2241	25.5239	28.9955	33.093	36.6606	-0.365468	0.198894	-1.8375	0.0661357	0.15819	9298	NA	SNORD31	small nucleolar RNA, C/D box 31	0.365304	0.167857
468	16320.4	16079.4	16438	12656.9	12746	12420.6	14443.5	-0.365294	0.0385229	-9.48251	2.48231e-21	1.19614e-19	468	ENSG00000128272	ATF4	activating transcription factor 4	0.13612	0.17561	YES	YES
282969	658.152	631.515	619.411	462.376	539.916	459.032	561.734	-0.365211	0.0901269	-4.05219	5.07412e-05	0.000335065	282969	ENSG00000148803	FUOM	fucose mutarotase	0.352169	0.0286205
55466	67.2247	79.3442	96.4481	52.0295	51.9919	68.3211	69.2266	-0.364665	0.181055	-2.01411	0.0439982	0.114286	55466	ENSG00000140403	DNAJA4	DnaJ heat shock protein family (Hsp40) member A4	-1.4123	4.47682e-06	YES	YES
23658	674.416	567.554	653.704	500.661	437.932	509.205	557.245	-0.364309	0.0945584	-3.85274	0.000116803	0.000708186	23658	ENSG00000106355	LSM5	LSM5 homolog, U6 small nuclear RNA and mRNA degradation associated	0.505832	0.000454185
100861519	164.809	220.221	202.541	151.18	158.975	129.17	171.149	-0.364284	0.141368	-2.57685	0.00997054	0.0337899	100861519	NA	GDNF-AS1	GDNF antisense RNA 1	0.924537	0.00349656
84898	188.663	208.076	197.183	151.18	143.978	151.587	173.444	-0.36405	0.132544	-2.74663	0.00602115	0.0221989	84898	ENSG00000120594	PLXDC2	plexin domain containing 2	-2.828	5.76223e-23	YES	YES
79731	466.236	449.347	400.796	346.536	325.949	333.065	386.988	-0.363919	0.100879	-3.60749	0.000309168	0.00166556	79731	ENSG00000137513	NARS2	asparaginyl-tRNA synthetase 2, mitochondrial	0.105992	0.370085	YES	YES
105376544	41.2022	36.4336	32.1494	30.4324	19.9969	19.2153	29.905	-0.363917	0.203228	-1.79068	0.0733439	0.171291	105376544	NA	LOC105376544	uncharacterized LOC105376544	-0.783039	0.016153
150465	3559.66	3381.04	3719.68	2878.31	2596.6	2762.73	3149.67	-0.363902	0.0567717	-6.40992	1.45595e-10	2.40159e-09	150465	ENSG00000114999	TTL	tubulin tyrosine ligase	-0.544046	3.53005e-13	YES
8324	1919.16	1858.92	1796.08	1361.6	1481.77	1463.57	1646.85	-0.36369	0.0615938	-5.90466	3.53382e-09	4.90815e-08	8324	ENSG00000155760	FZD7	frizzled class receptor 7	-0.295568	0.0182494	YES
6001	533.461	486.591	559.399	367.152	448.93	388.576	464.018	-0.363672	0.0997851	-3.64455	0.000267861	0.00147181	6001	ENSG00000148908	RGS10	regulator of G protein signaling 10	0.616451	6.5026e-06
25874	3024.03	3094.42	3209.58	2305.99	2668.58	2225.77	2754.73	-0.363667	0.0645876	-5.63059	1.79593e-08	2.24023e-07	25874	ENSG00000143158	MPC2	mitochondrial pyruvate carrier 2	0.595505	1.10451e-06	YES
55117	95.4157	104.443	100.735	62.8281	77.9879	77.9287	86.5563	-0.363653	0.167374	-2.17269	0.0298033	0.0834472	55117	ENSG00000072041	SLC6A15	solute carrier family 6 member 15	-0.473419	1.22075e-05
7643	23.8539	21.0505	19.2896	4.90845	8.9986	19.2153	16.2194	-0.363606	0.198974	-1.8274	0.067639	0.160922	7643	ENSG00000213988	ZNF90	zinc finger protein 90	1.16089	0.00021796
100507588	170.23	204.838	199.326	123.693	166.974	138.777	167.306	-0.363458	0.141786	-2.56343	0.0103643	0.0348384	100507588	ENSG00000260001	TGFBR3L	transforming growth factor beta receptor 3 like	-0.394963	0.198677
5625	4.33708	8.09635	25.7195	4.90845	3.99938	2.13503	8.1993	-0.363221	0.169817	-2.1389	0.0324442	0.0893579	5625	ENSG00000100033	PRODH	proline dehydrogenase 1	-0.0113481	NA
677822	82.4045	85.8213	83.5884	57.9197	55.9913	67.2535	72.1631	-0.363219	0.174619	-2.08006	0.0375196	0.10036	677822	ENSG00000210825	SNORA40	small nucleolar RNA, H/ACA box 40	0.582805	0.00607227
152687	307.933	273.657	270.055	214.99	205.968	224.178	249.463	-0.363174	0.117717	-3.08515	0.00203447	0.00870007	152687	ENSG00000272602	ZNF595	zinc finger protein 595	-0.0108723	0.957869
283078	558.399	550.552	588.334	404.456	438.932	457.965	499.773	-0.363081	0.0909926	-3.99022	6.60106e-05	0.000423255	283078	ENSG00000150051	MKX	mohawk homeobox	-0.620758	4.44125e-08
705	1525.57	1475.15	1522.81	1091.64	1261.8	1136.91	1335.65	-0.362819	0.0681712	-5.32217	1.02534e-07	1.12829e-06	705	ENSG00000112578	BYSL	bystin like	-0.265721	0.0153007	YES
117248	84.573	75.2961	81.4451	62.8281	45.9928	62.9835	68.8531	-0.362649	0.178803	-2.02821	0.0425392	0.111231	117248	ENSG00000131386	GALNT15	polypeptide N-acetylgalactosaminyltransferase 15	0.756097	0.00411693
81832	317.691	344.905	253.98	252.294	189.97	249.799	268.106	-0.362647	0.130204	-2.78523	0.00534902	0.0201524	81832	ENSG00000166342	NETO1	neuropilin and tolloid like 1	-0.0113522	NA
7371	4278.53	4185.81	4473.05	3394.68	3380.47	3244.18	3826.12	-0.362618	0.0496143	-7.30875	2.69646e-13	6.17273e-12	7371	ENSG00000143179	UCK2	uridine-cytidine kinase 2	-0.207924	0.0297542	YES
6510	12708.7	13030.3	13264.8	9300.52	10594.4	10326.1	11537.5	-0.362403	0.0507833	-7.13626	9.59058e-13	2.03744e-11	6510	ENSG00000105281	SLC1A5	solute carrier family 1 member 5	-0.312167	0.000726441
55775	1223.06	1150.49	1218.46	918.861	922.856	929.807	1060.59	-0.362363	0.0678335	-5.34195	9.19499e-08	1.01723e-06	55775	ENSG00000042088	TDP1	tyrosyl-DNA phosphodiesterase 1	-0.378637	0.00023227	YES
192668	293.837	301.994	324.709	214.008	237.963	247.664	270.029	-0.362232	0.114716	-3.15765	0.00159046	0.00705233	192668	ENSG00000205795	CYS1	cystin 1	-0.319063	0.0731995	YES
9200	576.831	543.265	579.76	422.126	474.926	404.589	500.25	-0.362187	0.0928236	-3.90188	9.54481e-05	0.000590186	9200	ENSG00000165996	HACD1	3-hydroxyacyl-CoA dehydratase 1	0.849839	2.80973e-16
57608	4777.29	4906.39	4882.42	3857.06	3669.43	3769.4	4310.33	-0.362173	0.0465243	-7.7846	6.9933e-15	1.9208e-13	57608	ENSG00000165757	JCAD	junctional cadherin 5 associated	-0.274697	0.0953753	YES
2859	150.713	133.59	133.956	123.693	74.9883	107.819	120.793	-0.361588	0.160797	-2.24872	0.0245302	0.0714045	2859	ENSG00000178623	GPR35	G protein-coupled receptor 35	0.0538065	0.909785
55132	712.365	774.821	692.283	562.508	537.916	579.661	643.259	-0.361523	0.0836819	-4.3202	1.5589e-05	0.000116008	55132	ENSG00000138709	LARP1B	La ribonucleoprotein 1B	-0.099166	0.422039
84549	665.741	638.802	686.925	506.552	442.931	577.526	586.413	-0.361487	0.0946515	-3.81914	0.000133918	0.000797045	84549	ENSG00000198042	MAK16	MAK16 homolog	-0.119669	0.28157	YES
101928099	7.58989	8.09635	10.7165	0.981689	2.99953	2.13503	5.41982	-0.361479	0.161382	-2.23989	0.0250978	0.0727109	101928099	NA	PCAT7	prostate cancer associated transcript 7	-0.224885	0.483851
5892	1481.11	1341.57	1387.78	1055.32	1093.83	1103.81	1243.9	-0.361009	0.0666585	-5.4158	6.10155e-08	6.99836e-07	5892	ENSG00000185379	RAD51D	RAD51 paralog D	-0.0351013	0.839952	YES
339983	84.573	78.5346	56.7972	49.0845	59.9907	45.9032	62.4805	-0.360919	0.185067	-1.95021	0.0511513	0.128778	339983	ENSG00000185818	NAT8L	N-acetyltransferase 8 like	0.188409	0.603075
9853	5823.61	5667.45	5768.67	4218.32	4697.27	4471.83	5107.86	-0.360867	0.0499644	-7.22249	5.10457e-13	1.12491e-11	9853	ENSG00000198853	RUSC2	RUN and SH3 domain containing 2	-0.385934	0.00320244	YES	YES
2560	7.58989	16.1927	9.64481	4.90845	1.99969	4.27007	7.43427	-0.360479	0.174655	-2.06394	0.0390232	0.103477	2560	ENSG00000163288	GABRB1	gamma-aminobutyric acid type A receptor subunit beta1	-0.135235	0.696275	YES	YES
203328	42.2865	50.1974	42.8658	26.5056	26.9958	37.3631	37.7024	-0.360438	0.198763	-1.81341	0.0697685	0.164741	203328	ENSG00000157303	SUSD3	sushi domain containing 3	-0.746033	0.00120976
2303	686.343	778.869	581.904	472.192	572.911	525.218	602.906	-0.360178	0.102115	-3.5272	0.000419983	0.00218148	2303	ENSG00000176692	FOXC2	forkhead box C2	-1.06279	1.94625e-07	YES	YES
57405	23.8539	10.5253	15.003	11.7803	2.99953	6.4051	11.7612	-0.360156	0.188991	-1.90567	0.0566927	0.139541	57405	ENSG00000152253	SPC25	SPC25 component of NDC80 kinetochore complex	-0.0460788	0.891119
5924	3083.66	3057.18	3074.55	2448.33	2316.64	2385.9	2727.71	-0.35999	0.0510647	-7.04969	1.79317e-12	3.70932e-11	5924	ENSG00000113319	RASGRF2	Ras protein specific guanine nucleotide releasing factor 2	-1.02932	2.00937e-13
6713	2501.41	2575.45	2554.8	1976.14	1967.69	1979.18	2259.11	-0.359855	0.0526573	-6.8339	8.26341e-12	1.58627e-10	6713	ENSG00000104549	SQLE	squalene epoxidase	-0.500718	1.60159e-07	YES
4017	41640.3	46593.7	45159.2	33979.2	35450.5	34184	39501.1	-0.35977	0.046594	-7.72139	1.15067e-14	3.09743e-13	4017	ENSG00000134013	LOXL2	lysyl oxidase like 2	-0.352563	0.00124395	YES	YES
29887	1072.34	989.374	937.69	860.941	665.896	780.355	884.433	-0.359754	0.0880036	-4.08794	4.35214e-05	0.000292162	29887	ENSG00000086300	SNX10	sorting nexin 10	0.140085	0.315373
55286	354.556	385.386	382.578	299.415	266.958	292.5	330.232	-0.359682	0.10579	-3.39996	0.000673952	0.00332411	55286	ENSG00000154274	C4orf19	chromosome 4 open reading frame 19	-1.33597	7.54845e-08
54491	1061.5	955.369	998.774	801.058	765.881	760.072	890.442	-0.359392	0.0742802	-4.83833	1.30937e-06	1.18648e-05	54491	ENSG00000145569	OTULINL	OTU deubiquitinase with linear linkage specificity like	0.363787	0.000401109
23643	43.3708	38.0528	69.657	19.6338	39.9938	38.4306	41.5231	-0.359272	0.201873	-1.7797	0.0751257	0.174491	23643	ENSG00000154589	LY96	lymphocyte antigen 96	-0.449191	0.209291
22998	4601.64	4457.85	4470.91	3586.11	3263.49	3654.11	4005.68	-0.359062	0.0530067	-6.7739	1.25359e-11	2.33852e-10	22998	ENSG00000064042	LIMCH1	LIM and calponin homology domains 1	-0.398345	0.0119867
51388	1371.6	1322.13	1483.16	1081.82	1100.83	1047.23	1234.46	-0.358877	0.0679814	-5.27904	1.29861e-07	1.4056e-06	51388	ENSG00000132603	NIP7	nucleolar pre-rRNA processing protein NIP7	-0.242003	0.0173324	YES
5330	15.1798	12.9542	19.2896	7.85351	5.99907	8.54013	11.636	-0.358836	0.194041	-1.84928	0.0644169	0.154818	5330	ENSG00000137841	PLCB2	phospholipase C beta 2	0.356054	0.338388
883	391.421	393.483	368.646	288.617	307.952	287.162	339.547	-0.358704	0.103378	-3.46983	0.000520791	0.00264362	883	ENSG00000171097	KYAT1	kynurenine aminotransferase 1	0.210128	0.315231
54913	282.994	299.565	291.488	235.605	215.966	214.571	256.698	-0.358577	0.114992	-3.11827	0.00181916	0.00789368	54913	ENSG00000178718	RPP25	ribonuclease P and MRP subunit p25	-1.62307	1.1965e-10
84920	208.18	230.746	220.759	190.448	153.976	153.722	192.972	-0.358156	0.131859	-2.71621	0.00660334	0.0239342	84920	ENSG00000139133	ALG10	ALG10 alpha-1,2-glucosyltransferase	-0.195207	0.355089	YES
29980	2026.5	1923.69	1935.39	1551.07	1490.77	1525.48	1742.15	-0.357723	0.0581673	-6.1499	7.75334e-10	1.16075e-08	29980	ENSG00000159147	DONSON	DNA replication fork stabilization factor DONSON	0.197618	0.0533378
54841	477.079	482.542	434.017	350.463	337.947	383.238	410.881	-0.357512	0.098862	-3.61627	0.000298875	0.00161855	54841	ENSG00000134897	BIVM	basic, immunoglobulin-like variable motif containing	0.315786	0.0303718	YES
339416	79.1517	63.1515	81.4451	59.883	44.993	53.3758	63.6667	-0.357266	0.182655	-1.95597	0.0504692	0.12741	339416	ENSG00000183831	ANKRD45	ankyrin repeat domain 45	-0.307901	0.349861
57829	55.2977	67.1997	38.5792	27.4873	35.9944	45.9032	45.0769	-0.35724	0.198005	-1.8042	0.0712001	0.167379	57829	ENSG00000116996	ZP4	zona pellucida glycoprotein 4	NA	NA
3037	1631.83	1623.32	1608.54	1281.1	1119.83	1367.49	1438.68	-0.357118	0.0712413	-5.01279	5.36464e-07	5.23656e-06	3037	ENSG00000170961	HAS2	hyaluronan synthase 2	-2.06496	2.00314e-28
7023	210.348	250.177	256.123	169.832	203.968	168.668	209.853	-0.357116	0.130123	-2.74445	0.00606122	0.0223167	7023	ENSG00000090447	TFAP4	transcription factor AP-4	-0.0543603	0.781513
283551	341.545	341.666	327.924	265.056	271.958	235.921	297.345	-0.35677	0.109851	-3.24776	0.00116316	0.00536851	283551	ENSG00000214900	LINC01588	long intergenic non-protein coding RNA 1588	-0.312521	0.296598
134266	1236.07	1228.22	1231.32	952.238	905.859	1007.74	1093.57	-0.356667	0.0685247	-5.20494	1.94055e-07	2.04029e-06	134266	ENSG00000164284	GRPEL2	GrpE like 2, mitochondrial	-0.415453	0.0321488	YES
51018	1005.12	901.124	941.977	712.706	731.886	757.937	841.791	-0.35639	0.0759351	-4.69335	2.68766e-06	2.31846e-05	51018	ENSG00000067533	RRP15	ribosomal RNA processing 15 homolog	-0.22451	0.0840711	YES
9159	5149.2	4717.74	4769.9	3744.16	3752.42	3890.03	4337.24	-0.356275	0.0506075	-7.03995	1.92306e-12	3.96314e-11	9159	ENSG00000160613	PCSK7	proprotein convertase subtilisin/kexin type 7	0.0848773	0.406456
4833	1437.74	1484.87	1418.86	1045.5	1236.81	1083.53	1284.55	-0.356182	0.0713705	-4.99061	6.01897e-07	5.81084e-06	4833	ENSG00000103202	NME4	NME/NM23 nucleoside diphosphate kinase 4	0.134271	0.342375
23463	9683.61	9227.41	9353.32	7156.51	7532.83	7327.43	8380.19	-0.356064	0.0435184	-8.18192	2.79346e-16	8.55006e-15	23463	ENSG00000116237	ICMT	isoprenylcysteine carboxyl methyltransferase	-0.0556929	0.629025	YES
56098	107.343	118.207	117.881	88.352	70.989	93.9415	99.4521	-0.355876	0.162028	-2.19639	0.0280641	0.0795888	56098	ENSG00000242419	PCDHGC4	protocadherin gamma subfamily C, 4	-0.502046	0.14066
161159	17.3483	14.5734	16.0747	6.87182	8.9986	7.47262	11.8899	-0.355671	0.195305	-1.8211	0.0685915	0.162651	161159	ENSG00000259062	ACTN1-AS1	ACTN1 antisense RNA 1	-0.406107	0.260108
28989	1133.06	1150.49	1099.51	840.326	916.857	867.891	1001.36	-0.355503	0.0702098	-5.06344	4.11752e-07	4.09099e-06	28989	ENSG00000148335	NTMT1	N-terminal Xaa-Pro-Lys N-methyltransferase 1	-0.228765	0.0573485	YES
134285	99.7528	122.255	129.669	74.6084	97.9848	86.4688	101.79	-0.355226	0.163289	-2.17544	0.0295969	0.0830318	134285	ENSG00000157111	TMEM171	transmembrane protein 171	-0.673585	0.0113816
153443	635.382	638.802	713.716	552.691	495.923	483.585	586.683	-0.355138	0.0892046	-3.98116	6.85786e-05	0.000437463	153443	ENSG00000151304	SRFBP1	serum response factor binding protein 1	-0.0221568	0.883849	YES
79863	984.517	842.02	894.824	653.805	725.887	722.709	803.96	-0.355094	0.0819269	-4.33428	1.4624e-05	0.000109221	79863	ENSG00000101546	RBFA	ribosome binding factor A	0.0736147	0.604365	YES
4489	19.5169	17.812	16.0747	8.8352	11.9981	6.4051	13.4403	-0.355004	0.19796	-1.79331	0.0729231	0.170598	4489	ENSG00000205362	MT1A	metallothionein 1A	-0.08262	0.831025
388796	576.831	599.94	618.34	451.577	494.923	438.749	530.06	-0.354977	0.0891201	-3.98313	6.80141e-05	0.000434533	388796	ENSG00000196756	SNHG17	small nucleolar RNA host gene 17	-0.098916	0.610957
91408	1902.89	1745.57	1765	1434.25	1354.79	1416.59	1603.18	-0.354797	0.0621508	-5.70865	1.13877e-08	1.47389e-07	91408	ENSG00000134717	BTF3L4	basic transcription factor 3 like 4	-0.139192	0.123959	YES
399474	1579.78	1689.71	1683.56	1243.8	1362.79	1244.72	1467.39	-0.354111	0.0647332	-5.47031	4.49244e-08	5.28477e-07	399474	ENSG00000253304	TMEM200B	transmembrane protein 200B	-0.220338	0.0574522
26056	5877.82	6096.55	6097.66	4519.7	5008.22	4557.23	5359.53	-0.354009	0.0509221	-6.95197	3.60232e-12	7.19941e-11	26056	ENSG00000135631	RAB11FIP5	RAB11 family interacting protein 5	-0.227306	0.0726442	YES
9446	5536.28	5896.57	5905.84	4456.87	4772.26	4281.81	5141.6	-0.353971	0.0523124	-6.7665	1.31938e-11	2.45848e-10	9446	ENSG00000148834	GSTO1	glutathione S-transferase omega 1	0.482932	0.000825925
2151	560.567	480.923	537.966	397.584	378.941	438.749	465.789	-0.353305	0.0975532	-3.62167	0.000292709	0.00159089	2151	ENSG00000164220	F2RL2	coagulation factor II thrombin receptor like 2	0.454853	0.000306984	YES
55437	1309.8	1126.2	1243.11	944.385	918.857	989.588	1088.66	-0.352835	0.0737541	-4.78393	1.71899e-06	1.53575e-05	55437	ENSG00000082146	STRADB	STE20 related adaptor beta	0.347768	0.0001094	YES
51337	1141.74	1199.88	1104.87	854.069	973.849	849.743	1020.69	-0.352387	0.0749115	-4.70404	2.55058e-06	2.21059e-05	51337	ENSG00000130193	THEM6	thioesterase superfamily member 6	0.0273766	0.860249
10769	12967.9	13145.2	13382.7	10202.7	10444.4	10218.3	11726.9	-0.352325	0.0396435	-8.88733	6.25934e-19	2.49288e-17	10769	ENSG00000145632	PLK2	polo like kinase 2	-0.0314784	0.727547	YES
9754	573.579	582.128	558.327	400.529	456.929	468.64	506.689	-0.351999	0.0917942	-3.83466	0.000125739	0.000754342	9754	ENSG00000130052	STARD8	StAR related lipid transfer domain containing 8	-0.190835	0.22518	YES
55024	311.185	303.613	305.419	216.953	241.962	246.596	270.955	-0.351698	0.113134	-3.10868	0.00187928	0.00812469	55024	ENSG00000153064	BANK1	B cell scaffold protein with ankyrin repeats 1	-1.04114	5.71343e-11
389668	112.764	97.9658	102.878	88.352	69.9891	71.5236	90.5788	-0.351556	0.166131	-2.11613	0.0343337	0.0935643	389668	ENSG00000221947	XKR9	XK related 9	0.511234	0.0250834
503542	1128.72	1217.69	1129.51	855.051	953.852	896.714	1030.26	-0.351348	0.0721845	-4.86736	1.13097e-06	1.03389e-05	503542	ENSG00000203772	SPRN	shadow of prion protein	0.276795	0.32872
90871	1676.28	1556.12	1629.97	1256.56	1324.79	1202.02	1440.96	-0.351341	0.0645817	-5.44026	5.32015e-08	6.17063e-07	90871	ENSG00000137038	DMAC1	distal membrane arm assembly complex 1	0.277206	0.0995074	YES
23464	561.652	561.077	560.471	416.236	481.925	402.454	497.302	-0.350908	0.0934552	-3.75482	0.000173464	0.00100035	23464	ENSG00000100116	GCAT	glycine C-acetyltransferase	0.177895	0.233057
8743	3819.88	4173.67	3833.28	3493.83	2811.56	2901.51	3505.62	-0.350653	0.0699629	-5.01199	5.38698e-07	5.25286e-06	8743	ENSG00000121858	TNFSF10	TNF superfamily member 10	-0.915856	5.04561e-13
90768	451.056	476.875	455.449	322.976	381.941	364.023	408.72	-0.350344	0.0992634	-3.52943	0.000416449	0.00216585	90768	NA	TENM3-AS1	TENM3 antisense RNA 1	-0.540363	1.86237e-06
51097	2537.19	2225.69	2514.08	1846.56	1968.69	1852.14	2157.39	-0.350337	0.0630071	-5.56027	2.69351e-08	3.27341e-07	51097	ENSG00000143653	SCCPDH	saccharopine dehydrogenase (putative)	0.293163	0.00276612	YES
50628	2649.95	2541.44	2735.91	2057.62	2042.68	2088.06	2352.61	-0.350093	0.0543583	-6.44048	1.19099e-10	1.98835e-09	50628	ENSG00000179409	GEMIN4	gem nuclear organelle associated protein 4	-0.388564	1.5441e-06
5723	1552.67	1448.44	1492.8	1146.61	1156.82	1198.82	1332.69	-0.350051	0.0636661	-5.49823	3.83623e-08	4.54843e-07	5723	ENSG00000146733	PSPH	phosphoserine phosphatase	-0.0680909	0.721504	YES
54475	1381.36	1299.46	1439.22	1037.65	1105.83	1063.25	1221.13	-0.349953	0.0676711	-5.17139	2.32362e-07	2.40782e-06	54475	ENSG00000073536	NLE1	notchless homolog 1	-0.187477	0.0688094
79922	119.27	38.8625	25.7195	26.5056	17.9972	25.6204	42.3291	-0.349934	0.179748	-1.9468	0.0515581	0.129585	79922	ENSG00000278619	MRM1	mitochondrial rRNA methyltransferase 1	-0.777938	0.0174173	YES
100302401	75.8989	54.2455	58.9405	53.0112	26.9958	50.1733	53.2109	-0.349921	0.194463	-1.79942	0.0719525	0.168757	100302401	ENSG00000224687	RASAL2-AS1	RASAL2 antisense RNA 1	-0.425524	0.119742
11113	851.152	923.794	904.469	731.358	637.901	714.169	793.807	-0.349856	0.079585	-4.39601	1.1026e-05	8.43696e-05	11113	ENSG00000122966	CIT	citron rho-interacting serine/threonine kinase	-0.351638	0.0373334
9811	1533.16	1590.12	1659.98	1219.26	1303.8	1206.29	1418.77	-0.349761	0.0643148	-5.43827	5.38003e-08	6.21826e-07	9811	ENSG00000134030	CTIF	cap binding complex dependent translation initiation factor	-0.0818609	0.593696	YES
4880	10.8427	19.4312	16.0747	6.87182	7.99876	7.47262	11.4486	-0.34971	0.193288	-1.80927	0.0704093	0.165962	4880	ENSG00000163273	NPPC	natriuretic peptide C	0.686778	0.0248845
2028	144.208	165.166	165.033	109.949	111.983	135.575	138.652	-0.349698	0.146592	-2.38552	0.0170549	0.0526591	2028	ENSG00000138792	ENPEP	glutamyl aminopeptidase	-1.37783	2.46908e-08	YES	YES
57486	1469.19	1307.56	1419.93	1071.02	1037.84	1157.19	1243.79	-0.349484	0.0705284	-4.95522	7.22499e-07	6.87872e-06	57486	ENSG00000123213	NLN	neurolysin	0.0701827	0.559481
7027	7147.5	6719.16	6938.91	5449.36	5422.16	5405.9	6180.5	-0.349449	0.0444064	-7.86933	3.56543e-15	9.97113e-14	7027	ENSG00000198176	TFDP1	transcription factor Dp-1	-0.326292	0.00155724
9940	13.0112	12.9542	19.2896	6.87182	6.99891	7.47262	11.0997	-0.349433	0.192685	-1.81349	0.0697561	0.164741	9940	ENSG00000008226	DLEC1	DLEC1 cilia and flagella associated protein	0.0343776	NA
27286	331.786	323.854	313.992	253.276	247.961	244.461	285.889	-0.349246	0.109482	-3.19	0.00142274	0.00641612	27286	ENSG00000102359	SRPX2	sushi repeat containing protein X-linked 2	-0.135788	0.720139
5198	2625.02	2719.56	2798.07	2028.17	2231.65	2101.94	2417.4	-0.34918	0.0567431	-6.1537	7.56982e-10	1.13637e-08	5198	ENSG00000178921	PFAS	phosphoribosylformylglycinamidine synthase	-0.339603	0.00024975	YES
84306	184.326	165.166	187.538	129.583	130.98	145.182	157.129	-0.348953	0.138618	-2.51737	0.0118234	0.0389509	84306	ENSG00000126249	PDCD2L	programmed cell death 2 like	-0.0972263	0.655485	YES
57126	54.2135	42.9107	41.7942	34.3591	32.9949	26.6879	38.8267	-0.348879	0.19791	-1.76281	0.0779318	0.17972	57126	ENSG00000204936	CD177	CD177 molecule	0.345961	0.352457
605	992.107	969.133	916.257	793.205	735.886	709.899	852.748	-0.348673	0.0760844	-4.58272	4.58967e-06	3.81005e-05	605	ENSG00000110987	BCL7A	BAF chromatin remodeling complex subunit BCL7A	-0.0478733	0.778402	YES
192111	3517.37	3249.87	3332.82	2442.44	2906.55	2531.08	2996.69	-0.348597	0.0639928	-5.44744	5.11e-08	5.95194e-07	192111	ENSG00000247077	PGAM5	PGAM family member 5, mitochondrial serine/threonine protein phosphatase	-0.328863	0.000141125	YES
101927746	11.927	8.90599	13.9314	2.94507	1.99969	7.47262	7.86362	-0.348249	0.1765	-1.97309	0.0484858	0.123345	101927746	NA	EMSLR	E2F1 mRNA stabilizing lncRNA	-0.530448	0.0893662
29088	1656.76	1637.08	1772.5	1253.62	1409.78	1288.49	1503.04	-0.348061	0.0660879	-5.26664	1.38947e-07	1.49513e-06	29088	ENSG00000137547	MRPL15	mitochondrial ribosomal protein L15	0.183669	0.118283	YES
92345	571.41	619.371	663.349	484.954	485.924	467.572	548.763	-0.347961	0.0888951	-3.91428	9.06732e-05	0.000563613	92345	ENSG00000145414	NAF1	nuclear assembly factor 1 ribonucleoprotein	-0.48514	1.2782e-05	YES
84798	5140.52	4899.91	5104.25	3816.81	4200.35	3831.32	4498.86	-0.347877	0.0518209	-6.71307	1.90569e-11	3.48806e-10	84798	ENSG00000167747	C19orf48	chromosome 19 open reading frame 48	0.0477306	0.706322
51764	14.0955	16.1927	38.5792	10.7986	15.9975	9.60765	17.5452	-0.347771	0.199478	-1.7434	0.0812636	0.185771	51764	ENSG00000127588	GNG13	G protein subunit gamma 13	-0.0113481	NA
2617	9138.22	8272.85	8833.58	6791.32	6632.97	7122.47	7798.57	-0.347494	0.0496779	-6.99495	2.65351e-12	5.38384e-11	2617	ENSG00000106105	GARS1	glycyl-tRNA synthetase 1	-0.0846742	0.367449
103695363	11.927	18.6216	15.003	4.90845	10.9983	5.33758	11.1327	-0.347172	0.191084	-1.81686	0.0692392	0.163882	103695363	NA	FOXG1-AS1	FOXG1 antisense RNA 1	-0.6421	0.0131947
151473	40.118	51.8166	62.1555	27.4873	47.9925	28.8229	43.0655	-0.347127	0.19886	-1.74558	0.0808833	0.185277	151473	ENSG00000163053	SLC16A14	solute carrier family 16 member 14	-0.666948	0.001705
54566	781.758	718.956	736.221	592.94	555.914	590.337	662.688	-0.346997	0.0813344	-4.26631	1.98736e-05	0.000144893	54566	ENSG00000095203	EPB41L4B	erythrocyte membrane protein band 4.1 like 4B	-0.546977	0.00153543
2628	53.1292	42.9107	49.2957	33.3774	29.9953	36.2956	40.834	-0.346861	0.196071	-1.76906	0.0768837	0.17775	2628	ENSG00000171766	GATM	glycine amidinotransferase	-0.423228	0.111154	YES
6505	1069.09	1071.96	1006.28	805.967	793.877	857.216	934.063	-0.346807	0.0722394	-4.8008	1.5803e-06	1.41906e-05	6505	ENSG00000106688	SLC1A1	solute carrier family 1 member 1	-0.515085	0.00405858
256714	1069.09	1089.77	1070.57	799.095	952.852	761.139	957.086	-0.346659	0.0813525	-4.2612	2.03332e-05	0.000147982	256714	ENSG00000184368	MAP7D2	MAP7 domain containing 2	0.175504	0.233304
100134868	61.8034	60.7226	80.3734	49.0845	43.9932	51.2408	57.8696	-0.346507	0.185613	-1.86683	0.0619256	0.15003	100134868	NA	LOC100134868	uncharacterized LOC100134868	0.184569	0.58959
7226	95.4157	76.9153	72.8719	57.9197	64.9899	54.4433	70.426	-0.346494	0.177766	-1.94916	0.0512767	0.128987	7226	ENSG00000142185	TRPM2	transient receptor potential cation channel subfamily M member 2	-0.762022	0.000297029
51192	364.315	305.232	274.341	272.91	208.968	239.124	277.481	-0.34648	0.125438	-2.76216	0.00574196	0.0213746	51192	ENSG00000217555	CKLF	chemokine like factor	0.0728507	0.837478
516	2100.23	1992.51	2055.42	1528.49	1722.73	1555.37	1825.79	-0.345979	0.0623297	-5.55078	2.84395e-08	3.44105e-07	516	ENSG00000159199	ATP5MC1	ATP synthase membrane subunit c locus 1	0.177086	0.291715	YES
10516	98.6685	88.2502	101.806	79.5168	70.989	60.8484	83.3465	-0.345949	0.169866	-2.0366	0.0416899	0.10946	10516	ENSG00000140092	FBLN5	fibulin 5	-0.162073	NA
54205	4738.26	4580.91	4628.44	3732.38	3559.45	3644.5	4147.32	-0.345911	0.0469539	-7.36703	1.74475e-13	4.09619e-12	54205	ENSG00000172115	CYCS	cytochrome c, somatic	0.214493	0.129867	YES
6422	41.2022	43.7203	38.5792	24.5422	31.995	26.6879	34.4545	-0.345724	0.200054	-1.72815	0.0839606	0.19054	6422	ENSG00000104332	SFRP1	secreted frizzled related protein 1	-0.198011	NA
10625	5514.59	5336.3	5298.22	4289	4059.37	4318.1	4802.6	-0.345626	0.0473635	-7.29731	2.9358e-13	6.66524e-12	10625	ENSG00000116679	IVNS1ABP	influenza virus NS1A binding protein	-0.043474	0.72436	YES
3146	8061.54	7375.77	7787.65	6125.74	6012.07	6075.24	6906.33	-0.345602	0.0465353	-7.42667	1.11365e-13	2.67146e-12	3146	ENSG00000189403	HMGB1	high mobility group box 1	0.290956	0.00650486	YES
127707	555.146	539.217	602.265	402.492	465.928	447.289	502.056	-0.345583	0.0933104	-3.70359	0.000212572	0.00120239	127707	ENSG00000179023	KLHDC7A	kelch domain containing 7A	-0.0400231	0.918817	YES
79693	696.101	629.896	635.486	519.313	491.923	513.475	581.033	-0.345386	0.0857559	-4.02755	5.63601e-05	0.000367029	79693	ENSG00000196449	YRDC	yrdC N6-threonylcarbamoyltransferase domain containing	-0.509841	0.000239765	YES
201931	1226.31	1188.54	1152.02	854.069	990.846	940.482	1058.71	-0.345288	0.072954	-4.73295	2.21277e-06	1.9402e-05	201931	ENSG00000170088	TMEM192	transmembrane protein 192	-0.397745	0.000124524
79666	946.567	857.403	917.329	718.596	676.895	724.844	806.939	-0.345245	0.0768773	-4.49085	7.09391e-06	5.6669e-05	79666	ENSG00000175895	PLEKHF2	pleckstrin homology and FYVE domain containing 2	0.120683	0.438508	YES
10436	1808.56	1833.01	1941.82	1402.83	1501.77	1465.7	1658.95	-0.345197	0.0608531	-5.67263	1.40619e-08	1.79056e-07	10436	ENSG00000126749	EMG1	EMG1 N1-specific pseudouridine methyltransferase	0.341522	0.0251557	YES
7503	10.8427	10.5253	5.35823	3.92676	1.99969	0	5.4421	-0.344455	0.157221	-2.19089	0.0284595	0.0804753	7503	ENSG00000229807	XIST	X inactive specific transcript	-1.4908	5.94573e-07
83990	1386.78	1230.65	1247.4	1038.63	890.861	1084.6	1146.48	-0.344238	0.0790099	-4.35689	1.31921e-05	9.94248e-05	83990	ENSG00000136492	BRIP1	BRCA1 interacting protein C-terminal helicase 1	0.117896	0.26642
140766	1863.86	2216.78	1966.47	1598.19	1628.75	1508.4	1797.07	-0.344099	0.0686703	-5.01088	5.41814e-07	5.28013e-06	140766	ENSG00000138316	ADAMTS14	ADAM metallopeptidase with thrombospondin type 1 motif 14	0.0542584	0.902732
50507	107.343	106.062	94.3048	82.4619	72.9886	72.5911	89.2919	-0.344079	0.165179	-2.08307	0.0372449	0.0997865	50507	ENSG00000086991	NOX4	NADPH oxidase 4	-1.3531	1.03154e-08
166815	405.517	341.666	379.363	295.488	285.956	287.162	332.525	-0.344009	0.107017	-3.21452	0.00130661	0.00594429	166815	ENSG00000180346	TIGD2	tigger transposable element derived 2	-0.46296	0.00106686
10036	3605.2	3731.61	3733.61	2844.93	3100.52	2739.25	3292.52	-0.343594	0.0553474	-6.20796	5.36781e-10	8.19956e-09	10036	ENSG00000167670	CHAF1A	chromatin assembly factor 1 subunit A	0.0522493	0.555546
7099	783.927	640.421	674.065	542.874	507.921	578.594	621.3	-0.343548	0.0921648	-3.72754	0.000193358	0.00110429	7099	ENSG00000136869	TLR4	toll like receptor 4	-2.9598	9.71384e-26
7275	254.803	239.652	252.908	173.759	201.969	197.491	220.097	-0.343504	0.122955	-2.79374	0.0052103	0.0197197	7275	ENSG00000166402	TUB	TUB bipartite transcription factor	0.730653	2.81202e-05
80144	314.438	297.136	298.989	217.935	226.965	257.271	268.789	-0.34303	0.114863	-2.98643	0.00282258	0.0115675	80144	ENSG00000138759	FRAS1	Fraser extracellular matrix complex subunit 1	-2.50115	1.07329e-25	YES
151176	1890.97	2107.48	1953.61	1507.87	1677.74	1479.58	1769.54	-0.342947	0.0663895	-5.16568	2.39563e-07	2.47468e-06	151176	ENSG00000178752	ERFE	erythroferrone	0.253188	0.0194877
4796	1666.52	1824.92	1813.22	1365.53	1450.77	1342.94	1577.32	-0.342857	0.0636887	-5.38334	7.31176e-08	8.23221e-07	4796	ENSG00000160949	TONSL	tonsoku like, DNA repair protein	-0.074775	0.547874
51678	542.135	456.634	552.969	424.09	387.94	388.576	458.724	-0.342791	0.0994532	-3.44676	0.000567352	0.00285455	51678	ENSG00000105926	MPP6	membrane palmitoylated protein 6	-0.142139	0.240119
2289	1935.42	1807.91	1852.88	1434.25	1329.79	1616.22	1662.75	-0.342759	0.07016	-4.88539	1.03226e-06	9.53127e-06	2289	ENSG00000096060	FKBP5	FKBP prolyl isomerase 5	0.017223	0.885322	YES
10301	230.949	208.886	176.822	164.924	171.973	131.305	180.81	-0.342364	0.139963	-2.4461	0.0144411	0.0460332	10301	ENSG00000176124	DLEU1	deleted in lymphocytic leukemia 1	0.357183	0.00799111
57673	371.904	381.338	380.434	248.367	289.955	338.403	335.067	-0.342075	0.112938	-3.02887	0.00245468	0.010253	57673	ENSG00000178409	BEND3	BEN domain containing 3	-0.770205	0.000100251	YES
118788	268.899	227.507	219.687	206.155	150.977	188.95	210.363	-0.34169	0.134032	-2.54931	0.0107936	0.0359724	118788	ENSG00000155629	PIK3AP1	phosphoinositide-3-kinase adaptor protein 1	-0.476822	0.0155891
54927	3246.3	2895.25	3023.11	2397.28	2374.63	2422.2	2726.46	-0.341681	0.0559544	-6.10642	1.01888e-09	1.51303e-08	54927	ENSG00000106554	CHCHD3	coiled-coil-helix-coiled-coil-helix domain containing 3	0.287913	0.0271188	YES
51053	1614.48	1566.64	1627.83	1359.64	1273.8	1130.5	1428.82	-0.3415	0.0701589	-4.86753	1.13003e-06	1.0336e-05	51053	ENSG00000112312	GMNN	geminin DNA replication inhibitor	0.354074	0.00280257
26519	931.387	844.449	952.693	711.725	731.886	686.413	809.759	-0.341294	0.0779869	-4.3763	1.20712e-05	9.17719e-05	26519	ENSG00000134809	TIMM10	translocase of inner mitochondrial membrane 10	0.172818	0.399479
26808	7.58989	14.5734	10.7165	2.94507	4.99922	4.27007	7.51569	-0.341188	0.176781	-1.93	0.0536063	0.133676	26808	ENSG00000238423	SNORD42B	small nucleolar RNA, C/D box 42B	-0.161677	0.653526
2819	41.2022	49.3877	50.3673	31.414	36.9942	28.8229	39.6981	-0.340923	0.19696	-1.73093	0.0834645	0.189596	2819	ENSG00000167588	GPD1	glycerol-3-phosphate dehydrogenase 1	-0.134193	0.733737	YES	YES
57205	1324.98	1348.85	1210.96	1020.96	985.847	1041.9	1155.58	-0.340686	0.0690858	-4.93135	8.16626e-07	7.68195e-06	57205	ENSG00000145246	ATP10D	ATPase phospholipid transporting 10D (putative)	-0.870439	1.00299e-06	YES
148203	374.073	323.044	326.852	292.543	240.963	256.204	302.28	-0.340557	0.114024	-2.98672	0.00281988	0.0115593	148203	ENSG00000172687	ZNF738	zinc finger protein 738	0.0406404	0.836517
145282	186.494	167.594	181.108	124.675	112.982	167.6	156.742	-0.340549	0.147023	-2.3163	0.0205422	0.0614295	145282	ENSG00000151338	MIPOL1	mirror-image polydactyly 1	-0.285209	0.106516
3105	6.50562	10.5253	15.003	2.94507	4.99922	3.20255	7.19679	-0.34015	0.173918	-1.95581	0.0504876	0.127437	3105	ENSG00000206503	HLA-A	major histocompatibility complex, class I, A	-0.815598	0.00956686
2395	506.354	492.258	555.112	375.987	427.933	404.589	460.372	-0.340109	0.0956171	-3.55699	0.000375134	0.00197522	2395	ENSG00000165060	FXN	frataxin	-0.446171	0.00449768
7283	6360.32	6341.87	6694.57	5011.52	5207.19	5055.76	5778.54	-0.340108	0.0456392	-7.45209	9.18751e-14	2.2168e-12	7283	ENSG00000131462	TUBG1	tubulin gamma 1	0.0770618	0.440976	YES
284900	159.388	186.216	185.395	154.125	130.98	118.494	155.766	-0.339973	0.142796	-2.38082	0.0172741	0.0532263	284900	ENSG00000235954	TTC28-AS1	TTC28 antisense RNA 1	0.533722	0.00269625
388906	34.6966	36.4336	28.9344	19.6338	27.9956	17.0803	27.4624	-0.339759	0.203992	-1.66555	0.0958036	0.211832	388906	NA	OGFRP1	opioid growth factor receptor pseudogene 1	-0.276336	0.475881
55038	2389.73	2489.63	2507.65	1951.6	2042.68	1812.64	2198.99	-0.339687	0.0590281	-5.75467	8.68128e-09	1.14604e-07	55038	ENSG00000170779	CDCA4	cell division cycle associated 4	-0.659408	7.06423e-12	YES
55320	1075.6	1045.24	1070.57	882.538	764.881	852.946	948.629	-0.339583	0.074337	-4.56815	4.92044e-06	4.06219e-05	55320	ENSG00000129534	MIS18BP1	MIS18 binding protein 1	-0.078511	0.482309
6182	3339.55	3184.29	3326.39	2387.47	2864.55	2483.04	2930.88	-0.33958	0.0638898	-5.31509	1.06604e-07	1.17073e-06	6182	ENSG00000262814	MRPL12	mitochondrial ribosomal protein L12	-0.000360599	0.998886	YES
2581	2220.58	2122.86	2076.85	1659.05	1633.75	1756.06	1911.53	-0.339518	0.0586453	-5.78934	7.06625e-09	9.42623e-08	2581	ENSG00000054983	GALC	galactosylceramidase	-0.757497	5.90843e-19	YES	YES
10572	1704.47	1649.23	1671.77	1157.41	1468.77	1311.98	1493.94	-0.33943	0.0748752	-4.53327	5.80774e-06	4.73586e-05	10572	ENSG00000184990	SIVA1	SIVA1 apoptosis inducing factor	-0.142031	0.476987	YES
81035	18.4326	30.7661	21.4329	16.6887	6.99891	17.0803	18.5666	-0.338715	0.20225	-1.67474	0.0939861	0.208426	81035	ENSG00000158270	COLEC12	collectin subfamily member 12	0.892969	0.00581948	YES	YES
991	1937.59	1820.87	2051.13	1541.25	1505.77	1516.94	1728.92	-0.338558	0.0619872	-5.46174	4.71494e-08	5.52293e-07	991	ENSG00000117399	CDC20	cell division cycle 20	-0.218498	0.00436256
10409	9300.86	9729.38	9042.55	7021.04	8081.74	7000.77	8362.73	-0.338335	0.0565653	-5.98131	2.21354e-09	3.14848e-08	10409	ENSG00000176788	BASP1	brain abundant membrane attached signal protein 1	0.303719	0.00142032
4864	6921.98	7316.67	7259.33	5612.32	5369.17	5966.35	6407.63	-0.338292	0.0499993	-6.76594	1.32448e-11	2.46519e-10	4864	ENSG00000141458	NPC1	NPC intracellular cholesterol transporter 1	-0.131653	0.306914	YES
83852	432.624	375.671	375.076	306.287	312.951	298.905	350.252	-0.338289	0.104662	-3.23221	0.00122837	0.00562864	83852	ENSG00000136169	SETDB2	SET domain bifurcated histone lysine methyltransferase 2	0.307609	0.0281911
4620	5.42135	8.09635	5.35823	0	0	1.06752	3.32391	-0.338251	0.134547	-2.51401	0.0119368	NA	4620	ENSG00000125414	MYH2	myosin heavy chain 2	0.139857	NA
54852	48.7921	70.4382	45.0091	37.3042	42.9933	35.228	46.6275	-0.338199	0.194833	-1.73584	0.0825913	0.188026	54852	ENSG00000137819	PAQR5	progestin and adipoQ receptor family member 5	-0.0108968	0.983154
303	17.3483	32.3854	24.6479	12.762	17.9972	13.8777	19.8364	-0.33819	0.20382	-1.65926	0.097064	0.21396	303	NA	ANXA2P1	annexin A2 pseudogene 1	0.350824	0.319285
7533	11593	10796.5	11399.1	8636.9	9153.58	8853.98	10072.2	-0.338157	0.0452261	-7.47704	7.60168e-14	1.85859e-12	7533	ENSG00000128245	YWHAH	tyrosine 3-monooxygenase/tryptophan 5-monooxygenase activation protein eta	0.164813	0.0649704	YES
9741	20845.1	20231.2	20101.9	16622	15566.6	16093.9	18243.4	-0.337908	0.0415402	-8.13448	4.13716e-16	1.26161e-14	9741	ENSG00000068697	LAPTM4A	lysosomal protein transmembrane 4 alpha	-0.0754981	0.603731	YES	YES
1316	7927.09	8140.88	8112.36	6468.35	5405.16	7123.54	7196.23	-0.337825	0.0698096	-4.83924	1.30339e-06	1.1817e-05	1316	ENSG00000067082	KLF6	Kruppel like factor 6	-0.458237	6.6902e-05	YES	YES
140700	726.461	697.096	680.495	522.259	563.912	561.514	625.289	-0.33779	0.082685	-4.08526	4.4027e-05	0.000294845	140700	ENSG00000130590	SAMD10	sterile alpha motif domain containing 10	-0.0292325	0.886825
29841	140.955	116.587	108.236	97.1872	76.988	99.279	106.539	-0.337626	0.161539	-2.09006	0.0366121	0.0984743	29841	ENSG00000134317	GRHL1	grainyhead like transcription factor 1	0.413075	0.120291	YES
10846	1323.89	1284.89	1339.56	1067.1	943.853	1089.93	1174.87	-0.337568	0.0707199	-4.77331	1.8122e-06	1.61553e-05	10846	ENSG00000112541	PDE10A	phosphodiesterase 10A	0.0249068	0.868702	YES	YES
51126	3668.08	3390.75	3719.68	2841.01	2872.55	2775.54	3211.27	-0.337476	0.0532282	-6.34017	2.29507e-10	3.70602e-09	51126	ENSG00000173418	NAA20	N-alpha-acetyltransferase 20, NatB catalytic subunit	0.241917	0.120662	YES
8482	7976.97	8330.33	8601.03	6171.88	7197.88	6248.17	7421.04	-0.337421	0.0577948	-5.83826	5.27483e-09	7.13441e-08	8482	ENSG00000138623	SEMA7A	semaphorin 7A (John Milton Hagen blood group)	-1.06289	1.36761e-28
132320	381.663	357.049	321.494	282.726	265.959	274.352	313.874	-0.337361	0.109072	-3.09302	0.0019813	0.00851676	132320	ENSG00000151466	SCLT1	sodium channel and clathrin linker 1	-0.0681819	0.573785	YES
5327	27245.5	27628	27094.4	21383.1	21958.6	21414.4	24454	-0.337244	0.0372723	-9.04811	1.45469e-19	6.01359e-18	5327	ENSG00000104368	PLAT	plasminogen activator, tissue type	-1.16959	9.50082e-10	YES	YES
51166	268.899	283.372	334.353	212.045	225.965	246.596	261.872	-0.337139	0.120311	-2.80222	0.00507519	0.0192923	51166	ENSG00000109576	AADAT	aminoadipate aminotransferase	-0.0706544	0.697067
10885	1082.1	974.801	1022.35	805.967	806.875	802.772	915.811	-0.337063	0.0728325	-4.62791	3.69368e-06	3.10841e-05	10885	ENSG00000065183	WDR3	WD repeat domain 3	0.180319	0.0786491	YES
151449	18.4326	18.6216	26.7911	12.762	10.9983	12.8102	16.736	-0.336987	0.20241	-1.66487	0.0959385	0.212017	151449	ENSG00000143869	GDF7	growth differentiation factor 7	NA	NA
26022	3180.16	3016.7	3182.79	2361.94	2583.6	2445.68	2795.15	-0.336836	0.0546792	-6.16022	7.2645e-10	1.09651e-08	26022	ENSG00000006042	TMEM98	transmembrane protein 98	-0.251415	0.0581483	YES
57724	4345.75	3997.17	4138.7	3283.75	3131.51	3425.66	3720.42	-0.336584	0.053481	-6.29353	3.10331e-10	4.93188e-09	57724	ENSG00000152223	EPG5	ectopic P-granules autophagy protein 5 homolog	-0.241209	0.125559	YES
4234	607.191	661.472	727.647	486.918	541.916	532.691	592.972	-0.336482	0.0903348	-3.72483	0.000195447	0.0011143	4234	ENSG00000037897	METTL1	methyltransferase like 1	-0.178232	0.156216	YES
65059	7002.21	6783.93	7123.23	5659.44	4905.24	5911.91	6230.99	-0.336188	0.0598451	-5.61763	1.93594e-08	2.4058e-07	65059	ENSG00000173166	RAPH1	Ras association (RalGDS/AF-6) and pleckstrin homology domains 1	-0.712804	1.2674e-08
23406	20392.9	19865.2	20694.6	14940.3	17287.3	15880.4	18176.8	-0.335935	0.0511464	-6.5681	5.09612e-11	8.81054e-10	23406	ENSG00000103187	COTL1	coactosin like F-actin binding protein 1	-0.356645	0.000878296	YES
24140	1697.97	1660.56	1701.77	1263.43	1399.78	1322.65	1507.69	-0.335754	0.0625347	-5.36908	7.91399e-08	8.86796e-07	24140	ENSG00000068438	FTSJ1	FtsJ RNA 2'-O-methyltransferase 1	-0.0335712	0.802808
10117	39.0337	46.1492	42.8658	29.4507	22.9964	35.228	35.954	-0.335686	0.199787	-1.68022	0.0929149	0.206641	10117	ENSG00000132464	ENAM	enamelin	0.028642	0.943661
80304	533.461	417.772	487.599	379.914	383.94	353.348	426.005	-0.335381	0.103787	-3.23144	0.00123167	0.00564061	80304	ENSG00000163026	WDCP	WD repeat and coiled coil containing	0.0833893	0.583676
440145	1457.26	1288.94	1418.86	1106.36	1047.84	1119.82	1239.85	-0.3353	0.0693557	-4.8345	1.33479e-06	1.20686e-05	440145	ENSG00000204899	MZT1	mitotic spindle organizing protein 1	0.16799	0.244317	YES
283989	711.281	760.247	744.794	521.277	638.901	577.526	659.004	-0.3353	0.0872992	-3.84082	0.000122625	0.000737532	283989	ENSG00000182173	TSEN54	tRNA splicing endonuclease subunit 54	0.163475	0.237432
91833	1200.29	1177.21	1163.81	925.733	921.857	941.55	1055.07	-0.335027	0.0668679	-5.01028	5.43495e-07	5.29339e-06	91833	ENSG00000140153	WDR20	WD repeat domain 20	-0.257316	0.0276739	YES
5932	3208.35	2926.02	2994.18	2416.92	2277.65	2505.46	2721.43	-0.335016	0.0574975	-5.82661	5.6565e-09	7.61324e-08	5932	ENSG00000101773	RBBP8	RB binding protein 8, endonuclease	0.270151	0.00292952	YES
3606	65.0562	54.2455	64.2987	39.2676	45.9928	45.9032	52.4607	-0.334967	0.188095	-1.78084	0.0749391	0.17418	3606	ENSG00000150782	IL18	interleukin 18	0.336525	0.228301
57758	136.618	132.78	122.168	107.004	90.9859	98.2115	114.628	-0.3348	0.153414	-2.18233	0.0290853	0.0819639	57758	ENSG00000175356	SCUBE2	signal peptide, CUB domain and EGF like domain containing 2	0.474113	0.103988
56952	599.601	536.788	502.602	443.723	372.942	462.235	486.315	-0.334678	0.100813	-3.31978	0.00090088	0.00428729	56952	ENSG00000099256	PRTFDC1	phosphoribosyl transferase domain containing 1	0.31929	0.0133821
6472	8112.5	8025.1	8222.74	5956.89	6969.92	6307.96	7265.85	-0.334622	0.0543666	-6.15491	7.51194e-10	1.12973e-08	6472	ENSG00000182199	SHMT2	serine hydroxymethyltransferase 2	-0.148269	0.133499	YES
92737	5.42135	4.85781	8.57317	0	0.999845	0	3.30869	-0.334508	0.133807	-2.49993	0.0124217	NA	92737	ENSG00000187957	DNER	delta/notch like EGF repeat containing	-0.486918	0.0765007
1969	10043.6	10945.5	10744.3	7959.53	9004.6	8103.52	9466.84	-0.334395	0.0536723	-6.23032	4.65495e-10	7.15694e-09	1969	ENSG00000142627	EPHA2	EPH receptor A2	-0.79947	1.6973e-20	YES	YES
204962	7.58989	9.71562	19.2896	6.87182	0.999845	5.33758	8.30073	-0.334295	0.174867	-1.91172	0.0559125	0.138185	204962	ENSG00000137968	SLC44A5	solute carrier family 44 member 5	-0.0247197	NA
348654	734.05	693.857	714.788	557.599	569.911	554.041	637.375	-0.334272	0.0807846	-4.13782	3.50625e-05	0.000240163	348654	ENSG00000178295	GEN1	GEN1 Holliday junction 5' flap endonuclease	0.239213	0.0453314
60481	6023.12	5984.01	5824.39	4794.57	4482.3	4824.11	5322.08	-0.334186	0.0474424	-7.04404	1.8675e-12	3.85826e-11	60481	ENSG00000012660	ELOVL5	ELOVL fatty acid elongase 5	-0.0363208	0.677536	YES
2870	2509	2385.18	2562.3	1892.7	2076.68	1912.99	2223.14	-0.334014	0.0586818	-5.69195	1.256e-08	1.6155e-07	2870	ENSG00000198055	GRK6	G protein-coupled receptor kinase 6	0.0202753	0.879076	YES
93986	55.2977	41.2914	39.6509	35.3408	33.9947	23.4854	38.1768	-0.333944	0.1994	-1.67474	0.0939849	0.208426	93986	ENSG00000128573	FOXP2	forkhead box P2	0.600391	0.028625
79596	477.079	553.79	511.175	434.888	384.94	387.509	458.23	-0.33388	0.0971608	-3.43637	0.000589566	0.00295373	79596	ENSG00000152193	OBI1	ORC ubiquitin ligase 1	0.178942	0.0656262
651430	11.927	13.7638	13.9314	5.89013	6.99891	5.33758	9.64146	-0.333492	0.188556	-1.76867	0.0769497	0.177853	651430	ENSG00000279943	FLJ38576	uncharacterized LOC651430	-0.0362144	0.937329
79642	2269.38	2190.87	2278.32	1775.88	1704.73	1842.53	2010.29	-0.333114	0.0569911	-5.84501	5.0653e-09	6.85661e-08	79642	ENSG00000180801	ARSJ	arylsulfatase family member J	-0.993337	1.00094e-18
10244	944.399	866.309	895.896	674.42	764.881	687.481	805.564	-0.332982	0.0789234	-4.21906	2.45328e-05	0.000174474	10244	ENSG00000136933	RABEPK	Rab9 effector protein with kelch motifs	0.0208346	0.918325	YES
4998	544.303	497.926	555.112	414.273	388.94	446.222	474.463	-0.332868	0.0945524	-3.52046	0.000430799	0.00223065	4998	ENSG00000085840	ORC1	origin recognition complex subunit 1	-0.211217	0.072873
130497	82.4045	79.3442	64.2987	41.2309	55.9913	67.2535	65.0872	-0.332807	0.184245	-1.80633	0.0708665	0.166754	130497	ENSG00000143867	OSR1	odd-skipped related transcription factor 1	-0.195394	0.498701
22903	1629.66	1514.83	1685.7	1254.6	1228.81	1324.79	1439.73	-0.332789	0.0656591	-5.06843	4.0111e-07	4.00577e-06	22903	ENSG00000132640	BTBD3	BTB domain containing 3	-0.14701	0.104963	YES
6300	2073.12	2045.95	2067.2	1592.3	1775.72	1513.74	1844.67	-0.332487	0.0642549	-5.1745	2.28525e-07	2.37402e-06	6300	ENSG00000188130	MAPK12	mitogen-activated protein kinase 12	-0.260961	0.0112092
8208	1521.23	1528.59	1592.47	1200.61	1180.82	1284.22	1384.66	-0.332429	0.0637638	-5.21344	1.85367e-07	1.95892e-06	8208	ENSG00000159259	CHAF1B	chromatin assembly factor 1 subunit B	-0.0495175	0.707406
2675	9.75843	10.5253	11.7881	3.92676	2.99953	5.33758	7.38928	-0.332175	0.1773	-1.87353	0.0609958	0.14819	2675	ENSG00000168546	GFRA2	GDNF family receptor alpha 2	-0.378398	0.116446
27340	1371.6	1190.16	1362.06	1124.03	909.859	1048.3	1167.67	-0.332171	0.081475	-4.07696	4.56278e-05	0.000304948	27340	ENSG00000120800	UTP20	UTP20 small subunit processome component	-0.468215	1.13603e-05	YES
55847	735.135	690.619	707.286	565.453	553.914	557.244	634.942	-0.332048	0.0809837	-4.10019	4.12818e-05	0.000278379	55847	ENSG00000122873	CISD1	CDGSH iron sulfur domain 1	0.517645	0.000724583	YES
51520	5899.51	5630.2	5681.87	4535.4	4457.31	4640.49	5140.8	-0.331827	0.0456534	-7.2684	3.63783e-13	8.15822e-12	51520	ENSG00000133706	LARS1	leucyl-tRNA synthetase 1	0.00115425	0.992828	YES
10200	586.59	548.933	539.038	468.266	430.933	413.129	497.815	-0.331653	0.0916576	-3.61839	0.00029644	0.00160641	10200	ENSG00000135698	MPHOSPH6	M-phase phosphoprotein 6	-0.0800084	0.510038	YES
53833	26.0225	21.8601	19.2896	6.87182	15.9975	16.0127	17.6757	-0.331621	0.20221	-1.63998	0.101009	0.220335	53833	ENSG00000174564	IL20RB	interleukin 20 receptor subunit beta	0.0758232	0.860604
122060	43.3708	28.3372	36.436	20.6155	28.9955	21.3503	29.8509	-0.331542	0.203359	-1.63033	0.103032	0.223887	122060	ENSG00000139737	SLAIN1	SLAIN motif family member 1	-1.26535	2.60512e-05
10714	1288.11	1119.73	1220.6	982.671	897.86	976.778	1080.96	-0.331232	0.0739579	-4.47865	7.51164e-06	5.96313e-05	10714	ENSG00000077514	POLD3	DNA polymerase delta 3, accessory subunit	0.190176	0.0448991	YES
91734	155.051	119.826	116.809	104.059	73.9885	115.292	114.171	-0.331223	0.164605	-2.01223	0.0441962	0.114648	91734	ENSG00000148377	IDI2	isopentenyl-diphosphate delta isomerase 2	-0.0473655	NA
57221	1417.14	1410.38	1381.35	1113.24	1064.83	1149.72	1256.11	-0.330696	0.064471	-5.12938	2.90694e-07	2.9658e-06	57221	ENSG00000112379	ARFGEF3	ARFGEF family member 3	-0.724448	7.51302e-06	YES	YES
388815	7.58989	6.47708	11.7881	1.96338	2.99953	2.13503	5.49217	-0.330548	0.162272	-2.037	0.0416503	0.109408	388815	ENSG00000215386	MIR99AHG	mir-99a-let-7c cluster host gene	-0.368498	0.313658
7468	6865.59	6728.07	7066.43	5440.52	5547.14	5397.36	6174.19	-0.330229	0.0439377	-7.51584	5.65457e-14	1.40541e-12	7468	ENSG00000109685	NSD2	nuclear receptor binding SET domain protein 2	-0.228927	0.0138166	YES
29880	1079.93	1038.76	1111.3	917.879	869.865	754.734	962.078	-0.330184	0.0786957	-4.1957	2.7203e-05	0.000191568	29880	ENSG00000120697	ALG5	ALG5 dolichyl-phosphate beta-glucosyltransferase	0.362194	0.00874232	YES
55159	3886.02	3723.51	3843.99	3030.47	2972.54	3075.52	3422.01	-0.330062	0.0486328	-6.78682	1.14628e-11	2.15538e-10	55159	ENSG00000168411	RFWD3	ring finger and WD repeat domain 3	-0.0371075	0.760058	YES
4718	792.601	727.052	752.295	610.611	552.914	624.497	676.662	-0.32984	0.0828119	-3.983	6.80503e-05	0.000434596	4718	ENSG00000151366	NDUFC2	NADH:ubiquinone oxidoreductase subunit C2	-0.093746	0.723508	YES
93099	1047.4	966.704	1027.71	813.82	837.87	745.127	906.439	-0.329762	0.0752218	-4.38386	1.16592e-05	8.87626e-05	93099	ENSG00000161249	DMKN	dermokine	-0.544246	7.42168e-05
54329	114.933	94.7273	98.5914	89.3337	60.9905	78.9962	89.5953	-0.329754	0.169748	-1.9426	0.052064	0.130668	54329	ENSG00000164604	GPR85	G protein-coupled receptor 85	0.288948	0.169763
5473	9.75843	8.09635	6.42987	2.94507	1.99969	1.06752	5.04949	-0.329751	0.158308	-2.08296	0.0372545	0.0997962	5473	ENSG00000163736	PPBP	pro-platelet basic protein	0.0444535	NA
653492	17.3483	10.5253	5.35823	3.92676	3.99938	4.27007	7.57133	-0.328974	0.174711	-1.88297	0.0597047	0.145675	653492	NA	PSG10P	pregnancy specific beta-1-glycoprotein 10, pseudogene	0.0446108	NA
375444	268.899	255.035	267.911	210.081	183.971	220.976	234.479	-0.328853	0.120857	-2.721	0.00650839	0.0236523	375444	ENSG00000172244	C5orf34	chromosome 5 open reading frame 34	0.656196	2.74071e-07
647024	1454.01	1465.44	1533.53	1127.96	1278.8	1113.42	1328.86	-0.328606	0.0690611	-4.75819	1.95334e-06	1.72831e-05	647024	ENSG00000188112	C6orf132	chromosome 6 open reading frame 132	-0.560311	5.10674e-05
84515	2049.27	1919.64	1939.68	1617.82	1503.77	1557.51	1764.61	-0.328484	0.0598418	-5.4892	4.03759e-08	4.77008e-07	84515	ENSG00000125885	MCM8	minichromosome maintenance 8 homologous recombination repair factor	0.433434	2.67827e-05
148189	191.916	170.833	192.896	142.345	141.978	143.047	163.836	-0.328104	0.135699	-2.41787	0.0156116	0.0490363	148189	ENSG00000261824	LINC00662	long intergenic non-protein coding RNA 662	0.0324762	0.894081
9145	477.079	547.313	467.238	400.529	412.936	358.686	443.963	-0.328086	0.0996882	-3.29112	0.000997888	0.00468155	9145	ENSG00000100321	SYNGR1	synaptogyrin 1	0.490991	8.93768e-06
353219	31.4438	34.8143	34.2927	23.5605	20.9967	22.4178	27.921	-0.328013	0.203217	-1.6141	0.106506	0.229808	353219	ENSG00000146049	KAAG1	kidney associated antigen 1	-0.30109	0.421758
25786	165.893	160.308	196.111	131.546	117.982	150.52	153.727	-0.327817	0.143904	-2.27802	0.0227255	0.066953	25786	ENSG00000273311	DGCR11	DiGeorge syndrome critical region gene 11	-0.356061	0.0538865
150	15.1798	16.1927	19.2896	11.7803	10.9983	2.13503	12.5959	-0.327748	0.192468	-1.70287	0.0885925	0.198786	150	ENSG00000150594	ADRA2A	adrenoceptor alpha 2A	-0.105547	NA
6183	1846.51	1802.25	1881.81	1423.45	1580.75	1373.89	1651.44	-0.327638	0.0647281	-5.06176	4.15406e-07	4.12115e-06	6183	ENSG00000128626	MRPS12	mitochondrial ribosomal protein S12	0.13336	0.36546	YES
84188	3245.22	3103.33	3085.27	2592.64	2292.64	2595.13	2819.04	-0.327626	0.0586231	-5.58869	2.28785e-08	2.82401e-07	84188	ENSG00000197601	FAR1	fatty acyl-CoA reductase 1	0.121679	0.144017	YES
6309	1738.08	1650.85	1757.5	1407.74	1264.8	1402.72	1536.95	-0.327318	0.0646351	-5.06409	4.10366e-07	4.08094e-06	6309	ENSG00000109929	SC5D	sterol-C5-desaturase	0.418975	0.000130691	YES
1122	1064.75	1018.52	1005.2	822.655	722.888	893.511	921.255	-0.327314	0.0803167	-4.0753	4.59552e-05	0.000306866	1122	ENSG00000203668	CHML	CHM like Rab escort protein	0.0199702	0.908331
440590	269.983	216.982	237.905	212.045	189.97	155.857	213.791	-0.327307	0.133207	-2.45712	0.0140055	0.0448263	440590	ENSG00000203995	ZYG11A	zyg-11 family member A, cell cycle regulator	-0.0595216	0.691131
4008	6081.67	5737.07	5634.71	4763.16	4387.32	4709.88	5218.97	-0.327195	0.0508382	-6.436	1.22661e-10	2.04164e-09	4008	ENSG00000136153	LMO7	LIM domain 7	-0.264019	0.0681941
9144	6543.57	6938.57	6338.78	5022.32	5561.14	5160.38	5927.46	-0.327088	0.0527046	-6.20606	5.43304e-10	8.28388e-09	9144	ENSG00000108639	SYNGR2	synaptogyrin 2	-0.503458	5.16411e-07	YES
57528	93.2472	116.587	120.024	74.6084	90.9859	83.2663	96.4532	-0.326813	0.164347	-1.98856	0.0467501	0.119666	57528	ENSG00000183775	KCTD16	potassium channel tetramerization domain containing 16	-0.705561	0.0339715
26153	13.0112	17.812	8.57317	6.87182	7.99876	2.13503	9.40033	-0.326613	0.18315	-1.78331	0.0745354	0.173378	26153	ENSG00000066735	KIF26A	kinesin family member 26A	-0.0749881	NA
7163	2396.24	2159.3	2249.38	1794.53	1731.73	1869.22	2033.4	-0.326605	0.0602681	-5.4192	5.98675e-08	6.87146e-07	7163	ENSG00000076554	TPD52	tumor protein D52	-0.330554	0.00220798	YES
23035	870.668	853.355	813.379	637.116	661.897	707.763	757.363	-0.326523	0.0782498	-4.17282	3.00846e-05	0.000210071	23035	ENSG00000040199	PHLPP2	PH domain and leucine rich repeat protein phosphatase 2	-0.145407	0.376315	YES
5827	870.668	852.546	983.771	609.629	787.877	733.384	806.313	-0.326485	0.0911819	-3.58059	0.000342824	0.00182662	5827	ENSG00000176894	PXMP2	peroxisomal membrane protein 2	0.321905	0.0373981	YES	YES
10266	49.8764	46.9588	46.0808	34.3591	29.9953	36.2956	40.5943	-0.326429	0.19575	-1.66758	0.0953982	0.211189	10266	ENSG00000131477	RAMP2	receptor activity modifying protein 2	-0.939268	9.73997e-05
28986	901.028	976.42	874.463	782.406	747.884	642.645	820.808	-0.326391	0.0840207	-3.88465	0.000102475	0.000629165	28986	ENSG00000187601	MAGEH1	MAGE family member H1	-0.300214	0.0294965	YES
55721	236.371	217.792	190.753	160.997	171.973	166.533	190.736	-0.326304	0.130997	-2.49093	0.0127408	0.0414119	55721	ENSG00000160051	IQCC	IQ motif containing C	-0.0892782	0.667809
388335	111.68	103.633	99.6631	78.5351	85.9866	72.5911	92.0148	-0.326292	0.163731	-1.99285	0.0462781	0.118808	388335	ENSG00000187824	TMEM220	transmembrane protein 220	-0.688688	0.000128647
3572	7199.55	7102.12	6712.79	5650.6	5132.2	5910.84	6284.68	-0.326239	0.0549224	-5.94	2.85018e-09	4.00235e-08	3572	ENSG00000134352	IL6ST	interleukin 6 signal transducer	-0.391864	0.00100816	YES
3985	3259.31	3514.63	3389.62	2767.38	2683.58	2628.23	3040.46	-0.326156	0.0523848	-6.22615	4.78038e-10	7.32932e-09	3985	ENSG00000182541	LIMK2	LIM domain kinase 2	-0.105414	0.246912	YES
50865	2610.92	2515.54	2639.46	1988.9	2122.67	2054.97	2322.08	-0.326062	0.0547009	-5.96083	2.50962e-09	3.54219e-08	50865	ENSG00000013583	HEBP1	heme binding protein 1	0.0665572	0.700942
64840	697.185	655.804	693.355	549.746	529.918	534.826	610.139	-0.325931	0.0825012	-3.95062	7.79486e-05	0.000490607	64840	ENSG00000102312	PORCN	porcupine O-acyltransferase	0.00727028	0.96341	YES
10690	52.0449	40.4818	36.436	26.5056	21.9966	39.4981	36.1605	-0.325753	0.2013	-1.61824	0.10561	0.228332	10690	ENSG00000172461	FUT9	fucosyltransferase 9	-2.21092	1.57501e-14
6204	300.343	236.413	247.55	184.558	211.967	211.368	232.033	-0.325596	0.126499	-2.5739	0.0100561	0.0340099	6204	ENSG00000124614	RPS10	ribosomal protein S10	0.157579	0.51519	YES
9397	1975.54	1836.25	1897.88	1554.01	1430.78	1544.7	1706.53	-0.325575	0.0614855	-5.29515	1.18919e-07	1.29139e-06	9397	ENSG00000152465	NMT2	N-myristoyltransferase 2	0.436845	1.34828e-06	YES
160428	588.758	603.988	594.763	451.577	453.929	506.003	533.17	-0.325404	0.0882934	-3.68549	0.000228265	0.00127977	160428	ENSG00000136010	ALDH1L2	aldehyde dehydrogenase 1 family member L2	0.0773638	0.745152
55781	731.882	684.951	707.286	575.27	507.921	593.539	633.475	-0.324973	0.0856717	-3.79323	0.0001487	0.00087091	55781	ENSG00000058729	RIOK2	RIO kinase 2	0.29898	0.00348205
157638	5561.22	5626.96	5187.84	4342.01	4303.33	4391.76	4902.19	-0.324771	0.048275	-6.72752	1.72574e-11	3.16922e-10	157638	ENSG00000168672	LRATD2	LRAT domain containing 2	0.363493	0.000557221
2054	1469.19	1390.14	1401.71	1162.32	1108.83	1109.15	1273.56	-0.324725	0.0642955	-5.05051	4.40639e-07	4.35774e-06	2054	ENSG00000111450	STX2	syntaxin 2	-0.119342	0.300816	YES
4744	803.444	773.201	801.591	635.153	623.903	622.362	709.942	-0.324549	0.0772822	-4.19953	2.67468e-05	0.000188597	4744	ENSG00000100285	NEFH	neurofilament heavy	-4.62054	7.09303e-87
3843	10699.6	10058.1	10420.7	8347.3	7719.8	8740.83	9331.05	-0.324474	0.0508354	-6.38283	1.73841e-10	2.83918e-09	3843	ENSG00000065150	IPO5	importin 5	0.00332839	0.979404	YES
440087	9.75843	4.85781	9.64481	1.96338	0	3.20255	4.9045	-0.324095	0.152487	-2.12539	0.0335541	NA	440087	ENSG00000179256	SMCO3	single-pass membrane protein with coiled-coil domains 3	NA	NA
51422	1217.63	1169.11	1153.09	953.22	833.87	1017.34	1057.38	-0.32405	0.0767471	-4.22231	2.41813e-05	0.000172345	51422	ENSG00000106617	PRKAG2	protein kinase AMP-activated non-catalytic subunit gamma 2	0.494703	6.33182e-09
137902	37.9494	22.6698	37.5076	15.707	23.9963	23.4854	26.8859	-0.324025	0.204492	-1.58453	0.113072	0.240367	137902	ENSG00000147485	PXDNL	peroxidasin like	-0.374345	0.276588
80010	1028.97	876.025	869.105	774.553	715.889	700.291	827.472	-0.324022	0.0831546	-3.89662	9.7543e-05	0.000602238	80010	ENSG00000178966	RMI1	RecQ mediated genome instability 1	0.0205407	0.883849	YES
10452	4697.06	4891.01	4932.79	3555.68	4238.34	3754.46	4344.89	-0.323278	0.0599526	-5.39224	6.95865e-08	7.88838e-07	10452	ENSG00000130204	TOMM40	translocase of outer mitochondrial membrane 40	-0.138109	0.153989	YES
11245	5040.77	4718.55	5037.81	3757.91	4008.38	4014.93	4429.72	-0.323268	0.0505892	-6.39006	1.65824e-10	2.72168e-09	11245	ENSG00000166073	GPR176	G protein-coupled receptor 176	-0.61455	3.53594e-13
54968	907.534	987.755	938.762	719.578	759.882	770.747	847.376	-0.323123	0.0748775	-4.31535	1.59349e-05	0.000118263	54968	ENSG00000175606	TMEM70	transmembrane protein 70	0.191889	0.20842	YES
10785	748.146	800.729	888.394	611.592	653.898	662.928	727.615	-0.323122	0.0837505	-3.85815	0.00011425	0.000694747	10785	ENSG00000160193	WDR4	WD repeat domain 4	-0.520429	1.32902e-05	YES
27242	5660.97	5558.95	5776.17	4321.39	4686.27	4535.88	5089.94	-0.322867	0.0479021	-6.74015	1.58226e-11	2.91546e-10	27242	ENSG00000146072	TNFRSF21	TNF receptor superfamily member 21	-1.16199	2.59705e-21	YES
23603	20970.9	19467.7	20582	15749.2	16227.5	16688.5	18281	-0.322456	0.0439477	-7.33728	2.17977e-13	5.04584e-12	23603	ENSG00000110880	CORO1C	coronin 1C	-0.29097	2.76392e-05	YES
2920	3464.24	3662.79	3549.29	2918.56	2818.56	2773.41	3197.81	-0.322408	0.0506587	-6.36432	1.96159e-10	3.19421e-09	2920	ENSG00000081041	CXCL2	C-X-C motif chemokine ligand 2	-1.03012	1.39828e-05
126868	29.2753	31.5758	41.7942	29.4507	18.997	19.2153	28.3847	-0.322149	0.203924	-1.57976	0.114163	0.24197	126868	ENSG00000173212	MAB21L3	mab-21 like 3	-0.525653	0.105286
284217	718.871	728.672	772.657	569.38	560.913	628.767	663.21	-0.321841	0.0827502	-3.88931	0.000100529	0.000619052	284217	ENSG00000101680	LAMA1	laminin subunit alpha 1	-1.65151	2.81185e-12
54996	251.551	223.459	276.485	206.155	199.969	177.208	222.471	-0.321762	0.126352	-2.54655	0.0108793	0.0361943	54996	ENSG00000117791	MTARC2	mitochondrial amidoxime reducing component 2	0.209918	0.154422
708	4502.97	4204.43	4566.28	3319.09	3709.42	3544.16	3974.39	-0.321607	0.0551417	-5.83238	5.46426e-09	7.37252e-08	708	ENSG00000108561	C1QBP	complement C1q binding protein	0.270434	0.0609065	YES
54898	378.41	347.333	372.933	283.708	283.956	295.702	327.007	-0.321495	0.104852	-3.06618	0.00216813	0.00919077	54898	ENSG00000197977	ELOVL2	ELOVL fatty acid elongase 2	0.66902	1.53748e-11
259232	179.989	145.734	166.105	136.455	113.982	127.034	144.883	-0.32145	0.144996	-2.21696	0.0266257	0.0761367	259232	ENSG00000102452	NALCN	sodium leak channel, non-selective	-0.476922	0.123353
284	43.3708	21.8601	47.1524	26.5056	28.9955	17.0803	30.8274	-0.321041	0.204387	-1.57075	0.116242	0.245244	284	ENSG00000154188	ANGPT1	angiopoietin 1	-0.353859	0.107651
81563	686.343	611.274	650.489	516.368	512.92	511.34	581.456	-0.320914	0.0854875	-3.75393	0.000174084	0.00100358	81563	ENSG00000116667	C1orf21	chromosome 1 open reading frame 21	0.612336	6.04195e-07
26049	254.803	237.223	233.619	170.814	158.975	233.786	214.87	-0.320733	0.135299	-2.37055	0.0177615	0.0543231	26049	ENSG00000198780	FAM169A	family with sequence similarity 169 member A	-0.0633718	0.718786
7347	1436.66	1353.71	1383.49	1094.58	1137.82	1087.8	1249.01	-0.320721	0.0645511	-4.96848	6.74807e-07	6.48443e-06	7347	ENSG00000118939	UCHL3	ubiquitin C-terminal hydrolase L3	0.253663	0.045953	YES
375295	397.927	358.668	409.369	281.745	309.952	324.525	347.031	-0.320674	0.106144	-3.02111	0.00251851	0.0104853	375295	NA	LINC01116	long intergenic non-protein coding RNA 1116	0.106497	0.617745
857	19784.7	18355.2	18999.2	15400.7	14711.7	15519.6	17128.5	-0.320515	0.0438425	-7.3106	2.65955e-13	6.09667e-12	857	ENSG00000105974	CAV1	caveolin 1	0.392927	0.00132548	YES
7965	970.421	948.083	947.335	750.992	769.88	756.869	857.263	-0.320506	0.0719087	-4.45712	8.30676e-06	6.53781e-05	7965	ENSG00000106305	AIMP2	aminoacyl tRNA synthetase complex interacting multifunctional protein 2	0.18715	0.16013	YES
5426	4822.83	5141.99	5159.97	3982.71	4161.35	3930.6	4533.24	-0.320356	0.0493618	-6.48996	8.58614e-11	1.4555e-09	5426	ENSG00000177084	POLE	DNA polymerase epsilon, catalytic subunit	-0.128174	0.22872
6118	2412.5	2201.4	2201.16	1847.54	1836.71	1744.32	2040.61	-0.320059	0.0596051	-5.36966	7.88844e-08	8.84533e-07	6118	ENSG00000117748	RPA2	replication protein A2	-0.0366508	0.808839	YES
101928344	4.33708	4.85781	19.2896	0	3.99938	2.13503	5.76982	-0.319787	0.151941	-2.10468	0.0353193	0.0956979	101928344	NA	LOC101928344	uncharacterized LOC101928344	-0.268099	0.317409
10052	3753.74	3641.74	3863.28	2978.44	2963.54	3045.62	3374.4	-0.319773	0.0494213	-6.47035	9.77746e-11	1.64732e-09	10052	ENSG00000182963	GJC1	gap junction protein gamma 1	-0.653002	8.89296e-06
10966	475.994	516.547	513.318	364.207	451.93	372.563	449.093	-0.319756	0.100655	-3.17676	0.00148931	0.00666721	10966	ENSG00000141542	RAB40B	RAB40B, member RAS oncogene family	0.400708	0.0257085
51187	2867.89	2606.22	2726.27	2099.83	2151.67	2286.62	2456.42	-0.319539	0.0580173	-5.50765	3.6365e-08	4.32404e-07	51187	ENSG00000137876	RSL24D1	ribosomal L24 domain containing 1	0.210547	0.0466986	YES
121441	1509.3	1364.23	1325.63	1090.66	1044.84	1204.16	1256.47	-0.319351	0.0734089	-4.35029	1.35955e-05	0.000102183	121441	ENSG00000139350	NEDD1	NEDD1 gamma-tubulin ring complex targeting factor	0.127718	0.136513	YES
23102	3380.75	3472.52	3315.67	2774.25	2667.59	2682.67	3048.91	-0.319262	0.0502545	-6.3529	2.11294e-10	3.43051e-09	23102	ENSG00000167202	TBC1D2B	TBC1 domain family member 2B	-0.224087	0.0449816	YES
3787	23.8539	24.2891	33.221	19.6338	17.9972	13.8777	22.1454	-0.319171	0.204649	-1.5596	0.118855	0.249738	3787	ENSG00000124134	KCNS1	potassium voltage-gated channel modifier subfamily S member 1	0.0648445	0.884465
55863	1258.84	1110.82	1130.59	972.854	883.863	924.469	1046.9	-0.319092	0.0739002	-4.31787	1.57541e-05	0.000117131	55863	ENSG00000171204	TMEM126B	transmembrane protein 126B	0.497267	0.000184744	YES
23232	647.309	697.096	742.65	562.508	548.915	544.433	623.818	-0.319017	0.0844185	-3.77899	0.000157463	0.000917684	23232	ENSG00000108239	TBC1D12	TBC1 domain family member 12	0.506207	9.50283e-06	YES
133	1678.45	1973.89	1801.44	1442.1	1454.77	1453.96	1634.1	-0.318972	0.0666066	-4.7889	1.67699e-06	1.49985e-05	133	ENSG00000148926	ADM	adrenomedullin	-0.86685	1.57229e-06	YES	YES
8226	691.764	650.137	692.283	514.405	559.913	539.096	607.933	-0.318396	0.0837236	-3.80294	0.000142991	0.000842849	8226	ENSG00000130021	PUDP	pseudouridine 5'-phosphatase	-0.149165	0.219704
101927220	6.50562	5.66745	6.42987	0.981689	0	1.06752	3.44202	-0.31836	0.138131	-2.30477	0.0211796	NA	101927220	ENSG00000234264	DEPDC1-AS1	DEPDC1 antisense RNA 1	-0.694268	0.0380523
57730	152.882	124.684	148.959	109.949	108.983	107.819	125.546	-0.31821	0.150083	-2.12023	0.0339866	0.0927406	57730	ENSG00000196912	ANKRD36B	ankyrin repeat domain 36B	0.101902	0.689864
735301	94.3314	93.9177	113.594	71.6633	99.9845	52.3083	87.6333	-0.318152	0.177753	-1.78986	0.0734766	0.171553	735301	ENSG00000255198	SNHG9	small nucleolar RNA host gene 9	0.748889	0.00307756
8487	286.247	270.418	305.419	235.605	216.966	223.111	256.294	-0.318113	0.115957	-2.74337	0.00608119	0.0223803	8487	ENSG00000092208	GEMIN2	gem nuclear organelle associated protein 2	0.0854613	0.653526
7504	46.6236	42.101	48.2241	37.3042	21.9966	36.2956	38.7575	-0.318035	0.198995	-1.59821	0.109997	0.235162	7504	ENSG00000047597	XK	X-linked Kx blood group	-0.774152	0.0115911
2618	3197.51	2992.41	3181.72	2489.56	2332.64	2659.18	2808.84	-0.317839	0.0585768	-5.42601	5.76262e-08	6.63263e-07	2618	ENSG00000159131	GART	phosphoribosylglycinamide formyltransferase, phosphoribosylglycinamide synthetase, phosphoribosylaminoimidazole synthetase	-0.0846334	0.491134	YES
195827	403.348	387.815	416.87	282.726	329.949	340.538	360.208	-0.317357	0.104926	-3.02459	0.00248971	0.0103861	195827	ENSG00000158122	PRXL2C	peroxiredoxin like 2C	-0.0893019	0.585548	YES
1434	12909.3	12117.8	12584.3	10103.5	9517.52	10472.3	11284.1	-0.31724	0.0472975	-6.70733	1.98224e-11	3.6082e-10	1434	ENSG00000124207	CSE1L	chromosome segregation 1 like	0.5892	1.22183e-10	YES
945	32.5281	38.0528	41.7942	23.5605	27.9956	25.6204	31.5919	-0.317142	0.20169	-1.57242	0.115853	0.24458	945	ENSG00000105383	CD33	CD33 molecule	-1.43268	1.09852e-09
5325	814.286	782.917	773.728	675.402	551.914	655.455	708.951	-0.317111	0.0859626	-3.68894	0.000225193	0.00126512	5325	ENSG00000118495	PLAGL1	PLAG1 like zinc finger 1	-0.297598	0.0327935
56853	33.6124	25.9083	31.0777	14.7253	24.9961	19.2153	24.9225	-0.3163	0.204561	-1.54624	0.122047	0.25457	56853	ENSG00000101489	CELF4	CUGBP Elav-like family member 4	-0.373583	0.246149
3709	3094.51	3052.32	3043.47	2511.16	2259.65	2578.05	2756.53	-0.316263	0.0574876	-5.50141	3.76776e-08	4.47046e-07	3709	ENSG00000123104	ITPR2	inositol 1,4,5-trisphosphate receptor type 2	-0.483711	0.000761332	YES
55780	125.775	16.1927	48.2241	20.6155	7.99876	21.3503	40.0261	-0.31604	0.156706	-2.01677	0.0437193	0.113633	55780	ENSG00000130023	ERMARD	ER membrane associated RNA degradation	-0.148787	0.64147
375704	129.028	151.402	142.529	84.4253	133.979	105.684	124.508	-0.316028	0.15857	-1.99299	0.046263	0.118806	375704	ENSG00000168913	ENHO	energy homeostasis associated	0.129662	0.728808
7301	1041.98	1038.76	1050.21	765.717	915.858	812.38	937.485	-0.315989	0.076975	-4.10509	4.0416e-05	0.000272874	7301	ENSG00000092445	TYRO3	TYRO3 protein tyrosine kinase	0.0964488	0.409435	YES	YES
6119	880.427	775.63	802.663	619.446	694.892	639.442	735.417	-0.315906	0.0823599	-3.83568	0.000125217	0.000751755	6119	ENSG00000106399	RPA3	replication protein A3	0.682886	1.42207e-06
27338	6246.48	6235	6608.84	4728.8	5751.11	4769.66	5723.31	-0.315601	0.0645454	-4.8896	1.01039e-06	9.36609e-06	27338	ENSG00000108106	UBE2S	ubiquitin conjugating enzyme E2 S	0.0178573	0.906228	YES
729987	36.8652	22.6698	34.2927	25.5239	19.9969	14.9452	25.7156	-0.315596	0.204611	-1.54242	0.122972	0.255819	729987	ENSG00000226053	LINC01776	long intergenic non-protein coding RNA 1776	-0.533459	0.0868241
3676	646.225	619.371	608.695	470.229	465.928	552.974	560.57	-0.315547	0.0906548	-3.48075	0.000500006	0.00255301	3676	ENSG00000115232	ITGA4	integrin subunit alpha 4	0.0830726	0.604213	YES
6196	72.6461	74.4864	64.2987	45.1577	51.9919	59.7809	61.3936	-0.31542	0.182569	-1.72767	0.0840468	0.190682	6196	ENSG00000071242	RPS6KA2	ribosomal protein S6 kinase A2	-1.28741	3.42874e-05
4724	1535.33	1370.71	1519.59	1164.28	1233.81	1130.5	1325.7	-0.315303	0.0686646	-4.59193	4.39157e-06	3.65478e-05	4724	ENSG00000164258	NDUFS4	NADH:ubiquinone oxidoreductase subunit S4	0.556308	0.000160364	YES
23136	3489.18	3333.27	3367.11	2649.58	2666.59	2842.8	3058.09	-0.315264	0.0521645	-6.04364	1.50672e-09	2.18447e-08	23136	ENSG00000082397	EPB41L3	erythrocyte membrane protein band 4.1 like 3	0.591889	1.57305e-06
9659	4335.99	4298.35	4351.95	3446.71	3444.46	3516.4	3898.98	-0.315232	0.0459605	-6.85875	6.94655e-12	1.34915e-10	9659	ENSG00000178104	PDE4DIP	phosphodiesterase 4D interacting protein	0.0352124	0.857666	YES	YES
1965	4767.53	4366.36	4709.88	3556.66	3776.41	3753.39	4155.04	-0.314528	0.0520233	-6.0459	1.4858e-09	2.15604e-08	1965	ENSG00000134001	EIF2S1	eukaryotic translation initiation factor 2 subunit alpha	-0.410485	1.67213e-06	YES
100996758	5.42135	6.47708	6.42987	0.981689	0	1.06752	3.39625	-0.314176	0.137526	-2.28448	0.0223435	NA	100996758	ENSG00000264717	NPY4R2	neuropeptide Y receptor Y4-2	-0.275322	0.460855
127943	229.865	246.939	256.123	195.356	180.972	199.626	218.147	-0.313876	0.122693	-2.55822	0.0105209	0.0352573	127943	ENSG00000162746	FCRLB	Fc receptor like B	0.135533	0.733392
145264	13.0112	17.0023	8.57317	6.87182	5.99907	5.33758	9.46587	-0.313817	0.186463	-1.683	0.0923755	0.205717	145264	ENSG00000165953	SERPINA12	serpin family A member 12	NA	NA
1810	3632.3	3676.55	3488.21	2850.82	3009.53	2796.89	3242.39	-0.313696	0.0518152	-6.05412	1.41185e-09	2.05958e-08	1810	ENSG00000117505	DR1	down-regulator of transcription 1	0.0795092	0.383517	YES
253714	1362.93	1294.61	1292.4	1071.02	976.848	1109.15	1184.49	-0.313593	0.0693805	-4.5199	6.18686e-06	5.0194e-05	253714	ENSG00000146263	MMS22L	MMS22 like, DNA repair protein	0.153971	0.186407
9241	1239.32	1215.26	1215.25	965	1017.84	951.157	1100.64	-0.313525	0.0669525	-4.6828	2.82989e-06	2.431e-05	9241	ENSG00000183691	NOG	noggin	-0.511888	0.008817
2247	3807.95	3751.85	3669.31	3021.64	2979.54	3007.19	3372.91	-0.313514	0.0479445	-6.5391	6.18915e-11	1.06225e-09	2247	ENSG00000138685	FGF2	fibroblast growth factor 2	-0.656376	5.13101e-14
79807	1061.5	958.608	1026.64	856.033	774.879	798.502	912.693	-0.313299	0.0751884	-4.16686	3.08829e-05	0.000215373	79807	ENSG00000138780	GSTCD	glutathione S-transferase C-terminal domain containing	-0.511196	1.22492e-05
119	18.4326	33.195	38.5792	10.7986	25.996	20.2828	24.5474	-0.313111	0.204356	-1.53218	0.125477	0.259437	119	ENSG00000075340	ADD2	adducin 2	-0.803101	0.0092181
151188	1795.55	1862.16	1757.5	1460.75	1560.76	1309.84	1624.43	-0.313105	0.0680119	-4.60368	4.15096e-06	3.47202e-05	151188	ENSG00000177917	ARL6IP6	ADP ribosylation factor like GTPase 6 interacting protein 6	-0.323014	0.000327543
51691	1142.82	1017.71	1154.16	928.678	841.869	872.161	992.9	-0.313026	0.0754799	-4.14715	3.36645e-05	0.000232417	51691	ENSG00000128534	LSM8	LSM8 homolog, U6 small nuclear RNA associated	0.592977	0.000114646	YES
80255	5756.39	5746.79	5601.49	4691.49	4351.32	4685.33	5138.8	-0.313018	0.047889	-6.53632	6.30499e-11	1.081e-09	80255	ENSG00000115084	SLC35F5	solute carrier family 35 member F5	-0.468184	1.40312e-06	YES
93474	219.022	213.744	176.822	166.887	154.976	154.79	181.04	-0.312851	0.134015	-2.33444	0.0195725	0.0589136	93474	ENSG00000277462	ZNF670	zinc finger protein 670	0.192959	0.269846
3087	233.118	252.606	226.117	166.887	186.971	206.031	211.955	-0.312825	0.12676	-2.46786	0.0135924	0.0436734	3087	ENSG00000152804	HHEX	hematopoietically expressed homeobox	0.499277	0.000405759
92359	471.657	446.109	461.879	337.701	394.939	361.888	412.362	-0.312504	0.0982888	-3.17944	0.00147557	0.00662006	92359	ENSG00000130545	CRB3	crumbs cell polarity complex component 3	0.120304	0.459615
8420	483.584	515.737	502.602	421.145	378.941	394.981	449.498	-0.312318	0.0936967	-3.33329	0.000858253	0.00410333	8420	ENSG00000242125	SNHG3	small nucleolar RNA host gene 3	-0.17031	0.331189
283143	71.5618	76.1057	60.0122	46.1394	56.9911	51.2408	60.3418	-0.312034	0.183416	-1.70123	0.0888989	0.199446	283143	NA	LINC00900	long intergenic non-protein coding RNA 900	-1.02991	0.000371984
60672	592.011	676.855	657.99	503.606	546.915	485.72	577.183	-0.311904	0.0891192	-3.49986	0.00046551	0.00239314	60672	ENSG00000116691	MIIP	migration and invasion inhibitory protein	0.0542178	0.773063	YES
100379345	42.2865	33.195	37.5076	30.4324	31.995	12.8102	31.3711	-0.311591	0.203932	-1.52792	0.126533	0.260961	100379345	ENSG00000224020	MIR181A2HG	MIR181A2 host gene	-0.282441	0.440582
283489	2079.63	1923.69	2075.78	1717.96	1448.77	1697.35	1823.86	-0.311502	0.0691555	-4.50437	6.65698e-06	5.35931e-05	283489	ENSG00000198824	CHAMP1	chromosome alignment maintaining phosphoprotein 1	-0.23376	0.139549	YES
92002	592.011	548.123	556.184	449.614	471.927	428.074	507.655	-0.311491	0.0898086	-3.46839	0.000523582	0.00265534	92002	ENSG00000262919	CCNQ	cyclin Q	0.221538	0.106967	YES
55901	2410.33	2484.77	2488.36	1961.41	1998.69	1968.5	2218.68	-0.311414	0.0531954	-5.85416	4.79437e-09	6.51656e-08	55901	ENSG00000136114	THSD1	thrombospondin type 1 domain containing 1	0.244879	0.0777046
374900	76.9831	59.913	65.3704	54.9746	51.9919	41.6331	58.4777	-0.311235	0.185367	-1.67902	0.0931479	0.206901	374900	ENSG00000198453	ZNF568	zinc finger protein 568	-0.456115	0.157367
2318	42329.9	44521	45073.4	33542.3	36623.3	35878.2	39661.4	-0.311231	0.0450526	-6.90817	4.90951e-12	9.67156e-11	2318	ENSG00000128591	FLNC	filamin C	-0.0715581	0.686926
85465	1509.3	1505.11	1389.92	1248.71	1099.83	1180.67	1322.26	-0.310797	0.0686888	-4.52471	6.04785e-06	4.92166e-05	85465	ENSG00000138018	SELENOI	selenoprotein I	-0.349139	0.00182837	YES
10762	3553.15	3467.67	3340.32	2782.11	2736.57	2807.57	3114.56	-0.310731	0.0502711	-6.18111	6.36532e-10	9.64308e-09	10762	ENSG00000093000	NUP50	nucleoporin 50	-0.0148529	0.901226	YES
57153	5667.48	5859.33	5722.59	4449.01	4640.28	4783.54	5187.04	-0.310562	0.0468766	-6.6251	3.47014e-11	6.11454e-10	57153	ENSG00000129353	SLC44A2	solute carrier family 44 member 2	0.412983	3.60545e-07	YES
4825	355.64	363.526	354.715	273.891	319.95	256.204	320.654	-0.310496	0.109988	-2.823	0.0047576	0.0182275	4825	ENSG00000163623	NKX6-1	NK6 homeobox 1	-1.8049	3.50601e-23
54881	1631.83	1631.41	1604.25	1327.24	1217.81	1360.02	1462.09	-0.310379	0.0636826	-4.87384	1.09451e-06	1.00278e-05	54881	ENSG00000136891	TEX10	testis expressed 10	-0.371935	8.83157e-07	YES
400765	14.0955	15.3831	16.0747	7.85351	8.9986	7.47262	11.6463	-0.310063	0.194988	-1.59016	0.111798	0.238088	400765	ENSG00000225206	MIR137HG	MIR137 host gene	-0.102321	0.812466
158046	60.7191	38.8625	42.8658	37.3042	29.9953	33.093	40.4733	-0.309857	0.198114	-1.56403	0.11781	0.248015	158046	ENSG00000130045	NXNL2	nucleoredoxin like 2	0.820251	0.000128427
258010	666.826	621.8	654.776	495.753	533.917	520.948	582.336	-0.309856	0.0847462	-3.65628	0.000255899	0.00141455	258010	ENSG00000198168	SVIP	small VCP interacting protein	0.168416	0.201596	YES	YES
201965	598.517	544.075	559.399	469.247	457.929	428.074	509.54	-0.309726	0.0901403	-3.43604	0.000590282	0.00295642	201965	ENSG00000182552	RWDD4	RWD domain containing 4	-0.227569	0.0574522	YES
10026	2009.15	1916.41	2025.41	1718.94	1379.79	1667.46	1786.19	-0.309316	0.0731253	-4.22994	2.33749e-05	0.000167755	10026	ENSG00000142892	PIGK	phosphatidylinositol glycan anchor biosynthesis class K	-0.0725435	0.500684	YES
286826	382.747	356.239	359.001	274.873	274.957	321.322	328.19	-0.309087	0.107694	-2.87005	0.00410406	0.0159793	286826	ENSG00000183814	LIN9	lin-9 DREAM MuvB core complex component	0.483478	8.64861e-09
80145	1234.98	1136.73	1218.46	952.238	950.852	973.575	1077.81	-0.309029	0.0684966	-4.51159	6.43437e-06	5.19527e-05	80145	ENSG00000163634	THOC7	THO complex 7	0.192834	0.195757	YES
145508	299.258	277.705	282.914	227.752	241.962	209.233	256.471	-0.308686	0.116137	-2.65795	0.00786185	0.0277118	145508	ENSG00000100629	CEP128	centrosomal protein 128	-0.160263	0.375605	YES
196549	8.67416	17.0023	9.64481	7.85351	4.99922	2.13503	8.38484	-0.308659	0.178762	-1.72665	0.0842311	0.191049	196549	NA	EEF1DP3	eukaryotic translation elongation factor 1 delta pseudogene 3	0.356855	0.186965
60592	3361.24	3024.8	3060.62	2570.06	2384.63	2636.77	2839.68	-0.308203	0.0592283	-5.20365	1.95411e-07	2.05324e-06	60592	ENSG00000153130	SCOC	short coiled-coil protein	-0.0169948	0.900454	YES
1073	3500.02	3052.32	3237.44	2658.41	2455.62	2748.86	2942.11	-0.308129	0.06171	-4.99317	5.93959e-07	5.74763e-06	1073	ENSG00000165410	CFL2	cofilin 2	-0.127345	0.134702	YES
25825	4235.16	4363.93	4463.4	3444.75	3549.45	3526.01	3930.45	-0.308105	0.0475938	-6.47363	9.56764e-11	1.61526e-09	25825	ENSG00000182240	BACE2	beta-secretase 2	-0.363876	0.000488231
8027	1655.68	1447.63	1534.6	1226.13	1154.82	1336.53	1392.56	-0.308087	0.0719314	-4.28307	1.84334e-05	0.000135348	8027	ENSG00000136738	STAM	signal transducing adaptor molecule	0.510035	3.67502e-07	YES
11222	2854.88	2636.98	2808.78	2213.71	2219.65	2240.72	2495.79	-0.308072	0.0541501	-5.68923	1.27611e-08	1.63754e-07	11222	ENSG00000114686	MRPL3	mitochondrial ribosomal protein L3	0.190259	0.0369291	YES
79788	17.3483	12.1445	19.2896	9.81689	11.9981	3.20255	12.3	-0.307934	0.192692	-1.59806	0.110029	0.235198	79788	ENSG00000197497	ZNF665	zinc finger protein 665	-0.013161	NA
5612	1876.87	1833.82	1845.37	1563.83	1436.78	1464.63	1670.22	-0.307911	0.0599686	-5.13453	2.82847e-07	2.8893e-06	5612	ENSG00000137492	THAP12	THAP domain containing 12	0.201249	0.00759875	YES
10678	1152.58	1196.64	1110.22	956.165	894.861	927.672	1039.69	-0.307815	0.0695142	-4.42809	9.50707e-06	7.38406e-05	10678	ENSG00000170340	B3GNT2	UDP-GlcNAc:betaGal beta-1,3-N-acetylglucosaminyltransferase 2	-0.298669	0.0484076	YES
152579	464.067	447.728	464.023	373.042	328.949	393.914	411.954	-0.3075	0.0991585	-3.10109	0.00192807	0.00831823	152579	ENSG00000184178	SCFD2	sec1 family domain containing 2	-0.0876003	0.64884	YES
1303	3655.07	3613.4	3870.78	2986.3	2809.56	3167.32	3350.41	-0.30746	0.0560669	-5.48381	4.16263e-08	4.91428e-07	1303	ENSG00000111799	COL12A1	collagen type XII alpha 1 chain	-0.943968	4.87133e-10	YES
3945	15869.4	14776.6	15893.6	12683.4	12100.1	12719.5	14007.1	-0.307409	0.0449574	-6.83778	8.04301e-12	1.54755e-10	3945	ENSG00000111716	LDHB	lactate dehydrogenase B	0.131157	0.433648	YES
374860	72.6461	61.5323	56.7972	53.0112	42.9933	44.8357	55.3026	-0.307352	0.186768	-1.64564	0.0998379	0.218349	374860	ENSG00000180777	ANKRD30B	ankyrin repeat domain 30B	1.46252	4.24351e-08
85480	23.8539	20.2409	22.5046	16.6887	15.9975	7.47262	17.793	-0.307239	0.202669	-1.51596	0.129529	0.265089	85480	ENSG00000145777	TSLP	thymic stromal lymphopoietin	-0.488057	0.160121
11167	35918.6	35860.4	35789.8	30075	27907.7	28776	32387.9	-0.307093	0.0405311	-7.57673	3.5437e-14	8.98318e-13	11167	ENSG00000163430	FSTL1	follistatin like 1	0.169927	0.209729	YES
29958	29.2753	20.2409	18.218	12.762	13.9978	14.9452	18.2399	-0.306913	0.203398	-1.50893	0.131317	0.267918	29958	ENSG00000132837	DMGDH	dimethylglycine dehydrogenase	-0.686775	0.0342447
78991	709.112	731.91	725.504	554.654	593.908	588.202	650.548	-0.306906	0.0805123	-3.81192	0.000137894	0.000817472	78991	ENSG00000145882	PCYOX1L	prenylcysteine oxidase 1 like	-0.0638497	0.72927
3344	328.534	306.852	323.637	235.605	255.96	269.014	286.6	-0.306904	0.111248	-2.75874	0.00580246	0.0215512	3344	ENSG00000170802	FOXN2	forkhead box N2	-0.0192393	0.939984
51651	1236.07	1198.26	1278.47	1016.05	1034.84	927.672	1115.23	-0.306883	0.069821	-4.39528	1.10628e-05	8.45722e-05	51651	ENSG00000141378	PTRH2	peptidyl-tRNA hydrolase 2	0.231894	0.0606606	YES
3298	633.213	603.178	623.698	528.149	449.93	508.138	557.718	-0.30676	0.0890356	-3.44537	0.000570288	0.00286583	3298	ENSG00000025156	HSF2	heat shock transcription factor 2	0.565099	4.45554e-07	YES
6484	937.893	893.837	933.403	727.432	766.881	722.709	830.359	-0.306729	0.0740448	-4.14248	3.43575e-05	0.000236313	6484	ENSG00000110080	ST3GAL4	ST3 beta-galactoside alpha-2,3-sialyltransferase 4	0.400215	0.000185586
55617	253.719	246.939	236.834	223.825	181.972	175.073	219.727	-0.306238	0.12663	-2.41838	0.0155899	0.0489912	55617	ENSG00000089123	TASP1	taspase 1	-0.0221617	0.916012
219902	824.045	740.816	785.516	634.171	656.898	589.269	705.119	-0.306157	0.0817389	-3.74555	0.000179997	0.0010355	219902	ENSG00000181264	TLCD5	TLC domain containing 5	0.219585	0.154361
130271	479.247	421.01	441.518	427.035	257.96	372.563	399.889	-0.306028	0.125721	-2.43418	0.0149255	0.0472719	130271	ENSG00000152527	PLEKHH2	pleckstrin homology, MyTH4 and FERM domain containing H2	0.121873	0.650403	YES	YES
9718	280.826	289.04	266.84	201.246	240.963	220.976	249.982	-0.306003	0.118316	-2.58631	0.0097009	0.0330727	9718	ENSG00000145194	ECE2	endothelin converting enzyme 2	0.0112771	0.968899
29781	2034.09	2145.53	2130.43	1686.54	1780.72	1614.09	1898.57	-0.305858	0.059574	-5.13409	2.83511e-07	2.8943e-06	29781	ENSG00000025770	NCAPH2	non-SMC condensin II complex subunit H2	0.343987	6.45011e-06	YES
115353	1951.69	1808.72	1802.51	1553.03	1502.77	1418.73	1672.91	-0.30553	0.0626085	-4.88	1.06084e-06	9.74091e-06	115353	ENSG00000116212	LRRC42	leucine rich repeat containing 42	-0.188554	0.152775	YES
5581	606.107	563.506	588.334	477.101	453.929	475.045	527.337	-0.305426	0.08741	-3.49418	0.000475524	0.00243855	5581	ENSG00000171132	PRKCE	protein kinase C epsilon	-0.287465	0.217611	YES
59339	4056.25	4121.04	4206.21	3412.35	3208.5	3369.08	3728.91	-0.305392	0.048929	-6.24153	4.33307e-10	6.69317e-09	59339	ENSG00000169499	PLEKHA2	pleckstrin homology domain containing A2	-0.2542	0.112527	YES	YES
51460	885.848	911.649	913.042	740.194	693.892	744.059	814.781	-0.305193	0.0744463	-4.0995	4.14042e-05	0.000278976	51460	ENSG00000163935	SFMBT1	Scm like with four mbt domains 1	0.0815687	0.477508	YES
340277	233.118	232.365	231.475	210.081	153.976	184.68	207.616	-0.305146	0.130341	-2.34114	0.0192252	0.0581101	340277	ENSG00000188732	FAM221A	family with sequence similarity 221 member A	0.0535527	0.869689
2064	4427.07	4648.11	4519.13	3573.35	3783.41	3618.88	4094.99	-0.304726	0.0484455	-6.29008	3.17312e-10	5.02349e-09	2064	ENSG00000141736	ERBB2	erb-b2 receptor tyrosine kinase 2	-0.0905642	0.379707	YES
1662	1076.68	955.369	1018.06	817.747	794.876	835.865	916.434	-0.304512	0.0741956	-4.10418	4.05758e-05	0.000273841	1662	ENSG00000178105	DDX10	DEAD-box helicase 10	0.135061	0.159237	YES
482	91.0786	126.303	111.451	88.352	72.9886	91.8064	96.9967	-0.30445	0.166164	-1.83223	0.0669175	0.159621	482	ENSG00000129244	ATP1B2	ATPase Na+/K+ transporting subunit beta 2	0.281714	0.313841	YES	YES
113263	187.579	201.599	192.896	171.796	131.979	153.722	173.262	-0.304346	0.136423	-2.23091	0.0256873	0.0740683	113263	ENSG00000106415	GLCCI1	glucocorticoid induced 1	0.162707	0.495197	YES	YES
378805	287.331	309.281	346.142	262.111	255.96	229.516	281.723	-0.304223	0.115311	-2.63828	0.00833283	0.0291605	378805	ENSG00000231721	LINC-PINT	long intergenic non-protein coding RNA, p53 induced transcript	0.00262798	0.994559
881	109.511	121.445	124.311	87.3703	97.9848	89.6714	105.049	-0.303817	0.157203	-1.93264	0.0532802	0.133103	881	ENSG00000185972	CCIN	calicin	0.0242823	0.957696
340252	317.691	313.329	331.139	271.928	227.965	264.744	287.799	-0.303559	0.112577	-2.69647	0.00700783	0.0251303	340252	ENSG00000173041	ZNF680	zinc finger protein 680	0.691086	4.12102e-06
6447	33.6124	54.2455	37.5076	23.5605	35.9944	28.8229	35.6239	-0.303413	0.201492	-1.50583	0.132111	0.269006	6447	ENSG00000166922	SCG5	secretogranin V	-0.461219	0.140741
57415	645.14	628.277	624.769	498.698	506.921	517.746	570.259	-0.303407	0.0838194	-3.61977	0.000294864	0.0016005	57415	ENSG00000114405	C3orf14	chromosome 3 open reading frame 14	0.384247	0.000891372
55540	212.517	219.411	223.974	173.759	159.975	184.68	195.719	-0.303334	0.127458	-2.37987	0.0173188	0.0533343	55540	ENSG00000056736	IL17RB	interleukin 17 receptor B	0.292085	0.157589
10196	511.775	483.352	438.303	370.097	382.94	393.914	430.064	-0.303081	0.0971216	-3.12063	0.00180462	0.007845	10196	ENSG00000185238	PRMT3	protein arginine methyltransferase 3	0.184382	0.0857988	YES
29105	1816.15	1628.99	1721.06	1425.41	1392.78	1341.87	1554.38	-0.303076	0.0636885	-4.75873	1.94815e-06	1.72464e-05	29105	ENSG00000070761	CFAP20	cilia and flagella associated protein 20	0.185364	0.142026	YES
90233	342.629	274.466	322.565	242.477	228.964	272.217	280.553	-0.303043	0.118771	-2.55149	0.0107262	0.0358219	90233	ENSG00000204519	ZNF551	zinc finger protein 551	-0.127086	0.542423
148641	281.91	234.794	270.055	180.631	211.967	228.449	234.634	-0.302892	0.12588	-2.40619	0.0161199	0.0502602	148641	ENSG00000183780	SLC35F3	solute carrier family 35 member F3	0.334684	0.0315923
27258	2094.81	1876.73	2128.29	1640.4	1683.74	1588.46	1835.41	-0.302773	0.0634974	-4.76827	1.85817e-06	1.65029e-05	27258	ENSG00000170860	LSM3	LSM3 homolog, U6 small nuclear RNA and mRNA degradation associated	0.591104	0.000167224
2697	30172	30600.2	30576.2	25723.2	24181.2	24009.5	27543.7	-0.302413	0.0410035	-7.37531	1.63963e-13	3.86038e-12	2697	ENSG00000152661	GJA1	gap junction protein alpha 1	-0.951325	0.000306719
376267	1756.52	1755.29	1789.65	1444.06	1445.78	1388.84	1596.69	-0.302293	0.0587264	-5.14749	2.63996e-07	2.71014e-06	376267	ENSG00000139998	RAB15	RAB15, member RAS oncogene family	-0.219449	0.119134
22948	13862.4	13081.3	13504.9	10796.6	10916.3	11015.7	12196.2	-0.302206	0.0411772	-7.33917	2.14919e-13	4.98203e-12	22948	ENSG00000150753	CCT5	chaperonin containing TCP1 subunit 5	0.301813	0.00778968	YES
55859	32.5281	28.3372	34.2927	20.6155	16.9974	26.6879	26.5765	-0.301974	0.204108	-1.47948	0.139011	0.279159	55859	ENSG00000133169	BEX1	brain expressed X-linked 1	-0.581579	0.0557689
87178	1049.57	1036.33	1067.36	863.886	807.874	868.958	948.997	-0.301746	0.0707449	-4.26527	1.99663e-05	0.000145504	87178	ENSG00000138035	PNPT1	polyribonucleotide nucleotidyltransferase 1	-0.220892	0.0153801	YES
124359	955.241	877.644	1008.42	751.974	744.884	786.76	854.154	-0.301716	0.0772888	-3.90375	9.47129e-05	0.000586737	124359	ENSG00000166446	CDYL2	chromodomain Y like 2	-1.64706	5.37463e-18
51495	8060.46	7783.83	7786.58	6346.62	6393.01	6389.09	7126.6	-0.30154	0.0420008	-7.17937	7.00331e-13	1.51904e-11	51495	ENSG00000074696	HACD3	3-hydroxyacyl-CoA dehydratase 3	0.196358	0.0388332	YES
308	22017.2	21221.3	22470.3	17727.3	17391.3	18080.5	19818	-0.301519	0.0407161	-7.4054	1.30753e-13	3.11396e-12	308	ENSG00000164111	ANXA5	annexin A5	-0.321788	0.00431764	YES
1512	790.432	817.731	851.958	631.226	688.893	659.725	739.994	-0.301494	0.0783011	-3.85045	0.000117903	0.000713811	1512	ENSG00000103811	CTSH	cathepsin H	0.761893	4.34342e-07	YES	YES
157567	401.18	391.054	419.013	333.774	290.955	342.673	363.108	-0.301445	0.103563	-2.91075	0.00360563	0.014322	157567	ENSG00000186106	ANKRD46	ankyrin repeat domain 46	-0.0644128	0.749083	YES
7064	4585.38	4598.73	4685.24	3530.15	3978.38	3706.42	4180.71	-0.301316	0.052469	-5.74274	9.31566e-09	1.22587e-07	7064	ENSG00000172009	THOP1	thimet oligopeptidase 1	-0.0627119	0.528278	YES
8792	134.449	148.163	147.887	98.1689	123.981	114.224	127.812	-0.301193	0.149576	-2.01365	0.0440463	0.114375	8792	ENSG00000141655	TNFRSF11A	TNF receptor superfamily member 11a	0.0262048	0.932846
9481	48.7921	51.8166	46.0808	38.2859	29.9953	38.4306	42.2336	-0.301083	0.195018	-1.54387	0.122619	0.255277	9481	ENSG00000153291	SLC25A27	solute carrier family 25 member 27	0.857914	0.000568399
29081	1019.21	1016.09	1066.29	828.546	815.873	856.148	933.693	-0.300914	0.0707135	-4.2554	2.0868e-05	0.000151474	29081	ENSG00000138382	METTL5	methyltransferase like 5	0.116281	0.49858
55853	11.927	13.7638	24.6479	14.7253	6.99891	4.27007	12.7222	-0.300756	0.191818	-1.56793	0.116898	0.246315	55853	ENSG00000232656	IDI2-AS1	IDI2 antisense RNA 1	0.000859714	NA
8682	32345.9	31034.9	31673.6	25178.4	26399.9	25433.6	28677.7	-0.300732	0.0395599	-7.60193	2.91743e-14	7.51079e-13	8682	ENSG00000162734	PEA15	proliferation and apoptosis adaptor protein 15	0.385867	0.000163726	YES
7710	14.0955	30.7661	52.5106	22.5788	16.9974	22.4178	26.5611	-0.300319	0.20413	-1.47121	0.141233	0.282433	7710	ENSG00000179909	ZNF154	zinc finger protein 154	NA	NA
6432	3278.83	3189.15	3184.93	2608.35	2575.6	2631.43	2911.38	-0.299965	0.0495632	-6.05217	1.42906e-09	2.08101e-08	6432	ENSG00000115875	SRSF7	serine and arginine rich splicing factor 7	0.0739475	0.599713	YES
100506123	1.08427	13.7638	24.6479	4.90845	6.99891	1.06752	8.74513	-0.299826	0.163492	-1.83388	0.0666714	0.159149	100506123	NA	LOC100506123	uncharacterized LOC100506123	-0.0446531	0.878859
23404	973.674	955.369	1006.28	823.637	776.879	765.409	883.541	-0.299777	0.0728581	-4.11453	3.87969e-05	0.000263125	23404	ENSG00000130713	EXOSC2	exosome component 2	-0.342882	0.00100943	YES
54873	76.9831	64.7708	68.5853	55.9563	43.9932	57.6459	61.3224	-0.299695	0.182891	-1.63865	0.101286	0.220793	54873	ENSG00000099260	PALMD	palmdelphin	-0.0272536	0.954916	YES	YES
4173	13300.7	12402	12639	10410.8	10418.4	10247.1	11569.7	-0.299512	0.0426606	-7.0208	2.20604e-12	4.50697e-11	4173	ENSG00000104738	MCM4	minichromosome maintenance complex component 4	0.054572	0.491582	YES
5810	1544	1450.06	1514.24	1156.43	1238.81	1246.86	1358.4	-0.299322	0.0643895	-4.64862	3.34165e-06	2.83235e-05	5810	ENSG00000113456	RAD1	RAD1 checkpoint DNA exonuclease	0.407589	1.70915e-06
58477	2214.08	2160.11	2194.73	1772.93	1807.72	1734.71	1980.71	-0.29932	0.0551035	-5.43196	5.57394e-08	6.4289e-07	58477	ENSG00000144867	SRPRB	SRP receptor subunit beta	-0.174154	0.168618	YES
92999	1262.09	1262.22	1287.05	1016.05	1083.83	977.845	1148.18	-0.299249	0.0675229	-4.43182	9.34414e-06	7.26434e-05	92999	ENSG00000114853	ZBTB47	zinc finger and BTB domain containing 47	-0.0543454	0.760127
80021	736.219	710.05	728.719	546.801	612.905	591.404	654.35	-0.299246	0.0819039	-3.65363	0.000258564	0.00142641	80021	ENSG00000137842	TMEM62	transmembrane protein 62	0.0879864	0.597876	YES	YES
1933	8855.23	8185.41	8834.65	6641.13	7524.83	6780.87	7803.68	-0.299013	0.0542573	-5.51101	3.56779e-08	4.24845e-07	1933	ENSG00000114942	EEF1B2	eukaryotic translation elongation factor 1 beta 2	0.185895	0.177061	YES
4862	177.82	225.079	217.544	177.686	151.976	161.195	185.217	-0.298798	0.135016	-2.21306	0.0268934	0.0767825	4862	ENSG00000170485	NPAS2	neuronal PAS domain protein 2	-0.867793	0.00701758	YES
337876	162.64	216.173	168.248	148.235	144.977	138.777	163.175	-0.2987	0.142102	-2.10201	0.0355524	0.0961652	337876	ENSG00000198108	CHSY3	chondroitin sulfate synthase 3	-1.85259	5.63828e-14
9891	3711.45	3747.8	3946.87	3069.74	3086.52	3087.26	3441.61	-0.298611	0.0492354	-6.06496	1.31985e-09	1.9322e-08	9891	ENSG00000074590	NUAK1	NUAK family kinase 1	-0.295062	0.00410707	YES
8854	11.927	9.71562	5.35823	4.90845	2.99953	1.06752	5.99605	-0.298474	0.164163	-1.81815	0.0690407	0.163529	8854	ENSG00000128918	ALDH1A2	aldehyde dehydrogenase 1 family member A2	-0.473089	0.0862629	YES
84222	108.427	95.5369	112.523	69.6999	100.984	71.5236	93.1158	-0.298345	0.168824	-1.76719	0.0771967	0.178349	84222	ENSG00000226287	TMEM191A	transmembrane protein 191A (pseudogene)	0.0371508	0.918389
140885	15492	15349.9	15618.2	12431.1	12480.1	12799.5	14028.5	-0.298288	0.0386833	-7.71102	1.2482e-14	3.34906e-13	140885	ENSG00000198053	SIRPA	signal regulatory protein alpha	-0.520712	6.35082e-10	YES	YES
23189	1463.76	1479.2	1416.72	1159.37	1179.82	1190.28	1314.86	-0.29816	0.0625028	-4.77035	1.83909e-06	1.63774e-05	23189	ENSG00000107104	KANK1	KN motif and ankyrin repeat domains 1	-0.382071	0.0135211
692086	78.0674	60.7226	67.5137	52.0295	47.9925	54.4433	60.1282	-0.298151	0.183209	-1.62739	0.103655	0.224951	692086	ENSG00000212232	SNORD17	small nucleolar RNA, C/D box 17	0.181707	0.581906
9209	1542.92	1330.23	1416.72	1192.75	1092.83	1176.4	1291.97	-0.298081	0.0710886	-4.19309	2.7518e-05	0.000193607	9209	ENSG00000093167	LRRFIP2	LRR binding FLII interacting protein 2	-0.0938047	0.379076
25945	2864.64	2630.5	2748.77	2287.34	2127.67	2258.87	2486.3	-0.298057	0.056496	-5.27573	1.32231e-07	1.42658e-06	25945	ENSG00000177707	NECTIN3	nectin cell adhesion molecule 3	-0.251904	0.0826112	YES
55111	2725.85	2582.74	2592.31	2081.18	2259.65	2056.04	2382.96	-0.297992	0.0572084	-5.20889	1.89973e-07	2.00062e-06	55111	ENSG00000104886	PLEKHJ1	pleckstrin homology domain containing J1	-0.161774	0.338029	YES
2793	13.0112	15.3831	15.003	7.85351	6.99891	8.54013	11.1316	-0.297916	0.193602	-1.53881	0.123851	0.257162	2793	ENSG00000167083	GNGT2	G protein subunit gamma transducin 2	0.182889	0.647484
3008	20.6011	4.04818	43.9375	6.87182	13.9978	12.8102	17.0444	-0.297886	0.187832	-1.58592	0.112758	0.239792	3008	ENSG00000168298	H1-4	H1.4 linker histone, cluster member	0.403941	0.229075
26586	3307.02	2905.78	3040.26	2508.22	2266.65	2706.15	2789.01	-0.297854	0.0668687	-4.45431	8.41641e-06	6.61152e-05	26586	ENSG00000136108	CKAP2	cytoskeleton associated protein 2	0.349788	1.96856e-05
348110	1630.74	1587.69	1699.63	1326.26	1342.79	1309.84	1482.83	-0.297766	0.0611277	-4.87122	1.10913e-06	1.01561e-05	348110	ENSG00000242498	ARPIN	actin related protein 2/3 complex inhibitor	0.216981	0.0995274	YES
64949	1611.22	1480.82	1516.38	1178.03	1395.78	1144.38	1387.77	-0.297764	0.0752218	-3.95848	7.54288e-05	0.000476411	64949	ENSG00000125901	MRPS26	mitochondrial ribosomal protein S26	0.0659426	0.683251	YES
79613	543.219	540.027	560.471	430.961	420.935	470.775	494.398	-0.297626	0.0904268	-3.29135	0.000997095	0.00468049	79613	ENSG00000103047	TANGO6	transport and golgi organization 6 homolog	-0.149695	0.286551
56953	199.506	192.693	192.896	148.235	157.975	156.925	174.705	-0.297582	0.131527	-2.26252	0.0236653	0.0693019	56953	ENSG00000205309	NT5M	5',3'-nucleotidase, mitochondrial	0.538796	0.00830402	YES
3320	58932.2	53461.8	55677.4	45412.9	44221.1	46772.2	50746.3	-0.297441	0.0448817	-6.62722	3.42071e-11	6.04034e-10	3320	ENSG00000080824	HSP90AA1	heat shock protein 90 alpha family class A member 1	-0.0279486	0.782153	YES
51012	2219.5	1878.35	2050.06	1701.27	1459.77	1799.83	1851.46	-0.297434	0.0765288	-3.88656	0.000101675	0.000624949	51012	ENSG00000101166	PRELID3B	PRELI domain containing 3B	0.282101	0.00408365	YES
124930	699.354	783.727	682.638	556.618	631.902	558.311	652.092	-0.297427	0.0876432	-3.39361	0.000689769	0.00339503	124930	ENSG00000198720	ANKRD13B	ankyrin repeat domain 13B	-0.286911	0.227209
101927204	312.27	305.232	307.562	248.367	235.963	255.136	277.422	-0.297251	0.110868	-2.68112	0.0073377	0.0261261	101927204	ENSG00000245571	FAM111A-DT	FAM111A divergent transcript	-0.160961	0.520648
5954	26360.8	26790.8	26338.9	21977.1	20684.8	21916.1	24011.4	-0.296846	0.0404415	-7.34012	2.13405e-13	4.95388e-12	5954	ENSG00000049449	RCN1	reticulocalbin 1	-0.248667	0.000421523	YES
222236	7.58989	9.71562	20.3613	0	5.99907	8.54013	8.701	-0.296828	0.171076	-1.73506	0.0827295	0.188315	222236	ENSG00000161048	NAPEPLD	N-acyl phosphatidylethanolamine phospholipase D	-0.0965285	0.772313	YES
4830	2127.34	1995.75	2159.37	1775.88	1631.75	1679.2	1894.88	-0.296583	0.0603076	-4.91783	8.75085e-07	8.19456e-06	4830	ENSG00000239672	NME1	NME/NM23 nucleoside diphosphate kinase 1	0.190018	0.282814	YES
4172	7154.01	7190.37	7309.7	5809.64	5989.07	5794.48	6541.21	-0.296258	0.0426012	-6.95422	3.54519e-12	7.09381e-11	4172	ENSG00000112118	MCM3	minichromosome maintenance complex component 3	0.222385	0.0176216
79768	658.152	619.371	615.125	529.13	452.93	542.298	569.501	-0.296002	0.0904559	-3.27234	0.00106662	0.00497857	79768	ENSG00000134152	KATNBL1	katanin regulatory subunit B1 like 1	0.0065943	0.968059	YES
4839	2080.71	2156.06	2175.44	1654.15	1843.71	1701.62	1935.28	-0.295998	0.0599785	-4.93508	8.01199e-07	7.55403e-06	4839	ENSG00000111641	NOP2	NOP2 nucleolar protein	-0.18086	0.0960213	YES
23659	1490.87	1525.35	1385.64	1194.72	1182.82	1191.35	1328.46	-0.295968	0.0646733	-4.57635	4.73153e-06	3.91797e-05	23659	ENSG00000103066	PLA2G15	phospholipase A2 group XV	0.0690591	0.607422	YES	YES
4595	419.612	412.104	386.864	328.866	344.946	304.242	366.106	-0.295958	0.101816	-2.9068	0.00365144	0.0144796	4595	ENSG00000132781	MUTYH	mutY DNA glycosylase	-0.199927	0.288294
79980	2203.24	2166.58	2162.58	1790.6	1677.74	1830.79	1971.92	-0.295893	0.0574271	-5.15249	2.57044e-07	2.64205e-06	79980	ENSG00000149636	DSN1	DSN1 component of MIS12 kinetochore complex	0.541631	6.85392e-08
692227	110.595	121.445	158.604	91.2971	120.981	89.6714	115.432	-0.295783	0.162894	-1.81581	0.0694002	0.164109	692227	ENSG00000199753	SNORD104	small nucleolar RNA, C/D box 104	0.108458	0.747839
729830	189.747	213.744	226.117	150.198	166.974	182.545	188.221	-0.295579	0.132665	-2.228	0.0258803	0.074469	729830	ENSG00000164142	FAM160A1	family with sequence similarity 160 member A1	-0.396949	0.0286674	YES
143244	472.741	399.96	404.01	315.122	374.942	331.998	383.129	-0.295574	0.106224	-2.78256	0.00539313	0.0202869	143244	ENSG00000253626	EIF5AL1	eukaryotic translation initiation factor 5A like 1	-0.221838	0.287836
102724224	116.017	114.159	96.4481	83.4436	90.9859	78.9962	96.6749	-0.295573	0.162217	-1.82209	0.0684416	0.162365	102724224	ENSG00000224577	LINC01117	long intergenic non-protein coding RNA 1117	0.0504767	0.906228
7222	48.7921	53.4359	34.2927	40.2492	27.9956	29.8905	39.1093	-0.295361	0.199263	-1.48227	0.138269	0.278063	7222	ENSG00000138741	TRPC3	transient receptor potential cation channel subfamily C member 3	0.106408	0.724842
100287616	274.32	247.748	273.27	213.027	204.968	215.638	238.162	-0.295274	0.118496	-2.49185	0.0127079	0.041354	100287616	ENSG00000261801	LOXL1-AS1	LOXL1 antisense RNA 1	-0.21393	0.1104
9882	1087.52	1055.76	1075.93	844.253	852.867	909.524	970.977	-0.295241	0.0702206	-4.20447	2.61692e-05	0.000184918	9882	ENSG00000136111	TBC1D4	TBC1 domain family member 4	0.102258	0.363969	YES
153396	575.747	558.648	475.811	484.954	385.94	422.737	483.973	-0.295073	0.102706	-2.87299	0.0040661	0.0158801	153396	ENSG00000164180	TMEM161B	transmembrane protein 161B	0.225444	0.0738013	YES
55092	2811.51	3229.63	2897.73	2400.23	2577.6	2274.88	2698.6	-0.294941	0.0640535	-4.60459	4.1327e-06	3.45849e-05	55092	ENSG00000171729	TMEM51	transmembrane protein 51	-1.12188	8.26643e-29
54984	456.477	359.478	417.942	289.598	330.949	365.091	369.922	-0.294865	0.112656	-2.61741	0.00886009	0.0306551	54984	ENSG00000254093	PINX1	PIN2 (TERF1) interacting telomerase inhibitor 1	-0.158618	0.186407
121273	8.67416	5.66745	13.9314	1.96338	3.99938	4.27007	6.41764	-0.294833	0.167932	-1.75567	0.0791453	0.18196	121273	ENSG00000177627	C12orf54	chromosome 12 open reading frame 54	-0.0422399	NA
255488	2616.34	2700.13	2675.9	2313.84	2009.69	2164.92	2413.47	-0.294443	0.0593805	-4.95859	7.10083e-07	6.78004e-06	255488	ENSG00000137393	RNF144B	ring finger protein 144B	-0.379738	0.00037205	YES
84321	1407.38	1398.24	1133.8	1087.71	1063.83	1036.56	1187.92	-0.294345	0.0794071	-3.70679	0.000209907	0.00118858	84321	ENSG00000051596	THOC3	THO complex 3	-0.00646923	0.982039	YES
8836	3785.18	3417.47	3662.89	3026.55	2841.56	2953.82	3281.24	-0.294213	0.0545576	-5.39271	6.94031e-08	7.8784e-07	8836	ENSG00000137563	GGH	gamma-glutamyl hydrolase	0.271731	0.0417047	YES	YES
25929	989.938	804.777	1030.92	736.267	756.882	782.49	850.213	-0.294208	0.0879139	-3.34655	0.000818244	0.00393214	25929	ENSG00000082516	GEMIN5	gem nuclear organelle associated protein 5	-0.133307	0.322665	YES
23240	546.472	531.121	602.265	451.577	419.935	481.45	505.47	-0.294091	0.0931664	-3.15662	0.00159607	0.00707236	23240	ENSG00000121210	TMEM131L	transmembrane 131 like	-0.562942	0.000930923
55632	594.18	561.077	512.247	451.577	417.935	475.045	502.01	-0.294083	0.0936561	-3.14003	0.00168928	0.00742607	55632	ENSG00000092140	G2E3	G2/M-phase specific E3 ubiquitin protein ligase	-0.203883	0.110895	YES
2331	62.8876	52.6263	82.5167	50.0661	47.9925	49.1058	57.5325	-0.293795	0.187554	-1.56646	0.117242	0.246913	2331	ENSG00000122176	FMOD	fibromodulin	-0.0314113	NA
2068	3279.92	3344.6	3492.49	2584.79	2844.56	2793.69	3056.67	-0.293658	0.0547131	-5.36723	7.99556e-08	8.95329e-07	2068	ENSG00000104884	ERCC2	ERCC excision repair 2, TFIIH core complex helicase subunit	-0.173282	0.0687813	YES
25923	4710.07	4482.95	4712.03	3892.4	3482.46	3924.19	4200.68	-0.29364	0.0548745	-5.35113	8.74082e-08	9.73506e-07	25923	ENSG00000184743	ATL3	atlastin GTPase 3	-0.208173	0.293015	YES
6453	2450.45	2253.21	2328.69	1941.78	1860.71	1907.65	2123.75	-0.293619	0.0568484	-5.16495	2.40506e-07	2.48287e-06	6453	ENSG00000205726	ITSN1	intersectin 1	0.0404439	0.786839	YES
6397	5311.84	5038.36	5499.69	4178.07	4290.33	4418.45	4789.46	-0.293606	0.0498788	-5.88639	3.94714e-09	5.41846e-08	6397	ENSG00000129657	SEC14L1	SEC14 like lipid binding 1	-0.454524	1.19147e-06	YES
4809	3248.47	2995.65	3256.73	2407.1	2732.58	2574.85	2869.23	-0.29326	0.0594168	-4.93564	7.98881e-07	7.53879e-06	4809	ENSG00000100138	SNU13	small nuclear ribonucleoprotein 13	0.127477	0.320454	YES
10613	2930.78	2701.75	2894.52	2392.38	2236.65	2298.36	2575.74	-0.29299	0.0557896	-5.25169	1.50713e-07	1.61722e-06	10613	ENSG00000107566	ERLIN1	ER lipid raft associated 1	0.295154	0.00025544	YES
158880	199.506	170.023	159.675	133.51	132.979	151.587	157.88	-0.292852	0.140879	-2.07875	0.0376406	0.100586	158880	ENSG00000247746	USP51	ubiquitin specific peptidase 51	-1.67394	1.53931e-09
64781	2420.09	2450.77	2376.91	1901.53	2087.68	1903.38	2190.06	-0.292781	0.0575266	-5.08949	3.59027e-07	3.6205e-06	64781	ENSG00000100422	CERK	ceramide kinase	0.343593	8.61491e-05	YES	YES
814	315.522	328.712	347.213	274.873	253.961	266.879	297.86	-0.292774	0.10894	-2.68749	0.00719911	0.0257102	814	ENSG00000152495	CAMK4	calcium/calmodulin dependent protein kinase IV	0.135937	0.452214
26278	6134.8	6141.08	5925.13	5005.63	4213.34	5548.95	5494.82	-0.29256	0.0706112	-4.14325	3.42419e-05	0.000235714	26278	ENSG00000151835	SACS	sacsin molecular chaperone	-0.0953089	0.513328	YES
90441	2939.45	3033.7	2979.18	2389.43	2463.62	2436.07	2706.91	-0.292347	0.0506553	-5.7713	7.86605e-09	1.04342e-07	90441	ENSG00000173545	ZNF622	zinc finger protein 622	0.254814	0.0186211
908	12182.9	11777.8	11983.1	9704	9817.47	9769.91	10872.5	-0.292315	0.039623	-7.37741	1.61403e-13	3.80552e-12	908	ENSG00000146731	CCT6A	chaperonin containing TCP1 subunit 6A	0.233921	0.0225726
3355	7.58989	7.28672	5.35823	0.981689	2.99953	0	4.03601	-0.292257	0.144376	-2.02428	0.0429412	NA	3355	ENSG00000179097	HTR1F	5-hydroxytryptamine receptor 1F	-0.241798	NA
3553	3415.45	3462	3284.59	2879.29	2710.58	2681.6	3072.25	-0.292213	0.0523756	-5.57917	2.4167e-08	2.97418e-07	3553	ENSG00000125538	IL1B	interleukin 1 beta	-0.317928	NA
51003	458.646	464.73	528.321	394.639	397.938	376.833	436.851	-0.291808	0.0966906	-3.01796	0.00254482	0.010576	51003	ENSG00000108590	MED31	mediator complex subunit 31	0.359093	0.0282919	YES
26529	14.0955	20.2409	10.7165	10.7986	4.99922	8.54013	11.5651	-0.291767	0.192222	-1.51786	0.129049	0.2644	26529	ENSG00000280236	OR12D2	olfactory receptor family 12 subfamily D member 2	NA	NA
7274	10.8427	9.71562	6.42987	3.92676	3.99938	2.13503	6.17489	-0.291751	0.168506	-1.7314	0.0833806	0.189493	7274	ENSG00000137561	TTPA	alpha tocopherol transfer protein	0.446649	0.0897088
26031	4578.87	4387.41	4658.44	3908.1	3432.47	3744.85	4118.36	-0.291628	0.0551708	-5.28592	1.25077e-07	1.35558e-06	26031	ENSG00000070882	OSBPL3	oxysterol binding protein like 3	-0.00277825	0.989504
23223	2366.96	2316.37	2382.27	1773.91	1990.69	1982.38	2135.43	-0.291536	0.059627	-4.88932	1.01183e-06	9.37382e-06	23223	ENSG00000052749	RRP12	ribosomal RNA processing 12 homolog	0.0700019	0.556323	YES
647033	129.028	114.159	136.099	84.4253	108.983	102.482	112.529	-0.291323	0.157059	-1.85487	0.0636152	0.153136	647033	NA	PA2G4P4	proliferation-associated 2G4 pseudogene 4	-0.140393	0.610957
10383	18023.8	15815.4	18114	12863.1	14808.7	14584.4	15701.6	-0.291297	0.0600997	-4.8469	1.25407e-06	1.13824e-05	10383	ENSG00000188229	TUBB4B	tubulin beta 4B class IVb	-0.170364	0.0910099	YES
81490	783.927	479.304	570.116	498.698	489.924	420.602	540.428	-0.291239	0.172114	-1.69213	0.0906214	0.202431	81490	ENSG00000174915	PTDSS2	phosphatidylserine synthase 2	0.089009	0.790259	YES
83873	10.8427	9.71562	5.35823	3.92676	1.99969	3.20255	5.84092	-0.291236	0.165171	-1.76324	0.0778607	0.179607	83873	ENSG00000156097	GPR61	G protein-coupled receptor 61	0.0385052	NA
2288	4888.97	4896.67	4879.2	3799.14	4196.35	3953.01	4435.56	-0.291143	0.0497708	-5.84967	4.92537e-09	6.68362e-08	2288	ENSG00000004478	FKBP4	FKBP prolyl isomerase 4	0.267988	0.00973802	YES
100302240	21.6854	16.1927	18.218	11.7803	13.9978	7.47262	14.8911	-0.291123	0.200108	-1.45483	0.145716	0.288985	100302240	ENSG00000284458	MIR1304	microRNA 1304	0.0592437	0.891009
27293	287.331	314.948	283.986	231.679	211.967	267.947	266.31	-0.290926	0.118649	-2.452	0.0142065	0.0453904	27293	ENSG00000130768	SMPDL3B	sphingomyelin phosphodiesterase acid like 3B	-0.175411	0.597876
388962	847.899	746.483	847.672	572.325	761.882	635.172	735.239	-0.290827	0.0951154	-3.05762	0.00223104	0.00943567	388962	ENSG00000163170	BOLA3	bolA family member 3	0.20141	0.308487	YES
8348	9.75843	4.85781	10.7165	1.96338	1.99969	4.27007	5.5943	-0.290797	0.161728	-1.79806	0.0721673	0.169117	8348	ENSG00000274641	H2BC17	H2B clustered histone 17	0.404076	0.20735
93436	2344.19	2268.6	2360.84	1828.89	1921.7	1926.87	2108.51	-0.290738	0.0553505	-5.25267	1.49908e-07	1.60993e-06	93436	ENSG00000105676	ARMC6	armadillo repeat containing 6	0.223176	0.0170636	YES
134492	584.421	513.309	549.754	419.181	514.92	390.711	495.383	-0.290701	0.102741	-2.82945	0.00466287	0.017902	134492	ENSG00000170584	NUDCD2	NudC domain containing 2	0.205043	0.291606	YES
51715	2443.94	2320.41	2231.17	1913.31	1787.72	1991.99	2114.76	-0.290697	0.0606681	-4.79159	1.65465e-06	1.48148e-05	51715	ENSG00000112210	RAB23	RAB23, member RAS oncogene family	0.314476	0.00686076	YES
725	4.33708	9.71562	9.64481	2.94507	0.999845	3.20255	5.14083	-0.290582	0.157584	-1.84398	0.0651866	0.156281	725	ENSG00000123843	C4BPB	complement component 4 binding protein beta	-0.215568	NA
154791	72.6461	51.007	46.0808	41.2309	37.9941	45.9032	49.1437	-0.290479	0.193042	-1.50475	0.132389	0.269408	154791	ENSG00000164898	FMC1	formation of mitochondrial complex V assembly factor 1 homolog	0.576368	0.0487858	YES
27131	6019.86	5985.63	5969.07	4918.26	4886.24	4859.34	5439.73	-0.290397	0.0427667	-6.79026	1.11929e-11	2.10703e-10	27131	ENSG00000089006	SNX5	sorting nexin 5	0.0226109	0.881836	YES
166929	2294.31	2159.3	2132.57	1812.2	1714.73	1835.06	1991.36	-0.290237	0.0584082	-4.96911	6.72626e-07	6.46723e-06	166929	ENSG00000164023	SGMS2	sphingomyelin synthase 2	-0.497362	1.60652e-06
442075	495.511	462.302	455.449	401.511	373.942	365.091	425.634	-0.289958	0.0958948	-3.02371	0.00249699	0.0104139	442075	NA	EMC3-AS1	EMC3 antisense RNA 1	0.0270865	0.876493
114	7.58989	13.7638	5.35823	0.981689	3.99938	4.27007	5.99384	-0.289914	0.163132	-1.77717	0.0755399	0.175133	114	ENSG00000155897	ADCY8	adenylate cyclase 8	-0.115876	NA
55559	576.831	583.747	640.844	454.522	512.92	489.99	543.142	-0.289624	0.0897157	-3.22824	0.00124554	0.00569467	55559	ENSG00000213397	HAUS7	HAUS augmin like complex subunit 7	0.157853	0.301269	YES
6588	264.562	264.751	261.482	229.715	199.969	203.896	237.396	-0.289517	0.118969	-2.43355	0.0149515	0.0473407	6588	ENSG00000170290	SLN	sarcolipin	1.14411	3.8266e-12
8914	2963.31	2960.03	3077.77	2465.02	2500.61	2372.02	2723.13	-0.289485	0.0518966	-5.57812	2.43132e-08	2.98772e-07	8914	ENSG00000111602	TIMELESS	timeless circadian regulator	0.0362344	0.737976
813	29407.6	28748.5	28326.8	24306.6	22355.5	23939.1	26180.7	-0.289402	0.0433222	-6.68023	2.38564e-11	4.29052e-10	813	ENSG00000128595	CALU	calumenin	0.122607	0.170758	YES
55093	396.843	382.148	416.87	352.426	311.951	297.837	359.679	-0.289291	0.104369	-2.7718	0.00557477	0.020865	55093	ENSG00000156795	NTAQ1	N-terminal glutamine amidase 1	-0.156434	0.319234
80071	312.27	257.464	276.485	254.257	222.965	197.491	253.489	-0.289184	0.123735	-2.33713	0.0194325	0.0585774	80071	ENSG00000149548	CCDC15	coiled-coil domain containing 15	0.347617	0.0830103
54931	969.337	829.066	901.254	707.798	714.889	765.409	814.626	-0.28912	0.0802204	-3.60408	0.000313266	0.00168469	54931	ENSG00000174173	TRMT10C	tRNA methyltransferase 10C, mitochondrial RNase P subunit	0.129299	0.280548	YES
84750	222.275	273.657	247.55	186.521	182.972	226.314	223.215	-0.289091	0.128336	-2.25261	0.024284	0.0708002	84750	ENSG00000172728	FUT10	fucosyltransferase 10	-0.279624	0.140423
493869	4496.47	4006.88	4249.08	3511.5	3280.49	3599.67	3857.35	-0.289033	0.0562826	-5.13539	2.8156e-07	2.87794e-06	493869	ENSG00000164294	GPX8	glutathione peroxidase 8 (putative)	-0.0404623	0.737557	YES
105376780	16.264	18.6216	23.5762	8.8352	14.9977	11.7427	15.6729	-0.288993	0.20111	-1.43699	0.150721	0.296316	105376780	NA	NA	NA	-0.226193	0.56264
7866	1992.89	2065.38	2076.85	1594.26	1801.72	1601.27	1855.4	-0.28892	0.0626383	-4.61251	3.97839e-06	3.33274e-05	7866	ENSG00000214706	IFRD2	interferon related developmental regulator 2	-0.108552	0.31116
5425	4656.94	4745.27	4803.12	3591.02	4186.35	3804.63	4297.89	-0.288897	0.0563843	-5.12371	2.99582e-07	3.05271e-06	5425	ENSG00000106628	POLD2	DNA polymerase delta 2, accessory subunit	0.236136	0.0183014	YES
29789	3629.05	3250.68	3609.3	2893.04	2744.57	2907.92	3172.43	-0.288845	0.0566908	-5.0951	3.48562e-07	3.53004e-06	29789	ENSG00000138430	OLA1	Obg like ATPase 1	-0.0484859	0.761342	YES
441212	110.595	102.014	120.024	85.4069	100.984	71.5236	98.4248	-0.288793	0.164271	-1.75802	0.0787435	0.181163	441212	ENSG00000205763	RP9P	RP9 pseudogene	0.4288	0.025138
7374	2480.81	2309.89	2361.91	1866.19	1981.69	1982.38	2163.81	-0.288556	0.0569385	-5.06786	4.02312e-07	4.01534e-06	7374	ENSG00000076248	UNG	uracil DNA glycosylase	-0.209604	0.059976
84243	1406.3	1263.84	1463.87	1082.8	1184.82	1089.93	1248.59	-0.288423	0.0722332	-3.99294	6.52594e-05	0.000418877	84243	ENSG00000204160	ZDHHC18	zinc finger DHHC-type palmitoyltransferase 18	-0.302281	0.000618506	YES
10694	7312.31	6630.91	6897.11	5651.58	5613.13	5746.44	6308.58	-0.288345	0.0480155	-6.00525	1.91033e-09	2.7408e-08	10694	ENSG00000156261	CCT8	chaperonin containing TCP1 subunit 8	0.117955	0.28533	YES
100507487	49.8764	50.1974	38.5792	40.2492	30.9952	29.8905	39.9647	-0.288218	0.197438	-1.45979	0.144348	0.287149	100507487	ENSG00000251432	LINC02615	long intergenic non-protein coding RNA 2615	0.705192	0.0047695
5464	3369.91	3013.46	3142.07	2607.37	2514.61	2645.31	2882.12	-0.287942	0.0559857	-5.14314	2.70189e-07	2.76856e-06	5464	ENSG00000180817	PPA1	inorganic pyrophosphatase 1	0.4891	3.80857e-05	YES
3094	5415.93	5039.17	5379.66	4180.03	4517.3	4226.3	4793.06	-0.287838	0.0510233	-5.6413	1.6877e-08	2.11641e-07	3094	ENSG00000169567	HINT1	histidine triad nucleotide binding protein 1	0.291743	0.144603	YES
286257	1292.45	1169.11	1290.26	966.964	1097.83	984.25	1133.48	-0.287504	0.0734259	-3.91557	9.01908e-05	0.000560825	286257	ENSG00000148362	PAXX	PAXX non-homologous end joining factor	-0.0589126	0.74048
129401	263.477	225.079	246.479	177.686	210.967	198.558	220.374	-0.28749	0.125176	-2.29669	0.0216362	0.0642191	129401	ENSG00000163002	NUP35	nucleoporin 35	0.325426	0.00253022	YES
84815	473.826	399.96	442.59	372.06	307.952	380.036	396.071	-0.287322	0.106673	-2.69347	0.00707122	0.0253246	84815	ENSG00000266709	MGC12916	uncharacterized protein MGC12916	-0.207205	0.047232
387893	2307.33	2351.18	2296.54	1935.89	1898.7	1844.67	2105.72	-0.28722	0.0544305	-5.27682	1.31445e-07	1.41998e-06	387893	ENSG00000183955	KMT5A	lysine methyltransferase 5A	-0.17352	0.165865	YES
382	11475.9	11823.1	11467.7	9594.05	9498.52	9345.04	10534	-0.287214	0.0402643	-7.13321	9.80563e-13	2.07779e-11	382	ENSG00000165527	ARF6	ADP ribosylation factor 6	-0.662276	4.30685e-10	YES	YES
23138	905.365	1005.57	965.553	701.908	909.859	721.641	868.315	-0.287207	0.0901114	-3.18725	0.00143635	0.00646513	23138	ENSG00000145911	N4BP3	NEDD4 binding protein 3	0.0250069	0.88728
133308	277.573	293.088	327.924	239.532	252.961	229.516	270.099	-0.287072	0.115335	-2.48903	0.0128092	0.0415892	133308	ENSG00000164038	SLC9B2	solute carrier family 9 member B2	-0.164994	0.328345
11249	50.9607	29.9565	37.5076	26.5056	19.9969	36.2956	33.5371	-0.287013	0.202986	-1.41395	0.157376	0.305617	11249	ENSG00000144227	NXPH2	neurexophilin 2	-1.83896	9.39661e-10
55703	635.382	550.552	626.913	494.771	459.928	512.408	546.659	-0.286779	0.0913007	-3.14104	0.00168349	0.00740609	55703	ENSG00000013503	POLR3B	RNA polymerase III subunit B	-0.0216004	0.922009	YES
84126	530.208	510.07	472.596	413.291	423.934	388.576	456.446	-0.286396	0.0940437	-3.04535	0.00232411	0.00977428	84126	ENSG00000164053	ATRIP	ATR interacting protein	-0.099044	0.458829	YES
9304	33.6124	26.718	18.218	21.5972	14.9977	14.9452	21.6814	-0.286339	0.204416	-1.40076	0.161284	0.311051	9304	ENSG00000277194	SNORD22	small nucleolar RNA, C/D box 22	0.213133	0.471051
162681	649.477	681.713	632.271	562.508	471.927	560.446	593.057	-0.286322	0.0898215	-3.18768	0.00143419	0.0064572	162681	ENSG00000166845	C18orf54	chromosome 18 open reading frame 54	0.19658	0.109792
51582	5463.63	5094.22	5267.14	4331.21	4003.38	4592.46	4792.01	-0.286215	0.0553001	-5.17567	2.2709e-07	2.36059e-06	51582	ENSG00000155096	AZIN1	antizyme inhibitor 1	-0.116031	0.416584	YES
6374	37550.4	38014	37900.9	33036.8	29567.4	30212.9	34380.4	-0.286079	0.0459237	-6.22945	4.68078e-10	7.18995e-09	6374	ENSG00000163735	CXCL5	C-X-C motif chemokine ligand 5	-1.48081	3.73566e-36
79810	290.584	299.565	281.843	225.788	232.964	244.461	262.534	-0.28603	0.113556	-2.51884	0.0117741	0.0388119	79810	ENSG00000049883	PTCD2	pentatricopeptide repeat domain 2	0.0559039	0.768352	YES
22866	36.8652	28.3372	30.0061	23.5605	22.9964	19.2153	26.8301	-0.285951	0.203863	-1.40266	0.160717	0.310283	22866	ENSG00000149970	CNKSR2	connector enhancer of kinase suppressor of Ras 2	-0.962216	0.00112299
3096	1323.89	1262.22	1377.06	1048.44	1007.84	1172.13	1198.6	-0.285918	0.0722163	-3.9592	7.52024e-05	0.000475314	3096	ENSG00000095951	HIVEP1	HIVEP zinc finger 1	-0.258094	0.257414	YES
2013	579	582.128	517.605	420.163	493.923	448.357	506.863	-0.285563	0.0942065	-3.03124	0.00243548	0.0101882	2013	ENSG00000213853	EMP2	epithelial membrane protein 2	-0.0663543	0.749732	YES	YES
5241	3.25281	12.1445	12.8597	0	1.99969	6.4051	6.11031	-0.285527	0.155417	-1.83716	0.0661863	0.158288	5241	ENSG00000082175	PGR	progesterone receptor	-0.0438232	NA
1576	7.58989	17.812	13.9314	7.85351	6.99891	5.33758	9.92054	-0.285162	0.187275	-1.52269	0.127836	0.262664	1576	ENSG00000160868	CYP3A4	cytochrome P450 family 3 subfamily A member 4	-0.0903844	NA
57510	2935.12	2849.92	2996.32	2307.95	2275.65	2591.93	2659.48	-0.285155	0.059199	-4.81689	1.45816e-06	1.31409e-05	57510	ENSG00000124571	XPO5	exportin 5	-0.285582	0.0036254	YES
79026	58795.6	56313.4	59546	46950.3	45273	50728.4	52934.4	-0.285074	0.0471788	-6.04242	1.51818e-09	2.19917e-08	79026	ENSG00000124942	AHNAK	AHNAK nucleoprotein	-0.315945	0.084313
26814	3.25281	8.09635	6.42987	0	1.99969	0	3.29645	-0.285018	0.132115	-2.15735	0.0309786	NA	26814	ENSG00000200831	SNORD36B	small nucleolar RNA, C/D box 36B	-0.0327702	0.941302
23566	75.8989	96.3466	78.2301	73.6267	49.9922	69.3886	73.9138	-0.284913	0.178496	-1.59619	0.110446	0.235786	23566	ENSG00000171517	LPAR3	lysophosphatidic acid receptor 3	-0.192037	0.604015
128646	5.42135	8.09635	9.64481	1.96338	3.99938	1.06752	5.03213	-0.284897	0.157215	-1.81215	0.0699629	NA	128646	ENSG00000125900	SIRPD	signal regulatory protein delta	0.0236211	NA
8862	23.8539	52.6263	32.1494	28.469	21.9966	25.6204	30.7859	-0.284875	0.204097	-1.39578	0.16278	0.313387	8862	ENSG00000171388	APLN	apelin	-0.275752	0.381481
344558	35.7809	23.4794	26.7911	13.7436	30.9952	10.6752	23.5776	-0.284819	0.203967	-1.3964	0.162596	0.313141	344558	ENSG00000172985	SH3RF3	SH3 domain containing ring finger 3	-0.507948	0.0889643
64841	2383.22	2158.49	2280.46	1848.52	1700.74	2018.67	2065.02	-0.284644	0.0667475	-4.26449	2.00362e-05	0.000145949	64841	ENSG00000100522	GNPNAT1	glucosamine-phosphate N-acetyltransferase 1	-0.455332	2.04901e-09	YES
80777	4449.84	3918.63	4254.43	3381.92	3572.44	3361.61	3823.15	-0.284637	0.0559208	-5.09001	3.58054e-07	3.61318e-06	80777	ENSG00000103018	CYB5B	cytochrome b5 type B	0.284657	0.000629321	YES
56833	67.2247	83.3924	52.5106	67.7365	46.9927	37.3631	59.2033	-0.284615	0.191749	-1.48431	0.137726	0.277433	56833	ENSG00000158714	SLAMF8	SLAM family member 8	-2.28082	6.56802e-15
10799	279.742	251.796	271.126	229.715	196.969	217.773	241.187	-0.284548	0.119615	-2.37888	0.0173655	0.0534283	10799	ENSG00000124787	RPP40	ribonuclease P/MRP subunit p40	0.182546	0.298689
8910	1336.9	1361	1340.63	1126	1055.84	1117.69	1223.01	-0.284542	0.0646293	-4.40267	1.06925e-05	8.19313e-05	8910	ENSG00000127990	SGCE	sarcoglycan epsilon	0.358339	0.00392459
441478	53.1292	34.0047	42.8658	29.4507	36.9942	26.6879	37.1888	-0.284426	0.200022	-1.42197	0.155035	0.302423	441478	ENSG00000198435	NRARP	NOTCH regulated ankyrin repeat protein	-1.29642	1.68565e-05
283212	164.809	178.12	160.747	132.528	133.979	135.575	150.96	-0.28433	0.138929	-2.04659	0.0406984	0.107351	283212	ENSG00000149243	KLHL35	kelch like family member 35	-0.328277	0.256177
102465463	4.33708	10.5253	19.2896	0	5.99907	6.4051	7.75935	-0.284287	0.16505	-1.72243	0.0849916	0.192193	102465463	ENSG00000274816	MIR6772	microRNA 6772	-0.0727963	0.818887
8038	6772.35	7584.66	7078.22	6026.59	5646.12	5879.88	6497.97	-0.28425	0.0513799	-5.53231	3.16038e-08	3.78787e-07	8038	ENSG00000148848	ADAM12	ADAM metallopeptidase domain 12	0.566021	2.56233e-05	YES
401014	5.42135	8.09635	5.35823	0.981689	1.99969	1.06752	3.8208	-0.284223	0.144773	-1.96323	0.049619	NA	401014	ENSG00000226674	TEX41	testis expressed 41	0.0391778	NA
5026	62.8876	57.4841	69.657	36.3225	62.9902	42.7007	55.3403	-0.284178	0.190411	-1.49244	0.135583	0.274453	5026	ENSG00000083454	P2RX5	purinergic receptor P2X 5	-0.316924	0.283862
1181	261.309	241.271	303.276	190.448	235.963	218.841	241.851	-0.284103	0.125684	-2.26046	0.0237927	0.0696133	1181	ENSG00000114859	CLCN2	chloride voltage-gated channel 2	-0.115827	0.647271	YES
57001	529.123	505.212	531.536	427.035	386.94	456.897	472.791	-0.283904	0.0941178	-3.01647	0.00255734	0.01062	57001	ENSG00000196636	SDHAF3	succinate dehydrogenase complex assembly factor 3	0.390969	0.0176331
11019	232.034	215.363	245.407	190.448	179.972	184.68	207.984	-0.283847	0.124804	-2.27433	0.0229459	0.0675423	11019	ENSG00000121897	LIAS	lipoic acid synthetase	0.188263	0.23653	YES
6867	5106.91	5228.62	5253.21	4355.75	4078.37	4337.32	4726.7	-0.283833	0.0474035	-5.9876	2.12965e-09	3.037e-08	6867	ENSG00000147526	TACC1	transforming acidic coiled-coil containing protein 1	-0.224339	0.0937285	YES
23037	869.584	852.546	953.765	724.486	717.888	737.654	809.321	-0.283684	0.0766866	-3.69927	0.000216224	0.00121971	23037	ENSG00000133401	PDZD2	PDZ domain containing 2	-0.0838317	0.64435
221749	2945.96	2779.48	2824.86	2263.77	2532.61	2192.68	2589.89	-0.283663	0.0607105	-4.67239	2.9772e-06	2.54959e-05	221749	ENSG00000168994	PXDC1	PX domain containing 1	0.18852	0.0154668	YES	YES
2790	21.6854	22.6698	13.9314	7.85351	15.9975	11.7427	15.6467	-0.283556	0.200317	-1.41554	0.156911	0.305073	2790	ENSG00000242616	GNG10	G protein subunit gamma 10	0.0988859	0.814268
100216001	194.084	168.404	143.601	144.308	113.982	143.047	151.238	-0.283424	0.147462	-1.92201	0.0546047	0.135613	100216001	ENSG00000231298	MANCR	mitotically associated long non coding RNA	-0.729035	0.019803
1854	2930.78	2815.1	2921.31	2274.57	2586.6	2224.7	2625.51	-0.283327	0.0612557	-4.62531	3.74037e-06	3.1429e-05	1854	ENSG00000128951	DUT	deoxyuridine triphosphatase	0.0985598	0.604804
4953	7033.66	6547.52	6965.7	5446.41	5571.13	5817.97	6230.4	-0.283042	0.0481141	-5.88273	4.03555e-09	5.53523e-08	4953	ENSG00000115758	ODC1	ornithine decarboxylase 1	0.0996983	0.383747	YES
51665	3544.48	3415.04	3572.87	2778.18	2961.54	2887.63	3193.29	-0.282867	0.0509174	-5.55541	2.76963e-08	3.35605e-07	51665	ENSG00000065802	ASB1	ankyrin repeat and SOCS box containing 1	-0.496955	2.00021e-11	YES
374899	123.607	125.493	107.165	97.1872	79.9876	103.549	106.165	-0.282503	0.15936	-1.77274	0.0762715	0.176532	374899	ENSG00000185869	ZNF829	zinc finger protein 829	-0.916316	0.000731875
7477	3017.52	3062.04	3072.41	2372.74	2639.59	2486.25	2775.09	-0.282394	0.0545492	-5.17687	2.25642e-07	2.34702e-06	7477	ENSG00000188064	WNT7B	Wnt family member 7B	-0.582102	9.57507e-05
292	9318.21	8785.35	8762.85	7249.77	7334.86	7453.4	8150.74	-0.282316	0.0439881	-6.41801	1.38068e-10	2.28427e-09	292	ENSG00000005022	SLC25A5	solute carrier family 25 member 5	0.081048	0.581694	YES
120863	54.2135	55.0552	52.5106	38.2859	34.9946	48.0382	47.183	-0.282026	0.191852	-1.47002	0.141557	0.282807	120863	ENSG00000166153	DEPDC4	DEP domain containing 4	0.485258	0.0647995
9019	7146.42	7372.54	7115.73	5854.79	5967.07	5937.53	6565.68	-0.281961	0.0426566	-6.61003	3.84241e-11	6.74892e-10	9019	ENSG00000197965	MPZL1	myelin protein zero like 1	-0.511262	0.000191984	YES
54958	1127.64	1216.07	1093.08	866.831	1031.84	909.524	1040.83	-0.2819	0.0777587	-3.62532	0.000288607	0.00157169	54958	ENSG00000130748	TMEM160	transmembrane protein 160	0.226231	0.275666	YES	YES
57291	1397.62	1398.24	1515.31	1170.17	1229.81	1124.09	1305.87	-0.281881	0.0667533	-4.22273	2.41363e-05	0.000172099	57291	ENSG00000226950	DANCR	differentiation antagonizing non-protein coding RNA	0.641525	1.50663e-05
858	8665.48	8086.63	8046.99	7041.66	6510.99	6785.14	7522.81	-0.281811	0.0485264	-5.80738	6.34581e-09	8.49259e-08	858	ENSG00000105971	CAV2	caveolin 2	0.358921	4.85689e-05
22995	447.803	461.492	430.802	365.188	335.948	388.576	404.968	-0.281794	0.0985947	-2.8581	0.00426183	0.0165196	22995	ENSG00000103995	CEP152	centrosomal protein 152	0.0577492	0.735852
23254	1137.4	1112.44	1180.95	938.495	982.847	880.701	1038.81	-0.281769	0.07077	-3.98148	6.84866e-05	0.000437045	23254	ENSG00000189337	KAZN	kazrin, periplakin interacting protein	-0.279712	0.0128845	YES
79728	1037.65	1003.95	998.774	822.655	827.871	834.798	920.949	-0.281727	0.0702036	-4.013	5.9952e-05	0.000387554	79728	ENSG00000083093	PALB2	partner and localizer of BRCA2	0.180828	0.15294
8568	1588.45	1713.19	1697.49	1272.27	1478.77	1339.73	1514.98	-0.281724	0.0680834	-4.13792	3.50461e-05	0.00024015	8568	ENSG00000160214	RRP1	ribosomal RNA processing 1	-0.309675	0.00510934	YES
7172	1159.08	1120.53	1092.01	947.33	865.865	943.685	1021.42	-0.281512	0.0706427	-3.98501	6.74787e-05	0.000431613	7172	ENSG00000137364	TPMT	thiopurine S-methyltransferase	0.128516	0.23854
3725	16940.6	19025.6	18267.3	14465.2	15492.6	14537.4	16454.8	-0.281447	0.0497459	-5.65768	1.5343e-08	1.93876e-07	3725	ENSG00000177606	JUN	Jun proto-oncogene, AP-1 transcription factor subunit	-0.618423	3.56142e-15	YES	YES
79966	2299.74	2394.09	2284.75	1930.98	1845.71	1947.15	2117.07	-0.281412	0.0555637	-5.06468	4.09093e-07	4.07074e-06	79966	ENSG00000145284	SCD5	stearoyl-CoA desaturase 5	-0.0664376	0.769564
27076	29.2753	19.4312	23.5762	10.7986	19.9969	16.0127	19.8485	-0.281291	0.2039	-1.37955	0.167725	0.320369	27076	ENSG00000124466	LYPD3	LY6/PLAUR domain containing 3	0.226356	0.56561
79902	2531.77	2347.13	2429.42	2027.19	1994.69	1965.3	2215.92	-0.281284	0.0553753	-5.07959	3.78257e-07	3.7982e-06	79902	ENSG00000125450	NUP85	nucleoporin 85	-0.0136712	0.931174	YES
145853	73.7303	81.7731	68.5853	50.0661	62.9902	59.7809	66.1543	-0.281189	0.179384	-1.56753	0.116991	0.246449	145853	ENSG00000189227	C15orf61	chromosome 15 open reading frame 61	-0.0586007	0.84596
4598	690.68	637.183	640.844	496.735	590.908	514.543	595.149	-0.281185	0.0893765	-3.14608	0.00165476	0.00729915	4598	ENSG00000110921	MVK	mevalonate kinase	-0.0113455	0.946368	YES
6897	13245.4	12718.6	12934.8	10454	10334.4	11150.2	11806.2	-0.281021	0.044321	-6.34059	2.28888e-10	3.70163e-09	6897	ENSG00000113407	TARS1	threonyl-tRNA synthetase 1	0.297646	0.0115911
26747	482.5	455.015	458.664	370.097	354.945	409.926	421.858	-0.28095	0.0972006	-2.89041	0.00384735	0.0151547	26747	ENSG00000083635	NUFIP1	nuclear FMR1 interacting protein 1	-0.104593	0.43923	YES
92259	422.865	206.457	243.264	220.88	218.966	194.288	251.12	-0.280709	0.199409	-1.40771	0.159218	0.308109	92259	ENSG00000134056	MRPS36	mitochondrial ribosomal protein S36	0.423124	0.154303	YES
1111	1348.83	1268.7	1236.68	1116.18	1002.84	1033.36	1167.76	-0.280671	0.0696854	-4.02769	5.6327e-05	0.000366958	1111	ENSG00000149554	CHEK1	checkpoint kinase 1	0.177901	0.0395379
100422871	7.58989	9.71562	1.07165	0	0.999845	1.06752	3.40742	-0.280657	0.130968	-2.14295	0.0321171	NA	100422871	ENSG00000264720	MIR3117	microRNA 3117	NA	NA
27163	335.039	301.184	289.344	255.239	219.966	272.217	278.832	-0.280623	0.116983	-2.39883	0.0164475	0.0510811	27163	ENSG00000138744	NAAA	N-acylethanolamine acid amidase	0.118783	0.534153
7855	838.14	757.009	800.519	635.153	657.898	661.86	725.097	-0.280401	0.0788844	-3.55458	0.000378585	0.00199149	7855	ENSG00000163251	FZD5	frizzled class receptor 5	-0.281759	0.125218	YES
83439	214.685	183.787	197.183	163.942	162.975	149.452	178.671	-0.280319	0.132684	-2.11268	0.0346278	0.0942414	83439	ENSG00000152284	TCF7L1	transcription factor 7 like 1	-0.436116	0.176537	YES
54602	3517.37	3440.95	3386.4	2970.59	2668.58	2849.2	3138.85	-0.280214	0.0538926	-5.19948	1.99842e-07	2.09581e-06	54602	ENSG00000102471	NDFIP2	Nedd4 family interacting protein 2	-0.0356755	0.704759	YES
25854	213.601	214.553	193.968	164.924	167.974	167.6	187.103	-0.280175	0.128876	-2.17398	0.0297064	0.0832604	25854	ENSG00000109794	FAM149A	family with sequence similarity 149 member A	-0.93329	0.000247825
51226	965	988.564	997.702	813.82	830.871	769.679	894.273	-0.280147	0.0721269	-3.88408	0.000102717	0.000630418	51226	ENSG00000005243	COPZ2	COPI coat complex subunit zeta 2	0.167443	0.452214	YES
5218	1303.29	1243.6	1173.45	1073.97	951.852	1018.41	1127.43	-0.280114	0.0716816	-3.90775	9.31603e-05	0.000578637	5218	ENSG00000058091	CDK14	cyclin dependent kinase 14	-0.487286	3.8243e-05
92856	1498.46	1338.33	1448.87	1130.91	1243.81	1129.43	1298.3	-0.280066	0.0694935	-4.03011	5.57507e-05	0.000363921	92856	ENSG00000136718	IMP4	IMP U3 small nucleolar ribonucleoprotein 4	-0.0517154	0.720235	YES
91752	47.7079	34.0047	33.221	29.4507	24.9961	27.7554	32.856	-0.279951	0.201571	-1.38885	0.164879	0.316274	91752	ENSG00000170396	ZNF804A	zinc finger protein 804A	-0.0985837	0.820393
152195	209.264	170.023	198.254	136.455	157.975	166.533	173.084	-0.279813	0.137842	-2.02995	0.0423617	0.110854	152195	ENSG00000246082	NUDT16L2P	nudix hydrolase 16 like 2, pseudogene	-0.236366	0.28533
1729	8806.44	8693.86	8827.15	7000.42	7069.9	7565.49	7993.88	-0.279743	0.0450896	-6.20417	5.49879e-10	8.3764e-09	1729	ENSG00000131504	DIAPH1	diaphanous related formin 1	-0.374678	0.000354892	YES
1285	18.4326	19.4312	12.8597	13.7436	4.99922	10.6752	13.3569	-0.279701	0.19615	-1.42596	0.15388	0.300728	1285	ENSG00000169031	COL4A3	collagen type IV alpha 3 chain	-0.0136013	NA	YES	YES
102724352	101.921	107.681	113.594	76.5717	100.984	75.7937	96.0912	-0.279501	0.164448	-1.69963	0.0892003	0.199987	102724352	NA	NA	NA	0.0908988	0.832056
5245	5853.97	5851.23	6068.73	4679.71	5240.19	4674.66	5394.75	-0.27931	0.052798	-5.29017	1.222e-07	1.32528e-06	5245	ENSG00000167085	PHB	prohibitin	-9.69263e-05	0.999552	YES
79752	680.921	639.612	671.922	568.398	542.916	513.475	602.874	-0.279291	0.0842575	-3.31473	0.000917324	0.00434864	79752	ENSG00000104231	ZFAND1	zinc finger AN1-type containing 1	0.102225	0.32529	YES
10175	2646.7	2610.26	2687.69	2171.5	2146.67	2206.56	2411.56	-0.27917	0.0519835	-5.37035	7.85855e-08	8.81779e-07	10175	ENSG00000100528	CNIH1	cornichon family AMPA receptor auxiliary protein 1	-0.218064	0.0242349	YES
647946	63.9719	51.007	31.0777	23.5605	35.9944	45.9032	41.9191	-0.279112	0.201437	-1.3856	0.165868	0.31774	647946	ENSG00000267374	MIR924HG	MIR924 host gene	0.429936	0.0163274
114112	209.264	200.789	229.332	185.539	161.975	165.465	192.061	-0.279063	0.129786	-2.15017	0.0315415	0.0873816	114112	ENSG00000197763	TXNRD3	thioredoxin reductase 3	-0.0409782	0.844236
100507006	19.5169	12.1445	18.218	7.85351	6.99891	13.8777	13.1016	-0.27896	0.196158	-1.42212	0.154992	0.302423	100507006	NA	LOC100507006	uncharacterized LOC100507006	0.138111	NA
132	1869.28	1794.96	1759.64	1463.7	1401.78	1584.19	1645.59	-0.27885	0.063552	-4.38774	1.14533e-05	8.7396e-05	132	ENSG00000156110	ADK	adenosine kinase	0.50642	1.94998e-07	YES
26520	492.258	434.774	506.888	355.371	392.939	416.331	433.094	-0.27876	0.100326	-2.77855	0.00546028	0.0205061	26520	ENSG00000100575	TIMM9	translocase of inner mitochondrial membrane 9	-0.136001	0.464512
51522	5593.75	5341.97	5416.1	4511.84	4574.29	4354.4	4965.39	-0.278751	0.0462847	-6.02254	1.71704e-09	2.47854e-08	51522	ENSG00000111843	TMEM14C	transmembrane protein 14C	0.33018	0.0103835	YES
54058	713.449	782.107	797.304	630.244	655.898	588.202	694.534	-0.278726	0.0824417	-3.38089	0.000722512	0.00353304	54058	ENSG00000160298	C21orf58	chromosome 21 open reading frame 58	0.0463855	0.797938
6839	718.871	769.153	776.943	603.739	615.904	634.105	686.452	-0.278702	0.0796068	-3.50098	0.000463545	0.00238526	6839	ENSG00000101945	SUV39H1	suppressor of variegation 3-9 homolog 1	0.125406	0.25806	YES
56034	3967.34	3900.01	3912.58	3358.36	3071.52	3250.59	3576.73	-0.278629	0.0506898	-5.49674	3.8688e-08	4.58048e-07	56034	ENSG00000145431	PDGFC	platelet derived growth factor C	-0.706956	2.60283e-17
81894	1445.33	1472.73	1528.17	1250.67	1183.82	1212.7	1348.9	-0.278613	0.0630346	-4.42001	9.86962e-06	7.62623e-05	81894	ENSG00000155287	SLC25A28	solute carrier family 25 member 28	0.323432	0.00315055	YES
23107	2080.71	1868.64	2005.05	1654.15	1515.76	1711.23	1805.92	-0.278352	0.0651278	-4.27394	1.92048e-05	0.000140512	23107	ENSG00000113048	MRPS27	mitochondrial ribosomal protein S27	-0.10068	0.312887	YES
23421	446.719	391.054	440.446	355.371	315.951	366.158	385.95	-0.278224	0.103072	-2.69931	0.00694839	0.024955	23421	ENSG00000142856	ITGB3BP	integrin subunit beta 3 binding protein	0.459638	0.00085699
81887	2060.11	1933.41	2063.99	1676.72	1687.74	1605.54	1837.92	-0.278174	0.0586417	-4.74362	2.09932e-06	1.84857e-05	81887	ENSG00000001497	LAS1L	LAS1 like ribosome biogenesis factor	0.178851	0.0424503	YES
388115	4508.39	4676.45	4797.76	3833.5	4065.37	3591.13	4245.43	-0.278039	0.0541285	-5.13664	2.79687e-07	2.86056e-06	388115	ENSG00000188549	CCDC9B	coiled-coil domain containing 9B	-0.459639	1.99184e-07	YES	YES
79892	3832.89	3622.31	3614.66	3002.99	3037.53	3060.57	3361.82	-0.277991	0.0496459	-5.59946	2.15016e-08	2.66201e-07	79892	ENSG00000197771	MCMBP	minichromosome maintenance complex binding protein	0.544977	2.7181e-08	YES
79901	4808.74	4861.05	4650.94	4118.19	3783.41	3876.15	4349.75	-0.277945	0.0498298	-5.57789	2.43452e-08	2.98943e-07	79901	ENSG00000071967	CYBRD1	cytochrome b reductase 1	-0.378129	1.06637e-05
23176	5062.45	5202.71	5211.41	4236.97	4339.33	4157.98	4701.81	-0.277896	0.0455595	-6.09963	1.06316e-09	1.57737e-08	23176	ENSG00000164402	SEPTIN8	septin 8	-0.215747	0.00514576
23178	765.494	812.064	842.314	689.146	698.891	589.269	732.863	-0.277757	0.084309	-3.29451	0.000985947	0.00463474	23178	ENSG00000115687	PASK	PAS domain containing serine/threonine kinase	0.229642	0.103016
85450	3531.47	3747.8	3653.24	2839.04	3113.52	3039.22	3320.71	-0.277716	0.0532899	-5.21143	1.87391e-07	1.97651e-06	85450	ENSG00000148841	ITPRIP	inositol 1,4,5-trisphosphate receptor interacting protein	0.084443	0.634799	YES	YES
29114	209.264	219.411	216.472	186.521	173.973	159.06	194.117	-0.277703	0.1281	-2.16786	0.0301694	0.0843008	29114	ENSG00000144834	TAGLN3	transgelin 3	-0.431209	0.138965
7780	24.9382	13.7638	13.9314	6.87182	14.9977	8.54013	13.8405	-0.277686	0.196427	-1.41368	0.157455	0.305699	7780	ENSG00000158014	SLC30A2	solute carrier family 30 member 2	-0.0187712	NA	YES	YES
56890	474.91	506.832	485.456	426.053	386.94	384.306	444.083	-0.277533	0.0944186	-2.93939	0.00328864	0.0132153	56890	ENSG00000111554	MDM1	Mdm1 nuclear protein	0.437572	0.00042474
55651	3094.51	2900.11	3197.79	2354.09	2776.57	2410.45	2788.92	-0.27748	0.0650394	-4.26634	1.9871e-05	0.000144893	55651	ENSG00000145912	NHP2	NHP2 ribonucleoprotein	-0.0290237	0.891461	YES
8602	2836.45	2765.71	2757.34	2245.12	2393.63	2233.24	2538.58	-0.27746	0.0535592	-5.18045	2.21353e-07	2.30386e-06	8602	ENSG00000087269	NOP14	NOP14 nucleolar protein	-0.356987	5.16411e-07	YES
9075	39.0337	48.5781	38.5792	20.6155	40.9936	29.8905	36.2818	-0.27746	0.201324	-1.37818	0.168149	0.320957	9075	ENSG00000165376	CLDN2	claudin 2	-1.20829	7.72783e-07
7941	17.3483	16.1927	12.8597	11.7803	4.99922	9.60765	12.1313	-0.277446	0.194491	-1.42652	0.153718	0.300597	7941	ENSG00000146070	PLA2G7	phospholipase A2 group VII	-0.273885	0.360311	YES
64983	1390.03	1378	1432.79	1174.1	1213.81	1055.77	1274.08	-0.277418	0.0684724	-4.05154	5.08819e-05	0.000335815	64983	ENSG00000106591	MRPL32	mitochondrial ribosomal protein L32	0.259896	0.0573858	YES
8313	103.006	106.872	109.308	81.4802	87.9863	82.1988	95.1418	-0.277366	0.160973	-1.72306	0.084878	0.192041	8313	ENSG00000168646	AXIN2	axin 2	-0.110305	0.701092
7020	445.635	406.437	417.942	330.829	379.941	321.322	383.684	-0.277161	0.102531	-2.70318	0.00686789	0.0247089	7020	ENSG00000137203	TFAP2A	transcription factor AP-2 alpha	0.207119	0.260714
401466	717.786	596.701	737.292	552.691	587.909	529.488	620.311	-0.277034	0.0927018	-2.98844	0.00280404	0.0115	401466	ENSG00000176731	RBIS	ribosomal biogenesis factor	0.445567	0.00519536
9469	6147.81	6679.49	6618.48	5104.78	5525.14	5374.95	5908.44	-0.277021	0.0503965	-5.49684	3.86664e-08	4.58048e-07	9469	ENSG00000122863	CHST3	carbohydrate sulfotransferase 3	0.136429	0.397483
93164	337.208	314.948	290.416	243.459	257.96	263.677	284.611	-0.276771	0.112214	-2.46645	0.0136461	0.0438373	93164	ENSG00000183935	HTR7P1	5-hydroxytryptamine receptor 7 pseudogene 1	-0.129743	0.521628
10924	240.708	215.363	238.977	194.374	183.971	181.478	209.145	-0.276737	0.124556	-2.22178	0.0262979	0.0753949	10924	ENSG00000172594	SMPDL3A	sphingomyelin phosphodiesterase acid like 3A	-0.130456	0.607362
7782	276.489	246.129	250.765	214.008	181.972	228.449	232.969	-0.276404	0.12379	-2.23284	0.0255595	0.0737899	7782	ENSG00000104154	SLC30A4	solute carrier family 30 member 4	-0.348316	0.0645131	YES
26589	673.331	693.857	768.37	565.453	610.905	570.054	646.995	-0.276403	0.0845884	-3.26763	0.00108454	0.00505221	26589	ENSG00000259494	MRPL46	mitochondrial ribosomal protein L46	0.160575	0.383747	YES
5496	7277.62	7237.33	7551.89	5805.71	6389.01	5972.76	6705.72	-0.276388	0.0483611	-5.71509	1.09646e-08	1.42471e-07	5496	ENSG00000115241	PPM1G	protein phosphatase, Mg2+/Mn2+ dependent 1G	-0.212677	0.0132516	YES
10235	8.67416	8.09635	11.7881	4.90845	2.99953	4.27007	6.78944	-0.276369	0.173475	-1.59313	0.11113	0.236909	10235	ENSG00000068831	RASGRP2	RAS guanyl releasing protein 2	0.330211	0.35651
3182	10558.6	10438.6	10939.4	8316.87	9624.5	8328.76	9701.12	-0.27636	0.0554792	-4.98132	6.31525e-07	6.08266e-06	3182	ENSG00000197451	HNRNPAB	heterogeneous nuclear ribonucleoprotein A/B	-0.187099	0.0906232	YES
55665	1657.85	1721.28	1658.91	1290.92	1459.77	1390.97	1529.95	-0.27635	0.0640915	-4.31181	1.61924e-05	0.000119905	55665	ENSG00000106608	URGCP	upregulator of cell proliferation	0.164645	0.124376	YES
7093	3006.68	3087.95	3089.55	2610.31	2515.61	2432.87	2790.5	-0.276311	0.0520087	-5.31279	1.0796e-07	1.18405e-06	7093	ENSG00000095587	TLL2	tolloid like 2	-0.567626	0.000104531
5001	652.73	671.997	641.916	538.947	553.914	517.746	596.208	-0.276245	0.083152	-3.32217	0.000893208	0.0042542	5001	ENSG00000164815	ORC5	origin recognition complex subunit 5	0.33118	0.00251464	YES
54495	4128.9	4009.31	3934.01	3487.94	2972.54	3465.16	3666.31	-0.27619	0.0605701	-4.55984	5.1193e-06	4.21373e-05	54495	ENSG00000166479	TMX3	thioredoxin related transmembrane protein 3	-0.00996788	0.935977	YES
79649	2185.89	2100.19	2148.65	1694.4	1729.73	1868.15	1954.5	-0.275998	0.0588858	-4.687	2.77243e-06	2.38536e-05	79649	ENSG00000129680	MAP7D3	MAP7 domain containing 3	-0.19684	0.0871805
79023	766.579	661.472	709.429	614.537	555.914	575.391	647.22	-0.275991	0.085834	-3.2154	0.00130261	0.00593098	79023	ENSG00000075188	NUP37	nucleoporin 37	0.208759	0.103535
100131067	147.461	131.161	128.597	118.784	116.982	86.4688	121.576	-0.275679	0.155106	-1.77736	0.0755095	0.175087	100131067	ENSG00000247572	CKMT2-AS1	CKMT2 antisense RNA 1	0.12595	0.588474
54920	338.292	300.375	317.207	258.184	258.96	258.339	288.559	-0.27567	0.110246	-2.5005	0.0124018	0.0405075	54920	ENSG00000167264	DUS2	dihydrouridine synthase 2	-0.176636	0.298818	YES
7982	483.584	474.446	473.667	415.254	352.945	400.319	433.369	-0.275543	0.0966612	-2.8506	0.00436363	0.0168944	7982	ENSG00000004866	ST7	suppression of tumorigenicity 7	0.330664	0.0242348	YES
4897	1194.86	1091.39	1157.38	1001.32	869.865	952.225	1044.51	-0.275425	0.073929	-3.72554	0.000194901	0.00111233	4897	ENSG00000091129	NRCAM	neuronal cell adhesion molecule	-0.278664	0.471399
644809	10.8427	15.3831	10.7165	4.90845	6.99891	7.47262	9.38703	-0.275117	0.186994	-1.47126	0.141219	0.282433	644809	ENSG00000176753	C15orf56	chromosome 15 putative open reading frame 56	0.474594	0.179918
51002	688.511	721.385	750.152	607.665	547.915	614.89	655.086	-0.274919	0.0833863	-3.29694	0.000977455	0.00459874	51002	ENSG00000144034	TPRKB	TP53RK binding protein	0.329623	0.0322361	YES
730112	5.42135	10.5253	8.57317	2.94507	2.99953	3.20255	5.61115	-0.274538	0.164281	-1.67114	0.0946934	0.209796	730112	ENSG00000215187	FAM166B	family with sequence similarity 166 member B	-0.0419611	0.920108
7372	1741.34	1627.37	1612.83	1344.91	1408.78	1344	1513.2	-0.274434	0.062189	-4.4129	1.01996e-05	7.85549e-05	7372	ENSG00000114491	UMPS	uridine monophosphate synthetase	0.134248	0.173196	YES
10131	2793.08	2875.82	2849.51	2245.12	2382.63	2395.51	2590.28	-0.274219	0.0529331	-5.18049	2.21304e-07	2.30386e-06	10131	ENSG00000126602	TRAP1	TNF receptor associated protein 1	-0.0388317	0.773319	YES
10857	4957.28	4780.89	4863.13	3917.92	4095.36	4029.88	4440.74	-0.274025	0.0462996	-5.91851	3.2488e-09	4.51988e-08	10857	ENSG00000101856	PGRMC1	progesterone receptor membrane component 1	-0.00928654	0.932643	YES	YES
84908	1548.34	1420.91	1457.44	1203.55	1195.81	1241.52	1344.6	-0.273926	0.0641943	-4.26714	1.97992e-05	0.000144477	84908	ENSG00000035141	FAM136A	family with sequence similarity 136 member A	0.00753051	0.963136	YES
[truncated: 26,396 more rows]

## Sheet: Podocyte Genes TEADi
217 transcripts significantly regulated by TEADi expression (p-value <0.0001) that are higly podocytespecific eriched in vivo
GeneID	featureCounts on Ctrl. repl.-3: Counts	featureCounts on Ctrl. repl.-1: Counts	featureCounts on Ctrl. repl.-2: Counts	featureCounts on TEADi repl.-1: Counts	featureCounts on TEADi repl.-3: Counts	featureCounts on TEADi repl.-2: Counts	Base mean	DESeq2 log2 (FC) TEADi/Ctrl.	StdErr	Wald-Stats	P-value	P-adj <0.0001	-log10 adj. p-value	ENTREZID	ENSEMBL	SYMBOL	GENENAME
27063	8205.75	6208.28	7263.61	1253.62	1262.8	1315.18	4251.54	-2.41186	0.0752965	-32.0315	3.97574e-225	1.09518e-221	60	27063	ENSG00000148677	ANKRD1	ankyrin repeat domain 1
4883	2113.24	2034.61	2052.2	521.277	456.929	597.809	1296.01	-1.90183	0.0782735	-24.2972	2.0987e-130	2.16795e-127	60	4883	ENSG00000113389	NPR3	natriuretic peptide receptor 3
83543	2504.66	2282.36	2522.65	992.488	970.849	1020.55	1715.59	-1.25958	0.0636455	-19.7906	3.5888e-87	2.11842e-84	60	83543	ENSG00000126878	AIF1L	allograft inflammatory factor 1 like
54463	1696.88	1625.75	1582.82	706.816	597.907	726.979	1156.19	-1.22648	0.0760897	-16.1188	1.88142e-58	5.18268e-56	55.2854	54463	ENSG00000154153	RETREG1	reticulophagy regulator 1
1827	9608.8	8897.89	9240.8	4136.84	3909.39	4206.02	6666.62	-1.16218	0.0486807	-23.8735	5.77793e-126	5.61751e-123	60	1827	ENSG00000159200	RCAN1	regulator of calcineurin 1
54507	549.725	576.46	680.495	253.276	246.962	261.542	428.076	-1.15803	0.10427	-11.1061	1.17201e-28	9.58963e-27	26.0182	54507	ENSG00000143382	ADAMTSL4	ADAMTS like 4
8676	354.556	279.324	265.768	122.711	141.978	106.752	211.848	-1.1039	0.138377	-7.97745	1.49385e-15	4.36998e-14	13.3595	8676	ENSG00000135604	STX11	syntaxin 11
53405	40.118	33.195	38.5792	5.89013	5.99907	7.47262	21.8757	-1.09646	0.204316	-5.36649	8.0283e-08	8.98386e-07	6.04654	53405	ENSG00000112782	CLIC5	chloride intracellular channel 5
9052	2757.3	2450.77	2629.82	1187.84	1202.81	1295.97	1920.75	-1.06043	0.0638216	-16.6155	5.3854e-62	1.71173e-59	58.7666	9052	ENSG00000013588	GPRC5A	G protein-coupled receptor class C group 5 member A
5054	81893.8	76172.1	80259.8	37732.2	37147.2	39534.4	58789.9	-1.04684	0.0429804	-24.3564	4.96525e-131	5.47104e-128	60	5054	ENSG00000106366	SERPINE1	serpin family E member 1
1278	96.5	78.5346	91.0899	31.414	27.9956	35.228	60.127	-1.04679	0.185895	-5.63106	1.79102e-08	2.2375e-07	6.65024	1278	ENSG00000164692	COL1A2	collagen type I alpha 2 chain
55638	238.539	184.597	196.111	92.2788	85.9866	91.8064	148.22	-1.00962	0.147289	-6.8547	7.14637e-12	1.3847e-10	9.85864	55638	ENSG00000147642	SYBU	syntabulin
9723	352.388	284.182	278.628	142.345	124.981	148.385	221.818	-1.0041	0.131196	-7.65343	1.95689e-14	5.10956e-13	12.2916	9723	ENSG00000170381	SEMA3E	semaphorin 3E
4071	2352.86	2224.88	2377.98	1175.08	1172.82	1156.12	1743.29	-0.966869	0.05939	-16.28	1.36884e-59	3.90072e-57	56.4089	4071	ENSG00000169908	TM4SF1	transmembrane 4 L six family member 1
51421	8842.22	8915.7	9233.3	4521.66	4964.23	4656.51	6855.6	-0.919404	0.0479659	-19.1679	6.86797e-82	3.54731e-79	60	51421	ENSG00000114019	AMOTL2	angiomotin like 2
6383	6179.25	5700.64	5889.76	3109.99	3115.52	3111.81	4517.83	-0.914549	0.0486097	-18.8141	5.78508e-79	2.81223e-76	60	6383	ENSG00000169439	SDC2	syndecan 2
7057	143576	140187	143624	77568.2	76022.2	80413.9	110232	-0.861322	0.0383283	-22.4722	7.76643e-112	6.75598e-109	60	7057	ENSG00000137801	THBS1	thrombospondin 1
4688	753.567	689.809	766.227	403.474	375.942	408.859	566.313	-0.849223	0.0885179	-9.5938	8.4901e-22	4.23941e-20	19.3727	4688	ENSG00000116701	NCF2	neutrophil cytosolic factor 2
2134	130.112	138.448	120.024	74.6084	60.9905	56.5784	96.7936	-0.808129	0.164737	-4.90557	9.31558e-07	8.68894e-06	5.06103	2134	ENSG00000158008	EXTL1	exostosin like glycosyltransferase 1
6943	86.7416	106.872	111.451	46.1394	50.9921	52.3083	75.7507	-0.780056	0.175464	-4.44567	8.76187e-06	6.86332e-05	4.16347	6943	ENSG00000118526	TCF21	transcription factor 21
306	1999.39	1634.65	1866.81	1001.32	1064.83	1098.47	1444.25	-0.768243	0.0751815	-10.2185	1.6384e-24	1.02187e-22	21.9906	306	ENSG00000138772	ANXA3	annexin A3
5205	3411.11	3088.76	3142.07	1790.6	1886.71	1923.66	2540.48	-0.767158	0.0580151	-13.2234	6.4272e-40	9.57016e-38	37.0191	5205	ENSG00000081923	ATP8B1	ATPase phospholipid transporting 8B1
347733	697.185	745.674	690.14	414.273	421.934	408.859	563.011	-0.741881	0.0862768	-8.59885	8.05179e-18	2.88677e-16	15.5396	347733	ENSG00000137285	TUBB2B	tubulin beta 2B class IIb
214	18335	17485.7	17036	10953.7	9747.48	10882.3	14073.3	-0.731105	0.0512027	-14.2787	2.97279e-46	5.78051e-44	43.238	214	ENSG00000170017	ALCAM	activated leukocyte cell adhesion molecule
59277	1420.39	1280.03	1303.12	800.077	796.876	787.827	1064.72	-0.723241	0.0705593	-10.2501	1.18188e-24	7.5131e-23	22.1242	59277	ENSG00000074527	NTN4	netrin 4
63898	3096.67	2670.99	2907.37	1643.35	1669.74	1887.37	2312.58	-0.716958	0.0676809	-10.5932	3.20447e-26	2.24422e-24	23.6489	63898	ENSG00000104611	SH2D4A	SH2 domain containing 4A
2300	1038.73	1120.53	1122.01	699.944	669.896	623.43	879.091	-0.693319	0.0761041	-9.11013	8.22851e-20	3.43436e-18	17.4642	2300	ENSG00000176678	FOXL1	forkhead box L1
57484	569.241	547.313	581.904	364.207	280.956	371.496	452.52	-0.689004	0.103815	-6.63685	3.20459e-11	5.67082e-10	9.24635	57484	ENSG00000170153	RNF150	ring finger protein 150
10602	9721.56	8664.71	9327.6	5524.95	5575.13	5982.36	7466.05	-0.686121	0.0525418	-13.0586	5.67722e-39	8.15939e-37	36.0883	10602	ENSG00000163171	CDC42EP3	CDC42 effector protein 3
51110	941.146	853.355	955.908	561.526	540.916	575.391	738.04	-0.682492	0.0805656	-8.47126	2.42754e-17	8.28975e-16	15.0815	51110	ENSG00000147592	LACTB2	lactamase beta 2
11080	1931.08	1836.25	1739.28	1188.83	1041.84	1167.86	1484.19	-0.67617	0.0686518	-9.84927	6.90451e-23	3.75387e-21	20.4255	11080	ENSG00000162616	DNAJB4	DnaJ heat shock protein family (Hsp40) member B4
317762	1381.36	1320.51	1505.66	795.168	964.85	832.663	1133.37	-0.669977	0.0794005	-8.43795	3.22953e-17	1.0938e-15	14.9611	317762	ENSG00000205476	CCDC85C	coiled-coil domain containing 85C
84251	521.534	421.82	479.026	265.056	282.956	311.715	380.351	-0.669464	0.107979	-6.19997	5.64739e-10	8.59484e-09	8.06576	84251	ENSG00000118473	SGIP1	SH3GL interacting endocytic adaptor 1
122953	1888.8	1714.81	2015.77	1121.09	1218.81	1142.24	1516.92	-0.667949	0.0700638	-9.53344	1.52161e-21	7.44056e-20	19.1284	122953	ENSG00000140044	JDP2	Jun dimerization protein 2
2152	800.191	724.623	749.08	489.863	388.94	515.611	611.385	-0.663382	0.0966483	-6.86388	6.70168e-12	1.30312e-10	9.88502	2152	ENSG00000117525	F3	coagulation factor III, tissue factor
1286	266.73	309.281	278.628	167.869	171.973	176.14	228.437	-0.659117	0.122288	-5.38987	7.05069e-08	7.97631e-07	6.0982	1286	ENSG00000081052	COL4A4	collagen type IV alpha 4 chain
2762	687.427	659.853	646.202	422.126	428.933	386.441	538.497	-0.65313	0.0883131	-7.39562	1.40745e-13	3.33751e-12	11.4766	2762	ENSG00000112699	GMDS	GDP-mannose 4,6-dehydratase
7430	19381.3	18351.2	18624.1	11659.5	11994.1	12113.1	15353.9	-0.649141	0.0412739	-15.7277	9.77617e-56	2.44819e-53	52.6112	7430	ENSG00000092820	EZR	ezrin
6876	46115.1	41835.5	44583.7	26989.6	29185.5	28226.2	36155.9	-0.642282	0.0468976	-13.6954	1.08143e-42	1.82387e-40	39.739	6876	ENSG00000149591	TAGLN	transgelin
1318	572.494	578.889	599.05	373.042	371.942	350.145	474.26	-0.640385	0.0911669	-7.02432	2.15114e-12	4.40571e-11	10.356	1318	ENSG00000136867	SLC31A2	solute carrier family 31 member 2
79754	297.09	307.661	318.279	183.576	200.969	182.545	248.353	-0.639091	0.117224	-5.45187	4.98422e-08	5.80953e-07	6.23586	79754	ENSG00000196372	ASB13	ankyrin repeat and SOCS box containing 13
51232	17774.4	17042.8	17377.8	11215.8	10539.4	11714.9	14277.5	-0.632648	0.0465003	-13.6053	3.72669e-42	5.98007e-40	39.2233	51232	ENSG00000150938	CRIM1	cysteine rich transmembrane BMP regulator 1
83699	1098.36	1072.77	1050.21	679.329	640.9	726.979	878.092	-0.63179	0.0750813	-8.41474	3.93778e-17	1.31482e-15	14.8811	83699	ENSG00000198478	SH3BGRL2	SH3 domain binding glutamate rich protein like 2
389136	1818.32	1539.12	1635.33	1053.35	960.851	1158.26	1360.87	-0.628909	0.0778576	-8.07768	6.6011e-16	1.99093e-14	13.7009	389136	ENSG00000206538	VGLL3	vestigial like family member 3
4311	2088.3	2050	2053.27	1335.1	1258.8	1372.83	1693.05	-0.628499	0.0597249	-10.5232	6.75088e-26	4.61069e-24	23.3362	4311	ENSG00000196549	MME	membrane metalloendopeptidase
10100	598.517	513.309	530.465	342.609	342.947	374.698	450.424	-0.591691	0.097626	-6.06079	1.35455e-09	1.98125e-08	7.70306	10100	ENSG00000134198	TSPAN2	tetraspanin 2
2297	8539.71	7383.06	8297.75	4950.66	5723.11	5316.23	6701.75	-0.584844	0.0613341	-9.53539	1.49326e-21	7.32362e-20	19.1353	2297	ENSG00000251493	FOXD1	forkhead box D1
1212	4249.25	4207.67	4257.65	2681.97	3150.51	2675.2	3537.04	-0.566193	0.061091	-9.26802	1.89631e-20	8.40273e-19	18.0756	1212	ENSG00000175416	CLTB	clathrin light chain B
84962	6435.14	6496.51	6813.52	4330.23	4619.28	4331.98	5504.44	-0.56386	0.0481364	-11.7138	1.0831e-31	1.08494e-29	28.9646	84962	ENSG00000129474	AJUBA	ajuba LIM protein
91768	1118.97	1184.5	1173.45	763.754	795.876	788.895	970.907	-0.549754	0.0701743	-7.83412	4.72155e-15	1.31377e-13	12.8815	91768	ENSG00000134508	CABLES1	Cdk5 and Abl enzyme substrate 1
1869	4013.97	4227.91	4058.32	2728.11	2991.53	2642.1	3443.66	-0.546476	0.0557887	-9.79546	1.17762e-22	6.38153e-21	20.1951	1869	ENSG00000101412	E2F1	E2F transcription factor 1
4739	1559.18	1441.15	1538.88	989.543	996.845	1087.8	1268.9	-0.545714	0.0678446	-8.0436	8.72384e-16	2.59798e-14	13.5854	4739	ENSG00000111859	NEDD9	neural precursor cell expressed, developmentally down-regulated 9
[truncated: 165 more rows]

## Sheet: Podo. Genes EPB41L5&TEADi
					118 transcripts significantly down regulated by TEADi expression (p-value <0.0001) and by loss of EPB41L5 (p-value <0.0001) that are expressed in podocytes in vivo
[truncated: 119 more rows]

[truncated: 4 more sheets: GSEA TEADi, GSEA GO Ctrl, GSEA GO TEADi, TFEA TEADi]
