# Supplementary material for: A YAP/TAZ–ARHGAP29–RhoA Signaling Axis Regulates Podocyte Protrusions and Integrin Adhesions
Source: Cells. 2023 Jul 6;12(13):1795. doi: 10.3390/cells12131795 (PMC10340513; doi:10.3390/cells12131795)
Supplement: Supplementary file 1 [file cells-12-01795-s001.zip › Supplementary Table S5.xlsx]

## Sheet: Nephroseq
Data and statistical analysis were retrieved from https://www.nephroseq.org
Dataset	Analysis
Woroniecka Diabetes Glom	Diabetic Nephropathy vs. Healthy Living Donor
Neusser Hypertension Glom	Nephrosclerosis vs. Tumor Nephrectomy
Hodgin FSGS Glom	Minimal Change Disease vs. Normal Kidney
Hodgin FSGS Glom	Focal Segmental Glomerulosclerosis vs. Normal Kidney
Hodgin FSGS Glom	Collapsing Focal Segmental Glomerulosclerosis vs. Normal Kidney
Gene	Neusser Hypertension Glom		Woroniecka Diabetes Glom		Minimal Change Disease vs. Normal Kidney		Focal Segmental Glomerulosclerosis vs. Normal Kidney		Collapsing Focal Segmental Glomerulosclerosis vs. Normal Kidney
	p-value	fould change	p-value	fould change	p-value	fould change	p-value	fould change	p-value	fould change
ARHGAP29	0.064	1.16	0.002	-1.789	0.163	1.661	0.169	-1.381	0.322	-1.48
ACTN4	0.524	1.059	0.000393	-2.145	0.709	1.055	0.061	-1.406	0.002	-2.022
PDLIM5	6.85e-05	1.331	0.000239	-1.674	0.002	1.471	0.065	-1.581	0.014	-1.562
NPHS1	0.109	1.113	1.06e-05	-8.058	0.412	1.877	0.015	-1.993	0.007	-2.183
NPHS2	0.347	1.033	0.026	-4.638	0.866	-1.034	0.052	-1.502	0.013	-2.462
